# Supplementary material for: A Screen for RNA-Binding Proteins in Yeast Indicates Dual Functions for Many Enzymes
Source: PLoS One. 2010 Nov 11;5(11):e15499. doi: 10.1371/journal.pone.0015499 (PMC2988813; doi:10.1371/journal.pone.0015499)
Supplement: Dataset S2 — Raw data of protein arrays probed with total RNA and mRNA. Background substracted median fluorescent signals are shown for both channel, and the percentile ranks and selected proteins preferentially interacting either with mRNA or total RNA are also shown. A key describes different worksheets. (XLS) [file pone.0015499.s007.xls]

## Sheet: key
Raw Data	Raw Data of 'Median Signal-Background' values of poly(A)+RNA channel at 635nm (Cy5) and of total RNA channel at 532nm (Cy3) as retrieved after scanning and resulting percentile ranks of all spot replicates on the protoarray
Collapsed Data	Median percentile rank of all replicates per unique protein
mRNA binders	List of identified poly(A)+ RNA binders (cutoff: percentile rank > 0.9)
Total RNA binders	List of identified total RNA binders (cutoff: percentile rank > 0.95)

## Sheet: Raw Data
	Array No.				Array No.				Array No.				Array No.				Array No.
	990	990	990	990	996	996	996	996	998	998	998	998	915	915	915	915	922	922	922	922
YORF	F635 Median - B635	F532 Median - B532	PercRank F635 Median	PercRank F532 Median	F635 Median - B635	F532 Median - B532	PercRank F635 Median	PercRank F532 Median	F635 Median - B635	F532 Median - B532	PercRank F635 Median	PercRank F532 Median	F635 Median - B635	F532 Median - B532	PercRank F635 Median	PercRank F532 Median	F635 Median - B635	F532 Median - B532	PercRank F635 Median	PercRank F532 Median
YAL003W	-10	31	0.63293	0.48215	-30	51	0.16153	0.74384	-4	57	0.81912	0.95953	-8	23	0.58405	0.78771	1	7	0.48401	0.18291
YAL003W	-18	39	0.5331	0.56087	2	24	0.73925	0.42044	2	42	0.89218	0.91565	-5	-28	0.64549	0.05787	6	31	0.62811	0.70221
YAL007C	-22	27	0.4825	0.4366	-63	32	0.01	0.53541	-13	41	0.59995	0.90984	86	9	0.98596	0.58646	10	25	0.72539	0.58346
YAL007C	-32	28	0.34411	0.44899	-31	54	0.1483	0.76983	-19	24	0.40722	0.76179	-42	-6	0.0436	0.31722	14	17	0.80269	0.39301
YAL008W	-13	62	0.5969	0.74813	-20	25	0.33536	0.43504	-17	32	0.47059	0.85343	6	11	0.8228	0.61592	-4	25	0.32701	0.58346
YAL008W	5	58	0.765	0.72128	-19	31	0.35709	0.52379	-23	17	0.29348	0.64246	-21	11	0.30065	0.61592	-9	23	0.19079	0.53562
YAL009W	19	58	0.84337	0.72128	-44	38	0.05035	0.61243	-20	20	0.37679	0.69591	0	38	0.73443	0.89471	14	34	0.80269	0.75176
YAL009W	8	32	0.78852	0.4942	-28	42	0.18889	0.65957	-10	29	0.68429	0.82288	-9	42	0.5623	0.9122	1	25	0.48401	0.58346
YAL012W	-7	55	0.66494	0.69982	-41	41	0.06426	0.6483	-6	26	0.78185	0.78926	-29	-41	0.17167	0.01438	3	23	0.54224	0.53562
YAL012W	-15	46	0.57292	0.62685	-23	60	0.27891	0.80961	-1	30	0.86152	0.83485	-36	16	0.08767	0.69681	-2	25	0.39175	0.58346
YAL013W	-26	22	0.42845	0.37555	-48	6	0.0338	0.16429	-16	13	0.50341	0.56371	2	1	0.76734	0.44379	8	30	0.68029	0.6852
YAL013W	-34	40	0.31589	0.56947	12	39	0.83329	0.62451	-17	16	0.47059	0.62502	-18	10	0.3652	0.60142	-3	15	0.35795	0.3422
YAL016W	8	129	0.78852	0.95639	-15	22	0.43573	0.38698	-17	-2	0.47059	0.24549	-43	-1	0.03981	0.40789	4	11	0.57033	0.2569
YAL016W	14	123	0.82226	0.95157	-9	46	0.5607	0.69544	-12	48	0.63095	0.94141	1	-17	0.75135	0.15406	2	13	0.51427	0.29801
YAL018C	60	125	0.92025	0.95272	12	100	0.83329	0.94665	-16	31	0.50341	0.84271	-34	-20	0.10723	0.11839	6	4	0.62811	0.13553
YAL018C	72	170	0.92885	0.97785	-10	12	0.53977	0.24085	-33	6	0.1069	0.416	-22	15	0.28155	0.68012	5	25	0.60059	0.58346
YAL019W	-38	-7	0.25943	0.05197	-49	4	0.03081	0.13968	-28	-18	0.1852	0.06143	18	35	0.92336	0.88068	19	55	0.87303	0.94096
YAL019W	-16	18	0.5596	0.32426	-33	-15	0.12669	0.02345	-26	-2	0.22361	0.24549	-16	-7	0.40835	0.2995	37	69	0.96266	0.97099
YAL020C	-12	34	0.60917	0.51222	-2	56	0.67808	0.78351	-6	40	0.78185	0.9046	-12	18	0.50017	0.72477	-1	24	0.42543	0.55811
YAL020C	8	68	0.78852	0.7845	-5	45	0.63014	0.68705	-2	27	0.84921	0.80009	2	21	0.76734	0.76182	-11	24	0.14786	0.55811
YAL022C	10	128	0.80045	0.95559	-22	67	0.29799	0.8464	-23	7	0.29348	0.4372	-29	-14	0.17167	0.19295	-11	22	0.14786	0.51301
YAL022C	167	182	0.95261	0.97991	-42	39	0.06058	0.62451	-32	9	0.12149	0.47754	-4	21	0.6677	0.76182	-3	23	0.35795	0.53562
YAL023C	13	51	0.81721	0.66873	-26	23	0.22372	0.40388	-17	10	0.47059	0.49794	-14	15	0.45575	0.68012	-4	17	0.32701	0.39301
YAL023C	-6	33	0.67527	0.50327	-28	26	0.18889	0.44918	-6	29	0.78185	0.82288	-11	-14	0.52376	0.19295	-1	7	0.42543	0.18291
YAL026C	-148	-32	0.0016	0.00137	-16	66	0.41515	0.84214	-31	-27	0.1338	0.02416	-2	-22	0.70014	0.1009	29	40	0.93845	0.83295
YAL026C	-87	17	0.03293	0.30866	-7	2	0.59611	0.12002	-22	-19	0.31878	0.05561	-13	-11	0.47831	0.23392	13	43	0.78625	0.86526
YAL027W	9	122	0.79414	0.94962	12	81	0.83329	0.90193	-2	29	0.84921	0.82288	-1	-10	0.71855	0.2491	-26	14	0.01724	0.32187
YAL027W	23	131	0.85381	0.95834	23	96	0.8879	0.94044	-22	27	0.31878	0.80009	-22	-16	0.28155	0.16741	-8	18	0.2174	0.41584
YAL028W	11	104	0.80631	0.92197	-12	88	0.49701	0.92239	-12	61	0.63095	0.96512	-50	45	0.01725	0.92164	-12	10	0.12765	0.23544
YAL028W	26	139	0.86299	0.96488	-40	44	0.06932	0.679	-5	57	0.80282	0.95953	-45	29	0.03164	0.84029	2	24	0.51427	0.55811
YAL030W	-3	123	0.70361	0.95157	18	96	0.8679	0.94044	-19	34	0.40722	0.86927	-19	-19	0.34115	0.12748	24	20	0.91459	0.46688
YAL030W	14	133	0.82226	0.96029	-32	22	0.136	0.38698	-11	29	0.65819	0.82288	-10	-6	0.54286	0.31722	16	28	0.8334	0.64501
YAL032C	25	124	0.8592	0.95226	-12	99	0.49701	0.9455	-8	31	0.73729	0.84271	-11	17	0.52376	0.71085	-2	17	0.39175	0.39301
YAL032C	43	117	0.89879	0.94228	-25	42	0.24005	0.65957	-17	45	0.47059	0.9291	-5	-34	0.64549	0.03095	-13	15	0.11224	0.3422
YAL033W	-45	0	0.18255	0.10923	-57	5	0.01552	0.15118	-12	-7	0.63095	0.16981	-30	11	0.15671	0.61592	12	46	0.76729	0.89129
YAL033W	-35	0	0.29925	0.10923	-54	20	0.01988	0.35559	-17	14	0.47059	0.58297	-19	-38	0.34115	0.02048	5	25	0.60059	0.58346
YAL034C	114	194	0.94285	0.98164	6	13	0.7827	0.255	-6	49	0.78185	0.94346	-7	-25	0.60326	0.07513	7	19	0.65528	0.44062
YAL034C	79	115	0.93218	0.93998	17	57	0.86261	0.78972	-12	11	0.63095	0.5188	-20	-44	0.32067	0.01035	8	15	0.68029	0.3422
YAL034W-A	12	135	0.81273	0.96224	-8	62	0.57852	0.82087	18	30	0.96284	0.83485	-15	6	0.43217	0.53549	-18	-1	0.05549	0.07387
YAL034W-A	25	155	0.8592	0.97314	34	124	0.91687	0.97068	68	155	0.98324	0.99076	-23	16	0.26326	0.69681	3	12	0.54224	0.27574
YAL037W	6	74	0.77349	0.81594	-7	57	0.59611	0.78972	-1	32	0.86152	0.85343	-2	-15	0.70014	0.17869	1	29	0.48401	0.66693
YAL037W	-12	66	0.60917	0.77292	7	73	0.79294	0.87249	-18	-2	0.43879	0.24549	-12	-13	0.50017	0.20642	4	2	0.57033	0.10812
YAL038W	14	72	0.82226	0.80573	-7	60	0.59611	0.80961	-11	52	0.65819	0.95007	-41	-5	0.04982	0.33517	-7	19	0.24195	0.44062
YAL038W	-14	75	0.58531	0.82099	-7	32	0.59611	0.53541	-3	27	0.83462	0.80009	-8	-12	0.58405	0.21988	-13	12	0.11224	0.27574
YAL039C	-10	75	0.63293	0.82099	3	74	0.74879	0.87594	6	39	0.92523	0.90027	-34	-8	0.10723	0.28374	-3	25	0.35795	0.58346
YAL039C	10	68	0.80045	0.7845	0	90	0.70935	0.92756	4	30	0.91201	0.83485	-30	-18	0.15671	0.14129	-22	36	0.03082	0.78237
YAL040C	2	71	0.74274	0.8016	-19	21	0.35709	0.371	-15	34	0.53624	0.86927	-40	-1	0.0558	0.40789	-3	20	0.35795	0.46688
YAL040C	23	66	0.85381	0.77292	-8	54	0.57852	0.76983	-19	20	0.40722	0.69591	-29	4	0.17167	0.50132	-17	2	0.06474	0.10812
YAL041W	1	75	0.73482	0.82099	-6	45	0.61335	0.68705	-15	31	0.53624	0.84271	-24	-22	0.24657	0.1009	-23	10	0.02626	0.23544
YAL041W	-15	73	0.57292	0.81055	-13	59	0.47516	0.80363	-9	40	0.71153	0.9046	-28	-3	0.18616	0.37245	-8	12	0.2174	0.27574
YAL042W	1	67	0.73482	0.779	-11	36	0.51954	0.58553	-8	24	0.73729	0.76179	-40	-15	0.0558	0.17869	-24	23	0.02363	0.53562
YAL042W	3	74	0.74985	0.81594	-22	38	0.29799	0.61243	-5	16	0.80282	0.62502	-19	6	0.34115	0.53549	-2	2	0.39175	0.10812
YAL043C	-45	45	0.18255	0.61767	-15	52	0.43573	0.75293	0	14	0.87166	0.58297	-16	-8	0.40835	0.28374	-17	-2	0.06474	0.06736
YAL043C	-28	64	0.4008	0.76179	2	50	0.73925	0.73419	-25	25	0.24515	0.77672	-39	-25	0.06385	0.07513	-10	15	0.17001	0.3422
YAL043C-A	-5	50	0.6841	0.66069	-26	34	0.22372	0.56173	-1	26	0.86152	0.78926	-14	0	0.45575	0.42722	4	32	0.57033	0.71865
YAL043C-A	14	76	0.82226	0.8273	-9	35	0.5607	0.57323	-14	34	0.5661	0.86927	2	2	0.76734	0.46404	5	73	0.60059	0.97442
YAL044C	-27	30	0.41422	0.47114	-19	32	0.35709	0.53541	-3	1	0.83462	0.30396	-29	-14	0.17167	0.19295	-10	-1	0.17001	0.07387
YAL044C	-33	25	0.33	0.41296	-4	43	0.64842	0.67038	-17	30	0.47059	0.83485	-48	-26	0.02289	0.06869	-9	13	0.19079	0.29801
YAL045C	-9	34	0.6436	0.51222	-13	16	0.47516	0.29972	-19	30	0.40722	0.83485	n	n	n	n	-2	-3	0.39175	0.05948
YAL045C	-6	59	0.67527	0.72782	11	22	0.82674	0.38698	-44	4	0.02712	0.36893	n	n	n	n	-2	15	0.39175	0.3422
YAL046C	12	69	0.81273	0.78921	-16	29	0.41515	0.49494	-34	23	0.09528	0.74675	-27	6	0.19951	0.53549	5	84	0.60059	0.98207
YAL046C	14	112	0.82226	0.9362	-11	23	0.51954	0.40388	-16	21	0.50341	0.71176	-33	18	0.11954	0.72477	12	55	0.76729	0.94096
YAL048C	-43	7	0.20218	0.18829	5	60	0.77316	0.80961	-15	8	0.53624	0.45965	-12	10	0.50017	0.60142	-1	2	0.42543	0.10812
YAL048C	-29	2	0.38726	0.13115	-17	49	0.39526	0.72579	-9	5	0.71153	0.39012	-32	-23	0.13128	0.0925	3	11	0.54224	0.2569
YAL049C	5	91	0.765	0.88399	-13	72	0.47516	0.86962	5	47	0.91907	0.93708	-10	-27	0.54286	0.06316	-6	-10	0.26775	0.02591
YAL049C	25	84	0.8592	0.86219	6	92	0.7827	0.93182	-1	45	0.86152	0.9291	-38	-71	0.07191	0.0008	-29	-27	0.0121	0.00262
YAL051W	-8	16	0.65393	0.2981	20	55	0.87617	0.77696	-9	19	0.71153	0.67836	-30	3	0.15671	0.48256	-13	28	0.11224	0.64501
YAL051W	11	42	0.80631	0.58875	-7	56	0.59611	0.78351	-11	21	0.65819	0.71176	-5	-24	0.64549	0.0841	-15	19	0.0862	0.44062
YAL053W	-3	44	0.70361	0.6078	-20	21	0.33536	0.371	-12	-17	0.63095	0.06918	-7	-12	0.60326	0.21988	2	6	0.51427	0.16499
YAL053W	60	122	0.92025	0.94962	-17	12	0.39526	0.24085	-13	-16	0.59995	0.07829	-34	-24	0.10723	0.0841	-3	13	0.35795	0.29801
YAL054C	29	84	0.87022	0.86219	0	39	0.70935	0.62451	-4	31	0.81912	0.84271	-98	-19	0.0008	0.12748	-5	-26	0.29824	0.00308
YAL054C	6	57	0.77349	0.716	-16	30	0.41515	0.50862	7	29	0.93104	0.82288	n	n	n	n	-20	-35	0.04179	0.00079
YAL055W	-44	18	0.19196	0.32426	18	41	0.8679	0.6483	-7	49	0.76065	0.94346	15	-38	0.90657	0.02048	-3	14	0.35795	0.32187
YAL055W	-30	32	0.37314	0.4942	6	77	0.7827	0.88813	1	32	0.88203	0.85343	-29	-2	0.17167	0.38948	-19	8	0.04909	0.19981
YAL056W	6	73	0.77349	0.81055	-20	21	0.33536	0.371	-26	12	0.22361	0.54125	-3	10	0.683	0.60142	-7	-6	0.24195	0.04213
YAL056W	0	70	0.72851	0.79483	-9	31	0.5607	0.52379	-18	27	0.43879	0.80009	-22	-11	0.28155	0.23392	-7	11	0.24195	0.2569
YAL058C-A	-65	-25	0.06873	0.00344	n	n	n	n	-84	-53	0.00159	0.00136	-37	-19	0.07973	0.12748	-3	21	0.35795	0.48812
YAL058C-A	-51	8	0.13333	0.19988	8	63	0.80351	0.82593	-61	-16	0.00512	0.07829	-25	-15	0.22989	0.17869	-16	17	0.07456	0.39301
YAL059W	-31	6	0.35903	0.17636	-32	2	0.136	0.12002	-29	-28	0.16822	0.02062	-22	-4	0.28155	0.35254	6	20	0.62811	0.46688
YAL059W	-33	5	0.33	0.16442	-24	-13	0.26109	0.02885	-35	-1	0.08513	0.26339	5	0	0.81003	0.42722	-6	10	0.26775	0.23544
YAL064C-A	-10	30	0.63293	0.47114	11	121	0.82674	0.9693	-34	-3	0.09528	0.23022	-61	-25	0.00529	0.07513	-2	3	0.39175	0.1208
YAL064C-A	-34	14	0.31589	0.27366	11	96	0.82674	0.94044	-20	8	0.37679	0.45965	-49	19	0.02002	0.73858	-10	14	0.17001	0.32187
YAL064W	-8	54	0.65393	0.69213	-9	53	0.5607	0.76086	-18	14	0.43879	0.58297	-2	-3	0.70014	0.37245	3	-1	0.54224	0.07387
YAL064W	-3	69	0.70361	0.78921	-17	37	0.39526	0.59933	-26	8	0.22361	0.45965	-37	-6	0.07973	0.31722	-18	-4	0.05549	0.05263
YAL066W	-27	44	0.41422	0.6078	-43	10	0.05495	0.21338	-27	28	0.20344	0.81399	-8	-2	0.58405	0.38948	-8	26	0.2174	0.60687
YAL066W	-32	43	0.34411	0.59988	-25	9	0.24005	0.20085	-16	5	0.50341	0.39012	-10	2	0.54286	0.46404	6	26	0.62811	0.60687
YAL068C	-29	-5	0.38726	0.06804	-4	38	0.64842	0.61243	1	39	0.88203	0.90027	-11	16	0.52376	0.69681	9	27	0.70404	0.62537
YAL068C	-33	-4	0.33	0.07596	-2	11	0.67808	0.22545	-10	30	0.68429	0.83485	-21	-15	0.30065	0.17869	10	28	0.72539	0.64501
YAR002W	-1	66	0.72105	0.77292	-21	40	0.31708	0.63612	-26	31	0.22361	0.84271	-19	38	0.34115	0.89471	4	36	0.57033	0.78237
YAR002W	10	54	0.80045	0.69213	-36	34	0.09795	0.56173	-20	16	0.37679	0.62502	-14	42	0.45575	0.9122	21	50	0.89198	0.91813
YAR003W	n	n	n	n	n	n	n	n	-17	48	0.47059	0.94141	-1	8	0.71855	0.56943	19	18	0.87303	0.41584
YAR003W	n	n	n	n	n	n	n	n	-23	21	0.29348	0.71176	-16	0	0.40835	0.42722	21	28	0.89198	0.64501
YAR008W	n	n	n	n	n	n	n	n	-19	22	0.40722	0.72965	-7	8	0.60326	0.56943	1	38	0.48401	0.80965
YAR008W	-79	23	0.04302	0.38772	-33	24	0.12669	0.42044	-11	45	0.65819	0.9291	6	7	0.8228	0.55091	5	1	0.60059	0.09648
YAR014C	-43	-4	0.20218	0.07596	3	90	0.74879	0.92756	-1	-1	0.86152	0.26339	-26	-10	0.21401	0.2491	0	5	0.45375	0.14912
YAR014C	-45	-1	0.18255	0.09959	6	74	0.7827	0.87594	-18	7	0.43879	0.4372	-17	7	0.38626	0.55091	4	13	0.57033	0.29801
YAR015W	-26	70	0.42845	0.79483	-39	26	0.0753	0.44918	-21	0	0.34864	0.28447	3	-2	0.78414	0.38948	3	25	0.54224	0.58346
YAR015W	-18	54	0.5331	0.69213	4	43	0.76178	0.67038	2	-2	0.89218	0.24549	-12	19	0.50017	0.73858	-7	16	0.24195	0.368
YAR018C	-29	28	0.38726	0.44899	-18	22	0.37744	0.38698	-28	44	0.1852	0.92432	-1	40	0.71855	0.90369	13	48	0.78625	0.905
YAR018C	-43	23	0.20218	0.38772	-16	39	0.41515	0.62451	-36	19	0.07658	0.67836	-17	66	0.38626	0.958	23	24	0.90614	0.55811
YAR019C	7	-22	0.78164	0.0055	9	-38	0.81248	0.00206	3	-52	0.90289	0.00148	7	-29	0.83396	0.05315	12	75	0.76729	0.97545
YAR019C	1	-24	0.73482	0.00436	0	-39	0.70935	0.0016	2	-23	0.89218	0.03521	-7	34	0.60326	0.87504	8	30	0.68029	0.6852
YAR023C	51	155	0.91072	0.97314	-20	31	0.33536	0.52379	-24	2	0.26817	0.32562	-6	-26	0.62581	0.06869	-5	14	0.29824	0.32187
YAR023C	29	97	0.87022	0.90304	-11	29	0.51954	0.49494	-19	19	0.40722	0.67836	-3	1	0.683	0.44379	-12	12	0.12765	0.27574
YAR027W	-37	28	0.27148	0.44899	-15	52	0.43573	0.75293	-20	43	0.37679	0.92056	-30	4	0.15671	0.50132	3	21	0.54224	0.48812
YAR027W	-50	26	0.13952	0.42558	-1	81	0.69314	0.90193	-15	40	0.53624	0.9046	-8	2	0.58405	0.46404	-17	17	0.06474	0.39301
YAR028W	80	195	0.93275	0.98175	-2	85	0.67808	0.91354	-14	51	0.5661	0.94814	-8	-8	0.58405	0.28374	-18	27	0.05549	0.62537
YAR028W	63	197	0.92254	0.98198	-11	77	0.51954	0.88813	-21	36	0.34864	0.88226	-12	-1	0.50017	0.40789	-12	5	0.12765	0.14912
YAR029W	-56	21	0.10338	0.36247	-22	23	0.29799	0.40388	-20	6	0.37679	0.416	-17	-4	0.38626	0.35254	-8	7	0.2174	0.18291
YAR029W	-48	43	0.15421	0.59988	-27	5	0.20406	0.15118	-7	32	0.76065	0.85343	-20	-4	0.32067	0.35254	-9	12	0.19079	0.27574
YAR030C	24	111	0.85702	0.93436	-36	15	0.09795	0.28466	-21	8	0.34864	0.45965	-20	-21	0.32067	0.11011	-6	20	0.26775	0.46688
YAR030C	18	102	0.84084	0.91669	-17	48	0.39526	0.71545	-24	17	0.26817	0.64246	-14	-14	0.45575	0.19295	-13	14	0.11224	0.32187
YAR033W	8	62	0.78852	0.74813	-1	49	0.69314	0.72579	-1	55	0.86152	0.95634	-41	-16	0.04982	0.16741	-25	4	0.01963	0.13553
YAR033W	2	81	0.74274	0.85094	24	113	0.88997	0.96229	14	2	0.95589	0.32562	-16	-6	0.40835	0.31722	-29	3	0.0121	0.1208
YAR042W	-53	5	0.12002	0.16442	-22	18	0.29799	0.32754	-21	4	0.34864	0.36893	-10	-39	0.54286	0.01875	5	18	0.60059	0.41584
YAR042W	-37	-17	0.27148	0.01296	-1	52	0.69314	0.75293	-11	-3	0.65819	0.23022	-44	-4	0.0352	0.35254	8	8	0.68029	0.19981
YAR047C	22	95	0.85117	0.89764	-10	29	0.53977	0.49494	-16	13	0.50341	0.56371	-32	-21	0.13128	0.11011	-6	24	0.26775	0.55811
YAR047C	14	101	0.82226	0.9144	-19	37	0.35709	0.59933	-15	29	0.53624	0.82288	-18	12	0.3652	0.63099	2	17	0.51427	0.39301
YAR068W	-16	35	0.5596	0.52208	-3	31	0.66383	0.52379	-25	23	0.24515	0.74675	-3	122	0.683	0.98159	-11	33	0.14786	0.73361
YAR068W	-8	32	0.65393	0.4942	-12	8	0.49701	0.18808	-14	-7	0.5661	0.16981	-7	61	0.60326	0.95282	8	31	0.68029	0.70221
YAR075W	-4	127	0.6942	0.95479	-6	57	0.61335	0.78972	-23	21	0.29348	0.71176	-19	-15	0.34115	0.17869	-10	17	0.17001	0.39301
YAR075W	16	119	0.83281	0.94606	36	30	0.92182	0.50862	-12	17	0.63095	0.64246	-23	-3	0.26326	0.37245	5	21	0.60059	0.48812
YBL001C	-4	37	0.6942	0.54297	8	0	0.80351	0.10312	-19	0	0.40722	0.28447	-27	-3	0.19951	0.37245	-11	33	0.14786	0.73361
YBL001C	-22	8	0.4825	0.19988	-13	40	0.47516	0.63612	-17	-3	0.47059	0.23022	-30	41	0.15671	0.90829	-9	20	0.19079	0.46688
YBL002W	37	157	0.8895	0.97395	-20	57	0.33536	0.78972	-32	21	0.12149	0.71176	-11	97	0.52376	0.97606	7	3	0.65528	0.1208
YBL002W	86	226	0.93505	0.98462	-19	12	0.35709	0.24085	-14	25	0.5661	0.77672	-13	111	0.47831	0.98009	-5	15	0.29824	0.3422
YBL003C	36	115	0.88743	0.93998	-11	39	0.51954	0.62451	-20	-6	0.37679	0.18589	-8	-9	0.58405	0.26659	-19	18	0.04909	0.41584
YBL003C	5	91	0.765	0.88399	-24	44	0.26109	0.679	-20	7	0.37679	0.4372	-37	0	0.07973	0.42722	-19	12	0.04909	0.27574
YBL006C	-24	68	0.45496	0.7845	-23	34	0.27891	0.56173	-8	19	0.73729	0.67836	-42	0	0.0436	0.42722	-14	17	0.09796	0.39301
YBL006C	-4	38	0.6942	0.55261	-21	36	0.31708	0.58553	-21	33	0.34864	0.86015	-35	3	0.09676	0.48256	-3	28	0.35795	0.64501
YBL007C	-35	43	0.29925	0.59988	-59	14	0.01322	0.26983	-7	11	0.76065	0.5188	-3	26	0.683	0.81774	8	12	0.68029	0.27574
YBL007C	62	139	0.92197	0.96488	-25	20	0.24005	0.35559	-12	-22	0.63095	0.03989	-19	12	0.34115	0.63099	-10	0	0.17001	0.08495
YBL008W	-7	58	0.66494	0.72128	3	69	0.74879	0.8572	-16	37	0.50341	0.88716	-4	-22	0.6677	0.1009	-8	5	0.2174	0.14912
YBL008W	13	104	0.81721	0.92197	-11	50	0.51954	0.73419	-9	24	0.71153	0.76179	-33	-32	0.11954	0.03935	-9	-5	0.19079	0.04761
YBL009W	7	98	0.78164	0.90567	-22	15	0.29799	0.28466	-32	-7	0.12149	0.16981	-5	15	0.64549	0.68012	-25	11	0.01963	0.2569
YBL009W	12	63	0.81273	0.75547	-8	43	0.57852	0.67038	-14	19	0.5661	0.67836	-7	57	0.60326	0.94557	-17	-6	0.06474	0.04213
YBL010C	-16	66	0.5596	0.77292	-19	57	0.35709	0.78972	-20	20	0.37679	0.69591	-44	-31	0.0352	0.04429	-16	11	0.07456	0.2569
YBL010C	-5	63	0.6841	0.75547	44	172	0.93205	0.98735	-12	30	0.63095	0.83485	-21	-25	0.30065	0.07513	-1	19	0.42543	0.44062
YBL011W	48	91	0.90648	0.88399	-15	37	0.43573	0.59933	-5	80	0.80282	0.97891	57	64	0.98089	0.9557	-4	8	0.32701	0.19981
YBL011W	25	75	0.8592	0.82099	-6	54	0.61335	0.76983	2	25	0.89218	0.77672	-49	-21	0.02002	0.11011	-14	21	0.09796	0.48812
YBL012C	-16	67	0.5596	0.779	-18	53	0.37744	0.76086	4	55	0.91201	0.95634	-21	-3	0.30065	0.37245	9	3	0.70404	0.1208
YBL012C	-10	53	0.63293	0.68514	-23	57	0.27891	0.78972	-13	21	0.59995	0.71176	-7	-30	0.60326	0.0489	-10	13	0.17001	0.29801
YBL013W	-9	60	0.6436	0.73585	-59	-13	0.01322	0.02885	-10	31	0.68429	0.84271	-5	-17	0.64549	0.15406	-4	15	0.32701	0.3422
YBL013W	-25	50	0.44211	0.66069	-34	3	0.11738	0.12979	-18	4	0.43879	0.36893	-5	9	0.64549	0.58646	8	20	0.68029	0.46688
YBL014C	9	101	0.79414	0.9144	13	65	0.84088	0.83708	-13	37	0.59995	0.88716	-26	18	0.21401	0.72477	-4	11	0.32701	0.2569
YBL014C	-11	54	0.62145	0.69213	-18	36	0.37744	0.58553	-23	26	0.29348	0.78926	-15	16	0.43217	0.69681	-6	28	0.26775	0.64501
YBL015W	-25	20	0.44211	0.34893	14	46	0.84663	0.69544	-5	16	0.80282	0.62502	-9	-15	0.5623	0.17869	-2	20	0.39175	0.46688
YBL015W	-24	20	0.45496	0.34893	-5	28	0.63014	0.48103	-10	15	0.68429	0.60303	-18	16	0.3652	0.69681	-2	19	0.39175	0.44062
YBL016W	7	55	0.78164	0.69982	-13	54	0.47516	0.76983	-18	12	0.43879	0.54125	-1	39	0.71855	0.89978	-3	21	0.35795	0.48812
YBL016W	3	69	0.74985	0.78921	-22	45	0.29799	0.68705	-13	41	0.59995	0.90984	12	32	0.88137	0.86181	-6	18	0.26775	0.41584
YBL018C	-18	50	0.5331	0.66069	4	35	0.76178	0.57323	-14	15	0.5661	0.60303	-1	32	0.71855	0.86181	-21	19	0.03688	0.44062
YBL018C	-8	40	0.65393	0.56947	-27	51	0.20406	0.74384	-16	10	0.50341	0.49794	-30	-5	0.15671	0.33517	-11	8	0.14786	0.19981
YBL019W	39	92	0.89317	0.88743	24	46	0.88997	0.69544	-10	56	0.68429	0.95794	-7	101	0.60326	0.97767	-5	29	0.29824	0.66693
YBL019W	51	89	0.91072	0.87837	22	47	0.88491	0.70452	-3	44	0.83462	0.92432	-15	55	0.43217	0.94223	-10	14	0.17001	0.32187
YBL021C	-26	30	0.42845	0.47114	-5	20	0.63014	0.35559	-18	17	0.43879	0.64246	-9	-41	0.5623	0.01438	-22	-8	0.03082	0.03322
YBL021C	-31	13	0.35903	0.26047	-19	41	0.35709	0.6483	-23	17	0.29348	0.64246	-34	-7	0.10723	0.2995	-20	16	0.04179	0.368
YBL023C	-38	16	0.25943	0.2981	-40	58	0.06932	0.79673	-33	10	0.1069	0.49794	16	36	0.9137	0.88654	-4	13	0.32701	0.29801
YBL023C	-38	50	0.25943	0.66069	-60	39	0.01264	0.62451	-14	18	0.5661	0.66115	-7	29	0.60326	0.84029	-3	17	0.35795	0.39301
YBL024W	7	44	0.78164	0.6078	0	60	0.70935	0.80961	2	44	0.89218	0.92432	33	213	0.9641	0.98849	8	37	0.68029	0.79812
YBL024W	5	52	0.765	0.67733	8	66	0.80351	0.84214	-4	48	0.81912	0.94141	25	206	0.9481	0.98814	8	6	0.68029	0.16499
YBL025W	-29	23	0.38726	0.38772	-15	37	0.43573	0.59933	-16	29	0.50341	0.82288	-11	-7	0.52376	0.2995	-9	-14	0.19079	0.01438
YBL025W	-45	15	0.18255	0.28605	10	36	0.81984	0.58553	-7	27	0.76065	0.80009	-29	45	0.17167	0.92164	-6	11	0.26775	0.2569
YBL026W	-48	28	0.15421	0.44899	-31	-27	0.1483	0.00609	-39	-27	0.05288	0.02416	50	14	0.97813	0.66586	42	80	0.97099	0.97956
YBL026W	-47	34	0.16201	0.51222	-23	-4	0.27891	0.07346	-43	17	0.03054	0.64246	85	-3	0.98584	0.37245	55	84	0.98024	0.98207
YBL030C	646	31	0.97349	0.48215	208	77	0.97171	0.88813	16	31	0.95976	0.84271	0	19	0.73443	0.73858	4	8	0.57033	0.19981
YBL030C	616	31	0.97314	0.48215	170	60	0.96861	0.80961	-10	29	0.68429	0.82288	29	13	0.95777	0.65044	-3	4	0.35795	0.13553
YBL031W	1	41	0.73482	0.5798	-16	53	0.41515	0.76086	-21	15	0.34864	0.60303	-9	-9	0.5623	0.26659	-6	-11	0.26775	0.02249
YBL031W	-16	45	0.5596	0.61767	-12	27	0.49701	0.46481	-18	27	0.43879	0.80009	-13	23	0.47831	0.78771	-43	-15	0.00365	0.01278
YBL032W	4501	3318	0.98818	0.99816	4402	3525	0.99356	0.99896	2849	3829	0.99566	0.99943	4592	45447	0.99758	0.99942	2378	19251	0.99657	0.99954
YBL032W	3829	3446	0.9876	0.99839	4515	3490	0.99367	0.99885	3055	3719	0.99589	0.99931	4704	45551	0.99769	0.99953	2304	17966	0.99646	0.99942
YBL033C	-14	33	0.58531	0.50327	-18	51	0.37744	0.74384	-19	22	0.40722	0.72965	-41	-12	0.04982	0.21988	-6	23	0.26775	0.53562
YBL033C	-10	56	0.63293	0.70808	-32	49	0.136	0.72579	4	49	0.91201	0.94346	-12	4	0.50017	0.50132	16	34	0.8334	0.75176
YBL036C	-10	29	0.63293	0.46058	-24	49	0.26109	0.72579	-9	39	0.71153	0.90027	-38	-3	0.07191	0.37245	17	26	0.84813	0.60687
YBL036C	-5	44	0.6841	0.6078	-8	40	0.57852	0.63612	-12	30	0.63095	0.83485	-43	13	0.03981	0.65044	4	24	0.57033	0.55811
YBL037W	7	93	0.78164	0.89064	-5	35	0.63014	0.57323	-26	46	0.22361	0.93332	-7	-7	0.60326	0.2995	-6	11	0.26775	0.2569
YBL037W	11	58	0.80631	0.72128	-1	38	0.69314	0.61243	-9	58	0.71153	0.96079	-17	-14	0.38626	0.19295	7	21	0.65528	0.48812
YBL039C	-23	23	0.46815	0.38772	-16	26	0.41515	0.44918	-7	22	0.76065	0.72965	-15	-9	0.43217	0.26659	-3	58	0.35795	0.95078
YBL039C	-8	13	0.65393	0.26047	-36	33	0.09795	0.54828	-7	30	0.76065	0.83485	1	22	0.75135	0.77413	25	44	0.9203	0.87588
YBL043W	-13	62	0.5969	0.74813	-20	36	0.33536	0.58553	-19	28	0.40722	0.81399	11	-17	0.87343	0.15406	0	11	0.45375	0.2569
YBL043W	1	87	0.73482	0.87137	3	94	0.74879	0.93711	-24	32	0.26817	0.85343	16	38	0.9137	0.89471	2	18	0.51427	0.41584
YBL046W	-16	22	0.5596	0.37555	-21	14	0.31708	0.26983	2	44	0.89218	0.92432	-2	15	0.70014	0.68012	9	22	0.70404	0.51301
YBL046W	-12	28	0.60917	0.44899	0	15	0.70935	0.28466	-10	23	0.68429	0.74675	0	36	0.73443	0.88654	-7	38	0.24195	0.80965
YBL047C	n	n	n	n	n	n	n	n	n	n	n	n	-3	25	0.683	0.8075	5	32	0.60059	0.71865
YBL047C	n	n	n	n	n	n	n	n	n	n	n	n	-34	13	0.10723	0.65044	-8	15	0.2174	0.3422
YBL048W	43	88	0.89879	0.87527	-12	24	0.49701	0.42044	-39	30	0.05288	0.83485	-5	50	0.64549	0.93153	-10	24	0.17001	0.55811
YBL048W	51	110	0.91072	0.9331	-4	40	0.64842	0.63612	-33	35	0.1069	0.87565	-30	2	0.15671	0.46404	-33	23	0.00776	0.53562
YBL049W	67	53	0.92564	0.68514	-13	41	0.47516	0.6483	-3	29	0.83462	0.82288	-8	-26	0.58405	0.06869	24	20	0.91459	0.46688
YBL049W	64	24	0.92369	0.40137	22	27	0.88491	0.46481	-1	46	0.86152	0.93332	-22	-35	0.28155	0.02842	13	43	0.78625	0.86526
YBL050W	1	108	0.73482	0.9292	-24	64	0.26109	0.83157	-33	31	0.1069	0.84271	-40	-52	0.0558	0.00333	7	21	0.65528	0.48812
YBL050W	-10	64	0.63293	0.76179	-21	53	0.31708	0.76086	-24	28	0.26817	0.81399	11	74	0.87343	0.96479	0	37	0.45375	0.79812
YBL055C	11	-3	0.80631	0.08353	10	7	0.81984	0.17613	-12	-4	0.63095	0.21461	40	45	0.97261	0.92164	-13	31	0.11224	0.70221
YBL055C	4	0	0.75857	0.10923	-5	-10	0.63014	0.03839	-9	-1	0.71153	0.26339	-31	69	0.14359	0.96041	11	41	0.74743	0.84391
YBL057C	83	127	0.93402	0.95479	-22	47	0.29799	0.70452	-8	5	0.73729	0.39012	0	21	0.73443	0.76182	1	33	0.48401	0.73361
YBL057C	64	152	0.92369	0.97211	-10	51	0.53977	0.74384	-3	25	0.83462	0.77672	-2	31	0.70014	0.85594	10	36	0.72539	0.78237
YBL058W	-11	60	0.62145	0.73585	-6	83	0.61335	0.90779	-5	51	0.80282	0.94814	-22	42	0.28155	0.9122	4	50	0.57033	0.91813
YBL058W	-21	57	0.49512	0.716	-9	56	0.5607	0.78351	8	78	0.93628	0.97834	-3	190	0.683	0.98768	37	9	0.96266	0.21705
YBL059W	17	118	0.83786	0.94446	-20	27	0.33536	0.46481	-24	18	0.26817	0.66115	-14	-5	0.45575	0.33517	2	35	0.51427	0.76729
YBL059W	58	136	0.91784	0.96282	-39	22	0.0753	0.38698	-22	7	0.31878	0.4372	-35	0	0.09676	0.42722	-3	29	0.35795	0.66693
YBL060W	-4	36	0.6942	0.5331	-5	56	0.63014	0.78351	-11	18	0.65819	0.66115	2	12	0.76734	0.63099	2	43	0.51427	0.86526
YBL060W	14	65	0.82226	0.76718	-13	57	0.47516	0.78972	-6	26	0.78185	0.78926	-47	22	0.0245	0.77413	5	34	0.60059	0.75176
YBL061C	26	149	0.86299	0.96993	-3	71	0.66383	0.86548	-24	14	0.26817	0.58297	-24	-6	0.24657	0.31722	-7	6	0.24195	0.16499
YBL061C	14	143	0.82226	0.96683	-1	93	0.69314	0.934	-24	16	0.26817	0.62502	-36	-15	0.08767	0.17869	-8	19	0.2174	0.44062
YBL062W	-32	13	0.34411	0.26047	-34	40	0.11738	0.63612	-13	21	0.59995	0.71176	-25	-29	0.22989	0.05315	7	30	0.65528	0.6852
YBL062W	-7	52	0.66494	0.67733	-20	34	0.33536	0.56173	-8	25	0.73729	0.77672	-8	2	0.58405	0.46404	-6	16	0.26775	0.368
YBL063W	-81	20	0.03947	0.34893	-32	12	0.136	0.24085	-41	-22	0.04103	0.03989	-16	-5	0.40835	0.33517	-5	-1	0.29824	0.07387
YBL063W	-101	15	0.02019	0.28605	-25	11	0.24005	0.22545	-37	-22	0.06861	0.03989	-8	-12	0.58405	0.21988	0	-3	0.45375	0.05948
YBL064C	2121	161	0.98405	0.97532	530	107	0.98171	0.95642	16	28	0.95976	0.81399	-12	70	0.50017	0.96133	19	62	0.87303	0.9598
YBL064C	2305	195	0.98508	0.98175	453	110	0.98011	0.95976	35	74	0.97595	0.97606	6	25	0.8228	0.8075	19	48	0.87303	0.905
YBL065W	66	145	0.92507	0.96798	-2	62	0.67808	0.82087	-15	44	0.53624	0.92432	-16	25	0.40835	0.8075	5	13	0.60059	0.29801
YBL065W	57	170	0.91658	0.97785	-22	19	0.29799	0.34053	-18	47	0.43879	0.93708	-8	-5	0.58405	0.33517	17	26	0.84813	0.60687
YBL066C	13	121	0.81721	0.94847	18	91	0.8679	0.92975	-8	33	0.73729	0.86015	-6	-22	0.62581	0.1009	-1	18	0.42543	0.41584
YBL066C	20	117	0.84578	0.94228	1	93	0.72441	0.934	-13	25	0.59995	0.77672	-15	-20	0.43217	0.11839	-9	29	0.19079	0.66693
YBL067C	64	117	0.92369	0.94228	-15	32	0.43573	0.53541	-13	21	0.59995	0.71176	-21	-2	0.30065	0.38948	-9	20	0.19079	0.46688
YBL067C	56	167	0.91612	0.9767	6	93	0.7827	0.934	-4	19	0.81912	0.67836	-49	22	0.02002	0.77413	-9	2	0.19079	0.10812
YBL069W	27	101	0.86586	0.9144	-19	35	0.35709	0.57323	-4	24	0.81912	0.76179	-28	47	0.18616	0.92578	8	6	0.68029	0.16499
YBL069W	43	134	0.89879	0.96121	-11	38	0.51954	0.61243	-6	19	0.78185	0.67836	-18	-15	0.3652	0.17869	-20	26	0.04179	0.60687
YBL070C	-85	9	0.0358	0.21113	-7	31	0.59611	0.52379	-21	-8	0.34864	0.15614	19	-26	0.92831	0.06869	8	56	0.68029	0.94427
YBL070C	-83	-6	0.03752	0.05874	4	50	0.76178	0.73419	-14	-1	0.5661	0.26339	-11	-1	0.52376	0.40789	0	43	0.45375	0.86526
YBL073W	45	125	0.90246	0.95272	6	107	0.7827	0.95642	21	98	0.96717	0.98506	-35	-45	0.09676	0.00978	-2	23	0.39175	0.53562
YBL073W	48	112	0.90648	0.9362	-10	70	0.53977	0.86088	-7	37	0.76065	0.88716	-5	-2	0.64549	0.38948	-4	20	0.32701	0.46688
YBL074C	-22	37	0.4825	0.54297	-20	4	0.33536	0.13968	-10	-6	0.68429	0.18589	-27	15	0.19951	0.68012	12	15	0.76729	0.3422
YBL074C	-28	40	0.4008	0.56947	-22	29	0.29799	0.49494	-28	6	0.1852	0.416	-3	42	0.683	0.9122	15	21	0.81947	0.48812
YBL075C	51	138	0.91072	0.96442	72	140	0.95274	0.9793	-9	43	0.71153	0.92056	-6	5	0.62581	0.51846	-8	21	0.2174	0.48812
YBL075C	38	109	0.89122	0.93184	-44	30	0.05035	0.50862	-12	21	0.63095	0.71176	3	12	0.78414	0.63099	17	33	0.84813	0.73361
YBL078C	48	122	0.90648	0.94962	10	70	0.81984	0.86088	-11	55	0.65819	0.95634	-10	18	0.54286	0.72477	-2	31	0.39175	0.70221
YBL078C	31	104	0.87584	0.92197	3	100	0.74879	0.94665	-14	15	0.5661	0.60303	-6	-9	0.62581	0.26659	-8	27	0.2174	0.62537
YBL080C	23	45	0.85381	0.61767	-2	20	0.67808	0.35559	-7	44	0.76065	0.92432	-19	1	0.34115	0.44379	-16	2	0.07456	0.10812
YBL080C	-12	59	0.60917	0.72782	7	55	0.79294	0.77696	-11	23	0.65819	0.74675	-43	15	0.03981	0.68012	0	12	0.45375	0.27574
YBL082C	38	0	0.89122	0.10923	-4	12	0.64842	0.24085	-13	-9	0.59995	0.14315	-54	13	0.01116	0.65044	-25	43	0.01963	0.86526
YBL082C	7	-3	0.78164	0.08353	27	43	0.89951	0.67038	-7	1	0.76065	0.30396	-91	51	0.00092	0.93395	89	49	0.98846	0.91208
YBL084C	78	21	0.93195	0.36247	8	3	0.80351	0.12979	-30	-23	0.15272	0.03521	-10	18	0.54286	0.72477	-1	28	0.42543	0.64501
YBL084C	73	31	0.92954	0.48215	8	8	0.80351	0.18808	-41	-17	0.04103	0.06918	15	8	0.90657	0.56943	7	41	0.65528	0.84391
YBL085W	-95	43	0.02558	0.59988	-8	22	0.57852	0.38698	-33	-29	0.1069	0.01766	-3	13	0.683	0.65044	-6	17	0.26775	0.39301
YBL085W	-104	28	0.01824	0.44899	-25	11	0.24005	0.22545	-23	33	0.29348	0.86015	-8	10	0.58405	0.60142	-18	7	0.05549	0.18291
YBL086C	-14	24	0.58531	0.40137	-11	39	0.51954	0.62451	-5	27	0.80282	0.80009	-58	-17	0.00759	0.15406	-2	10	0.39175	0.23544
YBL086C	8	48	0.78852	0.64566	14	60	0.84663	0.80961	-2	25	0.84921	0.77672	-8	-33	0.58405	0.03543	-8	13	0.2174	0.29801
YBL089W	5	85	0.765	0.86494	-4	11	0.64842	0.22545	-22	17	0.31878	0.64246	-11	17	0.52376	0.71085	-28	16	0.01381	0.368
YBL089W	9	79	0.79414	0.84325	-20	-5	0.33536	0.06783	-39	-1	0.05288	0.26339	-21	-4	0.30065	0.35254	0	21	0.45375	0.48812
YBL090W	-14	52	0.58531	0.67733	-66	4	0.00862	0.13968	-30	24	0.15272	0.76179	0	-18	0.73443	0.14129	6	35	0.62811	0.76729
YBL090W	-13	59	0.5969	0.72782	-15	22	0.43573	0.38698	-32	7	0.12149	0.4372	-21	-38	0.30065	0.02048	17	26	0.84813	0.60687
YBL091C-A	14	66	0.82226	0.77292	12	51	0.83329	0.74384	-13	45	0.59995	0.9291	-30	-20	0.15671	0.11839	-4	21	0.32701	0.48812
YBL091C-A	-15	29	0.57292	0.46058	-7	63	0.59611	0.82593	-28	35	0.1852	0.87565	-11	-38	0.52376	0.02048	8	21	0.68029	0.48812
YBL093C	-23	43	0.46815	0.59988	-21	54	0.31708	0.76983	-6	35	0.78185	0.87565	-21	1	0.30065	0.44379	-1	25	0.42543	0.58346
YBL093C	-15	50	0.57292	0.66069	21	92	0.881	0.93182	-11	7	0.65819	0.4372	-12	11	0.50017	0.61592	-12	22	0.12765	0.51301
YBL094C	0	56	0.72851	0.70808	-7	17	0.59611	0.31352	-26	22	0.22361	0.72965	0	2	0.73443	0.46404	3	30	0.54224	0.6852
YBL094C	-16	17	0.5596	0.30866	-5	29	0.63014	0.49494	-6	40	0.78185	0.9046	-56	-8	0.00908	0.28374	9	39	0.70404	0.82153
YBL095W	-28	59	0.4008	0.72782	-24	33	0.26109	0.54828	-44	-20	0.02712	0.05071	0	-5	0.73443	0.33517	18	40	0.86138	0.83295
YBL095W	-38	70	0.25943	0.79483	-40	0	0.06932	0.10312	-32	-9	0.12149	0.14315	-3	12	0.683	0.63099	1	32	0.48401	0.71865
YBL096C	99	88	0.93884	0.87527	59	32	0.94515	0.53541	-17	34	0.47059	0.86927	-17	-5	0.38626	0.33517	3	17	0.54224	0.39301
YBL096C	36	62	0.88743	0.74813	47	82	0.93435	0.9048	-21	1	0.34864	0.30396	-31	10	0.14359	0.60142	-7	14	0.24195	0.32187
YBL097W	-20	29	0.50877	0.46058	-20	63	0.33536	0.82593	2	56	0.89218	0.95794	-9	-16	0.5623	0.16741	-9	3	0.19079	0.1208
YBL097W	-1	26	0.72105	0.42558	0	48	0.70935	0.71545	-14	27	0.5661	0.80009	-20	11	0.32067	0.61592	12	26	0.76729	0.60687
YBL098W	12	26	0.81273	0.42558	-15	14	0.43573	0.26983	-7	30	0.76065	0.83485	-48	-15	0.02289	0.17869	2	48	0.51427	0.905
YBL098W	6	34	0.77349	0.51222	-7	3	0.59611	0.12979	-7	30	0.76065	0.83485	-6	-21	0.62581	0.11011	10	24	0.72539	0.55811
YBL100C	12	37	0.81273	0.54297	2	41	0.73925	0.6483	-16	18	0.50341	0.66115	-43	-6	0.03981	0.31722	-42	-22	0.00388	0.00536
YBL100C	14	50	0.82226	0.66069	-5	47	0.63014	0.70452	-8	28	0.73729	0.81399	-6	-14	0.62581	0.19295	6	15	0.62811	0.3422
YBL102W	7	33	0.78164	0.50327	16	40	0.85858	0.63612	-13	17	0.59995	0.64246	-38	5	0.07191	0.51846	3	11	0.54224	0.2569
YBL102W	-21	11	0.49512	0.23442	1	35	0.72441	0.57323	-10	7	0.68429	0.4372	-27	-9	0.19951	0.26659	-5	33	0.29824	0.73361
YBL103C	-11	35	0.62145	0.52208	-34	30	0.11738	0.50862	-17	29	0.47059	0.82288	-2	13	0.70014	0.65044	-6	27	0.26775	0.62537
YBL103C	-35	42	0.29925	0.58875	-7	37	0.59611	0.59933	-13	31	0.59995	0.84271	3	22	0.78414	0.77413	-7	2	0.24195	0.10812
YBL104C	11	102	0.80631	0.91669	0	30	0.70935	0.50862	-4	48	0.81912	0.94141	3	17	0.78414	0.71085	-14	37	0.09796	0.79812
YBL104C	-8	75	0.65393	0.82099	-9	37	0.5607	0.59933	-11	29	0.65819	0.82288	-35	13	0.09676	0.65044	-2	23	0.39175	0.53562
YBL105C	-37	-11	0.27148	0.02925	11	48	0.82674	0.71545	-19	6	0.40722	0.416	-21	-15	0.30065	0.17869	-5	9	0.29824	0.21705
YBL105C	-31	19	0.35903	0.33803	-6	79	0.61335	0.89583	-23	8	0.29348	0.45965	11	-33	0.87343	0.03543	-11	12	0.14786	0.27574
YBL106C	-17	36	0.54652	0.5331	-2	57	0.67808	0.78972	-12	5	0.63095	0.39012	n	n	n	n	144	31	0.99052	0.70221
YBL106C	-75	-7	0.04761	0.05197	-50	25	0.02736	0.43504	-17	13	0.47059	0.56371	n	n	n	n	n	n	n	n
YBL108W	-54	0	0.11405	0.10923	-4	15	0.64842	0.28466	-12	13	0.63095	0.56371	-20	-16	0.32067	0.16741	-14	-11	0.09796	0.02249
YBL108W	-53	-5	0.12002	0.06804	-16	17	0.41515	0.31352	-20	-4	0.37679	0.21461	-17	1	0.38626	0.44379	1	2	0.48401	0.10812
YBL109W	-33	5	0.33	0.16442	-18	14	0.37744	0.26983	-37	-7	0.06861	0.16981	-20	-6	0.32067	0.31722	-14	7	0.09796	0.18291
YBL109W	9	14	0.79414	0.27366	15	22	0.85341	0.38698	-21	-16	0.34864	0.07829	-18	-13	0.3652	0.20642	-7	3	0.24195	0.1208
YBR001C	-25	21	0.44211	0.36247	2	68	0.73925	0.85191	-24	24	0.26817	0.76179	-20	-2	0.32067	0.38948	10	42	0.72539	0.85476
YBR001C	-32	20	0.34411	0.34893	-1	67	0.69314	0.8464	-18	7	0.43879	0.4372	1	15	0.75135	0.68012	-18	-11	0.05549	0.02249
YBR003W	-24	16	0.45496	0.2981	14	82	0.84663	0.9048	-4	18	0.81912	0.66115	-16	22	0.40835	0.77413	2	-3	0.51427	0.05948
YBR003W	-22	29	0.4825	0.46058	33	106	0.91457	0.95504	-14	31	0.5661	0.84271	5	20	0.81003	0.74962	-12	-1	0.12765	0.07387
YBR004C	-5	32	0.6841	0.4942	-23	27	0.27891	0.46481	-14	35	0.5661	0.87565	-10	2	0.54286	0.46404	-15	8	0.0862	0.19981
YBR004C	-8	31	0.65393	0.48215	-7	26	0.59611	0.44918	-14	35	0.5661	0.87565	-26	-4	0.21401	0.35254	1	20	0.48401	0.46688
YBR005W	-3	24	0.70361	0.40137	-3	29	0.66383	0.49494	-31	-16	0.1338	0.07829	8	8	0.84501	0.56943	16	21	0.8334	0.48812
YBR005W	-38	0	0.25943	0.10923	4	34	0.76178	0.56173	-9	-10	0.71153	0.13289	-20	10	0.32067	0.60142	28	21	0.93514	0.48812
YBR006W	-25	21	0.44211	0.36247	3	88	0.74879	0.92239	-20	19	0.37679	0.67836	-23	6	0.26326	0.53549	5	12	0.60059	0.27574
YBR006W	-31	19	0.35903	0.33803	5	145	0.77316	0.98171	-17	1	0.47059	0.30396	-17	-18	0.38626	0.14129	-1	-1	0.42543	0.07387
YBR010W	-26	8	0.42845	0.19988	13	88	0.84088	0.92239	-17	9	0.47059	0.47754	15	60	0.90657	0.95132	-7	35	0.24195	0.76729
YBR010W	-37	26	0.27148	0.42558	12	101	0.83329	0.9478	-14	47	0.5661	0.93708	-16	78	0.40835	0.96732	-18	-1	0.05549	0.07387
YBR011C	-4	29	0.6942	0.46058	-15	32	0.43573	0.53541	5	19	0.91907	0.67836	-9	-1	0.5623	0.40789	9	19	0.70404	0.44062
YBR011C	-14	17	0.58531	0.30866	-10	19	0.53977	0.34053	2	21	0.89218	0.71176	-12	7	0.50017	0.55091	0	37	0.45375	0.79812
YBR012C	-6	-12	0.67527	0.02581	-16	-19	0.41515	0.01517	1	9	0.88203	0.47754	-69	-9	0.00264	0.26659	7	14	0.65528	0.32187
YBR012C	-3	1	0.70361	0.12002	-10	4	0.53977	0.13968	-2	-5	0.84921	0.2007	-12	-10	0.50017	0.2491	6	17	0.62811	0.39301
YBR014C	21	66	0.84922	0.77292	-3	56	0.66383	0.78351	-21	60	0.34864	0.96375	4	33	0.79772	0.86848	-2	3	0.39175	0.1208
YBR014C	10	61	0.80045	0.74216	-5	73	0.63014	0.87249	-24	53	0.26817	0.95258	-12	28	0.50017	0.8327	-6	8	0.26775	0.19981
YBR015C	-33	4	0.33	0.15364	-23	87	0.27891	0.9194	-34	19	0.09528	0.67836	-15	27	0.43217	0.82533	-18	-13	0.05549	0.01587
YBR015C	-49	24	0.14733	0.40137	4	82	0.76178	0.9048	-17	1	0.47059	0.30396	-14	1	0.45575	0.44379	-8	-1	0.2174	0.07387
YBR018C	11	74	0.80631	0.81594	6	48	0.7827	0.71545	-32	21	0.12149	0.71176	16	11	0.9137	0.61592	-8	4	0.2174	0.13553
YBR018C	15	79	0.82788	0.84325	-2	44	0.67808	0.679	-19	37	0.40722	0.88716	-16	42	0.40835	0.9122	-3	-9	0.35795	0.02911
YBR019C	5	5	0.765	0.16442	17	-1	0.86261	0.09484	7	-2	0.93104	0.24549	19	22	0.92831	0.77413	-9	16	0.19079	0.368
YBR019C	12	11	0.81273	0.23442	-7	2	0.59611	0.12002	-11	-17	0.65819	0.06918	-11	23	0.52376	0.78771	-15	24	0.0862	0.55811
YBR021W	164	46	0.95215	0.62685	91	12	0.95907	0.24085	5	41	0.91907	0.90984	8	21	0.84501	0.76182	-8	3	0.2174	0.1208
YBR021W	159	42	0.95123	0.58875	87	52	0.95803	0.75293	13	23	0.95361	0.74675	-39	12	0.06385	0.63099	-10	-12	0.17001	0.01906
YBR022W	-37	-1	0.27148	0.09959	34	136	0.91687	0.97781	-29	9	0.16822	0.47754	0	-8	0.73443	0.28374	-4	-12	0.32701	0.01906
YBR022W	-35	9	0.29925	0.21113	18	118	0.8679	0.96608	-28	-17	0.1852	0.06918	-27	54	0.19951	0.93993	-4	-3	0.32701	0.05948
YBR024W	-39	4	0.24555	0.15364	6	88	0.7827	0.92239	-21	18	0.34864	0.66115	-14	36	0.45575	0.88654	-17	-13	0.06474	0.01587
YBR024W	-24	4	0.45496	0.15364	69	214	0.9509	0.99206	-31	11	0.1338	0.5188	14	27	0.89828	0.82533	-14	2	0.09796	0.10812
YBR025C	-5	39	0.6841	0.56087	-13	52	0.47516	0.75293	-8	56	0.73729	0.95794	-7	28	0.60326	0.8327	8	34	0.68029	0.75176
YBR025C	-11	33	0.62145	0.50327	-15	53	0.43573	0.76086	-10	55	0.68429	0.95634	-5	22	0.64549	0.77413	12	38	0.76729	0.80965
YBR027C	26	83	0.86299	0.85783	-17	47	0.39526	0.70452	-22	41	0.31878	0.90984	-29	-8	0.17167	0.28374	6	30	0.62811	0.6852
YBR027C	10	101	0.80045	0.9144	-15	47	0.43573	0.70452	-3	32	0.83462	0.85343	5	-10	0.81003	0.2491	13	36	0.78625	0.78237
YBR028C	-8	43	0.65393	0.59988	-21	44	0.31708	0.679	-7	47	0.76065	0.93708	-22	20	0.28155	0.74962	2	41	0.51427	0.84391
YBR028C	-6	27	0.67527	0.4366	-2	49	0.67808	0.72579	-23	37	0.29348	0.88716	-9	20	0.5623	0.74962	14	45	0.80269	0.88513
YBR029C	68	24	0.92633	0.40137	-21	5	0.31708	0.15118	-14	-1	0.5661	0.26339	n	n	n	n	n	n	n	n
YBR029C	-6	2	0.67527	0.13115	-32	14	0.136	0.26983	-13	-4	0.59995	0.21461	n	n	n	n	n	n	n	n
YBR031W	47	99	0.90499	0.90935	-4	53	0.64842	0.76086	-7	47	0.76065	0.93708	-22	38	0.28155	0.89471	-7	43	0.24195	0.86526
YBR031W	49	112	0.90797	0.9362	-18	36	0.37744	0.58553	-6	42	0.78185	0.91565	9	28	0.8549	0.8327	34	38	0.95569	0.80965
YBR032W	16	98	0.83281	0.90567	-20	22	0.33536	0.38698	-14	-6	0.5661	0.18589	-23	-7	0.26326	0.2995	6	44	0.62811	0.87588
YBR032W	-10	51	0.63293	0.66873	-2	63	0.67808	0.82593	-26	-2	0.22361	0.24549	-16	-29	0.40835	0.05315	4	47	0.57033	0.89883
YBR033W	-23	32	0.46815	0.4942	-6	26	0.61335	0.44918	-25	4	0.24515	0.36893	-22	-50	0.28155	0.00483	22	15	0.89849	0.3422
YBR033W	-18	6	0.5331	0.17636	-28	40	0.18889	0.63612	-24	11	0.26817	0.5188	-5	-11	0.64549	0.23392	-14	18	0.09796	0.41584
YBR034C	19	97	0.84337	0.90304	-26	34	0.22372	0.56173	-7	25	0.76065	0.77672	12	7	0.88137	0.55091	20	19	0.88422	0.44062
YBR034C	45	143	0.90246	0.96683	-18	32	0.37744	0.53541	-24	34	0.26817	0.86927	7	-16	0.83396	0.16741	10	24	0.72539	0.55811
YBR035C	914	93	0.97682	0.89064	366	16	0.97804	0.29972	2	68	0.89218	0.97139	11	24	0.87343	0.79726	24	56	0.91459	0.94427
YBR035C	605	61	0.97269	0.74216	262	37	0.97447	0.59933	18	91	0.96284	0.98313	3	2	0.78414	0.46404	32	54	0.94998	0.93697
YBR036C	-5	17	0.6841	0.30866	-20	30	0.33536	0.50862	-10	13	0.68429	0.56371	9	3	0.8549	0.48256	-6	36	0.26775	0.78237
YBR036C	-15	10	0.57292	0.2226	-14	59	0.45504	0.80363	-13	1	0.59995	0.30396	-34	15	0.10723	0.68012	12	50	0.76729	0.91813
YBR037C	11	120	0.80631	0.94767	-26	20	0.22372	0.35559	-37	11	0.06861	0.5188	-25	-25	0.22989	0.07513	-3	27	0.35795	0.62537
YBR037C	-9	80	0.6436	0.84704	33	96	0.91457	0.94044	-26	9	0.22361	0.47754	-53	-25	0.01288	0.07513	-12	33	0.12765	0.73361
YBR038W	-36	12	0.28537	0.24658	-3	63	0.66383	0.82593	-20	-6	0.37679	0.18589	13	-5	0.88931	0.33517	-2	18	0.39175	0.41584
YBR038W	-64	-6	0.07114	0.05874	-3	29	0.66383	0.49494	-18	7	0.43879	0.4372	-10	-12	0.54286	0.21988	-9	11	0.19079	0.2569
YBR039W	3	-5	0.74985	0.06804	-10	14	0.53977	0.26983	9	-10	0.94118	0.13289	n	n	n	n	0	25	0.45375	0.58346
YBR039W	8	6	0.78852	0.17636	-17	23	0.39526	0.40388	-4	25	0.81912	0.77672	n	n	n	n	-4	36	0.32701	0.78237
YBR041W	110	59	0.9417	0.72782	13	25	0.84088	0.43504	-5	-8	0.80282	0.15614	-13	3	0.47831	0.48256	2	15	0.51427	0.3422
YBR041W	100	77	0.9393	0.83488	0	11	0.70935	0.22545	-18	-11	0.43879	0.12149	-8	-40	0.58405	0.01633	-23	3	0.02626	0.1208
YBR042C	109	125	0.94113	0.95272	-1	90	0.69314	0.92756	10	40	0.94586	0.9046	-17	39	0.38626	0.89978	9	31	0.70404	0.70221
YBR042C	131	150	0.94698	0.97062	0	67	0.70935	0.8464	8	41	0.93628	0.90984	-3	37	0.683	0.89034	22	42	0.89849	0.85476
YBR043C	3	8	0.74985	0.19988	0	23	0.70935	0.40388	6	9	0.92523	0.47754	n	n	n	n	4	51	0.57033	0.92498
YBR043C	5	-4	0.765	0.07596	-8	18	0.57852	0.32754	8	1	0.93628	0.30396	n	n	n	n	34	43	0.95569	0.86526
YBR044C	67	141	0.92564	0.9658	-27	40	0.20406	0.63612	-7	8	0.76065	0.45965	7	18	0.83396	0.72477	7	21	0.65528	0.48812
YBR044C	45	101	0.90246	0.9144	1	37	0.72441	0.59933	-7	12	0.76065	0.54125	2	12	0.76734	0.63099	19	35	0.87303	0.76729
YBR045C	24	-3	0.85702	0.08353	-6	14	0.61335	0.26983	-14	-6	0.5661	0.18589	-20	-10	0.32067	0.2491	5	30	0.60059	0.6852
YBR045C	-2	-7	0.71244	0.05197	3	-1	0.74879	0.09484	-3	18	0.83462	0.66115	-25	-38	0.22989	0.02048	-3	34	0.35795	0.75176
YBR048W	5	59	0.765	0.72782	-19	41	0.35709	0.6483	-20	16	0.37679	0.62502	-20	-10	0.32067	0.2491	10	22	0.72539	0.51301
YBR048W	9	98	0.79414	0.90567	-21	26	0.31708	0.44918	-22	11	0.31878	0.5188	4	47	0.79772	0.92578	-1	7	0.42543	0.18291
YBR050C	-8	101	0.65393	0.9144	-14	27	0.45504	0.46481	-24	9	0.26817	0.47754	24	45	0.945	0.92164	9	26	0.70404	0.60687
YBR050C	-22	75	0.4825	0.82099	-30	30	0.16153	0.50862	-15	-5	0.53624	0.2007	-9	60	0.5623	0.95132	15	26	0.81947	0.60687
YBR052C	-9	-5	0.6436	0.06804	-1	11	0.69314	0.22545	18	-10	0.96284	0.13289	-1	43	0.71855	0.91612	9	19	0.70404	0.44062
YBR052C	0	5	0.72851	0.16442	-7	24	0.59611	0.42044	-2	7	0.84921	0.4372	-19	64	0.34115	0.9557	16	44	0.8334	0.87588
YBR053C	-14	83	0.58531	0.85783	-37	46	0.09048	0.69544	-9	15	0.71153	0.60303	-14	-9	0.45575	0.26659	3	30	0.54224	0.6852
YBR053C	6	100	0.77349	0.91187	-14	69	0.45504	0.8572	2	32	0.89218	0.85343	6	-2	0.8228	0.38948	-1	29	0.42543	0.66693
YBR055C	71	161	0.92816	0.97532	48	119	0.9355	0.96746	-1	60	0.86152	0.96375	n	n	n	n	14	29	0.80269	0.66693
YBR055C	63	128	0.92254	0.95559	11	48	0.82674	0.71545	-5	40	0.80282	0.9046	n	n	n	n	14	23	0.80269	0.53562
YBR057C	61	167	0.92094	0.9767	9	70	0.81248	0.86088	4	20	0.91201	0.69591	-26	-19	0.21401	0.12748	-8	24	0.2174	0.55811
YBR057C	24	120	0.85702	0.94767	-10	34	0.53977	0.56173	-24	6	0.26817	0.416	-54	-5	0.01116	0.33517	-11	0	0.14786	0.08495
YBR058C	29	108	0.87022	0.9292	-1	134	0.69314	0.97689	-21	23	0.34864	0.74675	-19	48	0.34115	0.92739	-12	34	0.12765	0.75176
YBR058C	61	169	0.92094	0.97751	-12	79	0.49701	0.89583	-9	31	0.71153	0.84271	6	40	0.8228	0.90369	11	28	0.74743	0.64501
YBR059C	10	118	0.80045	0.94446	48	118	0.9355	0.96608	-30	12	0.15272	0.54125	-27	19	0.19951	0.73858	-11	20	0.14786	0.46688
YBR059C	9	96	0.79414	0.9004	94	1407	0.95976	0.99781	-26	15	0.22361	0.60303	-23	-15	0.26326	0.17869	0	21	0.45375	0.48812
YBR060C	-24	56	0.45496	0.70808	-38	22	0.08208	0.38698	-21	10	0.34864	0.49794	-14	6	0.45575	0.53549	-8	0	0.2174	0.08495
YBR060C	-24	55	0.45496	0.69982	-12	22	0.49701	0.38698	-28	25	0.1852	0.77672	22	11	0.94016	0.61592	6	8	0.62811	0.19981
YBR061C	57	150	0.91658	0.97062	21	95	0.881	0.93883	-2	35	0.84921	0.87565	-23	62	0.26326	0.95397	-7	28	0.24195	0.64501
YBR061C	72	147	0.92885	0.96855	-11	47	0.51954	0.70452	-8	36	0.73729	0.88226	-30	53	0.15671	0.9374	9	13	0.70404	0.29801
YBR064W	6	36	0.77349	0.5331	-25	-15	0.24005	0.02345	-8	68	0.73729	0.97139	-9	60	0.5623	0.95132	7	21	0.65528	0.48812
YBR064W	-3	64	0.70361	0.76179	-12	30	0.49701	0.50862	-21	45	0.34864	0.9291	-3	37	0.683	0.89034	3	5	0.54224	0.14912
YBR067C	-7	38	0.66494	0.55261	-17	57	0.39526	0.78972	-8	20	0.73729	0.69591	-26	-11	0.21401	0.23392	3	14	0.54224	0.32187
YBR067C	-6	46	0.67527	0.62685	-3	63	0.66383	0.82593	3	25	0.90289	0.77672	-19	-3	0.34115	0.37245	-9	3	0.19079	0.1208
YBR068C	133	54	0.94744	0.69213	0	32	0.70935	0.53541	-8	13	0.73729	0.56371	-15	-11	0.43217	0.23392	11	18	0.74743	0.41584
YBR068C	104	38	0.93998	0.55261	178	474	0.96999	0.99574	-11	1	0.65819	0.30396	19	5	0.92831	0.51846	-4	15	0.32701	0.3422
YBR069C	10	27	0.80045	0.4366	-4	46	0.64842	0.69544	-10	40	0.68429	0.9046	-10	8	0.54286	0.56943	-7	20	0.24195	0.46688
YBR069C	26	56	0.86299	0.70808	-8	54	0.57852	0.76983	-12	16	0.63095	0.62502	18	-8	0.92336	0.28374	0	11	0.45375	0.2569
YBR071W	-12	35	0.60917	0.52208	5	46	0.77316	0.69544	-15	32	0.53624	0.85343	21	-7	0.93683	0.2995	-2	11	0.39175	0.2569
YBR071W	-4	33	0.6942	0.50327	-6	29	0.61335	0.49494	-21	22	0.34864	0.72965	-20	-1	0.32067	0.40789	9	17	0.70404	0.39301
YBR072W	-10	40	0.63293	0.56947	12	29	0.83329	0.49494	0	37	0.87166	0.88716	-31	0	0.14359	0.42722	-13	19	0.11224	0.44062
YBR072W	5	38	0.765	0.55261	-14	11	0.45504	0.22545	-12	22	0.63095	0.72965	8	0	0.84501	0.42722	2	25	0.51427	0.58346
YBR074W	-4	10	0.6942	0.2226	4	46	0.76178	0.69544	-15	13	0.53624	0.56371	1	15	0.75135	0.68012	1	14	0.48401	0.32187
YBR074W	-7	35	0.66494	0.52208	1	46	0.72441	0.69544	-23	23	0.29348	0.74675	15	23	0.90657	0.78771	-10	5	0.17001	0.14912
YBR075W	-21	38	0.49512	0.55261	-27	18	0.20406	0.32754	-17	-5	0.47059	0.2007	13	34	0.88931	0.87504	-12	9	0.12765	0.21705
YBR075W	10	70	0.80045	0.79483	-29	21	0.17475	0.371	-11	8	0.65819	0.45965	5	25	0.81003	0.8075	-4	2	0.32701	0.10812
YBR076W	113	51	0.94239	0.66873	29	95	0.90411	0.93883	-13	-1	0.59995	0.26339	-5	32	0.64549	0.86181	-5	7	0.29824	0.18291
YBR076W	136	47	0.94802	0.63614	6	37	0.7827	0.59933	-7	-16	0.76065	0.07829	-20	1	0.32067	0.44379	-6	1	0.26775	0.09648
YBR078W	-14	45	0.58531	0.61767	-26	24	0.22372	0.42044	-22	18	0.31878	0.66115	-39	24	0.06385	0.79726	-1	25	0.42543	0.58346
YBR078W	3	75	0.74985	0.82099	0	29	0.70935	0.49494	-19	24	0.40722	0.76179	-1	15	0.71855	0.68012	26	21	0.92646	0.48812
YBR079C	-27	38	0.41422	0.55261	-3	67	0.66383	0.8464	2	52	0.89218	0.95007	2	-13	0.76734	0.20642	-3	22	0.35795	0.51301
YBR079C	-19	31	0.52117	0.48215	14	64	0.84663	0.83157	-6	16	0.78185	0.62502	-16	2	0.40835	0.46404	-4	31	0.32701	0.70221
YBR080C	74	108	0.93023	0.9292	-6	53	0.61335	0.76086	-10	41	0.68429	0.90984	67	24	0.98377	0.79726	16	9	0.8334	0.21705
YBR080C	145	134	0.94928	0.96121	15	45	0.85341	0.68705	-1	46	0.86152	0.93332	-2	14	0.70014	0.66586	2	3	0.51427	0.1208
YBR082C	-26	38	0.42845	0.55261	-9	46	0.5607	0.69544	-18	5	0.43879	0.39012	-5	15	0.64549	0.68012	9	15	0.70404	0.3422
YBR082C	-29	15	0.38726	0.28605	-30	40	0.16153	0.63612	-22	21	0.31878	0.71176	-8	8	0.58405	0.56943	12	14	0.76729	0.32187
YBR084C-A	-38	30	0.25943	0.47114	-6	64	0.61335	0.83157	-6	12	0.78185	0.54125	-9	27	0.5623	0.82533	93	93	0.98903	0.98492
YBR084C-A	-32	35	0.34411	0.52208	-8	13	0.57852	0.255	-29	27	0.16822	0.80009	15	60	0.90657	0.95132	192	176	0.99132	0.99052
YBR085W	n	n	n	n	n	n	n	n	-116	-16	0.00056	0.07829	n	n	n	n	n	n	n	n
YBR085W	n	n	n	n	n	n	n	n	-388	-24	0	0.03202	-86	-48	0.00126	0.00655	-29	19	0.0121	0.44062
YBR086C	-20	25	0.50877	0.41296	30	107	0.90653	0.95642	-27	-2	0.20344	0.24549	-17	-1	0.38626	0.40789	-3	5	0.35795	0.14912
YBR086C	-12	19	0.60917	0.33803	21	85	0.881	0.91354	-19	28	0.40722	0.81399	-1	6	0.71855	0.53549	-3	12	0.35795	0.27574
YBR087W	-18	28	0.5331	0.44899	-4	60	0.64842	0.80961	-21	3	0.34864	0.34488	20	8	0.93314	0.56943	-8	30	0.2174	0.6852
YBR087W	-32	20	0.34411	0.34893	-20	47	0.33536	0.70452	-10	40	0.68429	0.9046	-8	-5	0.58405	0.33517	0	3	0.45375	0.1208
YBR088C	5	73	0.765	0.81055	-9	22	0.5607	0.38698	-2	42	0.84921	0.91565	-61	20	0.00529	0.74962	-11	15	0.14786	0.3422
YBR088C	-13	36	0.5969	0.5331	10	76	0.81984	0.88457	-12	22	0.63095	0.72965	-44	2	0.0352	0.46404	7	4	0.65528	0.13553
YBR089C-A	-30	15	0.37314	0.28605	-2	29	0.67808	0.49494	-27	8	0.20344	0.45965	95	3170	0.98734	0.99643	45	1346	0.97373	0.99611
YBR089C-A	-19	31	0.52117	0.48215	1	56	0.72441	0.78351	-6	26	0.78185	0.78926	82	2830	0.98538	0.99608	40	1290	0.9678	0.996
YBR090C	14	53	0.82226	0.68514	-6	60	0.61335	0.80961	-19	52	0.40722	0.95007	-26	30	0.21401	0.84915	-2	7	0.39175	0.18291
YBR090C	40	66	0.89477	0.77292	-30	33	0.16153	0.54828	0	13	0.87166	0.56371	2	14	0.76734	0.66586	-1	8	0.42543	0.19981
YBR091C	-23	2	0.46815	0.13115	5	73	0.77316	0.87249	-13	19	0.59995	0.67836	-17	10	0.38626	0.60142	0	17	0.45375	0.39301
YBR091C	-35	16	0.29925	0.2981	6	57	0.7827	0.78972	-30	15	0.15272	0.60303	-4	25	0.6677	0.8075	-8	13	0.2174	0.29801
YBR094W	-42	-13	0.21308	0.0218	-4	26	0.64842	0.44918	-24	24	0.26817	0.76179	31	123	0.96122	0.9817	23	48	0.90614	0.905
YBR094W	-37	-14	0.27148	0.01973	-3	9	0.66383	0.20085	-35	1	0.08513	0.30396	-5	35	0.64549	0.88068	25	30	0.9203	0.6852
YBR096W	48	51	0.90648	0.66873	23	61	0.8879	0.81558	-14	24	0.5661	0.76179	5	32	0.81003	0.86181	-33	-2	0.00776	0.06736
YBR096W	30	37	0.87366	0.54297	26	115	0.8956	0.96389	-11	37	0.65819	0.88716	-24	24	0.24657	0.79726	-17	6	0.06474	0.16499
YBR097W	-32	33	0.34411	0.50327	-20	-10	0.33536	0.03839	-16	-1	0.50341	0.26339	-8	-37	0.58405	0.02312	-10	9	0.17001	0.21705
YBR097W	-33	39	0.33	0.56087	-17	-1	0.39526	0.09484	-17	0	0.47059	0.28447	1	-13	0.75135	0.20642	-10	9	0.17001	0.21705
YBR099C	-43	30	0.20218	0.47114	-32	100	0.136	0.94665	-17	11	0.47059	0.5188	-11	54	0.52376	0.93993	-19	12	0.04909	0.27574
YBR099C	-11	54	0.62145	0.69213	-28	66	0.18889	0.84214	-26	34	0.22361	0.86927	-2	11	0.70014	0.61592	-7	18	0.24195	0.41584
YBR100W	5	31	0.765	0.48215	-12	46	0.49701	0.69544	-2	3	0.84921	0.34488	-6	13	0.62581	0.65044	7	21	0.65528	0.48812
YBR100W	-9	37	0.6436	0.54297	-10	16	0.53977	0.29972	-21	1	0.34864	0.30396	-28	-26	0.18616	0.06869	4	39	0.57033	0.82153
YBR102C	-52	45	0.12644	0.61767	-12	54	0.49701	0.76983	-8	50	0.73729	0.94597	3	13	0.78414	0.65044	-9	22	0.19079	0.51301
YBR102C	-24	23	0.45496	0.38772	-30	12	0.16153	0.24085	-5	33	0.80282	0.86015	-13	25	0.47831	0.8075	17	25	0.84813	0.58346
YBR103W	2	42	0.74274	0.58875	-16	64	0.41515	0.83157	-32	9	0.12149	0.47754	1	21	0.75135	0.76182	-18	-2	0.05549	0.06736
YBR103W	-8	64	0.65393	0.76179	9	81	0.81248	0.90193	-12	5	0.63095	0.39012	-19	6	0.34115	0.53549	-3	1	0.35795	0.09648
YBR105C	-24	16	0.45496	0.2981	13	98	0.84088	0.94412	-27	9	0.20344	0.47754	28	37	0.95489	0.89034	-20	1	0.04179	0.09648
YBR105C	-40	23	0.23511	0.38772	-10	66	0.53977	0.84214	-17	26	0.47059	0.78926	25	15	0.9481	0.68012	n	n	n	n
YBR107C	-22	50	0.4825	0.66069	-20	32	0.33536	0.53541	-9	41	0.71153	0.90984	-40	-8	0.0558	0.28374	4	36	0.57033	0.78237
YBR107C	-13	64	0.5969	0.76179	-15	40	0.43573	0.63612	-20	28	0.37679	0.81399	-2	-15	0.70014	0.17869	-1	34	0.42543	0.75176
YBR108W	50	132	0.90854	0.95926	-19	13	0.35709	0.255	2	47	0.89218	0.93708	10	41	0.8656	0.90829	11	34	0.74743	0.75176
YBR108W	32	125	0.8786	0.95272	-22	76	0.29799	0.88457	-1	18	0.86152	0.66115	13	-14	0.88931	0.19295	13	40	0.78625	0.83295
YBR109C	17	120	0.83786	0.94767	-9	18	0.5607	0.32754	-11	24	0.65819	0.76179	12	23	0.88137	0.78771	3	24	0.54224	0.55811
YBR109C	-1	110	0.72105	0.9331	-32	42	0.136	0.65957	-16	22	0.50341	0.72965	-11	17	0.52376	0.71085	-1	23	0.42543	0.53562
YBR117C	-28	24	0.4008	0.40137	-24	47	0.26109	0.70452	2	7	0.89218	0.4372	1	3	0.75135	0.48256	10	20	0.72539	0.46688
YBR117C	-26	55	0.42845	0.69982	-27	60	0.20406	0.80961	2	2	0.89218	0.32562	-19	-3	0.34115	0.37245	0	23	0.45375	0.53562
YBR118W	20979	295	0.99621	0.98795	2123	94	0.99068	0.93711	24	72	0.97013	0.9756	33	1	0.9641	0.44379	11	48	0.74743	0.905
YBR118W	25058	349	0.99736	0.98921	2010	93	0.98999	0.934	39	74	0.97823	0.97606	46	31	0.97606	0.85594	13	62	0.78625	0.9598
YBR120C	-11	40	0.62145	0.56947	-33	23	0.12669	0.40388	-23	-4	0.29348	0.21461	-38	-35	0.07191	0.02842	23	27	0.90614	0.62537
YBR120C	-14	15	0.58531	0.28605	-33	-4	0.12669	0.07346	-29	2	0.16822	0.32562	-2	15	0.70014	0.68012	0	22	0.45375	0.51301
YBR121C	6	87	0.77349	0.87137	4	57	0.76178	0.78972	28	58	0.97276	0.96079	n	n	n	n	23	51	0.90614	0.92498
YBR121C	46	82	0.90327	0.85415	282	33	0.97482	0.54828	249	99	0.98951	0.98586	n	n	n	n	1	53	0.48401	0.93286
YBR122C	-25	40	0.44211	0.56947	-35	35	0.106	0.57323	-42	64	0.03544	0.96774	-12	32	0.50017	0.86181	-6	10	0.26775	0.23544
YBR122C	-42	42	0.21308	0.58875	-49	30	0.03081	0.50862	-15	3	0.53624	0.34488	-34	-6	0.10723	0.31722	-9	15	0.19079	0.3422
YBR124W	58	129	0.91784	0.95639	-47	11	0.03747	0.22545	-38	3	0.06063	0.34488	-3	23	0.683	0.78771	-3	11	0.35795	0.2569
YBR124W	-18	97	0.5331	0.90304	-26	7	0.22372	0.17613	-25	9	0.24515	0.47754	14	-17	0.89828	0.15406	-12	38	0.12765	0.80965
YBR125C	-32	56	0.34411	0.70808	-27	24	0.20406	0.42044	-31	3	0.1338	0.34488	19	-31	0.92831	0.04429	-32	19	0.00844	0.44062
YBR125C	-34	48	0.31589	0.64566	-34	25	0.11738	0.43504	-28	8	0.1852	0.45965	-20	-5	0.32067	0.33517	1	13	0.48401	0.29801
YBR126C	63	164	0.92254	0.97613	-15	33	0.43573	0.54828	-27	30	0.20344	0.83485	27	-1	0.95259	0.40789	14	35	0.80269	0.76729
YBR126C	47	153	0.90499	0.97246	3	61	0.74879	0.81558	-5	56	0.80282	0.95794	23	21	0.94281	0.76182	7	36	0.65528	0.78237
YBR128C	-15	88	0.57292	0.87527	-6	47	0.61335	0.70452	-15	10	0.53624	0.49794	-22	23	0.28155	0.78771	-12	-3	0.12765	0.05948
YBR128C	-22	70	0.4825	0.79483	-25	26	0.24005	0.44918	-31	11	0.1338	0.5188	-21	9	0.30065	0.58646	-5	18	0.29824	0.41584
YBR129C	-55	99	0.10831	0.90935	-25	48	0.24005	0.71545	-31	17	0.1338	0.64246	-6	14	0.62581	0.66586	-12	4	0.12765	0.13553
YBR129C	-55	93	0.10831	0.89064	3	127	0.74879	0.97252	-31	12	0.1338	0.54125	1	-13	0.75135	0.20642	7	21	0.65528	0.48812
YBR130C	-35	56	0.29925	0.70808	-34	4	0.11738	0.13968	-12	0	0.63095	0.28447	-19	24	0.34115	0.79726	-5	9	0.29824	0.21705
YBR130C	-24	62	0.45496	0.74813	-14	42	0.45504	0.65957	-4	23	0.81912	0.74675	-60	-12	0.00621	0.21988	-15	3	0.0862	0.1208
YBR132C	-3	83	0.70361	0.85783	-10	58	0.53977	0.79673	-20	13	0.37679	0.56371	10	-15	0.8656	0.17869	-8	21	0.2174	0.48812
YBR132C	-23	66	0.46815	0.77292	-22	56	0.29799	0.78351	-34	4	0.09528	0.36893	13	25	0.88931	0.8075	-18	19	0.05549	0.44062
YBR133C	3	-5	0.74985	0.06804	-11	1	0.51954	0.1122	2	4	0.89218	0.36893	5	15	0.81003	0.68012	-17	17	0.06474	0.39301
YBR133C	-5	-17	0.6841	0.01296	2	0	0.73925	0.10312	-7	-2	0.76065	0.24549	-45	-8	0.03164	0.28374	-4	2	0.32701	0.10812
YBR135W	-24	36	0.45496	0.5331	-17	73	0.39526	0.87249	-16	46	0.50341	0.93332	-6	13	0.62581	0.65044	1	18	0.48401	0.41584
YBR135W	-10	33	0.63293	0.50327	-23	64	0.27891	0.83157	-13	56	0.59995	0.95794	12	22	0.88137	0.77413	-9	30	0.19079	0.6852
YBR138C	-59	119	0.08915	0.94606	-12	71	0.49701	0.86548	-8	52	0.73729	0.95007	11	6	0.87343	0.53549	-12	15	0.12765	0.3422
YBR138C	-36	136	0.28537	0.96282	1	89	0.72441	0.92527	-17	45	0.47059	0.9291	-9	14	0.5623	0.66586	2	16	0.51427	0.368
YBR139W	-19	56	0.52117	0.70808	-30	22	0.16153	0.38698	-31	-24	0.1338	0.03202	-20	2	0.32067	0.46404	1	23	0.48401	0.53562
YBR139W	-26	37	0.42845	0.54297	-25	20	0.24005	0.35559	-35	-14	0.08513	0.09402	-34	-16	0.10723	0.16741	1	36	0.48401	0.78237
YBR142W	-50	16	0.13952	0.2981	-25	10	0.24005	0.21338	-13	14	0.59995	0.58297	-20	14	0.32067	0.66586	-6	45	0.26775	0.88513
YBR142W	-21	24	0.49512	0.40137	-12	40	0.49701	0.63612	-16	-3	0.50341	0.23022	-23	15	0.26326	0.68012	18	46	0.86138	0.89129
YBR146W	11	94	0.80631	0.89489	-28	23	0.18889	0.40388	2	11	0.89218	0.5188	-4	-34	0.6677	0.03095	0	6	0.45375	0.16499
YBR146W	-12	57	0.60917	0.716	26	110	0.8956	0.95976	-29	30	0.16822	0.83485	-8	-5	0.58405	0.33517	-9	20	0.19079	0.46688
YBR147W	-22	85	0.4825	0.86494	1	108	0.72441	0.95769	-24	13	0.26817	0.56371	-11	15	0.52376	0.68012	4	23	0.57033	0.53562
YBR147W	-22	108	0.4825	0.9292	-1	38	0.69314	0.61243	-3	51	0.83462	0.94814	4	21	0.79772	0.76182	8	35	0.68029	0.76729
YBR148W	-13	46	0.5969	0.62685	-21	36	0.31708	0.58553	-17	21	0.47059	0.71176	5	43	0.81003	0.91612	5	6	0.60059	0.16499
YBR148W	11	78	0.80631	0.83878	-19	34	0.35709	0.56173	0	-3	0.87166	0.23022	-9	-6	0.5623	0.31722	3	22	0.54224	0.51301
YBR150C	-24	30	0.45496	0.47114	-44	4	0.05035	0.13968	-26	-6	0.22361	0.18589	-10	-2	0.54286	0.38948	-6	0	0.26775	0.08495
YBR150C	-22	23	0.4825	0.38772	-50	-8	0.02736	0.04771	-27	-17	0.20344	0.06918	-30	7	0.15671	0.55091	-4	12	0.32701	0.27574
YBR151W	10	68	0.80045	0.7845	31	136	0.90871	0.97781	-1	90	0.86152	0.98244	-4	37	0.6677	0.89034	2	18	0.51427	0.41584
YBR151W	21	110	0.84922	0.9331	25	120	0.89284	0.96838	3	86	0.90289	0.98142	10	23	0.8656	0.78771	10	32	0.72539	0.71865
YBR152W	-54	93	0.11405	0.89064	0	70	0.70935	0.86088	-37	4	0.06861	0.36893	39	24	0.97157	0.79726	-19	5	0.04909	0.14912
YBR152W	-33	104	0.33	0.92197	15	106	0.85341	0.95504	-27	25	0.20344	0.77672	18	-8	0.92336	0.28374	-11	3	0.14786	0.1208
YBR154C	715	43	0.97429	0.59988	32	41	0.91193	0.6483	-12	26	0.63095	0.78926	-1	18	0.71855	0.72477	10	15	0.72539	0.3422
YBR154C	287	54	0.96213	0.69213	-54	7	0.01988	0.17613	8	28	0.93628	0.81399	-25	8	0.22989	0.56943	2	23	0.51427	0.53562
YBR155W	38	182	0.89122	0.97991	9	102	0.81248	0.94918	0	53	0.87166	0.95258	-19	47	0.34115	0.92578	10	22	0.72539	0.51301
YBR155W	45	157	0.90246	0.97395	21	79	0.881	0.89583	21	71	0.96717	0.97481	-25	-28	0.22989	0.05787	6	12	0.62811	0.27574
YBR157C	-6	137	0.67527	0.96385	-5	66	0.63014	0.84214	-18	69	0.43879	0.97287	-4	-35	0.6677	0.02842	1	2	0.48401	0.10812
YBR157C	6	107	0.77349	0.92771	88	683	0.95838	0.99666	-12	39	0.63095	0.90027	-27	11	0.19951	0.61592	-3	9	0.35795	0.21705
YBR159W	66	149	0.92507	0.96993	46	116	0.93343	0.9647	-11	55	0.65819	0.95634	-2	20	0.70014	0.74962	-11	3	0.14786	0.1208
YBR159W	50	102	0.90854	0.91669	12	145	0.83329	0.98171	8	52	0.93628	0.95007	-27	-28	0.19951	0.05787	-10	9	0.17001	0.21705
YBR160W	-29	86	0.38726	0.86861	0	75	0.70935	0.87928	-33	33	0.1069	0.86015	-8	-7	0.58405	0.2995	7	12	0.65528	0.27574
YBR160W	-38	97	0.25943	0.90304	7	38	0.79294	0.61243	-21	29	0.34864	0.82288	7	-10	0.83396	0.2491	-6	11	0.26775	0.2569
YBR161W	-43	41	0.20218	0.5798	1	50	0.72441	0.73419	-14	34	0.5661	0.86927	-6	21	0.62581	0.76182	6	-1	0.62811	0.07387
YBR161W	-36	18	0.28537	0.32426	-5	56	0.63014	0.78351	-10	29	0.68429	0.82288	-24	7	0.24657	0.55091	-12	5	0.12765	0.14912
YBR162C	-69	21	0.05932	0.36247	-3	84	0.66383	0.91043	-13	23	0.59995	0.74675	-23	32	0.26326	0.86181	-9	5	0.19079	0.14912
YBR162C	-105	41	0.01755	0.5798	9	86	0.81248	0.91641	-23	0	0.29348	0.28447	-20	-21	0.32067	0.11011	-16	-2	0.07456	0.06736
YBR162W-A	-30	30	0.37314	0.47114	75	195	0.95389	0.99068	4	40	0.91201	0.9046	-19	7	0.34115	0.55091	-8	7	0.2174	0.18291
YBR162W-A	-19	59	0.52117	0.72782	42	91	0.93021	0.92975	6	64	0.92523	0.96774	-16	4	0.40835	0.50132	-19	12	0.04909	0.27574
YBR164C	6	58	0.77349	0.72128	-17	23	0.39526	0.40388	-16	19	0.50341	0.67836	-21	26	0.30065	0.81774	10	17	0.72539	0.39301
YBR164C	16	66	0.83281	0.77292	-7	26	0.59611	0.44918	-6	12	0.78185	0.54125	-29	17	0.17167	0.71085	10	36	0.72539	0.78237
YBR165W	-86	32	0.0343	0.4942	-8	68	0.57852	0.85191	-33	6	0.1069	0.416	0	4	0.73443	0.50132	-25	-12	0.01963	0.01906
YBR165W	-56	51	0.10338	0.66873	17	87	0.86261	0.9194	-14	19	0.5661	0.67836	-28	2	0.18616	0.46404	-21	-11	0.03688	0.02249
YBR166C	-17	25	0.54652	0.41296	12	32	0.83329	0.53541	-14	38	0.5661	0.89343	-32	-1	0.13128	0.40789	-9	-1	0.19079	0.07387
YBR166C	-26	53	0.42845	0.68514	-7	35	0.59611	0.57323	-28	31	0.1852	0.84271	-31	7	0.14359	0.55091	-3	18	0.35795	0.41584
YBR167C	-35	16	0.29925	0.2981	-28	22	0.18889	0.38698	-17	8	0.47059	0.45965	-19	8	0.34115	0.56943	-3	5	0.35795	0.14912
YBR167C	-27	12	0.41422	0.24658	-31	-13	0.1483	0.02885	-25	5	0.24515	0.39012	-33	-21	0.11954	0.11011	-23	3	0.02626	0.1208
YBR168W	-71	25	0.05473	0.41296	15	64	0.85341	0.83157	-34	-2	0.09528	0.24549	-12	6	0.50017	0.53549	-16	10	0.07456	0.23544
YBR168W	-86	18	0.0343	0.32426	-1	108	0.69314	0.95769	-22	13	0.31878	0.56371	-40	-9	0.0558	0.26659	0	10	0.45375	0.23544
YBR169C	-9	57	0.6436	0.716	15	60	0.85341	0.80961	8	62	0.93628	0.96626	-10	-15	0.54286	0.17869	-7	9	0.24195	0.21705
YBR169C	-14	50	0.58531	0.66069	9	73	0.81248	0.87249	-4	194	0.81912	0.99327	-1	-20	0.71855	0.11839	8	18	0.68029	0.41584
YBR170C	-57	67	0.09913	0.779	38	128	0.92561	0.97309	-21	11	0.34864	0.5188	-21	-6	0.30065	0.31722	-3	13	0.35795	0.29801
YBR170C	-29	57	0.38726	0.716	41	94	0.92952	0.93711	-33	-14	0.1069	0.09402	-3	15	0.683	0.68012	-16	12	0.07456	0.27574
YBR171W	-27	60	0.41422	0.73585	-12	51	0.49701	0.74384	1	24	0.88203	0.76179	-31	10	0.14359	0.60142	-2	11	0.39175	0.2569
YBR171W	-14	61	0.58531	0.74216	-17	89	0.39526	0.92527	-14	22	0.5661	0.72965	-13	-2	0.47831	0.38948	-7	35	0.24195	0.76729
YBR173C	-46	14	0.17223	0.27366	13	103	0.84088	0.95033	-24	14	0.26817	0.58297	-53	-19	0.01288	0.12748	-8	28	0.2174	0.64501
YBR173C	-57	14	0.09913	0.27366	25	113	0.89284	0.96229	-11	23	0.65819	0.74675	-12	8	0.50017	0.56943	-16	12	0.07456	0.27574
YBR174C	-3	55	0.70361	0.69982	7	69	0.79294	0.8572	-43	12	0.03054	0.54125	-12	-16	0.50017	0.16741	-11	4	0.14786	0.13553
YBR174C	-20	59	0.50877	0.72782	-3	77	0.66383	0.88813	-15	-1	0.53624	0.26339	-11	-5	0.52376	0.33517	-12	41	0.12765	0.84391
YBR175W	-54	17	0.11405	0.30866	12	104	0.83329	0.95182	-8	14	0.73729	0.58297	18	26	0.92336	0.81774	10	11	0.72539	0.2569
YBR175W	-50	28	0.13952	0.44899	19	91	0.87226	0.92975	-12	47	0.63095	0.93708	-18	10	0.3652	0.60142	-12	16	0.12765	0.368
YBR176W	-10	58	0.63293	0.72128	14	55	0.84663	0.77696	-19	17	0.40722	0.64246	-28	11	0.18616	0.61592	2	16	0.51427	0.368
YBR176W	-24	34	0.45496	0.51222	-15	23	0.43573	0.40388	-17	-1	0.47059	0.26339	-6	-21	0.62581	0.11011	15	23	0.81947	0.53562
YBR177C	161	79	0.9518	0.84325	56	113	0.94286	0.96229	-6	30	0.78185	0.83485	-18	21	0.3652	0.76182	3	-1	0.54224	0.07387
YBR177C	154	50	0.9502	0.66069	23	70	0.8879	0.86088	13	44	0.95361	0.92432	-8	5	0.58405	0.51846	3	27	0.54224	0.62537
YBR178W	-32	7	0.34411	0.18829	-15	46	0.43573	0.69544	-11	0	0.65819	0.28447	-12	0	0.50017	0.42722	-12	22	0.12765	0.51301
YBR178W	-29	-5	0.38726	0.06804	-21	44	0.31708	0.679	-21	9	0.34864	0.47754	8	-14	0.84501	0.19295	15	4	0.81947	0.13553
YBR183W	-12	52	0.60917	0.67733	-25	57	0.24005	0.78972	-13	29	0.59995	0.82288	-29	22	0.17167	0.77413	-9	5	0.19079	0.14912
YBR183W	-10	33	0.63293	0.50327	3	28	0.74879	0.48103	-15	25	0.53624	0.77672	-25	10	0.22989	0.60142	3	25	0.54224	0.58346
YBR184W	-24	46	0.45496	0.62685	-19	33	0.35709	0.54828	-8	25	0.73729	0.77672	27	-28	0.95259	0.05787	-7	-2	0.24195	0.06736
YBR184W	31	93	0.87584	0.89064	-23	26	0.27891	0.44918	-15	40	0.53624	0.9046	15	-1	0.90657	0.40789	4	8	0.57033	0.19981
YBR185C	13	31	0.81721	0.48215	66	130	0.94918	0.97424	-9	19	0.71153	0.67836	-40	-17	0.0558	0.15406	-12	-8	0.12765	0.03322
YBR185C	19	33	0.84337	0.50327	50	111	0.93734	0.96091	-7	22	0.76065	0.72965	-7	29	0.60326	0.84029	-10	-11	0.17001	0.02249
YBR188C	-21	41	0.49512	0.5798	-7	70	0.59611	0.86088	-3	27	0.83462	0.80009	5	73	0.81003	0.96387	-17	-9	0.06474	0.02911
YBR188C	-31	38	0.35903	0.55261	-20	61	0.33536	0.81558	-26	29	0.22361	0.82288	14	94	0.89828	0.97399	-6	6	0.26775	0.16499
YBR190W	-23	25	0.46815	0.41296	-17	63	0.39526	0.82593	-25	8	0.24515	0.45965	23	54	0.94281	0.93993	-5	-12	0.29824	0.01906
YBR190W	-5	44	0.6841	0.6078	7	86	0.79294	0.91641	11	15	0.94837	0.60303	-21	32	0.30065	0.86181	1	11	0.48401	0.2569
YBR192W	6	36	0.77349	0.5331	1	60	0.72441	0.80961	-14	8	0.5661	0.45965	22	37	0.94016	0.89034	-12	-9	0.12765	0.02911
YBR192W	-12	21	0.60917	0.36247	0	77	0.70935	0.88813	-29	38	0.16822	0.89343	13	58	0.88931	0.94718	0	7	0.45375	0.18291
YBR194W	-31	7	0.35903	0.18829	-26	8	0.22372	0.18808	-18	17	0.43879	0.64246	-29	0	0.17167	0.42722	-3	4	0.35795	0.13553
YBR194W	-23	21	0.46815	0.36247	-6	9	0.61335	0.20085	-25	9	0.24515	0.47754	-33	20	0.11954	0.74962	-7	31	0.24195	0.70221
YBR195C	-33	1	0.33	0.12002	-7	74	0.59611	0.87594	-18	27	0.43879	0.80009	-12	18	0.50017	0.72477	-15	-7	0.0862	0.03767
YBR195C	-44	-4	0.19196	0.07596	-6	75	0.61335	0.87928	-14	-8	0.5661	0.15614	-13	20	0.47831	0.74962	-37	-8	0.00548	0.03322
YBR197C	-29	20	0.38726	0.34893	-22	86	0.29799	0.91641	-16	26	0.50341	0.78926	-18	35	0.3652	0.88068	5	9	0.60059	0.21705
YBR197C	-36	26	0.28537	0.42558	-14	75	0.45504	0.87928	-23	20	0.29348	0.69591	32	61	0.96295	0.95282	-10	-2	0.17001	0.06736
YBR198C	-50	2	0.13952	0.13115	-9	49	0.5607	0.72579	-25	11	0.24515	0.5188	-23	18	0.26326	0.72477	-18	5	0.05549	0.14912
YBR198C	-59	5	0.08915	0.16442	17	49	0.86261	0.72579	-19	-1	0.40722	0.26339	-21	27	0.30065	0.82533	-3	-4	0.35795	0.05263
YBR199W	5	39	0.765	0.56087	-10	56	0.53977	0.78351	-30	4	0.15272	0.36893	10	21	0.8656	0.76182	-12	17	0.12765	0.39301
YBR199W	-18	26	0.5331	0.42558	-7	71	0.59611	0.86548	-9	25	0.71153	0.77672	5	56	0.81003	0.94431	-5	7	0.29824	0.18291
YBR204C	8	112	0.78852	0.9362	-17	32	0.39526	0.53541	-25	16	0.24515	0.62502	-13	2	0.47831	0.46404	7	21	0.65528	0.48812
YBR204C	11	129	0.80631	0.95639	-27	33	0.20406	0.54828	-38	24	0.06063	0.76179	-16	-21	0.40835	0.11011	2	22	0.51427	0.51301
YBR206W	-12	24	0.60917	0.40137	-22	32	0.29799	0.53541	-24	42	0.26817	0.91565	-2	4	0.70014	0.50132	10	36	0.72539	0.78237
YBR206W	-19	36	0.52117	0.5331	-16	26	0.41515	0.44918	-3	20	0.83462	0.69591	-7	22	0.60326	0.77413	2	33	0.51427	0.73361
YBR207W	22	106	0.85117	0.92633	-43	14	0.05495	0.26983	-26	5	0.22361	0.39012	-19	6	0.34115	0.53549	13	26	0.78625	0.60687
YBR207W	26	108	0.86299	0.9292	-25	37	0.24005	0.59933	-32	4	0.12149	0.36893	-4	1	0.6677	0.44379	-9	15	0.19079	0.3422
YBR210W	-27	70	0.41422	0.79483	-26	27	0.22372	0.46481	-9	44	0.71153	0.92432	9	49	0.8549	0.92969	17	30	0.84813	0.6852
YBR210W	-6	70	0.67527	0.79483	15	60	0.85341	0.80961	-17	13	0.47059	0.56371	-14	-3	0.45575	0.37245	16	39	0.8334	0.82153
YBR212W	1	34	0.73482	0.51222	-10	50	0.53977	0.73419	-2	15	0.84921	0.60303	32	126	0.96295	0.98228	31	81	0.94599	0.98001
YBR212W	-18	31	0.5331	0.48215	-5	48	0.63014	0.71545	2	30	0.89218	0.83485	13	151	0.88931	0.98458	36	79	0.96072	0.97899
YBR220C	-12	3	0.60917	0.14331	6	-7	0.7827	0.05334	6	0	0.92523	0.28447	-15	-20	0.43217	0.11839	13	27	0.78625	0.62537
YBR220C	-15	-1	0.57292	0.09959	6	-10	0.7827	0.03839	9	-11	0.94118	0.12149	-40	-9	0.0558	0.26659	-8	21	0.2174	0.48812
YBR221C	-5	47	0.6841	0.63614	-29	29	0.17475	0.49494	-6	28	0.78185	0.81399	-23	19	0.26326	0.73858	14	11	0.80269	0.2569
YBR221C	5	53	0.765	0.68514	-39	43	0.0753	0.67038	-11	15	0.65819	0.60303	-21	17	0.30065	0.71085	4	5	0.57033	0.14912
YBR222C	42078	1572	0.99885	0.99541	26736	243	0.99885	0.99344	20952	173	0.99874	0.9919	21624	2285	0.99953	0.99585	11090	294	0.99942	0.99292
YBR222C	45058	1995	0.99908	0.99655	25647	193	0.9985	0.99057	23827	184	0.99908	0.9927	14206	1523	0.99907	0.99493	9076	292	0.99897	0.99269
YBR223C	23	113	0.85381	0.93734	-38	41	0.08208	0.6483	-38	-8	0.06063	0.15614	-21	3	0.30065	0.48256	-19	16	0.04909	0.368
YBR223C	4	102	0.75857	0.91669	-31	24	0.1483	0.42044	-22	-1	0.31878	0.26339	-22	4	0.28155	0.50132	1	14	0.48401	0.32187
YBR225W	-11	57	0.62145	0.716	-26	36	0.22372	0.58553	-17	25	0.47059	0.77672	-7	-18	0.60326	0.14129	-11	28	0.14786	0.64501
YBR225W	-12	89	0.60917	0.87837	-12	30	0.49701	0.50862	-22	16	0.31878	0.62502	-15	-5	0.43217	0.33517	-8	25	0.2174	0.58346
YBR229C	-23	82	0.46815	0.85415	-45	37	0.04541	0.59933	-47	27	0.01948	0.80009	-7	11	0.60326	0.61592	-2	11	0.39175	0.2569
YBR229C	-37	71	0.27148	0.8016	-35	-9	0.106	0.04414	-25	-13	0.24515	0.10109	-6	39	0.62581	0.89978	-8	8	0.2174	0.19981
YBR231C	-104	63	0.01824	0.75547	3	72	0.74879	0.86962	-31	-23	0.1338	0.03521	-5	28	0.64549	0.8327	3	29	0.54224	0.66693
YBR231C	-87	65	0.03293	0.76718	-44	41	0.05035	0.6483	-25	19	0.24515	0.67836	14	-23	0.89828	0.0925	12	24	0.76729	0.55811
YBR232C	-5	64	0.6841	0.76179	-3	14	0.66383	0.26983	-12	22	0.63095	0.72965	-9	-31	0.5623	0.04429	-14	4	0.09796	0.13553
YBR232C	-5	62	0.6841	0.74813	-24	58	0.26109	0.79673	1	28	0.88203	0.81399	-32	-5	0.13128	0.33517	-15	12	0.0862	0.27574
YBR235W	n	n	n	n	n	n	n	n	-37	-18	0.06861	0.06143	-17	21	0.38626	0.76182	29	29	0.93845	0.66693
YBR235W	n	n	n	n	n	n	n	n	1	-16	0.88203	0.07829	-15	-2	0.43217	0.38948	4	41	0.57033	0.84391
YBR236C	20	84	0.84578	0.86219	-12	52	0.49701	0.75293	-33	20	0.1069	0.69591	3	7	0.78414	0.55091	-11	19	0.14786	0.44062
YBR236C	-2	95	0.71244	0.89764	-11	47	0.51954	0.70452	-24	20	0.26817	0.69591	-14	-21	0.45575	0.11011	-10	19	0.17001	0.44062
YBR237W	-27	121	0.41422	0.94847	-2	61	0.67808	0.81558	-10	44	0.68429	0.92432	10	33	0.8656	0.86848	-11	18	0.14786	0.41584
YBR237W	-7	131	0.66494	0.95834	-8	81	0.57852	0.90193	-5	20	0.80282	0.69591	-1	-29	0.71855	0.05315	-11	19	0.14786	0.44062
YBR239C	0	95	0.72851	0.89764	-28	70	0.18889	0.86088	-21	28	0.34864	0.81399	-26	-3	0.21401	0.37245	-22	11	0.03082	0.2569
YBR239C	-14	76	0.58531	0.8273	1	85	0.72441	0.91354	-26	7	0.22361	0.4372	-19	-10	0.34115	0.2491	-22	17	0.03082	0.39301
YBR241C	75	134	0.93034	0.96121	-14	41	0.45504	0.6483	-5	46	0.80282	0.93332	-18	-15	0.3652	0.17869	11	36	0.74743	0.78237
YBR241C	42	32	0.8973	0.4942	31	104	0.90871	0.95182	-13	38	0.59995	0.89343	-7	25	0.60326	0.8075	1	23	0.48401	0.53562
YBR242W	-19	30	0.52117	0.47114	-18	5	0.37744	0.15118	-41	-20	0.04103	0.05071	-20	-2	0.32067	0.38948	-8	2	0.2174	0.10812
YBR242W	-35	62	0.29925	0.74813	6	32	0.7827	0.53541	-41	-52	0.04103	0.00148	-2	-37	0.70014	0.02312	-12	4	0.12765	0.13553
YBR244W	4	117	0.75857	0.94228	5	79	0.77316	0.89583	-12	34	0.63095	0.86927	-22	25	0.28155	0.8075	5	30	0.60059	0.6852
YBR244W	20	132	0.84578	0.95926	33	87	0.91457	0.9194	-19	42	0.40722	0.91565	-3	11	0.683	0.61592	1	27	0.48401	0.62537
YBR246W	18	81	0.84084	0.85094	-10	62	0.53977	0.82087	-11	15	0.65819	0.60303	-37	-24	0.07973	0.0841	-4	-1	0.32701	0.07387
YBR246W	27	110	0.86586	0.9331	-2	39	0.67808	0.62451	-8	27	0.73729	0.80009	1	-10	0.75135	0.2491	4	13	0.57033	0.29801
YBR252W	-18	44	0.5331	0.6078	13	90	0.84088	0.92756	-5	48	0.80282	0.94141	-11	13	0.52376	0.65044	-16	14	0.07456	0.32187
YBR252W	-12	47	0.60917	0.63614	21	81	0.881	0.90193	-13	26	0.59995	0.78926	-36	35	0.08767	0.88068	4	20	0.57033	0.46688
YBR253W	6	58	0.77349	0.72128	-15	37	0.43573	0.59933	-13	19	0.59995	0.67836	-40	-9	0.0558	0.26659	-14	-5	0.09796	0.04761
YBR253W	3	72	0.74985	0.80573	-17	29	0.39526	0.49494	-6	13	0.78185	0.56371	-56	-12	0.00908	0.21988	-9	1	0.19079	0.09648
YBR254C	-37	51	0.27148	0.66873	-9	51	0.5607	0.74384	-12	0	0.63095	0.28447	-27	2	0.19951	0.46404	-20	8	0.04179	0.19981
YBR254C	-46	37	0.17223	0.54297	9	79	0.81248	0.89583	5	36	0.91907	0.88226	-33	12	0.11954	0.63099	-19	0	0.04909	0.08495
YBR256C	-42	11	0.21308	0.23442	-24	24	0.26109	0.42044	-13	9	0.59995	0.47754	-4	-6	0.6677	0.31722	0	18	0.45375	0.41584
YBR256C	-47	8	0.16201	0.19988	-11	32	0.51954	0.53541	-18	17	0.43879	0.64246	-25	-18	0.22989	0.14129	-11	39	0.14786	0.82153
YBR258C	-42	0	0.21308	0.10923	1	52	0.72441	0.75293	-20	-6	0.37679	0.18589	-11	-18	0.52376	0.14129	-6	20	0.26775	0.46688
YBR258C	-37	-4	0.27148	0.07596	-1	53	0.69314	0.76086	-15	-6	0.53624	0.18589	13	8	0.88931	0.56943	0	14	0.45375	0.32187
YBR262C	-39	45	0.24555	0.61767	-25	37	0.24005	0.59933	-27	16	0.20344	0.62502	0	29	0.73443	0.84029	-1	13	0.42543	0.29801
YBR262C	-8	73	0.65393	0.81055	-15	13	0.43573	0.255	-18	7	0.43879	0.4372	-22	8	0.28155	0.56943	-3	13	0.35795	0.29801
YBR264C	-9	22	0.6436	0.37555	7	43	0.79294	0.67038	3	22	0.90289	0.72965	4	6	0.79772	0.53549	7	21	0.65528	0.48812
YBR264C	-13	33	0.5969	0.50327	10	67	0.81984	0.8464	0	6	0.87166	0.416	4	25	0.79772	0.8075	16	25	0.8334	0.58346
YBR267W	-27	22	0.41422	0.37555	12	89	0.83329	0.92527	-18	13	0.43879	0.56371	12	-1	0.88137	0.40789	-6	5	0.26775	0.14912
YBR267W	-17	49	0.54652	0.65289	-19	30	0.35709	0.50862	-25	13	0.24515	0.56371	-23	26	0.26326	0.81774	1	21	0.48401	0.48812
YBR269C	-26	17	0.42845	0.30866	20	113	0.87617	0.96229	-16	22	0.50341	0.72965	-23	-14	0.26326	0.19295	-7	6	0.24195	0.16499
YBR269C	-13	21	0.5969	0.36247	28	97	0.90181	0.94274	-8	26	0.73729	0.78926	5	-21	0.81003	0.11011	2	12	0.51427	0.27574
YBR270C	-29	9	0.38726	0.21113	29	109	0.90411	0.95895	-10	16	0.68429	0.62502	-2	1	0.70014	0.44379	-1	10	0.42543	0.23544
YBR270C	5	42	0.765	0.58875	24	94	0.88997	0.93711	-10	19	0.68429	0.67836	-16	12	0.40835	0.63099	7	16	0.65528	0.368
YBR272C	-26	21	0.42845	0.36247	32	118	0.91193	0.96608	-9	28	0.71153	0.81399	-12	13	0.50017	0.65044	-5	6	0.29824	0.16499
YBR272C	-3	51	0.70361	0.66873	12	138	0.83329	0.97861	-5	14	0.80282	0.58297	-25	-2	0.22989	0.38948	-19	-7	0.04909	0.03767
YBR273C	-50	2	0.13952	0.13115	70	166	0.95159	0.98654	-29	10	0.16822	0.49794	46	47	0.97606	0.92578	n	n	n	n
YBR273C	-58	-6	0.09443	0.05874	-26	69	0.22372	0.8572	-24	-10	0.26817	0.13289	-31	36	0.14359	0.88654	-48	-12	0.00251	0.01906
YBR282W	-17	-2	0.54652	0.09213	-35	3	0.106	0.12979	-27	-8	0.20344	0.15614	-37	-12	0.07973	0.21988	-3	39	0.35795	0.82153
YBR282W	-24	0	0.45496	0.10923	-5	27	0.63014	0.46481	-24	10	0.26817	0.49794	-20	-15	0.32067	0.17869	14	27	0.80269	0.62537
YBR283C	-42	6	0.21308	0.17636	26	129	0.8956	0.97332	-32	10	0.12149	0.49794	-23	43	0.26326	0.91612	-6	-5	0.26775	0.04761
YBR283C	-39	0	0.24555	0.10923	13	148	0.84088	0.98286	-12	0	0.63095	0.28447	28	51	0.95489	0.93395	-16	10	0.07456	0.23544
YBR284W	-52	16	0.12644	0.2981	-30	25	0.16153	0.43504	-14	-5	0.5661	0.2007	7	18	0.83396	0.72477	25	47	0.9203	0.89883
YBR284W	-49	28	0.14733	0.44899	-17	22	0.39526	0.38698	-28	-23	0.1852	0.03521	-7	-22	0.60326	0.1009	32	49	0.94998	0.91208
YBR287W	-15	82	0.57292	0.85415	-50	20	0.02736	0.35559	-19	26	0.40722	0.78926	38	1	0.97054	0.44379	7	32	0.65528	0.71865
YBR287W	-12	72	0.60917	0.80573	-34	-3	0.11738	0.08093	-21	36	0.34864	0.88226	26	27	0.9504	0.82533	3	22	0.54224	0.51301
YBR291C	-16	44	0.5596	0.6078	-29	7	0.17475	0.17613	-16	15	0.50341	0.60303	-29	8	0.17167	0.56943	7	31	0.65528	0.70221
YBR291C	-24	30	0.45496	0.47114	-27	12	0.20406	0.24085	-3	24	0.83462	0.76179	1	-1	0.75135	0.40789	15	43	0.81947	0.86526
YBR293W	366	87	0.96603	0.87137	65	24	0.94837	0.42044	-8	14	0.73729	0.58297	22	-9	0.94016	0.26659	7	39	0.65528	0.82153
YBR293W	401	118	0.96741	0.94446	59	14	0.94515	0.26983	-19	37	0.40722	0.88716	11	34	0.87343	0.87504	26	59	0.92646	0.95387
YBR295W	-43	20	0.20218	0.34893	-12	62	0.49701	0.82087	-28	0	0.1852	0.28447	-14	-24	0.45575	0.0841	0	20	0.45375	0.46688
YBR295W	-31	55	0.35903	0.69982	-26	5	0.22372	0.15118	-25	23	0.24515	0.74675	-5	-4	0.64549	0.35254	-3	15	0.35795	0.3422
YBR297W	-33	-7	0.33	0.05197	0	37	0.70935	0.59933	-13	2	0.59995	0.32562	-23	-8	0.26326	0.28374	-1	11	0.42543	0.2569
YBR297W	-39	-20	0.24555	0.00803	-10	26	0.53977	0.44918	-18	-12	0.43879	0.11032	-14	-8	0.45575	0.28374	n	n	n	n
YBR298C-A	-20	35	0.50877	0.52208	-35	-8	0.106	0.04771	-20	4	0.37679	0.36893	-30	2	0.15671	0.46404	13	25	0.78625	0.58346
YBR298C-A	-31	40	0.35903	0.56947	-19	40	0.35709	0.63612	-30	-16	0.15272	0.07829	-13	-23	0.47831	0.0925	-2	35	0.39175	0.76729
YBR299W	4	45	0.75857	0.61767	-12	38	0.49701	0.61243	29	106	0.97367	0.98689	-20	4	0.32067	0.50132	19	51	0.87303	0.92498
YBR299W	-1	63	0.72105	0.75547	-34	20	0.11738	0.35559	23	71	0.96888	0.97481	-6	18	0.62581	0.72477	16	48	0.8334	0.905
YCL001W-A	-8	76	0.65393	0.8273	-43	21	0.05495	0.371	-16	-4	0.50341	0.21461	-17	15	0.38626	0.68012	11	15	0.74743	0.3422
YCL001W-A	-33	35	0.33	0.52208	-13	-5	0.47516	0.06783	-16	-11	0.50341	0.12149	-17	-3	0.38626	0.37245	-2	5	0.39175	0.14912
YCL002C	-30	35	0.37314	0.52208	-12	-6	0.49701	0.0607	-30	-16	0.15272	0.07829	-2	-20	0.70014	0.11839	-10	2	0.17001	0.10812
YCL002C	42	89	0.8973	0.87837	-22	11	0.29799	0.22545	-27	-8	0.20344	0.15614	1	-14	0.75135	0.19295	-8	-5	0.2174	0.04761
YCL008C	14	151	0.82226	0.97142	-18	38	0.37744	0.61243	-43	-14	0.03054	0.09402	7	22	0.83396	0.77413	21	60	0.89198	0.95581
YCL008C	5	108	0.765	0.9292	-32	49	0.136	0.72579	-26	6	0.22361	0.416	11	0	0.87343	0.42722	10	57	0.72539	0.94747
YCL009C	9	59	0.79414	0.72782	-32	38	0.136	0.61243	3	41	0.90289	0.90984	11	55	0.87343	0.94223	15	48	0.81947	0.905
YCL009C	30	96	0.87366	0.9004	-12	39	0.49701	0.62451	4	43	0.91201	0.92056	-2	17	0.70014	0.71085	-1	35	0.42543	0.76729
YCL017C	6	99	0.77349	0.90935	-12	55	0.49701	0.77696	-13	22	0.59995	0.72965	-2	10	0.70014	0.60142	-2	26	0.39175	0.60687
YCL017C	33	126	0.88112	0.95387	-28	29	0.18889	0.49494	-4	21	0.81912	0.71176	-5	-5	0.64549	0.33517	-1	29	0.42543	0.66693
YCL018W	-37	103	0.27148	0.91956	-9	48	0.5607	0.71545	-21	43	0.34864	0.92056	10	5	0.8656	0.51846	26	47	0.92646	0.89883
YCL018W	-25	88	0.44211	0.87527	-20	51	0.33536	0.74384	-16	36	0.50341	0.88226	-3	17	0.683	0.71085	16	53	0.8334	0.93286
YCL024W	-44	-14	0.19196	0.01973	-16	44	0.41515	0.679	-25	-7	0.24515	0.16981	-36	-31	0.08767	0.04429	-9	-1	0.19079	0.07387
YCL024W	-43	-19	0.20218	0.00952	22	485	0.88491	0.99586	-44	-9	0.02712	0.14315	-39	36	0.06385	0.88654	-27	2	0.01575	0.10812
YCL028W	8	119	0.78852	0.94606	-9	45	0.5607	0.68705	-29	5	0.16822	0.39012	14	42	0.89828	0.9122	19	30	0.87303	0.6852
YCL028W	-10	97	0.63293	0.90304	-24	22	0.26109	0.38698	-23	19	0.29348	0.67836	18	-11	0.92336	0.23392	11	46	0.74743	0.89129
YCL029C	27	137	0.86586	0.96385	2	17	0.73925	0.31352	-6	33	0.78185	0.86015	-6	12	0.62581	0.63099	1	33	0.48401	0.73361
YCL029C	55	140	0.91462	0.96534	-23	53	0.27891	0.76086	-2	61	0.84921	0.96512	-26	20	0.21401	0.74962	-3	43	0.35795	0.86526
YCL030C	-25	104	0.44211	0.92197	28	109	0.90181	0.95895	-20	27	0.37679	0.80009	31	12	0.96122	0.63099	-3	24	0.35795	0.55811
YCL030C	-38	75	0.25943	0.82099	-8	59	0.57852	0.80363	-13	50	0.59995	0.94597	-3	28	0.683	0.8327	8	40	0.68029	0.83295
YCL033C	35	135	0.88525	0.96224	-6	34	0.61335	0.56173	-11	15	0.65819	0.60303	-44	11	0.0352	0.61592	6	21	0.62811	0.48812
YCL033C	44	105	0.90074	0.92449	-3	62	0.66383	0.82087	-14	33	0.5661	0.86015	0	4	0.73443	0.50132	-6	10	0.26775	0.23544
YCL035C	-20	150	0.50877	0.97062	5	74	0.77316	0.87594	-6	29	0.78185	0.82288	33	29	0.9641	0.84029	6	44	0.62811	0.87588
YCL035C	-26	141	0.42845	0.9658	17	65	0.86261	0.83708	-15	35	0.53624	0.87565	4	26	0.79772	0.81774	21	35	0.89198	0.76729
YCL036W	10	91	0.80045	0.88399	-19	23	0.35709	0.40388	6	20	0.92523	0.69591	-13	34	0.47831	0.87504	1	41	0.48401	0.84391
YCL036W	-14	42	0.58531	0.58875	-20	23	0.33536	0.40388	-14	27	0.5661	0.80009	8	40	0.84501	0.90369	1	44	0.48401	0.87588
YCL042W	-35	105	0.29925	0.92449	-8	93	0.57852	0.934	-9	47	0.71153	0.93708	-6	30	0.62581	0.84915	-2	25	0.39175	0.58346
YCL042W	-30	160	0.37314	0.97521	12	91	0.83329	0.92975	-13	21	0.59995	0.71176	-3	-24	0.683	0.0841	14	38	0.80269	0.80965
YCL043C	-18	53	0.5331	0.68514	8	87	0.80351	0.9194	8	50	0.93628	0.94597	-15	-3	0.43217	0.37245	11	34	0.74743	0.75176
YCL043C	-7	62	0.66494	0.74813	27	73	0.89951	0.87249	0	15	0.87166	0.60303	0	23	0.73443	0.78771	-4	24	0.32701	0.55811
YCL045C	-98	53	0.02329	0.68514	-9	47	0.5607	0.70452	-31	40	0.1338	0.9046	8	29	0.84501	0.84029	-4	19	0.32701	0.44062
YCL045C	-119	33	0.01032	0.50327	-23	78	0.27891	0.89215	-20	24	0.37679	0.76179	-21	-10	0.30065	0.2491	6	21	0.62811	0.48812
YCL046W	10	58	0.80045	0.72128	-51	2	0.02494	0.12002	-26	-2	0.22361	0.24549	47	45	0.97698	0.92164	16	33	0.8334	0.73361
YCL046W	-15	17	0.57292	0.30866	-45	20	0.04541	0.35559	-8	18	0.73729	0.66115	-24	21	0.24657	0.76182	20	39	0.88422	0.82153
YCL047C	-12	43	0.60917	0.59988	-9	55	0.5607	0.77696	-2	23	0.84921	0.74675	9	10	0.8549	0.60142	-8	-8	0.2174	0.03322
YCL047C	-12	78	0.60917	0.83878	8	94	0.80351	0.93711	19	33	0.96421	0.86015	-21	8	0.30065	0.56943	-13	3	0.11224	0.1208
YCL050C	-16	47	0.5596	0.63614	-22	25	0.29799	0.43504	-13	15	0.59995	0.60303	8	-3	0.84501	0.37245	5	34	0.60059	0.75176
YCL050C	8	75	0.78852	0.82099	-16	51	0.41515	0.74384	-8	15	0.73729	0.60303	0	11	0.73443	0.61592	-4	29	0.32701	0.66693
YCL056C	-158	44	0.00103	0.6078	-17	24	0.39526	0.42044	-24	-2	0.26817	0.24549	-7	32	0.60326	0.86181	-2	23	0.39175	0.53562
YCL056C	-96	17	0.02467	0.30866	-20	49	0.33536	0.72579	-43	-10	0.03054	0.13289	16	7	0.9137	0.55091	-10	29	0.17001	0.66693
YCL058C	-43	20	0.20218	0.34893	-30	49	0.16153	0.72579	-7	14	0.76065	0.58297	-20	-22	0.32067	0.1009	-10	9	0.17001	0.21705
YCL058C	-54	15	0.11405	0.28605	1	58	0.72441	0.79673	-17	30	0.47059	0.83485	-28	-5	0.18616	0.33517	-11	25	0.14786	0.58346
YCL061C	-2	-4	0.71244	0.07596	8	0	0.80351	0.10312	4	19	0.91201	0.67836	-8	13	0.58405	0.65044	-10	19	0.17001	0.44062
YCL061C	-1	3	0.72105	0.14331	4	8	0.76178	0.18808	8	20	0.93628	0.69591	4	-23	0.79772	0.0925	-2	31	0.39175	0.70221
YCL063W	-63	14	0.07423	0.27366	-27	43	0.20406	0.67038	-17	11	0.47059	0.5188	-9	28	0.5623	0.8327	-22	25	0.03082	0.58346
YCL063W	-47	32	0.16201	0.4942	-26	39	0.22372	0.62451	-28	8	0.1852	0.45965	-34	29	0.10723	0.84029	-15	24	0.0862	0.55811
YCL064C	-91	20	0.0288	0.34893	21	73	0.881	0.87249	-8	30	0.73729	0.83485	-13	82	0.47831	0.96939	-14	34	0.09796	0.75176
YCL064C	-104	7	0.01824	0.18829	26	80	0.8956	0.89974	-12	12	0.63095	0.54125	-18	48	0.3652	0.92739	4	38	0.57033	0.80965
YCL068C	-39	12	0.24555	0.24658	-21	40	0.31708	0.63612	-7	23	0.76065	0.74675	-47	-19	0.0245	0.12748	-11	20	0.14786	0.46688
YCL068C	-48	-3	0.15421	0.08353	-14	43	0.45504	0.67038	-18	23	0.43879	0.74675	-37	20	0.07973	0.74962	13	-9	0.78625	0.02911
YCL074W	-24	27	0.45496	0.4366	-5	48	0.63014	0.71545	-21	12	0.34864	0.54125	-30	9	0.15671	0.58646	9	11	0.70404	0.2569
YCL074W	-32	39	0.34411	0.56087	20	47	0.87617	0.70452	-23	2	0.29348	0.32562	-40	9	0.0558	0.58646	-8	13	0.2174	0.29801
YCR002C	-34	43	0.31589	0.59988	-21	31	0.31708	0.52379	-10	26	0.68429	0.78926	-29	23	0.17167	0.78771	-6	23	0.26775	0.53562
YCR002C	-37	20	0.27148	0.34893	-32	35	0.136	0.57323	-15	33	0.53624	0.86015	-35	14	0.09676	0.66586	-13	34	0.11224	0.75176
YCR005C	-58	-10	0.09443	0.03465	4	71	0.76178	0.86548	-22	7	0.31878	0.4372	-15	28	0.43217	0.8327	-4	10	0.32701	0.23544
YCR005C	-55	-6	0.10831	0.05874	-1	68	0.69314	0.85191	-13	-9	0.59995	0.14315	-41	29	0.04982	0.84029	-5	22	0.29824	0.51301
YCR012W	-28	45	0.4008	0.61767	-35	8	0.106	0.18808	-22	26	0.31878	0.78926	-5	38	0.64549	0.89471	-7	42	0.24195	0.85476
YCR012W	-29	52	0.38726	0.67733	-21	39	0.31708	0.62451	-19	21	0.40722	0.71176	-13	15	0.47831	0.68012	2	33	0.51427	0.73361
YCR013C	-17	34	0.54652	0.51222	-68	30	0.0077	0.50862	-25	17	0.24515	0.64246	-1	-19	0.71855	0.12748	21	30	0.89198	0.6852
YCR013C	-23	30	0.46815	0.47114	15	-3	0.85341	0.08093	-28	23	0.1852	0.74675	4	13	0.79772	0.65044	16	46	0.8334	0.89129
YCR014C	-33	45	0.33	0.61767	-25	19	0.24005	0.34053	-13	13	0.59995	0.56371	5	-19	0.81003	0.12748	7	47	0.65528	0.89883
YCR014C	-26	38	0.42845	0.55261	-44	24	0.05035	0.42044	-13	22	0.59995	0.72965	17	41	0.91876	0.90829	21	42	0.89198	0.85476
YCR016W	107	108	0.94044	0.9292	169	93	0.96838	0.934	1	57	0.88203	0.95953	-7	25	0.60326	0.8075	-1	45	0.42543	0.88513
YCR016W	122	121	0.94515	0.94847	-16	50	0.41515	0.73419	16	70	0.95976	0.97412	19	21	0.92831	0.76182	18	42	0.86138	0.85476
YCR017C	-103	26	0.01916	0.42558	-13	45	0.47516	0.68705	-12	35	0.63095	0.87565	-27	-6	0.19951	0.31722	1	9	0.48401	0.21705
YCR017C	-56	83	0.10338	0.85783	-27	25	0.20406	0.43504	-36	-21	0.07658	0.04638	-23	-5	0.26326	0.33517	29	61	0.93845	0.95798
YCR018C-A	-30	7	0.37314	0.18829	-25	15	0.24005	0.28466	-17	-13	0.47059	0.10109	-27	1	0.19951	0.44379	-10	5	0.17001	0.14912
YCR018C-A	-45	1	0.18255	0.12002	-1	37	0.69314	0.59933	-22	-9	0.31878	0.14315	-35	21	0.09676	0.76182	2	22	0.51427	0.51301
YCR019W	-51	10	0.13333	0.2226	-17	20	0.39526	0.35559	-30	8	0.15272	0.45965	-7	37	0.60326	0.89034	14	55	0.80269	0.94096
YCR019W	-56	7	0.10338	0.18829	-34	36	0.11738	0.58553	-12	13	0.63095	0.56371	-24	32	0.24657	0.86181	25	28	0.9203	0.64501
YCR020C	-14	53	0.58531	0.68514	-21	80	0.31708	0.89974	23	65	0.96888	0.96842	0	-25	0.73443	0.07513	4	39	0.57033	0.82153
YCR020C	-15	40	0.57292	0.56947	-18	52	0.37744	0.75293	14	61	0.95589	0.96512	13	6	0.88931	0.53549	12	34	0.76729	0.75176
YCR020C-A	-32	53	0.34411	0.68514	-30	43	0.16153	0.67038	-3	31	0.83462	0.84271	-36	38	0.08767	0.89471	10	43	0.72539	0.86526
YCR020C-A	-37	26	0.27148	0.42558	-48	7	0.0338	0.17613	-25	21	0.24515	0.71176	3	4	0.78414	0.50132	19	47	0.87303	0.89883
YCR021C	-54	6	0.11405	0.17636	-53	-28	0.02126	0.00528	-42	-13	0.03544	0.10109	8	20	0.84501	0.74962	28	64	0.93514	0.96346
YCR021C	-68	9	0.06081	0.21113	-52	-9	0.02253	0.04414	-22	-2	0.31878	0.24549	13	-3	0.88931	0.37245	56	93	0.98081	0.98492
YCR022C	22	122	0.85117	0.94962	-8	17	0.57852	0.31352	-20	33	0.37679	0.86015	-28	-39	0.18616	0.01875	16	23	0.8334	0.53562
YCR022C	-45	27	0.18255	0.4366	-8	60	0.57852	0.80961	-20	19	0.37679	0.67836	8	-11	0.84501	0.23392	24	25	0.91459	0.58346
YCR023C	50	104	0.90854	0.92197	-22	30	0.29799	0.50862	-24	22	0.26817	0.72965	-9	-30	0.5623	0.0489	9	26	0.70404	0.60687
YCR023C	63	118	0.92254	0.94446	-31	28	0.1483	0.48103	-22	1	0.31878	0.30396	-16	-12	0.40835	0.21988	3	27	0.54224	0.62537
YCR024C	276	116	0.96144	0.94125	17	35	0.86261	0.57323	-21	27	0.34864	0.80009	-5	27	0.64549	0.82533	-3	39	0.35795	0.82153
YCR024C	338	143	0.96465	0.96683	-12	26	0.49701	0.44918	-15	36	0.53624	0.88226	5	34	0.81003	0.87504	18	53	0.86138	0.93286
YCR025C	-4	69	0.6942	0.78921	-48	21	0.0338	0.371	-42	2	0.03544	0.32562	-23	-43	0.26326	0.01127	8	39	0.68029	0.82153
YCR025C	-6	93	0.67527	0.89064	-23	-8	0.27891	0.04771	-34	8	0.09528	0.45965	-15	9	0.43217	0.58646	-8	25	0.2174	0.58346
YCR027C	-8	55	0.65393	0.69982	-17	29	0.39526	0.49494	-8	18	0.73729	0.66115	-9	23	0.5623	0.78771	21	28	0.89198	0.64501
YCR027C	7	73	0.78164	0.81055	-24	37	0.26109	0.59933	-7	31	0.76065	0.84271	15	47	0.90657	0.92578	26	38	0.92646	0.80965
YCR028C	-5	35	0.6841	0.52208	-22	42	0.29799	0.65957	-27	10	0.20344	0.49794	-28	-2	0.18616	0.38948	28	33	0.93514	0.73361
YCR028C	8	29	0.78852	0.46058	-55	-13	0.01805	0.02885	-33	6	0.1069	0.416	-11	17	0.52376	0.71085	23	15	0.90614	0.3422
YCR028C-A	694	6628	0.97383	0.99885	691	4130	0.98493	0.99919	797	7364	0.99304	1	4589	64472	0.99746	1	2687	36820	0.99691	0.99988
YCR028C-A	1194	11178	0.97969	0.99919	555	3823	0.9824	0.99908	839	7268	0.99316	0.99988	3765	58122	0.99735	0.99988	2880	39187	0.99725	1
YCR031C	-55	14	0.10831	0.27366	-22	4	0.29799	0.13968	-13	-16	0.59995	0.07829	-16	-21	0.40835	0.11011	-6	23	0.26775	0.53562
YCR031C	-39	-3	0.24555	0.08353	-22	-6	0.29799	0.0607	-13	-22	0.59995	0.03989	19	30	0.92831	0.84915	7	27	0.65528	0.62537
YCR034W	1	64	0.73482	0.76179	-26	23	0.22372	0.40388	-17	20	0.47059	0.69591	-18	13	0.3652	0.65044	8	53	0.68029	0.93286
YCR034W	-7	66	0.66494	0.77292	-15	58	0.43573	0.79673	-13	10	0.59995	0.49794	0	18	0.73443	0.72477	16	63	0.8334	0.96129
YCR038C	0	131	0.72851	0.95834	-11	40	0.51954	0.63612	-38	2	0.06063	0.32562	-33	15	0.11954	0.68012	-13	35	0.11224	0.76729
YCR038C	6	117	0.77349	0.94228	-15	46	0.43573	0.69544	-32	3	0.12149	0.34488	-4	-11	0.6677	0.23392	-2	32	0.39175	0.71865
YCR041W	2	107	0.74274	0.92771	-29	20	0.17475	0.35559	-23	12	0.29348	0.54125	-24	24	0.24657	0.79726	10	21	0.72539	0.48812
YCR041W	32	129	0.8786	0.95639	6	71	0.7827	0.86548	-31	2	0.1338	0.32562	-31	-12	0.14359	0.21988	-4	24	0.32701	0.55811
YCR043C	28	109	0.86815	0.93184	-2	24	0.67808	0.42044	-20	12	0.37679	0.54125	-1	-16	0.71855	0.16741	-11	26	0.14786	0.60687
YCR043C	59	154	0.91944	0.97257	-16	23	0.41515	0.40388	-6	20	0.78185	0.69591	-42	14	0.0436	0.66586	0	40	0.45375	0.83295
YCR045C	4	122	0.75857	0.94962	-19	17	0.35709	0.31352	-24	52	0.26817	0.95007	-33	15	0.11954	0.68012	-2	21	0.39175	0.48812
YCR045C	22	429	0.85117	0.99024	-22	33	0.29799	0.54828	-29	35	0.16822	0.87565	-13	-1	0.47831	0.40789	-10	5	0.17001	0.14912
YCR049C	-5	53	0.6841	0.68514	7	46	0.79294	0.69544	-20	21	0.37679	0.71176	-31	-11	0.14359	0.23392	3	2	0.54224	0.10812
YCR049C	-8	54	0.65393	0.69213	-11	42	0.51954	0.65957	-2	25	0.84921	0.77672	-3	-28	0.683	0.05787	2	-1	0.51427	0.07387
YCR050C	-43	20	0.20218	0.34893	54	139	0.94113	0.97919	-32	8	0.12149	0.45965	37	1	0.96927	0.44379	-15	29	0.0862	0.66693
YCR050C	-15	72	0.57292	0.80573	-16	22	0.41515	0.38698	2	9	0.89218	0.47754	31	-16	0.96122	0.16741	4	34	0.57033	0.75176
YCR051W	-23	31	0.46815	0.48215	-17	29	0.39526	0.49494	-18	21	0.43879	0.71176	-31	2	0.14359	0.46404	1	9	0.48401	0.21705
YCR051W	-12	59	0.60917	0.72782	0	50	0.70935	0.73419	-19	8	0.40722	0.45965	-15	-2	0.43217	0.38948	0	28	0.45375	0.64501
YCR052W	-44	47	0.19196	0.63614	7	36	0.79294	0.58553	-23	7	0.29348	0.4372	-12	-7	0.50017	0.2995	-2	29	0.39175	0.66693
YCR052W	-30	47	0.37314	0.63614	-27	40	0.20406	0.63612	-21	22	0.34864	0.72965	-61	-9	0.00529	0.26659	4	22	0.57033	0.51301
YCR053W	-35	58	0.29925	0.72128	-1	50	0.69314	0.73419	-23	10	0.29348	0.49794	-24	-22	0.24657	0.1009	-6	3	0.26775	0.1208
YCR053W	-23	62	0.46815	0.74813	-13	36	0.47516	0.58553	-10	15	0.68429	0.60303	-30	-16	0.15671	0.16741	-21	11	0.03688	0.2569
YCR054C	-39	70	0.24555	0.79483	-7	48	0.59611	0.71545	-25	27	0.24515	0.80009	-39	-17	0.06385	0.15406	-18	14	0.05549	0.32187
YCR054C	-43	34	0.20218	0.51222	-15	69	0.43573	0.8572	-23	2	0.29348	0.32562	-42	42	0.0436	0.9122	-15	23	0.0862	0.53562
YCR060W	-26	8	0.42845	0.19988	-85	15	0.00425	0.28466	-16	-1	0.50341	0.26339	-15	5	0.43217	0.51846	26	21	0.92646	0.48812
YCR060W	-46	-4	0.17223	0.07596	35	30	0.91986	0.50862	-18	-12	0.43879	0.11032	-14	37	0.45575	0.89034	4	49	0.57033	0.91208
YCR061W	-5	61	0.6841	0.74216	-31	13	0.1483	0.255	-6	22	0.78185	0.72965	-26	-6	0.21401	0.31722	-1	13	0.42543	0.29801
YCR061W	-16	49	0.5596	0.65289	-16	9	0.41515	0.20085	-15	9	0.53624	0.47754	-6	14	0.62581	0.66586	-30	-13	0.01096	0.01587
YCR063W	-90	34	0.03017	0.51222	7	46	0.79294	0.69544	-34	29	0.09528	0.82288	4	8	0.79772	0.56943	-6	11	0.26775	0.2569
YCR063W	-103	36	0.01916	0.5331	6	85	0.7827	0.91354	-23	36	0.29348	0.88226	7	63	0.83396	0.95501	-25	21	0.01963	0.48812
YCR064C	-49	12	0.14733	0.24658	-24	10	0.26109	0.21338	-8	14	0.73729	0.58297	-14	-28	0.45575	0.05787	1	30	0.48401	0.6852
YCR064C	-59	3	0.08915	0.14331	-23	18	0.27891	0.32754	-23	-6	0.29348	0.18589	9	-15	0.8549	0.17869	-4	19	0.32701	0.44062
YCR072C	7209	2327	0.99139	0.99701	5422	188	0.99517	0.98976	250	252	0.98962	0.99487	8051	57939	0.99861	0.99976	2990	24728	0.9976	0.99977
YCR072C	7524	2474	0.99173	0.99736	4995	190	0.99448	0.98999	222	257	0.98928	0.99498	7929	56100	0.9985	0.99965	2975	22756	0.99748	0.99965
YCR073W-A	50	147	0.90854	0.96855	-28	49	0.18889	0.72579	0	50	0.87166	0.94597	-12	4	0.50017	0.50132	-1	25	0.42543	0.58346
YCR073W-A	49	151	0.90797	0.97142	-27	89	0.20406	0.92527	15	61	0.95828	0.96512	-24	-14	0.24657	0.19295	-8	24	0.2174	0.55811
YCR075C	-60	-8	0.08422	0.0452	-293	12	0.00022	0.24085	-48	-8	0.01709	0.15614	-33	-25	0.11954	0.07513	16	18	0.8334	0.41584
YCR075C	-52	-8	0.12644	0.0452	-12	34	0.49701	0.56173	-49	-22	0.01493	0.03989	-13	-35	0.47831	0.02842	7	19	0.65528	0.44062
YCR076C	-35	26	0.29925	0.42558	18	105	0.8679	0.9532	-18	24	0.43879	0.76179	-25	6	0.22989	0.53549	-14	30	0.09796	0.6852
YCR076C	-30	40	0.37314	0.56947	14	60	0.84663	0.80961	-5	18	0.80282	0.66115	13	15	0.88931	0.68012	-17	12	0.06474	0.27574
YCR077C	-42	14	0.21308	0.27366	-3	46	0.66383	0.69544	-9	8	0.71153	0.45965	-15	19	0.43217	0.73858	-6	21	0.26775	0.48812
YCR077C	-35	5	0.29925	0.16442	-21	20	0.31708	0.35559	-15	-8	0.53624	0.15614	-9	-5	0.5623	0.33517	-8	22	0.2174	0.51301
YCR079W	-71	2	0.05473	0.13115	-19	28	0.35709	0.48103	-28	3	0.1852	0.34488	-31	13	0.14359	0.65044	8	14	0.68029	0.32187
YCR079W	-53	10	0.12002	0.2226	-12	17	0.49701	0.31352	-9	12	0.71153	0.54125	-12	20	0.50017	0.74962	-60	-25	0.00114	0.00353
YCR081W	-61	-9	0.08055	0.03947	-15	-16	0.43573	0.02046	-30	-31	0.15272	0.01424	-35	-16	0.09676	0.16741	-9	28	0.19079	0.64501
YCR081W	-76	-13	0.04693	0.0218	-22	-10	0.29799	0.03839	-37	-6	0.06861	0.18589	-24	-22	0.24657	0.1009	5	35	0.60059	0.76729
YCR082W	-41	18	0.22352	0.32426	11	110	0.82674	0.95976	-13	33	0.59995	0.86015	-17	23	0.38626	0.78771	-7	2	0.24195	0.10812
YCR082W	-35	31	0.29925	0.48215	5	92	0.77316	0.93182	2	36	0.89218	0.88226	-32	11	0.13128	0.61592	-16	6	0.07456	0.16499
YCR083W	-37	22	0.27148	0.37555	-19	33	0.35709	0.54828	-3	17	0.83462	0.64246	-20	4	0.32067	0.50132	-7	20	0.24195	0.46688
YCR083W	-41	25	0.22352	0.41296	-9	57	0.5607	0.78972	-6	5	0.78185	0.39012	-57	22	0.00839	0.77413	-10	21	0.17001	0.48812
YCR094W	-13	49	0.5969	0.65289	-12	-10	0.49701	0.03839	37	-3	0.97697	0.23022	-37	-3	0.07973	0.37245	-1	12	0.42543	0.27574
YCR094W	5	61	0.765	0.74216	-28	8	0.18889	0.18808	-7	9	0.76065	0.47754	-25	-17	0.22989	0.15406	-8	11	0.2174	0.2569
YCR096C	-38	6	0.25943	0.17636	5	69	0.77316	0.8572	-16	-7	0.50341	0.16981	11	21	0.87343	0.76182	-15	0	0.0862	0.08495
YCR096C	-34	9	0.31589	0.21113	9	74	0.81248	0.87594	-14	2	0.5661	0.32562	-58	3	0.00759	0.48256	-7	-6	0.24195	0.04213
YCR102W-A	6	63	0.77349	0.75547	-25	22	0.24005	0.38698	-35	-15	0.08513	0.08639	-6	-17	0.62581	0.15406	-4	13	0.32701	0.29801
YCR102W-A	-35	46	0.29925	0.62685	-21	43	0.31708	0.67038	-26	-16	0.22361	0.07829	-15	-23	0.43217	0.0925	0	12	0.45375	0.27574
YCR104W	-34	23	0.31589	0.38772	-19	32	0.35709	0.53541	-24	-14	0.26817	0.09402	-13	-22	0.47831	0.1009	n	n	n	n
YCR104W	-28	32	0.4008	0.4942	14	53	0.84663	0.76086	-17	-7	0.47059	0.16981	-7	-9	0.60326	0.26659	-6	-3	0.26775	0.05948
YCR105W	-33	21	0.33	0.36247	-63	19	0.01	0.34053	-17	11	0.47059	0.5188	-15	12	0.43217	0.63099	5	37	0.60059	0.79812
YCR105W	-44	24	0.19196	0.40137	-7	20	0.59611	0.35559	-24	3	0.26817	0.34488	-13	42	0.47831	0.9122	26	25	0.92646	0.58346
YCR106W	-26	14	0.42845	0.27366	-11	18	0.51954	0.32754	-3	48	0.83462	0.94141	-18	11	0.3652	0.61592	-2	24	0.39175	0.55811
YCR106W	1	30	0.73482	0.47114	-50	-27	0.02736	0.00609	-39	-6	0.05288	0.18589	-6	21	0.62581	0.76182	7	24	0.65528	0.55811
YDL001W	-29	85	0.38726	0.86494	-15	47	0.43573	0.70452	-10	0	0.68429	0.28447	-18	-8	0.3652	0.28374	-3	14	0.35795	0.32187
YDL001W	-12	94	0.60917	0.89489	-32	38	0.136	0.61243	-6	15	0.78185	0.60303	-26	-9	0.21401	0.26659	-5	13	0.29824	0.29801
YDL002C	-24	46	0.45496	0.62685	-12	57	0.49701	0.78972	3	67	0.90289	0.96991	-32	10	0.13128	0.60142	13	13	0.78625	0.29801
YDL002C	-18	74	0.5331	0.81594	-13	46	0.47516	0.69544	4	56	0.91201	0.95794	26	13	0.9504	0.65044	7	10	0.65528	0.23544
YDL004W	8	87	0.78852	0.87137	-34	20	0.11738	0.35559	-33	-13	0.1069	0.10109	15	29	0.90657	0.84029	-9	27	0.19079	0.62537
YDL004W	8	67	0.78852	0.779	-40	45	0.06932	0.68705	-8	13	0.73729	0.56371	-24	20	0.24657	0.74962	6	28	0.62811	0.64501
YDL007W	-7	45	0.66494	0.61767	0	19	0.70935	0.34053	-8	31	0.73729	0.84271	-1	7	0.71855	0.55091	-14	16	0.09796	0.368
YDL007W	30	99	0.87366	0.90935	0	50	0.70935	0.73419	-14	31	0.5661	0.84271	29	9	0.95777	0.58646	-10	4	0.17001	0.13553
YDL008W	-23	48	0.46815	0.64566	-13	45	0.47516	0.68705	-30	13	0.15272	0.56371	6	9	0.8228	0.58646	2	9	0.51427	0.21705
YDL008W	2	88	0.74274	0.87527	-29	47	0.17475	0.70452	8	3	0.93628	0.34488	-22	6	0.28155	0.53549	7	20	0.65528	0.46688
YDL009C	-32	25	0.34411	0.41296	9	82	0.81248	0.9048	-14	15	0.5661	0.60303	-10	12	0.54286	0.63099	2	20	0.51427	0.46688
YDL009C	-21	46	0.49512	0.62685	-21	11	0.31708	0.22545	-19	22	0.40722	0.72965	-20	-5	0.32067	0.33517	-3	24	0.35795	0.55811
YDL010W	-17	35	0.54652	0.52208	-8	27	0.57852	0.46481	-21	1	0.34864	0.30396	6	-17	0.8228	0.15406	7	9	0.65528	0.21705
YDL010W	-23	9	0.46815	0.21113	-17	-8	0.39526	0.04771	-31	-10	0.1338	0.13289	-8	-39	0.58405	0.01875	2	12	0.51427	0.27574
YDL011C	3	78	0.74985	0.83878	-23	51	0.27891	0.74384	-27	-12	0.20344	0.11032	-14	10	0.45575	0.60142	10	22	0.72539	0.51301
YDL011C	-1	85	0.72105	0.86494	-13	23	0.47516	0.40388	-18	7	0.43879	0.4372	-21	-6	0.30065	0.31722	16	25	0.8334	0.58346
YDL012C	33	94	0.88112	0.89489	-18	56	0.37744	0.78351	-15	24	0.53624	0.76179	-17	23	0.38626	0.78771	-11	14	0.14786	0.32187
YDL012C	42	107	0.8973	0.92771	-13	40	0.47516	0.63612	-14	14	0.5661	0.58297	-16	62	0.40835	0.95397	1	2	0.48401	0.10812
YDL013W	-12	63	0.60917	0.75547	29	67	0.90411	0.8464	-13	9	0.59995	0.47754	-18	-30	0.3652	0.0489	-9	24	0.19079	0.55811
YDL013W	-1	111	0.72105	0.93436	-31	31	0.1483	0.52379	-14	38	0.5661	0.89343	-14	-43	0.45575	0.01127	-5	31	0.29824	0.70221
YDL015C	-37	-12	0.27148	0.02581	-13	37	0.47516	0.59933	-26	11	0.22361	0.5188	-15	22	0.43217	0.77413	-14	29	0.09796	0.66693
YDL015C	-32	-18	0.34411	0.01101	-31	18	0.1483	0.32754	-28	-8	0.1852	0.15614	-6	-29	0.62581	0.05315	9	19	0.70404	0.44062
YDL017W	-5	36	0.6841	0.5331	-18	40	0.37744	0.63612	-6	40	0.78185	0.9046	-7	5	0.60326	0.51846	16	38	0.8334	0.80965
YDL017W	-16	66	0.5596	0.77292	-14	17	0.45504	0.31352	-10	41	0.68429	0.90984	-7	11	0.60326	0.61592	-3	15	0.35795	0.3422
YDL019C	2	42	0.74274	0.58875	45	81	0.93274	0.90193	-13	8	0.59995	0.45965	8	43	0.84501	0.91612	9	43	0.70404	0.86526
YDL019C	-32	16	0.34411	0.2981	-9	15	0.5607	0.28466	1	4	0.88203	0.36893	-13	35	0.47831	0.88068	10	49	0.72539	0.91208
YDL020C	4	76	0.75857	0.8273	-26	44	0.22372	0.679	-7	50	0.76065	0.94597	-14	30	0.45575	0.84915	-10	23	0.17001	0.53562
YDL020C	-23	75	0.46815	0.82099	-6	23	0.61335	0.40388	-14	3	0.5661	0.34488	-15	-19	0.43217	0.12748	6	22	0.62811	0.51301
YDL021W	98	104	0.93861	0.92197	-19	71	0.35709	0.86548	-9	36	0.71153	0.88226	-33	10	0.11954	0.60142	4	3	0.57033	0.1208
YDL021W	29	112	0.87022	0.9362	-4	57	0.64842	0.78972	12	58	0.95121	0.96079	-6	14	0.62581	0.66586	-13	10	0.11224	0.23544
YDL022W	1	103	0.73482	0.91956	-1	26	0.69314	0.44918	-22	6	0.31878	0.416	-18	1	0.3652	0.44379	-8	30	0.2174	0.6852
YDL022W	-3	98	0.70361	0.90567	-30	42	0.16153	0.65957	-19	12	0.40722	0.54125	0	120	0.73443	0.98101	22	25	0.89849	0.58346
YDL023C	15	88	0.82788	0.87527	-11	39	0.51954	0.62451	8	32	0.93628	0.85343	-2	8	0.70014	0.56943	-13	8	0.11224	0.19981
YDL023C	30	119	0.87366	0.94606	-10	50	0.53977	0.73419	5	29	0.91907	0.82288	-21	6	0.30065	0.53549	-17	-5	0.06474	0.04761
YDL025C	20	115	0.84578	0.93998	-26	24	0.22372	0.42044	-17	37	0.47059	0.88716	-39	-21	0.06385	0.11011	17	33	0.84813	0.73361
YDL025C	2	133	0.74274	0.96029	26	115	0.8956	0.96389	1	44	0.88203	0.92432	-5	-5	0.64549	0.33517	10	54	0.72539	0.93697
YDL026W	-3	33	0.70361	0.50327	-7	41	0.59611	0.6483	-6	40	0.78185	0.9046	-17	25	0.38626	0.8075	-18	0	0.05549	0.08495
YDL026W	7	73	0.78164	0.81055	-6	50	0.61335	0.73419	-11	20	0.65819	0.69591	-24	-6	0.24657	0.31722	-3	2	0.35795	0.10812
YDL027C	252	98	0.95938	0.90567	31	46	0.90871	0.69544	-21	3	0.34864	0.34488	-22	34	0.28155	0.87504	-1	18	0.42543	0.41584
YDL027C	298	91	0.96259	0.88399	34	21	0.91687	0.371	4	35	0.91201	0.87565	-35	-5	0.09676	0.33517	-3	31	0.35795	0.70221
YDL030W	-7	54	0.66494	0.69213	12	53	0.83329	0.76086	-20	12	0.37679	0.54125	-47	18	0.0245	0.72477	0	2	0.45375	0.10812
YDL030W	3	59	0.74985	0.72782	22	79	0.88491	0.89583	-7	35	0.76065	0.87565	-27	13	0.19951	0.65044	-23	-3	0.02626	0.05948
YDL031W	15448	184	0.99483	0.98014	2505	141	0.99149	0.97999	177	60	0.98837	0.96375	21	35	0.93683	0.88068	-4	4	0.32701	0.13553
YDL031W	12725	168	0.99426	0.97739	2507	130	0.9916	0.97424	190	62	0.98871	0.96626	-19	21	0.34115	0.76182	-14	-11	0.09796	0.02249
YDL033C	-6	50	0.67527	0.66069	-25	35	0.24005	0.57323	-6	25	0.78185	0.77672	-12	52	0.50017	0.93591	23	20	0.90614	0.46688
YDL033C	23	53	0.85381	0.68514	-10	37	0.53977	0.59933	-2	0	0.84921	0.28447	-15	11	0.43217	0.61592	17	16	0.84813	0.368
YDL034W	1	41	0.73482	0.5798	-5	12	0.63014	0.24085	-9	13	0.71153	0.56371	-36	17	0.08767	0.71085	2	3	0.51427	0.1208
YDL034W	16	73	0.83281	0.81055	3	27	0.74879	0.46481	6	37	0.92523	0.88716	-14	12	0.45575	0.63099	-1	10	0.42543	0.23544
YDL035C	-25	9	0.44211	0.21113	-27	-6	0.20406	0.0607	-14	16	0.5661	0.62502	-15	-42	0.43217	0.01254	8	12	0.68029	0.27574
YDL035C	-24	4	0.45496	0.15364	-31	-7	0.1483	0.05334	-7	7	0.76065	0.4372	-20	-15	0.32067	0.17869	-5	14	0.29824	0.32187
YDL038C	-37	20	0.27148	0.34893	-10	1	0.53977	0.1122	-24	15	0.26817	0.60303	-29	-36	0.17167	0.02542	-13	6	0.11224	0.16499
YDL038C	-42	23	0.21308	0.38772	-22	32	0.29799	0.53541	-27	1	0.20344	0.30396	-11	-3	0.52376	0.37245	3	7	0.54224	0.18291
YDL039C	2	61	0.74274	0.74216	-32	32	0.136	0.53541	-1	31	0.86152	0.84271	-17	25	0.38626	0.8075	-12	9	0.12765	0.21705
YDL039C	-2	50	0.71244	0.66069	-15	32	0.43573	0.53541	-15	33	0.53624	0.86015	9	6	0.8549	0.53549	-21	-1	0.03688	0.07387
YDL042C	-37	26	0.27148	0.42558	-8	44	0.57852	0.679	-9	-1	0.71153	0.26339	-23	-3	0.26326	0.37245	-14	9	0.09796	0.21705
YDL042C	-13	70	0.5969	0.79483	-11	50	0.51954	0.73419	-26	19	0.22361	0.67836	-6	2	0.62581	0.46404	-16	10	0.07456	0.23544
YDL043C	-11	58	0.62145	0.72128	4	49	0.76178	0.72579	-22	25	0.31878	0.77672	-8	-4	0.58405	0.35254	-8	2	0.2174	0.10812
YDL043C	-12	55	0.60917	0.69982	-13	54	0.47516	0.76983	12	29	0.95121	0.82288	-45	12	0.03164	0.63099	-4	8	0.32701	0.19981
YDL044C	-19	28	0.52117	0.44899	-374	13	0.00011	0.255	-92	-10	0.00113	0.13289	6	11	0.8228	0.61592	-10	1	0.17001	0.09648
YDL044C	-32	3	0.34411	0.14331	1025	147	0.98643	0.98252	-70	-6	0.00296	0.18589	-6	11	0.62581	0.61592	1	10	0.48401	0.23544
YDL045C	-17	27	0.54652	0.4366	-7	26	0.59611	0.44918	-6	34	0.78185	0.86927	-20	-10	0.32067	0.2491	-2	-22	0.39175	0.00536
YDL045C	-13	38	0.5969	0.55261	-32	26	0.136	0.44918	-14	25	0.5661	0.77672	-19	21	0.34115	0.76182	-9	-15	0.19079	0.01278
YDL045W-A	-53	0	0.12002	0.10923	-25	37	0.24005	0.59933	-45	11	0.02382	0.5188	-46	-16	0.02715	0.16741	-12	-5	0.12765	0.04761
YDL045W-A	-42	18	0.21308	0.32426	13	111	0.84088	0.96091	-6	5	0.78185	0.39012	-25	-18	0.22989	0.14129	-2	4	0.39175	0.13553
YDL046W	-18	55	0.5331	0.69982	-31	20	0.1483	0.35559	-9	38	0.71153	0.89343	-4	11	0.6677	0.61592	-25	-20	0.01963	0.0073
YDL046W	-29	17	0.38726	0.30866	32	143	0.91193	0.9808	-25	19	0.24515	0.67836	-13	3	0.47831	0.48256	-23	16	0.02626	0.368
YDL047W	-46	-10	0.17223	0.03465	-10	39	0.53977	0.62451	-19	7	0.40722	0.4372	-12	-19	0.50017	0.12748	-3	11	0.35795	0.2569
YDL047W	-21	29	0.49512	0.46058	-25	45	0.24005	0.68705	-20	-14	0.37679	0.09402	-16	16	0.40835	0.69681	2	15	0.51427	0.3422
YDL048C	-43	22	0.20218	0.37555	4	27	0.76178	0.46481	-18	29	0.43879	0.82288	-23	-18	0.26326	0.14129	-8	104	0.2174	0.98732
YDL048C	-28	19	0.4008	0.33803	-15	16	0.43573	0.29972	-22	17	0.31878	0.64246	-10	16	0.54286	0.69681	n	n	n	n
YDL049C	-4	13	0.6942	0.26047	16	60	0.85858	0.80961	-27	0	0.20344	0.28447	0	15	0.73443	0.68012	2	17	0.51427	0.39301
YDL049C	9	17	0.79414	0.30866	-1	64	0.69314	0.83157	-9	-2	0.71153	0.24549	2	29	0.76734	0.84029	13	-6	0.78625	0.04213
YDL050C	-7	51	0.66494	0.66873	-11	16	0.51954	0.29972	-23	14	0.29348	0.58297	2	12	0.76734	0.63099	-12	-10	0.12765	0.02591
YDL050C	-29	47	0.38726	0.63614	-4	33	0.64842	0.54828	-29	-1	0.16822	0.26339	15	3	0.90657	0.48256	-2	9	0.39175	0.21705
YDL051W	1655	1832	0.98221	0.99632	n	n	n	n	n	n	n	n	18	131	0.92336	0.98285	10	37	0.72539	0.79812
YDL051W	2099	3466	0.98393	0.9985	n	n	n	n	n	n	n	n	40	90	0.97261	0.97215	6	25	0.62811	0.58346
YDL052C	-11	52	0.62145	0.67733	-10	45	0.53977	0.68705	-22	9	0.31878	0.47754	-7	5	0.60326	0.51846	2	4	0.51427	0.13553
YDL052C	-9	56	0.6436	0.70808	-6	34	0.61335	0.56173	-9	24	0.71153	0.76179	-23	16	0.26326	0.69681	-8	18	0.2174	0.41584
YDL053C	n	n	n	n	n	n	n	n	n	n	n	n	-23	-18	0.26326	0.14129	-5	9	0.29824	0.21705
YDL053C	-39	2	0.24555	0.13115	7	119	0.79294	0.96746	-19	5	0.40722	0.39012	-46	10	0.02715	0.60142	-22	12	0.03082	0.27574
YDL054C	223	41	0.95697	0.5798	35	31	0.91986	0.52379	-16	10	0.50341	0.49794	-37	-14	0.07973	0.19295	-9	8	0.19079	0.19981
YDL054C	209	44	0.95582	0.6078	22	31	0.88491	0.52379	-16	10	0.50341	0.49794	9	1	0.8549	0.44379	1	8	0.48401	0.19981
YDL055C	-26	-2	0.42845	0.09213	17	78	0.86261	0.89215	-22	2	0.31878	0.32562	-41	-9	0.04982	0.26659	-8	21	0.2174	0.48812
YDL055C	-21	5	0.49512	0.16442	46	97	0.93343	0.94274	-24	19	0.26817	0.67836	-49	48	0.02002	0.92739	7	0	0.65528	0.08495
YDL056W	-52	37	0.12644	0.54297	-27	22	0.20406	0.38698	-26	-6	0.22361	0.18589	-31	0	0.14359	0.42722	-5	-3	0.29824	0.05948
YDL056W	-27	64	0.41422	0.76179	-27	28	0.20406	0.48103	-28	29	0.1852	0.82288	-37	-9	0.07973	0.26659	-14	11	0.09796	0.2569
YDL060W	-22	9	0.4825	0.21113	3	102	0.74879	0.94918	-8	41	0.73729	0.90984	-28	32	0.18616	0.86181	-9	1	0.19079	0.09648
YDL060W	-30	15	0.37314	0.28605	-2	66	0.67808	0.84214	-18	35	0.43879	0.87565	6	34	0.8228	0.87504	-11	16	0.14786	0.368
YDL062W	-8	102	0.65393	0.91669	-35	29	0.106	0.49494	-19	30	0.40722	0.83485	-3	33	0.683	0.86848	12	27	0.76729	0.62537
YDL062W	-23	44	0.46815	0.6078	-42	11	0.06058	0.22545	-16	23	0.50341	0.74675	-31	15	0.14359	0.68012	17	43	0.84813	0.86526
YDL063C	-105	2	0.01755	0.13115	-25	37	0.24005	0.59933	-16	49	0.50341	0.94346	-16	22	0.40835	0.77413	-1	16	0.42543	0.368
YDL063C	-44	12	0.19196	0.24658	-37	22	0.09048	0.38698	-28	26	0.1852	0.78926	-19	14	0.34115	0.66586	10	26	0.72539	0.60687
YDL064W	-25	35	0.44211	0.52208	13	110	0.84088	0.95976	-9	14	0.71153	0.58297	12	54	0.88137	0.93993	22	38	0.89849	0.80965
YDL064W	-35	37	0.29925	0.54297	-41	34	0.06426	0.56173	-6	19	0.78185	0.67836	7	11	0.83396	0.61592	18	41	0.86138	0.84391
YDL065C	-67	43	0.06322	0.59988	-23	52	0.27891	0.75293	-26	-19	0.22361	0.05561	-32	-9	0.13128	0.26659	-15	19	0.0862	0.44062
YDL065C	-66	66	0.06597	0.77292	-24	8	0.26109	0.18808	-21	14	0.34864	0.58297	-21	-26	0.30065	0.06869	-12	2	0.12765	0.10812
YDL066W	-48	25	0.15421	0.41296	-37	8	0.09048	0.18808	-28	27	0.1852	0.80009	-15	24	0.43217	0.79726	-4	27	0.32701	0.62537
YDL066W	-50	6	0.13952	0.17636	-1	65	0.69314	0.83708	-19	20	0.40722	0.69591	1	12	0.75135	0.63099	6	25	0.62811	0.58346
YDL067C	-29	27	0.38726	0.4366	-44	25	0.05035	0.43504	-9	-10	0.71153	0.13289	-14	-5	0.45575	0.33517	10	50	0.72539	0.91813
YDL067C	-14	44	0.58531	0.6078	-30	13	0.16153	0.255	-24	-34	0.26817	0.01014	9	11	0.8549	0.61592	5	7	0.60059	0.18291
YDL076C	-25	35	0.44211	0.52208	-5	54	0.63014	0.76983	-40	15	0.04672	0.60303	30	80	0.95961	0.96824	2	44	0.51427	0.87588
YDL076C	-49	10	0.14733	0.2226	17	116	0.86261	0.9647	-19	28	0.40722	0.81399	13	23	0.88931	0.78771	12	36	0.76729	0.78237
YDL078C	23465	874	0.99713	0.99357	16219	332	0.99712	0.99517	19938	257	0.99863	0.99498	24112	2898	0.99965	0.9962	20046	935	0.99988	0.99554
YDL078C	23090	962	0.9969	0.99368	16698	319	0.99724	0.99505	18760	294	0.9984	0.99589	27993	3592	0.99976	0.99654	20429	936	1	0.99566
YDL079C	-22	8	0.4825	0.19988	-21	25	0.31708	0.43504	-40	13	0.04672	0.56371	-2	65	0.70014	0.95662	-9	14	0.19079	0.32187
YDL079C	-43	6	0.20218	0.17636	1	38	0.72441	0.61243	-22	22	0.31878	0.72965	-5	16	0.64549	0.69681	10	18	0.72539	0.41584
YDL081C	24	111	0.85702	0.93436	-12	42	0.49701	0.65957	-12	23	0.63095	0.74675	30	234	0.95961	0.98883	9	83	0.70404	0.98127
YDL081C	32	132	0.8786	0.95926	1	34	0.72441	0.56173	-12	27	0.63095	0.80009	-2	129	0.70014	0.98262	14	78	0.80269	0.97807
YDL083C	-28	27	0.4008	0.4366	-8	30	0.57852	0.50862	4	25	0.91201	0.77672	-20	59	0.32067	0.94937	4	16	0.57033	0.368
YDL083C	-56	-3	0.10338	0.08353	-5	47	0.63014	0.70452	-24	16	0.26817	0.62502	-36	64	0.08767	0.9557	9	33	0.70404	0.73361
YDL084W	14	102	0.82226	0.91669	-19	13	0.35709	0.255	-27	-6	0.20344	0.18589	-7	-26	0.60326	0.06869	-14	14	0.09796	0.32187
YDL084W	32	112	0.8786	0.9362	0	67	0.70935	0.8464	-17	6	0.47059	0.416	12	-20	0.88137	0.11839	-6	18	0.26775	0.41584
YDL085W	-70	-3	0.05691	0.08353	-53	8	0.02126	0.18808	-13	6	0.59995	0.416	-31	4	0.14359	0.50132	-14	25	0.09796	0.58346
YDL085W	-99	-6	0.02214	0.05874	-7	54	0.59611	0.76983	-24	10	0.26817	0.49794	19	29	0.92831	0.84029	2	35	0.51427	0.76729
YDL086W	-16	59	0.5596	0.72782	-21	50	0.31708	0.73419	-22	29	0.31878	0.82288	-14	10	0.45575	0.60142	4	28	0.57033	0.64501
YDL086W	-11	66	0.62145	0.77292	-16	48	0.41515	0.71545	0	30	0.87166	0.83485	-13	16	0.47831	0.69681	5	20	0.60059	0.46688
YDL087C	75	119	0.93034	0.94606	15	19	0.85341	0.34053	-16	41	0.50341	0.90984	n	n	n	n	-10	11	0.17001	0.2569
YDL087C	54	95	0.91382	0.89764	3	36	0.74879	0.58553	-21	42	0.34864	0.91565	n	n	n	n	-8	23	0.2174	0.53562
YDL088C	1	108	0.73482	0.9292	-30	47	0.16153	0.70452	-20	6	0.37679	0.416	1	-8	0.75135	0.28374	-6	22	0.26775	0.51301
YDL088C	9	94	0.79414	0.89489	1	44	0.72441	0.679	-3	17	0.83462	0.64246	-23	-15	0.26326	0.17869	-5	13	0.29824	0.29801
YDL090C	11	70	0.80631	0.79483	-14	41	0.45504	0.6483	-14	19	0.5661	0.67836	n	n	n	n	2	24	0.51427	0.55811
YDL090C	10	98	0.80045	0.90567	10	62	0.81984	0.82087	-30	46	0.15272	0.93332	2	155	0.76734	0.98481	-11	19	0.14786	0.44062
YDL091C	25	85	0.8592	0.86494	27	80	0.89951	0.89974	7	50	0.93104	0.94597	-15	16	0.43217	0.69681	2	21	0.51427	0.48812
YDL091C	50	96	0.90854	0.9004	11	58	0.82674	0.79673	2	31	0.89218	0.84271	6	-11	0.8228	0.23392	-4	23	0.32701	0.53562
YDL092W	13	60	0.81721	0.73585	-12	22	0.49701	0.38698	-10	29	0.68429	0.82288	-23	58	0.26326	0.94718	0	30	0.45375	0.6852
YDL092W	49	162	0.90797	0.9759	-11	16	0.51954	0.29972	-10	22	0.68429	0.72965	-8	65	0.58405	0.95662	8	8	0.68029	0.19981
YDL094C	-2	80	0.71244	0.84704	-8	13	0.57852	0.255	1	22	0.88203	0.72965	-23	3	0.26326	0.48256	-12	16	0.12765	0.368
YDL094C	-3	65	0.70361	0.76718	-18	23	0.37744	0.40388	-4	-1	0.81912	0.26339	-24	0	0.24657	0.42722	4	21	0.57033	0.48812
YDL096C	35	128	0.88525	0.95559	-16	24	0.41515	0.42044	-4	11	0.81912	0.5188	-12	29	0.50017	0.84029	-7	23	0.24195	0.53562
YDL096C	20	76	0.84578	0.8273	-3	41	0.66383	0.6483	-10	18	0.68429	0.66115	-30	61	0.15671	0.95282	-5	10	0.29824	0.23544
YDL098C	-9	61	0.6436	0.74216	-19	20	0.35709	0.35559	8	48	0.93628	0.94141	-40	12	0.0558	0.63099	-6	17	0.26775	0.39301
YDL098C	-10	71	0.63293	0.8016	-28	3	0.18889	0.12979	1	15	0.88203	0.60303	-9	-12	0.5623	0.21988	-18	19	0.05549	0.44062
YDL099W	10	83	0.80045	0.85783	17	108	0.86261	0.95769	8	68	0.93628	0.97139	n	n	n	n	-1	0	0.42543	0.08495
YDL099W	30	95	0.87366	0.89764	110	121	0.96275	0.9693	1	41	0.88203	0.90984	n	n	n	n	1	6	0.48401	0.16499
YDL100C	-27	55	0.41422	0.69982	17	90	0.86261	0.92756	4	8	0.91201	0.45965	-46	-20	0.02715	0.11839	-12	-1	0.12765	0.07387
YDL100C	-15	73	0.57292	0.81055	-14	33	0.45504	0.54828	0	20	0.87166	0.69591	-6	-10	0.62581	0.2491	7	16	0.65528	0.368
YDL101C	17	78	0.83786	0.83878	-6	36	0.61335	0.58553	-12	6	0.63095	0.416	-8	23	0.58405	0.78771	-11	1	0.14786	0.09648
YDL101C	109	159	0.94113	0.97487	176	31	0.96941	0.52379	-16	21	0.50341	0.71176	-30	42	0.15671	0.9122	0	6	0.45375	0.16499
YDL102W	-46	23	0.17223	0.38772	1	48	0.72441	0.71545	-33	-21	0.1069	0.04638	-20	4	0.32067	0.50132	0	10	0.45375	0.23544
YDL102W	-45	27	0.18255	0.4366	-35	14	0.106	0.26983	-23	-21	0.29348	0.04638	-14	-17	0.45575	0.15406	6	26	0.62811	0.60687
YDL103C	-26	40	0.42845	0.56947	-14	37	0.45504	0.59933	-11	16	0.65819	0.62502	-29	-22	0.17167	0.1009	-2	6	0.39175	0.16499
YDL103C	-32	17	0.34411	0.30866	-8	27	0.57852	0.46481	-17	10	0.47059	0.49794	-44	-27	0.0352	0.06316	-5	7	0.29824	0.18291
YDL106C	-21	17	0.49512	0.30866	-11	12	0.51954	0.24085	-15	18	0.53624	0.66115	-5	-20	0.64549	0.11839	-11	10	0.14786	0.23544
YDL106C	-6	36	0.67527	0.5331	-35	20	0.106	0.35559	-14	6	0.5661	0.416	-29	15	0.17167	0.68012	-9	-4	0.19079	0.05263
YDL107W	35	61	0.88525	0.74216	-9	29	0.5607	0.49494	-14	32	0.5661	0.85343	-23	42	0.26326	0.9122	2	0	0.51427	0.08495
YDL107W	29	55	0.87022	0.69982	-4	25	0.64842	0.43504	-16	26	0.50341	0.78926	-15	21	0.43217	0.76182	-17	10	0.06474	0.23544
YDL109C	9	114	0.79414	0.93861	-10	36	0.53977	0.58553	-24	51	0.26817	0.94814	-17	-11	0.38626	0.23392	1	17	0.48401	0.39301
YDL109C	-5	87	0.6841	0.87137	-13	38	0.47516	0.61243	-31	32	0.1338	0.85343	0	3	0.73443	0.48256	5	39	0.60059	0.82153
YDL110C	0	68	0.72851	0.7845	-3	52	0.66383	0.75293	-4	34	0.81912	0.86927	34	32	0.96582	0.86181	3	15	0.54224	0.3422
YDL110C	15	82	0.82788	0.85415	-14	29	0.45504	0.49494	0	27	0.87166	0.80009	-81	-67	0.00161	0.00115	-1	12	0.42543	0.27574
YDL111C	18	117	0.84084	0.94228	40	148	0.92848	0.98286	-15	26	0.53624	0.78926	-17	6	0.38626	0.53549	-11	18	0.14786	0.41584
YDL111C	-32	60	0.34411	0.73585	-13	39	0.47516	0.62451	-9	32	0.71153	0.85343	-36	6	0.08767	0.53549	8	10	0.68029	0.23544
YDL113C	-32	57	0.34411	0.716	-26	14	0.22372	0.26983	-6	14	0.78185	0.58297	-41	-4	0.04982	0.35254	7	30	0.65528	0.6852
YDL113C	-18	59	0.5331	0.72782	-30	-23	0.16153	0.00965	-8	10	0.73729	0.49794	-5	-4	0.64549	0.35254	-8	6	0.2174	0.16499
YDL114W	-17	15	0.54652	0.28605	-14	25	0.45504	0.43504	-28	22	0.1852	0.72965	17	40	0.91876	0.90369	-12	-21	0.12765	0.00616
YDL114W	-20	18	0.50877	0.32426	-2	20	0.67808	0.35559	-15	13	0.53624	0.56371	-14	25	0.45575	0.8075	30	37	0.94176	0.79812
YDL115C	-6	61	0.67527	0.74216	0	52	0.70935	0.75293	-18	38	0.43879	0.89343	-8	50	0.58405	0.93153	-15	22	0.0862	0.51301
YDL115C	1	63	0.73482	0.75547	-22	64	0.29799	0.83157	-21	40	0.34864	0.9046	-21	45	0.30065	0.92164	-4	21	0.32701	0.48812
YDL116W	-29	16	0.38726	0.2981	-10	55	0.53977	0.77696	-13	13	0.59995	0.56371	-37	2	0.07973	0.46404	-10	11	0.17001	0.2569
YDL116W	-44	54	0.19196	0.69213	11	50	0.82674	0.73419	-15	27	0.53624	0.80009	-42	-18	0.0436	0.14129	-4	12	0.32701	0.27574
YDL117W	-13	51	0.5969	0.66873	-16	27	0.41515	0.46481	-10	37	0.68429	0.88716	-17	42	0.38626	0.9122	-5	4	0.29824	0.13553
YDL117W	1	44	0.73482	0.6078	-18	35	0.37744	0.57323	-15	31	0.53624	0.84271	-38	-1	0.07191	0.40789	-12	8	0.12765	0.19981
YDL118W	-30	12	0.37314	0.24658	32	72	0.91193	0.86962	-21	19	0.34864	0.67836	-7	-2	0.60326	0.38948	-16	1	0.07456	0.09648
YDL118W	-23	22	0.46815	0.37555	-25	30	0.24005	0.50862	-16	8	0.50341	0.45965	-43	20	0.03981	0.74962	-12	3	0.12765	0.1208
YDL119C	34	42	0.8833	0.58875	97	184	0.96079	0.98907	-17	43	0.47059	0.92056	-3	10	0.683	0.60142	-11	15	0.14786	0.3422
YDL119C	27	49	0.86586	0.65289	-10	27	0.53977	0.46481	-8	32	0.73729	0.85343	-9	29	0.5623	0.84029	-13	9	0.11224	0.21705
YDL120W	-37	21	0.27148	0.36247	-12	29	0.49701	0.49494	-23	1	0.29348	0.30396	-6	-10	0.62581	0.2491	-23	2	0.02626	0.10812
YDL120W	-46	10	0.17223	0.2226	-41	13	0.06426	0.255	-13	11	0.59995	0.5188	-44	57	0.0352	0.94557	-23	-4	0.02626	0.05263
YDL123W	55	49	0.91462	0.65289	-3	47	0.66383	0.70452	2	57	0.89218	0.95953	5	12	0.81003	0.63099	-4	27	0.32701	0.62537
YDL123W	44	96	0.90074	0.9004	-8	43	0.57852	0.67038	0	61	0.87166	0.96512	-20	53	0.32067	0.9374	2	14	0.51427	0.32187
YDL124W	21112	2393	0.99644	0.99724	10782	77	0.99666	0.88813	1631	103	0.99418	0.98632	112	851	0.98826	0.99367	86	262	0.98823	0.99212
YDL124W	20131	2525	0.99586	0.99747	12082	174	0.99689	0.98769	1811	98	0.99475	0.98506	96	695	0.98768	0.99332	76	292	0.98664	0.99269
YDL125C	-2	167	0.71244	0.9767	-9	107	0.5607	0.95642	-5	196	0.80282	0.9935	-26	-2	0.21401	0.38948	11	13	0.74743	0.29801
YDL125C	9	184	0.79414	0.98014	-6	69	0.61335	0.8572	-8	162	0.73729	0.99111	-4	4	0.6677	0.50132	-7	6	0.24195	0.16499
YDL126C	-137	-1	0.00309	0.09959	-20	0	0.33536	0.10312	-29	-20	0.16822	0.05071	10	-17	0.8656	0.15406	18	17	0.86138	0.39301
YDL126C	-128	1	0.00642	0.12002	-14	28	0.45504	0.48103	-36	-16	0.07658	0.07829	-21	-2	0.30065	0.38948	-6	14	0.26775	0.32187
YDL127W	-31	4	0.35903	0.15364	-4	38	0.64842	0.61243	-23	-3	0.29348	0.23022	-6	33	0.62581	0.86848	0	5	0.45375	0.14912
YDL127W	-16	26	0.5596	0.42558	-16	45	0.41515	0.68705	-10	1	0.68429	0.30396	-52	-5	0.01438	0.33517	-8	0	0.2174	0.08495
YDL128W	-16	13	0.5596	0.26047	-4	55	0.64842	0.77696	-20	16	0.37679	0.62502	-21	7	0.30065	0.55091	-1	4	0.42543	0.13553
YDL128W	-4	31	0.6942	0.48215	46	86	0.93343	0.91641	2	15	0.89218	0.60303	-5	12	0.64549	0.63099	-5	8	0.29824	0.19981
YDL129W	-16	40	0.5596	0.56947	-23	25	0.27891	0.43504	-30	21	0.15272	0.71176	-25	47	0.22989	0.92578	-20	-9	0.04179	0.02911
YDL129W	-14	56	0.58531	0.70808	5	35	0.77316	0.57323	-30	21	0.15272	0.71176	-17	3	0.38626	0.48256	-6	-9	0.26775	0.02911
YDL130W	1	-2	0.73482	0.09213	195	119	0.97079	0.96746	-18	15	0.43879	0.60303	86	665	0.98596	0.99321	23	286	0.90614	0.99246
YDL130W	-9	76	0.6436	0.8273	n	n	n	n	-43	-51	0.03054	0.00182	69	630	0.98412	0.99309	35	282	0.9582	0.99234
YDL130W-A	17	81	0.83786	0.85094	7	28	0.79294	0.48103	-19	35	0.40722	0.87565	24	33	0.945	0.86848	9	21	0.70404	0.48812
YDL130W-A	10	54	0.80045	0.69213	-8	28	0.57852	0.48103	-7	43	0.76065	0.92056	-10	21	0.54286	0.76182	17	14	0.84813	0.32187
YDL131W	-7	18	0.66494	0.32426	-34	11	0.11738	0.22545	-5	27	0.80282	0.80009	-11	22	0.52376	0.77413	13	24	0.78625	0.55811
YDL131W	-41	14	0.22352	0.27366	-31	36	0.1483	0.58553	-28	26	0.1852	0.78926	2	14	0.76734	0.66586	-1	24	0.42543	0.55811
YDL132W	-21	33	0.49512	0.50327	-5	28	0.63014	0.48103	-6	33	0.78185	0.86015	-34	-5	0.10723	0.33517	-7	9	0.24195	0.21705
YDL132W	-12	50	0.60917	0.66069	-12	44	0.49701	0.679	-9	35	0.71153	0.87565	0	56	0.73443	0.94431	2	9	0.51427	0.21705
YDL134C	-44	-7	0.19196	0.05197	55	17	0.94194	0.31352	-44	-22	0.02712	0.03989	-25	2	0.22989	0.46404	11	23	0.74743	0.53562
YDL134C	-46	-4	0.17223	0.07596	24	-16	0.88997	0.02046	-38	-7	0.06063	0.16981	2	1	0.76734	0.44379	1	24	0.48401	0.55811
YDL135C	1	53	0.73482	0.68514	-5	15	0.63014	0.28466	-19	22	0.40722	0.72965	-3	-1	0.683	0.40789	11	27	0.74743	0.62537
YDL135C	-11	51	0.62145	0.66873	-12	52	0.49701	0.75293	-5	44	0.80282	0.92432	-7	-10	0.60326	0.2491	-16	14	0.07456	0.32187
YDL136W	-27	30	0.41422	0.47114	-19	-5	0.35709	0.06783	-11	29	0.65819	0.82288	-8	13	0.58405	0.65044	24	17	0.91459	0.39301
YDL136W	-47	-1	0.16201	0.09959	-37	1	0.09048	0.1122	-13	16	0.59995	0.62502	-23	-7	0.26326	0.2995	-9	29	0.19079	0.66693
YDL137W	-27	59	0.41422	0.72782	-14	37	0.45504	0.59933	-13	10	0.59995	0.49794	7	5	0.83396	0.51846	6	12	0.62811	0.27574
YDL137W	-6	33	0.67527	0.50327	-8	25	0.57852	0.43504	-13	22	0.59995	0.72965	4	40	0.79772	0.90369	10	15	0.72539	0.3422
YDL139C	113	74	0.94239	0.81594	-22	8	0.29799	0.18808	-9	22	0.71153	0.72965	-18	-9	0.3652	0.26659	3	36	0.54224	0.78237
YDL139C	93	32	0.937	0.4942	-8	32	0.57852	0.53541	12	196	0.95121	0.9935	-23	21	0.26326	0.76182	16	32	0.8334	0.71865
YDL142C	11	47	0.80631	0.63614	-14	43	0.45504	0.67038	-14	4	0.5661	0.36893	-4	17	0.6677	0.71085	13	12	0.78625	0.27574
YDL142C	5	20	0.765	0.34893	-25	33	0.24005	0.54828	-51	0	0.01105	0.28447	-21	-2	0.30065	0.38948	16	40	0.8334	0.83295
YDL143W	-40	18	0.23511	0.32426	10	41	0.81984	0.6483	-16	33	0.50341	0.86015	-3	17	0.683	0.71085	6	13	0.62811	0.29801
YDL143W	-23	43	0.46815	0.59988	16	94	0.85858	0.93711	3	17	0.90289	0.64246	-1	9	0.71855	0.58646	7	13	0.65528	0.29801
YDL145C	-47	23	0.16201	0.38772	-3	6	0.66383	0.16429	-11	-9	0.65819	0.14315	-7	-5	0.60326	0.33517	-15	19	0.0862	0.44062
YDL145C	-27	21	0.41422	0.36247	-20	18	0.33536	0.32754	-11	5	0.65819	0.39012	-22	-23	0.28155	0.0925	-25	6	0.01963	0.16499
YDL149W	15	43	0.82788	0.59988	-1	68	0.69314	0.85191	-22	13	0.31878	0.56371	-31	60	0.14359	0.95132	-9	24	0.19079	0.55811
YDL149W	4	51	0.75857	0.66873	-5	35	0.63014	0.57323	-23	24	0.29348	0.76179	13	17	0.88931	0.71085	13	32	0.78625	0.71865
YDL152W	-32	38	0.34411	0.55261	-33	35	0.12669	0.57323	-22	18	0.31878	0.66115	-8	-20	0.58405	0.11839	-14	5	0.09796	0.14912
YDL152W	-13	71	0.5969	0.8016	-31	62	0.1483	0.82087	-31	-15	0.1338	0.08639	-34	-5	0.10723	0.33517	-13	7	0.11224	0.18291
YDL153C	-10	42	0.63293	0.58875	3	75	0.74879	0.87928	-2	56	0.84921	0.95794	20	117	0.93314	0.98055	-8	5	0.2174	0.14912
YDL153C	59	139	0.91944	0.96488	-10	30	0.53977	0.50862	-8	34	0.73729	0.86927	0	92	0.73443	0.97319	-4	27	0.32701	0.62537
YDL155W	-15	66	0.57292	0.77292	-31	7	0.1483	0.17613	-33	-7	0.1069	0.16981	-34	6	0.10723	0.53549	1	15	0.48401	0.3422
YDL155W	-6	65	0.67527	0.76718	-29	17	0.17475	0.31352	-28	8	0.1852	0.45965	-4	2	0.6677	0.46404	-3	20	0.35795	0.46688
YDL156W	-26	26	0.42845	0.42558	-5	19	0.63014	0.34053	-9	-8	0.71153	0.15614	8	-3	0.84501	0.37245	0	23	0.45375	0.53562
YDL156W	-17	21	0.54652	0.36247	0	41	0.70935	0.6483	-31	12	0.1338	0.54125	-14	21	0.45575	0.76182	-10	10	0.17001	0.23544
YDL158C	-16	56	0.5596	0.70808	-15	4	0.43573	0.13968	-24	-10	0.26817	0.13289	-21	-23	0.30065	0.0925	-2	33	0.39175	0.73361
YDL158C	-26	73	0.42845	0.81055	-45	22	0.04541	0.38698	-36	-9	0.07658	0.14315	-12	22	0.50017	0.77413	-6	32	0.26775	0.71865
YDL160C	-47	-9	0.16201	0.03947	-3	29	0.66383	0.49494	4	-1	0.91201	0.26339	-37	-36	0.07973	0.02542	-12	10	0.12765	0.23544
YDL160C	-51	11	0.13333	0.23442	-24	4	0.26109	0.13968	-20	-8	0.37679	0.15614	-8	-32	0.58405	0.03935	-3	25	0.35795	0.58346
YDL162C	-35	-1	0.29925	0.09959	-30	29	0.16153	0.49494	-35	-2	0.08513	0.24549	25	24	0.9481	0.79726	0	5	0.45375	0.14912
YDL162C	-33	3	0.33	0.14331	-25	22	0.24005	0.38698	-14	-7	0.5661	0.16981	-29	10	0.17167	0.60142	-2	15	0.39175	0.3422
YDL163W	-31	11	0.35903	0.23442	-25	46	0.24005	0.69544	-22	9	0.31878	0.47754	-43	-20	0.03981	0.11839	6	37	0.62811	0.79812
YDL163W	-22	22	0.4825	0.37555	-15	8	0.43573	0.18808	-10	1	0.68429	0.30396	-6	10	0.62581	0.60142	11	20	0.74743	0.46688
YDL165W	-50	37	0.13952	0.54297	-37	23	0.09048	0.40388	-15	2	0.53624	0.32562	-14	-42	0.45575	0.01254	-3	23	0.35795	0.53562
YDL165W	-27	57	0.41422	0.716	-41	28	0.06426	0.48103	-43	-9	0.03054	0.14315	-13	-29	0.47831	0.05315	7	49	0.65528	0.91208
YDL166C	30	115	0.87366	0.93998	-34	15	0.11738	0.28466	-19	20	0.40722	0.69591	13	19	0.88931	0.73858	-14	6	0.09796	0.16499
YDL166C	27	107	0.86586	0.92771	3	49	0.74879	0.72579	-14	22	0.5661	0.72965	6	10	0.8228	0.60142	-3	7	0.35795	0.18291
YDL168W	17	90	0.83786	0.88146	-13	61	0.47516	0.81558	6	22	0.92523	0.72965	-36	15	0.08767	0.68012	-6	5	0.26775	0.14912
YDL168W	5	85	0.765	0.86494	-19	49	0.35709	0.72579	-2	23	0.84921	0.74675	-18	-22	0.3652	0.1009	-10	2	0.17001	0.10812
YDL169C	-18	18	0.5331	0.32426	21	76	0.881	0.88457	-17	0	0.47059	0.28447	12	32	0.88137	0.86181	11	26	0.74743	0.60687
YDL169C	-35	-9	0.29925	0.03947	-9	51	0.5607	0.74384	-31	12	0.1338	0.54125	-30	-1	0.15671	0.40789	3	-4	0.54224	0.05263
YDL171C	-10	0	0.63293	0.10923	-8	36	0.57852	0.58553	-15	2	0.53624	0.32562	-9	-32	0.5623	0.03935	11	37	0.74743	0.79812
YDL171C	-19	9	0.52117	0.21113	-9	11	0.5607	0.22545	-7	2	0.76065	0.32562	-15	62	0.43217	0.95397	4	35	0.57033	0.76729
YDL172C	-23	25	0.46815	0.41296	-2	15	0.67808	0.28466	-14	-1	0.5661	0.26339	-20	-12	0.32067	0.21988	-2	26	0.39175	0.60687
YDL172C	-8	54	0.65393	0.69213	-11	10	0.51954	0.21338	-25	-1	0.24515	0.26339	-35	-3	0.09676	0.37245	12	36	0.76729	0.78237
YDL173W	29	111	0.87022	0.93436	18	77	0.8679	0.88813	-22	18	0.31878	0.66115	-18	9	0.3652	0.58646	-8	23	0.2174	0.53562
YDL173W	48	138	0.90648	0.96442	-11	51	0.51954	0.74384	-10	23	0.68429	0.74675	-21	28	0.30065	0.8327	-6	13	0.26775	0.29801
YDL174C	-17	73	0.54652	0.81055	-7	29	0.59611	0.49494	-17	23	0.47059	0.74675	-28	-8	0.18616	0.28374	-18	8	0.05549	0.19981
YDL174C	-11	60	0.62145	0.73585	-16	13	0.41515	0.255	-18	5	0.43879	0.39012	-32	1	0.13128	0.44379	-6	8	0.26775	0.19981
YDL175C	31	122	0.87584	0.94962	-14	41	0.45504	0.6483	-24	7	0.26817	0.4372	-21	-8	0.30065	0.28374	-18	9	0.05549	0.21705
YDL175C	29	90	0.87022	0.88146	-9	34	0.5607	0.56173	-19	8	0.40722	0.45965	-22	-13	0.28155	0.20642	3	23	0.54224	0.53562
YDL176W	3	92	0.74985	0.88743	-7	83	0.59611	0.90779	-13	6	0.59995	0.416	-43	-11	0.03981	0.23392	12	27	0.76729	0.62537
YDL176W	24	96	0.85702	0.9004	6	88	0.7827	0.92239	-22	3	0.31878	0.34488	-31	-14	0.14359	0.19295	3	37	0.54224	0.79812
YDL177C	159	73	0.95123	0.81055	36	16	0.92182	0.29972	9	50	0.94118	0.94597	-15	2	0.43217	0.46404	21	27	0.89198	0.62537
YDL177C	141	65	0.9487	0.76718	10	35	0.81984	0.57323	2	27	0.89218	0.80009	3	21	0.78414	0.76182	13	38	0.78625	0.80965
YDL178W	23	122	0.85381	0.94962	-23	32	0.27891	0.53541	-30	11	0.15272	0.5188	-7	-9	0.60326	0.26659	5	20	0.60059	0.46688
YDL178W	34	88	0.8833	0.87527	-41	13	0.06426	0.255	-31	6	0.1338	0.416	-18	7	0.3652	0.55091	10	28	0.72539	0.64501
YDL179W	-5	84	0.6841	0.86219	-15	-4	0.43573	0.07346	-33	6	0.1069	0.416	-26	-55	0.21401	0.00264	-3	30	0.35795	0.6852
YDL179W	-7	55	0.66494	0.69982	-27	27	0.20406	0.46481	-25	17	0.24515	0.64246	-7	-18	0.60326	0.14129	13	29	0.78625	0.66693
YDL181W	-23	5	0.46815	0.16442	4	1	0.76178	0.1122	3	32	0.90289	0.85343	-35	18	0.09676	0.72477	-9	18	0.19079	0.41584
YDL181W	-22	5	0.4825	0.16442	0	12	0.70935	0.24085	-6	36	0.78185	0.88226	-6	0	0.62581	0.42722	13	9	0.78625	0.21705
YDL182W	-42	-1	0.21308	0.09959	10	54	0.81984	0.76983	-5	0	0.80282	0.28447	-12	29	0.50017	0.84029	0	16	0.45375	0.368
YDL182W	-25	14	0.44211	0.27366	-7	34	0.59611	0.56173	-19	19	0.40722	0.67836	2	39	0.76734	0.89978	2	20	0.51427	0.46688
YDL183C	-22	-5	0.4825	0.06804	-13	20	0.47516	0.35559	-8	9	0.73729	0.47754	-2	31	0.70014	0.85594	2	12	0.51427	0.27574
YDL183C	-56	-16	0.10338	0.01514	-12	8	0.49701	0.18808	-22	-8	0.31878	0.15614	-123	-42	0.00057	0.01254	-32	10	0.00844	0.23544
YDL186W	-17	-3	0.54652	0.08353	15	-2	0.85341	0.08714	3	26	0.90289	0.78926	-13	18	0.47831	0.72477	-17	0	0.06474	0.08495
YDL186W	-11	33	0.62145	0.50327	4	27	0.76178	0.46481	-4	31	0.81912	0.84271	-12	3	0.50017	0.48256	2	20	0.51427	0.46688
YDL187C	-39	37	0.24555	0.54297	-17	14	0.39526	0.26983	-33	-3	0.1069	0.23022	-21	-4	0.30065	0.35254	-9	15	0.19079	0.3422
YDL187C	-43	25	0.20218	0.41296	-18	8	0.37744	0.18808	-18	14	0.43879	0.58297	-38	0	0.07191	0.42722	-1	32	0.42543	0.71865
YDL188C	-14	32	0.58531	0.4942	-6	26	0.61335	0.44918	-17	-3	0.47059	0.23022	-8	74	0.58405	0.96479	-11	13	0.14786	0.29801
YDL188C	-17	47	0.54652	0.63614	-4	44	0.64842	0.679	-12	15	0.63095	0.60303	8	22	0.84501	0.77413	-2	5	0.39175	0.14912
YDL191W	-40	28	0.23511	0.44899	-12	79	0.49701	0.89583	-16	39	0.50341	0.90027	-1	-11	0.71855	0.23392	-5	14	0.29824	0.32187
YDL191W	-36	13	0.28537	0.26047	-25	52	0.24005	0.75293	-11	-9	0.65819	0.14315	-48	-10	0.02289	0.2491	-1	23	0.42543	0.53562
YDL192W	5	30	0.765	0.47114	-7	12	0.59611	0.24085	-6	22	0.78185	0.72965	6	29	0.8228	0.84029	5	50	0.60059	0.91813
YDL192W	-1	25	0.72105	0.41296	-14	15	0.45504	0.28466	-14	25	0.5661	0.77672	-13	16	0.47831	0.69681	-3	33	0.35795	0.73361
YDL194W	-17	51	0.54652	0.66873	-23	-23	0.27891	0.00965	-5	65	0.80282	0.96842	-24	-47	0.24657	0.00724	1	21	0.48401	0.48812
YDL194W	-31	25	0.35903	0.41296	-30	6	0.16153	0.16429	-11	-2	0.65819	0.24549	-27	-1	0.19951	0.40789	2	14	0.51427	0.32187
YDL196W	-39	6	0.24555	0.17636	28	105	0.90181	0.9532	-7	-1	0.76065	0.26339	-20	-26	0.32067	0.06869	-7	6	0.24195	0.16499
YDL196W	-9	21	0.6436	0.36247	-25	25	0.24005	0.43504	-27	1	0.20344	0.30396	-16	-13	0.40835	0.20642	-21	-8	0.03688	0.03322
YDL197C	-10	7	0.63293	0.18829	-20	-29	0.33536	0.00494	-24	18	0.26817	0.66115	-5	-15	0.64549	0.17869	-1	34	0.42543	0.75176
YDL197C	-3	19	0.70361	0.33803	-5	-18	0.63014	0.01667	-7	12	0.76065	0.54125	-10	17	0.54286	0.71085	3	27	0.54224	0.62537
YDL198C	-11	27	0.62145	0.4366	-16	36	0.41515	0.58553	-18	9	0.43879	0.47754	-8	-13	0.58405	0.20642	-9	-2	0.19079	0.06736
YDL198C	-5	8	0.6841	0.19988	-4	31	0.64842	0.52379	-10	33	0.68429	0.86015	18	-27	0.92336	0.06316	-25	11	0.01963	0.2569
YDL201W	n	n	n	n	n	n	n	n	n	n	n	n	65	6	0.98308	0.53549	-3	22	0.35795	0.51301
YDL201W	n	n	n	n	n	n	n	n	n	n	n	n	57	1	0.98089	0.44379	7	-6	0.65528	0.04213
YDL202W	-29	23	0.38726	0.38772	-49	28	0.03081	0.48103	-25	12	0.24515	0.54125	20	19	0.93314	0.73858	15	34	0.81947	0.75176
YDL202W	-40	24	0.23511	0.40137	-10	30	0.53977	0.50862	-7	28	0.76065	0.81399	-28	-16	0.18616	0.16741	2	28	0.51427	0.64501
YDL203C	-24	26	0.45496	0.42558	7	100	0.79294	0.94665	-12	16	0.63095	0.62502	6	29	0.8228	0.84029	-1	-9	0.42543	0.02911
YDL203C	-30	6	0.37314	0.17636	10	67	0.81984	0.8464	-4	11	0.81912	0.5188	-11	15	0.52376	0.68012	3	4	0.54224	0.13553
YDL204W	-4	-1	0.6942	0.09959	105	-1	0.96206	0.09484	-22	16	0.31878	0.62502	-7	-11	0.60326	0.23392	15	39	0.81947	0.82153
YDL204W	-36	4	0.28537	0.15364	53	37	0.94033	0.59933	-18	34	0.43879	0.86927	-2	-3	0.70014	0.37245	6	33	0.62811	0.73361
YDL205C	-49	8	0.14733	0.19988	0	12	0.70935	0.24085	-36	20	0.07658	0.69591	-12	10	0.50017	0.60142	-30	-9	0.01096	0.02911
YDL205C	-28	18	0.4008	0.32426	-28	44	0.18889	0.679	-20	22	0.37679	0.72965	12	1	0.88137	0.44379	-18	3	0.05549	0.1208
YDL207W	-42	8	0.21308	0.19988	11	57	0.82674	0.78972	-21	15	0.34864	0.60303	-29	9	0.17167	0.58646	-6	6	0.26775	0.16499
YDL207W	-27	2	0.41422	0.13115	3	79	0.74879	0.89583	-10	3	0.68429	0.34488	-34	8	0.10723	0.56943	-7	11	0.24195	0.2569
YDL208W	-14	40	0.58531	0.56947	-25	47	0.24005	0.70452	-23	41	0.29348	0.90984	-10	39	0.54286	0.89978	-9	31	0.19079	0.70221
YDL208W	-9	46	0.6436	0.62685	-12	59	0.49701	0.80363	0	24	0.87166	0.76179	-30	12	0.15671	0.63099	-3	14	0.35795	0.32187
YDL209C	-39	-6	0.24555	0.05874	6	78	0.7827	0.89215	-12	-1	0.63095	0.26339	-14	-27	0.45575	0.06316	-1	-8	0.42543	0.03322
YDL209C	-26	-13	0.42845	0.0218	-7	93	0.59611	0.934	-8	12	0.73729	0.54125	-14	2	0.45575	0.46404	-1	5	0.42543	0.14912
YDL210W	-8	17	0.65393	0.30866	-13	-3	0.47516	0.08093	-24	7	0.26817	0.4372	-13	18	0.47831	0.72477	-4	11	0.32701	0.2569
YDL210W	5	47	0.765	0.63614	144	252	0.96654	0.9939	-17	33	0.47059	0.86015	-13	-5	0.47831	0.33517	-3	19	0.35795	0.44062
YDL211C	-20	80	0.50877	0.84704	-21	9	0.31708	0.20085	-13	8	0.59995	0.45965	3	1	0.78414	0.44379	18	36	0.86138	0.78237
YDL211C	-13	98	0.5969	0.90567	21	88	0.881	0.92239	-40	16	0.04672	0.62502	-44	11	0.0352	0.61592	-3	33	0.35795	0.73361
YDL212W	-20	6	0.50877	0.17636	7	176	0.79294	0.98815	-9	-9	0.71153	0.14315	12	17	0.88137	0.71085	10	11	0.72539	0.2569
YDL212W	-40	6	0.23511	0.17636	16	84	0.85858	0.91043	-6	9	0.78185	0.47754	-6	17	0.62581	0.71085	-5	36	0.29824	0.78237
YDL216C	-48	5	0.15421	0.16442	3	67	0.74879	0.8464	-28	12	0.1852	0.54125	-5	-33	0.64549	0.03543	1	-7	0.48401	0.03767
YDL216C	-46	7	0.17223	0.18829	-30	36	0.16153	0.58553	-27	9	0.20344	0.47754	-24	-10	0.24657	0.2491	-12	-9	0.12765	0.02911
YDL217C	-27	19	0.41422	0.33803	-4	24	0.64842	0.42044	-24	8	0.26817	0.45965	-50	-9	0.01725	0.26659	-25	-24	0.01963	0.00411
YDL217C	-5	71	0.6841	0.8016	-14	35	0.45504	0.57323	-19	1	0.40722	0.30396	-21	6	0.30065	0.53549	-5	-16	0.29824	0.01176
YDL218W	5	-7	0.765	0.05197	8	-4	0.80351	0.07346	3	-7	0.90289	0.16981	-24	17	0.24657	0.71085	-17	3	0.06474	0.1208
YDL218W	3	0	0.74985	0.10923	-10	-9	0.53977	0.04414	2	-11	0.89218	0.12149	-23	34	0.26326	0.87504	2	5	0.51427	0.14912
YDL219W	-27	36	0.41422	0.5331	0	41	0.70935	0.6483	-29	13	0.16822	0.56371	-14	-19	0.45575	0.12748	9	0	0.70404	0.08495
YDL219W	-19	35	0.52117	0.52208	5	48	0.77316	0.71545	-44	2	0.02712	0.32562	-32	13	0.13128	0.65044	-9	0	0.19079	0.08495
YDL220C	-5	1376	0.6841	0.99495	69	499	0.9509	0.99597	29	335	0.97367	0.99612	1757	23957	0.99528	0.99896	1324	13787	0.99588	0.99908
YDL220C	4	457	0.75857	0.99059	54	443	0.94113	0.99563	7	292	0.93104	0.99578	2442	31366	0.99643	0.9993	1181	12292	0.99554	0.99897
YDL223C	-21	88	0.49512	0.87527	28	94	0.90181	0.93711	-25	10	0.24515	0.49794	5	19	0.81003	0.73858	12	61	0.76729	0.95798
YDL223C	-6	122	0.67527	0.94962	-27	11	0.20406	0.22545	-27	26	0.20344	0.78926	-12	-15	0.50017	0.17869	7	54	0.65528	0.93697
YDL224C	-41	3	0.22352	0.14331	-20	52	0.33536	0.75293	-36	4	0.07658	0.36893	-4	-2	0.6677	0.38948	-16	-8	0.07456	0.03322
YDL224C	-32	-8	0.34411	0.0452	15	64	0.85341	0.83157	-40	-14	0.04672	0.09402	5	-24	0.81003	0.0841	-8	5	0.2174	0.14912
YDL225W	-2	44	0.71244	0.6078	34	50	0.91687	0.73419	-14	17	0.5661	0.64246	28	90	0.95489	0.97215	5	29	0.60059	0.66693
YDL225W	39	41	0.89317	0.5798	55	58	0.94194	0.79673	-7	13	0.76065	0.56371	-20	49	0.32067	0.92969	-7	5	0.24195	0.14912
YDL228C	-38	-2	0.25943	0.09213	-5	82	0.63014	0.9048	-40	12	0.04672	0.54125	-31	-2	0.14359	0.38948	-19	4	0.04909	0.13553
YDL228C	-35	0	0.29925	0.10923	-1	81	0.69314	0.90193	-33	-13	0.1069	0.10109	-2	-5	0.70014	0.33517	-9	-18	0.19079	0.0089
YDL230W	79	39	0.93218	0.56087	37	25	0.92354	0.43504	10	27	0.94586	0.80009	0	14	0.73443	0.66586	-15	5	0.0862	0.14912
YDL230W	58	20	0.91784	0.34893	4	27	0.76178	0.46481	-2	25	0.84921	0.77672	-15	41	0.43217	0.90829	7	1	0.65528	0.09648
YDL231C	-5	40	0.6841	0.56947	-28	42	0.18889	0.65957	-20	3	0.37679	0.34488	-8	-7	0.58405	0.2995	-9	1	0.19079	0.09648
YDL231C	-9	37	0.6436	0.54297	-27	23	0.20406	0.40388	-26	-1	0.22361	0.26339	-15	-38	0.43217	0.02048	1	4	0.48401	0.13553
YDL233W	-32	44	0.34411	0.6078	-23	34	0.27891	0.56173	-2	10	0.84921	0.49794	-40	-19	0.0558	0.12748	5	15	0.60059	0.3422
YDL233W	-30	43	0.37314	0.59988	-27	5	0.20406	0.15118	-18	10	0.43879	0.49794	-23	-10	0.26326	0.2491	-1	31	0.42543	0.70221
YDL235C	14	44	0.82226	0.6078	-13	36	0.47516	0.58553	4	62	0.91201	0.96626	-29	0	0.17167	0.42722	-6	18	0.26775	0.41584
YDL235C	-8	30	0.65393	0.47114	-3	33	0.66383	0.54828	-15	20	0.53624	0.69591	-15	1	0.43217	0.44379	-16	-1	0.07456	0.07387
YDL236W	-14	18	0.58531	0.32426	3	46	0.74879	0.69544	-18	32	0.43879	0.85343	21	30	0.93683	0.84915	-1	14	0.42543	0.32187
YDL236W	-26	7	0.42845	0.18829	-19	23	0.35709	0.40388	-29	45	0.16822	0.9291	-8	25	0.58405	0.8075	-2	6	0.39175	0.16499
YDL238C	-148	5	0.0016	0.16442	-29	24	0.17475	0.42044	-37	-16	0.06861	0.07829	-19	-24	0.34115	0.0841	-17	-2	0.06474	0.06736
YDL238C	-167	-10	0.00057	0.03465	-1	21	0.69314	0.371	-34	-23	0.09528	0.03521	-28	-33	0.18616	0.03543	-20	-8	0.04179	0.03322
YDL241W	-3	50	0.70361	0.66069	-4	37	0.64842	0.59933	-5	5	0.80282	0.39012	-50	19	0.01725	0.73858	1	4	0.48401	0.13553
YDL241W	-9	19	0.6436	0.33803	13	136	0.84088	0.97781	-6	16	0.78185	0.62502	-3	7	0.683	0.55091	-8	13	0.2174	0.29801
YDL243C	-19	27	0.52117	0.4366	-15	25	0.43573	0.43504	-15	35	0.53624	0.87565	0	-4	0.73443	0.35254	3	5	0.54224	0.14912
YDL243C	2	59	0.74274	0.72782	-5	32	0.63014	0.53541	-16	39	0.50341	0.90027	-31	26	0.14359	0.81774	-9	19	0.19079	0.44062
YDL244W	-17	23	0.54652	0.38772	-11	29	0.51954	0.49494	3	33	0.90289	0.86015	-21	17	0.30065	0.71085	4	18	0.57033	0.41584
YDL244W	-3	48	0.70361	0.64566	-24	40	0.26109	0.63612	-6	17	0.78185	0.64246	9	-15	0.8549	0.17869	-17	5	0.06474	0.14912
YDL248W	3	21	0.74985	0.36247	-32	9	0.136	0.20085	-28	-13	0.1852	0.10109	-8	34	0.58405	0.87504	7	13	0.65528	0.29801
YDL248W	-6	30	0.67527	0.47114	-9	63	0.5607	0.82593	-26	-29	0.22361	0.01766	21	24	0.93683	0.79726	6	27	0.62811	0.62537
YDR001C	-52	22	0.12644	0.37555	-20	13	0.33536	0.255	-5	-1	0.80282	0.26339	-24	-19	0.24657	0.12748	-9	10	0.19079	0.23544
YDR001C	-25	55	0.44211	0.69982	-20	11	0.33536	0.22545	-14	17	0.5661	0.64246	-46	-9	0.02715	0.26659	4	3	0.57033	0.1208
YDR002W	-32	56	0.34411	0.70808	-25	33	0.24005	0.54828	-24	36	0.26817	0.88226	4	16	0.79772	0.69681	5	25	0.60059	0.58346
YDR002W	-14	58	0.58531	0.72128	4	69	0.76178	0.8572	-15	28	0.53624	0.81399	11	40	0.87343	0.90369	9	21	0.70404	0.48812
YDR003W	-35	7	0.29925	0.18829	-39	-6	0.0753	0.0607	-15	10	0.53624	0.49794	-3	-9	0.683	0.26659	25	41	0.9203	0.84391
YDR003W	-19	14	0.52117	0.27366	-39	-12	0.0753	0.03196	-19	3	0.40722	0.34488	18	2	0.92336	0.46404	22	49	0.89849	0.91208
YDR007W	-23	39	0.46815	0.56087	8	42	0.80351	0.65957	-31	-1	0.1338	0.26339	-15	-1	0.43217	0.40789	6	32	0.62811	0.71865
YDR007W	-13	50	0.5969	0.66069	-24	28	0.26109	0.48103	-22	31	0.31878	0.84271	-29	-28	0.17167	0.05787	7	33	0.65528	0.73361
YDR008C	-22	26	0.4825	0.42558	-19	33	0.35709	0.54828	1	44	0.88203	0.92432	n	n	n	n	-12	20	0.12765	0.46688
YDR008C	-13	37	0.5969	0.54297	-1	32	0.69314	0.53541	-23	24	0.29348	0.76179	n	n	n	n	-10	20	0.17001	0.46688
YDR018C	-19	24	0.52117	0.40137	-31	44	0.1483	0.679	-23	22	0.29348	0.72965	n	n	n	n	41	39	0.96894	0.82153
YDR018C	-46	10	0.17223	0.2226	-30	40	0.16153	0.63612	-8	20	0.73729	0.69591	36	89	0.96835	0.97169	59	43	0.98207	0.86526
YDR019C	-42	-7	0.21308	0.05197	-9	61	0.5607	0.81558	-27	-13	0.20344	0.10109	-10	-10	0.54286	0.2491	-4	15	0.32701	0.3422
YDR019C	-38	-21	0.25943	0.00665	56	54	0.94286	0.76983	-3	-6	0.83462	0.18589	-27	-12	0.19951	0.21988	-5	8	0.29824	0.19981
YDR020C	-48	23	0.15421	0.38772	-45	21	0.04541	0.371	-15	2	0.53624	0.32562	-7	34	0.60326	0.87504	0	19	0.45375	0.44062
YDR020C	-73	11	0.05106	0.23442	-19	15	0.35709	0.28466	-16	-4	0.50341	0.21461	21	-16	0.93683	0.16741	19	11	0.87303	0.2569
YDR021W	11	53	0.80631	0.68514	-7	63	0.59611	0.82593	0	32	0.87166	0.85343	-1	63	0.71855	0.95501	36	39	0.96072	0.82153
YDR021W	30	43	0.87366	0.59988	1	59	0.72441	0.80363	4	31	0.91201	0.84271	35	48	0.96709	0.92739	33	63	0.95272	0.96129
YDR022C	-73	6	0.05106	0.17636	-40	14	0.06932	0.26983	-29	11	0.16822	0.5188	21	-32	0.93683	0.03935	21	42	0.89198	0.85476
YDR022C	-47	36	0.16201	0.5331	-42	-7	0.06058	0.05334	-23	27	0.29348	0.80009	-5	-7	0.64549	0.2995	5	34	0.60059	0.75176
YDR023W	60	152	0.92025	0.97211	30	68	0.90653	0.85191	4	22	0.91201	0.72965	n	n	n	n	11	20	0.74743	0.46688
YDR023W	52	155	0.91233	0.97314	10	82	0.81984	0.9048	-15	75	0.53624	0.97686	n	n	n	n	-1	21	0.42543	0.48812
YDR024W	-32	-2	0.34411	0.09213	-9	-33	0.5607	0.00321	-6	11	0.78185	0.5188	19	53	0.92831	0.9374	41	49	0.96894	0.91208
YDR024W	-16	15	0.5596	0.28605	-31	-1	0.1483	0.09484	-12	10	0.63095	0.49794	42	83	0.97376	0.96962	10	36	0.72539	0.78237
YDR025W	23	119	0.85381	0.94606	-17	52	0.39526	0.75293	-10	20	0.68429	0.69591	-5	16	0.64549	0.69681	-19	-1	0.04909	0.07387
YDR025W	23	117	0.85381	0.94228	-11	52	0.51954	0.75293	-7	18	0.76065	0.66115	-23	40	0.26326	0.90369	-6	18	0.26775	0.41584
YDR026C	57	122	0.91658	0.94962	20	42	0.87617	0.65957	-18	38	0.43879	0.89343	-1	71	0.71855	0.96202	-1	8	0.42543	0.19981
YDR026C	-6	58	0.67527	0.72128	0	42	0.70935	0.65957	23	54	0.96888	0.9552	13	139	0.88931	0.98354	-17	10	0.06474	0.23544
YDR029W	12	97	0.81273	0.90304	-14	47	0.45504	0.70452	-19	7	0.40722	0.4372	-6	1	0.62581	0.44379	18	13	0.86138	0.29801
YDR029W	-9	61	0.6436	0.74216	-41	31	0.06426	0.52379	-20	7	0.37679	0.4372	7	-25	0.83396	0.07513	1	7	0.48401	0.18291
YDR031W	27	112	0.86586	0.9362	52	99	0.93929	0.9455	-10	33	0.68429	0.86015	59	146	0.98147	0.98412	-3	24	0.35795	0.55811
YDR031W	-12	75	0.60917	0.82099	-9	69	0.5607	0.8572	-11	43	0.65819	0.92056	24	92	0.945	0.97319	3	36	0.54224	0.78237
YDR032C	-23	57	0.46815	0.716	2	46	0.73925	0.69544	-17	8	0.47059	0.45965	-15	-23	0.43217	0.0925	-5	12	0.29824	0.27574
YDR032C	-17	63	0.54652	0.75547	10	68	0.81984	0.85191	-9	38	0.71153	0.89343	-13	-20	0.47831	0.11839	-7	8	0.24195	0.19981
YDR034C	9	84	0.79414	0.86219	-7	35	0.59611	0.57323	-11	-4	0.65819	0.21461	-25	-1	0.22989	0.40789	1	22	0.48401	0.51301
YDR034C	-2	67	0.71244	0.779	93	152	0.95953	0.98378	-16	7	0.50341	0.4372	-7	-4	0.60326	0.35254	16	22	0.8334	0.51301
YDR034C-A	7	23	0.78164	0.38772	-1	60	0.69314	0.80961	-10	50	0.68429	0.94597	18	37	0.92336	0.89034	-2	6	0.39175	0.16499
YDR034C-A	-1	11	0.72105	0.23442	4	-11	0.76178	0.03541	-23	11	0.29348	0.5188	-7	4	0.60326	0.50132	-16	19	0.07456	0.44062
YDR034W-B	1	20	0.73482	0.34893	-12	24	0.49701	0.42044	1	7	0.88203	0.4372	14	23	0.89828	0.78771	-17	13	0.06474	0.29801
YDR034W-B	3	29	0.74985	0.46058	-1	30	0.69314	0.50862	15	15	0.95828	0.60303	3	51	0.78414	0.93395	-11	16	0.14786	0.368
YDR035W	-33	27	0.33	0.4366	5	70	0.77316	0.86088	-14	40	0.5661	0.9046	-25	18	0.22989	0.72477	-7	3	0.24195	0.1208
YDR035W	-17	52	0.54652	0.67733	-12	41	0.49701	0.6483	0	37	0.87166	0.88716	-17	15	0.38626	0.68012	5	12	0.60059	0.27574
YDR037W	3	31	0.74985	0.48215	17	37	0.86261	0.59933	0	43	0.87166	0.92056	24	21	0.945	0.76182	6	18	0.62811	0.41584
YDR037W	-16	20	0.5596	0.34893	-12	9	0.49701	0.20085	-4	32	0.81912	0.85343	22	20	0.94016	0.74962	-2	36	0.39175	0.78237
YDR038C	-126	4	0.00699	0.15364	-10	27	0.53977	0.46481	-29	-24	0.16822	0.03202	-10	-7	0.54286	0.2995	-27	14	0.01575	0.32187
YDR038C	-119	9	0.01032	0.21113	-27	28	0.20406	0.48103	-44	-29	0.02712	0.01766	-29	-10	0.17167	0.2491	-5	31	0.29824	0.70221
YDR040C	-2	70	0.71244	0.79483	-28	-6	0.18889	0.0607	-33	3	0.1069	0.34488	-31	10	0.14359	0.60142	-10	16	0.17001	0.368
YDR040C	-46	41	0.17223	0.5798	-27	-16	0.20406	0.02046	-19	-8	0.40722	0.15614	-22	-19	0.28155	0.12748	-6	3	0.26775	0.1208
YDR041W	-18	37	0.5331	0.54297	-14	56	0.45504	0.78351	-10	28	0.68429	0.81399	14	8	0.89828	0.56943	5	17	0.60059	0.39301
YDR041W	-8	22	0.65393	0.37555	-9	61	0.5607	0.81558	-4	17	0.81912	0.64246	28	-10	0.95489	0.2491	15	19	0.81947	0.44062
YDR042C	3	23	0.74985	0.38772	-31	-9	0.1483	0.04414	-19	10	0.40722	0.49794	-163	-150	0.00034	0.00011	-1	19	0.42543	0.44062
YDR042C	-8	13	0.65393	0.26047	-13	11	0.47516	0.22545	-9	22	0.71153	0.72965	2	3	0.76734	0.48256	-9	19	0.19079	0.44062
YDR043C	-37	12	0.27148	0.24658	-6	38	0.61335	0.61243	-8	12	0.73729	0.54125	-9	15	0.5623	0.68012	17	13	0.84813	0.29801
YDR043C	-8	31	0.65393	0.48215	-31	44	0.1483	0.679	-9	16	0.71153	0.62502	15	-1	0.90657	0.40789	12	27	0.76729	0.62537
YDR044W	1	109	0.73482	0.93184	-1	33	0.69314	0.54828	-1	46	0.86152	0.93332	-27	45	0.19951	0.92164	58	6	0.98161	0.16499
YDR044W	12	99	0.81273	0.90935	6	51	0.7827	0.74384	-7	58	0.76065	0.96079	-61	43	0.00529	0.91612	14	12	0.80269	0.27574
YDR045C	-21	16	0.49512	0.2981	-26	31	0.22372	0.52379	-8	10	0.73729	0.49794	-8	-24	0.58405	0.0841	-5	0	0.29824	0.08495
YDR045C	-20	17	0.50877	0.30866	-19	38	0.35709	0.61243	6	18	0.92523	0.66115	-18	45	0.3652	0.92164	-5	13	0.29824	0.29801
YDR047W	-3	38	0.70361	0.55261	3	104	0.74879	0.95182	13	29	0.95361	0.82288	-13	39	0.47831	0.89978	-11	16	0.14786	0.368
YDR047W	65	271	0.92484	0.9876	-20	45	0.33536	0.68705	2	28	0.89218	0.81399	71	45	0.98423	0.92164	-45	27	0.00319	0.62537
YDR048C	-33	6	0.33	0.17636	-4	30	0.64842	0.50862	-15	-1	0.53624	0.26339	24	33	0.945	0.86848	-4	23	0.32701	0.53562
YDR048C	-45	6	0.18255	0.17636	-13	39	0.47516	0.62451	-21	9	0.34864	0.47754	-9	8	0.5623	0.56943	3	13	0.54224	0.29801
YDR050C	-29	11	0.38726	0.23442	-3	77	0.66383	0.88813	-8	17	0.73729	0.64246	-12	12	0.50017	0.63099	5	3	0.60059	0.1208
YDR050C	-23	22	0.46815	0.37555	-19	74	0.35709	0.87594	13	36	0.95361	0.88226	1	4	0.75135	0.50132	-18	-4	0.05549	0.05263
YDR051C	13266	81	0.99449	0.85094	10040	44	0.9962	0.679	8877	58	0.99737	0.96079	37386	879	1	0.99378	10010	91	0.9992	0.98401
YDR051C	17513	98	0.99495	0.90567	13728	57	0.99701	0.78972	9392	29	0.99749	0.82288	34921	782	0.99988	0.99344	11352	116	0.99954	0.98846
YDR053W	-30	-8	0.37314	0.0452	14	83	0.84663	0.90779	-17	13	0.47059	0.56371	23	-10	0.94281	0.2491	2	22	0.51427	0.51301
YDR053W	-37	23	0.27148	0.38772	-19	57	0.35709	0.78972	-20	23	0.37679	0.74675	19	6	0.92831	0.53549	11	11	0.74743	0.2569
YDR054C	-49	-24	0.14733	0.00436	-24	7	0.26109	0.17613	-15	1	0.53624	0.30396	-24	-7	0.24657	0.2995	5	28	0.60059	0.64501
YDR054C	-52	-12	0.12644	0.02581	-13	13	0.47516	0.255	-25	-3	0.24515	0.23022	-43	6	0.03981	0.53549	-6	31	0.26775	0.70221
YDR055W	-70	9	0.05691	0.21113	-18	8	0.37744	0.18808	-18	-1	0.43879	0.26339	-31	0	0.14359	0.42722	-5	8	0.29824	0.19981
YDR055W	-38	43	0.25943	0.59988	-13	3	0.47516	0.12979	-8	-13	0.73729	0.10109	-29	-4	0.17167	0.35254	-8	17	0.2174	0.39301
YDR056C	-17	23	0.54652	0.38772	-2	86	0.67808	0.91641	-19	32	0.40722	0.85343	-55	27	0.01024	0.82533	-11	2	0.14786	0.10812
YDR056C	-17	30	0.54652	0.47114	-7	82	0.59611	0.9048	-12	13	0.63095	0.56371	16	28	0.9137	0.8327	-9	-25	0.19079	0.00353
YDR058C	3	45	0.74985	0.61767	-34	26	0.11738	0.44918	-23	-26	0.29348	0.02666	-8	9	0.58405	0.58646	5	19	0.60059	0.44062
YDR058C	-14	30	0.58531	0.47114	-26	-7	0.22372	0.05334	-34	-7	0.09528	0.16981	-18	-25	0.3652	0.07513	-8	16	0.2174	0.368
YDR059C	9	27	0.79414	0.4366	55	133	0.94194	0.97643	1	20	0.88203	0.69591	24	37	0.945	0.89034	-11	0	0.14786	0.08495
YDR059C	2	31	0.74274	0.48215	39	86	0.9271	0.91641	-17	21	0.47059	0.71176	-7	16	0.60326	0.69681	-3	17	0.35795	0.39301
YDR061W	-37	21	0.27148	0.36247	-7	68	0.59611	0.85191	-31	8	0.1338	0.45965	-21	40	0.30065	0.90369	-8	-10	0.2174	0.02591
YDR061W	-32	-1	0.34411	0.09959	-21	50	0.31708	0.73419	-41	18	0.04103	0.66115	2	22	0.76734	0.77413	-15	-20	0.0862	0.0073
YDR062W	-101	20	0.02019	0.34893	-16	15	0.41515	0.28466	-42	-14	0.03544	0.09402	-20	-16	0.32067	0.16741	5	13	0.60059	0.29801
YDR062W	-119	43	0.01032	0.59988	-16	18	0.41515	0.32754	-25	-10	0.24515	0.13289	-40	-11	0.0558	0.23392	-24	1	0.02363	0.09648
YDR064W	-25	37	0.44211	0.54297	-11	44	0.51954	0.679	-21	25	0.34864	0.77672	4	3	0.79772	0.48256	-1	-1	0.42543	0.07387
YDR064W	-15	39	0.57292	0.56087	-27	28	0.20406	0.48103	-24	23	0.26817	0.74675	11	-15	0.87343	0.17869	-6	-9	0.26775	0.02911
YDR065W	-35	5	0.29925	0.16442	-17	57	0.39526	0.78972	-34	-6	0.09528	0.18589	-24	4	0.24657	0.50132	-8	-10	0.2174	0.02591
YDR065W	-45	-4	0.18255	0.07596	-29	51	0.17475	0.74384	-32	11	0.12149	0.5188	-2	22	0.70014	0.77413	-10	-14	0.17001	0.01438
YDR066C	-22	40	0.4825	0.56947	-31	21	0.1483	0.371	-21	13	0.34864	0.56371	-22	12	0.28155	0.63099	26	41	0.92646	0.84391
YDR066C	-13	41	0.5969	0.5798	-29	22	0.17475	0.38698	-36	5	0.07658	0.39012	-14	0	0.45575	0.42722	29	41	0.93845	0.84391
YDR068W	-31	5	0.35903	0.16442	-16	29	0.41515	0.49494	-13	-2	0.59995	0.24549	-10	13	0.54286	0.65044	15	29	0.81947	0.66693
YDR068W	-38	27	0.25943	0.4366	-1	190	0.69314	0.98999	-24	-44	0.26817	0.00353	1	5	0.75135	0.51846	4	32	0.57033	0.71865
YDR069C	-43	-12	0.20218	0.02581	-20	7	0.33536	0.17613	-27	-10	0.20344	0.13289	-19	-4	0.34115	0.35254	-2	41	0.39175	0.84391
YDR069C	-52	-13	0.12644	0.0218	-15	50	0.43573	0.73419	-25	9	0.24515	0.47754	-62	-15	0.00483	0.17869	-11	25	0.14786	0.58346
YDR070C	-25	73	0.44211	0.81055	0	36	0.70935	0.58553	-14	14	0.5661	0.58297	-11	-1	0.52376	0.40789	8	38	0.68029	0.80965
YDR070C	-14	94	0.58531	0.89489	-49	37	0.03081	0.59933	-36	1	0.07658	0.30396	-19	7	0.34115	0.55091	19	22	0.87303	0.51301
YDR071C	-14	21	0.58531	0.36247	-27	28	0.20406	0.48103	-1	19	0.86152	0.67836	4	-3	0.79772	0.37245	0	32	0.45375	0.71865
YDR071C	-29	40	0.38726	0.56947	-31	21	0.1483	0.371	-31	7	0.1338	0.4372	-13	-12	0.47831	0.21988	18	45	0.86138	0.88513
YDR072C	-47	5	0.16201	0.16442	-33	7	0.12669	0.17613	-16	-25	0.50341	0.02951	-44	1	0.0352	0.44379	6	50	0.62811	0.91813
YDR072C	51	48	0.91072	0.64566	-58	6	0.01437	0.16429	-35	-4	0.08513	0.21461	-1	-23	0.71855	0.0925	-3	26	0.35795	0.60687
YDR073W	-32	70	0.34411	0.79483	-24	9	0.26109	0.20085	-18	4	0.43879	0.36893	15	-9	0.90657	0.26659	1	27	0.48401	0.62537
YDR073W	-35	65	0.29925	0.76718	-21	14	0.31708	0.26983	-32	10	0.12149	0.49794	30	-55	0.95961	0.00264	19	25	0.87303	0.58346
YDR074W	-22	18	0.4825	0.32426	-29	13	0.17475	0.255	-32	-11	0.12149	0.12149	-2	3	0.70014	0.48256	-3	31	0.35795	0.70221
YDR074W	-28	43	0.4008	0.59988	-12	23	0.49701	0.40388	-28	-12	0.1852	0.11032	-19	-31	0.34115	0.04429	27	13	0.93217	0.29801
YDR075W	-34	55	0.31589	0.69982	-24	30	0.26109	0.50862	-36	-11	0.07658	0.12149	3	6	0.78414	0.53549	1	25	0.48401	0.58346
YDR075W	-25	73	0.44211	0.81055	-15	8	0.43573	0.18808	-41	-8	0.04103	0.15614	3	-7	0.78414	0.2995	-4	17	0.32701	0.39301
YDR076W	-37	10	0.27148	0.2226	-32	-1	0.136	0.09484	-24	15	0.26817	0.60303	-4	-13	0.6677	0.20642	7	18	0.65528	0.41584
YDR076W	-48	41	0.15421	0.5798	-38	5	0.08208	0.15118	-12	-4	0.63095	0.21461	-5	-26	0.64549	0.06869	3	33	0.54224	0.73361
YDR077W	-23	90	0.46815	0.88146	-44	13	0.05035	0.255	-28	3	0.1852	0.34488	7	6	0.83396	0.53549	-6	28	0.26775	0.64501
YDR077W	-18	63	0.5331	0.75547	-48	23	0.0338	0.40388	-15	19	0.53624	0.67836	23	26	0.94281	0.81774	2	44	0.51427	0.87588
YDR078C	-24	60	0.45496	0.73585	-19	41	0.35709	0.6483	-11	-5	0.65819	0.2007	-14	12	0.45575	0.63099	5	20	0.60059	0.46688
YDR078C	-30	46	0.37314	0.62685	-25	4	0.24005	0.13968	-39	-8	0.05288	0.15614	3	2	0.78414	0.46404	13	14	0.78625	0.32187
YDR079W	-75	34	0.04761	0.51222	-21	-1	0.31708	0.09484	-25	-4	0.24515	0.21461	-22	-13	0.28155	0.20642	-3	20	0.35795	0.46688
YDR079W	-48	76	0.15421	0.8273	-10	61	0.53977	0.81558	-51	-24	0.01105	0.03202	9	21	0.8549	0.76182	21	48	0.89198	0.905
YDR086C	-79	49	0.04302	0.65289	-16	66	0.41515	0.84214	-14	17	0.5661	0.64246	27	6	0.95259	0.53549	4	34	0.57033	0.75176
YDR086C	-77	79	0.04543	0.84325	-21	26	0.31708	0.44918	-14	-3	0.5661	0.23022	18	-1	0.92336	0.40789	11	39	0.74743	0.82153
YDR087C	-25	45	0.44211	0.61767	-24	50	0.26109	0.73419	-17	17	0.47059	0.64246	-24	-24	0.24657	0.0841	17	34	0.84813	0.75176
YDR087C	-6	77	0.67527	0.83488	-26	27	0.22372	0.46481	-40	-17	0.04672	0.06918	-9	-19	0.5623	0.12748	6	23	0.62811	0.53562
YDR091C	-38	79	0.25943	0.84325	-27	48	0.20406	0.71545	-27	2	0.20344	0.32562	16	-1	0.9137	0.40789	15	36	0.81947	0.78237
YDR091C	-66	93	0.06597	0.89064	-30	48	0.16153	0.71545	-31	20	0.1338	0.69591	0	-18	0.73443	0.14129	-18	23	0.05549	0.53562
YDR092W	-13	66	0.5969	0.77292	-15	22	0.43573	0.38698	-15	1	0.53624	0.30396	-21	-5	0.30065	0.33517	-4	21	0.32701	0.48812
YDR092W	-9	58	0.6436	0.72128	-39	31	0.0753	0.52379	-24	3	0.26817	0.34488	-22	15	0.28155	0.68012	1	43	0.48401	0.86526
YDR094W	-109	56	0.01503	0.70808	-27	51	0.20406	0.74384	-30	27	0.15272	0.80009	4	-22	0.79772	0.1009	-7	26	0.24195	0.60687
YDR094W	-72	107	0.05266	0.92771	-24	37	0.26109	0.59933	-19	12	0.40722	0.54125	14	8	0.89828	0.56943	6	55	0.62811	0.94096
YDR098C	26	102	0.86299	0.91669	-31	21	0.1483	0.371	-22	24	0.31878	0.76179	-18	-22	0.3652	0.1009	7	33	0.65528	0.73361
YDR098C	-26	49	0.42845	0.65289	1	53	0.72441	0.76086	-15	15	0.53624	0.60303	-8	-15	0.58405	0.17869	14	25	0.80269	0.58346
YDR099W	2	69	0.74274	0.78921	-26	32	0.22372	0.53541	-15	-9	0.53624	0.14315	-8	15	0.58405	0.68012	0	53	0.45375	0.93286
YDR099W	-19	47	0.52117	0.63614	-14	33	0.45504	0.54828	-7	-4	0.76065	0.21461	-18	-7	0.3652	0.2995	34	48	0.95569	0.905
YDR100W	-31	59	0.35903	0.72782	-10	28	0.53977	0.48103	-19	22	0.40722	0.72965	11	7	0.87343	0.55091	33	39	0.95272	0.82153
YDR100W	-15	72	0.57292	0.80573	20	88	0.87617	0.92239	-16	41	0.50341	0.90984	12	-6	0.88137	0.31722	5	19	0.60059	0.44062
YDR102C	-10	71	0.63293	0.8016	-1	36	0.69314	0.58553	-19	24	0.40722	0.76179	10	-6	0.8656	0.31722	-1	16	0.42543	0.368
YDR102C	-6	71	0.67527	0.8016	-10	13	0.53977	0.255	-12	23	0.63095	0.74675	-10	-29	0.54286	0.05315	0	16	0.45375	0.368
YDR108W	-6	30	0.67527	0.47114	-68	0	0.0077	0.10312	-30	9	0.15272	0.47754	-13	42	0.47831	0.9122	30	67	0.94176	0.96837
YDR108W	-31	-5	0.35903	0.06804	-32	36	0.136	0.58553	-34	10	0.09528	0.49794	-3	10	0.683	0.60142	43	64	0.97236	0.96346
YDR109C	5	83	0.765	0.85783	-7	66	0.59611	0.84214	26	58	0.97162	0.96079	-28	-4	0.18616	0.35254	-4	20	0.32701	0.46688
YDR109C	7	97	0.78164	0.90304	-11	33	0.51954	0.54828	0	53	0.87166	0.95258	-38	-18	0.07191	0.14129	2	21	0.51427	0.48812
YDR112W	-59	40	0.08915	0.56947	-18	50	0.37744	0.73419	-40	16	0.04672	0.62502	-16	-36	0.40835	0.02542	8	25	0.68029	0.58346
YDR112W	-9	78	0.6436	0.83878	-16	20	0.41515	0.35559	-27	-14	0.20344	0.09402	9	0	0.8549	0.42722	-25	4	0.01963	0.13553
YDR113C	-60	-13	0.08422	0.0218	-11	19	0.51954	0.34053	-18	10	0.43879	0.49794	-4	15	0.6677	0.68012	n	n	n	n
YDR113C	-65	-14	0.06873	0.01973	-11	72	0.51954	0.86962	0	-8	0.87166	0.15614	-19	-5	0.34115	0.33517	n	n	n	n
YDR115W	-14	55	0.58531	0.69982	-8	92	0.57852	0.93182	-9	18	0.71153	0.66115	-16	4	0.40835	0.50132	-5	16	0.29824	0.368
YDR115W	4	77	0.75857	0.83488	-46	-6	0.04127	0.0607	-10	16	0.68429	0.62502	-35	13	0.09676	0.65044	-14	20	0.09796	0.46688
YDR120C	2338	220	0.98519	0.98405	88	70	0.95838	0.86088	1	39	0.88203	0.90027	-7	36	0.60326	0.88654	9	64	0.70404	0.96346
YDR120C	2755	352	0.986	0.98932	96	94	0.96056	0.93711	16	91	0.95976	0.98313	6	51	0.8228	0.93395	-4	35	0.32701	0.76729
YDR123C	-38	10	0.25943	0.2226	-29	29	0.17475	0.49494	-8	26	0.73729	0.78926	-32	49	0.13128	0.92969	23	31	0.90614	0.70221
YDR123C	-47	23	0.16201	0.38772	-26	53	0.22372	0.76086	-14	18	0.5661	0.66115	-33	-9	0.11954	0.26659	20	37	0.88422	0.79812
YDR126W	-100	32	0.02134	0.4942	-13	41	0.47516	0.6483	-38	2	0.06063	0.32562	-14	-1	0.45575	0.40789	-12	11	0.12765	0.2569
YDR126W	-109	15	0.01503	0.28605	6	46	0.7827	0.69544	-33	-9	0.1069	0.14315	-25	34	0.22989	0.87504	-17	6	0.06474	0.16499
YDR131C	-51	6	0.13333	0.17636	-18	19	0.37744	0.34053	-20	15	0.37679	0.60303	-17	-6	0.38626	0.31722	-3	9	0.35795	0.21705
YDR131C	-54	6	0.11405	0.17636	-21	27	0.31708	0.46481	-9	19	0.71153	0.67836	-34	-9	0.10723	0.26659	14	1	0.80269	0.09648
YDR132C	-9	39	0.6436	0.56087	-2	24	0.67808	0.42044	-13	14	0.59995	0.58297	-39	-5	0.06385	0.33517	13	24	0.78625	0.55811
YDR132C	n	n	n	n	n	n	n	n	-14	37	0.5661	0.88716	-2	-14	0.70014	0.19295	1	50	0.48401	0.91813
YDR133C	-92	12	0.02753	0.24658	-16	68	0.41515	0.85191	-37	-3	0.06861	0.23022	-4	-5	0.6677	0.33517	-12	15	0.12765	0.3422
YDR133C	-98	16	0.02329	0.2981	-11	52	0.51954	0.75293	-14	-3	0.5661	0.23022	1	32	0.75135	0.86181	-5	5	0.29824	0.14912
YDR135C	-55	-13	0.10831	0.0218	-6	14	0.61335	0.26983	-33	-7	0.1069	0.16981	-46	9	0.02715	0.58646	7	28	0.65528	0.64501
YDR135C	-56	-10	0.10338	0.03465	-16	18	0.41515	0.32754	-14	-1	0.5661	0.26339	10	16	0.8656	0.69681	-2	33	0.39175	0.73361
YDR139C	-23	44	0.46815	0.6078	-7	61	0.59611	0.81558	6	30	0.92523	0.83485	-40	-25	0.0558	0.07513	-12	5	0.12765	0.14912
YDR139C	-20	43	0.50877	0.59988	-5	47	0.63014	0.70452	10	2	0.94586	0.32562	-9	-7	0.5623	0.2995	-10	7	0.17001	0.18291
YDR140W	-108	12	0.01549	0.24658	8	91	0.80351	0.92975	-21	14	0.34864	0.58297	-25	19	0.22989	0.73858	-20	11	0.04179	0.2569
YDR140W	-67	24	0.06322	0.40137	6	66	0.7827	0.84214	-22	1	0.31878	0.30396	-34	41	0.10723	0.90829	-11	20	0.14786	0.46688
YDR145W	-59	-2	0.08915	0.09213	-11	-8	0.51954	0.04771	-31	3	0.1338	0.34488	-118	-73	0.00069	0.00046	-54	12	0.00194	0.27574
YDR145W	-56	14	0.10338	0.27366	-45	19	0.04541	0.34053	-36	-8	0.07658	0.15614	-68	12	0.00345	0.63099	-26	14	0.01724	0.32187
YDR146C	-47	39	0.16201	0.56087	-14	48	0.45504	0.71545	-19	3	0.40722	0.34488	-29	13	0.17167	0.65044	0	9	0.45375	0.21705
YDR146C	3	62	0.74985	0.74813	-20	26	0.33536	0.44918	-22	17	0.31878	0.64246	11	-16	0.87343	0.16741	-8	22	0.2174	0.51301
YDR147W	-20	36	0.50877	0.5331	-21	28	0.31708	0.48103	-4	16	0.81912	0.62502	-9	-29	0.5623	0.05315	-1	12	0.42543	0.27574
YDR147W	-11	42	0.62145	0.58875	7	34	0.79294	0.56173	-3	11	0.83462	0.5188	-15	0	0.43217	0.42722	-6	8	0.26775	0.19981
YDR148C	-43	6	0.20218	0.17636	2	85	0.73925	0.91354	-16	6	0.50341	0.416	12	4	0.88137	0.50132	-9	7	0.19079	0.18291
YDR148C	-36	2	0.28537	0.13115	12	83	0.83329	0.90779	-10	0	0.68429	0.28447	-12	7	0.50017	0.55091	-1	30	0.42543	0.6852
YDR149C	-32	22	0.34411	0.37555	-7	48	0.59611	0.71545	-9	9	0.71153	0.47754	-17	-6	0.38626	0.31722	-8	22	0.2174	0.51301
YDR149C	-55	22	0.10831	0.37555	3	48	0.74879	0.71545	-5	-9	0.80282	0.14315	-12	5	0.50017	0.51846	5	10	0.60059	0.23544
YDR151C	-64	-5	0.07114	0.06804	16	66	0.85858	0.84214	-18	-12	0.43879	0.11032	-32	1	0.13128	0.44379	-15	14	0.0862	0.32187
YDR151C	-64	-12	0.07114	0.02581	-3	95	0.66383	0.93883	-37	4	0.06861	0.36893	-16	-18	0.40835	0.14129	-14	17	0.09796	0.39301
YDR152W	-23	42	0.46815	0.58875	-18	52	0.37744	0.75293	-13	24	0.59995	0.76179	-5	15	0.64549	0.68012	16	24	0.8334	0.55811
YDR152W	-42	41	0.21308	0.5798	-11	35	0.51954	0.57323	-11	30	0.65819	0.83485	-31	-48	0.14359	0.00655	-14	19	0.09796	0.44062
YDR153C	38	117	0.89122	0.94228	85	157	0.95734	0.98482	44	129	0.97982	0.9894	5	-6	0.81003	0.31722	22	23	0.89849	0.53562
YDR153C	32	121	0.8786	0.94847	29	93	0.90411	0.934	38	105	0.97777	0.98655	-35	22	0.09676	0.77413	27	21	0.93217	0.48812
YDR154C	-75	12	0.04761	0.24658	16	106	0.85858	0.95504	-13	15	0.59995	0.60303	-21	8	0.30065	0.56943	-4	10	0.32701	0.23544
YDR154C	-69	7	0.05932	0.18829	19	90	0.87226	0.92756	-33	2	0.1069	0.32562	-29	-3	0.17167	0.37245	-6	10	0.26775	0.23544
YDR155C	-42	12	0.21308	0.24658	-14	38	0.45504	0.61243	-30	-10	0.15272	0.13289	4	2	0.79772	0.46404	-2	41	0.39175	0.84391
YDR155C	-42	2	0.21308	0.13115	-17	31	0.39526	0.52379	-20	-5	0.37679	0.2007	-51	-5	0.01576	0.33517	2	20	0.51427	0.46688
YDR156W	-25	17	0.44211	0.30866	-9	42	0.5607	0.65957	-14	15	0.5661	0.60303	-17	-6	0.38626	0.31722	-2	13	0.39175	0.29801
YDR156W	-21	19	0.49512	0.33803	14	29	0.84663	0.49494	-25	20	0.24515	0.69591	-64	34	0.00437	0.87504	-8	21	0.2174	0.48812
YDR158W	-44	-1	0.19196	0.09959	-23	2	0.27891	0.12002	-12	-1	0.63095	0.26339	-24	-20	0.24657	0.11839	-19	10	0.04909	0.23544
YDR158W	-75	-11	0.04761	0.02925	-23	6	0.27891	0.16429	-5	-3	0.80282	0.23022	-59	-1	0.00724	0.40789	2	3	0.51427	0.1208
YDR162C	-46	10	0.17223	0.2226	-41	17	0.06426	0.31352	-23	-7	0.29348	0.16981	10	-9	0.8656	0.26659	-20	-7	0.04179	0.03767
YDR162C	-45	13	0.18255	0.26047	-20	24	0.33536	0.42044	-27	7	0.20344	0.4372	-29	55	0.17167	0.94223	-14	9	0.09796	0.21705
YDR165W	-123	-7	0.00872	0.05197	1	47	0.72441	0.70452	-37	-6	0.06861	0.18589	-9	5	0.5623	0.51846	11	56	0.74743	0.94427
YDR165W	-120	-20	0.00986	0.00803	-17	40	0.39526	0.63612	-22	-18	0.31878	0.06143	12	22	0.88137	0.77413	-8	30	0.2174	0.6852
YDR167W	-111	-19	0.01434	0.00952	-5	18	0.63014	0.32754	-24	1	0.26817	0.30396	-14	-2	0.45575	0.38948	9	33	0.70404	0.73361
YDR167W	-127	-6	0.00665	0.05874	-20	19	0.33536	0.34053	-34	-11	0.09528	0.12149	-2	-17	0.70014	0.15406	9	23	0.70404	0.53562
YDR168W	9	76	0.79414	0.8273	21	45	0.881	0.68705	-12	17	0.63095	0.64246	-42	-25	0.0436	0.07513	27	29	0.93217	0.66693
YDR168W	24	119	0.85702	0.94606	-1	27	0.69314	0.46481	3	32	0.90289	0.85343	-15	-15	0.43217	0.17869	17	41	0.84813	0.84391
YDR169C	-72	8	0.05266	0.19988	-39	2	0.0753	0.12002	-8	46	0.73729	0.93332	37	28	0.96927	0.8327	-10	0	0.17001	0.08495
YDR169C	-10	53	0.63293	0.68514	-13	27	0.47516	0.46481	6	25	0.92523	0.77672	30	36	0.95961	0.88654	-19	5	0.04909	0.14912
YDR170W-A	15	27	0.82788	0.4366	-2	-1	0.67808	0.09484	-23	-4	0.29348	0.21461	-9	1	0.5623	0.44379	-17	-9	0.06474	0.02911
YDR170W-A	28	40	0.86815	0.56947	-11	13	0.51954	0.255	-22	17	0.31878	0.64246	-2	-1	0.70014	0.40789	-21	-12	0.03688	0.01906
YDR173C	-107	8	0.01594	0.19988	-16	17	0.41515	0.31352	-27	-7	0.20344	0.16981	-23	29	0.26326	0.84029	7	33	0.65528	0.73361
YDR173C	-133	-19	0.00401	0.00952	-13	15	0.47516	0.28466	-27	-34	0.20344	0.01014	-27	-22	0.19951	0.1009	-33	-21	0.00776	0.00616
YDR176W	-44	0	0.19196	0.10923	-25	33	0.24005	0.54828	-13	11	0.59995	0.5188	-10	-11	0.54286	0.23392	-7	1	0.24195	0.09648
YDR176W	-44	0	0.19196	0.10923	-24	27	0.26109	0.46481	-30	-13	0.15272	0.10109	2	-15	0.76734	0.17869	-5	9	0.29824	0.21705
YDR179C	-51	35	0.13333	0.52208	-43	13	0.05495	0.255	-18	8	0.43879	0.45965	35	168	0.96709	0.98561	-10	39	0.17001	0.82153
YDR179C	-30	29	0.37314	0.46058	-27	-11	0.20406	0.03541	-19	-10	0.40722	0.13289	19	10	0.92831	0.60142	12	47	0.76729	0.89883
YDR181C	-27	2	0.41422	0.13115	-10	3	0.53977	0.12979	-19	25	0.40722	0.77672	-23	17	0.26326	0.71085	7	27	0.65528	0.62537
YDR181C	-39	1	0.24555	0.12002	-42	4	0.06058	0.13968	-35	8	0.08513	0.45965	7	17	0.83396	0.71085	46	46	0.97488	0.89129
YDR182W	-23	8	0.46815	0.19988	-38	5	0.08208	0.15118	-19	16	0.40722	0.62502	-3	10	0.683	0.60142	-6	1	0.26775	0.09648
YDR182W	-44	18	0.19196	0.32426	-34	61	0.11738	0.81558	-17	-8	0.47059	0.15614	0	-6	0.73443	0.31722	-21	-6	0.03688	0.04213
YDR183W	-48	12	0.15421	0.24658	-18	75	0.37744	0.87928	-15	40	0.53624	0.9046	-35	-14	0.09676	0.19295	-24	4	0.02363	0.13553
YDR183W	-50	21	0.13952	0.36247	-10	28	0.53977	0.48103	-24	-26	0.26817	0.02666	-27	27	0.19951	0.82533	-11	23	0.14786	0.53562
YDR184C	-46	3	0.17223	0.14331	-10	20	0.53977	0.35559	-21	7	0.34864	0.4372	-2	-20	0.70014	0.11839	-21	-1	0.03688	0.07387
YDR184C	-25	40	0.44211	0.56947	-44	41	0.05035	0.6483	-30	5	0.15272	0.39012	-11	26	0.52376	0.81774	-15	2	0.0862	0.10812
YDR185C	-38	73	0.25943	0.81055	-34	5	0.11738	0.15118	-25	7	0.24515	0.4372	-26	-27	0.21401	0.06316	-12	-4	0.12765	0.05263
YDR185C	-23	34	0.46815	0.51222	-1	2	0.69314	0.12002	-25	-3	0.24515	0.23022	4	20	0.79772	0.74962	-5	-4	0.29824	0.05263
YDR187C	-53	8	0.12002	0.19988	-15	29	0.43573	0.49494	-18	4	0.43879	0.36893	-19	9	0.34115	0.58646	23	4	0.90614	0.13553
YDR187C	-47	5	0.16201	0.16442	-24	19	0.26109	0.34053	5	24	0.91907	0.76179	-34	-12	0.10723	0.21988	2	-5	0.51427	0.04761
YDR188W	43	27	0.89879	0.4366	-16	56	0.41515	0.78351	-7	24	0.76065	0.76179	-19	9	0.34115	0.58646	-9	-1	0.19079	0.07387
YDR188W	14	13	0.82226	0.26047	-10	77	0.53977	0.88813	-12	15	0.63095	0.60303	-12	-11	0.50017	0.23392	n	n	n	n
YDR189W	2	49	0.74274	0.65289	-10	44	0.53977	0.679	-7	9	0.76065	0.47754	-28	33	0.18616	0.86848	4	14	0.57033	0.32187
YDR189W	17	82	0.83786	0.85415	-2	13	0.67808	0.255	-14	30	0.5661	0.83485	-4	16	0.6677	0.69681	-1	15	0.42543	0.3422
YDR191W	-97	46	0.02398	0.62685	-39	32	0.0753	0.53541	-46	-45	0.02154	0.00296	-4	0	0.6677	0.42722	5	40	0.60059	0.83295
YDR191W	-99	35	0.02214	0.52208	-40	-6	0.06932	0.0607	-33	6	0.1069	0.416	-24	-24	0.24657	0.0841	-4	24	0.32701	0.55811
YDR192C	-34	19	0.31589	0.33803	-42	9	0.06058	0.20085	-19	-6	0.40722	0.18589	-11	-13	0.52376	0.20642	21	45	0.89198	0.88513
YDR192C	-55	-2	0.10831	0.09213	-21	26	0.31708	0.44918	-24	1	0.26817	0.30396	-11	25	0.52376	0.8075	-1	42	0.42543	0.85476
YDR194C	21	28	0.84922	0.44899	34	57	0.91687	0.78972	-5	-2	0.80282	0.24549	23	100	0.94281	0.97733	12	17	0.76729	0.39301
YDR194C	-13	-8	0.5969	0.0452	-10	-6	0.53977	0.0607	-24	3	0.26817	0.34488	65	94	0.98308	0.97399	41	65	0.96894	0.96563
YDR195W	-48	-23	0.15421	0.00516	-22	26	0.29799	0.44918	-42	14	0.03544	0.58297	-40	34	0.0558	0.87504	9	16	0.70404	0.368
YDR195W	-38	3	0.25943	0.14331	3	62	0.74879	0.82087	-23	24	0.29348	0.76179	15	9	0.90657	0.58646	16	28	0.8334	0.64501
YDR196C	-33	56	0.33	0.70808	-17	15	0.39526	0.28466	-31	19	0.1338	0.67836	14	55	0.89828	0.94223	32	18	0.94998	0.41584
YDR196C	-24	54	0.45496	0.69213	-34	6	0.11738	0.16429	-37	5	0.06861	0.39012	-19	-15	0.34115	0.17869	8	38	0.68029	0.80965
YDR197W	-24	23	0.45496	0.38772	-14	21	0.45504	0.371	-23	19	0.29348	0.67836	-1	11	0.71855	0.61592	6	32	0.62811	0.71865
YDR197W	-33	20	0.33	0.34893	-35	3	0.106	0.12979	-18	20	0.43879	0.69591	-31	1	0.14359	0.44379	8	35	0.68029	0.76729
YDR198C	-58	5	0.09443	0.16442	7	-10	0.79294	0.03839	-21	-12	0.34864	0.11032	-20	34	0.32067	0.87504	n	n	n	n
YDR198C	-62	-12	0.07768	0.02581	-7	31	0.59611	0.52379	-22	0	0.31878	0.28447	-23	24	0.26326	0.79726	n	n	n	n
YDR200C	-39	-3	0.24555	0.08353	-4	64	0.64842	0.83157	-48	-13	0.01709	0.10109	-14	-6	0.45575	0.31722	-13	-13	0.11224	0.01587
YDR200C	-35	3	0.29925	0.14331	0	39	0.70935	0.62451	-38	12	0.06063	0.54125	-41	-10	0.04982	0.2491	-3	66	0.35795	0.96722
YDR202C	-16	19	0.5596	0.33803	-19	3	0.35709	0.12979	-3	5	0.83462	0.39012	-39	4	0.06385	0.50132	18	43	0.86138	0.86526
YDR202C	-34	26	0.31589	0.42558	-7	25	0.59611	0.43504	-3	11	0.83462	0.5188	-29	19	0.17167	0.73858	4	31	0.57033	0.70221
YDR203W	-28	24	0.4008	0.40137	-41	29	0.06426	0.49494	-9	-7	0.71153	0.16981	-20	25	0.32067	0.8075	6	16	0.62811	0.368
YDR203W	-40	18	0.23511	0.32426	-11	27	0.51954	0.46481	-24	1	0.26817	0.30396	-24	20	0.24657	0.74962	1	24	0.48401	0.55811
YDR204W	-75	31	0.04761	0.48215	-43	-8	0.05495	0.04771	-40	-33	0.04672	0.01116	8	-33	0.84501	0.03543	9	31	0.70404	0.70221
YDR204W	-86	21	0.0343	0.36247	-47	8	0.03747	0.18808	-57	-45	0.00649	0.00296	-9	-15	0.5623	0.17869	12	37	0.76729	0.79812
YDR207C	-22	42	0.4825	0.58875	-29	19	0.17475	0.34053	-22	-23	0.31878	0.03521	-30	12	0.15671	0.63099	15	17	0.81947	0.39301
YDR207C	-32	30	0.34411	0.47114	-9	24	0.5607	0.42044	-16	-18	0.50341	0.06143	-21	15	0.30065	0.68012	14	-2	0.80269	0.06736
YDR208W	-54	2	0.11405	0.13115	-30	20	0.16153	0.35559	-11	-7	0.65819	0.16981	-10	-39	0.54286	0.01875	-4	-6	0.32701	0.04213
YDR208W	-57	-2	0.09913	0.09213	-17	39	0.39526	0.62451	-18	0	0.43879	0.28447	8	5	0.84501	0.51846	-40	-15	0.00445	0.01278
YDR212W	-28	23	0.4008	0.38772	-32	0	0.136	0.10312	-32	-5	0.12149	0.2007	20	9	0.93314	0.58646	12	26	0.76729	0.60687
YDR212W	-26	-1	0.42845	0.09959	-38	-12	0.08208	0.03196	-28	0	0.1852	0.28447	20	-32	0.93314	0.03935	61	47	0.9831	0.89883
YDR214W	-9	59	0.6436	0.72782	-19	21	0.35709	0.371	-13	21	0.59995	0.71176	7	-11	0.83396	0.23392	-15	-12	0.0862	0.01906
YDR214W	-28	31	0.4008	0.48215	-6	23	0.61335	0.40388	-10	27	0.68429	0.80009	-5	-1	0.64549	0.40789	-8	-7	0.2174	0.03767
YDR224C	-43	40	0.20218	0.56947	-25	17	0.24005	0.31352	-9	7	0.71153	0.4372	-28	7	0.18616	0.55091	6	37	0.62811	0.79812
YDR224C	-50	10	0.13952	0.2226	-25	3	0.24005	0.12979	-8	49	0.73729	0.94346	-6	-27	0.62581	0.06316	12	38	0.76729	0.80965
YDR225W	-12	71	0.60917	0.8016	-36	11	0.09795	0.22545	-35	-12	0.08513	0.11032	-20	-32	0.32067	0.03935	6	23	0.62811	0.53562
YDR225W	-26	45	0.42845	0.61767	-24	12	0.26109	0.24085	-42	3	0.03544	0.34488	-5	6	0.64549	0.53549	-9	23	0.19079	0.53562
YDR228C	-28	46	0.4008	0.62685	-44	4	0.05035	0.13968	-45	-10	0.02382	0.13289	40	3	0.97261	0.48256	-13	33	0.11224	0.73361
YDR228C	-30	42	0.37314	0.58875	-42	-7	0.06058	0.05334	-37	-11	0.06861	0.12149	21	21	0.93683	0.76182	-11	46	0.14786	0.89129
YDR229W	-33	23	0.33	0.38772	-34	-11	0.11738	0.03541	-30	-34	0.15272	0.01014	5	-2	0.81003	0.38948	-7	9	0.24195	0.21705
YDR229W	-35	17	0.29925	0.30866	-35	7	0.106	0.17613	-33	-2	0.1069	0.24549	38	26	0.97054	0.81774	-18	13	0.05549	0.29801
YDR230W	-77	38	0.04543	0.55261	-16	25	0.41515	0.43504	-24	-4	0.26817	0.21461	0	10	0.73443	0.60142	32	42	0.94998	0.85476
YDR230W	-30	112	0.37314	0.9362	-44	1	0.05035	0.1122	-35	7	0.08513	0.4372	13	-2	0.88931	0.38948	29	40	0.93845	0.83295
YDR231C	36	80	0.88743	0.84704	-14	36	0.45504	0.58553	-45	39	0.02382	0.90027	-38	-21	0.07191	0.11011	-5	39	0.29824	0.82153
YDR231C	68	101	0.92633	0.9144	-12	17	0.49701	0.31352	-39	8	0.05288	0.45965	-17	-32	0.38626	0.03935	-2	24	0.39175	0.55811
YDR232W	-10	46	0.63293	0.62685	-33	33	0.12669	0.54828	-5	11	0.80282	0.5188	-25	-6	0.22989	0.31722	17	28	0.84813	0.64501
YDR232W	-43	27	0.20218	0.4366	-20	22	0.33536	0.38698	-10	14	0.68429	0.58297	15	14	0.90657	0.66586	6	32	0.62811	0.71865
YDR235W	-27	59	0.41422	0.72782	7	18	0.79294	0.32754	-6	-3	0.78185	0.23022	-50	12	0.01725	0.63099	8	27	0.68029	0.62537
YDR235W	-36	24	0.28537	0.40137	-14	27	0.45504	0.46481	-21	25	0.34864	0.77672	-14	-7	0.45575	0.2995	7	17	0.65528	0.39301
YDR237W	-33	46	0.33	0.62685	-41	22	0.06426	0.38698	-40	14	0.04672	0.58297	-13	-4	0.47831	0.35254	10	23	0.72539	0.53562
YDR237W	-20	91	0.50877	0.88399	-23	24	0.27891	0.42044	-46	0	0.02154	0.28447	6	-2	0.8228	0.38948	10	28	0.72539	0.64501
YDR239C	-41	24	0.22352	0.40137	-36	-8	0.09795	0.04771	-24	14	0.26817	0.58297	27	3	0.95259	0.48256	6	34	0.62811	0.75176
YDR239C	-55	15	0.10831	0.28605	-46	-19	0.04127	0.01517	-19	35	0.40722	0.87565	11	2	0.87343	0.46404	-7	33	0.24195	0.73361
YDR244W	-24	11	0.45496	0.23442	-55	1	0.01805	0.1122	-33	26	0.1069	0.78926	6	-10	0.8228	0.2491	20	40	0.88422	0.83295
YDR244W	-28	13	0.4008	0.26047	-47	6	0.03747	0.16429	-16	74	0.50341	0.97606	20	18	0.93314	0.72477	37	43	0.96266	0.86526
YDR247W	-22	27	0.4825	0.4366	-17	22	0.39526	0.38698	-25	5	0.24515	0.39012	-24	23	0.24657	0.78771	8	14	0.68029	0.32187
YDR247W	3	88	0.74985	0.87527	-24	1	0.26109	0.1122	-8	15	0.73729	0.60303	-21	-19	0.30065	0.12748	-4	21	0.32701	0.48812
YDR249C	-18	11	0.5331	0.23442	35	20	0.91986	0.35559	-30	6	0.15272	0.416	11	-3	0.87343	0.37245	19	28	0.87303	0.64501
YDR249C	-34	-10	0.31589	0.03465	29	5	0.90411	0.15118	-21	-9	0.34864	0.14315	-5	-26	0.64549	0.06869	-2	13	0.39175	0.29801
YDR250C	-91	-2	0.0288	0.09213	-10	6	0.53977	0.16429	-7	13	0.76065	0.56371	-11	27	0.52376	0.82533	-26	-2	0.01724	0.06736
YDR250C	-100	-10	0.02134	0.03465	-2	24	0.67808	0.42044	-28	-10	0.1852	0.13289	-28	-23	0.18616	0.0925	-4	17	0.32701	0.39301
YDR251W	25	53	0.8592	0.68514	6	-2	0.7827	0.08714	-17	11	0.47059	0.5188	-31	-48	0.14359	0.00655	4	24	0.57033	0.55811
YDR251W	43	55	0.89879	0.69982	8	11	0.80351	0.22545	-33	5	0.1069	0.39012	-32	-14	0.13128	0.19295	-3	35	0.35795	0.76729
YDR253C	-27	42	0.41422	0.58875	-33	26	0.12669	0.44918	-33	-2	0.1069	0.24549	-39	-30	0.06385	0.0489	-3	32	0.35795	0.71865
YDR253C	-20	37	0.50877	0.54297	-17	27	0.39526	0.46481	-25	5	0.24515	0.39012	7	-22	0.83396	0.1009	-1	18	0.42543	0.41584
YDR256C	-3	55	0.70361	0.69982	-18	58	0.37744	0.79673	-19	35	0.40722	0.87565	-19	-3	0.34115	0.37245	11	17	0.74743	0.39301
YDR256C	-12	65	0.60917	0.76718	-23	51	0.27891	0.74384	-20	26	0.37679	0.78926	-14	3	0.45575	0.48256	3	29	0.54224	0.66693
YDR257C	-11	85	0.62145	0.86494	-23	48	0.27891	0.71545	-39	32	0.05288	0.85343	-12	7	0.50017	0.55091	-1	20	0.42543	0.46688
YDR257C	-15	80	0.57292	0.84704	-18	84	0.37744	0.91043	-19	18	0.40722	0.66115	-3	-8	0.683	0.28374	0	44	0.45375	0.87588
YDR259C	25	130	0.8592	0.95742	-25	74	0.24005	0.87594	-17	47	0.47059	0.93708	-2	-16	0.70014	0.16741	-15	21	0.0862	0.48812
YDR259C	11	75	0.80631	0.82099	-25	89	0.24005	0.92527	-8	25	0.73729	0.77672	2	-9	0.76734	0.26659	21	32	0.89198	0.71865
YDR262W	-51	50	0.13333	0.66069	-69	4	0.00712	0.13968	-24	40	0.26817	0.9046	-40	24	0.0558	0.79726	-3	35	0.35795	0.76729
YDR262W	-15	81	0.57292	0.85094	-36	27	0.09795	0.46481	-27	16	0.20344	0.62502	-16	-27	0.40835	0.06316	3	39	0.54224	0.82153
YDR263C	-46	6	0.17223	0.17636	-49	5	0.03081	0.15118	-19	22	0.40722	0.72965	-21	-18	0.30065	0.14129	28	23	0.93514	0.53562
YDR263C	-57	8	0.09913	0.19988	-13	19	0.47516	0.34053	-22	-14	0.31878	0.09402	13	22	0.88931	0.77413	18	34	0.86138	0.75176
YDR264C	-106	-18	0.01721	0.01101	-6	23	0.61335	0.40388	-29	-30	0.16822	0.01595	-37	7	0.07973	0.55091	-19	2	0.04909	0.10812
YDR264C	-118	2	0.01113	0.13115	-3	47	0.66383	0.70452	-33	-33	0.1069	0.01116	-29	-13	0.17167	0.20642	-25	-10	0.01963	0.02591
YDR265W	-18	18	0.5331	0.32426	-2	17	0.67808	0.31352	2	11	0.89218	0.5188	51	29	0.97882	0.84029	-22	3	0.03082	0.1208
YDR265W	-10	15	0.63293	0.28605	-43	5	0.05495	0.15118	-12	-8	0.63095	0.15614	14	3	0.89828	0.48256	-1	0	0.42543	0.08495
YDR266C	-51	21	0.13333	0.36247	-19	-1	0.35709	0.09484	-16	7	0.50341	0.4372	18	22	0.92336	0.77413	3	32	0.54224	0.71865
YDR266C	-33	17	0.33	0.30866	-31	4	0.1483	0.13968	-16	1	0.50341	0.30396	-12	17	0.50017	0.71085	10	29	0.72539	0.66693
YDR267C	-19	4	0.52117	0.15364	-3	11	0.66383	0.22545	2	-10	0.89218	0.13289	-17	3	0.38626	0.48256	-2	38	0.39175	0.80965
YDR267C	6	-10	0.77349	0.03465	-10	-8	0.53977	0.04771	3	-1	0.90289	0.26339	-23	-11	0.26326	0.23392	-4	26	0.32701	0.60687
YDR268W	-4	19	0.6942	0.33803	-12	24	0.49701	0.42044	-21	-13	0.34864	0.10109	-7	-7	0.60326	0.2995	12	39	0.76729	0.82153
YDR268W	-13	18	0.5969	0.32426	-21	-32	0.31708	0.00344	-22	1	0.31878	0.30396	-37	-22	0.07973	0.1009	15	42	0.81947	0.85476
YDR270W	-20	-2	0.50877	0.09213	-20	-6	0.33536	0.0607	-18	-5	0.43879	0.2007	1	-10	0.75135	0.2491	6	7	0.62811	0.18291
YDR270W	-69	-5	0.05932	0.06804	-8	17	0.57852	0.31352	-4	5	0.81912	0.39012	-12	-10	0.50017	0.2491	9	0	0.70404	0.08495
YDR271C	-7	81	0.66494	0.85094	-2	86	0.67808	0.91641	6	24	0.92523	0.76179	0	-17	0.73443	0.15406	-1	39	0.42543	0.82153
YDR271C	-23	48	0.46815	0.64566	-23	55	0.27891	0.77696	-9	6	0.71153	0.416	-7	-28	0.60326	0.05787	13	41	0.78625	0.84391
YDR273W	8	95	0.78852	0.89764	15	72	0.85341	0.86962	-36	0	0.07658	0.28447	-15	2	0.43217	0.46404	-11	26	0.14786	0.60687
YDR273W	-4	64	0.6942	0.76179	-19	46	0.35709	0.69544	-51	-27	0.01105	0.02416	15	-15	0.90657	0.17869	11	24	0.74743	0.55811
YDR274C	-36	4	0.28537	0.15364	-38	1	0.08208	0.1122	-21	1	0.34864	0.30396	-19	-12	0.34115	0.21988	0	33	0.45375	0.73361
YDR274C	-46	4	0.17223	0.15364	-36	-6	0.09795	0.0607	-8	3	0.73729	0.34488	-9	-12	0.5623	0.21988	0	34	0.45375	0.75176
YDR275W	-10	11	0.63293	0.23442	-4	7	0.64842	0.17613	-4	2	0.81912	0.32562	-15	79	0.43217	0.96755	-3	41	0.35795	0.84391
YDR275W	8	-3	0.78852	0.08353	4	-6	0.76178	0.0607	14	9	0.95589	0.47754	-6	131	0.62581	0.98285	12	43	0.76729	0.86526
YDR276C	-62	34	0.07768	0.51222	-1	37	0.69314	0.59933	-18	-2	0.43879	0.24549	-39	14	0.06385	0.66586	-21	11	0.03688	0.2569
YDR276C	-46	18	0.17223	0.32426	-1	35	0.69314	0.57323	-19	0	0.40722	0.28447	-24	-10	0.24657	0.2491	-12	-10	0.12765	0.02591
YDR279W	-66	25	0.06597	0.41296	-10	42	0.53977	0.65957	-34	1	0.09528	0.30396	-40	-23	0.0558	0.0925	-7	-10	0.24195	0.02591
YDR279W	-87	24	0.03293	0.40137	-4	47	0.64842	0.70452	-32	-8	0.12149	0.15614	-54	-2	0.01116	0.38948	18	33	0.86138	0.73361
YDR280W	3	101	0.74985	0.9144	-21	33	0.31708	0.54828	1	19	0.88203	0.67836	-40	-2	0.0558	0.38948	-3	17	0.35795	0.39301
YDR280W	42	120	0.8973	0.94767	-22	91	0.29799	0.92975	-10	22	0.68429	0.72965	19	-16	0.92831	0.16741	-1	20	0.42543	0.46688
YDR281C	-33	61	0.33	0.74216	-19	24	0.35709	0.42044	-34	-2	0.09528	0.24549	-30	-24	0.15671	0.0841	-7	18	0.24195	0.41584
YDR281C	-17	76	0.54652	0.8273	-17	36	0.39526	0.58553	-25	34	0.24515	0.86927	-23	-4	0.26326	0.35254	2	14	0.51427	0.32187
YDR282C	-65	-8	0.06873	0.0452	-16	23	0.41515	0.40388	-4	3	0.81912	0.34488	-32	-14	0.13128	0.19295	-15	-11	0.0862	0.02249
YDR282C	-55	-15	0.10831	0.01721	-22	10	0.29799	0.21338	-16	3	0.50341	0.34488	-35	28	0.09676	0.8327	-3	-3	0.35795	0.05948
YDR285W	-107	3	0.01594	0.14331	-20	43	0.33536	0.67038	-23	-27	0.29348	0.02416	-29	-4	0.17167	0.35254	-22	-16	0.03082	0.01176
YDR285W	-72	1	0.05266	0.12002	8	54	0.80351	0.76983	-28	-9	0.1852	0.14315	-32	2	0.13128	0.46404	-18	8	0.05549	0.19981
YDR286C	-82	24	0.03843	0.40137	-43	-46	0.05495	0.0008	7	50	0.93104	0.94597	-13	-1	0.47831	0.40789	1	21	0.48401	0.48812
YDR286C	-98	31	0.02329	0.48215	14	1747	0.84663	0.99816	-51	-29	0.01105	0.01766	-7	-3	0.60326	0.37245	0	24	0.45375	0.55811
YDR290W	-11	7	0.62145	0.18829	-6	39	0.61335	0.62451	-17	4	0.47059	0.36893	-19	19	0.34115	0.73858	9	16	0.70404	0.368
YDR290W	13	64	0.81721	0.76179	20	63	0.87617	0.82593	-10	22	0.68429	0.72965	-21	-20	0.30065	0.11839	2	24	0.51427	0.55811
YDR292C	1	88	0.73482	0.87527	-14	51	0.45504	0.74384	-4	38	0.81912	0.89343	-27	-16	0.19951	0.16741	-5	24	0.29824	0.55811
YDR292C	35	121	0.88525	0.94847	15	96	0.85341	0.94044	-6	31	0.78185	0.84271	-24	-11	0.24657	0.23392	7	25	0.65528	0.58346
YDR293C	-85	18	0.0358	0.32426	14	75	0.84663	0.87928	-15	24	0.53624	0.76179	-22	7	0.28155	0.55091	-6	11	0.26775	0.2569
YDR293C	-72	7	0.05266	0.18829	4	57	0.76178	0.78972	-29	-19	0.16822	0.05561	10	-16	0.8656	0.16741	-7	11	0.24195	0.2569
YDR294C	-6	23	0.67527	0.38772	-26	-6	0.22372	0.0607	-27	-16	0.20344	0.07829	-17	37	0.38626	0.89034	8	15	0.68029	0.3422
YDR294C	-16	2	0.5596	0.13115	-16	10	0.41515	0.21338	-25	24	0.24515	0.76179	-17	22	0.38626	0.77413	3	32	0.54224	0.71865
YDR295C	-2	93	0.71244	0.89064	-1	65	0.69314	0.83708	-31	4	0.1338	0.36893	16	-15	0.9137	0.17869	-5	7	0.29824	0.18291
YDR295C	-24	97	0.45496	0.90304	-1	37	0.69314	0.59933	-22	-26	0.31878	0.02666	-22	-13	0.28155	0.20642	-6	0	0.26775	0.08495
YDR297W	73	42	0.92954	0.58875	-4	41	0.64842	0.6483	-26	23	0.22361	0.74675	-17	2	0.38626	0.46404	6	18	0.62811	0.41584
YDR297W	50	45	0.90854	0.61767	4	-4	0.76178	0.07346	-16	14	0.50341	0.58297	-43	-14	0.03981	0.19295	-14	9	0.09796	0.21705
YDR299W	15	95	0.82788	0.89764	-36	-6	0.09795	0.0607	-2	6	0.84921	0.416	-30	22	0.15671	0.77413	-12	16	0.12765	0.368
YDR299W	-13	56	0.5969	0.70808	-12	17	0.49701	0.31352	-15	7	0.53624	0.4372	-28	-9	0.18616	0.26659	-10	10	0.17001	0.23544
YDR303C	-65	-11	0.06873	0.02925	0	41	0.70935	0.6483	-23	-22	0.29348	0.03989	-22	-36	0.28155	0.02542	9	13	0.70404	0.29801
YDR303C	-40	-12	0.23511	0.02581	-11	57	0.51954	0.78972	-15	-24	0.53624	0.03202	-45	-1	0.03164	0.40789	5	13	0.60059	0.29801
YDR304C	-27	51	0.41422	0.66873	-18	21	0.37744	0.371	-2	-1	0.84921	0.26339	-4	-25	0.6677	0.07513	0	12	0.45375	0.27574
YDR304C	-20	59	0.50877	0.72782	-26	27	0.22372	0.46481	-12	8	0.63095	0.45965	-5	-14	0.64549	0.19295	10	13	0.72539	0.29801
YDR307W	-31	16	0.35903	0.2981	-17	-10	0.39526	0.03839	-27	-20	0.20344	0.05071	-17	-6	0.38626	0.31722	4	1	0.57033	0.09648
YDR307W	-20	14	0.50877	0.27366	-31	23	0.1483	0.40388	-24	-5	0.26817	0.2007	-13	-4	0.47831	0.35254	-4	28	0.32701	0.64501
YDR308C	-41	31	0.22352	0.48215	35	140	0.91986	0.9793	-24	3	0.26817	0.34488	-15	5	0.43217	0.51846	-11	20	0.14786	0.46688
YDR308C	-43	47	0.20218	0.63614	-11	15	0.51954	0.28466	-30	11	0.15272	0.5188	-23	12	0.26326	0.63099	0	33	0.45375	0.73361
YDR309C	-10	33	0.63293	0.50327	-17	14	0.39526	0.26983	-13	-13	0.59995	0.10109	-21	17	0.30065	0.71085	3	30	0.54224	0.6852
YDR309C	-47	29	0.16201	0.46058	-30	8	0.16153	0.18808	-24	6	0.26817	0.416	-26	-3	0.21401	0.37245	4	34	0.57033	0.75176
YDR312W	-2	62	0.71244	0.74813	-17	71	0.39526	0.86548	-5	11	0.80282	0.5188	6	14	0.8228	0.66586	-12	11	0.12765	0.2569
YDR312W	-1	73	0.72105	0.81055	-6	37	0.61335	0.59933	-8	28	0.73729	0.81399	-29	-8	0.17167	0.28374	-14	2	0.09796	0.10812
YDR313C	-7	11	0.66494	0.23442	1	28	0.72441	0.48103	-22	-3	0.31878	0.23022	-14	8	0.45575	0.56943	-1	20	0.42543	0.46688
YDR313C	-37	7	0.27148	0.18829	-14	32	0.45504	0.53541	-19	8	0.40722	0.45965	-7	-2	0.60326	0.38948	3	23	0.54224	0.53562
YDR314C	-26	9	0.42845	0.21113	-33	6	0.12669	0.16429	-26	-6	0.22361	0.18589	-35	9	0.09676	0.58646	-15	17	0.0862	0.39301
YDR314C	-33	5	0.33	0.16442	-45	15	0.04541	0.28466	-21	-9	0.34864	0.14315	-28	16	0.18616	0.69681	-5	-3	0.29824	0.05948
YDR316W	-37	16	0.27148	0.2981	-10	13	0.53977	0.255	-10	19	0.68429	0.67836	-35	45	0.09676	0.92164	-6	19	0.26775	0.44062
YDR316W	-22	42	0.4825	0.58875	-4	53	0.64842	0.76086	-10	18	0.68429	0.66115	-42	-2	0.0436	0.38948	-1	22	0.42543	0.51301
YDR317W	-58	-15	0.09443	0.01721	-6	48	0.61335	0.71545	-10	14	0.68429	0.58297	2	-14	0.76734	0.19295	-6	-3	0.26775	0.05948
YDR317W	-87	-18	0.03293	0.01101	-8	56	0.57852	0.78351	-16	4	0.50341	0.36893	-33	-18	0.11954	0.14129	-6	6	0.26775	0.16499
YDR318W	15	-8	0.82788	0.0452	-11	5	0.51954	0.15118	0	2	0.87166	0.32562	-40	16	0.0558	0.69681	3	8	0.54224	0.19981
YDR318W	5	4	0.765	0.15364	7	-4	0.79294	0.07346	11	-2	0.94837	0.24549	-7	14	0.60326	0.66586	-11	21	0.14786	0.48812
YDR319C	-33	2	0.33	0.13115	-10	12	0.53977	0.24085	-35	-7	0.08513	0.16981	-29	-18	0.17167	0.14129	-3	14	0.35795	0.32187
YDR319C	-24	4	0.45496	0.15364	-12	29	0.49701	0.49494	-34	-1	0.09528	0.26339	-30	-2	0.15671	0.38948	-14	18	0.09796	0.41584
YDR320C	-67	3	0.06322	0.14331	-9	43	0.5607	0.67038	-5	-1	0.80282	0.26339	-12	-41	0.50017	0.01438	-15	-4	0.0862	0.05263
YDR320C	-87	-12	0.03293	0.02581	-13	57	0.47516	0.78972	-30	-15	0.15272	0.08639	-14	2	0.45575	0.46404	-5	8	0.29824	0.19981
YDR323C	4	18	0.75857	0.32426	33	-7	0.91457	0.05334	-7	5	0.76065	0.39012	33	61	0.9641	0.95282	34	38	0.95569	0.80965
YDR323C	4	8	0.75857	0.19988	10	8	0.81984	0.18808	-31	-8	0.1338	0.15614	63	99	0.98262	0.97698	51	38	0.9791	0.80965
YDR327W	-39	-6	0.24555	0.05874	-11	0	0.51954	0.10312	-26	-5	0.22361	0.2007	-34	-6	0.10723	0.31722	1	28	0.48401	0.64501
YDR327W	-30	-2	0.37314	0.09213	-28	-11	0.18889	0.03541	-25	-5	0.24515	0.2007	-18	-6	0.3652	0.31722	-5	29	0.29824	0.66693
YDR328C	-23	74	0.46815	0.81594	1	74	0.72441	0.87594	-11	15	0.65819	0.60303	-1	13	0.71855	0.65044	-11	30	0.14786	0.6852
YDR328C	-39	58	0.24555	0.72128	0	36	0.70935	0.58553	-10	25	0.68429	0.77672	8	-13	0.84501	0.20642	-9	21	0.19079	0.48812
YDR329C	-5	51	0.6841	0.66873	-21	8	0.31708	0.18808	-30	-18	0.15272	0.06143	-9	32	0.5623	0.86181	9	21	0.70404	0.48812
YDR329C	-20	22	0.50877	0.37555	-30	14	0.16153	0.26983	-22	16	0.31878	0.62502	3	7	0.78414	0.55091	-1	11	0.42543	0.2569
YDR331W	-60	12	0.08422	0.24658	-10	30	0.53977	0.50862	-3	12	0.83462	0.54125	-4	6	0.6677	0.53549	21	41	0.89198	0.84391
YDR331W	-39	3	0.24555	0.14331	-15	29	0.43573	0.49494	-18	1	0.43879	0.30396	1	-25	0.75135	0.07513	2	27	0.51427	0.62537
YDR332W	-36	5	0.28537	0.16442	-10	11	0.53977	0.22545	-38	-17	0.06063	0.06918	-10	-15	0.54286	0.17869	14	9	0.80269	0.21705
YDR332W	-32	7	0.34411	0.18829	-9	15	0.5607	0.28466	-22	-9	0.31878	0.14315	14	6	0.89828	0.53549	14	20	0.80269	0.46688
YDR334W	-6	9	0.67527	0.21113	32	19	0.91193	0.34053	-34	-13	0.09528	0.10109	-11	27	0.52376	0.82533	1	9	0.48401	0.21705
YDR334W	-4	7	0.6942	0.18829	26	22	0.8956	0.38698	-34	4	0.09528	0.36893	-33	14	0.11954	0.66586	-16	0	0.07456	0.08495
YDR335W	-14	39	0.58531	0.56087	0	32	0.70935	0.53541	-14	28	0.5661	0.81399	-27	24	0.19951	0.79726	-5	30	0.29824	0.6852
YDR335W	-9	25	0.6436	0.41296	-9	14	0.5607	0.26983	-15	25	0.53624	0.77672	-55	34	0.01024	0.87504	-3	22	0.35795	0.51301
YDR337W	-20	50	0.50877	0.66069	-13	7	0.47516	0.17613	-19	22	0.40722	0.72965	0	-20	0.73443	0.11839	-7	12	0.24195	0.27574
YDR337W	-50	15	0.13952	0.28605	-1	46	0.69314	0.69544	-23	4	0.29348	0.36893	-2	-7	0.70014	0.2995	0	14	0.45375	0.32187
YDR344C	-12	6	0.60917	0.17636	-44	-2	0.05035	0.08714	-10	23	0.68429	0.74675	0	4	0.73443	0.50132	11	20	0.74743	0.46688
YDR344C	-23	-3	0.46815	0.08353	31	29	0.90871	0.49494	-18	27	0.43879	0.80009	-22	17	0.28155	0.71085	11	30	0.74743	0.6852
YDR346C	-29	15	0.38726	0.28605	-17	22	0.39526	0.38698	-22	35	0.31878	0.87565	15	3	0.90657	0.48256	-3	28	0.35795	0.64501
YDR346C	-37	17	0.27148	0.30866	-39	11	0.0753	0.22545	-25	40	0.24515	0.9046	1	-4	0.75135	0.35254	34	40	0.95569	0.83295
YDR351W	-45	-15	0.18255	0.01721	-46	-18	0.04127	0.01667	-18	-12	0.43879	0.11032	-19	5	0.34115	0.51846	23	35	0.90614	0.76729
YDR351W	-73	-12	0.05106	0.02581	-39	-4	0.0753	0.07346	-19	9	0.40722	0.47754	-28	-10	0.18616	0.2491	28	34	0.93514	0.75176
YDR353W	-18	51	0.5331	0.66873	3	66	0.74879	0.84214	-18	20	0.43879	0.69591	-44	-19	0.0352	0.12748	1	35	0.48401	0.76729
YDR353W	-45	22	0.18255	0.37555	8	54	0.80351	0.76983	-14	6	0.5661	0.416	5	-34	0.81003	0.03095	3	16	0.54224	0.368
YDR354W	-21	26	0.49512	0.42558	57	161	0.94389	0.98608	-5	50	0.80282	0.94597	-44	-5	0.0352	0.33517	-8	14	0.2174	0.32187
YDR354W	-25	67	0.44211	0.779	-18	26	0.37744	0.44918	-6	16	0.78185	0.62502	-18	-3	0.3652	0.37245	5	24	0.60059	0.55811
YDR357C	-34	47	0.31589	0.63614	-7	38	0.59611	0.61243	-21	-1	0.34864	0.26339	-53	-30	0.01288	0.0489	-14	0	0.09796	0.08495
YDR357C	-51	23	0.13333	0.38772	-11	35	0.51954	0.57323	-43	23	0.03054	0.74675	-30	-8	0.15671	0.28374	-21	4	0.03688	0.13553
YDR358W	-14	52	0.58531	0.67733	-14	46	0.45504	0.69544	-10	32	0.68429	0.85343	-9	-1	0.5623	0.40789	4	54	0.57033	0.93697
YDR358W	-33	22	0.33	0.37555	12	114	0.83329	0.96343	-6	21	0.78185	0.71176	-17	-27	0.38626	0.06316	5	15	0.60059	0.3422
YDR359C	-46	11	0.17223	0.23442	-25	19	0.24005	0.34053	-30	-13	0.15272	0.10109	-3	0	0.683	0.42722	-7	-4	0.24195	0.05263
YDR359C	-65	-7	0.06873	0.05197	-36	-1	0.09795	0.09484	-42	-7	0.03544	0.16981	-5	-9	0.64549	0.26659	1	-2	0.48401	0.06736
YDR362C	-31	-6	0.35903	0.05874	65	-25	0.94837	0.00793	-14	23	0.5661	0.74675	-13	39	0.47831	0.89978	19	27	0.87303	0.62537
YDR362C	43	19	0.89879	0.33803	107	-15	0.9624	0.02345	-19	5	0.40722	0.39012	-5	11	0.64549	0.61592	26	36	0.92646	0.78237
YDR363W	-49	-8	0.14733	0.0452	-42	-21	0.06058	0.01287	-24	-17	0.26817	0.06918	1	-19	0.75135	0.12748	-4	25	0.32701	0.58346
YDR363W	-37	1	0.27148	0.12002	-50	-11	0.02736	0.03541	-19	19	0.40722	0.67836	-1	-5	0.71855	0.33517	1	22	0.48401	0.51301
YDR363W-A	-26	0	0.42845	0.10923	22	60	0.88491	0.80961	-11	5	0.65819	0.39012	-23	6	0.26326	0.53549	-2	28	0.39175	0.64501
YDR363W-A	-28	12	0.4008	0.24658	26	55	0.8956	0.77696	-14	0	0.5661	0.28447	-9	9	0.5623	0.58646	18	32	0.86138	0.71865
YDR364C	-45	13	0.18255	0.26047	-30	8	0.16153	0.18808	-17	0	0.47059	0.28447	4	-34	0.79772	0.03095	4	31	0.57033	0.70221
YDR364C	-33	28	0.33	0.44899	-33	22	0.12669	0.38698	-31	3	0.1338	0.34488	6	0	0.8228	0.42722	26	37	0.92646	0.79812
YDR367W	-45	31	0.18255	0.48215	-10	45	0.53977	0.68705	-12	-8	0.63095	0.15614	-49	-10	0.02002	0.2491	-4	17	0.32701	0.39301
YDR367W	-59	19	0.08915	0.33803	-16	54	0.41515	0.76983	-29	38	0.16822	0.89343	-17	4	0.38626	0.50132	-18	18	0.05549	0.41584
YDR370C	-13	50	0.5969	0.66069	-33	22	0.12669	0.38698	-26	30	0.22361	0.83485	-6	26	0.62581	0.81774	14	30	0.80269	0.6852
YDR370C	-28	46	0.4008	0.62685	-20	20	0.33536	0.35559	-17	-1	0.47059	0.26339	-1	6	0.71855	0.53549	4	23	0.57033	0.53562
YDR371W	-11	23	0.62145	0.38772	-16	1	0.41515	0.1122	-17	2	0.47059	0.32562	-19	-2	0.34115	0.38948	16	30	0.8334	0.6852
YDR371W	-36	17	0.28537	0.30866	-25	0	0.24005	0.10312	-22	13	0.31878	0.56371	-12	1	0.50017	0.44379	14	30	0.80269	0.6852
YDR374C	-12	12	0.60917	0.24658	-35	12	0.106	0.24085	-16	-2	0.50341	0.24549	7	38	0.83396	0.89471	44	52	0.97316	0.9292
YDR374C	-16	20	0.5596	0.34893	-27	6	0.20406	0.16429	-15	-10	0.53624	0.13289	-27	72	0.19951	0.96306	41	76	0.96894	0.97682
YDR375C	30	10	0.87366	0.2226	-3	-13	0.66383	0.02885	7	-6	0.93104	0.18589	-41	-5	0.04982	0.33517	-3	9	0.35795	0.21705
YDR375C	2	12	0.74274	0.24658	14	-5	0.84663	0.06783	5	4	0.91907	0.36893	-18	-31	0.3652	0.04429	-3	16	0.35795	0.368
YDR376W	3	70	0.74985	0.79483	-21	16	0.31708	0.29972	-18	9	0.43879	0.47754	7	22	0.83396	0.77413	12	28	0.76729	0.64501
YDR376W	-2	64	0.71244	0.76179	-16	25	0.41515	0.43504	-29	9	0.16822	0.47754	8	16	0.84501	0.69681	16	37	0.8334	0.79812
YDR377W	-15	36	0.57292	0.5331	-34	40	0.11738	0.63612	-18	25	0.43879	0.77672	-25	24	0.22989	0.79726	-2	37	0.39175	0.79812
YDR377W	7	62	0.78164	0.74813	-28	24	0.18889	0.42044	-24	17	0.26817	0.64246	-54	7	0.01116	0.55091	-18	16	0.05549	0.368
YDR378C	-19	76	0.52117	0.8273	-5	25	0.63014	0.43504	-13	31	0.59995	0.84271	2	7	0.76734	0.55091	-13	17	0.11224	0.39301
YDR378C	-27	9	0.41422	0.21113	-17	12	0.39526	0.24085	-6	11	0.78185	0.5188	-1	24	0.71855	0.79726	-9	10	0.19079	0.23544
YDR379W	-8	60	0.65393	0.73585	-14	10	0.45504	0.21338	-41	-16	0.04103	0.07829	-17	-16	0.38626	0.16741	-10	20	0.17001	0.46688
YDR379W	-22	42	0.4825	0.58875	-24	35	0.26109	0.57323	-41	-25	0.04103	0.02951	7	-10	0.83396	0.2491	3	8	0.54224	0.19981
YDR381W	-61	4	0.08055	0.15364	35	71	0.91986	0.86548	-14	-13	0.5661	0.10109	-7	52	0.60326	0.93591	1	25	0.48401	0.58346
YDR381W	-58	10	0.09443	0.2226	7	60	0.79294	0.80961	-21	-12	0.34864	0.11032	-16	46	0.40835	0.92451	-1	-1	0.42543	0.07387
YDR382W	-41	3	0.22352	0.14331	-18	7	0.37744	0.17613	-2	7	0.84921	0.4372	-25	-13	0.22989	0.20642	-13	14	0.11224	0.32187
YDR382W	-41	11	0.22352	0.23442	-27	2	0.20406	0.12002	-13	4	0.59995	0.36893	-19	3	0.34115	0.48256	-1	41	0.42543	0.84391
YDR383C	-58	25	0.09443	0.41296	-12	31	0.49701	0.52379	-18	5	0.43879	0.39012	-16	8	0.40835	0.56943	-3	36	0.35795	0.78237
YDR383C	-69	30	0.05932	0.47114	-29	7	0.17475	0.17613	-28	-17	0.1852	0.06918	-8	-11	0.58405	0.23392	3	31	0.54224	0.70221
YDR388W	-50	-4	0.13952	0.07596	17	75	0.86261	0.87928	-15	-2	0.53624	0.24549	-15	-2	0.43217	0.38948	-7	6	0.24195	0.16499
YDR388W	-25	-3	0.44211	0.08353	17	93	0.86261	0.934	-14	1	0.5661	0.30396	-15	21	0.43217	0.76182	5	16	0.60059	0.368
YDR389W	-42	2	0.21308	0.13115	-16	-1	0.41515	0.09484	-29	-7	0.16822	0.16981	-16	6	0.40835	0.53549	-2	29	0.39175	0.66693
YDR389W	-28	24	0.4008	0.40137	-34	20	0.11738	0.35559	-19	12	0.40722	0.54125	-16	-20	0.40835	0.11839	10	18	0.72539	0.41584
YDR390C	-50	31	0.13952	0.48215	-35	26	0.106	0.44918	-37	-12	0.06861	0.11032	1	-24	0.75135	0.0841	-6	18	0.26775	0.41584
YDR390C	-36	41	0.28537	0.5798	-32	7	0.136	0.17613	-42	-8	0.03544	0.15614	-15	-20	0.43217	0.11839	11	24	0.74743	0.55811
YDR394W	-8	49	0.65393	0.65289	22	78	0.88491	0.89215	-8	15	0.73729	0.60303	n	n	n	n	-10	12	0.17001	0.27574
YDR394W	0	77	0.72851	0.83488	-5	17	0.63014	0.31352	2	11	0.89218	0.5188	n	n	n	n	4	13	0.57033	0.29801
YDR395W	-32	27	0.34411	0.4366	-32	31	0.136	0.52379	-25	-12	0.24515	0.11032	-29	3	0.17167	0.48256	-12	23	0.12765	0.53562
YDR395W	-26	17	0.42845	0.30866	-33	20	0.12669	0.35559	-18	-5	0.43879	0.2007	-40	-8	0.0558	0.28374	-21	6	0.03688	0.16499
YDR397C	-14	8	0.58531	0.19988	20	84	0.87617	0.91043	3	25	0.90289	0.77672	-5	25	0.64549	0.8075	-4	8	0.32701	0.19981
YDR397C	-36	-1	0.28537	0.09959	9	93	0.81248	0.934	-25	23	0.24515	0.74675	-22	-8	0.28155	0.28374	8	19	0.68029	0.44062
YDR398W	-18	14	0.5331	0.27366	-1	67	0.69314	0.8464	0	53	0.87166	0.95258	-9	35	0.5623	0.88068	4	9	0.57033	0.21705
YDR398W	-25	29	0.44211	0.46058	14	84	0.84663	0.91043	-5	28	0.80282	0.81399	3	48	0.78414	0.92739	10	5	0.72539	0.14912
YDR399W	-33	39	0.33	0.56087	-29	40	0.17475	0.63612	-39	27	0.05288	0.80009	-23	-40	0.26326	0.01633	-13	15	0.11224	0.3422
YDR399W	-40	24	0.23511	0.40137	-43	43	0.05495	0.67038	-38	10	0.06063	0.49794	-14	-4	0.45575	0.35254	3	19	0.54224	0.44062
YDR400W	-27	34	0.41422	0.51222	-43	-4	0.05495	0.07346	-21	4	0.34864	0.36893	21	9	0.93683	0.58646	19	34	0.87303	0.75176
YDR400W	-23	27	0.46815	0.4366	-47	-7	0.03747	0.05334	-11	2	0.65819	0.32562	0	17	0.73443	0.71085	-6	7	0.26775	0.18291
YDR401W	-44	22	0.19196	0.37555	-19	5	0.35709	0.15118	-26	13	0.22361	0.56371	-4	42	0.6677	0.9122	25	36	0.9203	0.78237
YDR401W	-26	35	0.42845	0.52208	73	79	0.95332	0.89583	-19	1	0.40722	0.30396	8	16	0.84501	0.69681	9	20	0.70404	0.46688
YDR403W	-43	26	0.20218	0.42558	-39	-8	0.0753	0.04771	-16	26	0.50341	0.78926	-2	-21	0.70014	0.11011	-9	25	0.19079	0.58346
YDR403W	-31	17	0.35903	0.30866	-9	61	0.5607	0.81558	-34	-8	0.09528	0.15614	-20	3	0.32067	0.48256	15	31	0.81947	0.70221
YDR404C	-17	12	0.54652	0.24658	13	72	0.84088	0.86962	-13	25	0.59995	0.77672	-32	-7	0.13128	0.2995	6	16	0.62811	0.368
YDR404C	-30	11	0.37314	0.23442	38	118	0.92561	0.96608	-13	40	0.59995	0.9046	-12	19	0.50017	0.73858	2	38	0.51427	0.80965
YDR405W	-147	3	0.00195	0.14331	26	76	0.8956	0.88457	-42	-12	0.03544	0.11032	-39	3	0.06385	0.48256	-6	9	0.26775	0.21705
YDR405W	-119	19	0.01032	0.33803	9	106	0.81248	0.95504	-31	-29	0.1338	0.01766	-29	-31	0.17167	0.04429	37	39	0.96266	0.82153
YDR411C	3267	76	0.9868	0.8273	1150	38	0.98712	0.61243	144	47	0.987	0.93708	-17	-12	0.38626	0.21988	-2	26	0.39175	0.60687
YDR411C	3293	51	0.98691	0.66873	1099	55	0.98666	0.77696	120	45	0.98586	0.9291	1	6	0.75135	0.53549	8	23	0.68029	0.53562
YDR414C	32	52	0.8786	0.67733	-35	15	0.106	0.28466	-15	0	0.53624	0.28447	-21	5	0.30065	0.51846	-7	1	0.24195	0.09648
YDR414C	-23	26	0.46815	0.42558	-60	-9	0.01264	0.04414	-11	7	0.65819	0.4372	-36	-19	0.08767	0.12748	4	-9	0.57033	0.02911
YDR415C	-46	9	0.17223	0.21113	4	17	0.76178	0.31352	-15	0	0.53624	0.28447	11	10	0.87343	0.60142	16	52	0.8334	0.9292
YDR415C	-34	-8	0.31589	0.0452	4	11	0.76178	0.22545	-31	27	0.1338	0.80009	-15	40	0.43217	0.90369	6	38	0.62811	0.80965
YDR416W	-47	1	0.16201	0.12002	-13	5	0.47516	0.15118	-21	2	0.34864	0.32562	-37	4	0.07973	0.50132	-19	14	0.04909	0.32187
YDR416W	-24	5	0.45496	0.16442	-13	9	0.47516	0.20085	-11	16	0.65819	0.62502	-15	-24	0.43217	0.0841	-17	13	0.06474	0.29801
YDR419W	-53	10	0.12002	0.2226	-44	-10	0.05035	0.03839	-55	-41	0.00729	0.00455	-22	-15	0.28155	0.17869	5	16	0.60059	0.368
YDR419W	-66	19	0.06597	0.33803	-44	5	0.05035	0.15118	-46	-31	0.02154	0.01424	-10	40	0.54286	0.90369	2	16	0.51427	0.368
YDR423C	-46	22	0.17223	0.37555	-21	-4	0.31708	0.07346	-23	30	0.29348	0.83485	n	n	n	n	-1	17	0.42543	0.39301
YDR423C	-18	25	0.5331	0.41296	-13	4	0.47516	0.13968	-16	10	0.50341	0.49794	-10	38	0.54286	0.89471	5	17	0.60059	0.39301
YDR425W	-14	63	0.58531	0.75547	-9	-2	0.5607	0.08714	-20	14	0.37679	0.58297	-43	-2	0.03981	0.38948	8	26	0.68029	0.60687
YDR425W	-16	41	0.5596	0.5798	-8	19	0.57852	0.34053	-15	-3	0.53624	0.23022	-55	-11	0.01024	0.23392	-3	17	0.35795	0.39301
YDR427W	-53	18	0.12002	0.32426	-85	-9	0.00425	0.04414	-26	-27	0.22361	0.02416	-10	-23	0.54286	0.0925	-6	-4	0.26775	0.05263
YDR427W	-4	25	0.6942	0.41296	55	23	0.94194	0.40388	-78	-26	0.00216	0.02666	-10	-4	0.54286	0.35254	0	-3	0.45375	0.05948
YDR428C	-15	44	0.57292	0.6078	-35	24	0.106	0.42044	-17	44	0.47059	0.92432	-11	-2	0.52376	0.38948	10	29	0.72539	0.66693
YDR428C	-13	29	0.5969	0.46058	-23	13	0.27891	0.255	-6	23	0.78185	0.74675	-19	-33	0.34115	0.03543	6	28	0.62811	0.64501
YDR429C	68	57	0.92633	0.716	24	52	0.88997	0.75293	14	55	0.95589	0.95634	-13	28	0.47831	0.8327	4	16	0.57033	0.368
YDR429C	56	69	0.91612	0.78921	18	63	0.8679	0.82593	0	52	0.87166	0.95007	-7	8	0.60326	0.56943	5	17	0.60059	0.39301
YDR432W	8679	655	0.99323	0.99254	4915	98	0.99425	0.94412	1306	212	0.99395	0.9943	7238	9298	0.99815	0.99781	3582	3661	0.99817	0.99783
YDR432W	8489	675	0.99288	0.99277	5505	71	0.99528	0.86548	1279	240	0.99384	0.99441	7352	9523	0.99827	0.99792	3252	3473	0.99783	0.99748
YDR434W	n	n	n	n	n	n	n	n	-80	-6	0.00182	0.18589	-16	35	0.40835	0.88068	27	42	0.93217	0.85476
YDR434W	n	n	n	n	n	n	n	n	452	-54	0.99213	0.00125	-8	13	0.58405	0.65044	6	33	0.62811	0.73361
YDR437W	-97	-1	0.02398	0.09959	1	52	0.72441	0.75293	-42	10	0.03544	0.49794	-36	9	0.08767	0.58646	-14	11	0.09796	0.2569
YDR437W	-107	0	0.01594	0.10923	13	297	0.84088	0.99494	-28	-29	0.1852	0.01766	-17	7	0.38626	0.55091	-42	-17	0.00388	0.01039
YDR439W	75	59	0.93034	0.72782	198	111	0.97114	0.96091	-83	26	0.0017	0.78926	-16	-31	0.40835	0.04429	39	41	0.96563	0.84391
YDR439W	16	51	0.83281	0.66873	38	91	0.92561	0.92975	-54	22	0.00809	0.72965	19	-50	0.92831	0.00483	32	66	0.94998	0.96722
YDR440W	-27	62	0.41422	0.74813	-32	1	0.136	0.1122	-32	-17	0.12149	0.06918	-16	-25	0.40835	0.07513	1	16	0.48401	0.368
YDR440W	-25	61	0.44211	0.74216	-28	5	0.18889	0.15118	-33	-11	0.1069	0.12149	-31	3	0.14359	0.48256	7	-2	0.65528	0.06736
YDR441C	-23	10	0.46815	0.2226	4	41	0.76178	0.6483	-7	45	0.76065	0.9291	10	-7	0.8656	0.2995	20	29	0.88422	0.66693
YDR441C	-24	23	0.45496	0.38772	-3	15	0.66383	0.28466	-16	24	0.50341	0.76179	8	30	0.84501	0.84915	12	34	0.76729	0.75176
YDR443C	-21	34	0.49512	0.51222	-12	-5	0.49701	0.06783	-12	-7	0.63095	0.16981	-21	0	0.30065	0.42722	-5	12	0.29824	0.27574
YDR443C	12	76	0.81273	0.8273	-29	11	0.17475	0.22545	-21	3	0.34864	0.34488	-28	-31	0.18616	0.04429	6	18	0.62811	0.41584
YDR444W	-26	12	0.42845	0.24658	-36	4	0.09795	0.13968	-11	9	0.65819	0.47754	-49	-33	0.02002	0.03543	7	19	0.65528	0.44062
YDR444W	-34	-3	0.31589	0.08353	25	116	0.89284	0.9647	-8	16	0.73729	0.62502	-46	-6	0.02715	0.31722	18	39	0.86138	0.82153
YDR448W	7	19	0.78164	0.33803	-11	-12	0.51954	0.03196	-14	-7	0.5661	0.16981	-30	35	0.15671	0.88068	-10	8	0.17001	0.19981
YDR448W	-7	14	0.66494	0.27366	-10	-13	0.53977	0.02885	0	-7	0.87166	0.16981	-28	-3	0.18616	0.37245	0	18	0.45375	0.41584
YDR449C	-47	8	0.16201	0.19988	-23	8	0.27891	0.18808	-23	10	0.29348	0.49794	10	28	0.8656	0.8327	-9	22	0.19079	0.51301
YDR449C	-24	4	0.45496	0.15364	-21	29	0.31708	0.49494	-23	-9	0.29348	0.14315	-18	2	0.3652	0.46404	4	37	0.57033	0.79812
YDR453C	-10	53	0.63293	0.68514	-6	7	0.61335	0.17613	-6	26	0.78185	0.78926	6	19	0.8228	0.73858	19	38	0.87303	0.80965
YDR453C	-21	56	0.49512	0.70808	-35	21	0.106	0.371	4	29	0.91201	0.82288	-6	10	0.62581	0.60142	30	54	0.94176	0.93697
YDR454C	-30	3	0.37314	0.14331	-3	74	0.66383	0.87594	-16	3	0.50341	0.34488	4	-17	0.79772	0.15406	-15	-2	0.0862	0.06736
YDR454C	-41	0	0.22352	0.10923	22	72	0.88491	0.86962	-11	23	0.65819	0.74675	-35	-7	0.09676	0.2995	-11	27	0.14786	0.62537
YDR456W	-8	21	0.65393	0.36247	-27	23	0.20406	0.40388	-11	5	0.65819	0.39012	-13	4	0.47831	0.50132	6	21	0.62811	0.48812
YDR456W	2	53	0.74274	0.68514	0	53	0.70935	0.76086	-10	27	0.68429	0.80009	2	30	0.76734	0.84915	-8	21	0.2174	0.48812
YDR458C	-27	37	0.41422	0.54297	-28	8	0.18889	0.18808	-21	0	0.34864	0.28447	-17	-4	0.38626	0.35254	3	29	0.54224	0.66693
YDR458C	-22	35	0.4825	0.52208	-19	1	0.35709	0.1122	-36	-16	0.07658	0.07829	4	-10	0.79772	0.2491	-14	1	0.09796	0.09648
YDR459C	15	78	0.82788	0.83878	-27	22	0.20406	0.38698	-23	-7	0.29348	0.16981	-37	-19	0.07973	0.12748	5	-3	0.60059	0.05948
YDR459C	-34	18	0.31589	0.32426	-44	16	0.05035	0.29972	-23	-18	0.29348	0.06143	-54	-18	0.01116	0.14129	0	-3	0.45375	0.05948
YDR460W	-37	15	0.27148	0.28605	-23	8	0.27891	0.18808	-30	0	0.15272	0.28447	-26	-2	0.21401	0.38948	-2	15	0.39175	0.3422
YDR460W	-44	-3	0.19196	0.08353	-19	1	0.35709	0.1122	-25	-1	0.24515	0.26339	-30	10	0.15671	0.60142	-6	16	0.26775	0.368
YDR462W	-57	-11	0.09913	0.02925	-32	54	0.136	0.76983	-36	7	0.07658	0.4372	-6	26	0.62581	0.81774	9	-1	0.70404	0.07387
YDR462W	-46	-8	0.17223	0.0452	-7	50	0.59611	0.73419	-18	11	0.43879	0.5188	6	-10	0.8228	0.2491	-1	21	0.42543	0.48812
YDR465C	-38	-8	0.25943	0.0452	-16	54	0.41515	0.76983	-27	6	0.20344	0.416	2	7	0.76734	0.55091	-15	0	0.0862	0.08495
YDR465C	-64	-19	0.07114	0.00952	-12	108	0.49701	0.95769	-12	18	0.63095	0.66115	15	15	0.90657	0.68012	-14	7	0.09796	0.18291
YDR467C	-53	-5	0.12002	0.06804	-10	174	0.53977	0.98769	-18	-16	0.43879	0.07829	-5	4	0.64549	0.50132	-11	1	0.14786	0.09648
YDR467C	-55	4	0.10831	0.15364	11	88	0.82674	0.92239	-14	-7	0.5661	0.16981	-30	7	0.15671	0.55091	-2	-5	0.39175	0.04761
YDR468C	-41	14	0.22352	0.27366	-44	45	0.05035	0.68705	-24	-6	0.26817	0.18589	-13	21	0.47831	0.76182	-7	-1	0.24195	0.07387
YDR468C	-36	28	0.28537	0.44899	-17	47	0.39526	0.70452	-45	-6	0.02382	0.18589	-4	3	0.6677	0.48256	-17	10	0.06474	0.23544
YDR469W	-44	17	0.19196	0.30866	0	83	0.70935	0.90779	-24	-4	0.26817	0.21461	-23	-12	0.26326	0.21988	-5	-8	0.29824	0.03322
YDR469W	-61	-7	0.08055	0.05197	-32	59	0.136	0.80363	-8	5	0.73729	0.39012	4	18	0.79772	0.72477	-16	-4	0.07456	0.05263
YDR470C	-42	44	0.21308	0.6078	-39	21	0.0753	0.371	-22	22	0.31878	0.72965	-8	18	0.58405	0.72477	20	56	0.88422	0.94427
YDR470C	-55	24	0.10831	0.40137	-25	40	0.24005	0.63612	-20	7	0.37679	0.4372	0	23	0.73443	0.78771	17	55	0.84813	0.94096
YDR471W	7	66	0.78164	0.77292	-27	48	0.20406	0.71545	-18	33	0.43879	0.86015	-57	26	0.00839	0.81774	-14	8	0.09796	0.19981
YDR471W	22	76	0.85117	0.8273	-7	30	0.59611	0.50862	-16	21	0.50341	0.71176	-76	11	0.00195	0.61592	6	36	0.62811	0.78237
YDR472W	-54	-18	0.11405	0.01101	-20	36	0.33536	0.58553	-38	-10	0.06063	0.13289	-3	32	0.683	0.86181	-6	7	0.26775	0.18291
YDR472W	-64	-20	0.07114	0.00803	-25	6	0.24005	0.16429	-19	-5	0.40722	0.2007	-24	46	0.24657	0.92451	-3	4	0.35795	0.13553
YDR473C	-36	31	0.28537	0.48215	-52	-7	0.02253	0.05334	-19	24	0.40722	0.76179	-24	-22	0.24657	0.1009	33	51	0.95272	0.92498
YDR473C	-37	42	0.27148	0.58875	-35	-2	0.106	0.08714	-7	31	0.76065	0.84271	18	16	0.92336	0.69681	22	54	0.89849	0.93697
YDR474C	-26	45	0.42845	0.61767	-32	37	0.136	0.59933	-18	20	0.43879	0.69591	-10	22	0.54286	0.77413	26	70	0.92646	0.97213
YDR474C	-26	36	0.42845	0.5331	0	60	0.70935	0.80961	-11	24	0.65819	0.76179	-14	20	0.45575	0.74962	17	46	0.84813	0.89129
YDR475C	-15	62	0.57292	0.74813	-46	18	0.04127	0.32754	-4	32	0.81912	0.85343	13	-9	0.88931	0.26659	19	40	0.87303	0.83295
YDR475C	25	108	0.8592	0.9292	-44	20	0.05035	0.35559	-4	6	0.81912	0.416	31	7	0.96122	0.55091	36	47	0.96072	0.89883
YDR476C	-34	41	0.31589	0.5798	-25	33	0.24005	0.54828	-16	24	0.50341	0.76179	-16	23	0.40835	0.78771	5	28	0.60059	0.64501
YDR476C	n	n	n	n	n	n	n	n	-13	41	0.59995	0.90984	18	16	0.92336	0.69681	-1	39	0.42543	0.82153
YDR478W	12	15	0.81273	0.28605	1	-14	0.72441	0.02586	14	19	0.95589	0.67836	9	-7	0.8549	0.2995	1	63	0.48401	0.96129
YDR478W	19	0	0.84337	0.10923	-10	-1	0.53977	0.09484	9	21	0.94118	0.71176	3	10	0.78414	0.60142	14	41	0.80269	0.84391
YDR479C	-27	2	0.41422	0.13115	-30	-13	0.16153	0.02885	-31	-22	0.1338	0.03989	37	-7	0.96927	0.2995	4	51	0.57033	0.92498
YDR479C	-12	59	0.60917	0.72782	-45	24	0.04541	0.42044	-39	-27	0.05288	0.02416	27	19	0.95259	0.73858	10	57	0.72539	0.94747
YDR480W	-61	-3	0.08055	0.08353	-25	-15	0.24005	0.02345	5	38	0.91907	0.89343	-30	-11	0.15671	0.23392	23	2	0.90614	0.10812
YDR480W	-39	6	0.24555	0.17636	0	10	0.70935	0.21338	-8	0	0.73729	0.28447	-58	-20	0.00759	0.11839	49	5	0.9775	0.14912
YDR483W	-63	-11	0.07423	0.02925	-31	-4	0.1483	0.07346	-43	-14	0.03054	0.09402	-33	-1	0.11954	0.40789	8	9	0.68029	0.21705
YDR483W	-37	7	0.27148	0.18829	-22	2	0.29799	0.12002	-31	-21	0.1338	0.04638	-23	-16	0.26326	0.16741	5	15	0.60059	0.3422
YDR484W	-31	-6	0.35903	0.05874	-35	27	0.106	0.46481	-5	17	0.80282	0.64246	-19	5	0.34115	0.51846	8	20	0.68029	0.46688
YDR484W	10	70	0.80045	0.79483	-15	17	0.43573	0.31352	-6	1	0.78185	0.30396	-11	-4	0.52376	0.35254	2	14	0.51427	0.32187
YDR486C	3	84	0.74985	0.86219	-41	41	0.06426	0.6483	-20	27	0.37679	0.80009	11	29	0.87343	0.84029	29	50	0.93845	0.91813
YDR486C	-16	70	0.5596	0.79483	-31	45	0.1483	0.68705	-21	19	0.34864	0.67836	39	52	0.97157	0.93591	-15	56	0.0862	0.94427
YDR487C	-51	45	0.13333	0.61767	6	70	0.7827	0.86088	-6	35	0.78185	0.87565	-27	6	0.19951	0.53549	1	34	0.48401	0.75176
YDR487C	-75	19	0.04761	0.33803	3	51	0.74879	0.74384	-27	-7	0.20344	0.16981	-25	8	0.22989	0.56943	-1	25	0.42543	0.58346
YDR488C	-10	49	0.63293	0.65289	-21	23	0.31708	0.40388	-14	11	0.5661	0.5188	-4	16	0.6677	0.69681	18	49	0.86138	0.91208
YDR488C	-15	46	0.57292	0.62685	-4	19	0.64842	0.34053	-25	4	0.24515	0.36893	-26	-15	0.21401	0.17869	11	29	0.74743	0.66693
YDR489W	-20	73	0.50877	0.81055	-24	31	0.26109	0.52379	-20	-15	0.37679	0.08639	-31	-13	0.14359	0.20642	-4	10	0.32701	0.23544
YDR489W	-51	50	0.13333	0.66069	-12	30	0.49701	0.50862	-45	-31	0.02382	0.01424	-36	-13	0.08767	0.20642	-13	28	0.11224	0.64501
YDR491C	-22	115	0.4825	0.93998	-33	23	0.12669	0.40388	-34	9	0.09528	0.47754	15	-18	0.90657	0.14129	-4	27	0.32701	0.62537
YDR491C	6	95	0.77349	0.89764	-29	33	0.17475	0.54828	-48	-25	0.01709	0.02951	4	-1	0.79772	0.40789	-6	39	0.26775	0.82153
YDR493W	-6	24	0.67527	0.40137	-4	31	0.64842	0.52379	-22	15	0.31878	0.60303	14	6	0.89828	0.53549	3	24	0.54224	0.55811
YDR493W	-8	59	0.65393	0.72782	-22	29	0.29799	0.49494	-15	19	0.53624	0.67836	-20	21	0.32067	0.76182	0	29	0.45375	0.66693
YDR494W	-10	76	0.63293	0.8273	-23	15	0.27891	0.28466	-43	5	0.03054	0.39012	-13	12	0.47831	0.63099	8	48	0.68029	0.905
YDR494W	-28	71	0.4008	0.8016	-33	29	0.12669	0.49494	-29	-5	0.16822	0.2007	5	6	0.81003	0.53549	11	43	0.74743	0.86526
YDR497C	-136	2	0.00344	0.13115	-75	-6	0.00563	0.0607	-6	16	0.78185	0.62502	-19	0	0.34115	0.42722	29	18	0.93845	0.41584
YDR497C	-63	35	0.07423	0.52208	-57	16	0.01552	0.29972	-9	45	0.71153	0.9291	8	36	0.84501	0.88654	3	36	0.54224	0.78237
YDR498C	-64	-23	0.07114	0.00516	2	22	0.73925	0.38698	-17	-16	0.47059	0.07829	27	9	0.95259	0.58646	0	26	0.45375	0.60687
YDR498C	-56	-20	0.10338	0.00803	-13	14	0.47516	0.26983	-19	-40	0.40722	0.00501	-10	28	0.54286	0.8327	-26	-22	0.01724	0.00536
YDR499W	-72	8	0.05266	0.19988	-23	40	0.27891	0.63612	-52	6	0.0098	0.416	-6	62	0.62581	0.95397	14	54	0.80269	0.93697
YDR499W	-75	-1	0.04761	0.09959	30	24	0.90653	0.42044	-73	29	0.0025	0.82288	-9	78	0.5623	0.96732	13	47	0.78625	0.89883
YDR500C	-12	98	0.60917	0.90567	3	62	0.74879	0.82087	23	33	0.96888	0.86015	-11	35	0.52376	0.88068	9	51	0.70404	0.92498
YDR500C	-34	63	0.31589	0.75547	-8	56	0.57852	0.78351	-17	40	0.47059	0.9046	44	22	0.97457	0.77413	7	51	0.65528	0.92498
YDR502C	-16	26	0.5596	0.42558	-17	15	0.39526	0.28466	-7	24	0.76065	0.76179	-35	6	0.09676	0.53549	3	15	0.54224	0.3422
YDR502C	-21	31	0.49512	0.48215	13	46	0.84088	0.69544	-25	-19	0.24515	0.05561	0	-32	0.73443	0.03935	4	18	0.57033	0.41584
YDR504C	51	143	0.91072	0.96683	-27	23	0.20406	0.40388	-6	35	0.78185	0.87565	-34	-6	0.10723	0.31722	4	20	0.57033	0.46688
YDR504C	36	142	0.88743	0.96637	-5	46	0.63014	0.69544	-2	41	0.84921	0.90984	-29	16	0.17167	0.69681	1	39	0.48401	0.82153
YDR505C	16	82	0.83281	0.85415	-19	5	0.35709	0.15118	-19	-11	0.40722	0.12149	-46	-6	0.02715	0.31722	-18	-1	0.05549	0.07387
YDR505C	0	64	0.72851	0.76179	3	41	0.74879	0.6483	-11	13	0.65819	0.56371	-15	-12	0.43217	0.21988	-4	28	0.32701	0.64501
YDR506C	-54	65	0.11405	0.76718	-24	13	0.26109	0.255	-26	23	0.22361	0.74675	2	-19	0.76734	0.12748	6	17	0.62811	0.39301
YDR506C	-73	75	0.05106	0.82099	-4	50	0.64842	0.73419	-32	12	0.12149	0.54125	-5	-22	0.64549	0.1009	-9	19	0.19079	0.44062
YDR507C	18	25	0.84084	0.41296	-1	12	0.69314	0.24085	-25	-3	0.24515	0.23022	-8	12	0.58405	0.63099	-8	-4	0.2174	0.05263
YDR507C	-11	29	0.62145	0.46058	-27	30	0.20406	0.50862	-31	4	0.1338	0.36893	-16	-26	0.40835	0.06869	-17	-35	0.06474	0.00079
YDR508C	-142	20	0.00252	0.34893	12	62	0.83329	0.82087	-40	-29	0.04672	0.01766	-13	-5	0.47831	0.33517	-7	30	0.24195	0.6852
YDR508C	-124	46	0.00814	0.62685	27	107	0.89951	0.95642	-15	35	0.53624	0.87565	5	-10	0.81003	0.2491	6	14	0.62811	0.32187
YDR509W	-20	3	0.50877	0.14331	-37	-19	0.09048	0.01517	2	-31	0.89218	0.01424	-53	-12	0.01288	0.21988	-4	7	0.32701	0.18291
YDR509W	-33	21	0.33	0.36247	-44	-3	0.05035	0.08093	-26	-19	0.22361	0.05561	-35	-10	0.09676	0.2491	1	24	0.48401	0.55811
YDR510W	31	111	0.87584	0.93436	-6	42	0.61335	0.65957	-6	29	0.78185	0.82288	5	-16	0.81003	0.16741	1	38	0.48401	0.80965
YDR510W	34	119	0.8833	0.94606	-19	19	0.35709	0.34053	-9	38	0.71153	0.89343	-38	-19	0.07191	0.12748	13	33	0.78625	0.73361
YDR511W	-73	99	0.05106	0.90935	-13	61	0.47516	0.81558	-41	-11	0.04103	0.12149	13	9	0.88931	0.58646	17	17	0.84813	0.39301
YDR511W	-74	88	0.04991	0.87527	38	159	0.92561	0.98597	-25	1	0.24515	0.30396	-7	8	0.60326	0.56943	4	39	0.57033	0.82153
YDR512C	25	94	0.8592	0.89489	-3	45	0.66383	0.68705	-6	10	0.78185	0.49794	-31	-25	0.14359	0.07513	-15	33	0.0862	0.73361
YDR512C	5	68	0.765	0.7845	8	15	0.80351	0.28466	-12	31	0.63095	0.84271	-32	12	0.13128	0.63099	7	23	0.65528	0.53562
YDR513W	64	102	0.92369	0.91669	18	32	0.8679	0.53541	1	7	0.88203	0.4372	-28	-20	0.18616	0.11839	4	34	0.57033	0.75176
YDR513W	14	33	0.82226	0.50327	-10	15	0.53977	0.28466	16	24	0.95976	0.76179	-10	24	0.54286	0.79726	10	35	0.72539	0.76729
YDR514C	-92	78	0.02753	0.83878	-6	63	0.61335	0.82593	-33	16	0.1069	0.62502	12	33	0.88137	0.86848	-12	29	0.12765	0.66693
YDR514C	-89	99	0.03144	0.90935	-17	84	0.39526	0.91043	-29	3	0.16822	0.34488	15	15	0.90657	0.68012	-23	26	0.02626	0.60687
YDR515W	13	78	0.81721	0.83878	-12	42	0.49701	0.65957	-22	23	0.31878	0.74675	-30	-22	0.15671	0.1009	8	32	0.68029	0.71865
YDR515W	-1	77	0.72105	0.83488	-19	2	0.35709	0.12002	-9	23	0.71153	0.74675	-17	2	0.38626	0.46404	15	31	0.81947	0.70221
YDR516C	-68	119	0.06081	0.94606	27	129	0.89951	0.97332	-17	73	0.47059	0.97595	12	-21	0.88137	0.11011	-8	20	0.2174	0.46688
YDR516C	-12	139	0.60917	0.96488	27	77	0.89951	0.88813	-3	52	0.83462	0.95007	-29	16	0.17167	0.69681	11	36	0.74743	0.78237
YDR517W	-50	11	0.13952	0.23442	-23	-6	0.27891	0.0607	-30	5	0.15272	0.39012	-20	1	0.32067	0.44379	-1	37	0.42543	0.79812
YDR517W	-33	13	0.33	0.26047	-9	27	0.5607	0.46481	-4	-3	0.81912	0.23022	-23	-17	0.26326	0.15406	-10	35	0.17001	0.76729
YDR518W	-59	-12	0.08915	0.02581	-4	42	0.64842	0.65957	-21	-1	0.34864	0.26339	22	24	0.94016	0.79726	3	12	0.54224	0.27574
YDR518W	-76	-17	0.04693	0.01296	-12	43	0.49701	0.67038	-19	-16	0.40722	0.07829	34	41	0.96582	0.90829	-23	10	0.02626	0.23544
YDR520C	-39	19	0.24555	0.33803	6	11	0.7827	0.22545	-27	1	0.20344	0.30396	-17	-11	0.38626	0.23392	-2	8	0.39175	0.19981
YDR520C	-11	62	0.62145	0.74813	-27	-11	0.20406	0.03541	-1	9	0.86152	0.47754	-38	-32	0.07191	0.03935	0	7	0.45375	0.18291
YDR521W	-138	34	0.00286	0.51222	16	78	0.85858	0.89215	-19	33	0.40722	0.86015	-17	-19	0.38626	0.12748	9	38	0.70404	0.80965
YDR521W	-129	46	0.00596	0.62685	-14	77	0.45504	0.88813	-18	11	0.43879	0.5188	-7	35	0.60326	0.88068	1	30	0.48401	0.6852
YDR522C	-8	65	0.65393	0.76718	-10	30	0.53977	0.50862	-6	27	0.78185	0.80009	-16	-12	0.40835	0.21988	9	23	0.70404	0.53562
YDR522C	7	63	0.78164	0.75547	-26	44	0.22372	0.679	4	26	0.91201	0.78926	-25	2	0.22989	0.46404	-8	35	0.2174	0.76729
YDR523C	-96	87	0.02467	0.87137	-3	71	0.66383	0.86548	-18	1	0.43879	0.30396	-5	10	0.64549	0.60142	-21	6	0.03688	0.16499
YDR523C	-162	46	0.00091	0.62685	4	83	0.76178	0.90779	-20	4	0.37679	0.36893	-9	-18	0.5623	0.14129	-12	10	0.12765	0.23544
YDR524C	-18	24	0.5331	0.40137	-3	34	0.66383	0.56173	-18	11	0.43879	0.5188	-33	0	0.11954	0.42722	-1	10	0.42543	0.23544
YDR524C	-29	39	0.38726	0.56087	-25	22	0.24005	0.38698	-9	7	0.71153	0.4372	-27	12	0.19951	0.63099	8	19	0.68029	0.44062
YDR525W	-39	2	0.24555	0.13115	20	51	0.87617	0.74384	-37	-1	0.06861	0.26339	11	3	0.87343	0.48256	8	31	0.68029	0.70221
YDR525W	-78	-8	0.04452	0.0452	-1	59	0.69314	0.80363	-26	-9	0.22361	0.14315	-28	-18	0.18616	0.14129	3	20	0.54224	0.46688
YDR528W	-170	9	0.00045	0.21113	-10	60	0.53977	0.80961	-36	-7	0.07658	0.16981	4	-12	0.79772	0.21988	-1	22	0.42543	0.51301
YDR528W	-107	56	0.01594	0.70808	36	105	0.92182	0.9532	-31	-16	0.1338	0.07829	12	-27	0.88137	0.06316	3	36	0.54224	0.78237
YDR529C	-63	16	0.07423	0.2981	-47	-7	0.03747	0.05334	-6	4	0.78185	0.36893	-32	-8	0.13128	0.28374	3	29	0.54224	0.66693
YDR529C	-48	3	0.15421	0.14331	-33	-14	0.12669	0.02586	-41	-19	0.04103	0.05561	4	-4	0.79772	0.35254	11	21	0.74743	0.48812
YDR530C	-31	12	0.35903	0.24658	14	52	0.84663	0.75293	0	16	0.87166	0.62502	11	-3	0.87343	0.37245	1	36	0.48401	0.78237
YDR530C	5	49	0.765	0.65289	-11	16	0.51954	0.29972	9	27	0.94118	0.80009	-9	12	0.5623	0.63099	23	32	0.90614	0.71865
YDR531W	-100	55	0.02134	0.69982	-10	54	0.53977	0.76983	-13	17	0.59995	0.64246	-23	2	0.26326	0.46404	-2	29	0.39175	0.66693
YDR531W	-88	76	0.03224	0.8273	-5	82	0.63014	0.9048	-38	9	0.06063	0.47754	-13	8	0.47831	0.56943	8	30	0.68029	0.6852
YDR532C	-35	43	0.29925	0.59988	-1	45	0.69314	0.68705	-13	14	0.59995	0.58297	-21	14	0.30065	0.66586	12	28	0.76729	0.64501
YDR532C	-33	19	0.33	0.33803	-3	27	0.66383	0.46481	10	11	0.94586	0.5188	7	17	0.83396	0.71085	-5	29	0.29824	0.66693
YDR533C	-72	22	0.05266	0.37555	14	75	0.84663	0.87928	-9	36	0.71153	0.88226	-36	-5	0.08767	0.33517	4	23	0.57033	0.53562
YDR533C	-82	21	0.03843	0.36247	19	113	0.87226	0.96229	-20	35	0.37679	0.87565	-14	36	0.45575	0.88654	1	24	0.48401	0.55811
YDR535C	-37	12	0.27148	0.24658	-19	28	0.35709	0.48103	-11	-4	0.65819	0.21461	-7	-5	0.60326	0.33517	-2	26	0.39175	0.60687
YDR535C	-39	22	0.24555	0.37555	-9	-4	0.5607	0.07346	-19	1	0.40722	0.30396	-12	-7	0.50017	0.2995	-4	4	0.32701	0.13553
YDR537C	-39	61	0.24555	0.74216	-87	3	0.00379	0.12979	-16	-13	0.50341	0.10109	-5	-1	0.64549	0.40789	-3	25	0.35795	0.58346
YDR537C	-73	-4	0.05106	0.07596	-68	17	0.0077	0.31352	-33	2	0.1069	0.32562	-12	-13	0.50017	0.20642	12	68	0.76729	0.96985
YDR538W	1001	102	0.97762	0.91669	379	23	0.97838	0.40388	180	25	0.98848	0.77672	2658	446	0.99666	0.99229	1833	212	0.99634	0.99132
YDR538W	895	82	0.97659	0.85415	469	82	0.98068	0.9048	149	24	0.98734	0.76179	2764	480	0.99689	0.99252	1426	144	0.996	0.9896
YDR539W	-92	-15	0.02753	0.01721	1	73	0.72441	0.87249	-17	6	0.47059	0.416	-7	51	0.60326	0.93395	6	29	0.62811	0.66693
YDR539W	-104	12	0.01824	0.24658	11	70	0.82674	0.86088	-20	-6	0.37679	0.18589	-12	2	0.50017	0.46404	14	22	0.80269	0.51301
YDR540C	-193	17	0.00011	0.30866	-142	64	0.00126	0.83157	-38	20	0.06063	0.69591	-30	-16	0.15671	0.16741	-27	23	0.01575	0.53562
YDR540C	-96	17	0.02467	0.30866	15	51	0.85341	0.74384	-54	26	0.00809	0.78926	5	-25	0.81003	0.07513	-2	19	0.39175	0.44062
YDR541C	-92	25	0.02753	0.41296	12	85	0.83329	0.91354	-14	11	0.5661	0.5188	-10	-12	0.54286	0.21988	1	21	0.48401	0.48812
YDR541C	-94	19	0.02616	0.33803	7	77	0.79294	0.88813	-27	6	0.20344	0.416	-1	23	0.71855	0.78771	-16	13	0.07456	0.29801
YDR543C	-4	75	0.6942	0.82099	-12	25	0.49701	0.43504	-17	10	0.47059	0.49794	-46	-9	0.02715	0.26659	-5	12	0.29824	0.27574
YDR543C	3	67	0.74985	0.779	-13	1	0.47516	0.1122	-17	-8	0.47059	0.15614	-22	13	0.28155	0.65044	9	10	0.70404	0.23544
YEL003W	-30	17	0.37314	0.30866	-11	51	0.51954	0.74384	-23	1	0.29348	0.30396	9	34	0.8549	0.87504	-12	9	0.12765	0.21705
YEL003W	-28	15	0.4008	0.28605	-6	69	0.61335	0.8572	-38	33	0.06063	0.86015	10	16	0.8656	0.69681	n	n	n	n
YEL005C	-60	13	0.08422	0.26047	-27	-14	0.20406	0.02586	-10	3	0.68429	0.34488	-54	9	0.01116	0.58646	-16	-17	0.07456	0.01039
YEL005C	-29	29	0.38726	0.46058	-31	26	0.1483	0.44918	-14	-3	0.5661	0.23022	-61	13	0.00529	0.65044	-11	15	0.14786	0.3422
YEL006W	249	27	0.9588	0.4366	42	42	0.93021	0.65957	-2	9	0.84921	0.47754	-15	-23	0.43217	0.0925	-3	22	0.35795	0.51301
YEL006W	226	49	0.95754	0.65289	51	21	0.93814	0.371	-17	21	0.47059	0.71176	-3	-28	0.683	0.05787	0	38	0.45375	0.80965
YEL008W	-61	-3	0.08055	0.08353	-28	35	0.18889	0.57323	-42	-2	0.03544	0.24549	-13	23	0.47831	0.78771	-7	5	0.24195	0.14912
YEL008W	-61	-4	0.08055	0.07596	-46	19	0.04127	0.34053	-34	-12	0.09528	0.11032	-26	-25	0.21401	0.07513	6	12	0.62811	0.27574
YEL009C	-16	30	0.5596	0.47114	-1	52	0.69314	0.75293	-24	-6	0.26817	0.18589	-11	34	0.52376	0.87504	-8	37	0.2174	0.79812
YEL009C	-28	24	0.4008	0.40137	-14	42	0.45504	0.65957	-19	3	0.40722	0.34488	-12	-19	0.50017	0.12748	-2	24	0.39175	0.55811
YEL011W	-41	13	0.22352	0.26047	-4	54	0.64842	0.76983	-20	-3	0.37679	0.23022	-4	-8	0.6677	0.28374	-2	6	0.39175	0.16499
YEL011W	-32	-5	0.34411	0.06804	10	90	0.81984	0.92756	-25	18	0.24515	0.66115	-26	-16	0.21401	0.16741	-7	5	0.24195	0.14912
YEL012W	-47	38	0.16201	0.55261	-20	-1	0.33536	0.09484	-33	-12	0.1069	0.11032	-17	3	0.38626	0.48256	-13	16	0.11224	0.368
YEL012W	-31	39	0.35903	0.56087	-39	6	0.0753	0.16429	-55	-28	0.00729	0.02062	-6	-33	0.62581	0.03543	-1	13	0.42543	0.29801
YEL013W	-50	16	0.13952	0.2981	-7	18	0.59611	0.32754	-31	11	0.1338	0.5188	-18	17	0.3652	0.71085	36	40	0.96072	0.83295
YEL013W	-47	-6	0.16201	0.05874	-38	9	0.08208	0.20085	-24	0	0.26817	0.28447	13	15	0.88931	0.68012	62	75	0.98344	0.97545
YEL015W	-28	33	0.4008	0.50327	-23	40	0.27891	0.63612	-21	20	0.34864	0.69591	-31	-25	0.14359	0.07513	6	17	0.62811	0.39301
YEL015W	-16	62	0.5596	0.74813	-2	57	0.67808	0.78972	-9	8	0.71153	0.45965	-21	-25	0.30065	0.07513	4	35	0.57033	0.76729
YEL016C	-28	17	0.4008	0.30866	-6	47	0.61335	0.70452	-16	29	0.50341	0.82288	-41	-18	0.04982	0.14129	-3	22	0.35795	0.51301
YEL016C	-45	26	0.18255	0.42558	-19	27	0.35709	0.46481	-21	10	0.34864	0.49794	-35	-7	0.09676	0.2995	7	27	0.65528	0.62537
YEL017C-A	-44	7	0.19196	0.18829	-36	4	0.09795	0.13968	-20	-21	0.37679	0.04638	-34	32	0.10723	0.86181	-11	17	0.14786	0.39301
YEL017C-A	-38	23	0.25943	0.38772	-25	13	0.24005	0.255	-18	-17	0.43879	0.06918	-26	-27	0.21401	0.06316	19	25	0.87303	0.58346
YEL017W	-21	43	0.49512	0.59988	69	153	0.9509	0.98424	-8	30	0.73729	0.83485	64	208	0.98297	0.98837	67	64	0.98469	0.96346
YEL017W	-18	49	0.5331	0.65289	-9	63	0.5607	0.82593	-2	8	0.84921	0.45965	29	206	0.95777	0.98814	28	42	0.93514	0.85476
YEL018W	-60	-8	0.08422	0.0452	-88	14	0.00367	0.26983	-15	-24	0.53624	0.03202	19	30	0.92831	0.84915	21	23	0.89198	0.53562
YEL018W	-34	15	0.31589	0.28605	-68	7	0.0077	0.17613	-18	-10	0.43879	0.13289	15	-4	0.90657	0.35254	13	26	0.78625	0.60687
YEL019C	-21	30	0.49512	0.47114	3	62	0.74879	0.82087	-31	10	0.1338	0.49794	-32	24	0.13128	0.79726	-4	24	0.32701	0.55811
YEL019C	-28	33	0.4008	0.50327	-3	68	0.66383	0.85191	-17	6	0.47059	0.416	-42	30	0.0436	0.84915	5	20	0.60059	0.46688
YEL025C	-37	27	0.27148	0.4366	-7	16	0.59611	0.29972	-27	-2	0.20344	0.24549	-6	10	0.62581	0.60142	12	26	0.76729	0.60687
YEL025C	-34	29	0.31589	0.46058	-13	27	0.47516	0.46481	-27	11	0.20344	0.5188	-44	6	0.0352	0.53549	-5	26	0.29824	0.60687
YEL026W	-45	18	0.18255	0.32426	0	71	0.70935	0.86548	5	41	0.91907	0.90984	15	31	0.90657	0.85594	-20	2	0.04179	0.10812
YEL026W	-38	25	0.25943	0.41296	18	146	0.8679	0.98217	-1	63	0.86152	0.96717	5	35	0.81003	0.88068	31	5	0.94599	0.14912
YEL028W	-16	74	0.5596	0.81594	-23	10	0.27891	0.21338	-20	16	0.37679	0.62502	45	49	0.97537	0.92969	1	20	0.48401	0.46688
YEL028W	-31	36	0.35903	0.5331	-41	-3	0.06426	0.08093	-17	17	0.47059	0.64246	18	34	0.92336	0.87504	5	23	0.60059	0.53562
YEL029C	-16	48	0.5596	0.64566	-22	50	0.29799	0.73419	5	45	0.91907	0.9291	11	67	0.87343	0.95857	19	49	0.87303	0.91208
YEL029C	-15	29	0.57292	0.46058	-38	34	0.08208	0.56173	1	27	0.88203	0.80009	-4	60	0.6677	0.95132	50	69	0.97819	0.97099
YEL030W	-12	32	0.60917	0.4942	-11	4	0.51954	0.13968	-15	7	0.53624	0.4372	-18	7	0.3652	0.55091	-6	-4	0.26775	0.05263
YEL030W	-20	30	0.50877	0.47114	-14	20	0.45504	0.35559	-9	23	0.71153	0.74675	-36	-4	0.08767	0.35254	5	13	0.60059	0.29801
YEL032W	-36	26	0.28537	0.42558	-27	20	0.20406	0.35559	-32	10	0.12149	0.49794	-22	-17	0.28155	0.15406	-1	17	0.42543	0.39301
YEL032W	-65	39	0.06873	0.56087	10	27	0.81984	0.46481	-6	18	0.78185	0.66115	-2	-57	0.70014	0.00218	4	25	0.57033	0.58346
YEL033W	-18	26	0.5331	0.42558	-30	35	0.16153	0.57323	1	57	0.88203	0.95953	-4	1	0.6677	0.44379	19	44	0.87303	0.87588
YEL033W	-27	53	0.41422	0.68514	-31	30	0.1483	0.50862	-5	3	0.80282	0.34488	-2	-12	0.70014	0.21988	13	37	0.78625	0.79812
YEL034W	-29	34	0.38726	0.51222	-37	22	0.09048	0.38698	-15	80	0.53624	0.97891	3	-6	0.78414	0.31722	26	58	0.92646	0.95078
YEL034W	-12	48	0.60917	0.64566	-35	15	0.106	0.28466	-28	3	0.1852	0.34488	22	21	0.94016	0.76182	61	58	0.9831	0.95078
YEL035C	-47	45	0.16201	0.61767	-26	-1	0.22372	0.09484	-21	6	0.34864	0.416	-17	14	0.38626	0.66586	19	43	0.87303	0.86526
YEL035C	-43	37	0.20218	0.54297	-12	17	0.49701	0.31352	-23	13	0.29348	0.56371	16	16	0.9137	0.69681	35	41	0.9582	0.84391
YEL036C	45	130	0.90246	0.95742	-14	33	0.45504	0.54828	-29	0	0.16822	0.28447	-6	-10	0.62581	0.2491	-11	18	0.14786	0.41584
YEL036C	-12	51	0.60917	0.66873	-42	7	0.06058	0.17613	-20	-13	0.37679	0.10109	-21	10	0.30065	0.60142	0	25	0.45375	0.58346
YEL037C	-14	46	0.58531	0.62685	-15	51	0.43573	0.74384	-11	42	0.65819	0.91565	12	-8	0.88137	0.28374	10	42	0.72539	0.85476
YEL037C	-38	39	0.25943	0.56087	-28	38	0.18889	0.61243	-27	21	0.20344	0.71176	33	9	0.9641	0.58646	30	46	0.94176	0.89129
YEL038W	-33	47	0.33	0.63614	-20	21	0.33536	0.371	-18	18	0.43879	0.66115	-4	6	0.6677	0.53549	34	57	0.95569	0.94747
YEL038W	-26	27	0.42845	0.4366	-2	55	0.67808	0.77696	-13	4	0.59995	0.36893	-5	-16	0.64549	0.16741	16	55	0.8334	0.94096
YEL039C	19	137	0.84337	0.96385	0	53	0.70935	0.76086	-3	46	0.83462	0.93332	-4	-5	0.6677	0.33517	27	49	0.93217	0.91208
YEL039C	14	134	0.82226	0.96121	-14	85	0.45504	0.91354	-27	50	0.20344	0.94597	-4	17	0.6677	0.71085	35	61	0.9582	0.95798
YEL042W	-32	10	0.34411	0.2226	-19	6	0.35709	0.16429	-15	8	0.53624	0.45965	-34	18	0.10723	0.72477	-28	-9	0.01381	0.02911
YEL042W	-16	20	0.5596	0.34893	-22	8	0.29799	0.18808	-3	-6	0.83462	0.18589	-24	20	0.24657	0.74962	-11	16	0.14786	0.368
YEL043W	-81	-10	0.03947	0.03465	-3	69	0.66383	0.8572	-18	-14	0.43879	0.09402	-8	34	0.58405	0.87504	9	25	0.70404	0.58346
YEL043W	-43	23	0.20218	0.38772	36	67	0.92182	0.8464	-18	-13	0.43879	0.10109	-14	-20	0.45575	0.11839	-4	19	0.32701	0.44062
YEL047C	-26	64	0.42845	0.76179	-50	55	0.02736	0.77696	-14	1	0.5661	0.30396	-12	8	0.50017	0.56943	8	36	0.68029	0.78237
YEL047C	0	104	0.72851	0.92197	-29	23	0.17475	0.40388	-21	22	0.34864	0.72965	0	13	0.73443	0.65044	7	41	0.65528	0.84391
YEL048C	-15	56	0.57292	0.70808	78	190	0.95481	0.98999	-20	23	0.37679	0.74675	10	17	0.8656	0.71085	33	62	0.95272	0.9598
YEL048C	-9	58	0.6436	0.72128	2	47	0.73925	0.70452	-21	-7	0.34864	0.16981	-14	55	0.45575	0.94223	3	41	0.54224	0.84391
YEL049W	-6	53	0.67527	0.68514	9	72	0.81248	0.86962	-11	3	0.65819	0.34488	-24	-18	0.24657	0.14129	23	38	0.90614	0.80965
YEL049W	11	133	0.80631	0.96029	-20	19	0.33536	0.34053	-13	17	0.59995	0.64246	-34	1	0.10723	0.44379	1	26	0.48401	0.60687
YEL050C	-13	76	0.5969	0.8273	-22	47	0.29799	0.70452	-36	8	0.07658	0.45965	-1	-8	0.71855	0.28374	3	29	0.54224	0.66693
YEL050C	15	101	0.82788	0.9144	-8	33	0.57852	0.54828	-46	-3	0.02154	0.23022	26	-13	0.9504	0.20642	12	38	0.76729	0.80965
YEL053C	29	70	0.87022	0.79483	21	78	0.881	0.89215	-14	3	0.5661	0.34488	-16	44	0.40835	0.91934	6	17	0.62811	0.39301
YEL053C	14	71	0.82226	0.8016	-13	3	0.47516	0.12979	-9	22	0.71153	0.72965	-19	33	0.34115	0.86848	10	25	0.72539	0.58346
YEL054C	-10	54	0.63293	0.69213	-17	23	0.39526	0.40388	-14	-21	0.5661	0.04638	-49	-10	0.02002	0.2491	4	22	0.57033	0.51301
YEL054C	-17	37	0.54652	0.54297	-7	21	0.59611	0.371	-28	-21	0.1852	0.04638	-17	14	0.38626	0.66586	8	16	0.68029	0.368
YEL056W	-51	59	0.13333	0.72782	-40	43	0.06932	0.67038	-20	25	0.37679	0.77672	-17	25	0.38626	0.8075	9	12	0.70404	0.27574
YEL056W	-34	105	0.31589	0.92449	-14	56	0.45504	0.78351	-8	29	0.73729	0.82288	-20	8	0.32067	0.56943	12	24	0.76729	0.55811
YEL057C	-25	40	0.44211	0.56947	-15	24	0.43573	0.42044	-26	6	0.22361	0.416	8	7	0.84501	0.55091	17	65	0.84813	0.96563
YEL057C	-2	71	0.71244	0.8016	-20	5	0.33536	0.15118	-10	42	0.68429	0.91565	-18	13	0.3652	0.65044	11	42	0.74743	0.85476
YEL059C-A	-35	35	0.29925	0.52208	4	62	0.76178	0.82087	-35	-12	0.08513	0.11032	-30	0	0.15671	0.42722	-16	2	0.07456	0.10812
YEL059C-A	-26	14	0.42845	0.27366	-19	11	0.35709	0.22545	-13	-10	0.59995	0.13289	-23	-11	0.26326	0.23392	7	16	0.65528	0.368
YEL060C	-12	89	0.60917	0.87837	-16	40	0.41515	0.63612	-34	0	0.09528	0.28447	-8	0	0.58405	0.42722	15	47	0.81947	0.89883
YEL060C	-25	98	0.44211	0.90567	-6	88	0.61335	0.92239	-19	-8	0.40722	0.15614	-9	-4	0.5623	0.35254	20	45	0.88422	0.88513
YEL062W	58	81	0.91784	0.85094	-18	26	0.37744	0.44918	-22	51	0.31878	0.94814	-12	2	0.50017	0.46404	9	41	0.70404	0.84391
YEL062W	55	100	0.91462	0.91187	-5	27	0.63014	0.46481	-29	11	0.16822	0.5188	14	4	0.89828	0.50132	9	33	0.70404	0.73361
YEL064C	33	85	0.88112	0.86494	-12	12	0.49701	0.24085	-11	23	0.65819	0.74675	-11	-38	0.52376	0.02048	5	24	0.60059	0.55811
YEL064C	32	102	0.8786	0.91669	4	15	0.76178	0.28466	-23	-7	0.29348	0.16981	-5	-10	0.64549	0.2491	6	34	0.62811	0.75176
YEL065W	34	-9	0.8833	0.03947	-3	9	0.66383	0.20085	0	-4	0.87166	0.21461	-23	17	0.26326	0.71085	-19	7	0.04909	0.18291
YEL065W	31	-19	0.87584	0.00952	-15	9	0.43573	0.20085	-34	1	0.09528	0.30396	-37	-2	0.07973	0.38948	-9	9	0.19079	0.21705
YEL066W	-5	75	0.6841	0.82099	-9	38	0.5607	0.61243	-12	19	0.63095	0.67836	-21	-34	0.30065	0.03095	-6	51	0.26775	0.92498
YEL066W	27	108	0.86586	0.9292	9	70	0.81248	0.86088	-12	53	0.63095	0.95258	-24	-6	0.24657	0.31722	30	22	0.94176	0.51301
YEL067C	24	84	0.85702	0.86219	-1	36	0.69314	0.58553	-15	3	0.53624	0.34488	1	-2	0.75135	0.38948	-22	25	0.03082	0.58346
YEL067C	9	76	0.79414	0.8273	-14	8	0.45504	0.18808	-26	1	0.22361	0.30396	0	-19	0.73443	0.12748	2	23	0.51427	0.53562
YEL071W	-22	60	0.4825	0.73585	-9	67	0.5607	0.8464	-12	21	0.63095	0.71176	5	18	0.81003	0.72477	2	26	0.51427	0.60687
YEL071W	-48	25	0.15421	0.41296	-12	45	0.49701	0.68705	-2	6	0.84921	0.416	-17	-11	0.38626	0.23392	3	36	0.54224	0.78237
YEL072W	0	42	0.72851	0.58875	-23	30	0.27891	0.50862	-16	27	0.50341	0.80009	-20	-11	0.32067	0.23392	-4	20	0.32701	0.46688
YEL072W	10	35	0.80045	0.52208	-17	45	0.39526	0.68705	1	44	0.88203	0.92432	-16	-17	0.40835	0.15406	5	31	0.60059	0.70221
YEL073C	-50	34	0.13952	0.51222	-9	26	0.5607	0.44918	-24	12	0.26817	0.54125	-29	-4	0.17167	0.35254	15	32	0.81947	0.71865
YEL073C	-63	33	0.07423	0.50327	-25	39	0.24005	0.62451	-22	8	0.31878	0.45965	-48	4	0.02289	0.50132	14	33	0.80269	0.73361
YEL074W	-7	103	0.66494	0.91956	-2	87	0.67808	0.9194	-19	19	0.40722	0.67836	-28	-39	0.18616	0.01875	-4	42	0.32701	0.85476
YEL074W	-28	27	0.4008	0.4366	-14	53	0.45504	0.76086	-11	4	0.65819	0.36893	2	-28	0.76734	0.05787	-1	15	0.42543	0.3422
YEL076C	-31	31	0.35903	0.48215	-18	17	0.37744	0.31352	-15	1	0.53624	0.30396	-30	-42	0.15671	0.01254	1	26	0.48401	0.60687
YEL076C	-25	23	0.44211	0.38772	-46	19	0.04127	0.34053	-18	8	0.43879	0.45965	-24	-5	0.24657	0.33517	-7	10	0.24195	0.23544
YEL076W-C	-54	19	0.11405	0.33803	-34	6	0.11738	0.16429	-18	-9	0.43879	0.14315	-11	-48	0.52376	0.00655	2	9	0.51427	0.21705
YEL076W-C	-71	29	0.05473	0.46058	-18	27	0.37744	0.46481	-31	-17	0.1338	0.06918	-9	-12	0.5623	0.21988	1	7	0.48401	0.18291
YER001W	-43	-4	0.20218	0.07596	-38	8	0.08208	0.18808	-27	-5	0.20344	0.2007	-37	-22	0.07973	0.1009	-18	5	0.05549	0.14912
YER001W	-35	-5	0.29925	0.06804	-32	5	0.136	0.15118	-32	6	0.12149	0.416	-39	-14	0.06385	0.19295	0	30	0.45375	0.6852
YER002W	-60	8	0.08422	0.19988	-24	49	0.26109	0.72579	-32	-14	0.12149	0.09402	-19	24	0.34115	0.79726	3	18	0.54224	0.41584
YER002W	-62	21	0.07768	0.36247	22	89	0.88491	0.92527	-19	-13	0.40722	0.10109	-45	16	0.03164	0.69681	11	23	0.74743	0.53562
YER003C	-72	8	0.05266	0.19988	21	101	0.881	0.9478	-22	20	0.31878	0.69591	-25	-30	0.22989	0.0489	38	725	0.96437	0.99497
YER003C	-14	47	0.58531	0.63614	-6	24	0.61335	0.42044	-28	2	0.1852	0.32562	-2	24	0.70014	0.79726	30	321	0.94176	0.99303
YER004W	-26	17	0.42845	0.30866	-14	46	0.45504	0.69544	-23	16	0.29348	0.62502	-38	24	0.07191	0.79726	1	42	0.48401	0.85476
YER004W	-33	12	0.33	0.24658	30	50	0.90653	0.73419	-11	-3	0.65819	0.23022	11	34	0.87343	0.87504	3	35	0.54224	0.76729
YER005W	-16	92	0.5596	0.88743	-32	16	0.136	0.29972	-10	-1	0.68429	0.26339	-28	-2	0.18616	0.38948	-13	0	0.11224	0.08495
YER005W	-24	47	0.45496	0.63614	14	90	0.84663	0.92756	-18	-7	0.43879	0.16981	-23	-22	0.26326	0.1009	0	31	0.45375	0.70221
YER006W	-44	14	0.19196	0.27366	-8	52	0.57852	0.75293	-18	9	0.43879	0.47754	-9	13	0.5623	0.65044	1	24	0.48401	0.55811
YER006W	-37	20	0.27148	0.34893	-13	39	0.47516	0.62451	-25	16	0.24515	0.62502	-27	-6	0.19951	0.31722	0	21	0.45375	0.48812
YER007C-A	17	1885	0.83786	0.99644	85	179	0.95734	0.98873	-39	77	0.05288	0.97788	-16	-17	0.40835	0.15406	15	18	0.81947	0.41584
YER007C-A	-39	3	0.24555	0.14331	-8	45	0.57852	0.68705	-7	3	0.76065	0.34488	7	67	0.83396	0.95857	3	0	0.54224	0.08495
YER009W	-42	17	0.21308	0.30866	-8	78	0.57852	0.89215	-8	12	0.73729	0.54125	-5	-4	0.64549	0.35254	19	31	0.87303	0.70221
YER009W	-40	28	0.23511	0.44899	5	87	0.77316	0.9194	-12	19	0.63095	0.67836	-5	-18	0.64549	0.14129	5	19	0.60059	0.44062
YER011W	-71	17	0.05473	0.30866	-27	6	0.20406	0.16429	-32	-12	0.12149	0.11032	-20	-33	0.32067	0.03543	-13	-2	0.11224	0.06736
YER011W	-68	1	0.06081	0.12002	-32	16	0.136	0.29972	-29	-10	0.16822	0.13289	-27	-18	0.19951	0.14129	-17	3	0.06474	0.1208
YER012W	-34	13	0.31589	0.26047	-8	-9	0.57852	0.04414	-8	13	0.73729	0.56371	-5	31	0.64549	0.85594	2	32	0.51427	0.71865
YER012W	-29	10	0.38726	0.2226	-13	-1	0.47516	0.09484	-8	10	0.73729	0.49794	-16	-2	0.40835	0.38948	30	33	0.94176	0.73361
YER013W	3	23	0.74985	0.38772	-9	23	0.5607	0.40388	-9	5	0.71153	0.39012	16	18	0.9137	0.72477	6	41	0.62811	0.84391
YER013W	-4	24	0.6942	0.40137	-27	30	0.20406	0.50862	-18	1	0.43879	0.30396	-9	38	0.5623	0.89471	1	26	0.48401	0.60687
YER014W	-3	68	0.70361	0.7845	-21	11	0.31708	0.22545	-10	48	0.68429	0.94141	n	n	n	n	-2	36	0.39175	0.78237
YER014W	-19	17	0.52117	0.30866	-23	-10	0.27891	0.03839	-6	55	0.78185	0.95634	n	n	n	n	-10	18	0.17001	0.41584
YER017C	-51	-2	0.13333	0.09213	-24	7	0.26109	0.17613	-11	4	0.65819	0.36893	-18	-5	0.3652	0.33517	-11	10	0.14786	0.23544
YER017C	-51	5	0.13333	0.16442	-21	0	0.31708	0.10312	-21	1	0.34864	0.30396	1	-18	0.75135	0.14129	-16	-11	0.07456	0.02249
YER018C	-17	-5	0.54652	0.06804	20	92	0.87617	0.93182	-26	8	0.22361	0.45965	-7	7	0.60326	0.55091	-6	6	0.26775	0.16499
YER018C	-13	18	0.5969	0.32426	13	84	0.84088	0.91043	-23	12	0.29348	0.54125	-9	13	0.5623	0.65044	-5	35	0.29824	0.76729
YER019C-A	-16	1	0.5596	0.12002	-8	59	0.57852	0.80363	3	85	0.90289	0.98108	-28	-24	0.18616	0.0841	18	27	0.86138	0.62537
YER019C-A	-44	2	0.19196	0.13115	6	68	0.7827	0.85191	4	41	0.91201	0.90984	12	9	0.88137	0.58646	7	107	0.65528	0.98778
YER019W	-39	12	0.24555	0.24658	5	61	0.77316	0.81558	-19	16	0.40722	0.62502	-7	4	0.60326	0.50132	11	36	0.74743	0.78237
YER019W	-29	20	0.38726	0.34893	18	83	0.8679	0.90779	-22	4	0.31878	0.36893	-34	45	0.10723	0.92164	-9	20	0.19079	0.46688
YER020W	-1	33	0.72105	0.50327	-31	36	0.1483	0.58553	-30	6	0.15272	0.416	-28	18	0.18616	0.72477	4	19	0.57033	0.44062
YER020W	-16	31	0.5596	0.48215	-23	40	0.27891	0.63612	-21	24	0.34864	0.76179	-24	-15	0.24657	0.17869	-5	12	0.29824	0.27574
YER022W	-48	-3	0.15421	0.08353	-24	14	0.26109	0.26983	-7	7	0.76065	0.4372	2	15	0.76734	0.68012	1	8	0.48401	0.19981
YER022W	-19	6	0.52117	0.17636	-39	19	0.0753	0.34053	-17	10	0.47059	0.49794	-37	-10	0.07973	0.2491	-8	11	0.2174	0.2569
YER023W	-21	7	0.49512	0.18829	3	62	0.74879	0.82087	-5	13	0.80282	0.56371	-40	38	0.0558	0.89471	-4	33	0.32701	0.73361
YER023W	-34	16	0.31589	0.2981	8	74	0.80351	0.87594	-6	27	0.78185	0.80009	-37	12	0.07973	0.63099	9	5	0.70404	0.14912
YER024W	-84	50	0.0366	0.66069	-12	28	0.49701	0.48103	-23	-6	0.29348	0.18589	-17	10	0.38626	0.60142	-10	3	0.17001	0.1208
YER024W	-96	29	0.02467	0.46058	-8	37	0.57852	0.59933	-19	-12	0.40722	0.11032	14	-19	0.89828	0.12748	-23	9	0.02626	0.21705
YER027C	-33	21	0.33	0.36247	-31	31	0.1483	0.52379	-32	4	0.12149	0.36893	-5	-9	0.64549	0.26659	12	37	0.76729	0.79812
YER027C	-46	7	0.17223	0.18829	-18	32	0.37744	0.53541	-13	12	0.59995	0.54125	-43	-11	0.03981	0.23392	0	28	0.45375	0.64501
YER029C	-59	6	0.08915	0.17636	-27	17	0.20406	0.31352	-9	0	0.71153	0.28447	-20	5	0.32067	0.51846	30	29	0.94176	0.66693
YER029C	-49	7	0.14733	0.18829	-40	27	0.06932	0.46481	-12	-7	0.63095	0.16981	-16	19	0.40835	0.73858	25	35	0.9203	0.76729
YER031C	12	13	0.81273	0.26047	9	2	0.81248	0.12002	-5	-24	0.80282	0.03202	9	21	0.8549	0.76182	18	40	0.86138	0.83295
YER031C	-10	-4	0.63293	0.07596	3	0	0.74879	0.10312	10	0	0.94586	0.28447	23	33	0.94281	0.86848	29	67	0.93845	0.96837
YER033C	-60	-11	0.08422	0.02925	-5	38	0.63014	0.61243	-23	-21	0.29348	0.04638	4	-10	0.79772	0.2491	-5	19	0.29824	0.44062
YER033C	-84	-21	0.0366	0.00665	-15	41	0.43573	0.6483	-32	-26	0.12149	0.02666	-23	5	0.26326	0.51846	-9	12	0.19079	0.27574
YER034W	-51	34	0.13333	0.51222	-24	28	0.26109	0.48103	-21	25	0.34864	0.77672	-34	-4	0.10723	0.35254	15	49	0.81947	0.91208
YER034W	-14	76	0.58531	0.8273	-35	17	0.106	0.31352	-21	8	0.34864	0.45965	-19	-17	0.34115	0.15406	8	43	0.68029	0.86526
YER035W	-45	-4	0.18255	0.07596	-13	21	0.47516	0.371	-13	9	0.59995	0.47754	0	-7	0.73443	0.2995	-9	21	0.19079	0.48812
YER035W	-25	21	0.44211	0.36247	-28	8	0.18889	0.18808	-21	2	0.34864	0.32562	-25	-7	0.22989	0.2995	1	11	0.48401	0.2569
YER036C	-2	74	0.71244	0.81594	-21	45	0.31708	0.68705	1	37	0.88203	0.88716	-21	6	0.30065	0.53549	0	16	0.45375	0.368
YER036C	15	106	0.82788	0.92633	-17	51	0.39526	0.74384	-10	42	0.68429	0.91565	-18	-11	0.3652	0.23392	-5	19	0.29824	0.44062
YER037W	-12	-7	0.60917	0.05197	0	13	0.70935	0.255	-3	4	0.83462	0.36893	-35	24	0.09676	0.79726	17	42	0.84813	0.85476
YER037W	6	9	0.77349	0.21113	17	6	0.86261	0.16429	-3	-29	0.83462	0.01766	14	17	0.89828	0.71085	42	37	0.97099	0.79812
YER039C	4	-2	0.75857	0.09213	15	-2	0.85341	0.08714	6	-14	0.92523	0.09402	-6	1	0.62581	0.44379	19	50	0.87303	0.91813
YER039C	9	13	0.79414	0.26047	13	17	0.84088	0.31352	-7	6	0.76065	0.416	3	-13	0.78414	0.20642	46	92	0.97488	0.98447
YER042W	-42	17	0.21308	0.30866	-32	41	0.136	0.6483	-15	44	0.53624	0.92432	9	36	0.8549	0.88654	5	53	0.60059	0.93286
YER042W	-37	17	0.27148	0.30866	-31	10	0.1483	0.21338	-9	37	0.71153	0.88716	-14	18	0.45575	0.72477	34	46	0.95569	0.89129
YER047C	-30	46	0.37314	0.62685	31	88	0.90871	0.92239	-16	1	0.50341	0.30396	-15	17	0.43217	0.71085	4	27	0.57033	0.62537
YER047C	-13	32	0.5969	0.4942	-25	25	0.24005	0.43504	-17	38	0.47059	0.89343	-12	-4	0.50017	0.35254	1	25	0.48401	0.58346
YER048C	-23	49	0.46815	0.65289	-35	14	0.106	0.26983	-32	-17	0.12149	0.06918	-23	-33	0.26326	0.03543	0	55	0.45375	0.94096
YER048C	-37	54	0.27148	0.69213	-58	15	0.01437	0.28466	-15	-5	0.53624	0.2007	-28	-32	0.18616	0.03935	16	54	0.8334	0.93697
YER048W-A	-23	7	0.46815	0.18829	-21	20	0.31708	0.35559	-18	11	0.43879	0.5188	-17	-5	0.38626	0.33517	17	28	0.84813	0.64501
YER048W-A	-18	5	0.5331	0.16442	-27	8	0.20406	0.18808	-20	13	0.37679	0.56371	-3	0	0.683	0.42722	6	42	0.62811	0.85476
YER050C	-2	59	0.71244	0.72782	-15	16	0.43573	0.29972	-39	0	0.05288	0.28447	-19	-14	0.34115	0.19295	9	48	0.70404	0.905
YER050C	-13	74	0.5969	0.81594	-30	39	0.16153	0.62451	-25	-4	0.24515	0.21461	-40	-25	0.0558	0.07513	13	58	0.78625	0.95078
YER054C	-33	14	0.33	0.27366	-23	28	0.27891	0.48103	-17	28	0.47059	0.81399	-23	-14	0.26326	0.19295	9	56	0.70404	0.94427
YER054C	-46	23	0.17223	0.38772	-10	10	0.53977	0.21338	-25	26	0.24515	0.78926	23	41	0.94281	0.90829	4	33	0.57033	0.73361
YER056C-A	7	70	0.78164	0.79483	-11	18	0.51954	0.32754	-18	20	0.43879	0.69591	9	24	0.8549	0.79726	14	31	0.80269	0.70221
YER056C-A	6	58	0.77349	0.72128	5	52	0.77316	0.75293	-4	41	0.81912	0.90984	-17	48	0.38626	0.92739	0	23	0.45375	0.53562
YER057C	-7	59	0.66494	0.72782	-13	32	0.47516	0.53541	-14	47	0.5661	0.93708	-27	1	0.19951	0.44379	11	41	0.74743	0.84391
YER057C	-23	65	0.46815	0.76718	-14	24	0.45504	0.42044	-3	24	0.83462	0.76179	-18	-11	0.3652	0.23392	19	51	0.87303	0.92498
YER058W	13	91	0.81721	0.88399	-1	61	0.69314	0.81558	-22	17	0.31878	0.64246	8	54	0.84501	0.93993	19	24	0.87303	0.55811
YER058W	0	89	0.72851	0.87837	-24	64	0.26109	0.83157	-14	29	0.5661	0.82288	9	24	0.8549	0.79726	7	29	0.65528	0.66693
YER059W	-29	44	0.38726	0.6078	-40	18	0.06932	0.32754	-28	15	0.1852	0.60303	-19	5	0.34115	0.51846	-1	30	0.42543	0.6852
YER059W	-23	33	0.46815	0.50327	-15	47	0.43573	0.70452	-23	24	0.29348	0.76179	-19	-17	0.34115	0.15406	-11	27	0.14786	0.62537
YER060W	-31	60	0.35903	0.73585	-26	10	0.22372	0.21338	-26	-17	0.22361	0.06918	-33	0	0.11954	0.42722	12	55	0.76729	0.94096
YER060W	-22	46	0.4825	0.62685	-47	-5	0.03747	0.06783	-18	8	0.43879	0.45965	-24	14	0.24657	0.66586	1	23	0.48401	0.53562
YER061C	15	76	0.82788	0.8273	-3	28	0.66383	0.48103	-14	14	0.5661	0.58297	-15	2	0.43217	0.46404	12	39	0.76729	0.82153
YER061C	-14	72	0.58531	0.80573	30	86	0.90653	0.91641	-19	11	0.40722	0.5188	-18	-20	0.3652	0.11839	41	58	0.96894	0.95078
YER062C	22	94	0.85117	0.89489	-13	14	0.47516	0.26983	-11	17	0.65819	0.64246	-25	7	0.22989	0.55091	3	31	0.54224	0.70221
YER062C	10	81	0.80045	0.85094	-21	4	0.31708	0.13968	0	19	0.87166	0.67836	-15	41	0.43217	0.90829	-8	24	0.2174	0.55811
YER063W	-11	55	0.62145	0.69982	-6	11	0.61335	0.22545	-4	0	0.81912	0.28447	-47	-47	0.0245	0.00724	3	13	0.54224	0.29801
YER063W	23	98	0.85381	0.90567	-9	10	0.5607	0.21338	-20	5	0.37679	0.39012	-19	37	0.34115	0.89034	-7	4	0.24195	0.13553
YER064C	-28	19	0.4008	0.33803	-24	36	0.26109	0.58553	-15	5	0.53624	0.39012	-13	13	0.47831	0.65044	-3	9	0.35795	0.21705
YER064C	-24	38	0.45496	0.55261	-37	25	0.09048	0.43504	-11	15	0.65819	0.60303	-22	-9	0.28155	0.26659	19	23	0.87303	0.53562
YER066C-A	6	73	0.77349	0.81055	-8	15	0.57852	0.28466	-13	22	0.59995	0.72965	-7	13	0.60326	0.65044	34	62	0.95569	0.9598
YER066C-A	-12	82	0.60917	0.85415	-18	17	0.37744	0.31352	-29	-6	0.16822	0.18589	-1	-50	0.71855	0.00483	35	59	0.9582	0.95387
YER066W	-13	69	0.5969	0.78921	-1	23	0.69314	0.40388	-19	-3	0.40722	0.23022	-28	-14	0.18616	0.19295	22	43	0.89849	0.86526
YER066W	12	108	0.81273	0.9292	-10	31	0.53977	0.52379	-12	-7	0.63095	0.16981	-22	11	0.28155	0.61592	11	35	0.74743	0.76729
YER067W	16	11	0.83281	0.23442	6	19	0.7827	0.34053	4	7	0.91201	0.4372	-24	-16	0.24657	0.16741	30	76	0.94176	0.97682
YER067W	22	4	0.85117	0.15364	9	27	0.81248	0.46481	5	3	0.91907	0.34488	-8	-5	0.58405	0.33517	30	59	0.94176	0.95387
YER070W	0	39	0.72851	0.56087	-36	7	0.09795	0.17613	-13	13	0.59995	0.56371	-5	35	0.64549	0.88068	42	60	0.97099	0.95581
YER070W	-15	19	0.57292	0.33803	-14	21	0.45504	0.371	-10	39	0.68429	0.90027	-8	2	0.58405	0.46404	52	77	0.97967	0.97739
YER071C	-33	27	0.33	0.4366	-17	29	0.39526	0.49494	-27	4	0.20344	0.36893	-5	27	0.64549	0.82533	7	22	0.65528	0.51301
YER071C	-31	48	0.35903	0.64566	26	93	0.8956	0.934	-20	13	0.37679	0.56371	14	4	0.89828	0.50132	20	38	0.88422	0.80965
YER072W	-33	64	0.33	0.76179	-13	30	0.47516	0.50862	-18	11	0.43879	0.5188	-17	-1	0.38626	0.40789	-10	16	0.17001	0.368
YER072W	-12	60	0.60917	0.73585	-32	12	0.136	0.24085	-16	9	0.50341	0.47754	-17	-29	0.38626	0.05315	18	28	0.86138	0.64501
YER073W	6	39	0.77349	0.56087	-11	39	0.51954	0.62451	8	13	0.93628	0.56371	13	3	0.88931	0.48256	-1	10	0.42543	0.23544
YER073W	12	60	0.81273	0.73585	-8	32	0.57852	0.53541	24	31	0.97013	0.84271	-29	-17	0.17167	0.15406	1	11	0.48401	0.2569
YER074W	-48	28	0.15421	0.44899	-38	7	0.08208	0.17613	-35	14	0.08513	0.58297	-52	-42	0.01438	0.01254	2	12	0.51427	0.27574
YER074W	-49	18	0.14733	0.32426	-13	27	0.47516	0.46481	-9	23	0.71153	0.74675	-27	14	0.19951	0.66586	11	28	0.74743	0.64501
YER077C	-1	41	0.72105	0.5798	-13	10	0.47516	0.21338	-26	25	0.22361	0.77672	5	19	0.81003	0.73858	16	39	0.8334	0.82153
YER077C	-11	30	0.62145	0.47114	-10	25	0.53977	0.43504	-15	28	0.53624	0.81399	-30	29	0.15671	0.84029	4	23	0.57033	0.53562
YER079W	-48	27	0.15421	0.4366	-19	37	0.35709	0.59933	-17	16	0.47059	0.62502	-18	15	0.3652	0.68012	9	38	0.70404	0.80965
YER079W	-10	85	0.63293	0.86494	-22	46	0.29799	0.69544	-20	11	0.37679	0.5188	-35	-2	0.09676	0.38948	6	37	0.62811	0.79812
YER080W	-27	13	0.41422	0.26047	1	50	0.72441	0.73419	-6	-5	0.78185	0.2007	-42	-20	0.0436	0.11839	-12	4	0.12765	0.13553
YER080W	-36	3	0.28537	0.14331	7	58	0.79294	0.79673	-23	6	0.29348	0.416	-8	4	0.58405	0.50132	4	-2	0.57033	0.06736
YER082C	50	128	0.90854	0.95559	-5	45	0.63014	0.68705	-19	29	0.40722	0.82288	-24	12	0.24657	0.63099	8	45	0.68029	0.88513
YER082C	58	131	0.91784	0.95834	-30	30	0.16153	0.50862	-21	43	0.34864	0.92056	-40	-2	0.0558	0.38948	7	41	0.65528	0.84391
YER083C	-17	28	0.54652	0.44899	-20	24	0.33536	0.42044	-15	23	0.53624	0.74675	15	-19	0.90657	0.12748	5	26	0.60059	0.60687
YER083C	-13	19	0.5969	0.33803	-25	5	0.24005	0.15118	-16	16	0.50341	0.62502	-8	-16	0.58405	0.16741	0	21	0.45375	0.48812
YER084W	2	9	0.74274	0.21113	-8	-8	0.57852	0.04771	-10	7	0.68429	0.4372	-7	-36	0.60326	0.02542	10	29	0.72539	0.66693
YER084W	7	-8	0.78164	0.0452	-3	-18	0.66383	0.01667	3	-5	0.90289	0.2007	-32	-27	0.13128	0.06316	-2	27	0.39175	0.62537
YER085C	-20	20	0.50877	0.34893	-27	26	0.20406	0.44918	-9	18	0.71153	0.66115	-22	23	0.28155	0.78771	-10	23	0.17001	0.53562
YER085C	-15	29	0.57292	0.46058	-28	15	0.18889	0.28466	-15	10	0.53624	0.49794	-19	-8	0.34115	0.28374	10	32	0.72539	0.71865
YER087C-A	n	n	n	n	n	n	n	n	n	n	n	n	-20	-13	0.32067	0.20642	-9	14	0.19079	0.32187
YER087C-A	140	1731	0.94847	0.99598	2037	116	0.99022	0.9647	n	n	n	n	3	-19	0.78414	0.12748	-1	19	0.42543	0.44062
YER087W	362	86	0.9658	0.86861	345	44	0.97735	0.679	11	27	0.94837	0.80009	-18	7	0.3652	0.55091	-4	11	0.32701	0.2569
YER087W	392	61	0.96695	0.74216	384	61	0.9785	0.81558	5	47	0.91907	0.93708	-35	-16	0.09676	0.16741	4	6	0.57033	0.16499
YER089C	-7	1442	0.66494	0.99518	-44	29	0.05035	0.49494	n	n	n	n	-14	-42	0.45575	0.01254	18	45	0.86138	0.88513
YER089C	-59	6	0.08915	0.17636	-11	27	0.51954	0.46481	10	8	0.94586	0.45965	-32	-23	0.13128	0.0925	0	25	0.45375	0.58346
YER090W	-34	64	0.31589	0.76179	-59	39	0.01322	0.62451	4	36	0.91201	0.88226	1	-5	0.75135	0.33517	-5	16	0.29824	0.368
YER090W	-32	49	0.34411	0.65289	-48	39	0.0338	0.62451	-3	55	0.83462	0.95634	-34	40	0.10723	0.90369	7	16	0.65528	0.368
YER091C	-53	-8	0.12002	0.0452	-4	18	0.64842	0.32754	-15	16	0.53624	0.62502	-13	27	0.47831	0.82533	7	24	0.65528	0.55811
YER091C	-42	1	0.21308	0.12002	-16	28	0.41515	0.48103	-9	7	0.71153	0.4372	-45	-9	0.03164	0.26659	5	28	0.60059	0.64501
YER091C-A	-37	17	0.27148	0.30866	-25	29	0.24005	0.49494	-28	31	0.1852	0.84271	-16	-17	0.40835	0.15406	-2	13	0.39175	0.29801
YER091C-A	-16	27	0.5596	0.4366	-23	27	0.27891	0.46481	-9	8	0.71153	0.45965	-11	3	0.52376	0.48256	6	31	0.62811	0.70221
YER092W	-50	4	0.13952	0.15364	-29	52	0.17475	0.75293	-16	1	0.50341	0.30396	-5	31	0.64549	0.85594	-5	35	0.29824	0.76729
YER092W	-56	-5	0.10338	0.06804	-11	42	0.51954	0.65957	-35	-8	0.08513	0.15614	-2	21	0.70014	0.76182	-3	43	0.35795	0.86526
YER093C-A	-17	22	0.54652	0.37555	-9	22	0.5607	0.38698	-7	21	0.76065	0.71176	-16	5	0.40835	0.51846	-9	19	0.19079	0.44062
YER093C-A	-8	35	0.65393	0.52208	-1	28	0.69314	0.48103	-27	21	0.20344	0.71176	-28	7	0.18616	0.55091	-1	19	0.42543	0.44062
YER094C	n	n	n	n	n	n	n	n	-43	87	0.03054	0.98176	-9	-7	0.5623	0.2995	-4	19	0.32701	0.44062
YER094C	n	n	n	n	n	n	n	n	-26	56	0.22361	0.95794	2	41	0.76734	0.90829	9	42	0.70404	0.85476
YER095W	-11	35	0.62145	0.52208	-9	36	0.5607	0.58553	-18	32	0.43879	0.85343	-19	8	0.34115	0.56943	8	4	0.68029	0.13553
YER095W	-13	36	0.5969	0.5331	-8	32	0.57852	0.53541	-16	14	0.50341	0.58297	-21	33	0.30065	0.86848	3	20	0.54224	0.46688
YER096W	n	n	n	n	n	n	n	n	-18	-23	0.43879	0.03521	-30	2	0.15671	0.46404	5	11	0.60059	0.2569
YER096W	52	-21	0.91233	0.00665	31	96	0.90871	0.94044	-15	13	0.53624	0.56371	-34	-17	0.10723	0.15406	14	28	0.80269	0.64501
YER097W	-36	26	0.28537	0.42558	-5	58	0.63014	0.79673	-30	16	0.15272	0.62502	-26	20	0.21401	0.74962	-7	19	0.24195	0.44062
YER097W	-26	29	0.42845	0.46058	-30	36	0.16153	0.58553	-29	8	0.16822	0.45965	-20	-23	0.32067	0.0925	-14	4	0.09796	0.13553
YER098W	-32	11	0.34411	0.23442	-7	33	0.59611	0.54828	-27	11	0.20344	0.5188	-7	-6	0.60326	0.31722	-10	15	0.17001	0.3422
YER098W	-51	-1	0.13333	0.09959	-19	23	0.35709	0.40388	-28	-3	0.1852	0.23022	-21	-1	0.30065	0.40789	14	2	0.80269	0.10812
YER099C	-45	3	0.18255	0.14331	11	99	0.82674	0.9455	-9	13	0.71153	0.56371	-25	31	0.22989	0.85594	-1	33	0.42543	0.73361
YER099C	-24	10	0.45496	0.2226	20	82	0.87617	0.9048	-20	19	0.37679	0.67836	-5	6	0.64549	0.53549	9	20	0.70404	0.46688
YER100W	-18	33	0.5331	0.50327	0	50	0.70935	0.73419	-12	14	0.63095	0.58297	-10	21	0.54286	0.76182	2	30	0.51427	0.6852
YER100W	-26	21	0.42845	0.36247	-15	57	0.43573	0.78972	-13	24	0.59995	0.76179	17	1	0.91876	0.44379	6	32	0.62811	0.71865
YER101C	994	113	0.97751	0.93734	550	61	0.98217	0.81558	35	24	0.97595	0.76179	1005	569	0.99413	0.99275	449	95	0.99406	0.98549
YER101C	851	126	0.97555	0.95387	440	57	0.97965	0.78972	7	37	0.93104	0.88716	1013	575	0.99424	0.99286	355	81	0.99372	0.98001
YER106W	-36	33	0.28537	0.50327	-31	-2	0.1483	0.08714	-30	28	0.15272	0.81399	2	11	0.76734	0.61592	-12	0	0.12765	0.08495
YER106W	-41	35	0.22352	0.52208	-41	3	0.06426	0.12979	-15	-9	0.53624	0.14315	-12	6	0.50017	0.53549	1	13	0.48401	0.29801
YER107C	-50	-8	0.13952	0.0452	-29	18	0.17475	0.32754	-25	46	0.24515	0.93332	-20	4	0.32067	0.50132	13	33	0.78625	0.73361
YER107C	-48	25	0.15421	0.41296	-36	32	0.09795	0.53541	-37	5	0.06861	0.39012	-13	18	0.47831	0.72477	35	49	0.9582	0.91208
YER109C	n	n	n	n	n	n	n	n	36541	242	0.99943	0.99464	-3	19	0.683	0.73858	-20	26	0.04179	0.60687
YER109C	n	n	n	n	n	n	n	n	49017	327	1	0.99601	13	-16	0.88931	0.16741	10	43	0.72539	0.86526
YER112W	-37	20	0.27148	0.34893	-20	26	0.33536	0.44918	-31	14	0.1338	0.58297	-1	11	0.71855	0.61592	15	40	0.81947	0.83295
YER112W	-39	33	0.24555	0.50327	-28	5	0.18889	0.15118	-14	15	0.5661	0.60303	7	29	0.83396	0.84029	3	9	0.54224	0.21705
YER113C	-18	21	0.5331	0.36247	-25	32	0.24005	0.53541	-15	13	0.53624	0.56371	-1	3	0.71855	0.48256	7	23	0.65528	0.53562
YER113C	-30	28	0.37314	0.44899	-27	40	0.20406	0.63612	-4	15	0.81912	0.60303	-24	1	0.24657	0.44379	14	33	0.80269	0.73361
YER116C	-29	11	0.38726	0.23442	-4	27	0.64842	0.46481	2	26	0.89218	0.78926	0	-32	0.73443	0.03935	-13	-2	0.11224	0.06736
[truncated: 6,833 more rows]

## Sheet: Collapsed Data
			mRNA	Total RNA
Name	Gene	Process	Median PR F635	Median PR F532
YAL003W	EFB1	translational elongation	0.63052	0.63154
YAL007C	ERP2	ER to Golgi vesicle-mediated transport	0.44486	0.559435
YAL008W	FUN14	biological_process	0.346225	0.61592
YAL009W	SPO7	sporulation (sensu Fungi)*	0.623295	0.708595
YAL012W	CYS3	response to drug*	0.466995	0.672555
YAL013W	DEP1	telomere maintenance*	0.44952	0.56659
YAL016W	TPD3	translation*	0.565515	0.397435
YAL018C	YAL018C	biological_process	0.57018	0.63179
YAL019W	FUN30	chromosome organization and biogenesis (sensu Eukaryota)	0.33389	0.272495
YAL020C	ATS1	tRNA modification*	0.65411	0.743295
YAL022C	FUN26	nucleoside transport	0.295735	0.580065
YAL023C	PMT2	protein amino acid O-linked glycosylation	0.46317	0.47356
YAL026C	DRS2	endocytosis*	0.44673	0.17697
YAL027W	YAL027W	biological_process	0.756345	0.811485
YAL028W	FRT2	response to stress	0.50564	0.921805
YAL030W	SNC1	endocytosis*	0.6809	0.733945
YAL032C	PRP45	nuclear mRNA splicing, via spliceosome*	0.510385	0.77678
YAL033W	POP5	rRNA processing*	0.3202	0.2627
YAL034C	FUN19	biological_process	0.73107	0.47971
YAL034W-A	MTW1	chromosome segregation	0.695625	0.82786
YAL037W	YAL037W	biological_process	0.60264	0.719925
YAL038W	CDC19	glycolysis*	0.59071	0.66775
YAL039C	CYC3	cytochrome c-heme linkage	0.67114	0.802745
YAL040C	CLN3	G1/S transition of mitotic cell cycle*	0.382585	0.598615
YAL041W	CDC24	pseudohyphal growth*	0.5057	0.74534
YAL042W	ERV46	ER to Golgi vesicle-mediated transport	0.455645	0.59898
YAL043C	PTA1	mRNA cleavage*	0.322975	0.60032
YAL043C-A	#N/A	#N/A	0.58546	0.68967
YAL044C	GCV3	telomere maintenance*	0.343545	0.35846
YAL045C	#N/A	#N/A	0.44119	0.377955
YAL046C	YAL046C	biological_process	0.511475	0.73576
YAL048C	GEM1	vesicle-mediated transport	0.4628	0.32351
YAL049C	YAL049C	biological_process	0.65393	0.865905
YAL051W	OAF1	peroxisome organization and biogenesis*	0.64971	0.61688
YAL053W	FLC2	protein folding*	0.55711	0.230365
YAL054C	ACS1	histone acetylation*	0.70935	0.62451
YAL055W	PEX22	protein targeting to peroxisome	0.566895	0.44184
YAL056W	GPB2	telomere maintenance*	0.387075	0.53252
YAL058C-A	#N/A	#N/A	0.07973	0.17869
YAL059W	ECM1	cell wall organization and biogenesis*	0.27465	0.2059
YAL064C-A	YAL064C-A	biological_process	0.34634	0.39076
YAL064W	YAL064W	biological_process	0.490515	0.52131
YAL066W	#N/A	#N/A	0.379165	0.53196
YAL068C	PAU8	sporulation (sensu Fungi)*	0.66325	0.6189
YAR002W	NUP60	telomere maintenance*	0.41627	0.777645
YAR003W	SWD1	telomere maintenance*	0.59457	0.60722
YAR008W	SEN34	tRNA splicing	0.5423	0.56017
YAR014C	BUD14	regulation of transcription, DNA-dependent*	0.44627	0.2807
YAR015W	ADE1	response to drug*	0.516635	0.51632
YAR018C	KIN3	chromosome segregation	0.38676	0.651435
YAR019C	CDC15	protein amino acid phosphorylation*	0.774465	0.020355
YAR023C	YAR023C	biological_process	0.46338	0.469365
YAR027W	UIP3	biological_process	0.40626	0.49472
YAR028W	YAR028W	biological_process	0.54282	0.885195
YAR029W	YAR029W	biological_process	0.257695	0.357505
YAR030C	#N/A	#N/A	0.334655	0.463265
YAR033W	MST28	vesicle organization and biogenesis	0.71794	0.525705
YAR042W	SWH1	endocytosis*	0.44575	0.27888
YAR047C	#N/A	#N/A	0.50884	0.58152
YAR068W	YAR068W	biological_process	0.58468	0.613
YAR075W	#N/A	#N/A	0.60697	0.57554
YBL001C	ECM15	cell wall organization and biogenesis	0.438905	0.419665
YBL002W	HTB2	chromatin assembly or disassembly	0.501035	0.78322
YBL003C	HTA2	DNA repair*	0.37679	0.43221
YBL006C	LDB7	telomere maintenance*	0.33286	0.57363
YBL007C	SLA1	cell wall organization and biogenesis*	0.48605	0.437195
YBL008W	HIR1	regulation of transcription from RNA polymerase II promoter*	0.59224	0.727735
YBL009W	ALK2	protein amino acid phosphorylation*	0.57231	0.67437
YBL010C	YBL010C	biological_process	0.40111	0.72569
YBL011W	SCT1	phospholipid biosynthetic process	0.708085	0.773275
YBL012C	#N/A	#N/A	0.579775	0.69845
YBL013W	FMT1	translational initiation*	0.542855	0.417905
YBL014C	RRN6	transcription from RNA polymerase I promoter	0.404805	0.71079
YBL015W	ACH1	acetate metabolic process*	0.50863	0.473955
YBL016W	FUS3	protein amino acid phosphorylation*	0.537555	0.734825
YBL018C	POP8	rRNA processing*	0.518255	0.57135
YBL019W	APN2	base-excision repair	0.759455	0.8829
YBL021C	HAP3	transcription*	0.35806	0.361795
YBL023C	MCM2	DNA replication initiation*	0.29322	0.6426
YBL024W	NCL1	ribosome biogenesis and assembly*	0.792575	0.825875
YBL025W	RRN10	transcription from RNA polymerase I promoter	0.411495	0.486625
YBL026W	LSM2	nuclear mRNA splicing, via spliceosome*	0.22046	0.480605
YBL030C	PET9	aerobic respiration*	0.958765	0.69451
YBL031W	SHE1	biological_process	0.45855	0.591415
YBL032W	HEK2	telomere maintenance via telomerase*	0.995775	0.999365
YBL033C	RIB1	response to drug*	0.453695	0.716935
YBL036C	YBL036C	amino acid metabolic process	0.604735	0.62196
YBL037W	APL3	vesicle-mediated transport	0.64271	0.59283
YBL039C	URA7	phospholipid biosynthetic process*	0.56104	0.638965
YBL043W	ECM13	cell wall organization and biogenesis	0.555585	0.78106
YBL046W	PSY4	response to drug*	0.692215	0.596565
YBL047C	EDE1	endocytosis	0.408995	0.684545
YBL048W	#N/A	#N/A	0.33351	0.735485
YBL049W	MOH1	biological_process	0.84807	0.55759
YBL050W	SEC17	ER to Golgi vesicle-mediated transport*	0.385415	0.806055
YBL055C	YBL055C	response to oxidative stress*	0.72948	0.239
YBL057C	PTH2	translation*	0.72991	0.76927
YBL058W	SHP1	telomere maintenance*	0.6174	0.909995
YBL059W	YBL059W	biological_process	0.346655	0.56298
YBL060W	YEL1	biological_process	0.644165	0.770655
YBL061C	SKT5	response to osmotic stress*	0.26817	0.603995
YBL062W	#N/A	#N/A	0.46408	0.598925
YBL063W	KIP1	microtubule nucleation*	0.188025	0.222665
YBL064C	PRX1	response to oxidative stress*	0.967855	0.95978
YBL065W	#N/A	#N/A	0.59232	0.814185
YBL066C	SEF1	biological_process	0.67511	0.818435
YBL067C	UBP13	biological_process	0.51784	0.69506
YBL069W	AST1	protein targeting to membrane	0.599915	0.645395
YBL070C	#N/A	#N/A	0.54493	0.33564
YBL073W	#N/A	#N/A	0.70307	0.87402
YBL074C	AAR2	assembly of spliceosomal tri-snRNP	0.44165	0.49153
YBL075C	SSA3	response to stress*	0.747835	0.722685
YBL078C	ATG8	protein targeting to vacuole*	0.642	0.792825
YBL080C	PET112	translation*	0.63368	0.648895
YBL082C	ALG3	protein amino acid glycosylation*	0.704535	0.4772
YBL084C	CDC27	mitotic sister chromatid segregation*	0.729395	0.42231
YBL085W	BOI1	establishment of cell polarity (sensu Fungi)*	0.2539	0.421
YBL086C	YBL086C	biological_process	0.58468	0.51294
YBL089W	AVT5	transport	0.394555	0.42806
YBL090W	MRP21	translation*	0.51052	0.522035
YBL091C-A	SCS22	phospholipid biosynthetic process*	0.584515	0.61598
YBL093C	ROX3	transcription from RNA polymerase II promoter	0.48416	0.6079
YBL094C	#N/A	#N/A	0.613125	0.59007
YBL095W	YBL095W	biological_process	0.330945	0.589635
YBL096C	#N/A	#N/A	0.506415	0.568415
YBL097W	BRN1	mitotic sister chromatid segregation*	0.5642	0.611395
YBL098W	BNA4	NAD biosynthetic process	0.6756	0.4689
YBL100C	#N/A	#N/A	0.629125	0.595635
YBL102W	SFT2	Golgi to endosome transport	0.571095	0.510865
YBL103C	RTG3	transcription initiation from RNA polymerase II promoter*	0.53335	0.61235
YBL104C	YBL104C	biological_process	0.65606	0.754485
YBL105C	PKC1	cell wall organization and biogenesis*	0.32984	0.306885
YBL106C	SRO77	exocytosis*	0.54652	0.5331
YBL108W	#N/A	#N/A	0.381525	0.19101
YBL109W	#N/A	#N/A	0.33932	0.194665
YBR001C	NTH2	response to stress*	0.44045	0.55866
YBR003W	COQ1	ubiquinone biosynthetic process	0.540185	0.705385
YBR004C	GPI18	GPI anchor biosynthetic process	0.55448	0.465845
YBR005W	RCR1	cell wall organization and biogenesis*	0.70757	0.48812
YBR006W	UGA2	response to oxidative stress*	0.43377	0.35025
YBR010W	HHT1	chromatin assembly or disassembly	0.44952	0.84484
YBR011C	IPP1	phosphate metabolic process	0.573805	0.497995
YBR012C	#N/A	#N/A	0.641695	0.2249
YBR014C	YBR014C	biological_process	0.565155	0.808105
YBR015C	MNN2	protein amino acid glycosylation	0.304455	0.42258
YBR018C	GAL7	galactose catabolic process	0.543215	0.713605
YBR019C	GAL10	galactose catabolic process	0.711595	0.239955
YBR021W	FUR4	uracil transport	0.93515	0.62892
YBR022W	POA1	tRNA splicing	0.31313	0.247435
YBR024W	SCO2	copper ion transport	0.4018	0.589975
YBR025C	OLA1	ATP catabolic process	0.66289	0.767495
YBR027C	#N/A	#N/A	0.70718	0.743445
YBR028C	YBR028C	biological_process	0.608115	0.74962
YBR029C	CDS1	phosphatidylglycerol biosynthetic process*	0.583025	0.239
YBR031W	RPL4A	translation	0.77125	0.879985
YBR032W	#N/A	#N/A	0.568215	0.527855
YBR033W	EDS1	biological_process	0.37485	0.392385
YBR034C	HMT1	ribosome biogenesis and assembly*	0.797305	0.55992
YBR035C	PDX3	telomere maintenance*	0.95641	0.84395
YBR036C	CSG2	response to drug*	0.586435	0.536165
YBR037C	SCO1	protein complex assembly*	0.226805	0.572085
YBR038W	CHS2	cytokinesis*	0.41527	0.296035
YBR039W	ATP3	ATP synthesis coupled proton transport	0.64481	0.336855
YBR041W	FAT1	very-long-chain fatty acid metabolic process*	0.6467	0.283825
YBR042C	CST26	phospholipid biosynthetic process	0.80392	0.90219
YBR043C	QDR3	multidrug transport	0.757425	0.36571
YBR044C	TCM62	protein complex assembly	0.763995	0.633555
YBR045C	GIP1	spore wall assembly (sensu Fungi)*	0.60697	0.217495
YBR048W	RPS11B	translation*	0.40111	0.57191
YBR050C	REG2	negative regulation of transcription from RNA polymerase II promoter	0.54927	0.60687
YBR052C	RFS1	biological_process	0.711295	0.42882
YBR053C	YBR053C	biological_process	0.563775	0.69032
YBR055C	PRP6	nuclear mRNA splicing, via spliceosome	0.84413	0.930095
YBR057C	MUM2	premeiotic DNA synthesis	0.40397	0.55992
YBR058C	UBP14	response to drug*	0.702335	0.89976
YBR059C	AKL1	actin cytoskeleton organization and biogenesis*	0.358505	0.670805
YBR060C	ORC2	chromatin silencing at silent mating-type cassette*	0.45496	0.516715
YBR061C	TRM7	translation*	0.720665	0.90983
YBR064W	#N/A	#N/A	0.60879	0.647445
YBR067C	TIP1	cell wall organization and biogenesis	0.603035	0.58973
YBR068C	BAP2	amino acid transport	0.74236	0.526935
YBR069C	TAT1	amino acid transport	0.639685	0.597225
YBR071W	YBR071W	biological_process	0.61126	0.499105
YBR072W	HSP26	response to stress*	0.63194	0.523775
YBR074W	YBR074W	biological_process	0.67957	0.621915
YBR075W	#N/A	#N/A	0.482855	0.415325
YBR076W	ECM8	cell wall organization and biogenesis	0.70307	0.52156
YBR078W	ECM33	cell wall organization and biogenesis	0.50537	0.63941
YBR079C	RPG1	translational initiation	0.5925	0.588815
YBR080C	SEC18	ER to Golgi vesicle-mediated transport*	0.843405	0.77906
YBR082C	UBC4	sporulation (sensu Fungi)*	0.499745	0.56102
YBR084C-A	RPL19A	translation	0.595935	0.81271
YBR085W	AAC3	anaerobic respiration	0.00091	0.055155
YBR086C	IST2	response to osmotic stress	0.457995	0.410425
YBR087W	RFC5	mismatch repair*	0.493425	0.50921
YBR088C	POL30	chromatin silencing at telomere*	0.613925	0.631375
YBR089C-A	NHP6B	positive regulation of transcription from RNA polymerase II promoter*	0.75313	0.786385
YBR090C	YBR090C	biological_process	0.51939	0.6755
YBR091C	MRS5	protein import into mitochondrial inner membrane	0.46095	0.602225
YBR094W	PBY1	biological_process*	0.646955	0.56719
YBR096W	YBR096W	biological_process	0.73411	0.779525
YBR097W	VPS15	telomere maintenance*	0.369685	0.21705
YBR099C	#N/A	#N/A	0.23278	0.654025
YBR100W	#N/A	#N/A	0.59807	0.485135
YBR102C	EXO84	exocytosis*	0.48766	0.634055
YBR103W	SIF2	chromatin silencing at telomere*	0.52305	0.56212
YBR105C	VID24	vesicle-mediated transport*	0.47059	0.68012
YBR107C	IML3	sporulation (sensu Fungi)*	0.459115	0.706225
YBR108W	YBR108W	biological_process	0.86356	0.85876
YBR109C	CMD1	endocytosis*	0.55147	0.72025
YBR117C	TKL2	pentose-phosphate shunt	0.4411	0.47472
YBR118W	TEF2	translational elongation*	0.977145	0.948455
YBR120C	CBP6	translation	0.373615	0.36475
YBR121C	GRS1	transcription termination*	0.904705	0.898175
YBR122C	MRPL36	translation	0.201935	0.539045
YBR124W	#N/A	#N/A	0.30155	0.41121
YBR125C	PTC4	biological_process	0.259975	0.42774
YBR126C	TPS1	response to drug*	0.802755	0.798975
YBR128C	ATG14	autophagy	0.299445	0.55263
YBR129C	OPY1	conjugation with cellular fusion	0.186925	0.65416
YBR130C	SHE3	intracellular mRNA localization*	0.3202	0.47202
YBR132C	AGP2	telomere maintenance*	0.42247	0.668315
YBR133C	HSL7	G2/M transition of mitotic cell cycle*	0.711675	0.178845
YBR135W	CKS1	transcription*	0.49371	0.729665
YBR138C	YBR138C	biological_process	0.50564	0.895375
YBR139W	YBR139W	phytochelatin biosynthetic process	0.28036	0.42551
YBR142W	MAK5	ribosome biogenesis and assembly*	0.407895	0.609545
YBR146W	MRPS9	translation	0.59661	0.49284
YBR147W	YBR147W	biological_process	0.62531	0.764555
YBR148W	YSW1	biological_process	0.5796	0.57363
YBR150C	TBS1	biological_process	0.24568	0.230815
YBR151W	APD1	biological_process	0.85537	0.91172
YBR152W	SPP381	nuclear mRNA splicing, via spliceosome*	0.26672	0.78699
YBR154C	RPB5	transcription from RNA polymerase II promoter*	0.72197	0.62409
YBR155W	CNS1	protein folding	0.84207	0.93748
YBR157C	ICS2	biological_process	0.630545	0.871205
YBR159W	IFA38	fatty acid elongation	0.766715	0.93338
YBR160W	CDC28	protein amino acid phosphorylation*	0.485655	0.717655
YBR161W	CSH1	sphingolipid biosynthetic process*	0.595955	0.656995
YBR162C	TOS1	response to drug	0.27837	0.471135
YBR162W-A	YSY6	protein secretion	0.46476	0.639365
YBR164C	ARL1	protein targeting to vacuole*	0.66075	0.694605
YBR165W	UBS1	protein export from nucleus*	0.14653	0.49776
YBR166C	TYR1	tyrosine metabolic process	0.3932	0.54316
YBR167C	POP7	rRNA processing*	0.2722	0.27234
YBR168W	PEX32	peroxisome organization and biogenesis	0.20703	0.36861
YBR169C	SSE2	protein folding*	0.69942	0.688345
YBR170C	NPL4	ER-associated protein catabolic process	0.353295	0.59946
YBR171W	SEC66	filamentous growth*	0.446265	0.739005
YBR173C	UMP1	ubiquitin-dependent protein catabolic process*	0.242785	0.5762
YBR174C	#N/A	#N/A	0.516265	0.620535
YBR175W	SWD3	telomere maintenance*	0.67817	0.592195
YBR176W	ECM31	pantothenate biosynthetic process	0.49243	0.52392
YBR177C	EHT1	lipid metabolic process*	0.834875	0.798335
YBR178W	#N/A	#N/A	0.411495	0.355845
YBR183W	YPC1	ceramide metabolic process	0.53924	0.639375
YBR184W	YBR184W	biological_process	0.553285	0.49873
YBR185C	MBA1	aerobic respiration*	0.73609	0.590815
YBR188C	NTC20	nuclear mRNA splicing, via spliceosome	0.427075	0.807835
YBR190W	#N/A	#N/A	0.47608	0.605415
YBR192W	RIM2	mitochondrial genome maintenance*	0.65926	0.671355
YBR194W	SOY1	biological_process	0.30155	0.394845
YBR195C	MSI1	DNA repair*	0.45855	0.440455
YBR197C	YBR197C	biological_process	0.37623	0.742585
YBR198C	TAF5	transcription initiation from RNA polymerase II promoter*	0.281955	0.391095
YBR199W	KTR4	protein amino acid N-linked glycosylation	0.56794	0.661345
YBR204C	YBR204C	biological_process	0.44333	0.541845
YBR206W	#N/A	#N/A	0.562215	0.61566
YBR207W	FTH1	endocytosis*	0.2906	0.48964
YBR210W	ERV15	ER to Golgi vesicle-mediated transport*	0.6934	0.79483
YBR212W	NGR1	mitochondrion organization and biogenesis*	0.86926	0.78452
YBR220C	YBR220C	biological_process	0.695935	0.1324
YBR221C	PDB1	pyruvate metabolic process	0.61426	0.65326
YBR222C	PCS60	biological_process	0.99902	0.99318
YBR223C	TDP1	DNA repair	0.2911	0.4515
YBR225W	YBR225W	biological_process	0.45138	0.605275
YBR229C	ROT2	chitin- and beta-glucan-containing cell wall biogenesis	0.258315	0.607625
YBR231C	SWC5	chromatin remodeling*	0.393695	0.672645
YBR232C	#N/A	#N/A	0.596625	0.53241
YBR235W	YBR235W	biological_process	0.50125	0.528205
YBR236C	ABD1	mRNA capping	0.47638	0.69591
YBR237W	PRP5	U2-type nuclear mRNA branch site recognition	0.67151	0.84203
YBR239C	YBR239C	biological_process	0.28238	0.625595
YBR241C	YBR241C	biological_process	0.675345	0.794935
YBR242W	YBR242W	biological_process	0.30996	0.143355
YBR244W	GPX2	response to oxidative stress	0.656975	0.88255
YBR246W	YBR246W	biological_process	0.668135	0.61377
YBR252W	DUT1	pyrimidine deoxyribonucleoside triphosphate catabolic process	0.58514	0.71985
YBR253W	SRB6	transcription from RNA polymerase II promoter	0.415495	0.529325
YBR254C	TRS20	ER to Golgi vesicle-mediated transport	0.235495	0.58698
YBR256C	RIB5	riboflavin biosynthetic process	0.34994	0.41814
YBR258C	SHG1	histone methylation	0.488755	0.25388
YBR262C	FMP51	biological_process	0.39169	0.58438
YBR264C	YPT10	Golgi organization and biogenesis	0.79772	0.559475
YBR267W	REI1	ribosome biogenesis and assembly*	0.426505	0.536165
YBR269C	FMP21	biological_process	0.555585	0.335565
YBR270C	BIT2	biological_process	0.68429	0.606885
YBR272C	HSM3	mismatch repair	0.60189	0.616705
YBR273C	UBX7	ubiquitin-dependent protein catabolic process*	0.16822	0.49794
YBR282W	MRPL27	translation	0.33931	0.199285
YBR283C	SSH1	telomere maintenance*	0.265505	0.391205
YBR284W	YBR284W	telomere maintenance	0.48068	0.41101
YBR287W	ZSP1	biological_process	0.55758	0.753955
YBR291C	CTP1	mitochondrial citrate transport	0.531505	0.58623
YBR293W	VBA2	basic amino acid transport	0.93331	0.84645
YBR295W	PCA1	iron ion homeostasis*	0.35849	0.350735
YBR297W	MAL33	regulation of transcription, DNA-dependent*	0.43879	0.28374
YBR298C-A	YBR298C-A	biological_process	0.36791	0.49306
YBR299W	MAL32	maltose catabolic process	0.73981	0.74012
YCL001W-A	YCL001W-A	biological_process	0.433455	0.3566
YCL002C	YCL002C	biological_process	0.335565	0.137265
YCL008C	STP22	telomere maintenance*	0.745195	0.74996
YCL009C	ILV6	branched chain family amino acid biosynthetic process	0.806805	0.833845
YCL017C	NFS1	iron ion homeostasis*	0.62272	0.689345
YCL018W	LEU2	leucine biosynthetic process	0.532055	0.878765
YCL024W	KCC4	protein amino acid phosphorylation*	0.191375	0.125635
YCL028W	RNQ1	biological_process	0.69018	0.686125
YCL029C	BIK1	mitotic spindle organization and biogenesis in nucleus*	0.68253	0.810505
YCL030C	HIS4	histidine biosynthetic process	0.589235	0.826845
YCL033C	YCL033C	response to oxidative stress	0.64315	0.609475
YCL035C	GRX1	response to oxidative stress*	0.777505	0.85797
YCL036W	GFD2	biological_process	0.525055	0.822
YCL042W	YCL042W	biological_process	0.61288	0.88682
YCL043C	PDI1	protein folding	0.74093	0.749945
YCL045C	YCL045C	biological_process	0.31383	0.69483
YCL046W	#N/A	#N/A	0.655105	0.691215
YCL047C	YCL047C	biological_process	0.60917	0.674085
YCL050C	APA1	nucleotide metabolic process	0.60027	0.62603
YCL056C	YCL056C	biological_process	0.301765	0.543265
YCL058C	#N/A	#N/A	0.19417	0.46595
YCL061C	MRC1	telomere maintenance*	0.741415	0.31435
YCL063W	VAC17	vacuole inheritance	0.173605	0.570785
YCL064C	CHA1	threonine catabolic process*	0.52432	0.82225
YCL068C	YCL068C	biological_process	0.281315	0.5515
YCL074W	YCL074W	transposition, RNA-mediated	0.346375	0.55106
YCR002C	CDC10	cell wall organization and biogenesis*	0.269615	0.63287
YCR005C	CIT2	glutamate biosynthetic process*	0.322895	0.475105
YCR012W	PGK1	glycolysis*	0.39403	0.69594
YCR013C	#N/A	#N/A	0.632535	0.57734
YCR014C	POL4	double-strand break repair via nonhomologous end joining*	0.59995	0.59069
YCR016W	YCR016W	ribosome biogenesis and assembly	0.90517	0.907165
YCR017C	CWH43	cell wall organization and biogenesis*	0.23366	0.43031
YCR018C-A	#N/A	#N/A	0.279415	0.236475
YCR019W	MAK32	interspecies interaction between organisms	0.320915	0.57462
YCR020C	PET18	mitochondrion organization and biogenesis*	0.65987	0.752345
YCR020C-A	MAK31	telomere maintenance*	0.307795	0.69845
YCR021C	HSP30	response to stress	0.216415	0.22831
YCR022C	#N/A	#N/A	0.57852	0.55954
YCR023C	YCR023C	biological_process	0.475295	0.557745
YCR024C	SLM5	translation	0.72776	0.850185
YCR025C	#N/A	#N/A	0.271085	0.521555
YCR027C	RHB1	retrograde transport, endosome to Golgi*	0.74897	0.743765
YCR028C	FEN2	endocytosis*	0.410875	0.47926
YCR028C-A	RIM1	mitochondrial genome maintenance	0.9931	0.99988
YCR031C	RPS14A	translation*	0.35317	0.124895
YCR034W	FEN1	vesicle-mediated transport*	0.632445	0.74328
YCR038C	BUD5	pseudohyphal growth*	0.41374	0.68778
YCR041W	#N/A	#N/A	0.310245	0.54968
YCR043C	YCR043C	biological_process	0.565915	0.636365
YCR045C	YCR045C	biological_process	0.32754	0.6142
YCR049C	#N/A	#N/A	0.598085	0.672355
YCR050C	YCR050C	biological_process	0.571625	0.468595
YCR051W	YCR051W	biological_process	0.44627	0.488545
YCR052W	RSC6	RNA elongation from RNA polymerase II promoter*	0.36089	0.610825
YCR053W	THR4	endocytosis*	0.296365	0.541735
YCR054C	CTR86	biological_process	0.223665	0.625535
YCR060W	TAH1	protein folding	0.44727	0.38639
YCR061W	YCR061W	regulation of cell size	0.480835	0.39738
YCR063W	BUD31	cellular bud site selection*	0.280615	0.632435
YCR064C	#N/A	#N/A	0.310245	0.22998
YCR072C	RSA4	ribosome biogenesis and assembly*	0.994825	0.997185
YCR073W-A	SOL2	telomere maintenance*	0.4628	0.82553
YCR075C	ERS1	L-cystine transport	0.12299	0.115635
YCR076C	YCR076C	biological_process	0.405965	0.670635
YCR077C	PAT1	chromosome segregation*	0.374625	0.40762
YCR079W	PTC6	mitochondrion degradation*	0.271145	0.333375
YCR081W	SRB8	telomere maintenance*	0.171755	0.070185
YCR082W	AHC2	telomere maintenance	0.342755	0.701815
YCR083W	TRX3	response to oxidative stress	0.296075	0.49472
YCR094W	CDC50	endocytosis*	0.46122	0.26632
YCR096C	HMRA2	biological_process	0.40965	0.268375
YCR102W-A	#N/A	#N/A	0.322045	0.286875
YCR104W	PAU3	biological_process	0.4008	0.26659
YCR105W	ADH7	alcohol metabolic process	0.45138	0.460085
YCR106W	RDS1	response to xenobiotic stimulus	0.473995	0.514625
YDL001W	RMD1	biological_process	0.37623	0.46245
YDL002C	NHP10	chromatin remodeling	0.59419	0.67294
YDL004W	ATP16	ATP synthesis coupled proton transport	0.43734	0.66603
YDL007W	RPT2	ubiquitin-dependent protein catabolic process	0.70935	0.602065
YDL008W	APC11	mitotic sister chromatid segregation*	0.494715	0.575085
YDL009C	#N/A	#N/A	0.45117	0.58057
YDL010W	YDL010W	biological_process	0.530395	0.21409
YDL011C	#N/A	#N/A	0.465455	0.548235
YDL012C	YDL012C	biological_process	0.479585	0.77265
YDL013W	HEX3	telomere maintenance*	0.510925	0.63016
YDL015C	TSC13	very-long-chain fatty acid metabolic process	0.307795	0.38408
YDL017W	CDC7	protein amino acid phosphorylation*	0.60326	0.62602
YDL019C	OSH2	endocytosis*	0.714715	0.727005
YDL020C	RPN4	telomere maintenance*	0.517125	0.60731
YDL021W	GPM2	biological_process	0.637115	0.8276
YDL022W	GPD1	NADH oxidation*	0.55018	0.621515
YDL023C	#N/A	#N/A	0.619955	0.67935
YDL025C	YDL025C	biological_process	0.734065	0.90574
YDL026W	#N/A	#N/A	0.60473	0.672105
YDL027C	YDL027C	biological_process	0.66707	0.698825
YDL030W	PRP9	nuclear mRNA splicing, via spliceosome	0.559345	0.70845
YDL031W	DBP10	ribosome biogenesis and assembly*	0.98854	0.965005
YDL033C	SLM3	translation*	0.72856	0.607625
YDL034W	#N/A	#N/A	0.670835	0.571755
YDL035C	GPR1	pseudohyphal growth*	0.43714	0.19491
YDL038C	YDL038C	response to drug	0.269825	0.326445
YDL039C	PRM7	response to drug*	0.485985	0.59809
YDL042C	SIR2	chromatin silencing at telomere*	0.39551	0.44481
YDL043C	PRP11	spliceosome assembly	0.529605	0.71055
YDL044C	MTF2	translation*	0.41406	0.24522
YDL045C	FAD1	FAD biosynthetic process	0.469135	0.44918
YDL045W-A	MRP10	translation	0.221485	0.245835
YDL046W	NPC2	sterol transport	0.432785	0.54924
YDL047W	SIT4	telomere maintenance*	0.407785	0.3897
YDL048C	STP4	biological_process	0.4008	0.46481
YDL049C	KNH1	1,6-beta-glucan biosynthetic process	0.72298	0.350835
YDL050C	#N/A	#N/A	0.455645	0.51542
YDL051W	LHP1	tRNA processing	0.947985	0.9775
YDL052C	SLC1	sphingolipid biosynthetic process	0.571515	0.61953
YDL053C	PBP4	biological_process	0.26326	0.27574
YDL054C	MCH1	transport	0.679155	0.49794
YDL055C	PSA1	protein amino acid glycosylation*	0.373615	0.40687
YDL056W	MBP1	DNA replication*	0.19463	0.4071
YDL060W	TSR1	ribosome biogenesis and assembly*	0.460645	0.851975
YDL062W	#N/A	#N/A	0.48578	0.713435
YDL063C	YDL063C	ribosome biogenesis and assembly	0.2906	0.6031
YDL064W	UBC9	G2/M transition of mitotic cell cycle*	0.807905	0.64714
YDL065C	PEX19	protein folding*	0.177445	0.353605
YDL066W	IDP1	glutamate biosynthetic process*	0.367115	0.62818
YDL067C	COX9	mitochondrial electron transport, cytochrome c to oxygen	0.52053	0.385105
YDL076C	RXT3	histone deacetylation*	0.572205	0.78504
YDL078C	MDH3	fatty acid beta-oxidation*	0.998515	0.995355
YDL079C	MRK1	protein amino acid phosphorylation*	0.40064	0.499375
YDL081C	RPP1A	translational elongation*	0.714225	0.94681
YDL083C	RPS16B	translation*	0.485565	0.66477
YDL084W	SUB2	nuclear mRNA splicing, via spliceosome*	0.536925	0.368855
YDL085W	NDE2	NADH oxidation*	0.20588	0.49963
YDL086W	YDL086W	biological_process	0.518955	0.721635
YDL087C	LUC7	mRNA splice site selection	0.6261	0.741585
YDL088C	ASM4	mRNA export from nucleus*	0.5506	0.577735
YDL090C	RAM1	protein amino acid farnesylation	0.5661	0.79483
YDL091C	UBX3	biological_process	0.84297	0.81972
YDL092W	SRP14	protein targeting to ER*	0.63217	0.73275
YDL094C	#N/A	#N/A	0.574425	0.45489
YDL096C	#N/A	#N/A	0.582	0.654725
YDL098C	SNU23	nuclear mRNA splicing, via spliceosome	0.459695	0.521825
YDL099W	BUG1	ER to Golgi vesicle-mediated transport	0.868135	0.90374
YDL100C	GET3	retrograde vesicle-mediated transport, Golgi to ER*	0.599365	0.503965
YDL101C	DUN1	telomere maintenance*	0.5987	0.648645
YDL102W	CDC2	nucleotide-excision repair*	0.307075	0.328775
YDL103C	QRI1	UDP-N-acetylglucosamine biosynthetic process	0.4101	0.386735
YDL106C	PHO2	transcription*	0.50733	0.332125
YDL107W	MSS2	protein complex assembly*	0.537485	0.72099
YDL109C	YDL109C	lipid metabolic process	0.51189	0.71698
YDL110C	TMA17	biological_process	0.69617	0.768715
YDL111C	RRP42	35S primary transcript processing*	0.5057	0.68018
YDL113C	ATG20	protein targeting to vacuole*	0.438605	0.42524
YDL114W	YDL114W	biological_process	0.522505	0.499375
YDL115C	IWR1	meiosis*	0.393715	0.79352
YDL116W	NUP84	mRNA export from nucleus*	0.357135	0.513875
YDL117W	CYK3	cytokinesis	0.400705	0.590515
YDL118W	YDL118W	telomere maintenance	0.36089	0.424565
YDL119C	YDL119C	transport	0.62265	0.627155
YDL120W	YFH1	iron ion homeostasis*	0.221855	0.27948
YDL123W	SNA4	biological_process	0.73693	0.68745
YDL124W	YDL124W	metabolic process	0.994465	0.992405
YDL125C	HNT1	nucleotide metabolic process	0.69007	0.90681
YDL126C	CDC48	ubiquitin-dependent protein catabolic process*	0.2842	0.13704
YDL127W	PCL2	cell cycle	0.43445	0.319565
YDL128W	VCX1	calcium ion homeostasis*	0.602545	0.57697
YDL129W	YDL129W	biological_process	0.27333	0.57135
YDL130W	RPP1B	translational elongation*	0.90614	0.96746
YDL130W-A	STF1	ATP synthesis coupled proton transport	0.776795	0.726975
YDL131W	LYS21	lysine biosynthetic process via aminoadipic acid	0.474595	0.57182
YDL132W	CDC53	G1/S transition of mitotic cell cycle*	0.56172	0.58198
YDL134C	PPH21	translation*	0.35695	0.241665
YDL135C	RDI1	actin filament organization*	0.625795	0.64705
YDL136W	RPL35B	translation	0.385655	0.432075
YDL137W	ARF2	ER to Golgi vesicle-mediated transport*	0.61403	0.510865
YDL139C	SCM3	biological_process	0.645025	0.72415
YDL142C	CRD1	lipid biosynthetic process*	0.6169	0.46888
YDL143W	CCT4	protein folding*	0.66914	0.62117
YDL145C	COP1	ER to Golgi vesicle-mediated transport*	0.37479	0.331355
YDL149W	ATG9	protein targeting to vacuole*	0.66164	0.68979
YDL152W	#N/A	#N/A	0.14105	0.44389
YDL153C	SAS10	ribosome biogenesis and assembly*	0.73586	0.874275
YDL155W	CLB3	G2/M transition of mitotic cell cycle*	0.271575	0.461845
YDL156W	YDL156W	biological_process	0.501135	0.399015
YDL158C	#N/A	#N/A	0.3462	0.54753
YDL160C	DHH1	deadenylation-dependent decapping*	0.30952	0.19528
YDL162C	#N/A	#N/A	0.314625	0.293845
YDL163W	#N/A	#N/A	0.459115	0.421215
YDL165W	CDC36	regulation of transcription from RNA polymerase II promoter*	0.386085	0.442455
YDL166C	FAP7	response to oxidative stress*	0.657445	0.71085
YDL168W	SFA1	formaldehyde catabolic process	0.42018	0.72772
YDL169C	UGX2	biological_process	0.53767	0.47457
YDL171C	GLT1	glutamate biosynthetic process	0.566315	0.32562
YDL172C	#N/A	#N/A	0.493845	0.328555
YDL173W	YDL173W	biological_process	0.44237	0.745295
YDL174C	DLD1	aerobic respiration*	0.42697	0.416955
YDL175C	AIR2	mRNA export from nucleus*	0.43113	0.497635
YDL176W	YDL176W	biological_process	0.59803	0.711745
YDL177C	YDL177C	biological_process	0.89208	0.7645
YDL178W	DLD2	lactate metabolic process	0.482895	0.527105
YDL179W	PCL9	cell cycle	0.39684	0.553635
YDL181W	INH1	ATP synthesis coupled proton transport	0.66758	0.328345
YDL182W	LYS20	lysine biosynthetic process via aminoadipic acid	0.50722	0.514305
YDL183C	YDL183C	biological_process	0.47883	0.21176
YDL186W	YDL186W	biological_process	0.583985	0.47472
YDL187C	#N/A	#N/A	0.2731	0.38275
YDL188C	PPH22	translation*	0.58468	0.548615
YDL191W	RPL35A	translation	0.361835	0.38543
YDL192W	ARF1	telomere maintenance*	0.59835	0.71323
YDL194W	SNF3	signal transduction*	0.42152	0.36488
YDL196W	#N/A	#N/A	0.28311	0.234905
YDL197C	ASF2	chromatin silencing at silent mating-type cassette	0.5865	0.43964
YDL198C	GGC1	mitochondrial genome maintenance*	0.60275	0.34675
YDL201W	TRM8	ribosome biogenesis and assembly*	0.818085	0.4784
YDL202W	MRPL11	translation	0.450765	0.524935
YDL203C	ACK1	biological_process	0.586595	0.57191
YDL204W	RTN2	biological_process	0.661155	0.48589
YDL205C	HEM3	heme biosynthetic process	0.28284	0.384025
YDL207W	GLE1	poly(A)+ mRNA export from nucleus	0.308195	0.457155
YDL208W	NHP2	35S primary transcript processing*	0.42748	0.703365
YDL209C	CWC2	nuclear mRNA splicing, via spliceosome	0.45575	0.206255
YDL210W	UGA4	transport*	0.476735	0.43891
YDL211C	YDL211C	biological_process	0.552835	0.679315
YDL212W	SHR3	ER to Golgi vesicle-mediated transport*	0.71846	0.594195
YDL216C	RRI1	adaptation to pheromone during conjugation with cellular fusion*	0.19432	0.218695
YDL217C	TIM22	protein import into mitochondrial inner membrane	0.353935	0.379235
YDL218W	YDL218W	biological_process	0.64481	0.121145
YDL219W	DTD1	translation*	0.434985	0.52759
YDL220C	CDC13	telomere maintenance*	0.962285	0.996045
YDL223C	HBT1	cellular morphogenesis during conjugation with cellular fusion	0.577725	0.832265
YDL224C	WHI4	regulation of cell size	0.27944	0.146215
YDL225W	SHS1	establishment of cell polarity (sensu Fungi)*	0.736545	0.654695
YDL228C	#N/A	#N/A	0.22511	0.23535
YDL230W	PTP1	protein amino acid dephosphorylation	0.805495	0.51284
YDL231C	BRE4	endocytosis	0.40448	0.32219
YDL233W	YDL233W	biological_process	0.358625	0.49794
YDL235C	YPD1	response to osmotic stress*	0.5057	0.50971
YDL236W	PHO13	protein amino acid dephosphorylation*	0.43362	0.54966
YDL238C	GUD1	guanine metabolic process	0.081945	0.072825
YDL241W	YDL241W	biological_process	0.66571	0.57512
YDL243C	AAD4	response to toxin*	0.528705	0.488015
YDL244W	THI13	thiamin biosynthetic process	0.558425	0.56553
YDL248W	COS7	biological_process	0.60608	0.416805
YDR001C	NTH1	response to stress*	0.33536	0.259195
YDR002W	YRB1	ubiquitin-dependent protein catabolic process*	0.59295	0.71468
YDR003W	RCR2	vesicle-mediated transport	0.528705	0.30927
YDR007W	TRP1	tryptophan biosynthetic process*	0.45016	0.61022
YDR008C	#N/A	#N/A	0.419795	0.53919
YDR018C	YDR018C	phospholipid biosynthetic process	0.52117	0.69591
YDR019C	GCV1	one-carbon compound metabolic process*	0.312625	0.209845
YDR020C	YDR020C	biological_process	0.47858	0.30514
YDR021W	FAL1	35S primary transcript processing	0.87266	0.83432
YDR022C	CIS1	autophagy*	0.23085	0.40915
YDR023W	SES1	seryl-tRNA aminoacylation	0.863185	0.878355
YDR024W	#N/A	#N/A	0.67817	0.50837
YDR025W	RPS11A	translation*	0.582515	0.72487
YDR026C	YDR026C	biological_process	0.71395	0.807355
YDR029W	#N/A	#N/A	0.55491	0.440495
YDR031W	MIC14	biological_process	0.67124	0.890355
YDR032C	PST2	biological_process	0.47445	0.577545
YDR034C	LYS14	lysine biosynthetic process via aminoadipic acid	0.630725	0.51301
YDR034C-A	YDR034C-A	biological_process	0.688715	0.47097
YDR034W-B	YDR034W-B	biological_process	0.742335	0.44889
YDR035W	ARO3	aromatic amino acid family biosynthetic process	0.521765	0.678725
YDR037W	KRS1	lysyl-tRNA aminoacylation	0.784485	0.674475
YDR038C	ENA5	sodium ion transport	0.169945	0.2743
YDR040C	ENA1	response to salt stress*	0.196475	0.25051
YDR041W	RSM10	translation	0.66911	0.5562
YDR042C	YDR042C	biological_process	0.450295	0.41417
YDR043C	NRG1	regulation of transcription from RNA polymerase II promoter*	0.68273	0.57684
YDR044W	HEM13	heme biosynthetic process	0.771675	0.912735
YDR045C	RPC11	transcription from RNA polymerase III promoter	0.43016	0.4033
YDR047W	HEM12	heme biosynthetic process	0.7262	0.818435
YDR048C	#N/A	#N/A	0.5057	0.49308
YDR050C	TPI1	glycolysis	0.55038	0.566155
YDR051C	YDR051C	biological_process	0.99743	0.93323
YDR053W	#N/A	#N/A	0.49243	0.52425
YDR054C	CDC34	G1/S transition of mitotic cell cycle*	0.25383	0.27725
YDR055W	PST1	cell wall organization and biogenesis*	0.278835	0.23726
YDR056C	YDR056C	biological_process	0.54652	0.69452
YDR058C	TGL2	lipid metabolic process	0.32934	0.40431
YDR059C	UBC5	endocytosis*	0.76844	0.69636
YDR061W	YDR061W	biological_process	0.286065	0.5604
YDR062W	LCB2	sphingolipid biosynthetic process	0.150475	0.25929
YDR064W	RPS13	translation	0.43377	0.512765
YDR065W	YDR065W	vacuolar acidification	0.199975	0.343605
YDR066C	YDR066C	biological_process	0.402195	0.56659
YDR068W	DOS2	biological_process	0.556595	0.5067
YDR069C	DOA4	telomere maintenance*	0.224295	0.265615
YDR070C	FMP16	biological_process	0.54493	0.58425
YDR071C	PAA1	establishment and/or maintenance of chromatin architecture	0.46603	0.459115
YDR072C	IPT1	sphingolipid biosynthetic process*	0.25998	0.19537
YDR073W	SNF11	chromatin remodeling	0.39145	0.433435
YDR074W	TPS2	response to stress*	0.379375	0.311135
YDR075W	PPH3	response to drug*	0.38137	0.450815
YDR076W	RAD55	meiotic DNA recombinase assembly*	0.40686	0.218605
YDR077W	SED1	cell wall organization and biogenesis*	0.49121	0.661685
YDR078C	SHU2	error-free DNA repair	0.455355	0.46546
YDR079W	PET100	aerobic respiration*	0.299315	0.48955
YDR086C	SSS1	SRP-dependent cotranslational protein targeting to membrane, translocation*	0.5661	0.647675
YDR087C	RRP1	ribosome biogenesis and assembly*	0.45635	0.576645
YDR091C	RLI1	translational initiation*	0.20375	0.70568
YDR092W	UBC13	protein monoubiquitination*	0.38137	0.505955
YDR094W	#N/A	#N/A	0.25152	0.657475
YDR098C	GRX3	response to oxidative stress*	0.560145	0.62796
YDR099W	BMH2	sporulation (sensu Fungi)*	0.528705	0.59221
YDR100W	TVP15	vesicle-mediated transport	0.586755	0.728735
YDR102C	#N/A	#N/A	0.586905	0.476765
YDR108W	GSG1	ER to Golgi vesicle-mediated transport*	0.41867	0.541735
YDR109C	YDR109C	biological_process	0.557825	0.69521
YDR112W	#N/A	#N/A	0.392895	0.498345
YDR113C	PDS1	mitotic sister chromatid segregation*	0.479165	0.33785
YDR115W	YDR115W	telomere maintenance*	0.493435	0.63773
YDR120C	TRM1	ribosome biogenesis and assembly*	0.920205	0.93553
YDR123C	INO2	positive regulation of transcription from RNA polymerase II promoter*	0.241575	0.68168
YDR126W	SWF1	spore wall assembly (sensu Fungi)*	0.117275	0.366755
YDR131C	YDR131C	ubiquitin-dependent protein catabolic process	0.36737	0.291905
YDR132C	YDR132C	biological_process	0.621775	0.55949
YDR133C	#N/A	#N/A	0.356695	0.316635
YDR135C	YCF1	response to drug*	0.40345	0.298685
YDR139C	RUB1	protein neddylation	0.535535	0.46275
YDR140W	MTQ2	peptidyl-glutamine methylation	0.188875	0.524925
YDR145W	TAF12	transcription initiation from RNA polymerase II promoter*	0.060995	0.2747
YDR146C	SWI5	G1-specific transcription in mitotic cell cycle	0.37129	0.53694
YDR147W	EKI1	phosphatidylethanolamine biosynthetic process	0.535535	0.499915
YDR148C	KGD2	tricarboxylic acid cycle*	0.50179	0.45866
YDR149C	#N/A	#N/A	0.54814	0.426545
YDR151C	CTH1	iron ion homeostasis*	0.11462	0.3454
YDR152W	GIR2	biological_process	0.493845	0.584275
YDR153C	ENT5	Golgi to endosome transport*	0.9013	0.93814
YDR154C	#N/A	#N/A	0.2842	0.349035
YDR155C	CPR1	sporulation (sensu Fungi)*	0.38427	0.399605
YDR156W	RPA14	telomere maintenance*	0.41693	0.49153
YDR158W	HOM2	response to drug*	0.26274	0.142545
YDR162C	NBP2	response to heat*	0.17739	0.26353
YDR165W	TRM82	ribosome biogenesis and assembly*	0.35702	0.57729
YDR167W	TAF10	transcription initiation from RNA polymerase II promoter*	0.395555	0.31575
YDR168W	CDC37	regulation of progression through cell cycle*	0.821135	0.67699
YDR169C	STB3	biological_process	0.554045	0.574975
YDR170W-A	#N/A	#N/A	0.54092	0.331445
YDR173C	ARG82	response to drug*	0.20344	0.184845
YDR176W	NGG1	response to drug*	0.25152	0.19787
YDR179C	CSN9	adaptation to pheromone during conjugation with cellular fusion*	0.39018	0.49133
YDR181C	SAS4	chromatin silencing at telomere	0.41072	0.54251
YDR182W	CDC1	DNA repair*	0.337485	0.25855
YDR183W	PLP1	positive regulation of transcription from RNA polymerase II promoter by pheromones*	0.17686	0.42175
YDR184C	ATC1	telomere maintenance*	0.260435	0.372855
YDR185C	YDR185C	biological_process	0.25229	0.1907
YDR187C	#N/A	#N/A	0.38844	0.280205
YDR188W	CCT6	protein folding*	0.53977	0.58646
YDR189W	SLY1	ER to Golgi vesicle-mediated transport	0.619015	0.665945
YDR191W	HST4	chromatin silencing at telomere*	0.0911	0.47465
YDR192C	NUP42	mRNA export from nucleus*	0.36215	0.320995
YDR194C	MSS116	RNA splicing	0.82602	0.421
YDR195W	REF2	telomere maintenance*	0.295735	0.584715
YDR196C	YDR196C	coenzyme A biosynthetic process	0.368205	0.5471
YDR197W	CBS2	translation	0.446875	0.529855
YDR198C	RKM2	peptidyl-lysine tri-methylation*	0.319725	0.224445
YDR200C	VPS64	protein targeting to vacuole*	0.2724	0.28316
YDR202C	RAV2	vacuolar acidification*	0.564965	0.46818
YDR203W	#N/A	#N/A	0.360735	0.43309
YDR204W	COQ4	ubiquinone biosynthetic process	0.05128	0.183385
YDR207C	UME6	response to drug*	0.413305	0.406725
YDR208W	MSS4	sporulation (sensu Fungi)*	0.361135	0.15048
YDR212W	TCP1	protein folding*	0.414625	0.242585
YDR214W	AHA1	response to stress*	0.60665	0.405885
YDR224C	HTB1	chromatin assembly or disassembly*	0.43293	0.494055
YDR225W	HTA1	DNA repair*	0.29088	0.440185
YDR228C	PCF11	mRNA cleavage*	0.13005	0.535655
YDR229W	IVY1	secretory pathway	0.197335	0.27175
YDR230W	#N/A	#N/A	0.394145	0.494905
YDR231C	COX20	aerobic respiration*	0.389005	0.57182
YDR232W	HEM1	regulation of transcription*	0.63052	0.565625
YDR235W	PRP42	nuclear mRNA splicing, via spliceosome	0.455395	0.43309
YDR237W	MRPL7	translation	0.404155	0.47803
YDR239C	YDR239C	biological_process	0.25506	0.4733
YDR244W	PEX5	peroxisome organization and biogenesis*	0.479185	0.49262
YDR247W	VHS1	protein amino acid phosphorylation*	0.361135	0.41336
YDR249C	YDR249C	biological_process	0.589295	0.266215
YDR250C	#N/A	#N/A	0.256585	0.14859
YDR251W	PAM1	pseudohyphal growth	0.52046	0.45446
YDR253C	MET32	sulfur amino acid metabolic process	0.376605	0.43251
YDR256C	CTA1	oxygen and reactive oxygen species metabolic process*	0.431485	0.72183
YDR257C	SET7	biological_process	0.43959	0.781245
YDR259C	YAP6	positive regulation of transcription from RNA polymerase II promoter	0.718715	0.798855
YDR262W	YDR262W	biological_process	0.235805	0.71399
YDR263C	DIN7	DNA repair	0.363	0.270205
YDR264C	AKR1	endocytosis*	0.093315	0.119635
YDR265W	PEX10	peroxisome organization and biogenesis	0.63194	0.299785
YDR266C	YDR266C	biological_process	0.50179	0.399835
YDR267C	CIA1	biological_process	0.53047	0.229685
YDR268W	MSW1	tryptophanyl-tRNA aminoacylation	0.546955	0.31411
YDR270W	CCC2	iron ion homeostasis*	0.543645	0.191805
YDR271C	#N/A	#N/A	0.67151	0.769375
YDR273W	DON1	meiosis*	0.563185	0.58249
YDR274C	#N/A	#N/A	0.344895	0.21988
YDR275W	BSC2	biological_process	0.7051	0.40158
YDR276C	PMP3	cation transport*	0.2094	0.304365
YDR279W	RNH202	DNA replication	0.108385	0.395425
YDR280W	RRP45	35S primary transcript processing*	0.55486	0.61332
YDR281C	PHM6	response to drug	0.29663	0.41814
YDR282C	YDR282C	biological_process	0.214635	0.203165
YDR285W	ZIP1	synapsis	0.151475	0.17156
YDR286C	YDR286C	biological_process	0.46603	0.44502
YDR290W	#N/A	#N/A	0.6174	0.59131
YDR292C	SRP101	protein targeting to ER*	0.69505	0.793275
YDR293C	SSD1	response to drug*	0.27465	0.29058
YDR294C	DPL1	sphingolipid metabolic process*	0.400705	0.36496
YDR295C	HDA2	telomere maintenance*	0.38687	0.287675
YDR297W	SUR2	sphingolipid biosynthetic process*	0.56576	0.523505
YDR299W	BFR2	ER to Golgi vesicle-mediated transport	0.341585	0.392
YDR303C	RSC3	RNA elongation from RNA polymerase II promoter*	0.40651	0.16895
YDR304C	CPR5	biological_process	0.56986	0.334505
YDR307W	YDR307W	biological_process	0.372645	0.28588
YDR308C	SRB7	transcription from RNA polymerase II promoter	0.265715	0.51863
YDR309C	GIC2	establishment of cell polarity (sensu Fungi)*	0.347955	0.43829
YDR312W	SSF2	ribosome biogenesis and assembly*	0.662895	0.632595
YDR313C	PIB1	protein ubiquitination	0.455395	0.463265
YDR314C	RAD34	nucleotide-excision repair	0.204885	0.19851
YDR316W	OMS1	biological_process	0.453965	0.55088
YDR317W	HIM1	DNA repair	0.38558	0.17897
YDR318W	MCM21	chromosome segregation	0.68413	0.22265
YDR319C	YDR319C	biological_process	0.250835	0.25212
YDR320C	SWA2	telomere maintenance*	0.376995	0.17156
YDR323C	PEP7	vesicle fusion*	0.867205	0.35719
YDR327W	#N/A	#N/A	0.271895	0.2007
YDR328C	SKP1	cytokinesis*	0.67124	0.66782
YDR329C	PEX3	peroxisome organization and biogenesis*	0.4671	0.431835
YDR331W	GPI8	attachment of GPI anchor to protein	0.52702	0.50178
YDR332W	IRC3	biological_process	0.541315	0.20267
YDR334W	SWR1	chromatin remodeling*	0.503885	0.27879
YDR335W	MSN5	protein export from nucleus	0.54847	0.623035
YDR337W	MRPS28	translation*	0.464455	0.310685
YDR344C	#N/A	#N/A	0.64673	0.49813
YDR346C	SVF1	response to oxidative stress	0.372605	0.43477
YDR351W	SBE2	cell wall organization and biogenesis	0.263655	0.17971
YDR353W	TRR1	response to oxidative stress*	0.53767	0.542365
YDR354W	TRP4	tryptophan biosynthetic process	0.468615	0.503645
YDR357C	YDR357C	biological_process	0.14502	0.33573
YDR358W	GGA1	Golgi to vacuole transport*	0.57782	0.686385
YDR359C	VID21	DNA repair*	0.20614	0.13545
YDR362C	TFC6	transcription initiation from RNA polymerase III promoter	0.75926	0.50302
YDR363W	ESC2	chromatin silencing at silent mating-type cassette	0.299245	0.12375
YDR363W-A	SEM1	telomere maintenance*	0.5642	0.560975
YDR364C	CDC40	G1/S transition of mitotic cell cycle*	0.400295	0.36593
YDR367W	YDR367W	biological_process	0.25478	0.448995
YDR370C	YDR370C	biological_process	0.52046	0.581235
YDR371W	CTS2	biological_process	0.44287	0.3886
YDR374C	YDR374C	biological_process	0.54792	0.297755
YDR375C	BCS1	aerobic respiration*	0.703285	0.219825
YDR376W	ARH1	iron ion homeostasis	0.731145	0.67091
YDR377W	ATP17	ATP synthesis coupled proton transport	0.24903	0.63929
YDR378C	LSM6	nuclear mRNA splicing, via spliceosome*	0.56056	0.47692
YDR379W	RGA2	pseudohyphal growth*	0.42065	0.23124
YDR381W	YRA1	mRNA export from nucleus	0.45472	0.40303
YDR382W	RPP2B	translational elongation*	0.28552	0.278145
YDR383C	NKP1	biological_process	0.38315	0.44205
YDR388W	RVS167	endocytosis*	0.489175	0.33598
YDR389W	SAC7	small GTPase mediated signal transduction*	0.40401	0.37848
YDR390C	UBA2	protein sumoylation	0.203635	0.295985
YDR394W	RPT3	ubiquitin-dependent protein catabolic process	0.69122	0.560915
YDR395W	SXM1	mRNA export from nucleus*	0.153835	0.332125
YDR397C	NCB2	positive regulation of transcription from RNA polymerase II promoter*	0.6154	0.593685
YDR398W	UTP5	ribosome biogenesis and assembly*	0.709265	0.830195
YDR399W	HPT1	GMP salvage*	0.20493	0.46928
YDR400W	URH1	ER-associated protein catabolic process*	0.441185	0.402765
YDR401W	#N/A	#N/A	0.548075	0.542895
YDR403W	DIT1	spore wall assembly (sensu Fungi)	0.33985	0.45407
YDR404C	RPB7	transcription from RNA polymerase II promoter	0.573235	0.75765
YDR405W	MRP20	translation	0.152735	0.27754
YDR411C	DFM1	unfolded protein response*	0.98626	0.64058
YDR414C	ERD1	protein amino acid glycosylation*	0.3844	0.284565
YDR415C	YDR415C	biological_process	0.582175	0.45747
YDR416W	SYF1	nuclear mRNA splicing, via spliceosome*	0.390405	0.24943
YDR419W	RAD30	DNA repair*	0.092995	0.200645
YDR423C	CAD1	positive regulation of transcription from RNA polymerase II promoter*	0.47516	0.39301
YDR425W	SNX41	retrograde transport, endosome to Golgi	0.54792	0.391245
YDR427W	RPN9	ubiquitin-dependent protein catabolic process	0.36075	0.07599
YDR428C	YDR428C	biological_process	0.54834	0.53419
YDR429C	TIF35	translational initiation	0.86978	0.77107
YDR432W	NPL3	pseudohyphal growth*	0.994765	0.994355
YDR434W	GPI17	attachment of GPI anchor to protein	0.60608	0.692025
YDR437W	GPI19	GPI anchor biosynthetic process	0.092815	0.37742
YDR439W	LRS4	chromatin silencing at rDNA*	0.92696	0.759455
YDR440W	DOT1	chromatin silencing at telomere*	0.29862	0.136335
YDR441C	APT2	biological_process	0.761215	0.657615
YDR443C	SSN2	telomere maintenance*	0.42188	0.31031
YDR444W	YDR444W	biological_process	0.541865	0.37892
YDR448W	ADA2	histone acetylation*	0.529655	0.236735
YDR449C	UTP6	ribosome biogenesis and assembly*	0.30528	0.47949
YDR453C	TSA2	response to oxidative stress*	0.70739	0.72333
YDR454C	GUK1	GMP metabolic process	0.438275	0.32219
YDR456W	NHX1	vacuolar acidification*	0.65606	0.49472
YDR458C	HEH2	biological_process	0.371675	0.266785
YDR459C	PFA5	protein amino acid palmitoylation	0.29348	0.15555
YDR460W	TFB3	transcription initiation from RNA polymerase II promoter*	0.25645	0.28526
YDR462W	MRPL28	translation	0.43211	0.46266
YDR465C	RMT2	ribosome biogenesis and assembly*	0.33729	0.483455
YDR467C	#N/A	#N/A	0.41527	0.161725
YDR468C	TLG1	vesicle fusion	0.25506	0.361325
YDR469W	SDC1	chromatin silencing at telomere*	0.265715	0.26427
YDR470C	UGO1	transport*	0.347785	0.680445
YDR471W	RPL27B	translation	0.4711	0.744185
YDR472W	TRS31	ER to Golgi vesicle-mediated transport	0.25716	0.1736
YDR473C	PRP3	nuclear mRNA splicing, via spliceosome	0.346295	0.64278
YDR474C	#N/A	#N/A	0.499305	0.755705
YDR475C	JIP4	biological_process	0.83916	0.64952
YDR476C	YDR476C	biological_process	0.46442	0.7293
YDR478W	SNM1	rRNA processing*	0.80771	0.45046
YDR479C	PEX29	peroxisome organization and biogenesis	0.492275	0.35997
YDR480W	DIG2	invasive growth (sensu Saccharomyces)	0.47745	0.16274
YDR483W	KRE2	protein amino acid O-linked glycosylation*	0.20578	0.143715
YDR484W	VPS52	Golgi to vacuole transport*	0.519015	0.408675
YDR486C	VPS60	response to drug*	0.468195	0.82019
YDR487C	RIB3	aerobic respiration*	0.32766	0.600565
YDR488C	PAC11	nuclear migration, microtubule-mediated*	0.602925	0.572825
YDR489W	SLD5	DNA-dependent DNA replication	0.20234	0.37203
YDR491C	#N/A	#N/A	0.29738	0.51291
YDR493W	FMP36	biological_process	0.53924	0.58057
YDR494W	RSM28	translation*	0.439555	0.58324
YDR497C	ITR1	myo-inositol transport	0.441695	0.47465
YDR498C	SEC20	vesicle fusion*	0.46217	0.17406
YDR499W	LCD1	DNA damage checkpoint*	0.420605	0.7295
YDR500C	RPL37B	translation	0.632225	0.870415
YDR502C	SAM2	methionine metabolic process	0.55092	0.42071
YDR504C	SPG3	biological_process	0.600235	0.75917
YDR505C	PSP1	biological_process	0.419695	0.440465
YDR506C	YDR506C	biological_process	0.24235	0.490935
YDR507C	GIN4	protein amino acid phosphorylation*	0.32675	0.30489
YDR508C	GNP1	amino acid transport	0.507275	0.48789
YDR509W	#N/A	#N/A	0.27531	0.16311
YDR510W	SMT3	protein sumoylation	0.74669	0.77163
YDR511W	ACN9	gluconeogenesis*	0.522745	0.70102
YDR512C	EMI1	sporulation (sensu Fungi)*	0.659555	0.65902
YDR513W	GRX2	response to oxidative stress*	0.773825	0.643585
YDR514C	YDR514C	biological_process	0.147935	0.753025
YDR515W	SLF1	copper ion homeostasis*	0.58865	0.71043
YDR516C	EMI2	response to drug*	0.6783	0.917095
YDR517W	GRH1	mitotic spindle checkpoint*	0.29979	0.325295
YDR518W	EUG1	protein folding	0.452115	0.269565
YDR520C	YDR520C	biological_process	0.389005	0.229685
YDR521W	#N/A	#N/A	0.446915	0.747425
YDR522C	SPS2	sporulation (sensu Fungi)*	0.59685	0.717235
YDR523C	SPS1	protein amino acid phosphorylation*	0.40779	0.485175
YDR524C	AGE1	ER to Golgi vesicle-mediated transport*	0.43211	0.43891
YDR525W	#N/A	#N/A	0.393895	0.365135
YDR528W	HLR1	cell wall organization and biogenesis	0.4826	0.366445
YDR529C	QCR7	aerobic respiration*	0.142745	0.29092
YDR530C	APA2	nucleotide metabolic process	0.805815	0.64194
YDR531W	YDR531W	coenzyme A biosynthetic process	0.43503	0.676065
YDR532C	YDR532C	telomere maintenance	0.63189	0.622445
YDR533C	HSP31	biological_process	0.46988	0.71688
YDR535C	#N/A	#N/A	0.399485	0.30173
YDR537C	#N/A	#N/A	0.30175	0.31957
YDR538W	PAD1	aromatic compound catabolic process	0.98791	0.910745
YDR539W	YDR539W	biological_process	0.551715	0.488525
YDR540C	IRC4	biological_process	0.04265	0.48812
YDR541C	YDR541C	biological_process	0.513435	0.45206
YDR543C	#N/A	#N/A	0.472875	0.35539
YEL003W	GIM4	tubulin folding	0.4008	0.69681
YEL005C	VAB2	biological_process	0.14808	0.34354
YEL006W	YEA6	transport*	0.766105	0.495275
YEL008W	#N/A	#N/A	0.142085	0.197305
YEL009C	GCN4	regulation of transcription from RNA polymerase II promoter*	0.43113	0.514625
YEL011W	GLC3	glycogen biosynthetic process	0.36045	0.245345
YEL012W	UBC8	protein monoubiquitination*	0.248685	0.23115
YEL013W	VAC8	protein targeting to vacuole*	0.316685	0.42317
YEL015W	EDC3	deadenylation-independent decapping	0.4802	0.569695
YEL016C	NPP2	phosphate metabolic process	0.35752	0.481375
YEL017C-A	PMP2	cation transport	0.22703	0.221645
YEL017W	GTT3	glutathione metabolic process	0.892175	0.844805
YEL018W	EAF5	DNA repair	0.487515	0.27794
YEL019C	MMS21	DNA repair	0.435695	0.53069
YEL025C	YEL025C	biological_process	0.307065	0.491805
YEL026W	SNU13	ribosome biogenesis and assembly*	0.835775	0.86071
YEL028W	#N/A	#N/A	0.4773	0.58032
YEL029C	BUD16	telomere maintenance*	0.770365	0.856085
YEL030W	ECM10	protein refolding*	0.514155	0.396395
YEL032W	MCM3	DNA replication initiation*	0.3554	0.445195
YEL033W	#N/A	#N/A	0.68392	0.540925
YEL034W	HYP2	translational initiation	0.572705	0.57894
YEL035C	UTR5	biological_process	0.36745	0.59069
YEL036C	ANP1	protein amino acid N-linked glycosylation	0.41527	0.48206
YEL037C	RAD23	ER-associated protein catabolic process*	0.62175	0.669305
YEL038W	UTR4	biological_process	0.62272	0.585815
YEL039C	CYC7	electron transport	0.765805	0.92343
YEL042W	GDA1	protein amino acid glycosylation	0.32105	0.285765
YEL043W	YEL043W	biological_process	0.44727	0.41417
YEL047C	YEL047C	metabolic process	0.533135	0.74572
YEL048C	YEL048C	biological_process	0.60826	0.734015
YEL049W	PAU2	biological_process	0.62907	0.624665
YEL050C	RML2	translation*	0.58771	0.607605
YEL053C	MAK10	telomere maintenance*	0.66982	0.76224
YEL054C	RPL12A	translation*	0.55631	0.38744
YEL056W	HAT2	chromatin silencing at telomere*	0.381525	0.75227
YEL057C	YEL057C	telomere maintenance	0.5632	0.609955
YEL059C-A	SOM1	proteolysis	0.32817	0.25379
YEL060C	PRB1	sporulation*	0.573175	0.757245
YEL062W	NPR2	response to drug*	0.66709	0.626205
YEL064C	AVT2	transport	0.6368	0.421385
YEL065W	SIT1	iron ion homeostasis*	0.349495	0.20773
YEL066W	HPA3	histone acetylation	0.63095	0.749675
YEL067C	YEL067C	biological_process	0.61469	0.46255
YEL071W	DLD3	lactate metabolic process	0.528255	0.699405
YEL072W	RMD6	biological_process	0.45588	0.555415
YEL073C	YEL073C	biological_process	0.25411	0.507745
YEL074W	#N/A	#N/A	0.440235	0.55748
YEL076C	YEL076C	biological_process	0.368235	0.33785
YEL076W-C	#N/A	#N/A	0.408115	0.19998
YER001W	MNN1	protein amino acid O-linked glycosylation*	0.128745	0.16963
YER002W	NOP16	ribosomal large subunit biogenesis and assembly	0.30112	0.47573
YER003C	PMI40	protein amino acid glycosylation*	0.59933	0.666025
YER004W	FMP52	biological_process	0.469525	0.714815
YER005W	YND1	protein amino acid glycosylation	0.44627	0.3446
YER006W	NUG1	ribosome biogenesis and assembly*	0.44627	0.523115
YER007C-A	TMA20	ribosome biogenesis and assembly	0.669585	0.551445
YER009W	NTF2	protein import into nucleus*	0.63822	0.49512
YER011W	TIR1	response to stress	0.128745	0.126845
YER012W	PRE1	sporulation (sensu Fungi)*	0.546395	0.44371
YER013W	PRP22	U2-dependent spliceosome disassembly*	0.595205	0.45625
YER014W	HEM14	heme biosynthetic process	0.45646	0.599105
YER017C	AFG3	translation*	0.289085	0.170275
YER018C	SPC25	chromosome segregation*	0.55441	0.54608
YER019C-A	SBH2	cotranslational protein targeting to membrane	0.71899	0.7145
YER019W	ISC1	response to salt stress*	0.39724	0.56317
YER020W	GPA2	sporulation (sensu Fungi)*	0.288575	0.49271
YER022W	SRB4	transcription from RNA polymerase II promoter	0.36584	0.263365
YER023W	PRO3	proline biosynthetic process	0.59958	0.6823
YER024W	YAT2	alcohol metabolic process*	0.33987	0.338815
YER027C	GAL83	protein amino acid phosphorylation*	0.35372	0.44636
YER029C	SMB1	nuclear mRNA splicing, via spliceosome	0.36451	0.389165
YER031C	YPT31	vesicle-mediated transport*	0.833815	0.27247
YER033C	ZRG8	biological_process	0.27837	0.26242
YER034W	YER034W	biological_process	0.344895	0.496625
YER035W	EDC2	deadenylation-dependent decapping	0.395375	0.31256
YER036C	ARB1	ribosome biogenesis and assembly*	0.424505	0.715445
YER037W	PHM8	biological_process	0.83462	0.311965
YER039C	HVG1	biological_process	0.81751	0.286995
YER042W	MXR1	response to oxidative stress	0.495995	0.805655
YER047C	SAP1	biological_process	0.49209	0.604415
YER048C	CAJ1	biological_process	0.26737	0.277245
YER048W-A	ISD11	iron-sulfur cluster assembly	0.45347	0.391405
YER050C	RSM18	translation	0.38844	0.462115
YER054C	GIP2	protein amino acid dephosphorylation*	0.400295	0.60732
YER056C-A	RPL34A	translation	0.773325	0.737105
YER057C	HMF1	biological_process	0.52063	0.744805
YER058W	PET117	cytochrome c oxidase complex assembly	0.710825	0.81923
YER059W	PCL6	regulation of glycogen biosynthetic process*	0.34115	0.605415
YER060W	FCY21	biological_process	0.3028	0.497635
YER061C	CEM1	fatty acid biosynthetic process	0.62457	0.69435
YER062C	HOR2	response to osmotic stress*	0.5087	0.66041
YER063W	THO1	transcription, DNA-dependent	0.55147	0.29124
YER064C	YER064C	regulation of transcription	0.42788	0.48533
YER066C-A	#N/A	#N/A	0.606215	0.690045
YER066W	YER066W	biological_process	0.613925	0.569855
YER067W	YER067W	biological_process	0.84199	0.342705
YER070W	RNR1	telomere maintenance*	0.62272	0.56229
YER071C	YER071C	biological_process	0.520375	0.53836
YER072W	VTC1	vacuole fusion, non-autophagic	0.412525	0.49308
YER073W	ALD5	electron transport*	0.676005	0.54814
YER074W	RPS24A	translation	0.17686	0.4569
YER077C	YER077C	biological_process	0.55505	0.65919
YER079W	YER079W	biological_process	0.370995	0.65257
YER080W	FMP29	biological_process	0.492275	0.230585
YER082C	UTP7	ribosome biogenesis and assembly*	0.51868	0.833395
YER083C	GET2	cell wall organization and biogenesis*	0.54138	0.434715
YER084W	#N/A	#N/A	0.67406	0.13193
YER085C	YER085C	biological_process	0.42496	0.47926
YER087C-A	#N/A	#N/A	0.604785	0.381245
YER087W	YER087W	biological_process	0.93372	0.71058
YER089C	PTC2	G1/S transition of mitotic cell cycle*	0.45575	0.46481
YER090W	TRP2	tryptophan biosynthetic process	0.33	0.6387
YER091C	MET6	methionine biosynthetic process	0.507275	0.459115
YER091C-A	#N/A	#N/A	0.40005	0.46223
YER092W	IES5	biological_process	0.328095	0.70625
YER093C-A	YER093C-A	biological_process	0.485975	0.499745
YER094C	PUP3	ubiquitin-dependent protein catabolic process	0.444655	0.881525
YER095W	RAD51	meiotic recombination*	0.55147	0.55242
YER096W	SHC1	sporulation (sensu Fungi)*	0.568415	0.36047
YER097W	#N/A	#N/A	0.22798	0.460115
YER098W	UBP9	protein deubiquitination	0.32238	0.32971
YER099C	PRS2	histidine biosynthetic process*	0.550225	0.621035
YER100W	UBC6	ER-associated protein catabolic process*	0.571405	0.701925
YER101C	AST2	biological_process	0.98091	0.945605
YER106W	MAM1	meiotic chromosome segregation	0.254445	0.40064
YER107C	GLE2	mRNA export from nucleus*	0.20995	0.518365
YER109C	FLO8	pseudohyphal growth*	0.80735	0.80192
YER112W	LSM4	nuclear mRNA splicing, via spliceosome*	0.4388	0.54312
YER113C	TMN3	biological_process	0.53467	0.535515
YER116C	SLX8	telomere maintenance*	0.691425	0.34483
YER117W	RPL23B	translation*	0.40401	0.52601
YER118C	SHO1	pseudohyphal growth*	0.42061	0.69833
YER119C	AVT6	amino acid export from vacuole	0.59202	0.6486
YER119C-A	#N/A	#N/A	0.48869	0.41121
YER120W	SCS2	chromatin silencing at telomere*	0.386055	0.71505
YER121W	YER121W	biological_process	0.61892	0.492075
YER122C	GLO3	ER to Golgi vesicle-mediated transport*	0.826325	0.90983
YER124C	DSE1	cell wall organization and biogenesis	0.310945	0.16464
YER125W	RSP5	endocytosis*	0.97034	0.97524
YER126C	NSA2	ribosome biogenesis and assembly*	0.251345	0.54779
YER127W	LCP5	ribosome biogenesis and assembly*	0.519825	0.67642
YER131W	RPS26B	translation	0.52684	0.66084
YER133W	GLC7	35S primary transcript processing*	0.68412	0.44279
YER134C	YER134C	biological_process	0.898115	0.802265
YER135C	#N/A	#N/A	0.50867	0.782275
YER138W-A	YER138W-A	biological_process	0.416325	0.22315
YER139C	YER139C	biological_process	0.770415	0.84733
YER141W	COX15	heme a biosynthetic process	0.676175	0.529855
YER142C	MAG1	DNA dealkylation	0.83	0.872495
YER143W	DDI1	ubiquitin-dependent protein catabolic process*	0.88478	0.7129
YER144C	UBP5	protein deubiquitination	0.55117	0.728995
YER145C	FTR1	high affinity iron ion transport	0.46196	0.647365
YER146W	LSM5	nuclear mRNA splicing, via spliceosome*	0.538005	0.514625
YER148W	SPT15	transcription from RNA polymerase II promoter*	0.873605	0.987045
YER150W	SPI1	biological_process	0.71586	0.45233
YER151C	UBP3	response to drug*	0.72154	0.828475
YER152C	YER152C	biological_process	0.60665	0.78413
YER153C	PET122	translation	0.450295	0.647425
YER154W	OXA1	protein insertion into mitochondrial membrane from inner side	0.691745	0.56297
YER156C	YER156C	biological_process	0.91668	0.887295
YER157W	COG3	ER to Golgi vesicle-mediated transport*	0.30766	0.50497
YER159C	BUR6	positive regulation of transcription from RNA polymerase II promoter*	0.660625	0.5248
YER163C	YER163C	biological_process	0.95286	0.919345
YER165W	PAB1	regulation of translational initiation	0.430725	0.48099
YER167W	BCK2	G1/S transition of mitotic cell cycle*	0.280365	0.265075
YER168C	CCA1	tRNA modification	0.431695	0.465245
YER170W	ADK2	nucleotide metabolic process	0.229675	0.311815
YER171W	RAD3	transcription initiation from RNA polymerase II promoter*	0.3988	0.18291
YER174C	GRX4	response to oxidative stress*	0.449305	0.34124
YER175C	TMT1	biological_process	0.3652	0.60303
YER177W	BMH1	sporulation (sensu Fungi)*	0.60027	0.490935
YER179W	DMC1	meiosis*	0.642035	0.529705
YER180C	ISC10	sporulation	0.3665	0.23876
YER181C	#N/A	#N/A	0.337485	0.26193
YER182W	FMP10	biological_process	0.155335	0.37177
YER184C	YER184C	biological_process	0.020065	0.188415
YER185W	YER185W	biological_process	0.44544	0.52086
YER187W	YER187W	biological_process	0.460295	0.58273
YER188W	#N/A	#N/A	0.44377	0.37874
YFL001W	DEG1	RNA processing	0.922025	0.937635
YFL003C	MSH4	meiotic recombination	0.37679	0.251885
YFL004W	VTC2	vacuole fusion, non-autophagic*	0.29442	0.560525
YFL005W	SEC4	cytokinesis*	0.594405	0.751275
YFL006W	#N/A	#N/A	0.54988	0.568955
YFL007W	BLM10	protein catabolic process*	0.20218	0.30766
YFL010C	WWM1	biological_process	0.388795	0.44579
YFL011W	HXT10	hexose transport	0.826015	0.446555
YFL013W-A	#N/A	#N/A	0.65606	0.300985
YFL014W	HSP12	response to oxidative stress*	0.38427	0.308245
YFL015C	#N/A	#N/A	0.511965	0.41537
YFL017C	GNA1	UDP-N-acetylglucosamine biosynthetic process	0.329965	0.189295
YFL018C	LPD1	glycine catabolic process*	0.50413	0.560525
YFL019C	#N/A	#N/A	0.531235	0.501175
YFL020C	PAU5	biological_process	0.238415	0.44177
YFL022C	FRS2	phenylalanyl-tRNA aminoacylation	0.455395	0.669165
YFL023W	BUD27	cellular bud site selection	0.546395	0.706305
YFL025C	BST1	ER to Golgi vesicle-mediated transport*	0.44287	0.38337
YFL028C	CAF16	regulation of transcription, DNA-dependent	0.424605	0.78711
YFL029C	CAK1	protein amino acid phosphorylation*	0.417895	0.48206
YFL030W	AGX1	glycine biosynthetic process, by transamination of glyoxylate	0.62715	0.67708
YFL031W	HAC1	regulation of transcription from RNA polymerase II promoter*	0.382585	0.607225
YFL032W	#N/A	#N/A	0.495765	0.459115
YFL034C-A	RPL22B	translation	0.707685	0.338795
YFL034W	YFL034W	biological_process	0.68253	0.394855
YFL038C	YPT1	ER to Golgi vesicle-mediated transport*	0.63982	0.62008
YFL040W	YFL040W	biological_process	0.873945	0.32142
YFL041W	FET5	iron ion transport	0.57231	0.419315
YFL045C	SEC53	protein targeting to ER	0.635855	0.593475
YFL046W	FMP32	biological_process	0.298745	0.392765
YFL047W	RGD2	small GTPase mediated signal transduction	0.62478	0.59115
YFL048C	EMP47	ER to Golgi vesicle-mediated transport	0.511475	0.2553
YFL051C	YFL051C	biological_process	0.37679	0.46058
YFL052W	YFL052W	biological_process	0.479225	0.356905
YFL054C	YFL054C	water transport	0.68392	0.56019
YFL055W	AGP3	amino acid transport	0.515645	0.420995
YFL056C	AAD6	response to toxin*	0.44333	0.384685
YFL057C	AAD16	response to toxin*	0.55123	0.32825
YFL058W	THI5	thiamin biosynthetic process	0.704745	0.706455
YFL059W	SNZ3	thiamin biosynthetic process*	0.33408	0.55536
YFL062W	COS4	biological_process	0.71993	0.41555
YFL063W	#N/A	#N/A	0.536435	0.17086
YFR002W	NIC96	mRNA export from nucleus*	0.63417	0.272405
YFR004W	RPN11	ubiquitin-dependent protein catabolic process	0.42523	0.54694
YFR005C	SAD1	nuclear mRNA splicing, via spliceosome	0.82132	0.67091
YFR007W	YFR007W	biological_process	0.590745	0.428285
YFR008W	FAR7	cell cycle arrest in response to pheromone	0.446915	0.633915
YFR009W	GCN20	regulation of translational elongation	0.47653	0.481375
YFR010W	UBP6	protein deubiquitination	0.982045	0.957725
YFR011C	YFR011C	biological_process	0.427275	0.585995
YFR014C	CMK1	protein amino acid phosphorylation*	0.78384	0.544405
YFR015C	GSY1	glycogen biosynthetic process	0.59232	0.61296
YFR017C	YFR017C	biological_process	0.69407	0.78972
YFR018C	YFR018C	biological_process	0.66011	0.604485
YFR020W	#N/A	#N/A	0.469125	0.66066
YFR021W	ATG18	sporulation (sensu Fungi)*	0.510125	0.563335
YFR024C	#N/A	#N/A	0.416485	0.52721
YFR025C	HIS2	histidine biosynthetic process	0.31793	0.49497
YFR026C	YFR026C	biological_process	0.76228	0.85899
YFR027W	ECO1	DNA repair*	0.287705	0.639665
YFR029W	PTR3	response to amino acid stimulus	0.64244	0.793515
YFR032C	YFR032C	biological_process	0.31412	0.618235
YFR032C-A	RPL29	translation	0.49904	0.483795
YFR033C	QCR6	aerobic respiration*	0.58322	0.67868
YFR034C	PHO4	phosphate metabolic process*	0.74364	0.95594
YFR035C	YFR035C	biological_process	0.719115	0.775965
YFR036W	CDC26	mitotic sister chromatid segregation*	0.616555	0.801345
YFR037C	RSC8	RNA elongation from RNA polymerase II promoter*	0.0898	0.367605
YFR038W	IRC5	biological_process	0.368205	0.533685
YFR039C	YFR039C	biological_process	0.581865	0.89343
YFR040W	SAP155	G1/S transition of mitotic cell cycle	0.521755	0.43627
YFR041C	ERJ5	telomere maintenance*	0.71044	0.552785
YFR042W	KEG1	biological_process	0.896465	0.812045
YFR043C	IRC6	biological_process	0.64944	0.51957
YFR048W	RMD8	response to drug	0.48037	0.41808
YFR049W	YMR31	translation	0.46937	0.479845
YFR050C	PRE4	ubiquitin-dependent protein catabolic process	0.571095	0.626405
YFR051C	RET2	ER to Golgi vesicle-mediated transport*	0.6402	0.426795
YFR052W	RPN12	ubiquitin-dependent protein catabolic process	0.43628	0.32925
YFR053C	HXK1	glycolysis*	0.88932	0.836395
YFR056C	#N/A	#N/A	0.361135	0.669185
YFR057W	YFR057W	biological_process	0.515645	0.331355
YGL001C	ERG26	ergosterol biosynthetic process	0.42511	0.617735
YGL003C	CDH1	telomere maintenance*	0.522465	0.398445
YGL005C	COG7	intra-Golgi vesicle-mediated transport	0.196385	0.608865
YGL006W	PMC1	calcium ion homeostasis*	0.204405	0.2653
YGL007W	#N/A	#N/A	0.353605	0.442615
YGL010W	YGL010W	biological_process	0.75135	0.71865
YGL011C	SCL1	ubiquitin-dependent protein catabolic process	0.542945	0.504465
YGL014W	PUF4	mRNA catabolic process*	0.3471	0.356675
YGL015C	YGL015C	biological_process	0.334485	0.4266
YGL017W	ATE1	protein modification process*	0.344385	0.37101
YGL018C	JAC1	aerobic respiration*	0.61958	0.321315
YGL019W	CKB1	protein amino acid phosphorylation*	0.60008	0.542725
YGL020C	GET1	mitochondrion organization and biogenesis*	0.27035	0.284175
YGL021W	ALK1	protein amino acid phosphorylation*	0.94533	0.584715
YGL023C	PIB2	vesicle-mediated transport	0.34199	0.471175
YGL024W	#N/A	#N/A	0.593775	0.50328
YGL025C	PGD1	telomere maintenance*	0.46956	0.41448
YGL027C	CWH41	cell wall organization and biogenesis*	0.78037	0.66021
YGL028C	SCW11	cytokinesis, completion of separation	0.508145	0.48407
YGL029W	CGR1	ribosome biogenesis and assembly*	0.338365	0.33523
YGL030W	RPL30	translation*	0.171485	0.43891
YGL031C	RPL24A	translation	0.235045	0.371285
YGL032C	AGA2	agglutination during conjugation with cellular fusion	0.182095	0.46403
YGL034C	#N/A	#N/A	0.41527	0.596645
YGL035C	MIG1	negative regulation of transcription from RNA polymerase II promoter by glucose	0.308195	0.48633
YGL037C	PNC1	chromatin silencing at telomere*	0.256	0.37892
YGL038C	OCH1	protein amino acid N-linked glycosylation	0.401805	0.31363
YGL039W	YGL039W	telomere maintenance	0.44627	0.491195
YGL041C	#N/A	#N/A	0.28308	0.404425
YGL042C	#N/A	#N/A	0.199605	0.367605
YGL043W	DST1	RNA elongation from RNA polymerase II promoter*	0.86573	0.827915
YGL044C	RNA15	mRNA cleavage*	0.279665	0.411945
YGL045W	RIM8	meiosis*	0.207805	0.276695
YGL046W	#N/A	#N/A	0.36745	0.382265
YGL047W	ALG13	dolichol-linked oligosaccharide biosynthetic process	0.42748	0.67294
YGL048C	RPT6	ubiquitin-dependent protein catabolic process	0.419385	0.379535
YGL050W	TYW3	wybutosine biosynthetic process	0.635855	0.71067
YGL051W	MST27	vesicle organization and biogenesis	0.8438	0.892035
YGL052W	#N/A	#N/A	0.187995	0.43396
YGL053W	PRM8	conjugation with cellular fusion*	0.683185	0.58903
YGL054C	ERV14	ER to Golgi vesicle-mediated transport*	0.305895	0.550485
YGL055W	OLE1	mitochondrion inheritance*	0.94021	0.868985
YGL056C	SDS23	biological_process	0.496265	0.47926
YGL057C	YGL057C	biological_process	0.29995	0.4266
YGL058W	RAD6	telomere maintenance*	0.55822	0.497995
YGL059W	YGL059W	biological_process	0.409615	0.18812
YGL061C	DUO1	mitotic spindle organization and biogenesis in nucleus*	0.787765	0.496075
YGL062W	PYC1	gluconeogenesis*	0.6348	0.67711
YGL064C	MRH4	ribosome biogenesis and assembly	0.11824	0.22545
YGL066W	SGF73	histone acetylation*	0.49371	0.19136
YGL067W	NPY1	NADH metabolic process	0.492425	0.69052
YGL068W	MNP1	translation*	0.30155	0.593
YGL069C	#N/A	#N/A	0.36917	0.3038
YGL070C	RPB9	telomere maintenance*	0.33985	0.41366
YGL071W	AFT1	positive regulation of transcription from RNA polymerase II promoter*	0.24152	0.32347
YGL073W	HSF1	regulation of transcription from RNA polymerase II promoter*	0.106875	0.43377
YGL074C	#N/A	#N/A	0.651685	0.26499
YGL075C	MPS2	spindle pole body duplication in nuclear envelope*	0.485945	0.51721
YGL076C	RPL7A	translation	0.712755	0.33748
YGL077C	HNM1	choline transport	0.49859	0.45289
YGL078C	DBP3	35S primary transcript processing*	0.4894	0.66013
YGL079W	YGL079W	biological_process	0.188215	0.39084
YGL080W	FMP37	biological_process	0.95361	0.68479
YGL081W	YGL081W	biological_process	0.33746	0.318505
YGL082W	YGL082W	biological_process	0.407785	0.636365
YGL084C	GUP1	telomere maintenance*	0.144595	0.58163
YGL085W	YGL085W	biological_process	0.10781	0.373275
YGL087C	MMS2	response to DNA damage stimulus*	0.598525	0.50232
YGL088W	#N/A	#N/A	0.416325	0.528025
YGL089C	MF(ALPHA)2	pheromone-dependent signal transduction during conjugation with cellular fusion	0.36089	0.31109
YGL091C	NBP35	iron-sulfur cluster assembly	0.71782	0.688975
YGL094C	PAN2	postreplication repair*	0.406485	0.519205
YGL095C	VPS45	protein complex assembly*	0.771705	0.31256
YGL096W	TOS8	G1/S-specific transcription in mitotic cell cycle	0.164875	0.161
YGL098W	USE1	ER to Golgi vesicle-mediated transport*	0.12207	0.220775
YGL099W	LSG1	ribosome biogenesis and assembly*	0.38427	0.26266
YGL100W	SEH1	mRNA export from nucleus*	0.5323	0.4784
YGL101W	YGL101W	biological_process	0.759455	0.531835
YGL102C	#N/A	#N/A	0.50179	0.51678
YGL104C	VPS73	protein targeting to vacuole	0.96964	0.48215
YGL105W	ARC1	tRNA export from nucleus*	0.80222	0.86376
YGL106W	MLC1	cytokinesis*	0.24903	0.409285
YGL108C	YGL108C	biological_process	0.409715	0.22125
YGL109W	#N/A	#N/A	0.327215	0.41274
YGL114W	YGL114W	transport	0.53955	0.541085
YGL116W	CDC20	mitotic sister chromatid segregation*	0.30016	0.38735
YGL117W	YGL117W	biological_process	0.330595	0.29896
YGL118C	#N/A	#N/A	0.45928	0.19763
YGL119W	ABC1	aerobic respiration*	0.310175	0.46472
YGL121C	GPG1	signal transduction	0.59589	0.560705
YGL122C	NAB2	mRNA polyadenylation*	0.95481	0.81558
YGL123W	RPS2	translation*	0.20578	0.385795
YGL124C	MON1	protein targeting to vacuole*	0.40893	0.56076
YGL126W	SCS3	phospholipid metabolic process	0.645025	0.5732
YGL127C	SOH1	telomere maintenance*	0.155375	0.18697
YGL130W	CEG1	positive regulation of transcription from RNA polymerase II promoter*	0.51899	0.477675
YGL132W	#N/A	#N/A	0.361135	0.47954
YGL134W	PCL10	regulation of glycogen biosynthetic process*	0.282625	0.3306
YGL135W	RPL1B	translation*	0.73015	0.166015
YGL136C	MRM2	telomere maintenance*	0.57041	0.11032
YGL137W	SEC27	ER to Golgi vesicle-mediated transport*	0.164875	0.25226
YGL139W	FLC3	FAD transport	0.80696	0.25298
YGL141W	HUL5	protein monoubiquitination*	0.24172	0.20145
YGL142C	GPI10	GPI anchor biosynthetic process	0.315325	0.35387
YGL143C	MRF1	translation*	0.52646	0.573845
YGL144C	ROG1	lipid metabolic process	0.4421	0.3223
YGL145W	TIP20	retrograde vesicle-mediated transport, Golgi to ER	0.611545	0.671375
YGL147C	RPL9A	translation	0.18151	0.29431
YGL148W	ARO2	aromatic amino acid family biosynthetic process	0.854155	0.806285
YGL149W	#N/A	#N/A	0.16862	0.42054
YGL152C	#N/A	#N/A	0.54976	0.67211
YGL154C	LYS5	lysine biosynthetic process via aminoadipic acid*	0.54259	0.478625
YGL155W	CDC43	establishment of cell polarity (sensu Fungi)*	0.70165	0.240225
YGL158W	RCK1	protein amino acid phosphorylation*	0.437685	0.378325
YGL159W	YGL159W	biological_process	0.485785	0.60773
YGL160W	YGL160W	biological_process	0.51135	0.525795
YGL161C	YIP5	vesicle-mediated transport	0.49912	0.28073
YGL162W	SUT1	regulation of transcription from RNA polymerase II promoter*	0.17865	0.110715
YGL166W	CUP2	transcription initiation from RNA polymerase II promoter*	0.43117	0.37224
YGL168W	HUR1	telomere maintenance*	0.28371	0.2007
YGL169W	SUA5	aerobic respiration	0.660175	0.717005
YGL172W	NUP49	mRNA export from nucleus*	0.674085	0.600395
YGL174W	BUD13	nuclear mRNA splicing, via spliceosome*	0.65987	0.76879
YGL176C	YGL176C	biological_process	0.35897	0.631435
YGL177W	#N/A	#N/A	0.60585	0.59454
YGL180W	ATG1	autophagy*	0.40003	0.747525
YGL181W	GTS1	sporulation (sensu Fungi)*	0.465975	0.4331
YGL182C	#N/A	#N/A	0.135095	0.4263
YGL183C	MND1	meiotic recombination	0.27486	0.544115
YGL184C	STR3	methionine biosynthetic process	0.999535	0.951365
YGL185C	YGL185C	metabolic process	0.70946	0.663325
YGL186C	TPN1	vitamin transport	0.68587	0.354425
YGL187C	COX4	aerobic respiration*	0.272205	0.392995
YGL188C	#N/A	#N/A	0.518255	0.230585
YGL190C	CDC55	translation*	0.642225	0.73281
YGL191W	COX13	aerobic respiration	0.384415	0.42618
YGL193C	YGL193C	biological_process	0.09927	0.265965
YGL196W	YGL196W	biological_process	0.630525	0.179635
YGL198W	YIP4	vesicle-mediated transport	0.26457	0.3657
YGL199C	#N/A	#N/A	0.33178	0.301425
YGL200C	EMP24	ER to Golgi vesicle-mediated transport*	0.22548	0.167315
YGL204C	#N/A	#N/A	0.49588	0.468995
YGL205W	POX1	fatty acid beta-oxidation	0.68176	0.67211
YGL207W	SPT16	RNA elongation from RNA polymerase II promoter*	0.838385	0.890135
YGL208W	SIP2	protein amino acid phosphorylation*	0.870695	0.58759
YGL209W	MIG2	negative regulation of transcription from RNA polymerase II promoter by glucose	0.521025	0.42065
YGL210W	YPT32	vesicle-mediated transport*	0.61065	0.7908
YGL211W	NCS6	response to drug*	0.540185	0.362545
YGL213C	SKI8	protein complex assembly*	0.39368	0.568515
YGL214W	#N/A	#N/A	0.59295	0.639855
YGL215W	CLG1	cell cycle	0.40626	0.341295
YGL217C	#N/A	#N/A	0.38288	0.46373
YGL218W	#N/A	#N/A	0.18858	0.49472
YGL219C	MDM34	mitochondrion organization and biogenesis	0.66595	0.555185
YGL220W	YGL220W	biological_process	0.27115	0.43636
YGL221C	NIF3	biological_process	0.507515	0.61612
YGL223C	COG1	intra-Golgi vesicle-mediated transport*	0.460645	0.39242
YGL225W	VRG4	protein amino acid N-linked glycosylation*	0.318795	0.32633
YGL226C-A	OST5	protein amino acid N-linked glycosylation	0.458815	0.37133
YGL226W	YGL226W	biological_process	0.37622	0.416955
YGL230C	YGL230C	biological_process	0.432685	0.52799
YGL231C	YGL231C	biological_process	0.201785	0.51528
YGL233W	SEC15	cytokinesis*	0.57988	0.636975
YGL234W	ADE5,7	'de novo' IMP biosynthetic process*	0.553335	0.753185
YGL235W	YGL235W	biological_process	0.402975	0.274025
YGL240W	DOC1	mitotic sister chromatid segregation*	0.280615	0.31204
YGL242C	YGL242C	biological_process	0.39837	0.43891
YGL245W	GUS1	glutamyl-tRNA aminoacylation	0.71367	0.76513
YGL246C	RAI1	processing of 27S pre-rRNA*	0.682315	0.47356
YGL247W	BRR6	mRNA export from nucleus*	0.393505	0.355765
YGL248W	PDE1	cAMP-mediated signaling	0.178705	0.37013
YGL250W	RMR1	biological_process	0.480405	0.39679
YGL252C	RTG2	mitochondrial signaling pathway*	0.317335	0.440195
YGL254W	FZF1	positive regulation of transcription from RNA polymerase II promoter*	0.621175	0.59898
YGL255W	ZRT1	high-affinity zinc ion transport	0.197335	0.47608
YGL256W	ADH4	NADH oxidation*	0.54223	0.637475
YGL259W	YPS5	biological_process	0.46988	0.583305
YGL262W	YGL262W	biological_process	0.17945	0.33487
YGL263W	COS12	biological_process	0.532725	0.60004
YGR001C	AML1	biological_process	0.43471	0.664945
YGR002C	SWC4	DNA repair*	0.54223	0.473885
YGR003W	CUL3	ubiquitin-dependent protein catabolic process*	0.37132	0.511905
YGR005C	TFG2	transcription initiation from RNA polymerase II promoter	0.15936	0.531665
YGR006W	PRP18	nuclear mRNA splicing, via spliceosome*	0.372105	0.33785
YGR008C	STF2	ATP synthesis coupled proton transport*	0.46888	0.63099
YGR010W	NMA2	NAD metabolic process	0.419795	0.921915
YGR011W	#N/A	#N/A	0.644545	0.384025
YGR012W	YGR012W	biological_process	0.791725	0.65257
YGR013W	SNU71	nuclear mRNA splicing, via spliceosome	0.162445	0.380965
YGR014W	MSB2	establishment of cell polarity (sensu Fungi)*	0.309715	0.21731
YGR015C	YGR015C	biological_process	0.569485	0.47675
YGR016W	YGR016W	biological_process	0.36304	0.513075
YGR017W	YGR017W	biological_process	0.37539	0.475105
YGR018C	#N/A	#N/A	0.572375	0.40915
YGR020C	VMA7	vacuolar acidification	0.32452	0.621495
YGR021W	YGR021W	biological_process	0.74273	0.67793
YGR022C	#N/A	#N/A	0.27954	0.609545
YGR024C	THG1	tRNA modification	0.92239	0.937925
YGR025W	#N/A	#N/A	0.12157	0.306865
YGR026W	YGR026W	biological_process	0.835875	0.738115
YGR027C	RPS25A	translation	0.53	0.502115
YGR027W-A	#N/A	#N/A	0.894125	0.462445
YGR028W	MSP1	protein targeting to mitochondrion	0.811625	0.7475
YGR029W	ERV1	response to oxidative stress*	0.214705	0.29928
YGR030C	POP6	rRNA processing*	0.6213	0.32442
YGR031W	YGR031W	biological_process	0.124	0.40178
YGR032W	GSC2	cell wall organization and biogenesis*	0.297065	0.5067
YGR034W	RPL26B	translation	0.19995	0.4981
YGR035C	YGR035C	biological_process	0.39126	0.524425
YGR036C	CAX4	telomere maintenance*	0.89297	0.63287
YGR037C	ACB1	fatty acid metabolic process*	0.51272	0.46918
YGR038C-B	#N/A	#N/A	0.65819	0.60142
YGR038W	ORM1	response to unfolded protein	0.55227	0.538435
YGR039W	#N/A	#N/A	0.29463	0.43226
YGR040W	KSS1	invasive growth (sensu Saccharomyces)*	0.65427	0.15703
YGR043C	NQM1	biological_process	0.615405	0.801785
YGR044C	RME1	meiosis*	0.39684	0.32633
YGR045C	#N/A	#N/A	0.328505	0.50051
YGR049W	SCM4	cell cycle	0.469345	0.24352
YGR051C	#N/A	#N/A	0.17204	0.35623
YGR055W	MUP1	sulfur amino acid transport	0.497175	0.512675
YGR058W	PEF1	biological_process	0.40474	0.443885
YGR060W	ERG25	ergosterol biosynthetic process	0.59233	0.523135
YGR061C	ADE6	'de novo' IMP biosynthetic process*	0.178705	0.18631
YGR062C	COX18	cytochrome c oxidase complex assembly	0.42751	0.512555
YGR063C	SPT4	RNA elongation from RNA polymerase II promoter*	0.389505	0.59394
YGR064W	#N/A	#N/A	0.442405	0.471105
YGR066C	YGR066C	biological_process	0.21405	0.395425
YGR068C	YGR068C	biological_process	0.499765	0.424255
YGR069W	#N/A	#N/A	0.2886	0.50909
YGR073C	#N/A	#N/A	0.319725	0.531665
YGR074W	SMD1	nuclear mRNA splicing, via spliceosome	0.31811	0.52721
YGR075C	PRP38	nuclear mRNA splicing, via spliceosome	0.53047	0.500305
YGR077C	PEX8	peroxisome organization and biogenesis*	0.44793	0.500155
YGR078C	PAC10	tubulin folding	0.445615	0.535555
YGR080W	TWF1	bipolar cellular bud site selection*	0.779955	0.862535
YGR082W	TOM20	protein import into mitochondrial matrix	0.36322	0.470865
YGR083C	GCD2	regulation of translational initiation	0.49701	0.500665
YGR085C	RPL11B	translation*	0.44952	0.585025
YGR087C	PDC6	ethanol metabolic process	0.4018	0.386295
YGR089W	NNF2	chromosome segregation	0.490515	0.34372
YGR090W	UTP22	35S primary transcript processing	0.09002	0.28735
YGR091W	PRP31	nuclear mRNA splicing, via spliceosome	0.265505	0.647725
YGR094W	VAS1	valyl-tRNA aminoacylation	0.34634	0.372775
YGR096W	TPC1	thiamin pyrophosphate transport	0.472875	0.51354
YGR097W	ASK10	response to oxidative stress*	0.078155	0.22449
YGR099W	TEL2	telomere maintenance via telomerase	0.14151	0.364045
YGR100W	MDR1	intracellular protein transport	0.39724	0.511065
YGR101W	PCP1	telomere maintenance*	0.24172	0.33523
YGR102C	YGR102C	biological_process	0.35702	0.439415
YGR104C	SRB5	telomere maintenance*	0.24549	0.342835
YGR105W	VMA21	protein complex assembly	0.43573	0.531525
YGR106C	YGR106C	biological_process	0.339045	0.501705
YGR107W	#N/A	#N/A	0.223665	0.363295
YGR109W-B	#N/A	#N/A	0.40746	0.31282
YGR110W	YGR110W	biological_process	0.21073	0.28762
YGR111W	YGR111W	regulation of cell size	0.741125	0.748835
YGR114C	#N/A	#N/A	0.23758	0.21807
YGR116W	SPT6	RNA elongation from RNA polymerase II promoter*	0.24974	0.396935
YGR117C	YGR117C	biological_process	0.35742	0.35473
YGR119C	NUP57	mRNA export from nucleus*	0.67406	0.433695
YGR122W	YGR122W	negative regulation of transcription from RNA polymerase II promoter	0.38427	0.56091
YGR124W	ASN2	asparagine biosynthetic process	0.443605	0.620895
YGR126W	YGR126W	biological_process	0.435135	0.789345
YGR128C	UTP8	ribosome biogenesis and assembly*	0.23592	0.091435
YGR129W	SYF2	nuclear mRNA splicing, via spliceosome*	0.29005	0.520335
YGR130C	YGR130C	biological_process	0.87303	0.822205
YGR131W	YGR131W	biological_process	0.597185	0.4979
YGR132C	PHB1	protein folding*	0.234535	0.44579
YGR133W	PEX4	peroxisome organization and biogenesis*	0.46348	0.573585
YGR135W	PRE9	ubiquitin-dependent protein catabolic process*	0.61426	0.726975
YGR136W	LSB1	biological_process	0.416555	0.543265
YGR137W	#N/A	#N/A	0.23509	0.400925
YGR139W	#N/A	#N/A	0.33274	0.411455
YGR143W	SKN1	cell wall organization and biogenesis*	0.42369	0.2149
YGR144W	THI4	mitochondrial genome maintenance*	0.66837	0.68732
YGR145W	ENP2	ribosome biogenesis and assembly*	0.492955	0.525315
YGR151C	#N/A	#N/A	0.489565	0.214745
YGR153W	YGR153W	biological_process	0.57719	0.341295
YGR154C	GTO1	glutathione metabolic process	0.52871	0.346595
YGR155W	CYS4	response to drug*	0.583345	0.362615
YGR156W	PTI1	mRNA cleavage*	0.50172	0.58973
YGR157W	CHO2	telomere maintenance*	0.95257	0.558875
YGR158C	MTR3	35S primary transcript processing*	0.517125	0.494055
YGR159C	NSR1	telomere maintenance*	0.525055	0.538285
YGR161C	RTS3	protein amino acid dephosphorylation	0.507085	0.419075
YGR161W-A	#N/A	#N/A	0.61003	0.52997
YGR163W	GTR2	telomere maintenance*	0.46988	0.37841
YGR165W	MRPS35	translation*	0.32934	0.41429
YGR167W	CLC1	endocytosis*	0.347055	0.47783
YGR168C	YGR168C	biological_process	0.13168	0.248675
YGR170W	PSD2	phosphatidylcholine biosynthetic process	0.62811	0.509915
YGR172C	YIP1	ER to Golgi vesicle-mediated transport*	0.2585	0.470865
YGR173W	RBG2	biological_process	0.11086	0.22438
YGR174C	CBP4	protein complex assembly	0.580325	0.394775
YGR177C	ATF2	steroid metabolic process	0.26672	0.409815
YGR178C	PBP1	mRNA polyadenylation*	0.3209	0.2988
YGR179C	OKP1	chromosome segregation	0.455645	0.161775
YGR180C	RNR4	DNA replication*	0.59902	0.507745
YGR181W	TIM13	protein import into mitochondrial inner membrane	0.43217	0.8778
YGR183C	QCR9	aerobic respiration*	0.47687	0.3299
YGR187C	HGH1	ribosome biogenesis and assembly	0.955655	0.6325
YGR188C	BUB1	protein amino acid phosphorylation*	0.313995	0.481375
YGR191W	HIP1	manganese ion transport*	0.327215	0.516205
YGR192C	TDH3	glycolysis*	0.774995	0.53836
YGR193C	PDX1	acetyl-CoA biosynthetic process from pyruvate	0.48966	0.42331
YGR196C	FYV8	biological_process	0.975095	0.64226
YGR197C	SNG1	response to drug	0.60573	0.14687
YGR198W	YPP1	MAPKKK cascade	0.559745	0.539835
YGR199W	PMT6	protein amino acid O-linked glycosylation	0.587635	0.497215
YGR200C	ELP2	regulation of transcription from RNA polymerase II promoter*	0.469485	0.476815
YGR203W	YGR203W	biological_process	0.757915	0.366755
YGR205W	YGR205W	biological_process	0.64473	0.485535
YGR206W	MVB12	protein targeting to vacuole	0.49158	0.645615
YGR207C	YGR207C	biological_process	0.250085	0.164935
YGR208W	SER2	serine family amino acid biosynthetic process	0.727425	0.567805
YGR209C	TRX2	ER to Golgi vesicle-mediated transport*	0.48928	0.57532
YGR215W	RSM27	translation	0.363565	0.165245
YGR218W	CRM1	mRNA export from nucleus*	0.35787	0.375045
YGR221C	TOS2	budding cell bud growth	0.62796	0.503455
YGR222W	PET54	translation*	0.637815	0.67158
YGR223C	HSV2	biological_process	0.88388	0.515025
YGR224W	AZR1	azole transport	0.8903	0.473795
YGR226C	#N/A	#N/A	0.486645	0.405885
YGR227W	DIE2	protein amino acid N-linked glycosylation*	0.79276	0.42161
YGR228W	#N/A	#N/A	0.3125	0.373875
YGR229C	SMI1	telomere maintenance*	0.568215	0.497785
YGR230W	BNS1	meiosis	0.528465	0.46231
YGR231C	PHB2	protein folding*	0.28248	0.338685
YGR233C	PHO81	phosphate metabolic process	0.32384	0.300845
YGR234W	YHB1	response to stress	0.63507	0.28706
YGR235C	YGR235C	biological_process	0.732165	0.639145
YGR236C	SPG1	biological_process	0.387035	0.398445
YGR237C	YGR237C	biological_process	0.46937	0.474805
YGR238C	KEL2	conjugation with cellular fusion*	0.34659	0.55201
YGR239C	PEX21	protein targeting to peroxisome	0.15454	0.309515
YGR240C	PFK1	glycolysis	0.811315	0.774335
YGR241C	YAP1802	endocytosis	0.342	0.416925
YGR242W	#N/A	#N/A	0.386055	0.22085
YGR244C	LSC2	tricarboxylic acid cycle*	0.540935	0.37906
YGR246C	BRF1	transcription initiation from RNA polymerase III promoter	0.33408	0.47573
YGR247W	CPD1	meiosis*	0.54438	0.69209
YGR248W	SOL4	pentose-phosphate shunt, oxidative branch	0.758565	0.41366
YGR249W	MGA1	filamentous growth	0.78914	0.50989
YGR252W	GCN5	histone acetylation*	0.73709	0.59781
YGR255C	COQ6	ubiquinone biosynthetic process	0.48416	0.32971
YGR256W	GND2	pentose-phosphate shunt, oxidative branch	0.546395	0.529325
YGR257C	MTM1	transport*	0.46317	0.63588
YGR258C	RAD2	nucleotide-excision repair*	0.33536	0.185755
YGR259C	#N/A	#N/A	0.278835	0.484575
YGR260W	TNA1	nicotinamide mononucleotide transport	0.477025	0.436305
YGR263C	SAY1	biological_process	0.413505	0.391565
YGR264C	MES1	methionyl-tRNA aminoacylation	0.98254	0.832795
YGR265W	#N/A	#N/A	0.28371	0.1206
YGR266W	YGR266W	biological_process	0.51497	0.54382
YGR267C	FOL2	folic acid and derivative biosynthetic process	0.596625	0.42301
YGR268C	HUA1	actin cortical patch assembly	0.413025	0.25604
YGR272C	YGR272C	35S primary transcript processing	0.34811	0.21238
YGR275W	RTT102	RNA elongation from RNA polymerase II promoter*	0.635855	0.775925
YGR276C	RNH70	RNA processing	0.751695	0.830155
YGR282C	BGL2	cell wall organization and biogenesis	0.57041	0.61113
YGR283C	YGR283C	ribosome biogenesis and assembly	0.322945	0.392705
YGR284C	ERV29	ER to Golgi vesicle-mediated transport	0.315325	0.19424
YGR285C	ZUO1	protein folding*	0.35659	0.38427
YGR286C	BIO2	biotin biosynthetic process	0.631905	0.620045
YGR287C	YGR287C	biological_process	0.34114	0.54676
YGR290W	#N/A	#N/A	0.38655	0.440495
YGR292W	MAL12	maltose catabolic process	0.820655	0.81033
YGR293C	#N/A	#N/A	0.50609	0.530025
YGR294W	PAU12	biological_process	0.217985	0.24456
YHL001W	RPL14B	translation	0.342	0.448435
YHL002W	HSE1	protein targeting to vacuole	0.27656	0.443095
YHL003C	LAG1	replicative cell aging*	0.63522	0.61609
YHL004W	MRP4	translation	0.45928	0.52389
YHL005C	#N/A	#N/A	0.316685	0.25698
YHL006C	SHU1	error-free DNA repair	0.656975	0.70888
YHL007C	STE20	protein amino acid phosphorylation*	0.475295	0.606925
YHL008C	YHL008C	biological_process*	0.21666	0.233645
YHL009C	YAP3	regulation of transcription from RNA polymerase II promoter	0.747835	0.787395
YHL010C	YHL010C	biological_process	0.583345	0.488545
YHL012W	YHL012W	telomere maintenance	0.423005	0.40926
YHL013C	OTU2	biological_process	0.86471	0.90559
YHL015W	RPS20	translation	0.784475	0.66596
YHL016C	DUR3	putrescine transport*	0.33802	0.224445
YHL018W	YHL018W	biological_process	0.706255	0.61415
YHL019C	APM2	vesicle-mediated transport*	0.52717	0.605395
YHL021C	FMP12	biological_process	0.505345	0.65308
YHL022C	SPO11	meiotic DNA double-strand break formation	0.43911	0.495275
YHL024W	RIM4	meiosis*	0.8799	0.78385
YHL025W	SNF6	chromatin remodeling	0.288575	0.33293
YHL029C	OCA5	metabolic process	0.44618	0.315225
YHL031C	GOS1	response to drug*	0.763615	0.82346
YHL033C	RPL8A	translation	0.886695	0.83717
YHL034C	SBP1	35S primary transcript processing	0.60008	0.444805
YHL036W	MUP3	amino acid transport	0.840625	0.21544
YHL037C	#N/A	#N/A	0.31932	0.22033
YHL038C	CBP2	Group I intron splicing	0.586755	0.44636
YHL039W	YHL039W	ribosome biogenesis and assembly	0.44054	0.505745
YHL040C	ARN1	siderophore-iron transport	0.824275	0.649575
YHL041W	#N/A	#N/A	0.32384	0.50358
YHL042W	YHL042W	biological_process	0.474295	0.517545
YHL043W	ECM34	cell wall organization and biogenesis	0.336895	0.636405
YHL044W	YHL044W	biological_process	0.527495	0.35786
YHL045W	#N/A	#N/A	0.434985	0.376745
YHL046C	PAU13	biological_process	0.3516	0.60004
YHL047C	ARN2	iron ion homeostasis*	0.73586	0.289575
YHL048W	COS8	response to unfolded protein	0.845145	0.695295
YHR001W	OSH7	endocytosis*	0.49243	0.612965
YHR002W	LEU5	coenzyme A transport	0.53	0.59404
YHR003C	YHR003C	biological_process	0.513585	0.65308
YHR004C	NEM1	sporulation (sensu Fungi)*	0.50474	0.56945
YHR005C	GPA1	response to drug*	0.57782	0.628005
YHR005C-A	MRS11	protein import into mitochondrial inner membrane	0.77457	0.859475
YHR008C	SOD2	replicative cell aging*	0.67343	0.78032
YHR009C	YHR009C	biological_process	0.42247	0.78214
YHR011W	DIA4	aerobic respiration*	0.77838	0.60761
YHR012W	VPS29	retrograde transport, endosome to Golgi	0.749535	0.840625
YHR013C	ARD1	telomere maintenance*	0.6783	0.475485
YHR014W	SPO13	positive regulation of sister chromatid cohesion*	0.45316	0.38863
YHR015W	MIP6	mRNA export from nucleus	0.394145	0.300985
YHR017W	YSC83	biological_process	0.410995	0.59404
YHR018C	ARG4	arginine biosynthetic process	0.42369	0.655915
YHR022C	YHR022C	biological_process	0.709325	0.46528
YHR025W	THR1	methionine metabolic process*	0.723785	0.68521
YHR026W	PPA1	response to drug*	0.56069	0.582565
YHR027C	RPN1	ubiquitin-dependent protein catabolic process	0.21405	0.30094
YHR028C	DAP2	protein processing	0.560145	0.576815
YHR030C	SLT2	cell wall organization and biogenesis*	0.48126	0.32142
YHR031C	RRM3	mitochondrial genome maintenance*	0.432925	0.390565
YHR033W	YHR033W	biological_process	0.60064	0.72249
YHR035W	YHR035W	biological_process	0.323945	0.498735
YHR036W	BRL1	mRNA export from nucleus*	0.59907	0.57182
YHR037W	PUT2	glutamate biosynthetic process*	0.520355	0.294815
YHR039C-A	VMA10	vacuolar acidification*	0.497275	0.416735
YHR040W	BCD1	snoRNA metabolic process	0.581845	0.391565
YHR042W	NCP1	ergosterol biosynthetic process*	0.60215	0.314125
YHR043C	DOG2	response to stress*	0.53	0.39561
YHR044C	DOG1	glucose metabolic process	0.74142	0.43755
YHR045W	YHR045W	biological_process	0.39163	0.354065
YHR046C	INM1	inositol phosphate dephosphorylation	0.69791	0.56251
YHR048W	YHR048W	drug transport	0.66894	0.634445
YHR049W	FSH1	biological_process	0.96259	0.63078
YHR051W	COX6	mitochondrial electron transport, cytochrome c to oxygen	0.41557	0.338375
YHR052W	CIC1	ribosome biogenesis and assembly*	0.566305	0.645715
YHR055C	CUP1-2	response to copper ion	0.72143	0.82019
YHR056C	RSC30	RNA elongation from RNA polymerase II promoter*	0.574525	0.562355
YHR057C	CPR2	biological_process	0.649785	0.68514
YHR058C	MED6	transcription from RNA polymerase II promoter	0.45588	0.241635
YHR059W	FYV4	telomere maintenance	0.25686	0.37786
YHR060W	VMA22	protein complex assembly*	0.346625	0.58612
YHR061C	GIC1	establishment of cell polarity (sensu Fungi)*	0.308865	0.42622
YHR062C	RPP1	rRNA processing*	0.24406	0.243435
YHR063C	PAN5	pantothenate biosynthetic process	0.549685	0.43738
YHR065C	RRP3	ribosome biogenesis and assembly*	0.532855	0.40746
YHR067W	HTD2	fatty acid biosynthetic process	0.992135	0.8624
YHR068W	DYS1	hypusine biosynthetic process from peptidyl-lysine	0.838245	0.797225
YHR072W	ERG7	ergosterol biosynthetic process	0.60064	0.681265
YHR072W-A	NOP10	35S primary transcript processing*	0.20429	0.20721
YHR073W	OSH3	endocytosis*	0.66075	0.79138
YHR074W	QNS1	NAD biosynthetic process	0.64944	0.74847
YHR076W	PTC7	biological_process	0.19515	0.18967
YHR077C	NMD2	telomere maintenance*	0.15917	0.754245
YHR078W	YHR078W	biological_process	0.51839	0.53556
YHR079C-A	SAE3	meiotic recombination*	0.698315	0.17177
YHR081W	LRP1	telomere maintenance*	0.94767	0.89343
YHR082C	KSP1	protein amino acid phosphorylation	0.37472	0.38097
YHR083W	SAM35	protein import into mitochondrial outer membrane	0.67808	0.64607
YHR084W	STE12	pseudohyphal growth*	0.50877	0.56371
YHR086W	NAM8	nuclear mRNA splicing, via spliceosome*	0.950255	0.987345
YHR088W	RPF1	ribosome biogenesis and assembly*	0.569645	0.518175
YHR090C	YNG2	DNA repair*	0.818385	0.960605
YHR093W	#N/A	#N/A	0.47059	0.42722
YHR094C	HXT1	hexose transport	0.56179	0.66036
YHR095W	#N/A	#N/A	0.54601	0.614135
YHR098C	SFB3	ER to Golgi vesicle-mediated transport	0.46957	0.320105
YHR100C	YHR100C	biological_process	0.579935	0.53111
YHR103W	SBE22	cell wall organization and biogenesis	0.393505	0.637365
YHR104W	GRE3	response to stress*	0.989755	0.99053
YHR105W	YPT35	biological_process	0.92008	0.84755
YHR106W	TRR2	response to oxidative stress*	0.097955	0.46546
YHR108W	GGA2	Golgi to vacuole transport*	0.4671	0.543965
YHR109W	CTM1	protein modification process	0.673965	0.654695
YHR110W	ERP5	secretory pathway	0.411185	0.3125
YHR111W	UBA4	pseudohyphal growth*	0.694805	0.8105
YHR112C	YHR112C	sulfur metabolic process	0.714325	0.73862
YHR113W	YHR113W	proteolysis	0.4304	0.69914
YHR114W	BZZ1	endocytosis*	0.564605	0.65687
YHR115C	DMA1	mitotic spindle checkpoint*	0.511135	0.731365
YHR116W	COX23	aerobic respiration	0.43058	0.57747
YHR117W	TOM71	biological_process	0.926715	0.95445
YHR119W	SET1	telomere maintenance*	0.59812	0.46231
YHR120W	MSH1	DNA repair*	0.694805	0.60574
YHR121W	LSM12	RNA metabolic process	0.584175	0.280105
YHR122W	YHR122W	transcription	0.424505	0.65229
YHR123W	EPT1	phosphatidylethanolamine biosynthetic process	0.80721	0.58425
YHR125W	#N/A	#N/A	0.21348	0.285485
YHR126C	YHR126C	biological_process	0.540385	0.79695
YHR127W	YHR127W	biological_process	0.304935	0.340745
YHR128W	FUR1	pyrimidine salvage	0.861235	0.863065
YHR132C	ECM14	cell wall organization and biogenesis*	0.59071	0.61606
YHR133C	NSG1	sterol biosynthetic process	0.877095	0.89049
YHR134W	WSS1	response to DNA damage stimulus*	0.528305	0.57192
YHR135C	YCK1	protein amino acid phosphorylation*	0.46317	0.82844
YHR137W	ARO9	aromatic amino acid family metabolic process	0.77138	0.893905
YHR138C	YHR138C	vacuole fusion, non-autophagic	0.50901	0.530025
YHR139C	SPS100	telomere maintenance*	0.804565	0.700215
YHR139C-A	#N/A	#N/A	0.43488	0.51291
YHR140W	YHR140W	biological_process	0.45588	0.52799
YHR141C	RPL42B	translation	0.318005	0.522935
YHR142W	CHS7	ER to Golgi vesicle-mediated transport*	0.67129	0.459915
YHR143W	DSE2	cell wall organization and biogenesis*	0.44898	0.30631
YHR143W-A	RPC10	transcription from RNA polymerase II promoter*	0.419695	0.47079
YHR144C	DCD1	pyrimidine nucleotide metabolic process	0.31082	0.588395
YHR149C	SKG6	biological_process	0.25143	0.21384
YHR150W	PEX28	peroxisome organization and biogenesis	0.401805	0.3131
YHR151C	YHR151C	biological_process	0.40003	0.596645
YHR153C	SPO16	sporulation (sensu Fungi)	0.36808	0.53328
YHR156C	LIN1	biological_process	0.75876	0.73287
YHR158C	KEL1	cell morphogenesis*	0.666875	0.55693
YHR160C	PEX18	protein targeting to peroxisome	0.29995	0.219765
YHR162W	YHR162W	biological_process	0.160455	0.779275
YHR166C	CDC23	mitotic sister chromatid segregation*	0.410995	0.33001
YHR168W	MTG2	translation	0.61403	0.512615
YHR170W	NMD3	ribosome biogenesis and assembly*	0.33746	0.295765
YHR172W	SPC97	microtubule nucleation	0.55631	0.399015
YHR176W	FMO1	protein folding	0.34811	0.39457
YHR177W	YHR177W	biological_process	0.46617	0.47434
YHR179W	OYE2	biological_process	0.64102	0.60004
YHR180W	#N/A	#N/A	0.30851	0.46649
YHR181W	SVP26	ER to Golgi vesicle-mediated transport*	0.544935	0.08183
YHR183W	GND1	response to oxidative stress*	0.65668	0.69506
YHR184W	SSP1	spore wall assembly (sensu Fungi)*	0.353835	0.67664
YHR189W	PTH1	translation	0.98404	0.71636
YHR190W	ERG9	ergosterol biosynthetic process	0.541005	0.67243
YHR191C	CTF8	telomere maintenance*	0.597105	0.65995
YHR192W	YHR192W	biological_process	0.658975	0.68989
YHR195W	NVJ1	microautophagy	0.54198	0.577575
YHR196W	UTP9	ribosome biogenesis and assembly*	0.38272	0.42018
YHR200W	RPN10	ubiquitin-dependent protein catabolic process	0.56038	0.62945
YHR201C	PPX1	polyphosphate metabolic process	0.499265	0.62008
YHR203C	RPS4B	translation*	0.53351	0.77244
YHR205W	SCH9	protein amino acid phosphorylation*	0.409715	0.423435
YHR206W	SKN7	response to oxidative stress*	0.531765	0.352665
YHR207C	SET5	biological_process	0.96056	0.87576
YHR208W	BAT1	branched chain family amino acid biosynthetic process*	0.395315	0.41121
YHR209W	CRG1	biological_process	0.062315	0.657615
YHR210C	YHR210C	biological_process	0.361835	0.527055
YHR212W-A	YHR212W-A	biological_process	0.61069	0.481795
YHR213W	YHR213W	biological_process	0.552	0.705725
YHR214C-D	YHR214C-D	biological_process	0.46317	0.566995
YHR214W	YHR214W	biological_process	0.352605	0.2406
YHR214W-A	#N/A	#N/A	0.179405	0.33874
YHR215W	PHO12	biological_process	0.365205	0.29168
YHR217C	#N/A	#N/A	0.68429	0.492735
YHR218W	YHR218W	biological_process	0.16447	0.185755
YIL002C	INP51	cell wall organization and biogenesis*	0.49371	0.57054
YIL004C	BET1	ER to Golgi vesicle-mediated transport*	0.3286	0.670255
YIL005W	EPS1	protein retention in ER	0.37195	0.38312
YIL006W	YIA6	transport*	0.565915	0.626205
YIL007C	NAS2	ubiquitin-dependent protein catabolic process	0.229315	0.26983
YIL008W	URM1	response to drug*	0.368205	0.6644
YIL009C-A	EST3	telomere maintenance*	0.196165	0.487615
YIL009W	FAA3	lipid metabolic process*	0.386265	0.581725
YIL010W	DOT5	response to oxidative stress*	0.8634	0.81941
YIL011W	TIR3	biological_process	0.453965	0.286995
YIL012W	#N/A	#N/A	0.702895	0.320995
YIL014W	MNT3	protein amino acid O-linked glycosylation	0.43848	0.5082
YIL016W	SNL1	protein folding*	0.364205	0.56389
YIL017C	VID28	response to drug*	0.489285	0.47685
YIL018W	RPL2B	translation*	0.55748	0.57872
YIL019W	FAF1	ribosome biogenesis and assembly*	0.337515	0.559295
YIL020C	HIS6	histidine biosynthetic process	0.120885	0.478545
YIL021W	RPB3	transcription from RNA polymerase II promoter	0.62796	0.41605
YIL022W	TIM44	protein import into mitochondrial matrix	0.17876	0.45289
YIL024C	YIL024C	biological_process	0.295795	0.51782
YIL027C	KRE27	biological_process	0.443715	0.52811
YIL028W	#N/A	#N/A	0.49499	0.525995
YIL029C	YIL029C	response to drug	0.20436	0.56586
YIL032C	#N/A	#N/A	0.53559	0.49472
YIL033C	BCY1	negative regulation of Ras protein signal transduction	0.993215	0.95369
YIL034C	CAP2	filamentous growth*	0.694945	0.752815
YIL035C	CKA1	protein amino acid phosphorylation*	0.869805	0.85176
YIL036W	CST6	telomere maintenance*	0.4773	0.27247
YIL038C	NOT3	regulation of transcription from RNA polymerase II promoter*	0.45623	0.34782
YIL040W	APQ12	mRNA export from nucleus	0.155915	0.30229
YIL041W	GVP36	biological_process	0.498995	0.48005
YIL044C	AGE2	ER to Golgi vesicle-mediated transport*	0.49051	0.64761
YIL046W	MET30	protein ubiquitination*	0.505855	0.366825
YIL047C	SYG1	signal transduction	0.185555	0.283675
YIL049W	DFG10	pseudohyphal growth	0.685315	0.43891
YIL050W	PCL7	regulation of glycogen biosynthetic process*	0.223515	0.484225
YIL051C	MMF1	mitochondrial genome maintenance*	0.709305	0.72729
YIL052C	RPL34B	translation*	0.47059	0.596665
YIL054W	#N/A	#N/A	0.61452	0.503605
YIL055C	YIL055C	biological_process	0.989855	0.98548
YIL057C	YIL057C	biological_process	0.49564	0.786105
YIL058W	#N/A	#N/A	0.46476	0.487205
YIL062C	ARC15	mitochondrion inheritance*	0.34634	0.465565
YIL063C	YRB2	protein export from nucleus*	0.6677	0.76182
YIL065C	FIS1	response to drug*	0.296365	0.29385
YIL067C	YIL067C	biological_process	0.6633	0.371725
YIL068C	SEC6	cytokinesis*	0.16822	0.24085
YIL069C	RPS24B	translation	0.62215	0.75494
YIL070C	MAM33	response to drug*	0.67289	0.666475
YIL071C	PCI8	protein deneddylation	0.353235	0.5392
YIL072W	HOP1	synapsis*	0.596625	0.68887
YIL073C	SPO22	meiosis*	0.419825	0.341125
YIL074C	SER33	serine family amino acid biosynthetic process	0.657865	0.865485
YIL075C	RPN2	ubiquitin-dependent protein catabolic process	0.900545	0.84791
YIL076W	SEC28	ER to Golgi vesicle-mediated transport*	0.40234	0.622305
YIL077C	YIL077C	response to drug	0.640545	0.57883
YIL078W	THS1	translation	0.861455	0.841265
YIL082W-A	#N/A	#N/A	0.91554	0.77786
YIL083C	YIL083C	coenzyme A biosynthetic process	0.46549	0.43226
YIL084C	SDS3	histone deacetylation*	0.710595	0.25079
YIL087C	YIL087C	biological_process	0.508025	0.27582
YIL089W	YIL089W	biological_process	0.65169	0.620475
YIL090W	ICE2	endoplasmic reticulum organization and biogenesis	0.33239	0.292135
YIL091C	YIL091C	biological_process	0.987675	0.987015
YIL092W	YIL092W	biological_process	0.47667	0.398445
YIL096C	YIL096C	ribosome biogenesis and assembly	0.484205	0.503175
YIL102C	YIL102C	biological_process	0.20312	0.204085
YIL103W	DPH1	peptidyl-diphthamide biosynthetic process from peptidyl-histidine	0.5488	0.695505
YIL104C	SHQ1	snoRNA metabolic process	0.102335	0.129505
YIL106W	MOB1	protein amino acid phosphorylation*	0.245735	0.430635
YIL107C	PFK26	fructose 2,6-bisphosphate metabolic process*	0.92556	0.703365
YIL108W	YIL108W	biological_process	0.852145	0.991775
YIL109C	SEC24	ER to Golgi vesicle-mediated transport*	0.33286	0.611395
YIL110W	MNI1	response to drug	0.417895	0.31245
YIL111W	COX5B	mitochondrial electron transport, cytochrome c to oxygen	0.62272	0.47321
YIL112W	HOS4	histone deacetylation*	0.39641	0.341225
YIL113W	SDP1	MAPKKK cascade during cell wall biogenesis	0.55468	0.30419
YIL114C	POR2	ion transport	0.644055	0.49172
YIL116W	HIS5	histidine biosynthetic process	0.26088	0.197245
YIL118W	RHO3	actin filament organization*	0.32446	0.44184
YIL119C	RPI1	thiamin biosynthetic process*	0.416485	0.24471
YIL120W	QDR1	multidrug transport	0.2729	0.523115
YIL122W	POG1	G1/S-specific transcription in mitotic cell cycle*	0.31168	0.171595
YIL123W	SIM1	microtubule cytoskeleton organization and biogenesis	0.493845	0.30231
YIL124W	AYR1	phosphatidic acid biosynthetic process	0.82108	0.863085
YIL127C	YIL127C	ribosome biogenesis and assembly	0.59323	0.391245
YIL128W	MET18	telomere maintenance*	0.611355	0.63374
YIL131C	FKH1	pseudohyphal growth*	0.52165	0.391015
YIL134W	FLX1	FAD transport	0.46476	0.623625
YIL135C	VHS2	G1/S transition of mitotic cell cycle	0.7502	0.68514
YIL138C	TPM2	actin filament organization*	0.599515	0.34969
YIL139C	REV7	DNA repair*	0.3519	0.48283
YIL140W	AXL2	cellular bud site selection*	0.52632	0.422765
YIL141W	#N/A	#N/A	0.346375	0.29127
YIL142W	CCT2	protein folding*	0.687705	0.780705
YIL143C	SSL2	transcription from RNA polymerase II promoter*	0.4614	0.677845
YIL144W	TID3	chromosome segregation*	0.091725	0.20145
YIL146C	ECM37	cell wall organization and biogenesis	0.47225	0.5844
YIL148W	RPL40A	translation*	0.595075	0.518095
YIL151C	YIL151C	biological_process	0.507465	0.51793
YIL153W	RRD1	DNA repair*	0.41689	0.355675
YIL155C	GUT2	carbohydrate metabolic process*	0.41374	0.40896
YIL156W	UBP7	protein deubiquitination	0.79227	0.59589
YIL157C	COA1	biological_process	0.4184	0.10436
YIL158W	YIL158W	biological_process	0.25666	0.29353
YIL160C	POT1	fatty acid beta-oxidation	0.99851	0.99176
YIL161W	YIL161W	biological_process	0.40124	0.37073
YIL163C	#N/A	#N/A	0.47446	0.59007
YIL164C	NIT1	biological_process	0.194815	0.23111
YIL165C	YIL165C	biological_process	0.64556	0.58331
YIL166C	YIL166C	transport	0.72047	0.37883
YIL167W	SDL1	response to toxin*	0.40676	0.268435
YIL171W	YIL171W	biological_process*	0.687145	0.292095
YIL176C	PAU14	biological_process	0.41557	0.428375
YIR001C	SGN1	mRNA metabolic process	0.97315	0.77759
YIR003W	YIR003W	biological_process	0.88459	0.890865
YIR004W	DJP1	protein import into peroxisome matrix	0.326565	0.236015
YIR007W	YIR007W	biological_process	0.372645	0.36727
YIR008C	PRI1	DNA replication*	0.6803	0.451245
YIR011C	STS1	ubiquitin-dependent protein catabolic process*	0.36645	0.247435
YIR012W	SQT1	ribosome biogenesis and assembly*	0.664925	0.487055
YIR013C	GAT4	transcription	0.49629	0.254595
YIR016W	YIR016W	biological_process	0.474435	0.52013
YIR017C	MET28	response to drug*	0.098025	0.300625
YIR020C	#N/A	#N/A	0.359295	0.30184
YIR021W	MRS1	Group I intron splicing	0.314285	0.201085
YIR023W	DAL81	regulation of transcription from RNA polymerase II promoter*	0.74988	0.375805
YIR024C	YIR024C	biological_process	0.489285	0.35667
YIR026C	YVH1	ribosome biogenesis and assembly*	0.39233	0.229935
YIR027C	DAL1	allantoin catabolic process	0.57825	0.676035
YIR028W	DAL4	allantoin transport	0.25973	0.23493
YIR029W	DAL2	allantoin catabolic process	0.531705	0.447175
YIR030C	DCG1	nitrogen compound metabolic process	0.55468	0.62892
YIR031C	DAL7	allantoin catabolic process	0.405965	0.40581
YIR032C	DAL3	allantoin catabolic process	0.13637	0.21315
YIR036C	IRC24	biological_process	0.37305	0.382005
YIR037W	HYR1	response to oxidative stress	0.523685	0.51146
YIR038C	GTT1	glutathione metabolic process	0.59807	0.78201
YIR039C	YPS6	biological_process	0.5623	0.18589
YIR040C	#N/A	#N/A	0.27132	0.533365
YIR042C	YIR042C	biological_process	0.591045	0.448125
YIR044C	YIR044C	biological_process	0.49274	0.545575
YJL001W	PRE3	sporulation (sensu Fungi)*	0.4614	0.42551
YJL002C	OST1	protein amino acid N-linked glycosylation*	0.522505	0.62466
YJL004C	SYS1	Golgi to endosome transport*	0.31442	0.638535
YJL007C	#N/A	#N/A	0.42748	0.492075
YJL008C	CCT8	protein folding*	0.159155	0.23235
YJL009W	#N/A	#N/A	0.43211	0.6085
YJL011C	RPC17	transcription initiation from RNA polymerase III promoter	0.19511	0.49559
YJL012C	VTC4	vacuole fusion, non-autophagic	0.295295	0.475105
YJL017W	#N/A	#N/A	0.272405	0.375495
YJL019W	MPS3	mitotic sister chromatid cohesion*	0.39138	0.23449
YJL020C	BBC1	actin cytoskeleton organization and biogenesis	0.388545	0.44572
YJL022W	#N/A	#N/A	0.37642	0.306795
YJL023C	PET130	biological_process	0.271695	0.295005
YJL026W	RNR2	DNA replication	0.584515	0.51006
YJL027C	YJL027C	biological_process	0.571415	0.71291
YJL028W	YJL028W	biological_process	0.161365	0.44025
YJL029C	VPS53	Golgi to vacuole transport*	0.78676	0.515295
YJL030W	MAD2	mitotic spindle checkpoint*	0.53514	0.60417
YJL031C	BET4	protein amino acid geranylgeranylation	0.632535	0.49448
YJL032W	#N/A	#N/A	0.22703	0.557745
YJL036W	SNX4	protein targeting to vacuole	0.243775	0.26562
YJL037W	IRC18	biological_process	0.246495	0.501185
YJL038C	YJL038C	biological_process	0.3519	0.569325
YJL043W	YJL043W	biological_process	0.301765	0.42677
YJL044C	GYP6	intracellular protein transport	0.12508	0.364285
YJL045W	YJL045W	cellular respiration	0.23758	0.27448
YJL046W	YJL046W	biological_process	0.19543	0.314455
YJL047C	RTT101	ubiquitin-dependent protein catabolic process*	0.83008	0.791225
YJL049W	YJL049W	biological_process	0.484145	0.382515
YJL051W	IRC8	biological_process	0.61335	0.30866
YJL053W	PEP8	protein retention in Golgi*	0.608925	0.46266
YJL055W	YJL055W	biological_process	0.36665	0.61121
YJL056C	ZAP1	regulation of transcription from RNA polymerase II promoter*	0.47653	0.67361
YJL058C	BIT61	regulation of cell growth*	0.258325	0.42079
YJL060W	BNA3	NAD biosynthetic process	0.583025	0.60661
YJL063C	MRPL8	translation*	0.47819	0.51726
YJL064W	#N/A	#N/A	0.489565	0.67395
YJL065C	DLS1	chromatin silencing at telomere	0.45469	0.517825
YJL066C	MPM1	biological_process	0.5813	0.413825
YJL067W	#N/A	#N/A	0.200775	0.366075
YJL068C	YJL068C	formaldehyde catabolic process	0.493065	0.45858
YJL069C	UTP18	ribosome biogenesis and assembly*	0.6132	0.41602
YJL070C	YJL070C	biological_process	0.21485	0.22545
YJL071W	ARG2	telomere maintenance*	0.39803	0.66336
YJL072C	PSF2	DNA-dependent DNA replication	0.4411	0.448515
YJL075C	#N/A	#N/A	0.36861	0.57577
YJL076W	NET1	regulation of exit from mitosis*	0.29586	0.389995
YJL077C	ICS3	biological_process	0.164875	0.215215
YJL080C	SCP160	response to drug*	0.99838	0.9992
YJL084C	ALY2	biological_process	0.48075	0.58198
YJL085W	EXO70	cytokinesis*	0.476735	0.45428
YJL086C	#N/A	#N/A	0.419695	0.36027
YJL089W	SIP4	regulation of transcription from RNA polymerase II promoter*	0.43016	0.657615
YJL096W	MRPL49	translation	0.643045	0.43031
YJL097W	PHS1	secretory pathway	0.79202	0.797265
YJL098W	SAP185	G1/S transition of mitotic cell cycle	0.37499	0.37421
YJL099W	CHS6	Golgi to plasma membrane transport*	0.32701	0.520115
YJL100W	LSB6	actin filament organization*	0.233375	0.37464
YJL101C	GSH1	response to drug*	0.31242	0.348235
YJL103C	GSM1	oxidative phosphorylation	0.537435	0.41505
YJL104W	PAM16	protein import into mitochondrial matrix	0.45138	0.52721
YJL105W	SET4	biological_process	0.21364	0.06582
YJL106W	IME2	protein amino acid phosphorylation*	0.360365	0.41592
YJL107C	YJL107C	biological_process	0.42511	0.77786
YJL108C	PRM10	conjugation with cellular fusion*	0.661475	0.56659
YJL110C	GZF3	negative regulation of transcription from RNA polymerase II promoter*	0.99515	0.996345
YJL111W	CCT7	protein folding*	0.38709	0.492075
YJL112W	MDV1	mitochondrial genome maintenance*	0.837185	0.19331
YJL113W	#N/A	#N/A	0.411185	0.35392
YJL114W	#N/A	#N/A	0.547045	0.455585
YJL115W	ASF1	chromatin silencing at telomere*	0.65466	0.17665
YJL116C	NCA3	mitochondrion organization and biogenesis	0.574425	0.34254
YJL117W	PHO86	protein folding*	0.72539	0.4942
YJL119C	#N/A	#N/A	0.689245	0.659315
YJL121C	RPE1	pentose-phosphate shunt	0.636115	0.440565
YJL122W	ALB1	ribosome biogenesis and assembly*	0.32227	0.24658
YJL123C	YJL123C	biological_process	0.269805	0.50497
YJL124C	LSM1	mRNA catabolic process*	0.550155	0.342705
YJL126W	NIT2	biological_process	0.237	0.41304
YJL127C	SPT10	DNA repair*	0.408115	0.29891
YJL128C	PBS2	protein amino acid phosphorylation*	0.353295	0.551055
YJL131C	YJL131C	biological_process	0.29586	0.384705
YJL132W	YJL132W	biological_process	0.09662	0.11189
YJL133W	MRS3	mitochondrial transport*	0.319695	0.61686
YJL135W	#N/A	#N/A	0.25069	0.40783
YJL136C	RPS21B	translation	0.64102	0.75845
YJL137C	GLG2	glycogen biosynthetic process	0.44673	0.514305
YJL138C	TIF2	translational initiation*	0.231185	0.295425
YJL139C	YUR1	protein amino acid N-linked glycosylation*	0.336195	0.524935
YJL141C	YAK1	protein amino acid phosphorylation	0.397805	0.423
YJL142C	#N/A	#N/A	0.401805	0.42823
YJL143W	TIM17	protein import into mitochondrial matrix	0.605795	0.53207
YJL145W	SFH5	phospholipid transport	0.35621	0.475745
YJL146W	IDS2	meiosis	0.61015	0.562355
YJL147C	YJL147C	biological_process	0.135165	0.41286
YJL148W	RPA34	ribosome biogenesis and assembly*	0.679185	0.69829
YJL149W	YJL149W	biological_process	0.355265	0.371645
YJL151C	SNA3	biological_process	0.31097	0.36616
YJL152W	#N/A	#N/A	0.28845	0.366735
YJL153C	INO1	inositol metabolic process	0.414625	0.377955
YJL154C	VPS35	protein retention in Golgi*	0.52732	0.258765
YJL156C	SSY5	protein processing*	0.305775	0.27326
YJL157C	FAR1	pheromone-dependent signal transduction during conjugation with cellular fusion*	0.12868	0.148715
YJL158C	CIS3	cell wall organization and biogenesis	0.41515	0.28447
YJL159W	HSP150	cell wall organization and biogenesis	0.33408	0.44899
YJL160C	YJL160C	biological_process	0.55092	0.4026
YJL161W	FMP33	biological_process	0.283205	0.23886
YJL162C	JJJ2	biological_process	0.19587	0.28392
YJL164C	TPK1	protein amino acid phosphorylation*	0.346375	0.582565
YJL166W	QCR8	aerobic respiration*	0.662945	0.3657
YJL167W	ERG20	ergosterol biosynthetic process*	0.568215	0.73163
YJL169W	#N/A	#N/A	0.661845	0.13709
YJL170C	ASG7	conjugation with cellular fusion	0.340545	0.30068
YJL173C	RFA3	nucleotide-excision repair*	0.551035	0.69461
YJL175W	#N/A	#N/A	0.425505	0.2823
YJL176C	SWI3	chromatin remodeling	0.20889	0.2693
YJL177W	RPL17B	translation	0.33408	0.22265
YJL178C	ATG27	autophagy*	0.477605	0.72222
YJL179W	PFD1	telomere maintenance*	0.479165	0.670405
YJL180C	ATP12	F-type ATPase complex assembly	0.47059	0.27948
YJL181W	YJL181W	biological_process	0.42065	0.33678
YJL182C	#N/A	#N/A	0.55261	0.3695
YJL183W	MNN11	protein amino acid glycosylation	0.59685	0.629485
YJL184W	GON7	telomere maintenance*	0.581025	0.57191
YJL185C	YJL185C	biological_process	0.52063	0.63058
YJL188C	#N/A	#N/A	0.43105	0.35775
YJL189W	RPL39	translation	0.40835	0.326195
YJL190C	RPS22A	translation*	0.59807	0.36893
YJL191W	RPS14B	translation*	0.69631	0.626205
YJL192C	SOP4	ER to Golgi vesicle-mediated transport	0.44618	0.4515
YJL193W	YJL193W	biological_process	0.652675	0.53456
YJL194W	CDC6	pre-replicative complex formation	0.30065	0.50132
YJL195C	#N/A	#N/A	0.400795	0.53354
YJL196C	ELO1	fatty acid elongation, unsaturated fatty acid	0.81145	0.63833
YJL198W	PHO90	phosphate transport	0.67474	0.26486
YJL199C	#N/A	#N/A	0.399485	0.291155
YJL200C	ACO2	biological_process	0.612005	0.67525
YJL201W	ECM25	response to drug*	0.85042	0.433695
YJL202C	#N/A	#N/A	0.37973	0.226775
YJL203W	PRP21	nuclear mRNA splicing, via spliceosome	0.30842	0.384275
YJL204C	RCY1	endocytosis	0.118905	0.12862
YJL205C-A	#N/A	#N/A	0.51057	0.562305
YJL208C	NUC1	ribosome biogenesis and assembly*	0.315315	0.156295
YJL210W	PEX2	peroxisome organization and biogenesis	0.637055	0.36893
YJL211C	#N/A	#N/A	0.605795	0.37428
YJL213W	YJL213W	biological_process	0.681185	0.40528
YJL215C	#N/A	#N/A	0.195735	0.14707
YJL216C	YJL216C	biological_process	0.35311	0.521775
YJL217W	YJL217W	biological_process	0.434985	0.32238
YJL218W	YJL218W	biological_process	0.99764	0.99123
YJL220W	#N/A	#N/A	0.580645	0.380085
YJR005W	APL1	vesicle-mediated transport	0.47854	0.804835
YJR006W	HYS2	nucleotide-excision repair*	0.76177	0.85185
YJR008W	YJR008W	biological_process	0.585735	0.61144
YJR009C	TDH2	glycolysis*	0.592075	0.45204
YJR010C-A	SPC1	protein targeting to ER*	0.36938	0.64921
YJR010W	MET3	methionine metabolic process*	0.61545	0.786725
YJR013W	GPI14	GPI anchor biosynthetic process*	0.937185	0.918835
YJR014W	TMA22	biological_process	0.50732	0.531535
YJR017C	ESS1	negative regulation of transcription from RNA polymerase II promoter*	0.569485	0.39741
YJR018W	#N/A	#N/A	0.18935	0.390575
YJR019C	TES1	fatty acid oxidation	0.998155	0.99444
YJR020W	#N/A	#N/A	0.15912	0.430205
YJR022W	LSM8	nuclear mRNA splicing, via spliceosome	0.621775	0.483065
YJR023C	#N/A	#N/A	0.44544	0.372855
YJR024C	YJR024C	biological_process	0.519015	0.20088
YJR025C	BNA1	NAD biosynthetic process	0.76617	0.777265
YJR032W	CPR7	response to stress	0.6009	0.67755
YJR034W	PET191	cytochrome c oxidase complex assembly	0.571625	0.617775
YJR035W	RAD26	nucleotide-excision repair*	0.27346	0.306385
YJR036C	HUL4	protein monoubiquitination*	0.445615	0.10141
[truncated: 2,090 more rows]

## Sheet: mRNA binders
			173	mRNA	total RNA
Name	Gene	Process	Count	Median PR F635	Median PR F532
YBL030C	PET9	aerobic respiration*	1	0.958765	0.69451
YBL032W	HEK2	telomere maintenance via telomerase*	1	0.995775	0.999365
YBL064C	PRX1	response to oxidative stress*	1	0.967855	0.95978
YBR021W	FUR4	uracil transport	1	0.93515	0.62892
YBR035C	PDX3	telomere maintenance*	1	0.95641	0.84395
YBR118W	TEF2	translational elongation*	1	0.977145	0.948455
YBR121C	GRS1	transcription termination*	1	0.904705	0.898175
YBR222C	PCS60	biological_process	1	0.99902	0.99318
YBR293W	VBA2	basic amino acid transport	1	0.93331	0.84645
YCR016W	YCR016W	ribosome biogenesis and assembly	1	0.90517	0.907165
YCR028C-A	RIM1	mitochondrial genome maintenance	1	0.9931	0.99988
YCR072C	RSA4	ribosome biogenesis and assembly*	1	0.994825	0.997185
YDL031W	DBP10	ribosome biogenesis and assembly*	1	0.98854	0.965005
YDL051W	LHP1	tRNA processing	1	0.947985	0.9775
YDL078C	MDH3	fatty acid beta-oxidation*	1	0.998515	0.995355
YDL124W	YDL124W	metabolic process	1	0.994465	0.992405
YDL130W	RPP1B	translational elongation*	1	0.90614	0.96746
YDL220C	CDC13	telomere maintenance*	1	0.962285	0.996045
YDR051C	YDR051C	biological_process	1	0.99743	0.93323
YDR120C	TRM1	ribosome biogenesis and assembly*	1	0.920205	0.93553
YDR153C	ENT5	Golgi to endosome transport*	1	0.9013	0.93814
YDR411C	DFM1	unfolded protein response*	1	0.98626	0.64058
YDR432W	NPL3	pseudohyphal growth*	1	0.994765	0.994355
YDR439W	LRS4	chromatin silencing at rDNA*	1	0.92696	0.759455
YDR538W	PAD1	aromatic compound catabolic process	1	0.98791	0.910745
YER087W	YER087W	biological_process	1	0.93372	0.71058
YER101C	AST2	biological_process	1	0.98091	0.945605
YER125W	RSP5	endocytosis*	1	0.97034	0.97524
YER156C	YER156C	biological_process	1	0.91668	0.887295
YER163C	YER163C	biological_process	1	0.95286	0.919345
YFL001W	DEG1	RNA processing	1	0.922025	0.937635
YFR010W	UBP6	protein deubiquitination	1	0.982045	0.957725
YGL021W	ALK1	protein amino acid phosphorylation*	1	0.94533	0.584715
YGL055W	OLE1	mitochondrion inheritance*	1	0.94021	0.868985
YGL080W	FMP37	biological_process	1	0.95361	0.68479
YGL104C	VPS73	protein targeting to vacuole	1	0.96964	0.48215
YGL122C	NAB2	mRNA polyadenylation*	1	0.95481	0.81558
YGL184C	STR3	methionine biosynthetic process	1	0.999535	0.951365
YGR024C	THG1	tRNA modification	1	0.92239	0.937925
YGR157W	CHO2	telomere maintenance*	1	0.95257	0.558875
YGR187C	HGH1	ribosome biogenesis and assembly	1	0.955655	0.6325
YGR196C	FYV8	biological_process	1	0.975095	0.64226
YGR264C	MES1	methionyl-tRNA aminoacylation	1	0.98254	0.832795
YHR049W	FSH1	biological_process	1	0.96259	0.63078
YHR067W	HTD2	fatty acid biosynthetic process	1	0.992135	0.8624
YHR081W	LRP1	telomere maintenance*	1	0.94767	0.89343
YHR086W	NAM8	nuclear mRNA splicing, via spliceosome*	1	0.950255	0.987345
YHR104W	GRE3	response to stress*	1	0.989755	0.99053
YHR105W	YPT35	biological_process	1	0.92008	0.84755
YHR117W	TOM71	biological_process	1	0.926715	0.95445
YHR189W	PTH1	translation	1	0.98404	0.71636
YHR207C	SET5	biological_process	1	0.96056	0.87576
YIL033C	BCY1	negative regulation of Ras protein signal transduction	1	0.993215	0.95369
YIL055C	YIL055C	biological_process	1	0.989855	0.98548
YIL075C	RPN2	ubiquitin-dependent protein catabolic process	1	0.900545	0.84791
YIL082W-A	#N/A	#N/A	1	0.91554	0.77786
YIL091C	YIL091C	biological_process	1	0.987675	0.987015
YIL107C	PFK26	fructose 2,6-bisphosphate metabolic process*	1	0.92556	0.703365
YIL160C	POT1	fatty acid beta-oxidation	1	0.99851	0.99176
YIR001C	SGN1	mRNA metabolic process	1	0.97315	0.77759
YJL080C	SCP160	response to drug*	1	0.99838	0.9992
YJL110C	GZF3	negative regulation of transcription from RNA polymerase II promoter*	1	0.99515	0.996345
YJL218W	YJL218W	biological_process	1	0.99764	0.99123
YJR013W	GPI14	GPI anchor biosynthetic process*	1	0.937185	0.918835
YJR019C	TES1	fatty acid oxidation	1	0.998155	0.99444
YJR051W	OSM1	metabolic process	1	0.98961	0.851955
YJR063W	RPA12	ribosome biogenesis and assembly*	1	0.955355	0.626405
YJR077C	MIR1	phosphate transport	1	0.965005	0.76011
YJR085C	YJR085C	biological_process	1	0.95527	0.82061
YJR110W	YMR1	vesicle-mediated transport*	1	0.99267	0.85764
YJR111C	YJR111C	biological_process	1	0.96542	0.89279
YJR144W	MGM101	DNA repair*	1	0.93981	0.78618
YKL027W	YKL027W	biological_process	1	0.96649	0.723835
YKL067W	YNK1	DNA metabolic process*	1	0.98776	0.904035
YKL079W	SMY1	exocytosis	1	0.91706	0.93218
YKL085W	MDH1	tricarboxylic acid cycle*	1	0.996485	0.83432
YKL091C	YKL091C	biological_process	1	0.98071	0.93532
YKL130C	SHE2	intracellular mRNA localization*	1	0.98706	0.985765
YKL132C	RMA1	biological_process	1	0.96385	0.991355
YKL150W	MCR1	response to oxidative stress*	1	0.94423	0.999595
YKR009C	FOX2	fatty acid beta-oxidation	1	0.99965	0.998625
YKR049C	FMP46	biological_process	1	0.97473	0.89556
YKR080W	MTD1	one-carbon compound metabolic process*	1	0.939415	0.68881
YKR084C	HBS1	translation	1	0.97778	0.93828
YLL039C	UBI4	sporulation (sensu Fungi)*	1	0.91068	0.75151
YLR003C	YLR003C	ribosome biogenesis and assembly*	1	0.912965	0.967315
YLR017W	MEU1	glutamate biosynthetic process*	1	0.980545	0.968595
YLR022C	SDO1	35S primary transcript processing*	1	0.926085	0.90607
YLR050C	YLR050C	biological_process	1	0.968995	0.91262
YLR132C	YLR132C	nuclear mRNA splicing, via spliceosome*	1	0.900585	0.816215
YLR150W	STM1	telomere maintenance*	1	0.9552	0.98799
YLR211C	YLR211C	biological_process	1	0.93104	0.60118
YLR225C	YLR225C	biological_process	1	0.91391	0.836165
YLR244C	MAP1	proteolysis	1	0.99341	0.993315
YLR257W	YLR257W	biological_process	1	0.92002	0.97323
YLR274W	CDC46	DNA replication initiation*	1	0.908605	0.79166
YLR326W	YLR326W	biological_process	1	0.920965	0.8007
YLR392C	YLR392C	biological_process	1	0.924035	0.71769
YLR426W	YLR426W	response to drug	1	0.97126	0.83462
YLR452C	SST2	signal transduction*	1	0.96588	0.74424
YML042W	CAT2	carnitine metabolic process	1	0.94309	0.78387
YML045W-A	#N/A	#N/A	1	0.975095	0.80664
YML048W	GSF2	protein folding*	1	0.96884	0.71747
YML080W	DUS1	tRNA modification	1	0.99122	0.96279
YMR004W	MVP1	protein targeting to vacuole	1	0.908135	0.58043
YMR039C	SUB1	positive regulation of transcription from RNA polymerase II promoter*	1	0.978565	0.99668
YMR090W	YMR090W	biological_process	1	0.997985	0.830745
YMR114C	YMR114C	biological_process	1	0.907425	0.882625
YMR120C	ADE17	'de novo' IMP biosynthetic process*	1	0.99632	0.97022
YMR123W	PKR1	protein complex assembly	1	0.949165	0.939245
YMR205C	PFK2	glycolysis	1	0.95113	0.88663
YMR229C	RRP5	ribosome biogenesis and assembly*	1	0.99122	0.997715
YMR268C	PRP24	spliceosome assembly*	1	0.991575	0.964145
YMR290C	HAS1	ribosome biogenesis and assembly*	1	0.98358	0.9357
YNL007C	SIS1	protein folding*	1	0.97971	0.95748
YNL009W	IDP3	fatty acid beta-oxidation*	1	0.97045	0.75293
YNL048W	ALG11	protein amino acid glycosylation*	1	0.967765	0.79553
YNL136W	EAF7	DNA repair*	1	0.910555	0.93173
YNL168C	FMP41	biological_process	1	0.992195	0.990195
YNL175C	NOP13	ribosome biogenesis and assembly	1	0.936555	0.762875
YNL200C	YNL200C	biological_process	1	0.96041	0.76086
YNL202W	SPS19	sporulation (sensu Fungi)*	1	0.998215	0.791435
YNL219C	ALG9	protein amino acid glycosylation*	1	0.985065	0.87407
YNL225C	CNM67	microtubule nucleation*	1	0.95122	0.881995
YNL229C	URE2	telomere maintenance*	1	0.95401	0.530025
YNL239W	LAP3	homocysteine catabolic process*	1	0.961575	0.96907
YNL255C	GIS2	intracellular signaling cascade	1	0.97871	0.95559
YNL263C	YIF1	ER to Golgi vesicle-mediated transport	1	0.96437	0.562355
YNL280C	ERG24	ergosterol biosynthetic process	1	0.984305	0.88518
YNL284C-A	#N/A	#N/A	1	0.928135	0.954335
YNL292W	PUS4	tRNA modification	1	0.93589	0.967305
YNR015W	SMM1	tRNA modification*	1	0.970935	0.711585
YNR019W	ARE2	sterol metabolic process	1	0.94044	0.91747
YNR056C	BIO5	biotin biosynthetic process*	1	0.92568	0.69315
YOL021C	DIS3	35S primary transcript processing*	1	0.98294	0.96008
YOL042W	NGL1	biological_process	1	0.9798	0.571485
YOL065C	INP54	exocytosis*	1	0.984665	0.616155
YOL066C	RIB2	riboflavin biosynthetic process*	1	0.928935	0.991485
YOL070C	NBA1	biological_process	1	0.95731	0.79021
YOL103W-A	#N/A	#N/A	1	0.986545	0.91342
YOL123W	HRP1	mRNA cleavage*	1	0.993325	0.990475
YOR002W	ALG6	aerobic respiration*	1	0.98047	0.66494
YOR027W	STI1	protein folding	1	0.995895	0.95543
YOR059C	YOR059C	biological_process	1	0.91398	0.87365
YOR084W	YOR084W	peroxisome organization and biogenesis	1	0.977255	0.739845
YOR118W	YOR118W	biological_process	1	0.989055	0.719065
YOR120W	GCY1	response to salt stress*	1	0.9942	0.99381
YOR141C	ARP8	chromatin remodeling*	1	0.94792	0.97884
YOR195W	SLK19	meiosis*	1	0.954065	0.971435
YOR204W	DED1	translational initiation*	1	0.915215	0.5117
YOR216C	RUD3	ER to Golgi vesicle-mediated transport	1	0.933725	0.98084
YOR236W	DFR1	folic acid and derivative metabolic process	1	0.994275	0.805355
YOR251C	YOR251C	biological_process	1	0.93019	0.941865
YOR269W	PAC1	nuclear migration, microtubule-mediated	1	0.92253	0.47079
YOR271C	FSF1	biological_process	1	0.92565	0.83095
YOR286W	FMP31	biological_process	1	0.928835	0.68547
YOR386W	PHR1	photoreactive repair	1	0.996035	0.99789
YOR391C	HSP33	biological_process	1	0.96154	0.719965
YPL050C	MNN9	protein amino acid N-linked glycosylation*	1	0.98969	0.671595
YPL054W	LEE1	biological_process	1	0.98307	0.63498
YPL123C	RNY1	cell morphogenesis	1	0.98911	0.992385
YPL132W	COX11	aerobic respiration*	1	0.90984	0.92854
YPL133C	RDS2	response to xenobiotic stimulus	1	0.9509	0.97213
YPR002W	PDH1	propionate metabolic process	1	0.97462	0.80532
YPR113W	PIS1	cell cycle*	1	0.91005	0.71475
YPR152C	URN1	biological_process	1	0.93837	0.969645
YPR183W	DPM1	protein amino acid N-linked glycosylation*	1	0.940325	0.874685
YAR007C	RFA1	nucleotide-excision repair*	1	0.978675	0.996385
YBR300C	#N/A	#N/A	1	0.90534	0.70395
YHR214C-C	#N/A	#N/A	1	0.98237	0.96967
YOR362C	PRE10	ubiquitin-dependent protein catabolic process	1	0.98679	0.85857
YPR158C-C	#N/A	#N/A	1	0.91797	0.83459
YOR239W	ABP140	actin cytoskeleton organization and biogenesis	1	0.925335	0.736335

## Sheet: total RNA binders
			67	mRNA	total RNA
Name	Gene	Process	Count	Median PR F635 per unique protein	Median PR F532 per unique protein
YBL032W	HEK2	telomere maintenance via telomerase*	1	0.995775	0.999365
YBL064C	PRX1	response to oxidative stress*	1	0.967855	0.95978
YBR222C	PCS60	biological_process	1	0.99902	0.99318
YCR028C-A	RIM1	mitochondrial genome maintenance	1	0.9931	0.99988
YCR072C	RSA4	ribosome biogenesis and assembly*	1	0.994825	0.997185
YDL031W	DBP10	ribosome biogenesis and assembly*	1	0.98854	0.965005
YDL051W	LHP1	tRNA processing	1	0.947985	0.9775
YDL078C	MDH3	fatty acid beta-oxidation*	1	0.998515	0.995355
YDL124W	YDL124W	metabolic process	1	0.994465	0.992405
YDL130W	RPP1B	translational elongation*	1	0.90614	0.96746
YDL220C	CDC13	telomere maintenance*	1	0.962285	0.996045
YDR432W	NPL3	pseudohyphal growth*	1	0.994765	0.994355
YER125W	RSP5	endocytosis*	1	0.97034	0.97524
YER148W	SPT15	transcription from RNA polymerase II promoter*	1	0.873605	0.987045
YFR010W	UBP6	protein deubiquitination	1	0.982045	0.957725
YFR034C	PHO4	phosphate metabolic process*	1	0.74364	0.95594
YGL184C	STR3	methionine biosynthetic process	1	0.999535	0.951365
YHR086W	NAM8	nuclear mRNA splicing, via spliceosome*	1	0.950255	0.987345
YHR090C	YNG2	DNA repair*	1	0.818385	0.960605
YHR104W	GRE3	response to stress*	1	0.989755	0.99053
YHR117W	TOM71	biological_process	1	0.926715	0.95445
YIL033C	BCY1	negative regulation of Ras protein signal transduction	1	0.993215	0.95369
YIL055C	YIL055C	biological_process	1	0.989855	0.98548
YIL091C	YIL091C	biological_process	1	0.987675	0.987015
YIL108W	YIL108W	biological_process	1	0.852145	0.991775
YIL160C	POT1	fatty acid beta-oxidation	1	0.99851	0.99176
YJL080C	SCP160	response to drug*	1	0.99838	0.9992
YJL110C	GZF3	negative regulation of transcription from RNA polymerase II promoter*	1	0.99515	0.996345
YJL218W	YJL218W	biological_process	1	0.99764	0.99123
YJR019C	TES1	fatty acid oxidation	1	0.998155	0.99444
YKL130C	SHE2	intracellular mRNA localization*	1	0.98706	0.985765
YKL132C	RMA1	biological_process	1	0.96385	0.991355
YKL150W	MCR1	response to oxidative stress*	1	0.94423	0.999595
YKR009C	FOX2	fatty acid beta-oxidation	1	0.99965	0.998625
YLR003C	YLR003C	ribosome biogenesis and assembly*	1	0.912965	0.967315
YLR017W	MEU1	glutamate biosynthetic process*	1	0.980545	0.968595
YLR150W	STM1	telomere maintenance*	1	0.9552	0.98799
YLR244C	MAP1	proteolysis	1	0.99341	0.993315
YLR257W	YLR257W	biological_process	1	0.92002	0.97323
YLR309C	IMH1	vesicle-mediated transport*	1	0.606835	0.97741
YML080W	DUS1	tRNA modification	1	0.99122	0.96279
YMR039C	SUB1	positive regulation of transcription from RNA polymerase II promoter*	1	0.978565	0.99668
YMR120C	ADE17	'de novo' IMP biosynthetic process*	1	0.99632	0.97022
YMR229C	RRP5	ribosome biogenesis and assembly*	1	0.99122	0.997715
YMR268C	PRP24	spliceosome assembly*	1	0.991575	0.964145
YMR296C	LCB1	sphingolipid biosynthetic process	1	0.48068	0.98441
YNL007C	SIS1	protein folding*	1	0.97971	0.95748
YNL168C	FMP41	biological_process	1	0.992195	0.990195
YNL239W	LAP3	homocysteine catabolic process*	1	0.961575	0.96907
YNL255C	GIS2	intracellular signaling cascade	1	0.97871	0.95559
YNL284C-A	#N/A	#N/A	1	0.928135	0.954335
YNL292W	PUS4	tRNA modification	1	0.93589	0.967305
YOL021C	DIS3	35S primary transcript processing*	1	0.98294	0.96008
YOL066C	RIB2	riboflavin biosynthetic process*	1	0.928935	0.991485
YOL123W	HRP1	mRNA cleavage*	1	0.993325	0.990475
YOR027W	STI1	protein folding	1	0.995895	0.95543
YOR120W	GCY1	response to salt stress*	1	0.9942	0.99381
YOR141C	ARP8	chromatin remodeling*	1	0.94792	0.97884
YOR195W	SLK19	meiosis*	1	0.954065	0.971435
YOR216C	RUD3	ER to Golgi vesicle-mediated transport	1	0.933725	0.98084
YOR386W	PHR1	photoreactive repair	1	0.996035	0.99789
YPL123C	RNY1	cell morphogenesis	1	0.98911	0.992385
YPL133C	RDS2	response to xenobiotic stimulus	1	0.9509	0.97213
YPR052C	NHP6A	positive regulation of transcription from RNA polymerase II promoter*	1	0.849795	0.98818
YPR152C	URN1	biological_process	1	0.93837	0.969645
YAR007C	RFA1	nucleotide-excision repair*	1	0.978675	0.996385
YHR214C-C	#N/A	#N/A	1	0.98237	0.96967
