# Supplementary material for: A Screen for RNA-Binding Proteins in Yeast Indicates Dual Functions for Many Enzymes
Source: PLoS One. 2010 Nov 11;5(11):e15499. doi: 10.1371/journal.pone.0015499 (PMC2988813; doi:10.1371/journal.pone.0015499)
Supplement: Dataset S3 — RIP-Chip data for 13 potential RBPs. Features/ORFs that were at least 3-fold enriched compared to mock isolates with p<0.01 are indicated in a separate worksheets. Therein, fold changes (log2 ratios) are in black, p-values are shown in red. (XLS) [file pone.0015499.s008.xls]

## Sheet: key
Sheets	Raw data	Raw Data as retrieved from SMD after filtering for signal over background >1.8 in the channel measuring total RNA (Cy3) derived from the extract (columns C-AU)
	target features	Data for at least 3 mock control experiment, 2 IP with RBPs average 3-fold enriched in IP vs. mock; p<0.01 (Cyber-T, Baysean)

## Sheet: RawData
Oligo ID	Gene Name / Description	Mock IP (3) A||	Mock IP (4) A||	Mock IP (5) A||	Mock IP (6) A||	Mock IP (7) A||	Dfr1 IP (2) B||	Dfr1 IP (3) A||	Dfr1 IP (4) A||	Gre3 IP (2) A||	Gre3 IP (2) B||	Gre3 IP (3) A||	Lap3 IP (2) A||	Lap3 IP (2) B||	Lap3 IP (3) A||	Map1 IP (1) A||	Map1 IP (2) A||	Map1 IP (2) B||	Mdh1 IP (1) B||	Mdh1 IP (3) A||	Mdh1 IP (4) A||	Mdh3 IP (2) B||	Mdh3 IP (3) A||	Mdh3 IP (3)B||	Meu1 IP (1) A||	Meu1 IP (2) A||	Meu1 IP (3)B||	Meu1 IP (3) A||	Pfk2 IP (1) A||	Pfk2 IP (2) A||	Pfk2 IP (3) A||	Phr1 IP (1) A||	Phr1 IP (2)||	Phr1 IP (2)B||	Pot1 IP (2) B||	Pot1 IP (3) A||	Pot1 IP (3) B||	Pre10 IP (1) A||	Pre10 IP (2) A||	Pre10 IP (3) A||	Sti1 IP (4) A||	Sti1 IP (2b, oligo)||	Sti1 IP (3, oligo)||	Ymr1 IP (3) A||	Ymr1 IP (2) B||	Ymr1 IP (3)B||	Dfr1 fold	Gre3 fold	Lap3 fold
YKL068W_ORF	|| NUP100 || mRNA export from nucleus* || structural molecule activity || YKL068W || nuclear pore complex subunit || 1452808	-1	-2.81	-2.16	-0.34	-2.77	4.53	0.14			-0.28	1.37	-1.44	0.32	-4.44	-1.39	-0.08	-0.52	1.75		-0.22	3.1	-0.06	0.69	-1.21	-2.56	0.14	0	-4.73	-0.6	-0.8	-0.99	-0.19	1.08	3.42	-4.54	-0.25		1.25	-1.77	-0.93	1.33	0.56	-1.33	1.69	-0.36	4.151
YBL099W_ORF	|| ATP1 || ATP synthesis coupled proton transport || hydrogen ion transporting ATP synthase activity, rotational mechanism || YBL099W || F1F0-ATPase alpha subunit || 1453807	0.33	-6.31	-4.62	-0.55	-1.99	-1.51	-0.93	-3.54	-0.22	-0.61	-1.11	-2.42	-1.35	-3.53	0.45	-0.18	-1.32	-0.34	-0.92	-0.88	0.39	0.42	0.15	0.15	-3.45	-1.69	-2.15	-1.85	-0.05	-1.41	0.59	-1.78	-1.48	0.19	-0.3	-0.07	-0.4	-0.26	-0.34	-1.75	-0.04	-0.78	-0.39	0.01	-1.1
IGR_CHR01:(COMPLEMENT(166471..166621))_28	|| || || || || YBOX_IGR1000001:NAR001C:NAR001C:chr01.fsa:(complement(166471..166621)):151:bp._28_0 || 1454868	-6.27			-2.59	-1.35	-1.66	1.18			0.44	1.27		0.28			-1.16	0.14	-3.69		-1.31	-0.94	-0.8	-0.2		-0.61	1.32		-1.95	0.65	-1.83		-0.23	-0.1	-0.36		-2.08		-1.88	-0.38	-0.82	0.38	-0.28		-0.75
YMR257C_ORF	|| PET111 || translation || translation regulator activity || YMR257C || translational activator of cytochrome C oxidase subunit II || 1453971	-3.67	0.01	-3.02	-0.26	-3.07	0.39	0.59			-0.59	-0.42	-1.89		-0.86	-0.03	0.1	0.13	0.55		-0.25	0.13	0.44	0.63	-0.76	-1.51	0.65	0.56	-0.57	0.39	-0.24	0.1	2.28	-0.37	-0.1		-0.95		0.76	0.54	-0.75	0.14	0.21	-0.18	0.65	-0.16
YML104C_ORF	|| MDM1 || mitochondrion organization and biogenesis* || structural constituent of cytoskeleton* || YML104C || intermediate filament protein || 1457785	-4.4			-0.39	-2.07	-0.45	0.61			-1.41	1.38		0.23		0.06	0.53		-1.43		-0.59	-0.35	-0.1	0.5	-2.73	-0.57	0.14	-0.17	-1.04		-1.74	-0.19	0.41	0.2	0.04		-2.04		2.42	0.14	0.28	-0.57	0.2	-1.92	-0.5	0.07
YHR161C_ORF	|| YAP1801 || endocytosis || clathrin binding || YHR161C || Yeast Assembly Polypeptide, member of AP180 protein family, binds Pan1p and clathrin || 1452136	-1.24	-3.98	-4.72	-2.25	-2.45	-1.97	0.27	-1.91		-1.91	-1.68	-1.79	-1.97	-3.09	-1.74	-1.88	-3.24	-2.15		-2.26	-1.17	0.15	-0.92	-0.72	-1.71	-2.48	-3.43	-2.17	-1.76	-0.98	-1.76	-1.75	-2.12	-1.41		-2.32	-1.53	-1.68	-2.14	-1.95	-0.52	-0.63	-1.55	-2.36	-1.53
YLR134W_OCH__ORF	|| PDC5 || pyruvate metabolic process* || pyruvate decarboxylase activity || YLR134W || YBOX_OCH1000083:YLR134W_PDC5_SGDID:S0004124_Chr_XII_410724-412415_Ver_ORF_1027_0 || 1450571	-2.59	-3.21	-3.26	-2.5	-2.66	-1.18	-1.56	-2.45	-2.24	-1.66	-2.46	-0.87	-2.29	-2.99	0.51	-0.67	-1.3	-0.62	-2.36	-1.66	-0.34	-0.14	-1.24	0.39	-2.97	-2.54	-1.87	-1.63	-1.06	-1.1	-2.05	-1.77	-2.05	-1.07	-1.81	-1.64		-2.01	-2.04	-1.42	-1.32	-1.61	-0.6	-0.64	-1.04
YKL177W_ORF	|| || || || YKL177W || Hypothetical ORF || 1455070	-1.88	-2.21		-0.52		-0.61	0.32			-1.89						-0.3						0.28	0.71		-2.97			-2.09	0.28	-0.59	0.46			0.04		-1.18		3.06	0.67		0.22	0.29		0.47
YPR161C_ORF	|| SGV1 || protein amino acid phosphorylation* || cyclin-dependent protein kinase activity || YPR161C || CDC28/cdc2 related protein kinase || 1456128	-1.83	-5.2		-1.6	-2.03	-0.77	-1.04	-0.1		-0.99	-0.07	-2.13	-1.14	-1.37	-1.71	-1.66	1.4	-1.41		-1.34	-0.86	-0.75	-0.3	-1.04	-0.84	-1.75	-1.38	-2.02	-0.73	-0.83	-1.04	-1.83	-1.81	-1.58	-1.46	-1.44		-0.52	-0.45	-1.85	1.19	-0.43	-0.99	-1.48	-1.21
YEL076C-A_INT_1	|| || biological_process || molecular_function || YEL076C-A || YBOX_INT1000250:INT_1_YEL076C-A:NC_001137:complement(4323..4601) || 1454187	-0.76	-1.49	-1.48	0.16	-0.88	-0.17	-1.8	-0.72		-0.96	-0.46	-0.09	-0.01	-0.8	0.91	0.97	0.32	0.39	0.35	-0.24	1.09	1.27	0.94	-0.53	1.16	-0.75	-0.75	-0.91	0.19	0.05	-0.32	-0.82	-0.74	-0.08	-0.7	-0.78		-0.54	0.4	-0.54	1.58	-0.13	-0.28	-0.31	-0.81
YDR327W_ORF	|| || || || YDR327W || Protein required for cell viability || 1454165	-1.48	-4.01	-2.4	-2.54	-4.91	-0.8	1.58	-1.35	-2.29	-1.89	-1.63	-2	-1.81	1.7	-1.98	-1.44	-0.77	-1.97	-2.53	-1.62	-1.29	-0.34	-1.62	-2.78	-1.29	-1.46	-2.56	-2.66	-1.56	-1.62	-1.5	-2.25	-2.7	-1.13	-1.68	-2.56	-3.55	-2.55	-2.23	-2.19	-1.2	0.29	-1.65	-1.18	-0.68	2.878
YDL228C_ORF	|| || || || YDL228C || Hypothetical ORF || 1455424	-0.8	-2.07	-1.08	-1.09	-1.56	0.09	2.25	-0.61		-0.66	-1.12	1.23	0.91	-0.27	1.44	0.3	1.09	-0.2		-0.55	0.45	1.1	0.41	0.13	-0.25	-0.35	0.1	-1.2	-1.01	-0.38	-0.73	-0.83	0.3	-0.09		-0.79		1.64	1.01	-1.12	1.95	1.86	-0.48	-0.02	-0.28	1.89667
YOR116C_TIL_3301_3600_126_ORF	|| RPO31 || transcription from RNA polymerase III promoter || DNA-directed RNA polymerase activity || YOR116C || YBOX_TIL1000304:TIL_YOR116C_3301_3600_126_0 || 1453383	-2.6	-2.73		-2.36	-3.27	-2.47	-0.81	-0.8		-2.51	-2.29	-2.18	-1.55	-2.4	-0.89	-0.51	-1.51	-2.04		-1.86	-0.81	-0.52	-0.98	-2.32	-1.63	-2.75	-2.79	-3.07	-1.51	-2.53	-2.69	-3.11	-3.09	-1.41		-2.58		-2.14	-2.04	-1.22	0.07	-0.61	-3.31	-2.25	-2.88
YLR452C_ORF	|| SST2 || signal transduction* || GTPase activator activity || YLR452C || GTPase activating protein (GAP)|RGS (regulator of G-protein signalling) family || 1457442	-0.53	-2.53		-2.36	-2.02	-1.01	-1.99	-1.27		-1.11	-1.76	-2.91		0.1	-1.27	-0.25	-0.74	-0.46		-2.11	-0.03	0.19	0.11	-1.57	-1.42	-1.43	-2.22	-1.21	-1.32	-1.07	-1.33	-1.04	-1.74	-0.74	-1.99	-1.56		-0.74	0.22	0.22	2.94	-0.05	-1.18	-1.13	-0.97
YNL014W_ORF	|| HEF3 || translational elongation || ATPase activity* || YNL014W || Translation elongation factor 3 (EF-3) || 1451485	-2.31	-2.19	-4.28	-3.61	-2.88	-1.79	1.78	-2.59		-1.17	-1.73	-1.57	-1.73	-1.77	-1.05	0.01	-1.28	-2.49		-2.25	-2.07	0.11	-1.41		-0.66	-1.5	-2.74	-3.15	-2.23	-2.92	-2.33	-1.64	-1.39	-2.44		-2.07		-3.81	-2.61	-1.45	0.08	0.55	-1.9	-2.16	-0.85	2.18733
YBL053W_ORF	|| || || || YBL053W || Hypothetical ORF || 1454884	0.81	-2.37	-2.08	-1.03	-0.79	0.53	2.15	-0.45		-0.8	-0.61	-0.2	-0.81	-0.75	-0.99	-0.23	-1.59	-0.28		-0.04	0.47	0.99	0.97		2.33	-1.02	-1.11	0.08	-0.63	1.04	-0.29	-1.68	-1.05	-0.13		0		0.26	-0.11	-0.3	2.39	0.86		0.15	0.04
YHR203C_OCH_US100_ORF	|| RPS4B || translation* || structural constituent of ribosome || YHR203C || YBOX_OCH1000237:US100_YHR203C_YHR203C_Chr08_(complement(505530..505629))_100_bp._0_0 || 1455955	-0.78	-2.72	-2.54	-2.44	-2.33	-0.59	-0.74	-1.46	-2.64	-1.28	-1.23	-2.85	-3.35	-0.42	1.27	-0.4	-0.97	-0.17		-0.89	0.14	0.07	-1.01	0.35	-0.38	-2.34	-0.72	-0.77	-1.35	-0.71	-1.65	-2.65	-2.52	-0.24	-0.89	-0.22	2.7	-0.66	0.08	-0.58	-0.68	-0.57	0.34		0.48
YPL246C_ORF	|| RBD2 || biological_process || molecular_function || YPL246C || rhomboid protease || 1452368	-1.76	-2.39	-1.2	-1.59	-1.14	0.07	-0.55	-1.83	-1.24	-0.68	-1.21	-0.82	-0.64	-1.08	0.23	0	-0.13	-1.12	-4.94	-0.69	0.1	0.37	0.29	-0.19	-1.59	-0.71	-1.42	-1.48	-0.89	-0.27	-0.93	-0.9	-2.25	-0.52	4.84	-1.38	-2.62	0.24	-0.33	-0.82	-0.13	-0.17	-0.34	-0.95	-0.58
YLR310C_ORF	|| CDC25 || replicative cell aging* || Ras guanyl-nucleotide exchange factor activity || YLR310C || adenylate cyclase regulatory protein || 1450368	-2.62	-4.45	-1.39	-2.07	-1.62	-0.07	-1.63			-1.68	-1.6	-1.18	-1.66	-1.82	-0.73	0.81	-1.15	-0.2		-2.19	-0.09	-0.79	-0.81	-1.98	-3.11	-2.27	-3.73	-0.83	-1.65	-2.01	-3.26	-2.36	0.57	-0.65		-2.03		0.9	-0.64	-1.57	-0.03	-0.73	-2.3	-0.38	0.34
YKL184W_ORF	|| SPE1 || pantothenate biosynthetic process* || ornithine decarboxylase activity || YKL184W || ornithine decarboxylase || 1454460	-1.03	-2.9	-2.47	-1.08	-1.63	0.1	-0.69	-0.96	-0.94	-0.73	-2.35		0.22	-2.05	0.92	-0.01	0.8	-0.55		-0.93	0.15	-0.09	0.07	-0.14	-0.36	-1.84	-2	-1.07	-1.1	0.64	-0.6	-0.53	-0.57	-0.74	-1.36	-1.04	-0.31	-1.75	-1.82	-1.12	-0.3	-0.19	-0.62	-0.11	-0.94
YLL066C_ORF	|| || biological_process || helicase activity || YLL066C || Hypothetical ORF || 1456178	-1.2	-2.71	-1.8	-1.08	-2.03	-1.31	-0.94	-2		-1.72	-1.34	-1.1	-1.19	-0.56	0.07	0.09	-0.18	-1.13	-1.66	-1.57	0.27	0.1	-0.13	-1.37	1.18	-1.69	-1.56	-0.74	-1.55	-1.84	-0.73	-3.97	-0.54	-0.85	-6.32	-1.2	-2.54	-0.33	-0.68	-0.73	1.98	0.29	-1.07	-1.24	-2.07
YFL066C_ORF	|| || biological_process || molecular_function || YFL066C || Hypothetical ORF || 1455323	-1.06	-2.42	-0.59	-0.33	-0.65	-0.71	-1.94	-1.2	-2.76	-1.36	-0.96	-2.08	-0.15	0.09	0.61	1	0.29	-0.5	-2.03	-0.93	1.07	0.76	0.65	-1.37	1.64	-1.56	-1.44	-1.57	-0.94	-0.71	-0.5	-1.01	-1.37	0.04	-2.65	-0.93	-2.05	-1.78	-0.43	-0.72	1.94	-0.01	-0.94	-0.64	-1.58
YDL140C_ORF	|| RPO21 || transcription from RNA polymerase II promoter || DNA-directed RNA polymerase activity || YDL140C || RNA polymerase II core subunit || 1451361	-1.86	-3.3	-3.58	-2.69	-2.59	-1.35	-2.5	-2.9	-1.79	-2.64	-2.37	-1.5	-1.75	-2.64	-0.93	-1.03	-1.43	-1.22	-1.24	-2.12	-0.55	-1.23	-1.16	-0.74	-2.4	-1.84	-2.18	-1.97	-2.34	-1.44	-2.52	-2.6	-2.55	-1.29	-1.72	-1.44	-2.03	-2.57	-2.61	-0.14	1.97	-1.05	-0.67	-1.32	-1.22
YLR276C_ORF	|| DBP9 || ribosome biogenesis and assembly* || ATP-dependent RNA helicase activity || YLR276C || Dead-Box Protein 9 || 1455392	-1.31	-3.76		-1.54		-1.15	-1.03			-0.93	-1.35	-3.42	-0.17	-2.6	-0.88	0.28	-1.18	-1.51	-2.42	-1.3	-0.52	-0.42	-0.21	-0.39	1.71	0.57	-2.1	-1.43	-1.78	-1.1	-1.55	-1.98	-1.71	-0.22	-1	-1.35		0.98	-0.25	-0.04	-0.97	-0.87	-1.17	-1.32
IGR_CHR15:(960694..961694)_408	|| || || || || YBOX_IGR1000233:gOR09_1:gOR09_1:chr15.fsa:(960694..961694):1001:bp._408_0 || 1452884	-1.62	-3.72	-2.85	-1.13	-1.18	-1.17	-1.36	-1.06	-2.19	-1.79	-1.54	-0.19	-0.05	-0.15	-1.16	-0.21	-0.01	-1.12	-1.54	-0.65	-0.73	0.06	-0.2	-0.81	0.66	-1.41	-1.93	-0.87	-0.75	0.25	-1.32	-1.07	-2.66	-2.37		-1.3		-1.58	-2.25	-1.11	-0.3	-1.48	-1.28	-1.38	-1.8
YPL231W_ORF	|| FAS2 || fatty acid biosynthetic process* || phosphopantetheinyltransferase activity* || YPL231W || fatty acid synthase alpha subunit || 1451419	-3.02	-3.97	-3.9	-2.5	-2.62	-1.94	-3	-0.89		-1.97	-1.84	-1	-2.6	-2.04	-1.57	-0.83	0.14	-1.6	-3.27	-2.08	-0.93	-1.65	-1.63	-1.31	-2.84	-1.99	-1.78	-2.31	-1.03	-2.01	-1.99	-1.87	-1.55	-0.86	-3.03	-2.48		-0.74	0.38	-1.52	-2.08	-1.48	-2.23	-1.61	-1.65
YLR248W_ORF	|| RCK2 || protein amino acid phosphorylation* || protein serine/threonine kinase activity || YLR248W || Serine/threonine protein kinase || 1454755	-2.85	-1.33		-2.8	-2.08	-0.99	-1.34	0.13	-4.32	-2.57	-1.83	-1.08	-0.45	2.19	-0.41	-1.09		-0.63		-1.81	0.23	-0.88	-0.81	-0.47	-1.23	-0.67	-2.05	-2.95	-2.04	-1.62	-1.73	-1.36	-1.84	0.1		-1.75	-1.66	0.32	-3.1	-2.21	-0.99	-0.9	-0.91	-0.47	1.1
YBL112C_ORF	|| || biological_process || molecular_function || YBL112C || Hypothetical ORF || 1456211	-1	-1.56	-0.5	-0.12	-0.45	-0.46	-1.27	0.23	-2.88	-0.7	-0.29	-0.96	-0.12	-0.67	0.92	1.06	0.98	-0.2	-1.74	-0.53	1.37	0.65	1.12	-1.22	1.91	-0.78	-0.86	-1.38	-0.37	-0.58	0.76	0.42	-0.77	1.11	-2.5	-0.61	-1.84	-1.37	0.1	-0.58	2.26	0.31	-0.84	-0.57	-1.2
YBL113C_OCH__ORF	|| || biological_process || helicase activity || YBL113C || YBOX_OCH1000239:YBL113C_YBL113C_SGDID:S0002153_Chr_II_2658-280_RC_Unc_ORF_593 || 1456825	-0.87	-2.21	-1.54	-0.54	-0.96	-0.5	-3.7	-1.45	-1.81	-1.88	-1.59	-0.45	-1.24	-1.67	0.81	0.76	0.69	-0.47	-0.74	-1.12	1.23	0.49	-0.09	-0.94	1.38	-1.81	-1.34	-1.44	-0.91	-1.01	-0.89	-1.63	-1.83	0.08	-2.03	-1.6	-1.52	-1.13	-0.41	-0.78	2.04	-0.08	-0.82	-0.8	-1.59
YML106W_ORF	|| URA5 || 'de novo' pyrimidine base biosynthetic process || orotate phosphoribosyltransferase activity || YML106W || orotate phosphoribosyltransferase 1 || 1456037	-0.66	-0.84	-2.49	-0.28	-0.68	0.07	-1.65	-0.72	-1.15	-0.2	-0.54	1.14	0.19	-1.21	2.27	0.88	0.78	0.59	0.3	-0.28	1.12	0.46	0.59	0.98	0.05	-0.14	0.07	-0.07	0.32	0.57	-0.57	-0.98	-0.52	1	0.36	0.4	-1.43	0.68	0.55	0.33	-0.38	-0.15	0.56	0.16	-0.02
YER165W_ORF	|| PAB1 || regulation of translational initiation || poly(A) binding || YER165W || poly(A) binding protein || 1452462	-1.57	-2.42	-3.5	-1.85	-2	-1.1	-2.67	-1.66	-1.82	-1.78	-2.24	-1.1	-1.86	-1.46	0.56	-0.21	-1.44	-0.7	-1.09	-1.4	-0.23	-0.81	-0.65	0.18	-1.74	-1.62	-1.86	-1.44	-1.19	-0.78	-2.1	-1.74	-1.91	-0.94	-0.92	-1.55	0.37	-0.87	-1.12	-0.7	-1.38	-1.63	-0.53	-0.89	-0.97
YFL064C_ORF	|| || biological_process || molecular_function || YFL064C || Hypothetical ORF || 1457080	-0.51	-0.99	-0.89	-0.11	-0.31	-0.17	-2.06	-0.77	-1.61	-0.82	-0.39	-0.11	-0.13	0.45	0.88	1.77	1.07	0.27	-0.06	-0.02	1.49	1.32	0.61	-0.17	1.55	0.46	-0.89	-0.54	0.42	-0.15	0.09	0.31	-0.74	-0.48	-1.23	-0.61	-2.59	0.35	-0.41	-0.1	0.68	0	0.05	-0.23	-1.39
YLL051C_AAA_26_NCR	|| FRE6 || biological_process || ferric-chelate reductase activity || YLL051C || POLYA_DS100_YLL051C_chr=XII_(complement(37045..37144))_26:YBOX_AAA1000027 || 1458251	-1.74	-2.92	-1.86	-1.98	-2.06	-1.16	0.61	-1.69		-0.95	-1.56	-2.39	-1.42	-2.61	0.78	-1.19	-1.6	-0.86		-1.41	-0.78	-0.17	-0.28	-1.75	-1.34	-0.57	-2.14	-1.6	-1.84	-1.49	-1.69	-1.82	-2.14	-1.77		-1.65		-2.22	-2.76	-1.58	-0.82	-0.98	-0.43	-1.35	-0.88
YKR093W_ORF	|| PTR2 || peptide transport* || peptide transporter activity* || YKR093W || peptide transporter || 1457920	-0.03	-0.91	-1.07	-0.98	-2.58	-0.56	-0.14			0.33	1.23			0.72		0.8		-0.21		-0.74	0.51	0.45	0.77	-1.55	-0.42	-1	-0.62	-0.24	0.44	-0.06	-0.45	0.29	-2.01	0.76		-0.76		1.26	0.77	1.13	-0.27	0.25	-0.49	-0.09	-0.81
Q0045_ORF	|| COX1 || aerobic respiration* || cytochrome-c oxidase activity || Q0045 || cytochrome c oxidase subunit I || 1458441	-0.84	-1.71	-3.01	-1.3	-2.29	-0.1	-1.77	-1.4	-0.45	-1.24	-1.05	-1.05	-0.61	-1.51	1.49	1.08	1.73	4.08	2.58	0.73	-0.58	0.41	-0.25	-0.11	-4.36	-2.05	-1.76	-0.25	-2.02	-1.28	-1.34	-2.08	-1.95	-0.19	-0.67	-1.85	-0.59	-3.02	-1.36	-0.63	-0.95	-1.08	-0.28	-0.91	-1.11
YLL008W_ORF	|| DRS1 || ribosome biogenesis and assembly* || ATP-dependent RNA helicase activity || YLL008W || ATP dependent RNA helicase (putative) || 1456686	-1.56	-3.73		-2.29	-2.27	-2.01	-1.76	-3.3		-1.94	-4.21	-2.19	-0.76		-0.98	-1.42	-2.62	-1.83		-0.97	-1.07	-0.71	-0.57	-1.29	2.9	-1.41	-1.36	-1.64	-1.25	-1.31	-1.96	-1.16	-3.43	-1.82	-2.98	-2.16		0.48	-0.73	-1.44	-0.93	-1.8	-1.52	-1.51	-1.91
YLR467W_ORF	|| YRF1-5 || telomere maintenance via recombination || DNA helicase activity || YLR467W || Y'-helicase protein 1 || 1458368	-0.54	-2.87	-1.31	-2.38	-1.63	-1.11	-0.55	-1.5		-1.43	-0.9	-2	-0.38	0.03	-0.07	0.03	0.26	-0.94	-1.48	-1.54	-0.24	0.02	0	-3.86	1.34	-0.1	-1.86	-1.25	-1.81	-0.56	-0.3	-1.27	-0.87	-0.57	-1.64	-0.58		-1.42	0.04		2.1	0.11	-1.05		-1.6
YBL052C_ORF	|| SAS3 || chromatin silencing at telomere* || H3/H4 histone acetyltransferase activity || YBL052C || SAS3 for Something about silencing, gene 3. Influences silencing at HMR. || 1455784	-2.47	-0.97	-2.62	-1.94	-1.79	-0.23	0.25	-0.64		-0.21	0.12	-2.47	-1.4	0.7	-0.82	-0.93		-1.38		-1.39	-0.05	-0.31	-0.5	-1.35	1.4	-0.51		-1.15	-1.23	-1.26	-1.99	0.61	-2.47	-1.32		-1.12		-2.79	0.24	-0.06	0.8	-0.05	-1.62	-1.16	-0.5	1.75133
YDR457W_TIL_4201_4500_60_ORF	|| TOM1 || regulation of cell size* || ubiquitin-protein ligase activity || YDR457W || YBOX_TIL1000232:TIL_YDR457W_4201_4500_60_0 || 1456046	-3.06	-2.21	-3.06	-2.67	-3.34	-2.18	-1.7	-2.68		-1.99		-2.86	-2.24	0.52	-1.58	-1.07	-2.33	-2.02		-2.36	-1.28	-1.17	-1.24	-3.17	-1.51	-2.13	-3.21	-2.28	-1.59	-2.78	-2.3	-0.34	-2.35	-1.56		-2.34		0.02	0.3	-1.54	-0.53	-1.45	-3.67	-2.24	-2.97
YMR182C_ORF	|| RGM1 || negative regulation of transcription from RNA polymerase II promoter || RNA polymerase II transcription factor activity || YMR182C || transcriptional repressor with proline-rich zinc fingers (putative) || 1452612	-0.94	-1.5	-2.43	-1.77	-0.76	0.52	-0.43	-0.09		-0.96	-0.19	-1.56	-0.59	-4.78	-1.49	-0.92	-0.69	0.57		-0.1	0.23	0.78	-0.55	0.39	1.45	-0.85	-0.45	-0.92	-0.47	-0.27	-0.55	-0.25	-1.17	-0.58		-1.2	-1.51	-1.39	-0.86	-1.51	0.21	-0.14	0.62	0.03	-1.12
YLR384C_ORF	|| IKI3 || regulation of transcription from RNA polymerase II promoter* || molecular_function || YLR384C || Subunit of RNA polymerase II elongator complex, which is a histone acetyltransferase; involved in maintaining structural integrity of the complex; iki3 mutations confer resistance to the K. lactis toxin zymocin || 1458508	-1.66	-3.12	-2.27	-1.65	-2.32	-1.97	-1.7	-1.39	-3.79	-1.67	-0.82	-1.91	-0.7	-1.02	-0.26	-0.71	-1.02	-1.04	-2.48	-1.85	-0.75	-1.06	0.02	-1.24	0.17	-1.33	-2.11	-0.89	-1.38	-1.66	-1.73	0.31	-1.07	-1.48	-0.79	-1.02		-0.46	-1.4	-1.33	-1.51	-1.17	-1.31	-1.56	-1.61
YMR237W_ORF	|| BCH1 || Golgi to plasma membrane transport* || molecular_function || YMR237W || Hypothetical ORF || 1451875	-1.78			-2.61	-1.85	-1.15	-0.05	0.03		-0.06	-1.05	-2.98		-0.79	-0.23	-0.95	-0.6	-1.34		-2.53	-0.48	-0.95	0.01	-1.17	-3.79	-0.26	-1.98	-1.56	-1.76	-1.55	-1.89		-0.35	-1.78				0.52	0.3	-1.69	-0.99	-0.78	-1.8	-1.59	-1.04
YLR249W_ORF	|| YEF3 || translational elongation* || translation elongation factor activity || YLR249W || Translation elongation factor 3 (EF-3) || 1453872	-2.2	-3.5	-3.63	-2.77	-2.79	-2.19	-4.04	-2.45	-2.74	-2.23	-2.42	-1.22	-2.52	-3.29	-0.5	-0.7	-0.32	-1.54	-1.57	-2.1	-0.71	-1.62	-1.81	-0.72	-0.98	-2.75	-2.19	-2.02	-2	-2.19	-2.5	-2.16	-2.04	-1.37	-3.35	-2.21		-2.21	-2.86	-1.69	-1.5	-2.07	-1.68	-1.86	-1.46
YBR025C_ORF	|| OLA1 || ATP catabolic process || ATPase activity || YBR025C || Hypothetical ORF || 1456156	-2.06	-2.83	-3.29	-2.04	-2.2	-1.32	-1.93	-2.1	-2.66	-1.96	-1.58	-1.95	-1.96	-0.55	0.42	0.02	-1.63	-0.9		-2.12	-0.45	-0.87	-1.34	0.03	0.02	-1.92	-2.34	-1.83	-1.41	-1.39	-1.85	-1.69	-2.98	-1.12	-2.91	-1.63	-0.93	-0.67	-1.61	-1.55	-1.33	-1.1	-0.83	-0.89	-0.94
YHR016C_INT_1	|| YSC84 || endocytosis* || molecular_function || YHR016C || YBOX_INT1000160:INT_1_YHR016C:NC_001140:complement(138233..138400) || 1455967	-1.31	-1.11	-2.6	-1.09	-1.42	-0.47	1.3	-0.3		-1.44	-1.15	-2.03	-0.88	-0.66	0.49	-1.23	-1.55	-0.24		-1.05	0.24	0.46	-0.45	0.42	-2.13	-1.4	-1.55	-0.98	-0.84	-0.23	-1.07	-1.16	-1.15	-0.63	-2.59	-1.06		-0.55	-1	-1.05		-0.05		-0.55	-0.88
YLR044C_ORF	|| PDC1 || pyruvate metabolic process* || pyruvate decarboxylase activity || YLR044C || pyruvate decarboxylase || 1457660	-1.65	-2.92	-3.11	-2.04	-2.9	-1.13	-3.5	-2.21	0.42	-0.85	-1.58	-0.66	-2.3	-2.72	0.66	-0.88	-1.13	-0.06	-0.33	-1.09	-0.01	-1.05	-1.76	0.99	-3.05	-2.19	-1.48	-1.56	-1.78	-1.51	-1.53	-1.28	-1.66	-2	-1.66	-1.41	0.63	-2.31	-2.31	-1.62	-0.33	-0.88	0.82	-0.82	-1.02		1.854
YBL076C_ORF	|| ILS1 || translation || isoleucine-tRNA ligase activity || YBL076C || isoleucine-tRNA synthetase || 1454376	-2.13	-3.56	-2.5	-3.08	-2.85	-2.24	-2.03	-2.31	-2.39	-2.05	-1.99	-1.62	-2.53	-1.4	-1.06	-0.6	-1.96	-1.55	-2.26	-1.53	-1.12	-1.4	-1.22	-0.77	-1.28	-1.81	-1.82	-2.08	-2.11	-2.05	-1.95	-2.03	-1.95	-2.13	-2.92	-1.92		-1.57	-1.3	-2.4	-1.52	-1.24		-1.87	-2.03
YER036C_ORF	|| ARB1 || ribosome biogenesis and assembly* || ATPase activity, uncoupled || YER036C || Hypothetical ORF || 1456735	-1.68	-2.06	-2.27	-2.12	-2.06	-0.76	-2.22	-4.1	-1.38	-1.38	-1.58	-1.09	-1.77	-1.46	0.17	-0.56	0.14	-0.61	-1.26	-1.38	0.15	-0.93	-0.64	-0.11	0.16	-1.82	-0.91	-1.47	-1.61	-1.14	-1.59	-2.33	-1.88	-0.36	-1.17	-1.17	-0.45	-0.99	-0.64	-1.68	-1.03	-1.12	-0.94	-0.22	-0.69
YLR134W_ORF	|| PDC5 || pyruvate metabolic process* || pyruvate decarboxylase activity || YLR134W || pyruvate decarboxylase || 1456917	-2.04	-2.88	-3.36	-2.54	-3.05	-1.35	-3.79	-2.89	-1.08	-0.94	-2.17	-1.3	-2.33	-3.2	0.43	-1.36	-1.85	-0.66	-0.46	-1.81	-0.64	-1.49	-1.53	1.27	-3.18	-2.46	-1.88	-1.87	-1.56	-1.54	-2.23	-1.46	-1.94	-0.85	-1.25	-1.79	0.84	-2.43	-2.3	-2.1	-0.81	-0.76	0.28	-1.19	-1.3
YOR116C_TIL_601_900_47_ORF	|| RPO31 || transcription from RNA polymerase III promoter || DNA-directed RNA polymerase activity || YOR116C || YBOX_TIL1000309:TIL_YOR116C_601_900_47_0 || 1452126	-0.85	-1.73		-1.34	-2.27	-1.44	-0.86	-2.17		-0.07	1.62	-2.91	-0.35	-0.04	-0.7	0.26		-0.27		-1.04	-0.26	0.21	0.06	-1.07	1.44	1.26	-1.3	-2.27	-0.15	-1.09	0.67	-0.45	-2.1	-0.35	-3.27	-1.02		1.11	0.46	0.46	-0.09	-1.02	-2.74	-2.65	-0.31
YHR135C_ORF	|| YCK1 || protein amino acid phosphorylation* || casein kinase I activity || YHR135C || casein kinase I homolog || 1458349	-1.8	-2.28	-3.14	-1.55	-2.4	-1.65	-0.2	-2.3	-1.04	-1.33	-1.44	-1.61	-2.06	-2.59	-0.03	-1.64	-3.35	-1.22		-1.68	-0.98	-0.28	-0.83	-0.3	-2.46	-2.25	-2.15	-1.75	-1.04	-0.78	-1.59	-1.92	-2.83	-1.21	-5.28	-1.99	-1.08	-2.25	-1.87	-1.6	-0.67	-0.87	-0.84	-1.11	-1.21
YJL225C_ORF	|| || biological_process || helicase activity || YJL225C || Hypothetical ORF || 1450314	-1.17	-1.73	-0.81	-0.64	-0.83	-1.14	-1.24	-0.97	-4.8	-1.8	-1.44	-1.21	-0.13	-0.97	0.18	0.26	0.04	-1.19		-1.3	0.43	0.76	0.31	-1.39	1.04	-1	-1.47	-1.42	-1.31	-1.01	-1.02	-0.53	-1.83	-0.54	-3.22	-0.63	-2.29	-0.19	-0.22	-0.64	2.52	0.55	-1.1	-1.3	-1.13
YHL049C_OCH_DS100_ORF	|| || biological_process || molecular_function || YHL049C || YBOX_OCH1000151:DS100_YHL049C_YHL049C_Chr08_(complement(3625..3724))_100_bp._14_0 || 1455613	-0.48	-0.98	-0.39	0.02	-0.48	0.25	-1.39	-0.17	-1.04	-1.19	-0.4	-0.21	-0.41	-0.8	1.11	1.47	2.06	0.22	-0.01	-0.17	1.3	1.14	0.77	-1.08	1.48	-0.43	-1.07	-1.47	-0.69	-0.08	0.19	0.05	-0.93	0.09		-1.18	-1.93	-1.43	-1.24	-0.6	0.91	0.01	-0.44	0.04	-1.31
YBL113C_ORF	|| || biological_process || helicase activity || YBL113C || Hypothetical ORF || 1455321	-1.14	-2.16	-2.43	-0.55	-1.03	-1.26	-0.84	-1.58		-1.5	-1.45	-1.17	-0.38	-1.81	0.15	0.41	-0.43	-0.94	-1.88	-1.51	0.21	0.15	-0.15	-1.19	1.07	-0.42	-1.51	-1.89	-1.06	-1.06	-1.79	-1.13	-1.02	-1.4	-4.12	-1.14	-4.56	-0.14	-0.63	-0.6	1.69	0.67	-1.3	-1.04	-1.51
YDR161W_ORF	|| || ribosome biogenesis and assembly || molecular_function || YDR161W || interacts with PP2C || 1454428	-1.41	-2.74	-0.28	-1.75	-1.96	-0.4	-0.39	-0.35	-1.89	-0.73	-0.04	-2.48	0.93	0.7	-1.19	-0.54	-0.54	0.03		-0.3	0.24	0.02	-0.55	-0.16	2.19	-2.26	-0.62	-0.93	-0.99	-1.75	-1.05	-0.52	-0.7	-0.76		-1.92		-1.11	-1.56	-1.66	-0.61	-0.18	-0.68	0.19	0.53
YPL020C_ORF	|| ULP1 || G2/M transition of mitotic cell cycle* || cysteine-type peptidase activity* || YPL020C || Smt3-specific protease || 1454922	-1.39	-1.41	-2.87	-2.04	-1.23	-0.78	-0.04	0.41		-0.87		-2.59	-0.47		-0.72	-0.54	-1.03	-1.04		-1.41	-0.29	0.33	-0.81	-0.87	-0.05	-0.01	-1.38	-1.77	-1.06	-0.91	-1.48	-1.66	-2.43	-1.11		-1.28		0.11	-0.86	-0.89	-0.13	-0.67		-0.59	-1.27	1.65133
YLR278C_ORF	|| || biological_process || molecular_function || YLR278C || Hypothetical ORF || 1453618	-1.89		-1.13	-2.64	-1.74	-0.28	-0.07	1.03		-0.89	0.46	-3.63	-0.38	1.15	-1.95	-0.53	-1.66	-1.71		-1.55	-0.32	-0.71	0.07	-2.05	-2.6	-0.17	-0.91	-0.28	-0.23	-1.29		-0.58	-0.77	-0.88		-3.37		0.53	-0.3	-0.62	-0.62	-0.18	-1.92	-1.31	-0.4	2.07667
YMR273C_ORF	|| ZDS1 || mRNA export from nucleus* || protein binding || YMR273C || Negative regulator of cell polarity || 1450996	-2.09		-1.86	-1.61	-0.88	0.03	-0.34	-0.21		-0.41	-1.03	-2.36	0.72	-1.09	-0.63	-0.26	-0.09	-0.99		-0.57	-0.02	-0.08	-0.18	-1.69	-0.18	-0.34	-0.94	-1.77	-0.55	-0.26	-0.29	-0.49	-1.89	-0.78		-1.78		-2.54	0.65	-0.93	-0.54	-0.51	-1.65	-0.72	-0.77
YDL186W_ORF	|| || biological_process || molecular_function || YDL186W || Hypothetical ORF || 1450281	-0.91	-2.5	-2.34	-1.26	-1.59	-1.44	1.52	-1.97		-1.5	-1.18	-0.63	-1.15	-2.38	-1.27	-1.59	-2.24	-1.32		-1.72	-0.96	0.77	-0.44	-3.64	-0.47	-1.92	-2.12	-1.63	-1.28	-0.36	-1.42	-2.07	-2.15	-1.2	-0.68	-2		-1.76	-0.86	-1.57		0.03	-0.34	-1.41	-1.21
Q0075_ORF	|| AI5_BETA || biological_process || molecular_function || Q0075 || Protein of unknown function, encoded within an intron of the mitochondrial COX1 gene; translational initiation codon is predicted to be ATA rather than ATG || 1455804	-1.13	-2.78		-1.87	-2.7	-0.72	-0.34	-0.9	-0.97	-1.3	-1.38	-3.42	-1.64	-0.96	1.18	1.82	2.99	3.06	1.35	0.27	-1.74	-0.17	-1.2	-1.49	-5.03	2.61	-2.02	-0.99	-1.99	-1.76	-0.1	-2.08	0.17	-1.33		-2.85	-2.66	-2.62	-2.26	-1.14	-1.81	-1.27	-1.51	-1.63	-1.81
Q0065_INT_2	|| AI4 || RNA splicing* || endonuclease activity || Q0065 || YBOX_INT1000072:INT_2_Q0065:NC_001224:18992..20507 || 1456325	-2.19	-2.77	0.08	-2.34	-2.65	-0.26	-1.41	1.6	-3.02	-1.82	-2.79	-3.77	-3.48	0.34	0.9	1.84	0.58	3.56	1.45	0.24	-0.93	0.18	-1.29	-0.89	-4.57	-2.78	-2.37	-1.79	-1.94	-2.7	0.67	-1.04	-1.93	-0.29	-2.59	-1.51	-2.11	0.06	-1.14	-1.58	-1.76	-1.84	-1.02	-1.14	-2.65	1.95067
Q0070_INT_4	|| AI5_ALPHA || movement of group I intron || endonuclease activity || Q0070 || YBOX_INT1000070:INT_4_Q0070:NC_001224:20985..21994 || 1450127	-0.85	-2.61	-3.48	-2.72	-2.99	-0.45	-2.46	0.8	-1.47	-2.31	-1.69	-2.85	-5.74	-1.88	1.16	1.31	0.2	3.88	1.4	0.29	-0.67	-0.62	-1.75	-1.59	-5.15	-2.4	-3.8	-1.77	-2	-2.95	-0.01	-2.22	-2.26	-0.92	-2.27	-2.12	-2.52	-1.87	-1.18	-1.17	-1.49	-2.18	-1.41	-1.47	-0.81
Q0045_JXN_EI_5_ORF	|| COX1 || aerobic respiration* || cytochrome-c oxidase activity || Q0045 || YBOX_JXN1000017:JXN_EI_5_Q0045:NC_001224:22207..22286 || 1455545	-0.99	-1.75	0.1	-2.01	-0.62	1.11	-3.38	0.03	-1.09	-0.96	-2.6	-1.17	-0.41	-2.41	1.38	1.01	1.56	4.34	1.49	1.88	-0.59	-0.71	-0.99	-1.11	-3.94	-2.55	-4.8	-0.44	-2.11	-1.17	-0.9	-2.73	-2.82	-0.68	-1.58	-1.53	-3.65		-0.46	-1.54	-1.75	-2	-1.85	-0.17	-1.55
Q0045_JXN_IE_5_ORF	|| COX1 || aerobic respiration* || cytochrome-c oxidase activity || Q0045 || YBOX_JXN1000018:JXN_IE_5_Q0045:NC_001224:23572..23651 || 1452575	-1.07	-1.44	-3.04	0.28	-0.69	0.74	-2.49	-1.5	-0.36	-1.26	-2.81	-0.81	0.1	-2.22	1.27	1.24	2.02	4.01	2.06	1.46	0.51	-0.31	-0.42	0.19	-4.78	-1.49	-2.46	-1.69	-2.49	0.07	-0.45	-2.84	-2.47	-0.62	-0.97	-1.81	-1.94	-2.47	0.4	-1.16	-0.86	-1.17	-0.77	-1.04	-1.66
Q0065_ORF	|| AI4 || RNA splicing* || endonuclease activity || Q0065 || I-SceII endonuclease activity|encoded by the aI4 intron || 1456696	-1.41	-1.77	-1.59	-1.86	-3.02	1.17	-2.54	-1.02	-1.13	-1.06	-2.46	-2.44	-2.74	-2.49	0.89	0.5	2.97	3.68	1.94	0.33	-1.24	-0.7	-0.62	-1.68	-4.69	-3.47	-2.51	-0.01	-2.98	-2.61	-2.24	-1.02	-1.51	-1.05	-1.09	-2.4	-2.43	-3.92	-0.69	-1.94	-1.43	-2.15	-1.57	-0.85	-1.78
YKR042W_TIL_10_147__ORF	|| UTH1 || mitochondrion organization and biogenesis* || molecular_function || YKR042W || YBOX_TIL1000157:TIL_YKR042W_UTH1_10_147 || 1457327	0.16	-0.11	1.41	0.88	2.1	2.01		1.69		0.14	2.61		1.4	1.11		5.39	5.26	2.21		0.62	1.9		0.3	2.03	3.49	2.2		0.67	0.14	0.68	1.72	0.58	1.43	2.17		0.27		2.06	0.94	1.45	0.67	1.02	0.85	1.31	0.6
YKR042W_TIL_9_281__ORF	|| UTH1 || mitochondrion organization and biogenesis* || molecular_function || YKR042W || YBOX_TIL1000156:TIL_YKR042W_UTH1_9_281 || 1458009	-3.72	1.44	1.18	1.43	0.86	2.09		1.65		0.78	1.92					1.92	5.94	1.12		1.69	1.9		0.17		2.78	2.27	2.28	0.53	0.78		1.28	0.68	1.57	1.91		0.64		1.41	1.51			1.49	1.79	1.37	0.7
Q0055_ORF	|| AI2 || RNA splicing || RNA binding* || Q0055 || endonuclease (putative)|intron-specific reverse transcriptase activity|maturase aI2 || 1457573	0.88	-0.08	-3.1	-1.32	-0.78	-0.42	-1.19	-1.81	1.38	-0.77	-0.58	0.44	0.02	-0.67	2.39	2.05	3.12	4.38	2.78	1.59	-1.11	0.69	-0.5	0.89	-2.73	-1.51	-1.3	-0.55	-1.04	-0.85	0.39	-1.5	-0.55	-0.33	0.9	-1.19	0.46	-1.48	-0.85	0.24	-0.98	-0.07	0.86	-0.49	0.42
YOR116C_TIL_26_0__ORF	|| RPO31 || transcription from RNA polymerase III promoter || DNA-directed RNA polymerase activity || YOR116C || YBOX_TIL1000179:TIL_DS100_YOR116C_26_0 || 1455446	-1.51											-3.19					2.4						-0.13					-0.01														0.72
YLR301W_ORF	|| || cotranslational protein targeting to membrane || molecular_function || YLR301W || Hypothetical ORF || 1452722	-1.39		-1.28	-1.69	-3.03	-0.34	-0.54	-2.09	-1.5	-0.74	-1.1	-1.08	0.07	-1.05	-0.09	2.06	1.42	-1.4		-1.73	-1.33	-1.35	-1.51	0.22	-1.42	-0.38	-1.89	-1.25	-0.17	-1.08	-2.4	0.06	-0.89	-0.93		-1.48		-0.4	-0.11	-0.69	-0.14	-0.22	-0.68	-1.19	-1.16
YKR043C_ORF	|| || biological_process || molecular_function || YKR043C || Hypothetical ORF || 1456971	-0.86	-1.58	-0.68	0.11	0.24	0.33	-1.36	-0.09	-3.37	-0.02	-0.15	0.18	0.44	-4.11	0.78	3.26	2.86	0.28		-0.1	0.89	-0.27	0.85	0.62	2.21	0.04	0	-0.93	0.12	0.44	0.35	0.51	0.2	1.32	-1.17	0.85		0.76	-0.52	-0.74	-0.42	-0.3	-0.07	0.18	0.07
YKL152C_ORF	|| GPM1 || glycolysis* || phosphoglycerate mutase activity || YKL152C || phosphoglycerate mutase || 1457376	-0.96	-2.06	-2.25	-1.38	-1.9	-0.16	-2.96	-1.78	-0.22	-0.96	-1.23	-0.04	-1.46	-2.16	1.23	1.19	0.97	0.71	-0.47	-0.59	0.18	-1.07	-1.24	1.34	-1.32	-1.31	-0.95	-0.49	-1.14	-0.61	-1.85	-1.09	-1.29	-0.94	-0.57	-0.81	0.16	-1.73	-1.43	-0.52	0.16	-0.48	0.46	-0.24	-0.47
YNR029C_ORF	|| || biological_process || molecular_function || YNR029C || Hypothetical ORF || 1454319	-0.19	0.31	0.89	-1.06	-1.18	-0.66	-0.05	0.1		-1.78	-1.62	-2.33	0.59	-2.51	-0.04	3.57	4.19	-0.77		-0.47	-1.42	-0.56	0.53	-0.71	0.53	-1.61	-0.55	-1.07	-2.19	-1.14	-0.61	-0.4		-0.82		-1.03	-3.89	0.95	0.25	-1.33	-0.59	-0.16	-0.31	-0.24	-0.69
Q0070_INT_2	|| AI5_ALPHA || movement of group I intron || endonuclease activity || Q0070 || YBOX_INT1000069:INT_2_Q0070:NC_001224:16471..18953 || 1451358	1.38	-0.17	-2.58	-0.39	-1.06	0.01	-0.14	0.71	1.2	0.21	0.48	0.81	-0.26	0.09	2.64	2.44	1.67	4.08	2.92	2.45	0.02	1.66	-0.01	2.13	-1.88	-0.92	-0.49	0.62	0.05	-0.41	0.64	-0.24	-0.24	0.86	1.38	1.61	1	-1.46	-1.07	1.07	0.72	0.06	1.92	0.15	1.32
YBR189W_ORF	|| RPS9B || translation* || structural constituent of ribosome || YBR189W || ribosomal protein S9B (S13) (rp21) (YS11) || 1454924	-0.01	-1.61	-2.26	-1.08	-1.16	0.34	-1.45	-0.94	-0.28	0.37	-1.22	0.42	-0.82	-2.06	1.24	2.11	1.39	0.27	0.07	-0.2	0.49	-0.44	-0.24	0.89	2.59	-0.9	-0.7	-0.83	-0.48	0.38	-1.04	-1.24	-0.86	0.87	0.7	0.73	-0.5	0.07	0.02	-0.4	0.17	-0.06	0.67	0.07	0.65
Q0065_INT_1	|| AI4 || RNA splicing* || endonuclease activity || Q0065 || YBOX_INT1000071:INT_1_Q0065:NC_001224:13987..18953 || 1456916	1.02	-0.61	-2.28	-0.97	-1.66	-0.59	-1.43	-1.82	0.92	-0.21	-0.94	-0.77	-1.84	-0.13	2.62	2.37	0.67	4.48	3.06	1.5	-0.67	1.09	-0.35	1.55	-2.63	-1.88	-1.96	-0.86	-0.47	-1.42	0.13	-2.07	-2.48	-0.2	0.55	0.62	0.81	-1.48	-0.63	0.06	-0.55	-0.48	1.56	-0.87	0.62
YMR116C_JXN_IE_1_ORF	|| ASC1 || telomere maintenance* || molecular_function || YMR116C || YBOX_JXN1000079:JXN_IE_1_YMR116C:NC_001145:complement(499838..499917) || 1453438	-1.58	-1.89	-2.06	-0.9	-1.68	1.01	-3.06	-0.58	-0.11	-1.13	-1.21	0.17	0.18	-2.21	1.64	-0.17	1.94	1.12	-1.21	-0.63	0.58	-0.87	-0.93	0.43	-1.17	-0.78	-1.22	-0.58	-0.93	0.25	-1.38	0.17	-1.13	-0.44	-0.18	-0.92	-0.24	-2.87	0.6	-0.55	-0.36	-0.64	-0.41	0.88	-0.38
YDR012W_ORF	|| RPL4B || translation || structural constituent of ribosome || YDR012W || ribosomal protein L4B (L2B) (rp2) (YL2) || 1456580	-0.92	-1.95	-1.91	-0.42	-0.95	-0.22	-2.06	-1.01	-0.38	-0.89	-1.1	-0.02	-1.06	-1.54	2.35	1.33	0.79	0.27	-0.34	0.38	0.57	-0.57	-0.79	1.24	-0.38	-1.36	-0.68	-0.55	-0.04	0.12	-1.19	-0.87	-0.58	0.13	0	-0.14	0.66	-1.88	-1.08	-0.5	-0.1	-0.32	-0.06	0.01	-0.47
YDR368W_ORF	|| YPR1 || arabinose catabolic process* || oxidoreductase activity* || YDR368W || homologous to the aldo-keto reductase protein family || 1457488	-1.57		-0.57	-2.1	-1.69	-0.27	-0.81			-1.36			-1.3				1.22	-1.47		-1	-0.99	-1.24	-0.05	-0.75		-0.99				-0.72		-0.36	-0.85	-0.33	-1.33	-1.76	-0.41	0.83	-2.32	-0.54	-2.16	-0.67	-0.37	-0.74	0.84
YPL081W_ORF	|| RPS9A || translation* || structural constituent of ribosome || YPL081W || ribosomal protein S9A (S13) (rp21) (YS11) || 1451750	-0.13	-1.06	-1.81	-1.02	-1.51	0.12	-1.73	-1.18	0.72	0.03	-0.87	0.7	0.17	-1.34	1.33	1.59	1.55	0.44	-0.14	-0.28	0.06	-0.49	-0.49	0.56	2.53	-1.09	-0.81	0.05	-0.99	-0.05	-0.91	-1.22	-0.45	0.18	1.22	0.43	0.59	-1.83	-1.04	0.2	-0.2	-0.31	0.86	0.33	0.39
YMR125W_ORF	|| STO1 || telomere maintenance* || mRNA binding || YMR125W || Large subunit of the nuclear cap-binding protein complex || 1452257	-1.04	-2.9	-1.56	-3.42	-2.85	-2.52	-1.29	-0.93		-2.42	-1.85	-2.53	-1.44		-0.03	-0.28	1.01	-1.29		-2.63	-1.24	-1.03	-1.89	-0.85	-3.33	-1.85	-2.64	-2.38	-1.97	-2.56	-2.74	-1.14	0.34	-1.62	-7.53	-2.51	-3.8	0.09	-0.46	-1.44	-2.07	-0.99	-1.91	-1.66	-0.67
YLR274W_ORF	|| CDC46 || DNA replication initiation* || chromatin binding* || YLR274W || Component of the hexameric MCM complex, which is important for priming origins of DNA replication in G1 and becomes an active ATP-dependent helicase that promotes DNA melting and elongation when activated by Cdc7p-Dbf4p in S-phase || 1457144	-0.27	-1.07	-2.27	-1.68	-4.52	-1.42	-0.82			-0.92	-0.34	-2.13	0.32		-0.02	0.31	1.58	-0.58		-1.5	-0.34	-0.37	0.11	-0.37	-1.11	-0.56	-1.11	-1.35	-0.33	-0.67	0.63	-0.34	-1.11	-0.68	-2.67	-2.01		0.22	-1.68	-1.02	-1.06	-1.04	-0.49	-0.48	-0.54
YGR086C_ORF	|| PIL1 || endocytosis* || protein kinase inhibitor activity || YGR086C || Phosphorylation Inhibited by Long chain base || 1452242	-2.07	-0.81	-2.71	-1.08	-0.43	-0.38	-2.31	-1.46	-0.75	-0.88	-1.67	-2.33	-1.8	-0.33	-0.06	1.35	2.2	-0.19	-0.99	-1.29	0.5	-1.23	-1.21	0.14	-1.7	-1.8	-1.15	-0.28	-1.3	0.11	-1.73	-1.29	-0.96	-0.75	-1.73	-2.27	0.79	-1.47	-1.42	-0.5	-0.49	-1.25	-0.35	0.08	-0.64
YAR002W_ORF	|| NUP60 || telomere maintenance* || structural constituent of nuclear pore || YAR002W || nuclear pore complex subunit || 1455096	-2.53	-2.47	-0.55	-0.82	-2.87	-1.26	0.38	-1.36		-1.05	-0.46	-2.25	-1.19	0.98	-0.84	0.91	1.92	-1.48		-1.22	-1.1	-0.26	-0.28	-1.02	-1.99	-1.72	-1.29	-0.42	-2.69	-0.94	-1.75	-3.79	-0.66	-1.17		-2.18	-6.04	0.16	-2.37	-1.12	-0.65	-0.02	-0.82	-0.85	-1.28
YCR102C_OCH__ORF	|| || response to copper ion || molecular_function || YCR102C || YBOX_OCH1000028:YCR102C_YCR102C_SGDID:S0000699_Chr_III_305463-304357_RC_Unc_ORF_897_0 || 1457751	-2.55	-3.67	0.47	-2.35	-2.02	-0.58	0.32	-1.84		-1.8	-0.81	-1.6	-2.19	-2.35	-0.15	1.01	0.47	-1.74		-0.83	-0.54	0.75	-1.13	0.14	-1.25	-0.98	-2.43	-1.67	-0.26	-1.54	-2.01	-1.78	-2.8	-2.15	-2.44	-2.19		-3.77	-2.79	-0.68	0.42	0.64	-1.6	-0.97	-1.72
YDR158W_ORF	|| HOM2 || response to drug* || aspartate-semialdehyde dehydrogenase activity || YDR158W || aspartic beta semi-aldehyde dehydrogenase || 1451494	-1.93	-2.06	-2.61	-1.6	-1.92	-0.71	-2.64	-1.66	-2.2	-1.97	-2.18	-1.74	-1.65	-1.79	0.54	0.29	0.47	-0.49	-5.09	-0.97	-0.22	-1.27	-1	0	-2.68	-1.96	-1.7	-1.9	-0.37	-1.38	-1.89	-1.35	-2.47	-0.61	-3.05	-1.18	-0.2	-0.91	-0.42	-1.44	-0.63	-1.12	-1.01	-0.58	-0.85
YOR270C_ORF	|| VPH1 || protein complex assembly* || hydrogen ion transporting ATPase activity, rotational mechanism || YOR270C || V0 sector subunit|essential for vacuolar acidification and vacuolar H-ATPase activity|vacuolar ATPase V0 domain subunit a (100 kDa)|vacuolar H-ATPase || 1456806	-1.29	-3.74	-2.51	-2.01	-2	-1.87	-2.3	0.3		-2.44	-1.88	-2.1	-0.47	-1.33	0.6	0.22	-0.45	-1.45		-1.19	-0.49	-0.98	-1.07	-1	-1.93	-1.06	-1.97	-1.57	-0.25	-1.71	-0.56	-0.96	-1.84	-0.88		-1.53	-2.64	0.2	-0.14	-1.47	-1.69	-0.93	-1.6	-1.63	-1.62
Q0120_INT_2	|| BI4 || Group I intron splicing || RNA binding || Q0120 || YBOX_INT1000077:INT_2_Q0120:NC_001224:37737..39140 || 1451519	-0.39	-2.4	0.32	-1.66	0.29	0.68	-1.05	-0.28	-0.29	-0.65	-2.7	-2.47	-0.19	1	1.1	0.99	2.84	3.07	1.79	0.2	-0.16	0.33	0.53	-0.82	-5.35	-0.09	-2.77	-1.54	-1.85	-0.64	-1.6	-2.53	-2.29	-0.65		-2.23	-2.46	-3.3	0.91	-1.31	-1.05	-1.17	-0.96	0.22	-1.29
YMR116C_JXN_EI_1_ORF	|| ASC1 || telomere maintenance* || molecular_function || YMR116C || YBOX_JXN1000080:JXN_EI_1_YMR116C:NC_001145:complement(500111..500190) || 1456433	-1.49	-1.83	-2.47	-1.25	-1.65	0.14	-2.6	-0.77	-0.3	-1.59	-1.46	-0.54	-0.86	-2.13	1.7	-0.18	0.33	0.34	-1.34	-0.79	-0.39	-1.08	-1.43	0.24	-1.25	-1.4	-0.29	-0.66	-1.02	0.05	-1.37	-0.86	-1.14	-1.01	-0.17	-1.06	-0.25	-2.71	-0.53	-0.82	-0.31	-0.49	-0.38	0.15	-0.69
YBR031W_ORF	|| RPL4A || translation || structural constituent of ribosome || YBR031W || ribosomal protein L4A (L2A) (rp2) (YL2) || 1456425	-1.04	-1.91	-1.81	-0.3	-0.87	-0.14	-1.77	-0.78	-0.74	-0.98	-1.31	-0.14	-1.01	-1.49	2.67	0.85	-0.02	0.39	-0.29	-0.27	0.7	-0.44	-0.42	1.21	-0.35	-0.94	-0.57	-0.64	0.1	0.37	-1.37	-0.81	-0.89	-0.4	-0.95	-0.14	0.77	-1.47	-1.74	-0.38	-0.24	-0.19	0.25	0.03	-0.2
YMR116C_ORF	|| ASC1 || telomere maintenance* || molecular_function || YMR116C || G-beta like protein || 1454640	-1.89	-2.72	-2.2	-1.22	-2.08	-0.21	-2.88	-1.73	-0.45	-1.62	-1.51	-0.72	-1.39	-1.98	1.22	-0.22	-0.02	-0.39	-0.71	-0.8	-0.29	-1.17	-1.26	0.59	-1.29	-1.64	-1.33	-0.98	-0.99	-0.2	-1.88	-1.5	-1.4	-0.49	-1.15	-0.77	-0.09	-0.2	-1.71	-0.91	0.31	-0.47	-0.41	-0.16	-0.57
YEL027W_ORF	|| CUP5 || endocytosis* || hydrogen ion transporter activity || YEL027W || 17 kDa|VO sector subunit|dicyclohexylcarbodiimide binding subunit|proteolipid|vacuolar ATP synthase proteolipid C|vacuolar ATPase V0 domain subunit c (dicyclohexylcarbodiimide binding subunit) (17 kDa) || 1457241	0.06	-1.43	-1.35	-0.14	-1.25	0.73	-1.56	-1.24	0.08	-0.25	-0.86	0.31	-0.67	-1.5	2.35	1.49	0.69	0.39	-0.04	-0.5	0.91	-0.32	-0.08	0.47	-0.53	0.18	-0.45	-0.15	-0.42	-0.21	-1.21	-0.53	-1.01	0.2	0.01	0.26	0.27	-1.17	-0.94	0.02	-1.05	0.08	0.45	0.41	0.06
YMR309C_ORF	|| NIP1 || ribosome biogenesis and assembly* || translation initiation factor activity || YMR309C || translation initiation factor eIF3 subunit || 1455875	-1.7	-2.71	-4.19	-2.24	-2.85	-2.29	-1.85	0.11		-1.35	-1.22	-1.5	-3.1	-2.51	-1.04	0.49	-0.72	-1.39		-2.33	-1	-1.62	-1.54	-1.15	-2.33	-2.83	-2.61	-1.99	-1.19	-2.23	-2.01	-2.95	-2.1	-1.7	-3.16	-2.11			-0.25	-1.81	-1.79	-1.81	-1.8	-1.92	-1.54
YPL081W_OCH__ORF	|| RPS9A || translation* || structural constituent of ribosome || YPL081W || YBOX_OCH1000116:YPL081W_RPS9A_SGDID:S0006002_Chr_XVI_404947-404953,405455-406041_intron_removed_Ver_ORF_226_0 || 1453932	-0.53	-1.61	-0.52	-1.18	-0.89	-0.07	-1.89	-1.29	-2.69	-0.49	-0.76	0.4	-0.28	-1.12	1.07	1.88	1.13	0.27	-0.37	-0.37	0.12	-0.11	-0.17	0.94	2.51	-0.84	-0.72	-0.73	-0.62	-0.06	-0.63	-1.19	-1.42	0.15	-0.43	0.1		-0.84	0.34	-0.04	-0.8	-0.32	0.47	0.14	0.84
YBR189W_OCH__ORF	|| RPS9B || translation* || structural constituent of ribosome || YBR189W || YBOX_OCH1000020:YBR189W_RPS9B_SGDID:S0000393_Chr_II_604503-604509,604923-605503_intron_removed_Ver_ORF_212_0 || 1450481	-0.23	-1.21	-1.29	-0.76	-0.98	0.39	-1.67	-1.15	0.51	0.26	-0.96	0.44	-0.3	-1.71	1.08	1.56	1.58	1.05	0.27	-0.38	0.57	-0.19	-0.53	0.86	2.67	-1.47	-0.65	-0.06	-0.89	1.13	-1.18	-1	-0.17	0.27	0.4	0.35	-0.2	-1.47	-0.92	-0.05	0.01	-0.15	0.47	0.39	0.06
YBR039W_ORF	|| ATP3 || ATP synthesis coupled proton transport || hydrogen ion transporting ATP synthase activity, rotational mechanism || YBR039W || ATP synthase gamma subunit || 1457952	-0.72	-1.24	-1.78	-0.92	-0.68	0.37	0.2	-0.02	-0.01	-0.44	-1.62	0.02	-0.56	-3.87	2.78	0.38	0.51	0.66		-0.69	1.03	-0.48	-0.18	0.8	-1.85	-1.19	-0.99	0.02	-0.37	0.06	-0.85	-0.29	-0.86	1.3	-2.93	-0.17	1.07	-0.49	-0.46	-0.17	-0.33	-0.24	0.24	0.9	0.01
IGR_CHR05:(COMPLEMENT(118454..118607))_19	|| || || || || YBOX_IGR1000036:NEL009C:NEL009C:chr05.fsa:(complement(118454..118607)):154:bp._19_0 || 1450554	-0.88	-2.71		-0.15	-1.67	-1.47	0.33	1.46		-1.02	0.44	-3.5	-0.86	1.17	-0.14		2.01			-0.92	-0.04	0.46	0.14	-4.14	-1.55	1.18	0.89	0.18	0.76	-1.83	-0.59		1.5			-0.86			1.04	-0.52	-1.29	-0.03	-1.09	-1.17
YPR202W_INT_1	|| || biological_process || molecular_function || YPR202W || YBOX_INT1000248:INT_1_YPR202W:NC_001148:943047..943194 || 1453059	-0.05	-3.91	-0.13	0.27	-0.05	-0.28	0.36	0.02		-0.34	0.96		0.87	-0.2	1.04	2.14	1.36	0.26	-0.12	0.09	1.24	1.4	0.89	-0.28	1.78	0.1	-0.69	-0.17	0.85	0.12	0.84	0.29	-0.53	0.5	-0.9	-0.07			0.61	0.05	-0.37	0.34	-0.01	-0.45	-0.89
YGR254W_ORF	|| ENO1 || glycolysis* || phosphopyruvate hydratase activity || YGR254W || enolase I || 1455760	-1.86	-2.72	-1.96	-1.47	-2.02	-0.47	-3.32	-1.72	-1	-1.29	-1.43	-0.28	-0.81	-2.78	1.32	-0.01	-0.48	-0.09	-0.47	-1.17	-0.09	-1.09	-0.57	1.13	-0.8	-2.02	-1.23	-1.06	-1.17	-0.52	-1.33	-0.98	-0.68	0.05	-1.14	-1.35	0.94	-1.51	-1.28	-0.77	-0.72	-0.09	0.96	-0.29	-0.87
YGR145W_ORF	|| ENP2 || ribosome biogenesis and assembly* || molecular_function || YGR145W || Essential protein of unknown function || 1453512	-0.92	-0.05	-2.33	-1.75	-1.91	-0.83	-1.6	-0.75		-0.55	-0.11	-2.89	-1.38	-0.61	-0.87	2.31	1.07	-1.36		-1.42	-0.78	-1.11	-1.22	-0.3	2.02	-0.3	-1.2	-1.36	-1.57	-1.23	-0.82	-2.96	-0.24	-1.08		-1.04		1.01	-0.31	-1.42	-0.93	-1.03	-0.55	-1.28	-0.93
YEL071W_ORF	|| DLD3 || lactate metabolic process || D-lactate dehydrogenase (cytochrome) activity || YEL071W || D-lactate dehydrogenase || 1454865	-1.62	-3.11	-0.65	-1.58	-1.63	-0.27	-1.03	-0.51	-3.82	-0.79	-0.81	-0.99	-0.25	-1.47	0.35	-0.65	1.83	-0.92		-0.76	-0.21	-1.33	-0.19	-0.32	1.61	-0.04	-2.01	-1.12	-0.95	-0.97	-1.3	-1.09	-0.99	-0.5	-2.23	-1.68	-0.28	-0.49	-0.31	-0.76	-1.89	-0.93	-0.75	-0.95	-0.83
YGR060W_ORF	|| ERG25 || ergosterol biosynthetic process || C-4 methylsterol oxidase activity || YGR060W || C-4 sterol methyl oxidase || 1455407	-0.83	-1.66		-1.36	-1.57	-0.49	-2.16	-0.82	-0.91	-0.91	-1.49	-0.26	-1.41	-0.2	1.31	0.52	0.7	-0.52	-0.69	-0.13	0.09	-0.65	-0.54	0.29	-2.6	-1.55	-1.35	-0.49	-0.03	-0.14	-0.65	-1.73	-2	1.08	-0.89	-0.94	-0.51	-0.63	-0.79	-0.17	-1.14	-0.66	-0.14	-0.58	-0.25
YJL130C_ORF	|| URA2 || 'de novo' pyrimidine base biosynthetic process* || carbamoyl-phosphate synthase (glutamine-hydrolyzing) activity* || YJL130C || aspartate transcarbamylase|carbamoyl phosphate synthetase|glutamine amidotransferase || 1455441	-2.37		-3.86	-2.66	-2.07	-2.27	-0.98		-3.41	-1.92	-1.74	-1.75	-1.63	-2.88	-1.37	0.2	-0.49	-1.95	-3.03	-2.34	-1.59	-1.14	-1.63	-1.37	-2.55	-1.89	-1.82	-1.77	-1.17	-1.97	-1.49	-0.76	-2.12	-2.1	-4.97	-1.98		-0.98	-1.13	-1.64	-1.11	-1.11	-1.77	-2.52	-2.48
YNL129W_ORF	|| NRK1 || nicotinamide riboside metabolic process || nicotinamide riboside kinase activity || YNL129W || Hypothetical ORF || 1457066	-1.51	-1.52		-1.25	-1.51	-0.27	0.74	2.54		-2.04	0.01	-1.22		0.31	-0.18	-0.21	2.6	0.18		-1.42	-0.15	-0.08	-0.59	0.6	0.26	-2.54	-0.73	-0.38	0	-0.51	-0.18	-3.75	0.73	0.48	-3.37				1.11	-0.32	0.24	0.34	-0.69	0.23	-0.02	2.45083
YEL076C-A_ORF	|| || biological_process || molecular_function || YEL076C-A || Hypothetical ORF || 1453102	-0.51	-1.33	-0.43	0.07	-0.72	0.18	-1.7	-0.12	-0.52	-0.91	-1.01	-0.29	1.02	-1.07	1.02	1.56	2.18	-0.01	-0.54	-0.09	0.72	0.87	0.97	-0.63	1.61	-1.23	-0.58	-1.33	-0.54	0.03	0.27	-0.42	-0.86	0.15	-1.87	-1.04	-1.89	-0.86	-0.93	-0.73	1.15	-0.25	-0.59	-0.33	-1.57
Q0105_INT_5	|| COB || aerobic respiration* || ubiquinol-cytochrome-c reductase activity || Q0105 || YBOX_INT1000075:INT_5_Q0105:NC_001224:42559..43296 || 1458615	0.35	-1.38	0.99	-0.65	-1.66	0.97	-0.37	0.82	-1.64	-1.09	-1.28	-1.14	-2.43	0.25	1.99	1.14	1.96	3.8	3.1	0.13	0.15	1.21	-0.55	1.04	-4.27	2.08	-1.23	-0.12	-1.87	-1.25	-0.56	-0.81	-1.29	0.93	1.03	-0.21	-0.67	0.58	0.3	0.12	0.3	-0.51	0.47	-0.17	0.31
IGR_CHR07:(548469..549469)_196	|| || || || || YBOX_IGR1000168:gGR07_1:gGR07_1:chr07.fsa:(548469..549469):1001:bp._196_0 || 1450842		-0.82	0.3	0.16	-1.67	-0.38	1.18	1.12		-1.14	0.23			-2.49	1.3	1.5	2.16	-0.44		0.18	0.27	0.72	0.52	-0.61	-0.63	-0.38	-0.33	0.07	0.29	-0.27	-0.5	-0.27	1.05	-0.35		-0.95	-1.62	-1.18	1.07	-4.42	-0.36	0.04	-0.24	-0.38	-0.44
YPR080W_ORF	|| TEF1 || translational elongation* || translation elongation factor activity || YPR080W || translational elongation factor EF-1 alpha || 1454490	-1.5	-2.34	-1.96	-0.89	-1.82	-0.77	-3.49	-1.2	0.42	-0.75	-1.23	-0.83	-1.98	-2.42	1.26	-0.11	0.22	0.14	-0.5	-0.81	0.13	-1.55	-1.2	1.81	-0.58	-1.73	-1.08	-0.83	-1.28	-0.07	-1.59	-1.34	-0.49	-0.27	-0.59	-0.47	1.03	-1.58	-1.97	-1.25	-0.38	-0.32	0.72	-0.38	-1.03
Q0105_INT_4	|| COB || aerobic respiration* || ubiquinol-cytochrome-c reductase activity || Q0105 || YBOX_INT1000074:INT_4_Q0105:NC_001224:41091..42507 || 1450631	-0.57	-0.63	0.3	-1.78	-1.21	-0.02	0.16	-0.45		-0.89	-0.35	-1.58	-0.6	-1.79	1.29	1.16	1.67	2.82	1.86	0.52	-0.26	0.6	-0.71	0.1	-3.42	-0.93	-2.83	-1.17	-0.87	-2.22	-0.69	-0.22	-0.57	0.73	-2.31	-1.27	-1.75	0.41	0.7	-0.94	-0.65	-0.21	-0.35	-0.86	-0.42
YOR187W_TIL_901_1200_182_ORF	|| TUF1 || translational elongation || GTPase activity* || YOR187W || YBOX_TIL1000315:TIL_YOR187W_901_1200_182_0 || 1458559	-0.61	-1.65	-2.06	-1.25	-2.02	-0.07	-1.27	-0.96	-1.52	-0.73	-1.12	-1.16	0.37	-0.99	1.25	-0.39	0.93	-0.57		-0.86	0.6	-0.84	-1.44	0.14	-1.92	-1.06	-1.41	-1.59	-1.13	-0.32	-0.9	-2.07	-0.69	0.59		-1.74	-0.05	-1.6	-0.27	-1.31	-1.07	-0.25	-0.49	-0.39	-0.92
YHR026W_ORF	|| PPA1 || response to drug* || hydrogen ion transporting ATPase activity, rotational mechanism || YHR026W || proteolipid|vacuolar ATPase V0 domain subunit c'' || 1456105	-0.3	-0.47	-0.13	0.05	-0.44	1.26	-0.5	0.33	0.07	0.78	0.82	0.56	-0.78	0.2	2.75	1.75	1.06	0.86	-2	0.25	2.02	0.28	0.82	0.43	1.61	1.36	-0.06	0.04	0.39	0.71	-0.21	0.07	0.66	0.3	-0.14	0.67	-0.35	0.41	0.57	0.59	-0.46	0.25	0.57	0.53	0.53
YDL084W_ORF	|| SUB2 || nuclear mRNA splicing, via spliceosome* || protein binding* || YDL084W || ATP-dependent RNA helicase || 1456030	-1.01	-1.45	-2.12	-0.15	-1.77	-0.7	-1.94	-1.92	-0.81	-0.75	-0.95	-0.86	-0.1	-1.51	2.04	0.11	0.26	-0.06	-1.41	-1.42	-0.42	-0.5	-0.38	0.02	-0.96	-2.1	-1.84	0.33	-1.07	0.14	-1	-1.5	-0.79	0.24	-0.58	-1.4	0.39	-2.12	-1.02	-0.83	-0.52	-0.9	-0.5	0.06	-0.48
YDL055C_ORF	|| PSA1 || protein amino acid glycosylation* || mannose-1-phosphate guanylyltransferase activity || YDL055C || GDP-mannose pyrophosphorylase|mannose-1-phosphate guanyltransferase || 1456313	-1.86	-3	-2.68	1.2	-2.16	-0.14	-2.81	-1.01	-0.44	-1.21	-1.76	-0.74	-1.53	-2.39	1.17	0.6	-0.57	0.12	-0.92	-0.97	0.34	-1.16	-0.13	0.72	-2.09	-0.12	-1.43	-1.22	-0.79	-0.64	-1.52	-1.32	-1.59	-0.75	-0.57	-0.84	0.25	-2.16	-0.87	-1.16	-0.44	-0.81	-0.34	-0.63	-0.71
YPL004C_ORF	|| LSP1 || endocytosis* || protein kinase inhibitor activity || YPL004C || Long chain base Stimulates Phosphorylation || 1457902	-0.89	-1.3	-1.14	0.2	0.16	-0.53	-1.92	-0.54	-1.56	-1.07	-2.31	-1.21	-0.63	-1.3	0.24	1.26	2.99	1		-1.11	-0.06	-1.01	-0.38	0.28	-1.64	-0.68	-1.09	-0.05	-0.84	-0.14	-1.24	-2.31	-0.92	-0.73		-1.91	0.35	-1.14	0.12	-0.97	-1.53	-0.83	-0.46	-0.17	-0.63
YLR083C_ORF	|| EMP70 || biological_process || molecular_function || YLR083C || Protein whose 24kDa cleavage product is found in endosome-enriched membrane fractions, predicted to be a transmembrane protein || 1454164	-1.55			-1.08	-1.61	-1.32	-0.58	0.55		-1.26	-1.33		0.05			1.59	-0.25	-0.76			-0.49	-0.5		-0.89	-0.72	-1.6	0.27	-0.75	-0.55	-0.41	-0.36	0.36	-1.47	-0.7	-3.02	-1.6		0.9	-0.58	0.64	-0.72	-0.44	-1.12	-1.06	-0.18
YLR082C_ORF	|| SRL2 || nucleobase, nucleoside, nucleotide and nucleic acid metabolic process || molecular_function || YLR082C || Suppressor of Rad53 null Lethality || 1455039	-0.67	-0.83	-0.35	-1.06	-0.73	-0.73		2.57		0.55		-2.59		3.21	-0.07		2.78			-0.84	-0.26	0.24	-0.36	-3.45	-0.26	0.66	-0.91	-0.02		-0.44						-1.33		2.04	-2.65	-0.55	0.1	-0.05	-1.6	-1.79
YBR031W_OCH_DS100_ORF	|| RPL4A || translation || structural constituent of ribosome || YBR031W || YBOX_OCH1000127:DS100_YBR031W_YBR031W_Chr02_(301255..301354)_100_bp._1_0 || 1451016	-0.8	-0.67	-1.57	-0.68	-0.84	0.04	-2.47	-0.96	0.28	-0.36	-1.18	-0.3	-1	-2.25	2.44	0.74	0.33	-0.03	-0.17	-0.37	-0.14	-1.19	-0.65	0.53	-0.64	-0.51	-0.73	0.27	-0.62	0.55	-1.33	0.04	-0.77	-0.81	0.17	-0.3	-0.26	-1.07	-0.9	-0.4	-0.33	-0.79	-0.01	-0.32	-0.17
Q0070_ORF	|| AI5_ALPHA || movement of group I intron || endonuclease activity || Q0070 || DNA endonuclease involved in intron homing || 1451498	-1.82	-0.97		-1.35	0.13	-1.22	-1.6	0.8	-0.6	-2.1	-1.28	-1.41	-2.1	-0.72	0.74	0.95	1.54	3.11	1.18	-0.05	-2.17	-0.49	-1.04	-1.4	-5.16	-3.13	-2.13	-0.61	-1.96	-1.58	-1.56	-3.83	-0.07	-1.57	-2.1	-2.17	-1.62	-2.16	-1.66	-1.26	-0.84	-1.59	-1.09	-0.28	-1.83
Q0085_ORF	|| ATP6 || ATP synthesis coupled proton transport || hydrogen ion transporting ATP synthase activity, rotational mechanism || Q0085 || ATP synthase subunit 6 || 1454917	1.13	-1.92	-1.84	0.51	0.13	1.5	-0.92	-0.55	1.34	0.15	-1.04	-0.1	0.22	-1.36	1.77	1.23	2.02	4.16	2.68	1.18	-0.47	0.43	0.36	0.46	-4.43	0.03	-1.55	-0.14	-1.19	-0.66	-0.28	-2.02	-0.7	1.34	1.48	-0.13	-0.01	-2.88	-0.99	-0.52	0.68	-0.61	0.89	1.12	1.42
YBR011C_ORF	|| IPP1 || phosphate metabolic process || inorganic diphosphatase activity || YBR011C || inorganic pyrophosphatase || 1454321	-1.95	-1.9	-2.84	-1.47	-2.6	-0.65	-2.75	-2.75	-0.62	-1.23	-2.46	-1.1	-1.47	-1.99	1.75	-0.87	-1.14	-0.54	-0.89	-1.65	-0.46	-1.7	-1.31	0.4	-2.49	-1.97	-2.06	-1.59	-1.45	-0.99	-2.02	-1.89	-1.6	-0.69	-1.2	-1.95	0.31	-2.53	-2.48	-1.32	-0.61	-0.95	-0.47	-1.62	-0.81
YLR089C_ORF	|| || biological_process || transaminase activity || YLR089C || putative alanine transaminase (glutamyc pyruvic transaminase) || 1457478	-1.8		-0.53	-1.1	-1.56	-0.46	-0.56	-1.2		-1.5	-0.26		0.44	-1.23	0.01	1.41	1.03	-1.33		-1.14	0.62	-0.49	0.25	-0.59	-2.89	0.4	-0.94	-1.05	-0.23	-0.9	-1.44	-1.46	-1.27	-0.97	1.13	-1.83	-1.18	-0.07	-1.72	-1.41	-1.14	0.01	-1.13	-0.57	-1
Q0055_INT_1	|| AI2 || RNA splicing || RNA binding* || Q0055 || YBOX_INT1000073:INT_1_Q0055:NC_001224:13987..16434 || 1452303	1.84	-1.15	-2.12	-0.81	-1.08	0.06	-1.05	-1.1	1.59	0.5	-0.01	0.8	-1.04	-0.27	1.1	2.18	0.92	3.91	2.96	1.96	0.19	0.93	0.13	2.03	-2	-0.91	-0.73	-0.08	0.4	-0.38	1.1	-1.08	-1.23	0.61	1.82	1.51	0.83	-1.04	-0.51	-0.05	-0.04	0.02	2.05	-0.09	1.45
Q0105_ORF	|| COB || aerobic respiration* || ubiquinol-cytochrome-c reductase activity || Q0105 || cytochrome b || 1450119	0.87	0.48	-1.85	-0.81	-1.42	0.68	-1.06	-1.05	1.05	-0.99	-0.72	1.28	-1.47	-0.56	1.96	1.97	0.62	3.44	3.07	1.18	0.28	1.2	0.08	0.89	-3.72	-1.58	-0.74	0.76	-0.41	-1.14	-0.51	-0.78	0.22	1.45	1.26	0.11	-0.58	-1.94	-1.34	0.34	0.77	-0.16	0.7	-0.42	-0.03
YLR342W_ORF	|| FKS1 || cell wall organization and biogenesis* || 1,3-beta-glucan synthase activity || YLR342W || 1,3-beta-D-glucan synthase || 1456071	-2.03	-2.2	-0.67	-2.45	-2.21	-1.1	-1.69	-2.35		-2.69	-1.61	-1.88	-0.87	-1.83	-0.13	0.07	0.44	-1.36	-2.9	-1.69	-0.64	-1.24	-1.59	-1.48	-3.04	-1.75	-1.92	-1.48	-0.32	-1.45	-1.91	-2.51	-1.31	-1.4		-2.77		-3.77	-0.35	-1.25	-2.63	-0.5	-1.88	-1.94	-1.98
YHR064C_ORF	|| SSZ1 || translation* || unfolded protein binding || YHR064C || HSP70 family || 1453459	-1.84	-3.29	-3.32	-1.97	-2.66	-0.76	-2.67	-2.02	-1.09	-1.68	-2.28	-0.97	-1.93	-2.32	0.45	-0.44	-1.77	-1.06		-2.04	-0.7	-1.87	-2.41	-0.11	-1.49	-2.02	-1.61	-1.2	-1	-1.05	-2.31	-1.42	-1.65	-1.2		-1.92	-1.09	-1.8	-2.14	-1.44	-1.63	-1.68	-0.85	-0.74	-1.38
YLR270W_ORF	|| DCS1 || deadenylation-dependent decapping || m7G(5')pppN diphosphatase activity* || YLR270W || Non-essential hydrolase involved in mRNA decapping, may function in a feedback mechanism to regulate deadenylation, contains pyrophosphatase activity andJa HIT (histidine triad)Jmotif; interacts with neutral trehalase Nth1pJJ || 1452075	-0.71			-1.01	-1.33	-0.94	-0.09	0.58		-0.74	-1.6	-2.51		1.73	0.79	0.46	1.77	-1.02		-1.31	-0.38	-0.87	-1.06	0.42	-2.78	-0.08	-1.11	-1.58	-0.94	-0.9	-1.84	-0.68	-2.22	-0.9		-0.49	0.1	0.12	-0.54	-1.14	-0.62	-0.34	-0.59	-1.4	-0.22
YGR282C_ORF	|| BGL2 || cell wall organization and biogenesis || glucan 1,3-beta-glucosidase activity || YGR282C || cell wall endo-beta-1,3-glucanase || 1456413	-0.68	-1.39		-0.05	-0.45	0.59	-1.78	-0.05	-1.5	-0.63	0.17	-0.24	-0.34	-0.2	1.97	1.16	0.99	-0.15	-0.72	-0.19	0.05	-0.64	0.8	0.39	-1.15	0.56	0.85	0.06	0.27	1.04	-1.15	0.24	0.6	1.25	-0.95	-0.84	0.53	0.47	0.38	0.68	-0.03	-0.84	0.13	-0.23	-0.28
YOR116C_TIL_1_300_205_ORF	|| RPO31 || transcription from RNA polymerase III promoter || DNA-directed RNA polymerase activity || YOR116C || YBOX_TIL1000298:TIL_YOR116C_1_300_205_0 || 1455957	-1.56	-2.25	-1.12	0.06	-1.48	-1	-1.75	-0.51		-1.09	-1.07	-1.46	-0.65	-1.68	-0.19	1.34	1.08	-1.63		-0.59	-0.18	0.16	-0.21	-1.64	1.86	-0.99	-1.29	-1.4	-0.69	-1.02	-0.94	-0.66	-1.52	-0.75		-1.57		-1.46	-0.38	-0.73	-0.12	-1.12	-2.03	-2.03	-1.2
YGL103W_INT_1	|| RPL28 || translation || structural constituent of ribosome* || YGL103W || YBOX_INT1000142:INT_1_YGL103W:NC_001139:311019..311529 || 1453689	1.39	-0.59	-0.41	0.97	0.49	1.06	0.48	0.79	0.18	0.21	0.45	0.04	1.5	0.3	1.26	2.47	3.4	0.49	0.74	1.71	0.79	1.46	0.83	0.72	2.59	0.29	0.18	1.17	0.89	1.05	1.02	0.45	-0.26	0.37	1.46	1		0.15	0.61	1.13	-0.33	0.44	1.07	0.34	0.5
YOR230W_ORF	|| WTM1 || protein import into nucleus* || transcription corepressor activity || YOR230W || transcriptional modulator || 1452557	-1.85	-2.7	-1.68	-0.76	-0.59	-0.33	-1.44	-2.23		-1.12	-1.51	-1.51	0	-0.46	0.02	0.51	0.92	-0.14	-1.76	-0.96	0.31	-1.04	-0.79	-0.23	-2.92	-1.06	-0.75	-1.4	-0.46	-0.57	-1.41	-0.39	-0.49	0.02	-4.83	-0.72	0	-0.65	-0.01	-1.56	-1.64	-0.89	-1	-0.02	-0.14
YAL005C_ORF	|| SSA1 || translation* || ATPase activity* || YAL005C || heat shock protein of HSP70 family || 1450609	-2.4	-3.19	-3.42	-2.32	-2.98	-1.8	-4.16	-2.99	-1.28	-2.31	-2.46	-1.45	-1.92	-2.19	-0.37	-0.77	-1.52	-0.54	-2.09	-2.04	-1.02	-1.96	-2	0.12	-1.13	-2.73	-2.43	-2.07	-2.16	-1.22	-2.28	-1.95	-2.41	-1.32	-2.2	-2.52	-0.33	-4.09	-2.78	-2.3	-1.62	-1.76	-0.98	-1.46	-1.96
YHR203C_ORF	|| RPS4B || translation* || structural constituent of ribosome || YHR203C || ribosomal protein S4B (YS6) (rp5) (S7B) || 1457277	-0.47	-1.22	-2.07	-1.47	-1.13	0.11	-2.15	-1.14	0.57	-0.55	-1.21	0.2	-0.73	-2.08	1.65	0.24	0.2	0.33	-0.19	-0.43	0.65	-0.78	-0.59	1.13	-0.4	-1.14	-0.52	-0.66	-0.96	0.62	-1.08	-0.63	-1.21	0.25	0.59	0.21	0.36	-1.66	-0.91	-0.54	0	-0.39	0.61	-0.11	-0.57
YHR174W_OCH__ORF	|| ENO2 || glycolysis* || phosphopyruvate hydratase activity || YHR174W || YBOX_OCH1000063:YHR174W_ENO2_SGDID:S0001217_Chr_VIII_451326-452639_Ver_ORF_184_0 || 1453922	-1.47	-2	-2.31	-1.57	-1.49	-0.06	-2.72	-1.26	1.15	-0.47	-1.26	0.67	-1.51	-2	1.25	-0.03	-0.65	0.33	0.24	-0.37	0.26	-0.81	-0.75	1.42	-0.59	-1.35	-0.65	-0.39	-1.08	0.11	-0.58	-1.1	-1.11	-1.27	-0.63	-1.06	1.01	-2.02	-1.49	-0.07	-0.9	-0.48	0.83	0.47	-0.4
YFR031C-A_ORF	|| RPL2A || translation || structural constituent of ribosome || YFR031C-A || ribosomal protein L2A (L5A) (rp8) (YL6) || 1453864	-0.27	-1.31	-1.65	-0.02	-0.7	1.07	-1.71	-0.92	0.72	0.2	-0.88	0.76	0.2	-1.74	1.34	0.92	1.22	1.41	0.41	0.26	1.4	-0.3	0.51	1.13	0.79	-1.07	-0.28	0.44	-0.56	1.01	-0.46	-0.74	1.39	1.01	1.6	0.51	0.3	-0.65	0.03	0	0.27	-0.01	0.79	1.16	0.03
YHR082C_ORF	|| KSP1 || protein amino acid phosphorylation || protein serine/threonine kinase activity || YHR082C || Serine/threonine kinase similar to casein kinase II and other serine/threonine protein kinases || 1457345	-1.5	-2.18	-1.76	-2.28	-2.31	-1.12	-0.39	-0.46		-2.61	-1.89	-1.72	-0.18	0.41	-0.25	0.6	-0.54	-0.48		-1.83	-0.33	-0.54	-0.65	-0.86	-3.16	-2.98	-1.64	-1.53	-1.5	-1.93	-0.4	-1.63	-2.05	-1.77		-1.28	-5.68	-1.5	-2.24	-0.8	-1.37	-1	-1.39	-1.08	-1.37
YLR441C_OCH__ORF	|| RPS1A || translation || structural constituent of ribosome || YLR441C || YBOX_OCH1000093:YLR441C_RPS1A_SGDID:S0004433_Chr_XII_1018904-1018137_RC_Ver_ORF_217_0 || 1450276	-0.98	-2.24	-2.13	-1.71	-1.3	0.64	-2.74	-1.18	0.36	-0.46	-0.37	0.06	-0.63	-2.32	0.53	0.82	-0.54	-0.47	-0.28	-0.18	-0.79	-1.01	-1.18	0.66	1.64	-1.34	-1.61	0.13	-1.3	0.36	-1.55	-1.51	-2.1	-0.27	-0.55	-0.78	0.38	-2.27	-1.46	-0.52	-0.3	-0.52	0.14	-0.22	-0.56		1.51533
YPL036W_ORF	|| PMA2 || regulation of pH* || hydrogen-exporting ATPase activity, phosphorylative mechanism || YPL036W || plasma membrane ATPase || 1454984	-1.49	-3.52	-1.97	-1.52	-0.35	-0.17	-0.6	0.24	-2.24	0.23	-0.52			-0.74	0.47	-0.14	0.17	-0.95		-0.67	-0.41	-0.23	-0.78	-0.27	0.31	-1.99	0.1	0.18	-0.57	0.11	-0.72	-1.61	-2.11	-0.78	-0.59	-1.16	-2.08	-1.72	0.54	-0.61	-0.21	-0.33	-0.81	-0.53	-1.17
YHR202W_ORF	|| || biological_process || molecular_function || YHR202W || Hypothetical ORF || 1458123	-0.09	-0.9	-2.16	-1.21	-0.65	0.88	-0.47	-0.51	-0.11	-0.15	-0.39	-0.83	-0.32	-0.82	1.22	0.61	0.97	0.88	-0.68	0.23	0.24	-0.27	-0.62	0.71	-0.56	-0.13	-0.09	-0.22	-0.69	0.94	-0.9	-0.77	-1.08	-0.32	0.47	-0.16		-1.01	-0.71	0.04	-0.2	-0.31	0.52	0.62	0.17
YBL111C_INT_1	|| || biological_process || molecular_function || YBL111C || YBOX_INT1000249:INT_1_YBL111C:NC_001134:complement(4117..4215) || 1457954	-0.5	-0.88	-0.05	0.25	-0.39	-0.04	-0.81	-0.42	-2.58	-0.95	-0.69	0.15	0.2	-1.47	1.12	1.95	1.79	-0.09	-0.37	-0.16	1.53	1.07	0.94	-0.65	1.82	-0.92	-0.83	-0.78	-0.09	-0.06	0.12	-0.73	-0.67	0.88	-1	-0.85	-6.56	-0.18	-0.16	-0.62	0.65	-0.11	-0.45	-0.32	-1.1
YAL023C_ORF	|| PMT2 || protein amino acid O-linked glycosylation || dolichyl-phosphate-mannose-protein mannosyltransferase activity || YAL023C || dolichyl phosphate-D-mannose:protein O-D-mannosyltransferase || 1454489	-1.07	-1.52	0.54	-1.55	-1.59	-0.96	0	-0.3	-5.87	-1.84	-0.83	-0.7	0.28	-0.75	1.45	0.09	1.14	-0.74		-0.74	0.27	-0.37	-0.68	-1	-1.56	-0.42	-1.05	-1.18	0.08	-0.36	-0.47	-0.84	-0.41	-0.6		-1.31	-1.67	0.13	-0.48	-1.44	-1.39	0.12	-1.14	-0.95	-0.89
YKL103C_ORF	|| LAP4 || vacuolar protein catabolic process || aminopeptidase I activity || YKL103C || vacuolar aminopeptidase ysc1 || 1455524	-0.92	-1.33		-0.44	-2.96	-0.44	1.42	3.23		0.62	-0.92	-1.44		1.1	-0.07	-0.6	2.21			-0.46		-0.72	-0.83	-0.35	-2.58	-0.34	-1.85	-0.78	-0.68	-0.67	-0.23	-0.23	0.99			-2.02	0.18		1.36	-0.94	0.31	0.47	-1.05	-0.28	0.1	2.81583
YBR196C_ORF	|| PGI1 || glycolysis* || glucose-6-phosphate isomerase activity || YBR196C || glucose-6-phosphate isomerase || 1454340	-1.85	-2.73	-3.09	-1.31	-2.49	-1.3	-2.79	-2.03	-1.47	-2.04	-2.5	-1.03	-1.32	-2.35	0.35	-0.51	-0.99	-1.43	-1.92	-1.87	-0.78	-1.79	-1.28	-0.17	-3.13	-1.52	-2.15	-1.67	-1.65	-1.3	-2.29	-1.95	-2.21	-1.54	-1.88	-1.91	-0.49	-1.72	-1.91	-2.04	-1.9	-1.35	-0.88	-1.29	-1.6
YNL209W_ORF	|| SSB2 || translation* || ATPase activity* || YNL209W || SSB1 homolog|heat shock protein of HSP70 family || 1450967	-1.89	-3.01	-2.92	-1.21	-2.13	-0.83	-2.54	-2.37	-0.97	-1.41	-1.64	-1.07	-2.03	-3.31	0.82	-0.93	-0.88	-0.8	-1.03	-1.43	-0.5	-1.22	-1.37	-0.18	-1.14	-1.99	-1.72	-1.27	-2.06	-0.97	-1.16	-2.04	-1.38	-1.01	-1.38	-1.5	-0.41	-2.29	-2.5	-1.82	-1.13	-1.47	-0.62	-1.22	-1.38
YPL240C_ORF	|| HSP82 || response to stress* || unfolded protein binding* || YPL240C || heat shock protein 90|mammalian Hsp90 homolog || 1457655	-2.48	-2.06	-2.56	-3.22	-3.01	-0.97		-3.01	-1.81	-2.47	-1.56	-2.35	-2.25	-3.33	-0.65	-1.01	-0.65	-1.88	-1.45	-1.52	-1.2		-2.58	-0.58	-0.77	-1.77	-2.08	-2.54	-2.81	-2.48	-2.23	-2.07	-2.16	-1.62	-2.85	-2.48	-0.16	-2.72	-3.05	-1.24			-1.29	-1.76	-1.72
YKR006C_ORF	|| MRPL13 || translation || structural constituent of ribosome || YKR006C || Mitochondrial ribosomal protein of the large subunit, not essential for mitochondrial translation || 1450124	-1.54	-1.05	-0.75	-0.55	-1.05	0.55	-0.54	-0.77		-0.5	-0.12		-1.04	-0.73	0.42	-0.04	2.34	0.2		-0.36	0.05	-0.23	0.67	0.15	0.64	-0.23	-0.53	0.88	0.9	0.43	0.07	0.83		0.54	-0.65	-0.62	-1.7	0.47	-0.58	0.15	-0.5	-0.32	0.29	1.03	0.44
YMR108W_ORF	|| ILV2 || branched chain family amino acid biosynthetic process || acetolactate synthase activity* || YMR108W || acetolactate synthase || 1456121	-1.29		-4.35	-1.87	-2.01	-1.5	-0.5	-1.86	-4.39	-1.9	-0.65		-1.62		-0.12	-0.14	-1.2	-0.72		-2.2	0.07	-0.72	-2.54	-0.63	-0.01	-1.79	-1.41	-1.36	-1.68	-1.09	-1.7	-0.49	-2.13	-0.72	-3.76	-1.17		-2.77	-0.47	-2.04	-0.83	-0.94	-1.06	-0.75	-1.04
YIL177C_ORF	|| || biological_process || helicase activity || YIL177C || Hypothetical ORF || 1451937	-1.21	-1.14	-2.51	-0.82	-2.05	-0.62	-1.59	-1.08	-1.85	-1.81	-0.5	-1.6	-0.59	-0.48	-0.08	0.87	0.25	-1.16	-0.63	-1.1	0.04	-0.21	-0.77	-1.38	1.2	-0.45	-1.94	-1.25	-0.36	-0.66	-1.36	-1.67	-1.22	-0.81	-1.99	-1.26	-1.86	-1.32	0.14	-0.69	2.49	0.48	-1.22	-1.25	-1.1
YLR340W_ORF	|| RPP0 || translational elongation* || structural constituent of ribosome || YLR340W || ribosomal protein P0 (A0) (L10E) || 1457804	-1.07	-2.16	-1.61	-0.97	-0.98	-0.13	-2.36	-1.06	-1.26	-1.15	-1.19	0.42	-1.46	-1.81	1.31	0.46	-0.19	0.48	-0.79	-0.19	0.46	-0.36	-0.4	0.81	0.64	-1.62	-0.79	-0.23	-0.12	-0.04	-1.3	-1.06	-1.15	0.85	-1.04	-0.42	0.42	-2.19	-0.55	-0.1	-0.16	-0.49	0.14	0.02	0.06
YLR244C_ORF	|| MAP1 || proteolysis || methionyl aminopeptidase activity || YLR244C || methionine aminopeptidase || 1458293	-1.09	-3.56	-1.7	-1.74	-1.17	-1.12	-0.78	-0.82		-0.98	-1.17		-0.24	-0.61	0.7	0.53	-1.15	-0.77		-1.42	0.08	-0.72	-1.03	0.25	-1.47	-0.79	-1.06	-1.48	-1.01	-0.67	-1.52	-1.26	-1.92	-0.5	-2.75	-1.16	-0.84	-0.08	-1.61	-0.95	-0.75	-1.22	-0.41	-0.8	-1.41
YOR074C_JXN_IE_1_ORF	|| CDC21 || DNA-dependent DNA replication* || thymidylate synthase activity || YOR074C || YBOX_JXN1000008:JXN_IE_1_YOR074C:NC_001147:complement(467316..467395) || 1456711	-1.29	-2.03	-1.64	-0.74	-1.36	-0.45	-0.21	-0.85		-0.42	-0.46	-2.79	1.02		1.22	0.23	-0.06	-0.61		-0.96	-0.31	-0.28	0.71	0.67	0.56	0.74	-0.93	-0.74	-0.81	-0.42	-0.81	-0.78	-0.44	-0.21		-0.13	-0.29	1.14	1.05	-0.88	-0.53	0.23	0.12	-0.34	-0.23
YLR464W_INT_1	|| || biological_process || molecular_function || YLR464W || YBOX_INT1000253:INT_1_YLR464W:NC_001144:1067082..1067360 || 1455677	-0.35	-2.07		-0.33	0	-0.24	-1.41	-0.83	-1.94	-0.98	-0.47	-0.23	-0.07	-0.69	0.9	1.03	1.63	0.15	-0.7	-0.3	0.71	1.22	0.6	-0.94	1.1	-0.78	-0.7	-0.77	-0.69	-0.15	-0.13	-0.95	-0.79	-0.23		-1.5	-1.68	-2.25	-0.79	-0.73	1.34	0.26	-0.44	-0.45	-0.96
YGR254W_OCH__ORF	|| ENO1 || glycolysis* || phosphopyruvate hydratase activity || YGR254W || YBOX_OCH1000057:YGR254W_ENO1_SGDID:S0003486_Chr_VII_1000932-1002245_Ver_ORF_182_0 || 1453674	-1.48	-2.14	-2.21	-0.95	-1.13	-0.34	-1.47	-0.83	-0.88	-0.72	-1.16	-0.1	-0.42	-2.28	1.49	-0.49	-0.13	0.06	-0.93	0.07	-0.25	-1.04	-1.02	-0.2	-0.7	-1.79	-0.56	0.74	-1.03	0.55	-0.75	-1.17	-0.88	-0.96	-0.88	-1.22	0.78	-2.03	-1.01	-0.72	-1.6	-0.91	0.04	-0.1	-0.34
YAL005C_OCH__ORF	|| SSA1 || translation* || ATPase activity* || YAL005C || YBOX_OCH1000197:YAL005C_SSA1_SGDID:S0000004_Chr_I_141433-139505_RC_Ver_ORF_1234_0 || 1457815	-1.81	-3.02	-2.6	-2.4	-2.56	-1.37	-3.73	-2.98	-2.52	-2.02	-1.81	-2.02	-2.64	-3	0.12	-0.87	-1.07	-1.15	-2.08	-2.05	-0.41	-1.91	-1.97	-1.21	-1.5	-2.54	-2.44	-2.15	-1.74	-1.8	-2.16	-0.93	-2.54	-1.36	-3.18	-2.65	-0.53	-2.82	-3.04	-1.81	-1.92	-1.75	-1.37	-1.53	-1.52
YHR117W_ORF	|| TOM71 || biological_process || protein transporter activity || YHR117W || protein translocase 71 kDa component of the outer membrane of mitochondria || 1454485	-0.25	-1.38	-2.96	-1.09	-3.38	-0.88	0.68	0.26		-1.28	-1.25	-1.94	-0.12	0.2	0.27	-0.15	0.04	-0.92		-0.43	-0.59	-0.47	-0.39	-0.64	-1.4	-2.72	-1.4	-0.39	-1.79	-0.72	-1.76	-1.77	-0.3	-1.15		-1.36	-0.99	0.05	-1.34	-1.19	-0.93	0.41	-0.83	-0.42	-0.99
YML012W_ORF	|| ERV25 || ER to Golgi vesicle-mediated transport || molecular_function || YML012W || vesicle coat component || 1451679	-0.39	-0.27	-1.19	-0.64	-0.77	1.26	-0.63	-0.82	-0.2	0.42	-0.54	-0.46	0.12	-1.07	2.19	1.39	0.05	0.23	0.36	0.04	0.64	-0.47	0.84	0.78	2.77	-0.66	0.16	-0.53	-0.15	0.19	0.35	0.08	-1.26	0.69	-0.68	0.11	-0.24	0.47	-0.33	0.44	-0.36	-0.15	0.19	1.08	0.29
YGR266W_ORF	|| || biological_process || molecular_function || YGR266W || probably contains a single transmembrane span || 1450748	-1.82	-1.68	-2.02	-1.2	-1.68	-0.76	-3.07	-1.98	-1.74	-1.53	-1.67	-0.72	-0.95	-2	1.43	-0.49	-0.4	-0.23	-0.36	-0.96	0.02	-0.94	-0.66	0.7	-0.99	-1.87	-1.36	-0.85	-0.87	-0.72	-1.54	-1.25	-1.5	-0.32	-1.49	-1.11	0.7	-2.71	-1.43	0.02	-1.21	-0.75	0.03	-0.47	-0.65
YNL231C_ORF	|| PDR16 || response to drug* || phosphatidylinositol transporter activity || YNL231C || Pdr17p homolog|Sec14p homolog || 1456884	-0.69	-3.76	-3.12	-1.15	-1.42	-0.16	-0.23	0.13		-1.26	-0.13	-1.57		-0.47	0.3	-0.73	-0.08	-0.54		-0.48	-0.21	-0.29	-0.79	-0.09	0.11	-1.65	-1.02	-0.53	-0.92	-0.1	-1.29	-1.64	-1.06	-0.45		-0.95	-0.16	-1.6	-1.33	-1.34	-0.54	-0.44	-0.56	-0.03	-0.67	1.94133
YGR192C_OCH_DS100_ORF	|| TDH3 || glycolysis* || glyceraldehyde-3-phosphate dehydrogenase (phosphorylating) activity || YGR192C || YBOX_OCH1000149:DS100_YGR192C_YGR192C_Chr07_(complement(882717..882816))_100_bp._26_0 || 1450947	-1.4	-2.46	-2.44	-1.45	-1.77	-0.88	-2.28	-1.95	1.47	-0.61	-0.7	-1.56	-1.76	-3.15	0.43	0.01	-0.6	0.75	0.08	-1.35	-0.69	-1.33	-1.98	2.13	-1.78	-1.47	-1.56	-1.82	-2.35	-0.39	-0.83	-1.69	-1.49	0.14	0.08	-1.53	0.79	-2.29	-2.04	-1.79	-0.13	-1.53	1.64	-0.36	-0.77		1.95733
YOR063W_ORF	|| RPL3 || translation* || structural constituent of ribosome || YOR063W || ribosomal protein L3 (rp1) (YL1) || 1456767	-1.2	-1.81	-2.05	-0.49	-0.53	-0.6	-2.87	-0.39	-0.8	0.26	-0.78	0.31	-0.55	-1.4	1.31	0.42	0.17	-0.28	-0.11	-0.24	0.11	-1.08	-0.54	0.32	0.63	-0.79	-0.77	-0.04	0.24	0.55	-1.51	-0.48	-0.83	0.42	-0.22	-0.42	0.43	-0.54	-0.22	0.26	-0.89	-0.78	-0.03	-0.77	-0.34
YML126C_ORF	|| ERG13 || ergosterol biosynthetic process || hydroxymethylglutaryl-CoA synthase activity || YML126C || 3-hydroxy-3-methylglutaryl coenzyme A synthase || 1458129	-1.43	-0.54	-1.53	-1.43	-1.78	-1.24	-2.15	-1.37	-1.96	-1.74	-1.43	-1.22	-1.32	0.49	1.45	0.27	-0.2	-0.79		-1.24	-0.11	-0.85	-0.88	0.07	-2.34	-1.9	-1.79	-0.69	-0.59	-0.73	-1.85	-1.53	-2.22	0.58	-1.71	-0.95	0.08	-0.94	-0.97	-0.45	-1.48	-1.05	-0.53	-0.73	-1.13
YLR216C_ORF	|| CPR6 || protein folding || unfolded protein binding* || YLR216C || cyclophilin 40|peptidyl-prolyl cis-trans isomerase (PPIase) || 1457667	-1.05			-1.49	-1.64	-0.44	-2.51	-0.68		-0.49	-0.53	-0.87	-0.7	-1.58	0.46	0.14	0.76	-0.46		-1.48	-0.67	-1.52	-1.27	0.21	-0.59	-1.87	-0.74	-1.06	-1.37	-0.77	-2.05	-0.49	-0.69	-0.38	-2.47	-1.35	0.42	-0.11	-1.96	-0.98	-0.69	-0.83	-0.33	-0.41	-1.17
YER080W_ORF	|| || biological_process || molecular_function || YER080W || The authentic, non-tagged protein was localized to the mitochondria || 1454369	-1.65	-0.94		-2.1	-3.13	-1.12	-0.67	-0.36		-1.95	-0.15	-0.8	-1.65	-1.9	-0.68	-0.95	1.3	-1.48		-1.6	-0.97	-1.29	0.28	-0.06	-1.42	-0.9	-1.43	-2.28	-1.65	-1.22	-1.51	-0.85	-0.59	-0.68	-2.26	-1.65	-3.43	-1.13	-1.54	-1.12	-1.31	-0.61	-0.71	-0.92	0.64
YDR012W_OCH_DS100_ORF	|| RPL4B || translation || structural constituent of ribosome || YDR012W || YBOX_OCH1000134:DS100_YDR012W_YDR012W_Chr04_(472939..473038)_100_bp._5_0 || 1451306	-1.32	-2.48	-1.63	-0.67	-0.75	0.03	-1.66	-1.5	-1.11	-0.69	-1.1	-1.56		-1.23	1.39	0.01	0.01	0	-0.5	-1.28	0.36	-0.94	-0.72	0.63	-0.95	-0.91	-1.25	-0.6	-1.41	-0.49	-1.45	-2.63	-0.75	-0.66	-0.79	-0.58	-0.28	0.28	0.34	-1.37	-0.41	-0.94	-0.07	-0.73	-0.29
Q0045_JXN_EE20_5_ORF	|| COX1 || aerobic respiration* || cytochrome-c oxidase activity || Q0045 || YBOX_JXN1000120:JXN_EE20_5_Q0045:NC_001224:join(22212..22246,23612..23646) || 1456858	-0.82	-0.63	-0.87	-0.28	-0.78	2.01	-1.5	-1.55	-0.34	-0.95	-2.68	0.4	-1.23	-0.02	1.3	1.84	0.35	4.07	2.53	1.11	0.87	0.09	-0.98	0.58	-4.32	-0.94	-1.78	-0.69	-2.48	-1.18	-0.94	-0.24	-1.17	-0.02	-3.48	-1.5	-2.01	-1.82	-1.16	0.65	-1.22	-0.57	-0.67	-0.6	-0.99
YLR027C_ORF	|| AAT2 || nitrogen compound metabolic process* || aspartate transaminase activity || YLR027C || aspartate aminotransferase || 1452915	-1.97	-2.01	-2.5	-1.17	-1.86	-0.24	-1.45	-1.32	-2.41	-0.91	-0.48	-1.15	-0.73	-3.02	0.63	-0.7	-0.13	0.36		-0.89	0.28	-0.96	-0.56	0.55	-2.33	-1.61	-1.22	-0.4	-0.71	-0.12	-1.74	-1.07	-0.35	-0.55	-1.8	-1.44	0.47	-0.38	-0.82	-1.28	-1.15	-0.3	-0.3	-0.27	-1.2
YOL106W_ORF	|| || || || YOL106W || Hypothetical ORF || 1450568	0.53	-1.44	-2.34	-0.84	-1.16	-0.31		-1.81		-1.77	-0.56	0.96	-0.26	-0.66	0.07	0.83	1.45	-1.34		-1.22	-0.13		0.13		-0.63	-1.03	-1.35	-0.59	-0.65	-0.29	-0.81	-1.68	-0.53	0.51		0.07		-1.54	0.67	-0.51		-0.38		-0.96	0.27
YML133C_ORF	|| || biological_process || helicase activity || YML133C || Hypothetical ORF || 1457539	-0.99	-0.71	-3.14	-1.39	-0.98	-1.12	-0.86	-0.41		-1.14	-1.33	-0.91	-0.54	-1.66	0.23	0.18	0.75	-1.51	-3.13	-1.39	-0.01	0.21	-0.01	-1.79	1.53	-0.43	-2.08	-1.99	-1.1	-0.95	-1.05	-2.33	-1.5	-0.9	-2.44	-1.5		0.2	-1.32	-0.9	2.25	0.52	-1.28	-1.01	-1.35
YGL009C_ORF	|| LEU1 || leucine biosynthetic process || 3-isopropylmalate dehydratase activity || YGL009C || isopropylmalate isomerase || 1456553	-1.33	-2.08	-3.56	-2.14	-2.44	-1.85	-2.31	-0.28	-4.92	-0.55	-1.96	-1.67	-1.6	-1.3	-0.97	-0.96	0.48	-0.94	-4.41	-1.08	0.03	-1.6	-1.39	-1.14	-2.79	-0.8	-1.69	-1.95	-2.2	-1.68	-4.97	-0.33	-1.56	-1.63	-2.17	-2.19		0.25	-0.06		-1.35	-1.74	-1.72	-1.36	0.34
IGR_CHR11:(14591..15208)_131	|| || || || || YBOX_IGR1000194:gKL01_5:gKL01_5:chr11.fsa:(14591..15208):618:bp._131_0 || 1455546	-0.33			-0.27	-0.68	-0.43	0.47	0.62		-0.75	-0.63	-1.58		3.21	1.34	0.92	1.92	-0.5		0.43	0.76	0.43	0.9	0.55	-0.37	0.17	-0.77	-0.07	1.02	0.04	0.85	1.48	-0.31	0.24		0.19	-1.79	1	0.23	0.16	-1.16	-0.26		-0.34	0.23
YLR029C_ORF	|| RPL15A || translation || structural constituent of ribosome* || YLR029C || ribosomal protein L15A (YL10) (rp15R) (L13A) || 1451167	-0.99	-1.68	-1.63	-0.83	-0.9	0.58	-2.47	-0.87	0.64	-0.24	-1.04	0.83	-0.29	-1.18	1.35	-0.25	0.74	1.64	0.05	-0.25	0.01	-0.64	-0.53	0.21	1.59	-1.38	-0.81	-0.44	-0.11	0.17	-1.2	-0.54	-1.17	-0.49	-0.1	-0.53	-0.25	-1.35	-0.29	0.89	-0.05	-0.4	0.15	0.95	-0.16
YGR240C_ORF	|| PFK1 || glycolysis || 6-phosphofructokinase activity || YGR240C || phosphofructokinase alpha subunit || 1453935	-2.21	-1.76	-3.31	-2.6	-3.31	-1.26	-3.42	-1.44	-2.41	-1.54	-1.88	-0.83	-1.98	-3.23	-0.88	-0.14	-1.45	-1.62	-1.81	-1.49	-1.01	-1.95	-1.3	-1.2	-2.7	-1.63	-1.52	-1.68	-1.02	-0.34	-2.42	-1.94	-2.09	-1.56	-5.86	-2.15	-2.43	-1.97	-1.45	-1.6	-1.6	-1.64	-1.53	-1.75	-1.89
YKL157W_JXN_IE_1_ORF	|| APE2 || peptide metabolic process || leucyl aminopeptidase activity || YKL157W || YBOX_JXN1000065:JXN_IE_1_YKL157W:NC_001143:155620..155699 || 1454620	-1.43	-2.3	-1.58	-2.27	-2.35	-1.41	-1.84		-2.34	-0.85	-0.78	-1.88	-1.59	-1.01	-0.1	0.15	-0.57	-0.37		-2.04	-0.6	-0.78	-0.12	-0.41	-3.14	-1.06	-1.85	-0.83	-2.08	-1.42	-2.33	-1.68	-1.72	-2.88		-1.61	-0.95	-0.55	-1.04	-1.18	-2.29	-1.06	-2.01	-1.47	-1.05
YJR065C_ORF	|| ARP3 || actin filament organization* || structural constituent of cytoskeleton* || YJR065C || actin-related gene || 1455740	-1.03	-1.28	-1.04	-1.12	-0.87	-0.5	-1.09	1.03	-1.09	-0.95	-0.84	-1.74	-0.39	-1.3	1.8	0.17	0.26	-0.57		-1.29	-0.25	-1.21	-0.55	-0.01	-2.71	-0.94	-0.77	-1.07	-0.61	-1.17	-1.25	-1.68	0.77	-1.05		-1.34		0.36	-0.42	-1.34	-0.54	-0.99	-0.94	0.09	-1.18
YBR118W_ORF	|| TEF2 || translational elongation* || translation elongation factor activity || YBR118W || translational elongation factor EF-1 alpha || 1452751	-0.42	-1.78	-2.68	-1.51	-1.84	-0.59	-3.35	-1.75	-0.78	-0.67	-1.33	-0.66	-1.76	-2.22	1.43	-0.14	-0.83	-0.09	-0.07	-0.84	0.33	-0.84	-1.08	2.08	-0.84	-1.44	-1.17	-0.17	-0.77	-0.55	-1.14	-1.31	-1.23	-1.07	-0.48	-1.07	1.36	-1.56	-1.94	-1.18	-1.32	-1.28	0.99	0.21	-1.07
YKL153W_ORF	|| || || || YKL153W || Protein required for cell viability || 1456490	-0.68	-0.71	-0.45	0.15	-0.18	0.67	0.55	0.03		0.07	0.69	1.34	0.1	1.38	1.62	1.72	0.93	0.27		0.19	0.53	-0.06	-0.83	0.41	-0.69	0.38	0.16	-0.01	-0.3	0.15	0.01	-0.07	-0.84	0.08	-4.7	-0.19	-0.9	1.01	0.8	0.26	-0.01	0.15		0.3	0.44
YJR009C_ORF	|| TDH2 || glycolysis* || glyceraldehyde-3-phosphate dehydrogenase (phosphorylating) activity || YJR009C || glyceraldehyde 3-phosphate dehydrogenase || 1454513	-1.18	-2.54	-1.58	-1.39	-1.73	-0.54	-2.69	-1.84	0.28	-1.08	-1.56	-0.35	-1.67	-2.99	0.96	-0.33	-0.3	-0.07	-0.62	-0.81	-0.26	-0.84	-1.38	0.89	-1.76	-1.64	-1.33	-1.15	-1.17	-0.76	-1.14	-1.26	-1.4	-0.63	-0.5	-1.08	0.53	-1.57	-2	-1.23	-0.02	-0.56	0.28	-0.28	-0.85
YIL018W_ORF	|| RPL2B || translation* || structural constituent of ribosome || YIL018W || ribosomal protein L2B (L5B) (rp8) (YL6) || 1457324	0.04	-1.46	-1.65	-0.22	-0.63	1.34	-2.04	-0.47	0.45	0.51	-1.01	0.44	-0.75	-1.44	1.07	1.82	0.13	1.03	0.39	-0.08	1.44	-0.57	-0.06	1.44	0.48	-0.72	0.04	-0.44	-0.53	0.52	-0.52	-0.37	0.16	1.02	1.44	1.02	0.47	-1.29	-0.42	0.41	0.04	0.19	-0.05	0.6	0.63
YLR355C_ORF	|| ILV5 || mitochondrial genome maintenance* || ketol-acid reductoisomerase activity || YLR355C || acetohydroxyacid reductoisomerase || 1450187	-1.31	-1.49	-2.08	-1.41	-1.77	-0.35	-2.87	-1.51	-0.44	-1.45	-1.08	-0.39	-1.29	-2.06	0.69	0.09	-0.27	-0.59	-0.31	-0.97	-0.26	-1.14	-0.74	0.52	-0.05	-2.06	-1.35	-0.29	-0.77	0.91	-1.85	-1.05	-1.54	-0.53	-1.02	-1.44	0.62	-1.01	-1.16	-0.88	-0.48	-0.95	-0.2	-1.26	-1.01
YAL042W_ORF	|| ERV46 || ER to Golgi vesicle-mediated transport || molecular_function || YAL042W || ER-Golgi transport vesicle protein || 1457453	-0.71	-2.05	-0.09	0.14	-0.38	0.6	-0.83	-0.48	-1.66	0.16	-0.64	-0.29	-0.49	0.3	1.28	1.01	1.17	0		0.49	1.45	0.26	0.62	0.19	2.1	-0.46	-0.48	0.1	0.75	1.05	-0.26	-0.21	-0.73	0.77	-0.27	0.05		1.24	0.73	-0.15	-0.74	0.06	0.16	0.08	0.23
YLR464W_ORF	|| || biological_process || molecular_function || YLR464W || Hypothetical ORF || 1452401	-0.86	-0.78	-1.16	-0.1	0.33	-0.88	-2.02	-0.6	-0.96	-1.33	-0.93	-0.57	-0.1	-0.38	0.67	1.02	2.08	-0.4	-0.72	-0.65	0.44	0.85	0.3	-0.98	1.28	-1.17	-1.15	-1.09	-1.05	-1.08	-0.4	-1.1	-0.5	-0.18	-2.87	-1.52	-1.38	-1.4	-1.76	-0.87	1.08	-0.26	-0.5	-0.41	-1.53
YJR145C_ORF	|| RPS4A || translation* || structural constituent of ribosome || YJR145C || ribosomal protein S4A (YS6) (rp5) (S7A) || 1458250	-0.16	-1.66	-1.71	-1.16	-0.94	0.14	-2.21	-1.33	-0.89	-0.8	-1.91	0.13	-0.96	-1.97	1.61	0.35	-0.04	0.28	-0.25	-0.71	0.69	-0.62	-0.48	1.18	-0.4	-0.77	-1.01	-0.74	-0.73	-0.46	-1.2	-1.18	-1.26	0.98	-0.36	0.5	0.07	-0.51	-1.13	-0.59	-0.02	-0.72	0.53	0.17	-0.04
YER043C_ORF	|| SAH1 || methionine metabolic process* || adenosylhomocysteinase activity || YER043C || S-adenosyl-L-homocysteine hydrolase (putative) || 1456137	-1.9	-2.34	-2.29	-0.8	-2.17	-1.19	-2.24	-1.75	-1.09	-1.62	-1.43	-1.37	-0.64	-2.91	0.58	-1.07	0.08	-0.14	-3.68	-1.5	-0.64	-1.08	-1.16	-0.04	-1.7	-1.66	-1.78	-1.61	-1.77	-1.21	-1.73	-1.63	-1.27	-1.45	-2.29	-1.71	-0.33	-2.35	-1.84	-1.49	-1.13	-1.25	-0.87	-1.01	-1
YFR031C-A_OCH_DS100_ORF	|| RPL2A || translation || structural constituent of ribosome || YFR031C-A || YBOX_OCH1000144:DS100_YFR031C-A_YFR031C-A_Chr06_(complement(220395..220494))_100_bp._1_0 || 1455035	-0.74	-1.89	-2.15	-0.82	-1.1	0.65	-1.66	-1.58	-0.48	-0.58	-1.66	-0.33	-1.27	-2.02	1.62	0.28	-0.64	0.85	-0.88	-0.77	1.27	-0.42	-0.36	0.97	0.04	-1.02	-0.85	-0.99	-1.34	-0.32	-0.81	-1.2	-1.5	0.36	-0.03	0.74	0.15	-0.34	-1.51	-0.83	0.33	-0.16	0.51	0.69	0.18
YLR441C_ORF	|| RPS1A || translation || structural constituent of ribosome || YLR441C || ribosomal protein S1A (rp10A) || 1452956	-0.34	-1.58	-2.1	-1.44	-1.74	0.49	-2.9	-1.5	0.41	-0.64	-1.33	0.8	-0.74	-0.83	1.1	-0.58	0.42	0.22	-0.17	-0.93	-0.08	-0.86	-0.98	0.37	1.64	-1.65	-1.16	-0.47	-1.11	-0.71	-1.57	-1.15	-1.5	0.01	0.3	-0.67	-0.07	-1.39	-1.21	-0.24	0.28	-0.81	0.38	0.62	-0.22
YNL178W_ORF	|| RPS3 || translation* || structural constituent of ribosome || YNL178W || ribosomal protein S3 (rp13) (YS3) || 1450305	-1.11	-2.07	-2.34	-0.98	-1.65	-0.17	-2.62	-2.01	-0.02	-1.22	-1.17	-0.2	-0.97	-2.2	1.62	-0.73	-0.53	0.19	-1.16	-1.19	-0.19	-1.23	-1.5	-0.11	0.91	-1.75	-1.16	-0.75	-1.31	-0.64	-1.53	-1.53	-0.83	0.16	-0.2	-0.55	0.05	-1.91	-0.65	-0.47	0.6	-0.29	0.09	-0.43	-0.29
YKL033W-A_ORF	|| || biological_process || molecular_function || YKL033W-A || Similar to S. pombe hypothetical proteins || 1453551	-0.41	-0.8	-1.19	-0.84	-1.04	0.77	-0.74	0.5	-1.66	0.55	-0.16	-0.24	-1.25	-0.18	0.43	-0.01	2.26	0.25		0.62	0.59	0.02	0.79	0.38	1.63	0.21	-0.79	0.44	0.6	0.31	0.63	-1.03	-1.11	0.33	0.55	0.32	-1.22	1.27	1.26	0.39	-0.12	0.11	0.45	-0.05	0.42
YGR296W_ORF	|| YRF1-3 || telomere maintenance via recombination || DNA helicase activity || YGR296W || Y'-helicase protein 1 || 1458203	-0.96	-1.91	-1.54	-0.81	-1.85	-0.8	-0.03	-1.18	-3.87	-2.01	-1.37	-0.49	-1.02	-1.37	0.09	0.58	0.33	-0.95	-1.37	-1.46	0.05	0.01	-0.23	-1.03	1.14	-1.35	-1.47	-1.36	-1.31	-0.93	-1.39	-2.35	-2.54	-0.86		-1.39	-2.01	-0.51	-2.04	-0.88	2.24	0.49	-1.29	-0.92	-1.37
YOR116C_TIL_1501_1800_229_ORF	|| RPO31 || transcription from RNA polymerase III promoter || DNA-directed RNA polymerase activity || YOR116C || YBOX_TIL1000296:TIL_YOR116C_1501_1800_229_0 || 1453953	-1.54	-0.75	-1.33	-1.65	-2.5	-2.3	-3.07	-1.54		-2.26	-1.17	-3.01	-0.99	0.11	-0.73	-0.09	1.39	-0.69		-2.01	-0.29	-0.51	-0.12	-2.08	0.79	-2.59	-1.9	-0.29	-1.37	-1.62	-1.61		-2.44	-1.77		-2.86		-1.61	-1.09	-1.43	0	-1.53	-2.29	-1.3	-2.13
YDR385W_ORF	|| EFT2 || translational elongation || translation elongation factor activity || YDR385W || translation elongation factor 2 (EF-2) || 1453619	-2.17	-3.36	-2.94	-1.35	-1.16	-2.21	-3.43	-2.38	-0.84	-2.42	-1.65	-1.41	-2.03	-3.05	-0.41	0.15	-1.1	-0.38	-1.16	-1.56	-0.95	-1.53	-1.61	-0.74	-2.86	-1.7	-1.81	-1.94	-1.23	-1.6	-1.61	-1.51	-1.9	-1.23	-1.62	-1.74	-0.92	-2.44	-2.69	0.86	4.96	0.78	-1.42	-1.43	-1.8
YAL038W_ORF	|| CDC19 || glycolysis* || pyruvate kinase activity || YAL038W || pyruvate kinase || 1455415	-1.25	-2.62	-3.17	-2.11	-1.83	-1.29	-3.53	-2.16	-0.97	-1.71	-1.88	-0.34	-2.04	-2.91	0.49	-1.04	-0.82	-1.12	-0.87	-1.19	-0.29	-1.78	-1.9	0.73	-3.12	-2.32	-1.52	-1.33	-1.53	-1.15	-2.28	-1.7	-1.98	-1.28	-1.38	-1.67	0.16	-1.54	-2.08	-1.89	-0.92	-1.15	0.24	-0.99	-1.18
YJL052W_ORF	|| TDH1 || glycolysis* || glyceraldehyde-3-phosphate dehydrogenase (phosphorylating) activity || YJL052W || glyceraldehyde-3-phosphate dehydrogenase 1 || 1451173	-1.46	-3.07	-2.54	-1.67	-1.65	-0.64	-2.69	-2.13	-0.28	-1.15	-1.57	-0.79	-2.05	-3.15	0.52	-0.71	-0.83	-0.53	-0.55	-1.06	-0.64	-1.17	-1.44	0.03	-2.13	-1.63	-1.46	-1.51	-1.46	-1.02	-1.48	-1.58	-1.3	-0.87	-0.86	-1.26	0.16	-1.63	-2.23	-1.65	0.28	-0.89	-0.26	-0.76	-1.07
YLR214W_ORF	|| FRE1 || copper ion import* || ferric-chelate reductase activity || YLR214W || cupric reductase|ferric reductase || 1450817	-0.9	-2.1	-1.64	-1.81	-1.64	-0.46	-1.72	-1.42	-1.66	-0.78	-1.79	-0.59	-0.82	-1.13	0.95	0.09	-0.69	-0.73	-0.58	-1	0.21	-0.47	-0.2	-0.6	-0.38	-1.66	-0.33	-0.63	0.95	-0.71	-0.94	-1.76	-1.71	-1.07		-1.14	-1.6	-1.17	-0.23	-1.24	-1.48	-0.88	-0.68	-1.27	-0.72
YGL008C_ORF	|| PMA1 || regulation of pH* || hydrogen-exporting ATPase activity, phosphorylative mechanism || YGL008C || plasma membrane H+-ATPase || 1457427	-1.4	-2.01	-2.23	-1.25	-1.11	-1.14	-3.63	-2.16	-2.47	-1.19	-1.64	-1.09	-1.18	-0.55	0.16	0.84	-0.6	-1.48	-0.83	-0.93	-0.02	-1.57	-1.07	-1.08	-0.58	-1.56	-1.56	-1.32	-0.78	-0.88	-1.46	-1.06	-1.66	0.06	-2.44	-1.61	-2.29	-1.14	-0.65	-1.1	-1.76	-1.44	-2.39	-1.27	-1.54
YLR087C_TIL_7501_7800_219_ORF	|| CSF1 || fermentation || molecular_function || YLR087C || YBOX_TIL1000288:TIL_YLR087C_7501_7800_219_0 || 1452579	-1.55	-3.62	-2.35	-1.3	-2.29	-1.56	0.22	-1.67		-2.67	-1.5	-1.38	-1.7	-2.26	-0.09	-0.28	-1.1	-2.32		-2.21	-0.65	-0.48	-0.72		0.66	-3.34	-3.46	-3.09	-2.06	-1.31	-2.63	-1.85	-2.71	-1.04		-1.3		-1.24	-2.43	-1.32	2.69	0.61	-4.05	-2.06	-1.53
YMR116C_JXN_EE20_1_ORF	|| ASC1 || telomere maintenance* || molecular_function || YMR116C || YBOX_JXN1000109:JXN_EE20_1_YMR116C:NC_001145:complement(join(499843..499877,500151..500185)) || 1456367	-1.05	-1.89	-1.66	-0.83	-1.11	-0.34	-2.39	0.11	-0.61	-0.81	-1.15	-0.58	-0.17	-1.36	1.4	-0.28	0.15	-0.25	-1.6	-0.77	0.27	-1.12	-1.19	-0.01	-1.23	-1.18	-1.04	-0.26	-0.8	0.94	-0.55	0.25	0.18	-0.5	-0.15	-0.71	-0.17	-2.01	-0.36	-0.49	-0.73	-0.53	-0.21	0.25	-0.89
IGR_CHR07:(549469..550469)_437	|| || || || || YBOX_IGR1000169:gGR07_2:gGR07_2:chr07.fsa:(549469..550469):1001:bp._437_0 || 1452858	-0.29	-1.8	-2.24	-1.23	0.04	-1.86	1.21	-1.3		-1.08	-1.25		-1.83	-1.35	0.58	0.3	1	-1.06		-1.16	-0.09	0.69	-0.1	-1.91	-1.72	-1.38	-1.6	-1.13	-0.81	-0.98	-1.01	-2.12	-1.98	-1.02		-0.96		-1.04	-1.54	-0.97	0.18	0.37	-0.82	-1.54	-1.73
YOR341W_ORF	|| RPA190 || transcription from RNA polymerase I promoter || DNA-directed RNA polymerase activity || YOR341W || RNA polymerase I subunit || 1453045	-2.28	-1.97	-1.73	-2.43	-1.41	-2.01	-2.13	-0.55		-2.19	-0.53	-2.12	-1.41	-2.47	-0.96	-0.76	1	-1.51	-4.61	-2.31	-0.93	-1.51	-1.46	-1.36	-0.19	-2.02	-2.51	-1.9	-1.38	-1.95	-1.15	-2.42	-2.1	-1.48		-1.97		-0.81	0.46	-1.65	-0.01	-1.45	-2.47	-2.25	-1.72
YDR353W_ORF	|| TRR1 || response to oxidative stress* || thioredoxin-disulfide reductase activity || YDR353W || thioredoxin reductase|EC 1.6.4.5 || 1456548	-1.35	-1.54	-2.19	-0.73	-1.27	-0.3	-1.89	-0.59	-1.53	-1.22	-1.64	-1.61	-0.27	-1.59	0.96	-0.35		0.2	-1.52	-1.04	0.85	-0.62	-0.63	0.67	-1.18	-1.73	-1.17	-1.08	-0.78	-0.54	-1.23	-1.2	-1.19	0.76	-1.86	-0.54	0.96	-0.48	-0.77	-0.83	-0.43	-0.51	-0.06	-0.04	-0.7
YKL181W_ORF	|| PRS1 || histidine biosynthetic process* || ribose phosphate diphosphokinase activity || YKL181W || ribose-phosphate pyrophosphokinase || 1457102	-0.46	-1.45	-0.74	-1.06	-0.6	0.13	-1.31	-0.23	-1.48	-0.28	-0.43	0.11	-0.22	-1.25	0.71	0.19	1.65	0.24	-1.86	0.48	0.46	0.19	0.71	0.47	1.48	-0.18	-0.69	0.47	-0.07	1.05	-0.65	-0.59	-0.81	0.32	0.08	-0.04	-0.57	-0.25	0.24	-0.01	-0.73	-0.46	0.17	0.44	-0.38
YLL024C_ORF	|| SSA2 || response to stress* || ATPase activity* || YLL024C || HSP70 family || 1453705	-2.52	-3	-3.22	-2.38	-3.04	-1.63	-3.8	-2.99	-1.24	-2.41	-2.88	-1.22	-1.99	-3.46	-0.55	-1.04	-1.79	-1.77	-1.31	-2	-1.13	-2.37	-1.83	0.08	-1.7	-1.93	-2.73	-1.59	-0.07	-1.46	-2.67	-1.59	-2.54	-1.65	-2.17	-2.56	-0.55	-2.4	-2.76	-2.11	-1.77	-1.85	-1.16	-1.87	-1.81
YDL229W_OCH_DS100_ORF	|| SSB1 || translation* || ATPase activity* || YDL229W || YBOX_OCH1000132:DS100_YDL229W_YDL229W_Chr04_(45908..46007)_100_bp._4_0 || 1456989	-1.64	-3.09	-0.88	-1.25	-1.35	-0.74	-3.04	-2.18	-1.49	-0.86	-1.66	-0.91	-5.07	-3.2	0.83	0.16	-0.8	-0.82	-0.52	-1.64	-0.61	-1.64	-1.48	-0.38	-1.16	-1.51	-1.48	-0.77	-2.45	-1.17	-1.2	-1.59	-1.74	-1.31	-1.31	-1.65		-1.88	-2.52	-1.73	-1.24	-1.66	-0.48	-0.68	-0.27
YAR009C_ORF	|| || || || YAR009C || TyB Gag-Pol protein; proteolytically processed to make the Gag, RT, PR, and IN proteins that are required for retrotransposition || 1457546	-2.29	-2.97	-3.04	-2.38	-2.98	-1.54	-3.21	-2.18	-0.67	-2.91	-2.3	-1.56	-2.04	-2.72	-2.1	-0.11	-0.87	-0.9	-2.55	-2.34	-1.62	-1.96	-2.19	-2.13	-2.85	-2.73	-3.34	-2.66	-2.03	-2.49	-1.23	-2.32	-3.27	-1.43	-2.34	-2.55	-1.59	-2.27	-3.17	-2.49	-1.44	-1.31	-1.89	-2.27	-2.25
YDL124W_ORF	|| || metabolic process || aldo-keto reductase activity* || YDL124W || Hypothetical ORF || 1454331	-0.58	-1.07	-1.89	-0.82	-1.31	-0.24	1.33	0.03	-0.97	-0.7	-0.66	-0.81	-0.86	-0.12	0.63	-0.08	1.16	-0.85	-1.62	-0.82	0.53	-0.68	-0.45	0.28	-1.26	0.21	-1.26	-0.32	-0.76	0.07	-1.55	-1.24	-0.63	0.65	-0.3	-1.03	0.6	-0.07	-0.32	-0.71	-0.07	0.1	0.02	-0.62	-0.26
YFL018C_ORF	|| LPD1 || glycine catabolic process* || glycine dehydrogenase (decarboxylating) activity* || YFL018C || dihydrolipoamide dehydrogenase precursor (mature protein is the E3 component of alpha-ketoacid dehydrogenase complexes) || 1452576	-1.68	-1.9		-2.18	-1.62	-1.25	-1.23	-0.35		-2.28	-1.59	-2.17	-0.62	-2.45	0.1	-0.39		-0.88	-2.21	-1.33	-0.26	-1.05	-1.15	-0.12	-1.94	-2.09	-1.48	-1.27	-1.24	-2.06	-1.31	-1.37	-0.85	-0.85		-0.34	0.16	0.68	-0.37	-1.26	-1.36	-0.55	-1.22	-0.81	-0.41
YLR462W_ORF	|| || biological_process || molecular_function || YLR462W || Hypothetical ORF || 1454178	-0.33	-0.9	0.11	0.38	-0.25	-0.14	-2.41	-0.58	-1.39	-0.56	-0.59	-0.18	-0.13	0.07	1.09	2.29	1.12	-0.04	0.62	0.59	1.28	1.18	0.44	-0.16	1.5	-0.99	-0.65	-0.17	0.47	0.17	0.43	-0.68	-0.51	0.28	-1.12	-0.6	-1.44	-0.3	-1.41	-0.05	0.77	-0.15		-0.7	-0.79
YHR192W_ORF	|| || biological_process || molecular_function || YHR192W || Hypothetical ORF || 1458693	-0.25	-0.56	-1.48	-0.47	-0.64	0.17	-1.05	-0.59	-0.53	-0.04	0.2	-0.41	-0.45	0.76	1.15	1.33	0.56	0.87	-0.14	-0.27	0.12	-0.73	0.46	0.99	0.91	-0.59	0.45	0.59	-0.33	0.35	-0.39	-0.48	-1	1.01	-0.06	-0.16	-4.92	-0.7	-0.26	0.7	0.02	-0.17	0.75	0.16	0.22
YBR283C_ORF	|| SSH1 || telomere maintenance* || protein transporter activity || YBR283C || SEC61 homolog involved in co-translational pathway of protein transport || 1456255	-0.52	-0.56	-0.85	-0.46	-0.52	-0.48	0.65		-3.21	-0.58	-1.05	-1.45	-1.85	-2.1	1.53	1.05	0.67	-0.02	-1.46	0.2	1.58	-0.17	0.32	0.34	-1.66	-1.09	-0.3	-0.87	0.94	0.16	-0.74		1.69	0.16	-2.45	-0.47	-0.54	0.78	0.26	-0.21	-0.57	0.09		-0.34	-0.51
YDR531W_ORF	|| || coenzyme A biosynthetic process || pantothenate kinase activity || YDR531W || Pantothenate kinase (ATP:D-pantothenate 4'-phosphotransferase, EC 2.7.1.33) catalyzes the first committed step in the universal biosynthetic pathway leading to CoA. || 1456826	-2.7		-0.56	-1.73	-1.68	-0.38	-2.74	0.28		-0.32	-0.3	-2.04	-2.12	-0.54	0.31	-0.99	0.67	-0.08		-1.48	-0.05	-0.24	-0.45	0.03	-0.79	-1.57	-1.34	-0.53	-1.02	-0.74		-0.83		-0.68	-0.85	-1.45		0.68	0.24	-1.53	-0.55	-0.48	-0.45	-0.1	-0.48
YLL067C_ORF	|| || biological_process || helicase activity || YLL067C || Hypothetical ORF || 1455288	-1.56	-1.77	-0.44	-0.78	-1.17	-0.47	-2.69	-1.7	-1.81	-1.77	-1.63	-0.43	0.25	-0.87	0.05	0.46	1.05	-1.18	-0.48	-1.47	0.55	0.19	-0.09	-1.26	1.21	-1.62	-1.42	-1.39	-1.18	-0.54	-1.25	-1.18	-0.85	-0.58	-1.86	-1.08	-1.7	-1.16	-2.59	-0.7	2.53	0.02	-1.05	-0.79	-0.9
YPL160W_ORF	|| CDC60 || leucyl-tRNA aminoacylation || leucine-tRNA ligase activity || YPL160W || leucine--tRNA ligase || 1455144	-2.18	-3.37	-2.78	-2.95	-2.9	-2.25	-2.88	-1.2	-5.14	-2.1	-2.66	-1.66	-2.21	-2.01	-1.44	-1.12	-0.96	-1.46	-1.98	-2.28	-1.25	-1.76	-2.09	-0.77	-1.41	-1.18	-2.4	-2.52	-2.05	-3.23	-1.87	-1.94	-3.76	-1.47	-5.51	-2.27		0.21	-2.64	-1.76	-2.17	-1.66	-2.2	-1.82	-1.41
YBR127C_ORF	|| VMA2 || vacuolar acidification* || hydrogen ion transporting ATPase activity, rotational mechanism || YBR127C || vacuolar ATPase V1 domain subunit B (60 kDa) || 1450387	-1.73	-1.57	-2.63	-1.19	-2.3	-1.2	-1.23	-2.69	-0.37	-0.9	-1.21	-1.08	0.12	-1.04	0.44	-0.54	-0.57	-0.56	-0.45	-1.03	-0.29	-0.99	-1.36	0.31	-0.52	-0.78	-1.58	-1.12	-1.04	-1.42	-1.79	-1.23	-0.79	-1.08	-0.91	-0.99	0.63	-2.11	-3.16	-1.24	-0.67	-0.92	-0.22	-0.51	-0.33
YCR018C-A_ORF	|| || || || YCR018C-A || Similar to probable membrane protein YLR334C and ORF YOL106W || 1456787	-0.8	-2.26	-1.66	-1.24	-1.19	-0.63	-0.21	-0.51		-0.82	-0.73	1.2	-0.04	-1.11	-0.81	1.4	0.09	-1.54		-1.3	-0.22	-0.02	-1.34	-1.37	-0.53	-1.38	-1.94	-1.02	0.72	-0.84	-0.32	-1.27	-1	0.29	-1.75	-1.43		-0.77	-0.03	0.34	0.1	-0.46	-1.03	-1.44	0.4
YDR342C_OCH__ORF	|| HXT7 || hexose transport || glucose transporter activity* || YDR342C || YBOX_OCH1000242:YDR342C_HXT7_SGDID:S0002750_Chr_IV_1155920-1154208_RC_Ver_ORF_1630 || 1450131	-1.5	-1.67	-2.58	-1.83	-2.21	-0.75	1.1	-1.39	-2.23	-1.3	-1.36	-0.76	-2.01	-0.27	1.02	-0.47	-1.46	-1.25	-0.88	-1.36	-0.94	-1.2	-0.88	-0.29	-3.2	-0.96	-1.84	-1.41	-0.2	-0.98	-1.59	-1.98	-2.59	-1.87		-2.25	-0.67	-1.57	-0.5	-0.57	-0.2	0.48	-0.42	-0.82	-0.38
YEL075C_ORF	|| || biological_process || molecular_function || YEL075C || Hypothetical ORF || 1451375	-0.45	-0.38	-0.51	-0.02	-0.18	0.75		-0.61	-1.34	-0.04	0.15	0.22	-0.82	0.21	1	1.59	1.44	-0.27	0.47	0.32	1.2	1.13	0.91	-0.22	2.06	0.34	-0.61	-0.27	0.01	0.03	-0.05	-0.24	-0.16	0.33	-0.52	-0.54	-1.54	1.24	0.35	0.49	0.84	-0.06	-0.08	-0.24	-0.84
Q0255_OCH__ORF	|| || biological_process || molecular_function || Q0255 || YBOX_OCH1000008:Q0255_Q0255_SGDID:S0007282_Chr_Mito_74495-75622,75663-75872,75904-75984_intron_removed_Unc_ORF_691_0 || 1454839	-0.55	-0.5	0.58	-0.73	-0.77	0.96	0.64	1.13		0.15	0.21	-1.55	0.58	-2.64	1.28	1.54	0.95	0.82	1.89	-0.32	-0.04	0.74	-1.3	-0.01	-4.04	-1.01	-0.35	-0.1	-1.42	-1.21	1.42		-1.41	0.26	-3.37	-0.92	-1.32	0.62	-0.18	-0.95	0.6	-0.28	0.81	-0.52	0.37
YHR219W_ORF	|| || biological_process || molecular_function || YHR219W || Hypothetical ORF || 1457336	-1.09	-2.43	-2.05	-1.05	-0.86	-0.6	-0.91	-1.86		-2.07	-1.34	-1.69	-0.57	-1.22	0.12	0.54	-0.22	-1.11	-1.08	-1.26	0.1	0.04	-0.16	-1.35	1.15	-0.31	-1.64	-1.9	-1.44	-1.01	-0.76	-1.08	-0.76	-0.79	-3.69	-1.29	-2.11	-1.25	-0.69	-0.47	1.91	0.39	1.17	-1.21	-1.23
YDL229W_ORF	|| SSB1 || translation* || ATPase activity* || YDL229W || HSP70 family || 1454540	-1.68	-2.31	-3.37	-1.39	-1.43	-0.95	-2.41	-2.29	-1.5	-1.11	-1.37	-1.06	-1.57	-3.01	0.68	-0.86	-1.02	-0.63	-0.42	-1.57	-0.22	-1.43	-1.09	0.2	-0.86	-1.73	-1.99	-1.93	-1.73	-1.13	-1.34	-1.61	-1.46	-0.97	-1.24	-1.3	-0.55	-2.04	-2.58	-1.78	-0.83	-1.57	-0.66	-1.12	-1.31
YBR221C_ORF	|| PDB1 || pyruvate metabolic process || pyruvate dehydrogenase (acetyl-transferring) activity || YBR221C || pyruvate dehydrogenase beta subunit (E1 beta) || 1451682	-0.84	-1.21	-0.98	-1.7	-1.81	0.05	-0.39	-0.09	-2.07	-0.18	-0.31	-1.5	-2.25	-1.84	0.99	-0.69	0.67	0.37	-1.95	-1.4	0.2	-1.1	-0.06	0.57	-0.76	-1.69	-1.22	-1.31	-0.93	-0.98	-1.79	-0.53	-1.69	0.2	-0.41	-0.74	-0.63	-1.91	-1.01	-0.53	-0.25	-0.34	-0.29	-0.31	-0.83
YJL138C_ORF	|| TIF2 || translational initiation* || translation initiation factor activity* || YJL138C || translation initiation factor eIF4A subunit || 1457006	-1.94	-2.58	-2.34	-2.03	-2.29	-1.06	-2.71	-1.71	-1.53	-0.76	-2.05	-1.1	-1.93	-2.52	0.13	-0.77	-1.18	-0.71	-0.69	-1.94	-0.26	-1.46	-1.27	0.4	-1.33	-2.31	-1.91	-1.46	-1.32	-1	-2.86	-1.79	-2.35	-0.93	-1.21	-1.75	0.88	-2.42	-1.78	-0.92	-1.16	-1.35	-0.37	-1.12	-0.96
YGR253C_ORF	|| PUP2 || sporulation (sensu Fungi)* || endopeptidase activity || YGR253C || proteasome subunit || 1456663	-1.48	-2.08	-2.08	-0.72	-1.49	-0.06	-2.94	-1.09		-0.55	-1.26	-0.09	-1.08	-1.24	1	0.24	-1.07	-0.13	-0.85	-0.72	-0.02	-0.99	-0.61	0.6	0.38	-1.64	-1.31	-0.8	-0.63	-0.41	-1.46	-1.07	-1.02	-1.43	-1.04	-0.97	0.6	-1.3	-0.49	-0.73	-0.76	-0.63	0.17	-0.29	-0.54
YHL049C_ORF	|| || biological_process || molecular_function || YHL049C || Hypothetical ORF || 1453711	-0.45	-0.34	-0.06	0.07	0.19	-0.19	-2.08	0.06	-0.17	-1.13	-0.26	-0.79	-0.03	0.34	0.73	1.82	1.97	-0.6	0.46	0.07	1.12	0.99	0.42	-0.5	1.69	-0.22	-0.83	-0.64	0.07	0.08	-0.01	-0.21	-0.9	0.03	-0.75	-1.23	-1.92	-0.99	-0.61	0.18	1.11	-0.03	-0.26	-0.7	-0.71
YEL076C_ORF	|| || biological_process || molecular_function || YEL076C || Hypothetical ORF || 1450482	-0.4	-0.36	0.54	0.26	-0.29	-0.4	-0.83	-0.6	-1.21	-0.58	-0.54	-0.79	0.23	1.06	1.03	1.63	2.05	0.18	0.08	0.25	1.41	1.24	0.96	-0.77	1.38	-1.09	-0.93	-0.32	-0.39	-0.03	0.21	-0.34	0.42	0.11		-0.8	-2.07	-0.41	-0.78	-0.15	1.37	0.41	-0.36	0.37	-1.54
YHR068W_ORF	|| DYS1 || hypusine biosynthetic process from peptidyl-lysine || transferase activity, transferring alkyl or aryl (other than methyl) groups || YHR068W || deoxyhypusine synthase || 1458535	-1.78	-2.86	-1.71	-1.46	-0.81	0.97	-1.8	-1.51	-1.33	-1.25	-1.19	-0.44	-0.57	-1.5	0.97	-0.43	-0.86	0.18		-1.72	0.66	-1.47	-0.02	0.25	1	-2.24	-1.16	-1.1	-0.3	0.02	-0.52	-1.57	-1.86	-0.48		-1.54		-1.39	-0.49	-0.89	-0.59	-0.58	-0.74	0.52	-0.7
YLR259C_ORF	|| HSP60 || protein folding* || single-stranded DNA binding || YLR259C || chaperonin|groEL homolog || 1450640	-1.17	-1.65	-3.15	-0.6	-1.96	-0.57	-2.35	-1.92	-1.58	-1.4	-2.42	-0.77	-0.45	-2.45	0.42	-0.3	-0.39	-0.69	-1.62	-1.51	-0.22	-1.69	-0.68	-0.41	-0.13	-1.04	-1.86	-2.27	-1.76	-1.25	-1.44	-1.29	-1.36	-0.95		-1.56	-0.13	-1.92	-2.69	-2.29	-1.75	-1.14	-1.09	-0.33	-1.31
YGR180C_ORF	|| RNR4 || DNA replication* || ribonucleoside-diphosphate reductase activity || YGR180C || ribonucleotide reductase, small (R2) subunit || 1453534	-1.93	-1.81	-2.97	-2.1	-3.03	-1.22	-2.44	-2.42	-0.47	-1.46	-2.24	-1.47	-0.23	-2.57	0.52	-1.33	-1.45	-0.78	-5.42	-1.94	-0.85	-1.32	-1.24	0.41	-2.89	-1.99	-1.95	-1.96	-1.6	-1.11	-2.32	-1.5	-2.14	-1.56		-1.85	0.25	-1.95	-2.18	-1.84	-0.91	-1.06	-0.63	-0.69	-1.21
YGR214W_OCH_DS100_ORF	|| RPS0A || translation* || structural constituent of ribosome || YGR214W || YBOX_OCH1000150:DS100_YGR214W_YGR214W_Chr07_(921794..921893)_100_bp._21_0 || 1452454	-0.99	-2.26	-2.74	-2.27	-2.42	-0.35	-1.98	-1.81	-0.73	-1.06	-1.82	-0.66	-0.91	-1.78	0.53	-1.69	-0.41	-0.06	-2	-1.34	-0.08	-0.97	-1.17	0.01	-0.24	-1.4	-1.75	-1.67	-2.15	-0.96	-1.46	-2.04	-1.61	-0.56	-0.25	-1.11	-1.76	-2.45	-1.84	-1.47	-0.01	-0.84	-0.47	-0.35	-0.67
YLR370C_ORF	|| ARC18 || actin filament organization* || structural constituent of cytoskeleton || YLR370C || Arp2/3 complex subunit || 1456693	-0.31	-1.35	-1.46	-1.15	-0.75	-0.24	-0.4	-0.04	-3.05	-0.86	-1.04	-0.13	0.67	-1.08	0.74	0.25	0.82	0.81	-1.72	-0.92	0.43	-0.29	-0.88	0.93	-2.32	0.08	-1.04	-0.39	-0.89	-0.64	-0.69	-1.44	-0.24	0.51	-0.18	-0.23	0.07	1.13	0.63	-0.23	-0.28	-0.31	0.41	0	0.01
YGL001C_ORF	|| ERG26 || ergosterol biosynthetic process || C-3 sterol dehydrogenase (C-4 sterol decarboxylase) activity || YGL001C || C-3 sterol dehydrogenase || 1454974	-0.85	-2.36	-0.86	-0.98	-1.87	-0.59	0.45	-0.34		-0.73	-0.19	-2.19			0.45	-0.61	0.83	0.04		-0.9	-0.7	-0.11	0.11	0.12	-0.97	0.76	-1.28	-0.52	-0.39	-0.3	-0.6	0.44	1.62	-0.46	-2.32	-1.07				-0.72	-0.28	-0.23	-0.62	0.12	-0.92
YLR075W_ORF	|| RPL10 || translation* || structural constituent of ribosome || YLR075W || ribosomal protein L10 || 1455630	-0.5	-1.36	-1.85	-0.73	-0.43	0.22	-1.99	-1.47	0.57	-0.65	-0.94	0.42	-0.24	-1.82	0.67	0.49	0.74	0.4	-0.7	-0.72	0.37	-0.38	-1.46	0.31	1.02	-1.16	-0.69	-0.56	-0.91	-0.18	-1.22	-0.97	-0.09	0.28	0.74	0.38	0.3	-1.75	-1.62	-0.39	0.15	-0.26	0.54	0.68	0.25
YBR234C_ORF	|| ARC40 || actin filament organization* || structural constituent of cytoskeleton || YBR234C || Arp2/3 complex subunit, 40 kilodalton || 1454409	-0.44	-0.58	-0.59	-0.23	-0.34	0.94	0.22	0.85	-1.26	0.93	0.66	-0.87	0.38	1.33	1.51	1.01	0.98	0	-0.27	0.61	1.97	0.22	0.12	0.6	0.8	-0.19	-0.41	0.11	0.6	0.42	-0.44	0.4	-0.63	0.18	-0.81	0.58	0.67	0.76	0.53	1.3	-0.19	0.19	0.29	-0.08	0.29
YHR019C_ORF	|| DED81 || asparaginyl-tRNA aminoacylation || ATP binding* || YHR019C || asparaginyl-tRNA synthetase || 1456718	-2.06	-2.44	-2.78	-2.03	-1.86	-1.61	-2.2	-1.21	-1.48	-1.12	-1.73	-0.82	-1.25	-3.27	0.09	-0.82	-1.18	-0.74		-1.61	-0.16	-1.17	-1.16	-0.21	-1.76	-1.27	-1.48	-1.23	-1.83	-1.23	-1.98	-1.57	-1.79	-1.46	-3.36	-1.4	-1.74	-0.62	-1.68	-2.1	-1.2	-1.28	-0.83	-0.61	-1.16
YOR357C_ORF	|| SNX3 || protein localization || protein binding* || YOR357C || Grd19p contains the PX domain found in human SNX1 (Sorting Nexin-1). Localized predominantly to the cytosol, however, a minor amount associates with membranes. In vps27 mutant cells, Grd19p-HA localizes in the prevaculoar compartment. || 1453127	0.24	-0.87	-0.91	-0.04	-0.33	0.2	-1.69	0.04	0.84	-0.11	0.26	1.39	-0.04	-0.47	1.33	1	1.3	0.47	-0.01	0.52	0.18	0.14	-0.36	0.01	2.08	0.07	0.36	0.17	0.32	0.79	-0.49	-0.27	-0.25	0.12	0.69	0.46	0.27	-0.83	-0.26	0.3	0.21	-0.7	0.89	0.61	0.34
YKL081W_ORF	|| TEF4 || translational elongation || translation elongation factor activity || YKL081W || translation elongation factor EF-1gamma || 1452466	-1.69	-2.52	-2.49	-1.9	-2.07	-1.08	-3.17	-1.92	-1.25	-1.82	-1.59	-1.59	-1.28	-3.17	0.18	-0.84	-0.98	-0.55	-1.01	-1.56	-0.11	-1.21	-1.25	-0.07	-0.78	-1.84	-1.93	-1.52	-0.43	-1	-1.91	-0.78	-2.08	-0.78	-0.79	-1.27	-0.63	-2.46	-2.31	-1.58	-0.47	-1.05	-0.81	-0.79	-1.09
YLR447C_ORF	|| VMA6 || vacuolar acidification* || hydrogen ion transporting ATPase activity, rotational mechanism || YLR447C || vacuolar ATPase V0 domain subunit d (36 kDa)|vacuolar H(+) ATPase 36 kDa subunit (D subunit of VO sector) || 1456301	-1.52	-2.01	-1.7	-1.47	-2.83	-0.67	-1.92	-0.9	-1.6	-1.13	-1.58	-1.26	-0.03	-1.85	1.05	-1.05	-0.96	-0.24	-2.43	-1.55	-0.74	-1.08	-0.66	0.42	-0.38	-1.47	-1.6	-0.73	-0.88	-1.34	-1.91	-1.73		-0.71	-0.9	-1.15	-0.09	-1.17	-1.65	-0.93	-0.32	-0.97	-0.42	-0.74	-1.11
YDR172W_ORF	|| SUP35 || mRNA catabolic process, deadenylation-dependent decay* || translation release factor activity || YDR172W || translation termination factor eRF3 || 1450298	-1.23	-3.16	-1.69	-1.67	-2.01	1.9	-1.8	-2.06	-6.18	-1.19	-0.8	-3.6	-1.15	-0.18	-0.33	-0.18	-0.6	-0.35	-2.96	-1.35	1.18	-1.51	-1.37	-0.79	-0.48	-1.36	-1.31	-1.68	-1.99	-2.11	-2.21	-2.16	-1.59	1.08	-1.96	-1.83	-1.96	-1.06	-1.76	-1.29	-0.04	-0.9	-1.09	-0.19	-1.09
YOR116C_TIL_3601_3900_210_ORF	|| RPO31 || transcription from RNA polymerase III promoter || DNA-directed RNA polymerase activity || YOR116C || YBOX_TIL1000305:TIL_YOR116C_3601_3900_210_0 || 1458175	-1.62	-1.5		-2.59	-2.39	-2.4	-2.2			-1.42	-2.6	-3.41	-0.54	-1.03	-0.71	0.03	-0.67	-1.89		-1.94	-0.99	-1.29	-0.97	-1.98	0.59	0.36	-1.99	-1.92	-1.59	-2.71	-3.14	-2.43	-0.43	-2.08		-2.63		0.78	-0.39	0.13	-0.28	-1.04	-2.48	-1.98	-2.12
YLR436C_ORF	|| ECM30 || cell wall organization and biogenesis || molecular_function || YLR436C || ExtraCellular Mutant || 1451816	-1.25	-2.03		-1.8	-2.41	-1.5	-1.26	-0.85		-0.01	-1.04	-3.32	-3.04		-1.32	-0.39	0.81	-0.46		-2.57	-0.78	-1.02	-0.99	-1.73	-4.37	0.94	-2.54	-1.98	-2.57	-1.59	-3.78	-0.91	-0.43	0.27	-3.71	-2.42		1.32	-0.52	-0.78	-0.85	-0.61	-1.64	-0.8	-2.3
YEL046C_ORF	|| GLY1 || threonine catabolic process* || threonine aldolase activity || YEL046C || threonine aldolase || 1451626	-0.58	-1.64	-1.48	-0.22	-1.04	-0.65	-1.1	-0.41	-0.87	-0.1	-0.2	-0.11	-0.87	-1.58	0.75	0.39	0.58	-0.1	-0.3	0.62	0.63	-0.35	0.75	0.3	-1.38	-0.99	-0.47	-0.22	-0.31	-0.22	-0.49	-0.88	-0.41	-0.57		-0.41	-5.62	-0.02	-1.8	0.12	-1.47	-0.97	-0.21	-0.95	-0.17
YPL028W_ORF	|| ERG10 || ergosterol biosynthetic process || acetyl-CoA C-acetyltransferase activity || YPL028W || acetoacetyl CoA thiolase || 1456492	-0.98	-1.78	-2.07	-1.54	-2.14	-0.77	-2.65	-1.29	-2.29	-1.35	-1.38	-1.15	-0.26	-1.68	1.14	-0.93	-0.64	-0.43	-4	-1.31	-0.31	-0.85	-0.7	0.22	-0.67	-0.44	-1.14	-1.31	-1.51	-0.09	-1.7	-1.61	-1.46	-0.93	-6.24	-1.09	0.06	-1.96	-0.87	-1.18	-1	-1.02	-0.62	-0.94	-0.92
YER003C_ORF	|| PMI40 || protein amino acid glycosylation* || mannose-6-phosphate isomerase activity || YER003C || mannose-6-phosphate isomerase || 1451934	-1.77		-1.55	-1.56	-2.63	-0.5	-1.9	-1.95	-4.25	-0.6	-1.67	-1.19	-0.05	-1.3	0.17	-1.33	0.2	-0.7		-0.65	-0.54	-0.76	-1.12	-0.09	-2.9	-1.01	-1.7	-1.07	-2.09	-0.89	-1.75	-1.41	-1.81	-0.09		-2.1	-0.04	-1.07	-0.84	-0.82	-1.4	-0.79	-0.54	-0.2	0.18
YBR263W_ORF	|| SHM1 || one-carbon compound metabolic process || glycine hydroxymethyltransferase activity || YBR263W || Serine hydroxymethyltransferase, mitochondrial || 1454126	-0.67	-1.66	-0.94	-0.8	-0.91	-0.96	0.39	0.06	-1.93	-0.82	-1.49	-0.6	-0.8	-0.49	1.13	0.33	0.21	0.11	-2.29	-0.58	0.75	-0.25	-0.39	0.22	-1.42	-0.83	-1.05	-0.96	-0.26	-0.32	-1.22	-0.53	-0.66	-0.37	-1.7	0.05	-0.14	0.22	-0.16	-0.64	-0.85	-0.05		-0.76	-0.51
YGR124W_ORF	|| ASN2 || asparagine biosynthetic process || asparagine synthase (glutamine-hydrolyzing) activity || YGR124W || asparagine synthetase || 1452292	-2.13	-2.29	-1.88	-1.62	-2.5	-1.48	-2.69	-2.35	-1.96	-1.72	-1.3	-0.54	-1.75	-2.94	-0.1	-0.56	-0.96	-0.84	-1.55	-1.6	-0.67	-1.74	-1.08	-0.79	-2.1	-1.83	-1.73	-1.27	-1.58	-1.81	-1.56	-1.85	-2.1	-1.24	-2.78	-1.71	-2.23	-3.05	-1.07	-1.44	-1.86	-1.53	-1.13	-1.7	-1.35
YBL030C_ORF	|| PET9 || aerobic respiration* || ATP:ADP antiporter activity || YBL030C || ADP/ATP translocator || 1455438	-1.44	-1.9	-1.94	-0.94	-1.19	-0.29	-0.37	-0.9	-2.15	-0.51	-0.92	-0.15	-1.52	-1.72	0.51	-0.5	0.17	-0.4	-1.11	-0.69	-0.44	-1.2	-0.82	0.18	-1.13	-0.71	-1.07	-0.76	-0.16	-0.17	-1.27	-1.3	-1.15	-0.63	-1.09	-0.53	-0.08	-1.55	-0.42	-0.56	-0.45	-0.23	-0.55	-0.49	-0.35
YDR292C_ORF	|| SRP101 || protein targeting to ER* || GTP binding* || YDR292C || signal recognition particle receptor - alpha subunit || 1457021	-0.93	-0.18	-1.41	-1.26	-1.19	-1.11	-0.79	-0.44		-0.73	0.07	-0.8	-0.17	0.65	-0.27	0.09	1.81	-0.35		-0.78	0.04	-0.66	-0.5	-0.27	-0.55	0.01	-1.29	-1.34	-0.42	-0.99	-1.24	-2.77	-1.63	-0.74	-2.16	-0.87	-2.32	0.83	0.08	-0.55	-0.56	-0.51		-0.96	-0.18
YDR011W_ORF	|| SNQ2 || response to drug* || xenobiotic-transporting ATPase activity || YDR011W || ABC transporter || 1457450	-1.63	-1.1	-3.08	-1.85	-1.58	-2.02	-0.11	1.12		-2.25	-0.25	-3.44	-2.09	-1.94	-0.52	-0.55	0.11	-1.78		-0.69	-0.72	-0.54	-0.6	-2	-1.89	-0.67	-2.3	-1.48	-0.2	-1.25	-2.41	-0.11		-1.68		-2.17		0.71	0.16	-0.63	-1.15	-0.16	-3.08	-1.58	-1.55
YBL027W_OCH_DS100_ORF	|| RPL19B || translation || structural constituent of ribosome || YBL027W || YBOX_OCH1000125:DS100_YBL027W_YBL027W_Chr02_(169380..169479)_100_bp._5_0 || 1456124	0.01	-1.16	-1.42	-0.97	-1.71	-0.09	-2.05	-1.84	0.7	-0.39	-1.18	-0.1	1.27	-1.41	1.28	0.35	-0.2	-0.45	0.08	-0.8	0.06	-0.68	-0.88	0.53	1.56	-0.09	-0.83	-0.16	-1.4	-0.73	-0.89	-0.93	-0.93	-0.15	0.39	0.36	-0.01	-1.4	-0.63	-0.01	0.44	-0.56	0.88	0.03	0.39
YHR183W_ORF	|| GND1 || response to oxidative stress* || phosphogluconate dehydrogenase (decarboxylating) activity || YHR183W || 6-phosphogluconate dehydrogenase, decarboxylating; converts 6-phosphogluconate + NADP to ribulose-5-phosphate + NADPH + CO2 || 1452450	-1.09	-1.7	-2.63	-1.47	-2.2	-0.85	-0.64	-1.95	-1.1	-1.58	-1.41	-1.27	-1.43	-2.59	0.52	-0.5	-0.9	-0.58	-1.4	-1.05	-0.24	-1.75	-1.19	0.1	-1.66	0.32	-0.95	-0.89	-1.52	-0.23	-1.2	-1.15	-0.78	-1.01	-1.3	-1.05	-0.25	-1.96	-1.79	-1.8	-0.25	-0.28	-0.76	-0.9	-1.15
YEL009C_ORF	|| GCN4 || regulation of transcription from RNA polymerase II promoter* || DNA binding* || YEL009C || transcriptional activator of amino acid biosynthetic genes || 1453363	0.19	-0.1	-0.68	0.58	0.49	1.34	-1.62	-0.22	1.18	0.17	-0.15	1.54	0.36	-0.13	1.42	1.28	2.16	0.9	0.95	1.05	1.15	0.4	-0.79	1.1	-1.05	-0.19	1.09	2.46	0.92	2.55	-0.27	1.4	-0.04	0.52	0.19	0.21	0.65	0.22	0.06	1.27	0.18	-0.38	0.91	1.47	0.3
YGR161C-D_ORF	|| || || || YGR161C-D || TyB Gag-Pol protein; proteolytically processed to make the Gag, RT, PR, and IN proteins that are required for retrotransposition || 1458411	-2.07	-2.85	-2.94	-3.23	-2.48	-1.47	-2.97	-3	-0.88	-2.29	-2.37	-1.39	-1.59	-2.01	-2.14	-0.59	-0.84	-1.72	-1.56	-1.93	-1.54	-1.84	-2.28	-1.82	-2.95	-2.68	-2.96	-2.57	-1.71	-1.12	-1.45	-2.73	-2.62	-0.78	-2.95	-2.92	-2.02	-3.19	-3.21	-2.15	-1.78	-1.39	-2.16	-1.55	-2.44
YER178W_ORF	|| PDA1 || pyruvate metabolic process || pyruvate dehydrogenase (acetyl-transferring) activity || YER178W || pyruvate dehydrogenase alpha subunit (E1 alpha) || 1455190	-1.8	-1.87	-2.34	-2.01	-2.01	-0.12	-1.71	-1.26	-1.49	-0.84	-1.22	-1.91	-1.55	-2.69	0.8	-0.86	-1.39	-0.12	-1.38	-1.34	0.04	-1.11	-1.14	0.18	-2.3	-1.59	-1.85	-1.68	-1.62	-1.2	-1.1	-1.89	-1.38	-0.43	-0.89	-0.99	0.24	-0.18	-1.94	-1.69	-0.4	-0.51	-0.39	-0.41	-1.15
YLL045C_ORF	|| RPL8B || translation || structural constituent of ribosome || YLL045C || ribosomal protein L8B (L4B) (rp6) (YL5) || 1454930	-0.74	-1.33	-1.81	-1.15	-1.15	0.85	-2.4	-0.86	0.16	-0.31	-1.19	0.4	-0.81	-1.39	0.96	0.54	-0.69	0.68	0.16	-0.41	0.9	-0.54	-0.27	0.87	0.9	-1.29	-0.66	-0.21	-0.32	0.01	-1.07	-0.97	-0.58	0.48	0.27	0.14	-0.66	-1.05	-0.52	0.1	-0.21	-0.08	0.69	1.33	0.13
YOR007C_ORF	|| SGT2 || response to heat || molecular_function || YOR007C || small glutamine-rich tetratricopeptide repeat containing protein || 1455534	-1.21	-0.97	-1.88	-1.41	-1.84	0.36	-1.97	-1.78	-0.95	-0.96	-0.98	-0.02	-0.58	-1.49	1.06	-0.72	-0.21	0.42	-1.71	-0.66	0.34	-0.98	-0.97	0.51	0.44	-1.11	-0.54	-0.68	-0.92	0.13	-1.25	-1.07	-1.11	-0.01	-1.49	-0.8	0.51	-0.59	-1.12	-0.67	-0.66	-0.21	-0.17	-0.15	-0.84
YLR087C_TIL_7201_7500_90_ORF	|| CSF1 || fermentation || molecular_function || YLR087C || YBOX_TIL1000287:TIL_YLR087C_7201_7500_90_0 || 1458422	-1.32	-1.08	1.21	-1.86	-2.37	-1.45	-0.39	-0.64		-2.91	-1.33		0.96	2.53	-1.16	-0.28	0.28	-2.38		-0.85	-2.12	-1.02	-0.59	-4.77	-1.02	-0.53	-3.17	-0.69	-2.29	-3.56	-2.2	-0.73		-1.94		-5.42		-0.01	-1.27	0.36	2.72	-0.01	-2.92	-1.3	-2.06			2.829
YPL084W_ORF	|| BRO1 || telomere maintenance* || molecular_function || YPL084W || BCK1-like resistance to osmotic shock || 1457697	-0.9	-2.61		-0.54	-2.94	-0.42	0.1	-0.31			1.97		0.46	1.65	-1.24	-0.46	-0.6	0.25		-0.78	-0.24	0.86	-0.8		-1.96	0.23	-1.07		-0.66	-0.63	1.79	0.38	1.03	-0.07		-1.32		0.39	1.59	-0.93		-0.63	-1.24	0.06	-1.64			2.8025
YPL208W_ORF	|| RKM1 || response to drug || protein-lysine N-methyltransferase activity || YPL208W || Hypothetical ORF || 1454993	-1.74	1.14		-1.89	-1.64	-1.35	1.18	0.89		-0.39	-0.17		-0.18	3.68		-0.37	-0.35	-1.03		-0.36	-0.67	0	-0.41	-0.87	-0.98	0.03	-1.14	-2.04	-0.7	-1.05	-0.56	0.04	-1.55	-0.73		-1.73		1.94	0.68	-0.75	-0.83	0.05	-1.64	-1.31	-1.57			2.7825
YMR028W_ORF	|| TAP42 || signal transduction || protein binding || YMR028W || 42 kDa protein that physically associates with the PP2A and SIT4 protein phosphatase catalytic subunits || 1453596	-1.84		0.05	-2.21	-0.96	-1.02	-0.27	-1.31		1.08	-0.18		0.3	2.33	-0.25					-0.94		-0.6	0.56	-0.45	0.85	0.59	0.21		-0.26	-0.37	0.61			-1.1		-2.62				0.21	-0.62	-0.44	-0.79	-0.05				2.555
YBR045C_ORF	|| GIP1 || spore wall assembly (sensu Fungi)* || protein phosphatase type 1 regulator activity* || YBR045C || Developmentally-regulated protein phosphatase 1 (Glc7) interacting protein which is required for spore formation. || 1458244	-0.84	-1.79		-1.14	-0.73	-1.17	2.71	3	1.15	-0.22	2.23	-3.49	0.32		-2.26			-1.46		-1.33	-1.24		-0.65		-0.99	2.71	2.19	0.23	-0.08	-2.28	-0.46	-2.6	0.7	-0.78		-0.12		1.02	-0.48			1.47	-2.94	-1.57	1.47	2.63833	2.17833
YGR209C_ORF	|| TRX2 || ER to Golgi vesicle-mediated transport* || thiol-disulfide exchange intermediate activity || YGR209C || thioredoxin|EC 1.8.4.8 || 1450404	-0.02	-0.51	-1.56	-0.91	-1.25	-0.24	-1.36	-0.76	0.91	-0.13	1.94	0.01	0.07	-2.92	-0.18	-0.39	-0.59	-0.35	-0.01	-0.87	-0.63	-0.18	-0.32	0.35	-2.44	-0.78	-0.81	-0.29	-0.09	0.28	-0.42	-1.12	-0.97	-0.27	0.62	-0.41	-0.08	-1.01	-1.11	-0.45	-0.1	-0.53	0.61	0.57	-0.17		1.75667
YER179W_ORF	|| DMC1 || meiosis* || single-stranded DNA binding* || YER179W || meiosis-specific protein related to RecA and Rad51p. Dmc1p colocalizes with Rad51p to discrete subnuclear sites in nuclear spreads during mid prophase, briefly colocalizes with Zip1p, and then disappears by pachytene || 1454313	-4.93			-0.28	-1.39		0.27	2.47		0.55	2.19		1.75		-1.6	-1.09	-1.42	-1.47		0.08	-1	0.67		-2.32	-0.51	-0.14	0.97	-4.49	0.42	-1.15	1.39	1.44	1.35	-0.61		-0.22		1.59	-0.42	-0.23	-2.97	0.7	-1.48	-0.57	0.21	3.57
YHR046C_TIL_7_227__ORF	|| INM1 || inositol phosphate dephosphorylation || inositol-1(or 4)-monophosphatase activity || YHR046C || YBOX_TIL1000162:TIL_YHR046C_INM1_7_227 || 1458032	-1.72	-0.19	-0.98	-0.39	-1.99	0.87		3.13		0.26	1.29	-3.64	-0.07	-0.68	-1.89	-0.75	-1.31	-0.15		-0.84	0.19	-0.23	0.09	-0.7	2.08	-0.22	0.1	-0.95	-1.54	-0.84	-0.14	-1.63	0.35	0.46		-1.66		0.01		-0.94	0.2	0.14	-2.25	1.43	-0.47	3.054
YMR153C-A_ORF	|| || || || YMR153C-A || Hypothetical ORF || 1454067	-0.99	0.49	1.21	-0.36	-1.86		1.35	3.71		0.41	1.15				0.04	-0.39	2.44	-3.49		-0.13		0.45	0.9		0.24		1.28	-1.02	0.33	-0.98	1.37		1.53			-0.73			1.66	-0.44	0.64	0.1	-1.17	0.05	0.59	2.832
YORCDELTA11_LTR	|| || || || YORCdelta11 || YBOX_LTR1000015:YORCDELTA11:SGDID:S000007162:Chr:XV:438484-438176_RC_199 || 1453900	-1.67		-0.54	0.38	0.14	1.26	1.5	4.45			3.06	-3.3		2.9	-1.42	-0.46		-0.16		0.09	-0.77	0.58	-0.4		-0.28			0.73	0.07	-1.61	1.75	-0.81		-0.41		1.02		2.67	-0.54		0.64	0.75		0.86		2.82583
YCR108C_OCH__ORF	|| || biological_process || molecular_function || YCR108C || YBOX_OCH1000259:YCR108C_YCR108C_SGDID:S0028536_Chr_III_316184-315993_RC_Unc_ORF_4 || 1451250	-0.21		1.22	0.21	0.23	2.81		3.37		-0.76	-1.42	-4.11		-0.73	-1.2	-0.7	-0.92	0.89		0.15	0.65	-0.26	-0.46	-0.4	-0.41	0.43	0.35	0.09	-0.58	-0.65	0.14	1.75		1.76	2.08	-0.55		0.4	-0.35	-1.74		-0.08	-0.99	0.36	-1.24	2.7275
YLR457C_ORF	|| NBP1 || spindle pole body duplication in nuclear envelope || molecular_function || YLR457C || Nap1p Binding Protein || 1453017	0.7	-1.5	-0.6	-0.25	-0.67		2.43	2.08		0.59	1.08	-2.05	0.34	2.23	-0.58	-1.23	-1.91	-0.5		0.09	0.3	0.34	0.16	-0.69	2.4	-1.75	-1.19	-0.15	-0.03	-0.5	0.21	0.45	-0.58	0.12		-0.24		1.03	0.92	0.12	-0.02	-0.24	0.18	-0.62	0.6	2.719
YPL155C_ORF	|| KIP2 || nuclear migration, microtubule-mediated* || microtubule motor activity || YPL155C || kinesin related protein || 1453986	-3.02		-1.92	-1.58	-1.07	0.14	0.12	1.47		-0.95	1.01		0.25	-0.66	-1.41	-1.41	-1.19	-0.93		-0.2	-0.88	-0.21	-0.39	-1.81	-0.38	0.15	-0.2	-2.55	0.58	-1.02	-0.18	-0.13	-0.27	-0.78		-0.61		-0.12	-0.85	-1.98	0.3	-0.21	-0.81	0.3	-1.37	2.47417
YMR052C-A_ORF	|| || || || YMR052C-A || Hypothetical ORF || 1456501	-2.03	-2.34		-1.69	-1.03	-0.28	1.94	-0.28		-1.84	-1.83		1.23	-0.59	-1.85	-1.2	-2.34	-1.54		-1.14	-1.09	0.24	-1.3	-2.5	-2.31	-0.4	-1.54	-1.84	-0.58	-0.77	-1.08	-2.94	-2.05	-0.99		-1.85	-3.54	-1.64		-2.26	1.23	0.17	-1.59	-2.89	-1.41	2.2325
YGR004W_ORF	|| PEX31 || peroxisome organization and biogenesis || molecular_function || YGR004W || Hypothetical ORF || 1454182	-2.08	-1.77	-1.85	-0.68	-0.5	0.72	1.11	0.52		0.66	0.95	-2.5	1.04	2.42	-0.66	0.3	-0.78	-0.12		-1.05	0.27	0.13	-0.5	-1.99	-0.07		0.87	-0.87	-1.06	-0.4		0.9	0.29	-1.03		-0.86		0.23	-0.18	0.28	-0.27	0.57	-0.82	-1.47	-0.12	2.15933
YHR131C_ORF	|| || biological_process || molecular_function || YHR131C || Hypothetical ORF || 1453250	-3.39		-0.05	-1.38	-1.4	0.33	0.23	1.19		0.12	0.96	-3		0.5	-0.04	-0.14		-2.8		-1.01		0.31	-0.07	-0.69	2.35	0.59	-1.69	-0.88	-2.52	-0.64	0.61		0.66	-0.1	-0.79	-0.89		2.21	0.73	-0.51	-0.24	0.06	-0.52	-0.16	0.06	2.13833
YKL168C_ORF	|| KKQ8 || biological_process || protein kinase activity || YKL168C || Serine/threonine protein kinase of unknown function || 1457447	-0.63	0.18	-1.32	-1.36	-2.04		1.18	0.88		-0.66					-0.3	0.11	-0.85	-1.76		-1.1	0.14	0.15	-0.87	-0.94	-1.09	0.17	-0.13	-0.89	-0.93	-1.4	-3.23		0.18	-0.63		-1.5		1.61	-0.72	-0.46	-0.5	0.37		-1.32	0.01	2.064
YOR147W_ORF	|| MDM32 || mitochondrion organization and biogenesis* || molecular_function || YOR147W || Mitochondrial Distribution and Morphology || 1455744	-1.63	-4.33	-1.21	-1.74	-0.8	0.24	-0.2	0.21	-2.27	-0.86	-0.88	-1.81	-0.37	-1.16	-0.92	-0.73	-0.64	-0.5	-2.55	-0.43	-0.81	-0.43	-0.41	-0.61	-1.23	-0.28	-1.51	-1.96	-1.14	0.21	-0.53	-1.07	-1.67	-0.63		-1.88	-1.55	-0.5	-1.07	-1.3	0.65	-0.2	-0.89	-1.12	-0.83	2.02533
YDR034C-A_ORF	|| || biological_process || molecular_function || YDR034C-A || Similar to probable membrane protein YLR334C and ORF YOL106W || 1453286	-0.99	-1.87	-2.79	-1.09	-1.61	-0.68	1.47	0.03		-2.06	-1.67	0.7		-0.17	0.27	0.66	-1.51	-1.45		0.51	-0.46	-0.15	-1.99	-2.73	-0.8	-1.19	-1.81	-0.98	0.33	-0.8	-0.9	-2.19	-2.04	-0.13	-2.52	-1.39		-1.63	-0.49	-0.99	0.26	-0.12	-1.9	-1.54	-1.35	1.94333
YMR124W_ORF	|| || biological_process || molecular_function || YMR124W || Protein of unknown function; green fluorescent protein (GFP)-fusion protein localizes to the cell periphery, cytoplasm, bud, and bud neck || 1453126	-0.47	-1.37		-1.66	-1.71	0.44	0.65	0.77		-1.48	-0.89	-4.18	0.4		-2.98	-0.86		-0.77		-0.27	0.01	0.41	-0.65	-1.59	-2.23	0.79		-0.99	-2.27	-1.02	-1.93	-0.66	-1.92	-0.03		-0.97		-1.07	-0.59	-0.95	-0.05	-0.96	-0.92	-0.69		1.9225
YDR122W_ORF	|| KIN1 || exocytosis || protein kinase activity || YDR122W || Serine/threonine protein kinase || 1457932	-1.41	0.23	-1.02	-1.21	-1.92	-0.14	0.96	1.56		-0.38	-0.64	-3.33	0.31	1.37	-0.92	-1.04	-1.47	-1.14		-1.53	-0.38	-0.41	0.22	-0.88	-2.71	0.99	-0.61	-1.96	-0.78	-1.2	-1.65	-0.62	-0.56	-0.86		-1.97	-3.78	1.74	-1.73	-0.39	0.63	0.32	-1.72	-1	-0.88	1.85933
YJL127C-B_ONO_ORF	|| || biological_process || molecular_function || YJL127C-B || YBOX_ONO1000061:YJL127C-B_YJL127C-B_SGDID:S0028522_Chr_X_181628-181470_RC_Unc_ORF_15 || 1452000	-1.33	-1.45	-1.37	-2.01	-1.56	0.04	0.78	-0.92		-1.62	-1.3	-0.92	-1.1	-0.62	-0.77	-0.77	-0.99	-1.5		0.34	-0.36	0.85	-1.26	0.06	-1.15	-1.32	-0.89	-1.05	-0.81	-0.97	-1.3	-1.15	-1.63	-0.7		-1.87	-5.1	-1.31	-2.45	-0.76	0.12	-0.05	-0.07	-1.2	-1.42	1.51067
YOR362C_ORF	|| PRE10 || ubiquitin-dependent protein catabolic process || endopeptidase activity || YOR362C || proteasome component YC1 (protease yscE subunit 1) || 1454305	-1.01	-0.99	-1.34	-0.81	-0.8	-0.71	-1.55	-1.08	-2.28	-0.58	-1.28	-1.16	-1.38	-1.44	0.51	-0.34	-1.42	-0.46	-1.99	-0.73	-0.01	-0.85	-0.73	0.19	-0.45	0.04	-1.12	-1.26	-0.79	-0.24	-1.41	-0.5	-0.56	-0.8	-1.65	-1.05	1.47	4.32	4.97	-0.69	-0.45	-0.7		-0.61	-0.05
YPL110C_ORF	|| GDE1 || glycerophospholipid catabolic process || glycerophosphocholine phosphodiesterase activity || YPL110C || Hypothetical ORF || 1454205	-1.45			-1.99	-1.6	-0.51	-1.61	-2.1			-3.23				-1.12	-0.19	-2.75	-0.77		-2.08	-0.58	-0.36		-2.94	-0.71	-0.73	-0.87		-1.15		-3.43			-0.59		-1.97		2.67	1.45	-2.05	-0.15	-0.57	-2.66	-1.16	0.71
YOL138C_ORF	|| || telomere maintenance || molecular_function || YOL138C || Hypothetical ORF || 1456302	-1.91	-3.77	2.16	-1.5	-1.54	-0.17		1.42		-0.36	-0.97			1	-1.61	-0.24		-1.21		-1.42	-0.14	-0.31	-0.42	-2.52	-1.57	-0.78	-0.73	-1.97	-0.75	-0.17	-0.44	-0.14	-2.63	-0.19		-1.43		3.15	1.46	-0.06	1.37	-0.11	-4.57	-0.65
YLR106C_ORF	|| MDN1 || rRNA processing* || ATPase activity || YLR106C || midasin || 1456336	-2.23	-3.5		-2.25		-2.48	-1.82	-2.99		-0.26	-1.17	-2.15	-2.58	-3.39	-2.1	-0.18	0.61	-1.31		-2.99	-1.42	-1.08	-1.46	-2.05	0.94	-1.35	-2.29	-1.58	-2.2	-2.35	-0.96		-1.16	0.18	-5.47	-4.06		1.71	-0.43	-2.07	3.47	3.65	-2.46	-2.19	-1.05
YMR119W-A_ORF	|| || || || YMR119W-A || Hypothetical ORF || 1452825	-5.11			-1.26	-0.38		0.24	-1.21		-0.46						-0.3	-1.97	-0.97		-0.31	-0.7	-0.17	0.92	-1.87	-2.8	0.66		-1.1	-0.21	-0.61	0.65		-1.12	-0.82		-1.36		1.42	0.58	-1.98	-0.78	-0.4	-1.3	-0.59	-0.12
YNL221C_ORF	|| POP1 || rRNA processing* || ribonuclease P activity* || YNL221C || nuclear RNase P and RNase MRP component || 1451518	-1.34	-4.12	-0.12	-0.95	-0.22	-0.64	-1.04	1.16		-0.21	-0.12	-2.08		-0.44	-0.8	-0.18	-0.26	-1.19		-1.32	-0.27	-0.48	-0.45	-0.94	-0.4	0.71	-0.54	-1.4	-0.4	-0.76	0.14	-0.47	0.38	-0.25		-1.25		2.3	1.05	-0.74	1.09	-0.51	-0.58	-0.49	-0.15
YNL175C_ORF	|| NOP13 || ribosome biogenesis and assembly || RNA binding || YNL175C || Protein of unknown function, localizes to the nucleolus and nucleoplasm; contains an RNA recognition motif (RRM) and has similarity to Nop12p, which is required for processing of pre-18S rRNA || 1452947	-1.1	-5.07	-2.69	-1.52	-1.23	-1.38	-0.56	-2.2		-0.69	-0.23		0.47	-0.21		-1.25		-1.27		-1.35	-1.1	-0.68	0.54	0	1.51	-1.31	-0.58	-1.83	-1.6	-1.18	-0.77	-2.05	-1.03	0.01	-3.12	-1.1		0.41	0.97	-0.49	-1.52	-0.84	-0.34	-1.01	-1.29
YGR061C_ORF	|| ADE6 || 'de novo' IMP biosynthetic process* || phosphoribosylformylglycinamidine synthase activity || YGR061C || 5'-phosphoribosylformyl glycinamidine synthetase || 1454546	-2	-1.75		-2.42	-2.43	-1.65	-1.36	-1.11		-1.61	-1.36	-1.52	-2.35	-2.23	-1.16	-0.12		-1.02		-1.38	-0.64	-1.34	-1.38	-0.91	-0.52	-2.52	-1.45	-1.91	-1.54	-1.83	-1.39	-0.9	-1.84	-0.51	-3.71	-0.54		1.16	0.42	-2.02	-0.74	-0.15	-1.84	-1.63	-1.69
YMR064W_ORF	|| AEP1 || translation || molecular_function || YMR064W || basic hydrophilic 59 kDa protein || 1452728	-0.49	0.27	-1.35	-0.76	-1.66	-0.55				-2.34	-3.47		-0.04	1.26	0.11	-0.15		-0.42		0.34	0.74	0.29	0.29	0.23	-3.25	0.4	-0.09	-0.71	0.27	-0.51	1.04	-2.68		1.16		-1.95		2.27	1.98	0.12	-0.37	0.63	-1.13	-0.04	0.97
YER074W-A_INT_2	|| YOS1 || ER to Golgi vesicle-mediated transport || molecular_function || YER074W-A || YBOX_INT1000124:INT_2_YER074W-A:NC_001137:307953..308063 || 1457874	-0.5			-0.19	-0.86			1.67		1.19	1.61	-2.15	-0.56			-0.28	-0.46	0.77			-1.69		-0.71		-0.52		0.83	-1.7		0	0.54		-0.8	0		-0.24		3.17	1.55		0.31	0.58	-2.8	0.91	1.24
YHR099W_ORF	|| TRA1 || DNA repair* || histone acetyltransferase activity || YHR099W || ATM/Mec1/TOR1/TOR2-related|NuA4 complex component || 1456529	-1.67		-2.24	-2.85	-2.22	-1.52	-1.45	0.14		-1.81	-0.55	-3.59	-0.05	0.14	-1.56	-1.23	1.37	-1.87		-2.03	-1.42	-1.28	-0.75	-1.98	-4.53	-0.1	-2.89	-0.92	-0.46	-2.05	-1.2	-1.95	-0.77	-3.6		-3.5		1.37	-0.15	-1.79	-0.26	0.32	-3.38	-1.91	-2.22
YNL247W_ORF	|| || ribosome biogenesis and assembly* || cysteine-tRNA ligase activity || YNL247W || Protein required for cell viability || 1456948	-1.61		-2.37	-2.95	-3.03	-1.27	-1.99		-4.39	-1.64	-1.85	-2.34		-2.27	-1.06	-1.48	-2.18	-1.02		-2.49	-1.29	-1.64	-1.25	-1.1	-1.71	-2.23	-2.1	-1.38	-2.6	-2.21	-2.87	-0.33	-3.37	-2.36		-2.42		0.65	0.06	-2.45	-1.63	-1.54	-1.62	-1.72	-1.83
YNR067C_ORF	|| DSE4 || cytokinesis, completion of separation || glucan 1,3-beta-glucosidase activity || YNR067C || Daughter cell-specific secreted protein with similarity to glucanases, degrades cell wall from the daughter side causing daughter to separate from mother || 1451675	-0.61	-2.33		-1.79	-1.47	-1.53	-1.56	-0.99		-1.65	-0.25	-1.7	0.12	-1.04	-0.12	0.21		-1.08		-1.54	0.15	-0.57	-0.41	-1.22	-1.74	1.01	-1.5	-1.45	-0.93	-0.79	-0.81	-1.96	0.32	-0.4	-1.96	-1.73		1.5	1	-0.98	-1.93	-0.87	-1.4	-1.89	-0.99
YOR116C_TIL_4501_4629_54_ORF	|| RPO31 || transcription from RNA polymerase III promoter || DNA-directed RNA polymerase activity || YOR116C || YBOX_TIL1000308:TIL_YOR116C_4501_4629_54_0 || 1454871	-2.25	-2.23	1.14	-2.01	-0.75	-2.28	0.4	0.39		-1.25	-1.4	-3.42	-0.08	0.08	-1.2	-0.67	2.24	-1.65		-2.13	-0.97	-1.49	-1.26		0.1	-0.85	-1.28	-1.42	-0.94	-1.8	0.06		-0.8	-1.17		-3.89		2	1.13	0.08	-1.13	-1.69	-6.09	-1.54	-0.39
YNL085W_ORF	|| MKT1 || positive regulation of protein biosynthetic process* || nuclease activity || YNL085W || retroviral protease signature protein || 1453668	-2.53	-1.03	-2.89	-1.57		-1.2	-0.66	0.28		-0.28	-0.28		-1.69	-0.98	-1.51	-1.38	-2.15	-1.19		-1.67	-1.71	-2.17	-1.69	-1.41	-3.67	-1.67	-1.04	-1.83	-1.09	-2.71	-1.39	-2.69	-1.45	-1.78		-2.89		1.15	0.34	-1.48	0.67	-0.49	-2.14	-0.94	-2.1
YLL040C_ORF	|| VPS13 || sporulation (sensu Fungi)* || molecular_function || YLL040C || homologous to human COH1 || 1450734	-3.08		-1.3	-2.35	-2.66	-1.75	-0.52	0.52		-1.46		-1.87	-2.33	-3.45	-1.17	-0.82	-1.91	-1.53		-1.67	-1.75	-0.77	-1.07	-1.81	-3.12	0.4	-1.37	-1.79	-0.36	-1.37	-1.19	-2.02	-1.58	-1.69		-2.52		0.6	0.2	-0.21	4.59	0.86	-2.23	-2.88	-2.12
YGR051C_ORF	|| || || || YGR051C || Hypothetical ORF || 1457775	-1.6			-1.7	-0.08	1.34				-0.38	2.25				-1.09			0.76			0.89		-0.3		1.01			1.2	0.3	-1.29	0.79					-0.7		2.19	1	-0.1		0.43	-0.73	-0.31	1.33
YCR016W_ORF	|| || ribosome biogenesis and assembly || molecular_function || YCR016W || Hypothetical ORF || 1451465	-0.85	-3.33		-1.61	-1.49	-0.77	-0.48	0.99		-0.36	-1.16	-2.19	-0.38	-0.81	-0.56	-0.22		-0.73	-2.5	-1.34	-1.21	-0.17	-0.2	1.01	2.59	-1.46	-1.87	-0.6	-0.44	-0.47	-0.84	-0.96	-0.52	-0.45	-0.02	-0.7		1.41	0.38	-0.39	-0.43	-0.49	0.31	-0.75
YJL002C_ORF	|| OST1 || protein amino acid N-linked glycosylation* || dolichyl-diphosphooligosaccharide-protein glycotransferase activity || YJL002C || 64 kDa, alpha subunit of oligosaccharyltransferase complex; homologous to mammalian ribophorin I || 1450221	-0.79	0.68	-1.93	-0.92	-1.6	-0.32	-1.72			-1.21	-3.54	-1.74	-0.35	-1.76	0.68	-0.14	-0.74	-0.23		-0.88	0.38	-0.47	0.22	0.1	-2.08	-0.26	-0.52	-0.71	-0.11	-0.6	-2.19	-0.53	-1.61	-0.29	-0.69	-0.96		2.57	1.01	-0.6	-1	-0.32	-0.41	-0.52	-0.59
YDR366C_ORF	|| || biological_process || molecular_function || YDR366C || Hypothetical ORF || 1450657	-1.86		-0.85		-1.74					-0.2	-1.59	-3.89				-1.29	-2	-2		-1.13	-1.17	-0.52				1.76	0.87		0.09	-1.1	-0.21	0.59	-0.32	-0.14		-1.66		1.27	1.16	-2.04		0.13	-4.05	-1.02	-0.18
YPR112C_ORF	|| MRD1 || 35S primary transcript processing || snoRNA binding* || YPR112C || Multiple RNA Binding Domain; essential for synthesis of the small ribosomal subunit || 1454291	-0.78	-0.09	-2.04	-1.67	-1.27	-0.99	-0.93	-0.21		-2.61	-2.18	-2.56	-0.14	-0.38	-1.21	-0.34	-1.02	-0.33		-0.9	-0.36	-0.94	-0.67	-1.26	3.04	-1.25	-1.38	-0.52	-1.21	-1.17	0.55	-1.58	-1.3	-0.5	-4.38	-0.95		2.04	0.99	-0.22	-1.9	-0.84	-1.79	-0.98	-0.6
YGR280C_TIL_4_200__ORF	|| PXR1 || ribosome biogenesis and assembly* || molecular_function || YGR280C || YBOX_TIL1000082:TIL_YGR280C_PXR1_4_200 || 1454167	-0.2	-1.34	0.3	-0.86	-2.14	-0.12	-0.4	1		-0.24	0.57	-1.19	0.56	-0.89	-0.83	0.51	-0.82	0.12	-1.12	-0.56	0.19	0.13	-0.15	0.67	5.04	-0.72	-0.89	-1.17	-0.46	-0.28	0.6	-0.14	-0.4	0.13	0.21	0.63		0.12	3.55	0.08	-0.18	-0.46	0.48	-0.37	0.3
YDR026C_ORF	|| || biological_process || DNA binding || YDR026C || Hypothetical ORF || 1458405	-0.18	-2.06		-0.66	-3.09	-0.09	0.27	-0.69		-0.19	-0.39	-1.83	-1.22	1.38	-0.78	-0.2	-1.18	0.49	-4.81	-1.29	-0.5	-0.01	0.72	-0.38	1.53	1.31	-0.38	-0.72	-0.49	-0.41	-0.15	0.03	-0.31	0.09	0.46	-0.78		1.71	0.66	-0.7	-0.03	0.2	0.02	0.76	0.64
YNL102W_ORF	|| POL1 || DNA replication* || alpha DNA polymerase activity || YNL102W || DNA polymerase I alpha subunit p180 || 1452505	-1.12		-0.65	-1.44	-2.19	-1.42	-0.16	-0.99		-1.44	0.7		-1.09		-1.71	0.11	-1.15	-1.44			-0.74	0.28	-0.57	-2.07	0.68	-0.9		-1.82	-1.56	-1.26	-0.98	-0.98	-1.34	-0.59		-0.87		1.3	1.3	-1.58	-0.19	-0.46	-1.58	-0.98	-0.72
YNL287W_ORF	|| SEC21 || ER to Golgi vesicle-mediated transport* || molecular_function || YNL287W || PEST sequence-containing protein|non-clathrin coat protein || 1452535	-1.85	-0.87	0.04	-2.68	-3.11	-0.86	-2.04	-2.79		-0.67	-0.62	-2.05	-1.56	-1.75	-0.76	-0.35	0.47	-1.03		-1.59	-1.34	-1.78	-0.5	-1.21	-2.49	-2.19	-1.35	-1.68	-2.48	-2.38	-0.81	-3.98	-0.9	-1.14	-3.43	-2.66		1.17	0.7	-2.39	-1.27	-1.87	-1.76	-1.62	-0.79
YOR015W_ORF	|| || || || YOR015W || Hypothetical ORF || 1454032	-2.38		-0.09	-1.35	-1.23	-0.86	0.25	-0.28		-2.66	-1.57		-3.22	-1.04	-0.95	-0.45	-0.83	-2.49		-1.1	-0.01	-0.71	-1.13	-0.77	-3.07	0.42	-1.91	-0.94	-2.01	-1.42	-0.34	-0.13	-0.34	0.3	-3.16	-1.5		2.1	0.6	-0.09	-0.6	-1.06	-1.34	-1.05	-0.66
YML065W_ORF	|| ORC1 || chromatin silencing at silent mating-type cassette* || ATPase activity* || YML065W || origin recognition complex (ORC) 120 kDa (largest) subunit|similar to Cdc6p, Cdc18p, and Sir3p and to proteins from K. lactis, S. pombe, and humans || 1458599	-2.42	-0.96		-1.49	-2.14	-0.81	-0.97	1.32		-0.63	0.18	-7.13	-0.08	-1.8	-0.77	-1.08	-0.76	-0.6		-1.31	-1.5	-0.78	-0.7	-5.88	1.37	0.58	-0.9	-2.01	-0.97	-2.07	-0.34	0.1	-2.01	-0.84		-1.39		0.8	0.91	-0.94	-0.87	-0.52	-1.42	-1.03	-1.53
YDR457W_TIL_3001_3300_230_ORF	|| TOM1 || regulation of cell size* || ubiquitin-protein ligase activity || YDR457W || YBOX_TIL1000227:TIL_YDR457W_3001_3300_230_0 || 1450719	-3.21	-1.56	-2.28	-2.66	-1.56	-2.53	-1.23	-0.81		-2.8			-0.82		-1.4	-0.57	-0.82	-2.28		-3.07	-1.01	-0.96	-0.57	-3.9	-1.44	-3.33	-5.06		-1.83	-1.24	-3.06	-2.53	-0.35	-2.1		-2.97		0.44	0.24	-2.22	-1.6	-1.64	-4.35	-2.15	-2.41
YAL030W_INT_1	|| SNC1 || endocytosis* || v-SNARE activity || YAL030W || YBOX_INT1000001:INT_1_YAL030W:NC_001133:87389..87501 || 1456209	-1.04			-0.94	-1.82	0.78				1.64	1.57	-2.3	-1.74	1.01	-0.39	-0.23	2.67	-0.77		0.18			-0.28	-2.52	0.07		-0.35	-1.91	-0.18	-0.94	1.99	2.06	-1.3	0.27		-0.07		1.65	0.98	1.19		0.3	-1.56	0.97	0.78
IGR_CHR12:(998726..999624)_287	|| || || || || YBOX_IGR1000212:gLR13_6:gLR13_6:chr12.fsa:(998726..999624):899:bp._287_0 || 1452669	-2.58			-0.98	-2.3	-1.3	-1.69	-0.95		-1.27	-0.14	-5.72	-0.18	-0.34	-1.54	-1.23	-1.59	-1.86		-2.31	-1.43	-1.3	-0.74	-3.28	-1.46	-2.42	-1.11	-3.43	-1.75	-2.54	-2.39	-0.22	-1.41	-1.87		-4.05		0.98	0.24	-2.38	-0.04	-1.22	-3.1		-1.62
IGX_YP_335124C	|| || || || || YBOX_IGX1000043:IGX_583_2:IGX_YP_335124C:[chromosome=XVI]:(complement(335049..335149)) || 1452365	-0.9		-1.72	-1.34	-0.99	-0.86	-0.26			-3.23	-0.24			-0.23	-0.3	-1.11	1.87	0.01		-1.57		-0.3	-0.24	-0.47	-2.93	0.94	-2.07	-0.74	-0.99	-1.33	-2.58	-3.36	-0.22	0.04		-1.64		1.94	0.62	-0.62	-1.51	-0.68	-0.75	-1.22	-2.79
YNL140C_ORF	|| || || || YNL140C || Hypothetical ORF || 1458491	-3.6	-0.99	-1.08	-1.62	-1.1	-0.55	-0.44	-0.67		-0.31	-0.48	-2.39	-1.94	-1.35	-1.48	-0.72	-1.14	-0.83		-1.79	-0.25	-0.67	0.35	-1.86	-0.93	-1	-3.54	-1.05	-0.67	-1.27	-1.5	-2.24	-2.55	-1.3		-1.49		0.8	0.87	-0.69	0.77	0.33	-1.57	-0.58	-1.39
YPL210C_ORF	|| SRP72 || protein targeting to ER* || signal sequence binding || YPL210C || signal recognition particle component || 1450209	-1.11	-1.07		-1.98	-0.86	-1.47	0.44	1.2		-1.98	-0.89	-2.09	0.26	0.2	-1.41	-0.12	-0.54	-0.12		-1.56	-0.77	-0.84	-0.94	-0.72	-1.79	-0.75	-1.98	-2.31	-1.02	-1.43	-1.26		-1.37	-0.96		-1.11		1.15	1.35	-1.68	-1.11	-0.25	-1.16	-1.23	-0.36
YNL316C_ORF	|| PHA2 || phenylalanine biosynthetic process, prephenate pathway || prephenate dehydratase activity || YNL316C || prephenate dehydratase || 1454983	-0.33	-0.44		-1.44	-1.47	-0.79	0.32			-0.75	0.86	-6.79		2.45		-1.28	-0.74	-0.47		-1.12	0.05	-0.49	0.12	-0.42	-0.81	0.17	-2.86	0.05	-1.25	-1.17	-0.79	0.34	-0.45	-0.66		-1.04		2.14	0.99	-0.29	-0.1	-0.48	-0.37	-0.34	-0.41
YNL118C_ORF	|| DCP2 || mRNA catabolic process* || mRNA binding* || YNL118C || Protein required for the decapping of mRNAs, functions to allow the production of active Dcp1p, contains a pyrophosphataseJMutT motifJand several alpha-helical leucine-rich motifsJ || 1452581	-2.02		0.76	-2.16	-1.77	-1.36	-0.68			-1.52	-1.42		0.2		-1.06	-0.55	-1.83	-1.69		-3.51	-0.51	-0.12	-0.43	-1.81	-2.27	0.15	-1.26	-3.22	-1.82	-1.26	-1.81		-1.53	-0.99		-0.95		0.87	1.5	-0.07	2.25	0.18	-1.29	-0.52	-0.33
YHR111W_ORF	|| UBA4 || pseudohyphal growth* || URM1 activating enzyme activity || YHR111W || Protein that activates Urm1p before its conjugation to proteins (urmylation); one target is the thioredoxin peroxidase Ahp1p, suggesting a role of urmylation in the oxidative stress response || 1451159	-2.57		-3.19	-0.62	-0.1	-0.53	-0.92	-0.41		-0.14	-1.03	-1.49	1.87	0.54	-0.28	0.78	-0.17	-0.18		-1.29	-0.01	0.48	-0.28	-1.14	0.11	0.17	-0.78		0.2	-0.36		0.61	1.76	0.02		-1.29		1.79	-0.09	-0.88	-0.32	-0.11	-0.59	-1.16	-1.07
YIL138C_ORF	|| TPM2 || actin filament organization* || actin lateral binding || YIL138C || tropomyosin isoform II || 1455433	-0.98	-1.09	-3.23	-2.61	-2.18	-0.6	-1.45	-1.74	-0.49	-0.7	-1.41	-2.15	-1.63	-4.04	0.11	-1.34		-0.65	-0.99	-1.73	-0.82	-0.22	-0.32	0.95	1.47	-1.2	-1.98	-1.33	-1.87	-0.6	-1.5	-1.55	-2.25	-0.52	-1.89	-0.85	1.44	-0.13	-0.01	-0.7	0	-0.47	0.84	-0.39	1.49
YPL085W_ORF	|| SEC16 || vesicle-mediated transport* || structural molecule activity || YPL085W || vesicle coat component || 1456836	-2.13	-0.61	-2.49	-1.58	-2.32	-1.91	-0.99	-1.47		-1.71	-0.2	-3.11	0.54	0.34	-1.91	-1.42	-1.43	-1.86		-2.01	-1.96	-1.43	-1.04	-1.38	-2.15	-2.2	-1.62	-2.37	-1.43	-1.71	-1.65	-2.08	-1.29	-1.52		-2.56		1.24	-0.01	-1.53	-1.72	-1.43	-2.08	-1.83	-1.89
YNR074C_ORF	|| AIF1 || response to singlet oxygen* || oxidoreductase activity, acting on NADH or NADPH, disulfide as acceptor || YNR074C || putative reductase || 1451085	-0.97	-2.05	-0.95	-0.62	-0.48	-0.56	-0.44	1.14		-0.39	0.27			1.63	0.46		-0.35	-1.8		-0.32	0.37	0.15	-0.1	-0.36	0.42	-0.33	-0.55	-0.46	-0.62	-0.98	0.97		0.29	-0.02		-0.88		1.84	0.96	-0.99	-0.33	-0.19	-0.92	-0.58	-1.03
YLR459W_ORF	|| GAB1 || attachment of GPI anchor to protein || GPI-anchor transamidase activity || YLR459W || fifth component of GPI transamidase that may be involved in the recognition of either the GPI attachment signal or the lipid portion of GPI. || 1451254	-0.56	-1.74	-0.06	-0.77	-0.54	-0.12	-0.09	0.14		0.14	-0.97	-1.12	0.28	-0.73	0.31	-0.33	1.29	0.16		-0.67	0.39	-0.04	-0.71	-0.17	-2.66	-0.57	-0.42	0.71	-0.26	0.52	-0.76	-1.73	-2.3	0.4	-1.99	-1.36		2.72	0.63	0.73	-0.48	-0.43	-0.26	-0.33	-0.29
YML102W_ORF	|| CAC2 || DNA repair* || transcription regulator activity || YML102W || chromatin assembly factor-I (CAF-I) p60 subunit || 1450937		-0.2	-0.89	0.67	-0.45	-0.18	0.18			0.51	1.16		0.66	0.28	0.46	0.69		-0.1		0.26	0.33	0.47	0.63	0.18	1.92	2.7	0.35	0.59	0.46	0.08	0.81	0.22	0.21	0.04	-0.63	-0.26		2.67	1.7		-0.34	-0.3	-0.46	-0.95	-0.97
YKL193C_ORF	|| SDS22 || chromosome segregation* || enzyme regulator activity* || YKL193C || Glc7p regulatory subunit || 1452108	-1.08	-2.28		-2.13	-1.33	-1.08	-0.09			0.29	-1.28	-4.29	0.56	-0.13	-0.89	-1.12	-1.64	-0.92		-2.25	-1.22	-1.01	-1.23	-0.25	-3.6	-1.1	-0.84	-1.14	-1.38	-1.01	-3.05	-0.28	-1.22	-0.99		-1.26	-0.34	1.82	0.61	-2.04	-0.65	-0.29	-0.93	-1.08	-0.58
YMR033W_INT_1	|| ARP9 || RNA elongation from RNA polymerase II promoter* || general RNA polymerase II transcription factor activity* || YMR033W || YBOX_INT1000243:INT_1_YMR033W:NC_001145:337817..337902 || 1455356	-0.1			0.13	-1.47	-0.05		2.19		0.04	2.01	-2.1						0.23			0.5						0.79	-0.95		-0.86				-1.47				2.09	1.72			0.72	0.73
YKR001C_AAA_22_NCR	|| VPS1 || protein targeting to vacuole* || GTPase activity || YKR001C || POLYA_DS100_YKR001C_chr=XI_(complement(440031..440130))_22:YBOX_AAA1000024 || 1455829	-0.13	-0.3		-1.41	-1.52	-2.1	0.49	2.25		-1.43	-0.53				-1.25	-0.42		-0.85		-1.16	-1.44	-0.47	-3.14	-3.01	-1.8	2.48	-1.26	-2.92	-0.26	-1.93		-0.32	1.02			-0.49		1.39	1.7	1.23	-1.69	-0.65		-0.46
YDR017C_ORF	|| KCS1 || response to drug* || inositol hexakisphosphate kinase activity || YDR017C || Inositol polyphosphate kinase || 1452183	-0.82	-0.92	-0.01	-1.57	-0.7	-0.81	0.64			-1.35	-0.36	-1.59	-0.09	0.04	-1.22	-0.62	-1.25	-1.15		-1.5	-0.39	-0.06	-0.81	-0.82	-0.49	-0.91	-1.12	-1.98		-1.1	-1.34	-1.6	-1.28	-0.55		-1.02		2.69	0.46	-0.32	-0.16	0.48	-0.85	-0.64	0.3
YDR457W_TIL_5701_6000_68_ORF	|| TOM1 || regulation of cell size* || ubiquitin-protein ligase activity || YDR457W || YBOX_TIL1000237:TIL_YDR457W_5701_6000_68_0 || 1457617	-1.75	-1.39	-1.22	-2.56	-2.52	-3.1	-2.01			0.11	0.07	-2.59	-0.85	-1.65	-1.63	-0.7	1.24	-3.71		-3.61	-1.69	-1.36	-1.38	-2.97	-1.38	0.92	-2.76	-2.83	-1.49	-2.5	-0.59	-0.78	-1.62	-2.38		-4.49		0.04	0.94	-2.34	-0.65	-1.19	-3.2	-2.69	-0.48
YML059C_ORF	|| NTE1 || phosphatidylcholine metabolic process || hydrolase activity* || YML059C || Hypothetical ORF || 1458340	-1.03		-1.52	-1.42	-1.55	-2.07	0.59	0.97		-1.69	0.41	-2.47	0.44			-1.05	-1.05	-1.56		-0.5	-0.85	-0.68	-0.89	-2.46	-0.94	-0.73	-1.72	-1	-0.97	-1.16	-2.35	1.96	-0.53	-0.74		-2.37		1.09	0.89	-0.32	0.67	-0.26	-1.88	-1.52	-0.4
YBR028C_ORF	|| || biological_process || protein kinase activity || YBR028C || Hypothetical ORF || 1453489	-0.63	-0.96	0.35	-0.85	-1.92	-0.81	0.87	0.22		-0.17	0.67	-2.11		0.94	-0.83	-0.89		-1.85		-1.01	-0.1	0.05	-0.08	-0.05	-0.11	0.95	-1.54	-0.53	-1.55	-1.04	0.09	-0.12	0.18	0.17	-2.1	-1.05		1.08	2.04	0.37	-0.27	-0.16	-0.74		1.16
YLR087C_TIL_1801_2100_102_ORF	|| CSF1 || fermentation || molecular_function || YLR087C || YBOX_TIL1000266:TIL_YLR087C_1801_2100_102_0 || 1455273	-1.47	-0.37	-1.23	-1.2	-1.24	-1.88	-0.98			-1.22	-0.34	-2.96	-0.33	1.51	0.68	0.26	0.11	-1.75		-2.23	-0.9	-0.24	-0.37		-0.54	-1.56	-2.54	-1.74	0.03	-1.41	-3.56	0.96	-1.1	-1.02		-1.84		1.95	0.49	-1.7	0.42	-1.09		-2.13	-0.57
YPL065W_ORF	|| VPS28 || telomere maintenance* || protein binding || YPL065W || soluble, hydrophilic protein involved in transport of precursors for soluble vauolar hydrolases from the late endosome to the vacuole || 1454726	-2.72	-1.03	0.69	-0.82	-0.3	-0.81		1.2		-0.11	1.37	-2.42	-1.67	3.19		-0.93	-1.21	-0.43		-1.06	-0.49	-0.81	0.9	-1.04	-3.45	0.82	-0.61	-0.24	-0.06	-0.69	-0.4	0.72	-0.63	-0.51		-0.54		1.51	1.46	-0.87	-0.69	-0.11	-0.99	0.21	0.36
YBL066C_ORF	|| SEF1 || biological_process || molecular_function || YBL066C || transcription factor (putative) || 1457616	-0.7	-3.15	-0.83	-0.08	-0.9	-0.2	-0.35	0.61			0.22	-3.55	-0.41	0.61	-1.7	-1.03	-0.72	0.31		-1.24	-0.94	-0.4	-0.46	-2.33	-2.76	2.47	-1.2	-0.53	-0.53	-1.63	-0.39	-0.62	0.56	-0.51	-1.54	-2.1		1.57	0.8	0.03	0.09	-0.29	-0.72	0.96	0.78
YPL181W_ORF	|| CTI6 || histone deacetylation* || histone deacetylase activity* || YPL181W || Protein that relieves transcriptional repression by binding to the Cyc8p-Tup1p corepressor and recruiting the SAGA complex to the repressed promoter; contains a PHD finger domain || 1456388	-1.59	0.39	0.08	-0.6	-1.59	-0.74	-0.66			-0.43	-0.85	-2.82		2.8	-0.95	-0.92	1.68	-0.58		-0.35	0.08	0.86	-0.39	-0.47	1.27	-0.63	-1.47	0.04	-1.07	-2.64	0.76	1.03	-0.65	-0.3		0.08		1.79	1.51	-2.39	-0.72	0.05	-0.73	-0.11	0.17
YGL060W_ORF	|| YBP2 || biological_process || molecular_function || YGL060W || 35% identity with Ybp1p, which is required for the oxidative stress response to peroxides via the the Yap1p transcription factor || 1453552	-2.58	-0.45	0.14	-1.23	-1.1	-0.34	-1.11	1.46		-0.14	1.2	-5.38	-1.52	0.15	-1.38	-1.61	-1.2	-0.65		-1.69	-0.47	-1.02	-1.11	-2.18	-1.67	0.64		-0.12	-1.15	-1.74	1.25	-1.8		-0.58	-2.79	-1.13		1.46	1.07	-0.65	-0.43	-0.05	-1.61	-1.09	-0.48
YJR138W_ORF	|| IML1 || biological_process || molecular_function || YJR138W || Protein of unknown function, green fluorescent protein (GFP)-fusion protein localizes to the vacuolar membrane || 1450253	-0.66	0.27	-1.35	-1.02	-1.14	-1.78	0.13	1.71		-1.92	0.21	-2.81		0.45	-0.78	-0.72	-1.4	-1.14		-1.1	-2.34	-1.04	1.24	-1.18	-1.53	-0.95	0.01	0.85		-2.06		1.23		-1.33		-2.37		1.22	1.79	3.08	6.32	3.15	-1.36	1.07	-1.02
YPR095C_ORF	|| SYT1 || vesicle-mediated transport* || ARF guanyl-nucleotide exchange factor activity || YPR095C || Suppressor of Ypt3 || 1455437	-1.41	0.21		-2.66	-1.95	-0.37	0.44	1.21		-0.11	0.33	-3.65	0.35		-1.21	-0.51	-1.34	-0.8		-1.4	-0.93	-0.7	-1.1	-3.94	-0.91	0.23	-0.9	-1.77	-0.95	-1.67	-0.5		-1.44	-1.3		-2.19		0.93	0.73	-1.7	-0.36	-0.61		-1.86
YOL068C_ORF	|| HST1 || telomere maintenance* || NAD-dependent histone deacetylase activity* || YOL068C || Homolog of SIR2 || 1450514	-1.18	-3.21	-1.23	-0.81	-0.28	-0.48	-0.39			-0.88	-0.76	-1.35	-0.36	0.44	0.48	0.56		-0.48		-0.8	0.45	-0.08	-0.32	0.08	-0.75	-0.26	-0.94	-0.69	0.41	-0.65	0.19	-1.67	0.46	0.5	-3.62	-0.81		1.34	0.54	-0.46	-0.64	-0.32	-0.81	-0.46	-0.15
YFL008W_ORF	|| SMC1 || mitotic sister chromatid segregation* || ATPase activity* || YFL008W || SMC chromosomal ATPase family member || 1455827	-1.78			-0.79	-1.49	-0.18	0.22	-1.54		-0.61	-2.92	-2.53	-1.52	-0.18	-1.81	-0.73	-1.24	-0.44		-1.53	-0.46	-1.19	-0.62	-1.92	0.04	0.11	-1.06	-1.98	-1.43	-2.31	-2.46	-1.33	1.04	-1.69		-2.54		1.5	0.34	-1.17	-1.18	-0.68	-2.9	-1.35	-0.85
YPR126C_ORF	|| || || || YPR126C || Hypothetical ORF || 1456119		-0.93	-1.5	-1.11	-1.86	-0.62				-1.27	0.64			0.83	0.19	-1.24	-0.89	0.49		-0.92	-0.03		0.37		-0.02	-1.06	-2.88	-0.41	-0.4	-0.3	-0.59	-1.13	-0.48	-0.54		-0.96		1.46	0.28	-0.78		0.19		-0.55	-0.46
YDR518W_ORF	|| EUG1 || protein folding || protein disulfide isomerase activity* || YDR518W || protein disulfide isomerase homolog || 1457157	-0.57	-0.72	-0.28	-1.31	-1.62	-1.56	0.37	1.31		-1.19	-1.07		0.28	0.45		-0.99	-4.79	-0.75		-1.67	-0.44	-0.45	-0.64	-0.27	-3.03	0.53	-0.79	-1.07	-0.32	-0.88	-1.19		0.78	-1.35		-1.26		1.67	0.97	0.06	-0.79	-0.12		-1.41	-0.48
YLR129W_ORF	|| DIP2 || ribosome biogenesis and assembly* || snoRNA binding || YLR129W || U3 snoRNP protein || 1455762	-1.82	-0.92		-1.56	-1.66	-1.48	-2.06	0.9		-0.03	-0.91	-2.54	-1.09	-2.59		0.72	-0.16			-1.39	0.51	-0.8	-1.09	-1.33	2.38	-1.12	-2.38	-1.75	-1.49	-1.49	-1.77	-1.1	-0.76	-1.11		-2.73		0.86	0.59	-0.17	-1.09	-0.85	-2.13	-1.28	-0.78
YLR087C_TIL_3001_3300_95_ORF	|| CSF1 || fermentation || molecular_function || YLR087C || YBOX_TIL1000271:TIL_YLR087C_3001_3300_95_0 || 1452496	-1.33		0.14	-0.86	-0.97	-1.72		1.73		-0.32	1.44	-5.85			-1.6	0.05	-0.66	-2.08		-0.84	-1.32				-1.58	-0.22	0.47	-0.54	-0.91	-0.67	-1.76		-0.25	0.16		0.06		1.26	1.66	-0.08	0.96	-1.19	-1.73	-1.77	0.81
YDR477W_ORF	|| SNF1 || protein amino acid phosphorylation* || AMP-activated protein kinase activity || YDR477W || serine/threonine kinase || 1451132	-0.85	-1.42	-0.32	-0.83	-1.64	-1.06	0.34	2.29		-1.89	0.89	-3	1.26	1.14	-0.63	-0.37	-1.04	-0.69		-0.41	-0.24	0.17	-0.83	-0.99	-1.22	0.31	0.48	-0.53	-1.05	-1.3	0.03	-0.33	-1.93	-0.11		-0.77		1.16	1.22	-1.14	0.5	-0.42	-0.86	-0.95	0.11
YLR321C_ORF	|| SFH1 || RNA elongation from RNA polymerase II promoter* || DNA-dependent ATPase activity || YLR321C || Snf5p homolog|chromatin remodeling complex member, RSC || 1454832	-1.09	-1.7	0.86	-1.72	-1.83	-1.02	-0.43	-1.65		-0.31	-0.17		-0.35	0.77	-0.95	-0.09		-0.87		-1.57	-0.67	-0.37	-1.04	-0.28	-1.04	-1.38	-3.31	-1.59	-2.55	-0.9	-1.23	-0.65	-0.87	-0.76		-0.57		1.1	1.09	-0.77	-0.74	-0.25	-0.22	-0.48	-0.2
YNL217W_ORF	|| || biological_process || phosphoric monoester hydrolase activity || YNL217W || Hypothetical ORF || 1458069	0.11	-0.03		0.33	-0.07	0.54	0.4	0.62		1.01	0.67	-0.8	0.14	-0.08	0.41	0.42	0.27	0.34		0.57	1.13	0.36	0.74	0.25	1.49	2.13	0.54	-0.1	1.41	0.6	0.43	0.34	-0.77	0.24	0.1	-0.23		3.5	1.05	-0.01	-0.7	0.05	-0.04	-0.38	0.01
YJR033C_ORF	|| RAV1 || vacuolar acidification* || molecular_function || YJR033C || Regulator of (H+)-ATPase in vacuolar membrane || 1458645	-1.74			-2.38	-1.33	-1.63	1.03	-0.96		0.19	1.52	-2.57	0.67	2.05	-1.25	-0.73	-0.16	-1.76		-1.59	-0.51	-0.22	-0.93	-1.99	-3.05	-1.03	-0.89	-1.47	-0.03	-1.71	-2.55	-0.89	-0.56	-1.24		-0.23		0.12	0.57	3.52	4.34	1.8	-2.22	-0.93	1.62
YPL211W_ORF	|| NIP7 || ribosome biogenesis and assembly* || molecular_function || YPL211W || Nip7p is required for 60S ribosome subunit biogenesis || 1457911	-0.7	-1.35	-2.53	-1.49	-2.26	-0.11	-0.98			-0.01	-0.04		-0.65	-0.98	-0.7	-0.08	0.1	0.42	-3.36	-1.41	0.1	-0.28	-0.47	0.52	2.49	-0.77	-0.81	-0.75	0.27	-0.38	-0.03	-2.52	-0.96	0.74	-0.34	-0.12		0.22	0.77	0.81	-0.43	-0.39	0.1	-0.65	0.5
YPL139C_ORF	|| UME1 || histone deacetylation* || histone deacetylase activity* || YPL139C || transcriptional modulator || 1456975	-1.59			-0.89	-0.77	-0.4	0.15	1.54		-0.14	0.59			-0.47	-1.09	-0.22	-0.49	-0.81		-0.94	-0.95	0.01	-0.51	-2.38	-0.44	0.46	0.14	-2.64	-0.05	-1.06	-0.84	1.04	0.72	-1.2		-0.06		1.57	0.54	-1.71	-0.35	-0.24	-1.89	-1.31	-0.01
YBR094W_ORF	|| PBY1 || biological_process* || molecular_function || YBR094W || Hypothetical ORF || 1451466	-0.95	-0.1	0.55	-1.68	-1.06	-1.69	-0.19	-0.66		-0.77	-0.07	-3.82	0	-2.42	-0.67	-0.91		-0.54		-2.36	-0.9	-0.33	-0.55	-0.69	-2.04	-0.7	-0.3	-0.86	-0.23	-2.03	-0.93	0.12	-0.82	-0.83	-1.02	-0.24		2.03	0.92	-1.05	0.51	-0.05	-1.55	-0.86	-0.22
TAG_PROTEIN-A_MARKER	|| || || || || YBOX_TAG1000012:TAG_2:TAGS_Protein-A:(TAP)_44 || 1453208	0.08	1.44	1.35	0.55	0.78	1.83	0.62	1.32		0.7	1.76	-1.28	-0.27	2.6	0.53	0.48	0.39	0.27	-1.44	1.03	2.54	2.78	2.27	1.47	2.84	2.28	2.04	3.96	4.17	5.16	0.66	0.87	1.48	0.15		0.19	1.72	3.52	3.62	-0.66	-0.14	-0.22	0.04	0.72	0.93
YAL043C_ORF	|| PTA1 || mRNA cleavage* || RNA binding || YAL043C || cleavage factor II (CF II) component|polyadenylation factor I (PF I) || 1456592	-1.16		-0.73	-1.48	-0.86	-0.64	0.71	0.3		-1.81	0.38	-3.5		-1.38	-0.39	-0.55	1.28	-0.8		-1.42	-0.24	-0.25	-0.19	-0.79	-1.97	-1.86	-3.12	0.04	-1.51	-0.72	0			-0.48	-1.25	-1.25		2.1	-0.04	-0.23	-0.4	-0.16	-2.05	-1.34	-0.44
YJR042W_ORF	|| NUP85 || mRNA export from nucleus* || structural molecule activity || YJR042W || nuclear pore complex subunit || 1456287	-0.82	-1.74		-1.09	-0.51	-1.22	-1	-0.74		-0.43	0.36	-2.31	-1.05	0.6	-1.18	-0.07		-0.72		-1.54	-1.22	-1.31	0.53	-1.77	0.86	1.82	-0.93	-0.04	-0.59	-1.36	-0.34	-0.11	1.55	-0.25		-2.43		1.35	0.68	-1.3	-1.04	-0.91	-1.46	-1.38	-0.2
YGR014W_ORF	|| MSB2 || establishment of cell polarity (sensu Fungi)* || osmosensor activity || YGR014W || integral membrane protein (putative) || 1450923	-1.84		-0.38	-2.15	-2.08	-1.51	-0.43	-3.77		-2.45	-2.06	-1.83	-2.26		-1.22	-0.7	-1.24	-1.95		-1.38	-1.21	-1.05	-0.15	-2.87	-2.25	-0.34	-0.59	-1.08	-0.76	-1.41	-0.67	0.4	-1.71	-0.51		-2.19		-0.3	1.12	-2.89	-1.21	-0.91	-1.45	-2.73	0.37
YMR235C_ORF	|| RNA1 || protein import into nucleus* || Ran GTPase activator activity || YMR235C || GTPase activating protein (GAP) for Gsp1p || 1453628	-1.28	-2.87		-2.8	-1.94	-0.48	-2.12	-1.47	-1.43	-0.99	0.29	-2.5	-0.67	-3.06	0.78	-1.01	-1.34	-0.29	-1.01	-1.23	0.12	-1.12	-1.02	0.46	2.68	-0.43	-2.22	-0.06	-1.49	-1.13	-1.39	-0.88	-1.78	-0.95	-0.26	-0.9	0.49	-0.46	-0.65	-0.43	-0.54	-0.51	-0.16	-0.15	-0.19
YHR005C_ORF	|| GPA1 || response to drug* || GTPase activity || YHR005C || G protein alpha subunit|coupled to mating factor receptor || 1454866	-1.65		-0.72	-0.56	-1.15	-0.18	-1.7	0.53		0.11	0.92	-2.18	-0.8	-0.23	-0.61	-0.14	-1.54	-0.38		-0.96	-0.4	-0.81	-0.57	-1.41	0.04	-0.98	-0.97	-0.87	-1.05	-1.1	-2.09	-0.12	-1.07	-0.03	-1.04	-1.37		1.5	0.47	-0.57	-0.81	-0.58	-1.51	-1.66	-1.29
YOL089C_ORF	|| HAL9 || transcription initiation from RNA polymerase II promoter* || specific RNA polymerase II transcription factor activity || YOL089C || contains zinc finger|transcription factor (putative) || 1451745	-2.07	-1.21		-1.38	-1.69	-1.53				-1.29	2.51					-0.12	0.07	-1.18		-1.38	-0.85	0				0.66				-0.62	-1.62		-1.22	-1.32				-0.52	1.35	-2.12		-0.45			0.29
YPL086C_ORF	|| ELP3 || regulation of transcription from RNA polymerase II promoter* || histone acetyltransferase activity || YPL086C || histone acetyltransferase|RNA polymerase II Elongator subunit || 1455970	-1.22		-0.89	-1.3	-2.21	-1.73	1.68	-0.29		-0.55	-2.09	-1.91	-1.38	-0.15	-1.35	0.39	-0.46	-1.64		-0.54	-0.92	-0.53	0.55	-1.22	1.54	1.5	0.27	-0.35	-0.28	-0.93	0.51	-0.66	-1.93	-1.51		-2.58		0.75	0.44	-0.87	-0.79	-0.45	-1.44	-1.06	0.03
YLR180W_ORF	|| SAM1 || methionine metabolic process || methionine adenosyltransferase activity || YLR180W || S-adenosylmethionine synthetase || 1452790	-1.32	-1.51	-0.66	-1.12	-2.1	-0.16	-2.11	-1.03	-4.84	-1.09	-1.11	-0.54	-0.5	-2.06	0.31	-0.4	0.04	-0.27	-3.02	-1.13	-0.22	-0.99	0.59	0.35	-0.69	-1.37	-0.5	-1.05	-1.22	-0.35	-1.2	-0.97	-1.55	0.12	-1.12	-1.19		0.94	0.33	-0.74	-0.98	-0.94	-0.32	-0.61	-0.61
YLR079W_ORF	|| SIC1 || G1/S transition of mitotic cell cycle* || cyclin-dependent protein kinase inhibitor activity || YLR079W || P40 inhibitor of Cdc28p-Clb5 protein kinase complex || 1452120	0.36	-1.95	-2.24	-0.2	-0.47	0.18	-0.55			0.26	0.25		-1.12		0.34	0.18	-0.09	0.01		-0.3	0.68	0.39	-0.35	0.52	1.61	-0.55	0.15	-0.26	-0.39	-0.35	-0.64	1.95	-0.6	-0.21	-0.25	-0.08	0.8	2	0.38	0.52	0.66	0.36	0.54	0	0.01
YNL293W_ORF	|| MSB3 || actin filament organization* || Rab GTPase activator activity || YNL293W || GTPase activating protein (GAP) for Ypt6 || 1452816	-1.21	-1.36	-0.26	-0.21	-0.61	-0.25		0.7		0.36	0.7	-2.27	-0.03	0.72	0.14	0.37	0.48	-0.09		0.3	0.05	-0.32	0.55	-0.31	0.77	1.96	1.09	0.31	-0.06	-0.16	-0.44	0.28	1.11	-0.08		0.03		1.24	1.14	-0.35	-0.28	0.26	-0.75	-0.24	0.61
YNR023W_ORF	|| SNF12 || chromatin remodeling || general RNA polymerase II transcription factor activity || YNR023W || RSC chromatin remodeling complex Rsc6p subunit homolog|SWI/SNF transcription activation complex 73 kDa subunit || 1450975	-0.99		-1.22	-0.74	-0.4	-0.25	-0.38	1.76		0.39	-0.15	-2.82	0.07	0.54	-0.86	-0.48	-0.34	-0.05		-0.61	-0.06	-0.34	-0.4	-0.77	-1.56	-1.18	-1.51	-2.75	-0.65	-0.97	-1.36	0.73	0.74	-0.29		-1.19		0.8	1.35		-0.63	-0.06	-1.32	-0.52	-1.46
YGR102C_ORF	|| || biological_process || molecular_function || YGR102C || Hypothetical ORF || 1451986	0.16	-0.85	-0.61	0.35	0.02	0.18	-1.02	1.33	-2.12	-0.49	0.45	-1.8		2.57	-0.1	0.1	-0.91	-0.09		0.47	0.28	0.53	-0.67	0.75	0.72	0.56	0.5	0.48	0.33	0.17	0.14	0.01	-0.4	0.09	1.63	0.33	0.78	2.58	1.69	0.88	0.33	0.43	0.79	0.14	0.37
YAL035W_ORF	|| FUN12 || translational initiation || GTPase activity* || YAL035W || 97 kDa protein || 1458042	-2.05	-2.45	-1.19	-2.13	-2	-1.04	-1.31	-1.22		-2.08	-0.92	-1.09	-1.49	-0.96	-1.35	-1.11	0.13	-1.38		-2.37	-1.27	-1.46	-0.23	-1.38	2.01	-1.57	-2.59	-2.32	-1.66	-2.04	-2.05	-1.1	-1.41	-1.1	-1.89	-2.65		0.55	-0.74	-1.6	-1.66	-1.61	-1.87	-1.73	-2.14
YDR486C_ORF	|| VPS60 || response to drug* || molecular_function || YDR486C || vacuolar protein sorting (putative) || 1457381	-0.31	-2.21	-1.05	-0.69	-1.2	-0.79		-0.69	-0.33	-0.14	-1.62	-1.25	-1	0.98	0.14	-1.07	-0.72	-0.6		-0.71	-0.56		-0.34	0.76	-1.26	1.26	-1.35	-0.59	-0.44	-0.83	-0.86	0.21	-1.04	-0.29		-0.28	0.7	0.6	0.92	-0.19	0.26	0.18	0.58	-0.71	0.44
YPL159C_ORF	|| PET20 || aerobic respiration || molecular_function || YPL159C || Protein required for respiratory growth and stability of the mitochondrial genome || 1450473	-0.37	0.52	-1.32	0.17	0.36	0.8	0.7	0.98		-0.2	-0.3		-0.7	-0.11	0.28	-0.05	0.26	0.48	-3.87	-0.13	0.84	0.43	0.4	1.2	-0.19	0.21	-0.19	0.24	-0.28	0.22	-0.58	0.72	0.65	1.42		0.25	1.41	1.96	1.68	0.49	0.26	-0.31	0.52	0.72	0.87
YKL080W_ORF	|| VMA5 || vacuolar acidification || hydrogen ion transporting ATPase activity, rotational mechanism || YKL080W || V1 sector hydrophilic subunit C|vacuolar ATPase V1 domain subunit C (42 kDa)|vacuolar H-ATPase || 1453336	-1.19		-1.67	-1.6	-1.35	-0.38	0.33	-1.22	-2.56	-1.42	-1.56	-1.7	-0.61	-1.69	0.76	-2.11	0.46	-0.25	-2.1	-1.5	0.3	-0.85	-1.02	0.47	-2.37	-1.22	-1.47	-0.99	-1.59	-1.18	-1.84	-4.4	-0.88	0.4	-1.04	-0.76	0.19	1.27	-0.49	-0.48	0.05	-0.2	-0.19	-0.22	-0.56
YMR162C_ORF	|| DNF3 || intracellular protein transport* || phospholipid-translocating ATPase activity* || YMR162C || Potential aminophospholipid translocase || 1450509	-1.4		-1.42	-2.21	-1.38	-0.36	0.28			-2.2	0.7	-1.62	0.78	-2.34	-1.22	-1.05	-0.62	-1.57		-1.99	-1.36	-0.37	-0.85	-4.57	-2.26	-1.18	-1.35	0.3	-0.66	-1.21	-2.37	-2.03	0.4	-1.52	-4.43	-2.28		-0.05	0.39	-0.77	-0.69	-0.68	-1.64	-1.4	-1.97
YDR430C_ORF	|| CYM1 || proteolysis || metalloendopeptidase activity || YDR430C || Metalloprotease || 1453087	-1.62	-1.14	-2.22	-1.52	-1.68	-1.11	0.73	-0.8	-0.78	-2.62	-1.44	-2.35	0.31	-0.53	-1.25	-1.1		-0.57		-1.61	-0.56	-0.68	-0.77	-0.76	-1.64	-0.95	-1.46	-1.76	-1.17	-1.39	-0.4	-0.59	-1.24	-0.15	-2.08	-2.41	-1.12	1.07	0.41	-1.46	-0.59	0.6		-0.7	-1.46
YOR164C_ORF	|| || biological_process || molecular_function || YOR164C || Hypothetical ORF || 1451914	-0.88	-2.63	-2.09	-2.18	-2.11	0.32	-1.98	-0.77		-0.42	-1.95	-0.84	-1.05	-0.68	0.15	-1.3	-1.98	-0.3		-1.65	-0.54	-1.14	-0.58	0.12	-0.2	-1.01	-1.5	-1.08	-1.35	-0.86	-1.48	-0.4	-1.91	-0.54		-2.1	0.29	-1.39	0.43	-0.65	-0.78	-0.47	-0.32	0.67	-0.56
YKL145W_ORF	|| RPT1 || ubiquitin-dependent protein catabolic process || ATPase activity* || YKL145W || 26S protease subunit component (putative)|ATPase || 1457961	-1.46	-2.52	-2.44	-1.69	-1.62	-0.88	-0.43	-3.07	-2.06	-0.48	-0.87	-1.7	-1.74	-1.52	-0.21	0.1	-1.41	-0.89	-1.52	-1.47	-0.2	-1.16	-1.04	-0.36	0.31	-0.85	-1.5	-1.71	-1.44	-1.36	-1.01	0.14	-1.78	-1.21		-1.14	-0.23	-0.24	-0.16	-1.34	-1.26	-1.01	-0.67	-1.16	0.08
YAL007C_ORF	|| ERP2 || ER to Golgi vesicle-mediated transport || molecular_function || YAL007C || p24 protein involved in membrane trafficking || 1457459	-0.23	-0.12	0.15	-0.81	-1.35	0.21	-0.27	-0.59	0.09	-0.52	-0.33	-0.77	-0.14	-0.51	0.95	-0.36	0.39	0.12	-1.08	-0.32	0.25	-0.04	-0.47	0.4	0.3	-0.03	-0.39	-0.09	-0.26	-0.02	-0.56	-0.83	-0.86	-0.16	-0.73	-0.59	1.62	0.79	1.32	-0.21	-0.03	0.32	0.36	0	0.08
YPR180W_ORF	|| AOS1 || protein sumoylation || SUMO activating enzyme activity || YPR180W || Nuclear protein that acts as a heterodimer with Uba2p to activate Smt3p (SUMO) before its conjugation to proteins (sumoylation), which may play a role in protein targeting; essential for viability || 1450483	-1.91	-2.71	-1.71	-1.83	-1.52	-0.59	-1.54			-0.35	-0.31	-2.57	-2.24	-2.51	-0.96	-1.77	-1.46	-1.36		-1.5	-0.77	-0.83	-0.57	-0.41	0.39	-1.14	-1.25	-1.45	-0.25	-0.81	-1.73	0.77	-1.93	-1.96		-1.4	-0.94	1.35	-1.12	-0.66	-0.76	-0.53	-0.6	-0.64	-1.45
YOR185C_ORF	|| GSP2 || nuclear organization and biogenesis || GTPase activity || YOR185C || GTP-binding protein|Gsp1p homolog || 1453115	-1.04	-2.31	-1.76	-1.57	-1.74	-0.23	-2.02	-2.14	-1.22	-0.97	-1.61	-0.32	-0.75	-2.15	0.35	-0.91	-1.56	0.11	-0.37	-1.33	0	-0.9	-0.66	0.62	-1.83	-1.54	-1.46	-1.17	-1.3	-0.55	-1.26	-1.6	-0.91	0.67	-0.46	-0.35	0.67	-0.7	-0.26	-0.12	-0.35	-0.56	0.22	-0.18	-0.57
YLR262C_ORF	|| YPT6 || retrograde transport, endosome to Golgi* || GTPase activity || YLR262C || similar to the human GTPase, Rab6 || 1453550	-0.96	-1.23	-1.32	-1.25	-1.45	-0.24	-0.1	-1.73	-0.89	-0.96	-1.12	-3.73	0.28		-0.05	-1.51	-1.3	-0.99	-1.4	-0.71	-1.05	-0.82	0.03	0.05	0.67	-1.88	-2.62	-2.17	-1.23	-0.31	-0.75	-0.42	0.69	-0.74		-1.21	0.47	0.69	-0.18	-0.52	-0.67	-0.32	0.14	-0.86	-0.21
YDR226W_ORF	|| ADK1 || nucleotide metabolic process* || adenylate kinase activity || YDR226W || adenylate kinase || 1450416	-0.96	-1.57	-1.59	-1.26	-1.5	0.14	-1.4	-1.23	-0.99	-0.57	-1.63	-0.49	-1.04	-1.66	-0.01	-0.3		0.32	-0.92	-0.94	0.35	-0.92	-0.83	0.53	-1.2	-1.45	-1.22	-1.18	-0.74	-0.53	-1.5	-0.78	-0.8	0.83	-0.23	-0.29	0.15	0.59	-0.3	-0.87	-0.37	-0.3	0.11	-0.05	0.13
YLR264C-A_ONO_ORF	|| || biological_process || molecular_function || YLR264C-A || YBOX_ONO1000078:YLR264C-A_YLR264C-A_SGDID:S0028808_Chr_XII_673946-673830_RC_Unc_ORF_4 || 1457224	0.86	1.32	1.85		2.63			2.9		2.71	3.69	1.45		3.26	-0.57	1.79		1.35		2.08			0.99		4.49		3.82	1.38	1.76	2.08	2.98	1.67	2.16	3.08		1.67		0.82	1.91	2.04	2.54	1.22		2.26	1.07
YAR064W_OCH_DS100_ORF	|| || biological_process || molecular_function || YAR064W || YBOX_OCH1000122:DS100_YAR064W_YAR064W_Chr01_(220489..220588)_100_bp._0_0 || 1453414	-4.08	1.04	2.46	0.16	1.83	0.72	0.58	3.33		-0.27	1.37	-2.96		0.38	-0.95	0.7	1.59	0.55		-0.2	0.96	0.2	0.12		3.53		1.93	-0.2	-0.66	-0.83	1.02	0.18		1.36		-1.1		-1.72	0.59	0.11	-0.21	-0.05	0.04	0.53	-1.19
IGR_CHR05:(426683..427683)_390	|| || || || || YBOX_IGR1000160:gER03_1:gER03_1:chr05.fsa:(426683..427683):1001:bp._390_0 || 1450993		-1.11		1.98	1.36	0.16				1.6	1.03	-2.92	-0.25	-0.7	-1.55	-0.3		0.93		1.23	0.73		0.54			3.93	2.19	0.66	0.31	-0.43		1.48		1.05		2.15			1.25			1.03	-0.09	0.07	-0.81
IGR_CHR15:(33182..33335)_12	|| || || || || YBOX_IGR1000123:NOL046W:NOL046W:chr15.fsa:(33182..33335):154:bp._12_0 || 1454468	-0.03	0.72		-0.51	-0.72	-0.82	1.21	2.43		-2.62	0.01		0.56	0.87	0.31		1.54	-0.5		-0.69		0.44	0.97		3.14	0.78		-0.82	0.23	-0.77	-2.33	0.19	1.35	-0.87		-2.33		0.5	-0.24	0.07	-0.38	-0.15	-1.61	-0.66	-0.32
YNL254C_ORF	|| || biological_process || molecular_function || YNL254C || Hypothetical ORF || 1456369	-1.16	-0.14	-0.85	-1.64	0.79	0.12	0.42	-0.04		0.48	-0.22			-3.28	-1.37	-0.81	1.36	0.16		0.72		0.71			1.74	1.14		0.79	-1.05		0.1		1.06	-0.65		-2.33		0.32	0.84	-1.42	-0.04	-0.13	-0.85		-0.36
YBR005W_ORF	|| RCR1 || cell wall organization and biogenesis* || molecular_function || YBR005W || Hypothetical ORF || 1454014	0.05	-2.9	-1.19	0.56	-0.68	1.07	1.91			-0.56	-3.44	0.03	-1.07	-0.85	-0.28	-1.09	-0.36	0.07		1.71	1.12	0.53	0.09	1.04	1.83	0.78	1.1	0.54	1.7	0.76	-0.7	0.12	-0.49	0.33	-1.1	-1.39	-3.03	-0.06	0.9	0.12	0.51	0.53	1.07	0.11	-0.01
YKL201C_ORF	|| MNN4 || response to stress* || molecular_function || YKL201C || Required for the transfer of mannosylphosphate to cell wall mannans. || 1453277	-1.57	-2.72	-2.46	-2.49	-2.55	-1.16		-0.94		-1.3	-1	-1.66	-2.4	-2.42	-0.93	-1.38	-6.28	-1.16	-0.54	-1.46	-0.74	-0.27	-1.78	0.12	2.23	-2.04	-1.78	-2.46	-1.41	-2.04	-1.58	-4.61	-2.79	-1.2	-2.07	-1.82	0.01	-2.48	-1.73	-1.77	0.67	-0.41	-0.84	-1.11	-1.22
YLR017W_ORF	|| MEU1 || glutamate biosynthetic process* || S-methyl-5-thioadenosine phosphorylase activity || YLR017W || Protein that regulates ADH2 gene expression || 1456175	-0.93	0.73	-1.06	-0.7	-0.97	0.59	-0.22	0.83		0.1	-0.99			-0.6	0.9	0.3	0.06	0.15		-0.15	0.21	-0.6	-0.99	0.67	1.14	1.79	1.9	-0.7	-0.67	-0.28	-0.71	0.2	-0.48	-0.21		-0.46		1.4	0.48	-0.16	-0.09	-0.33	-0.33	-0.17	0.06
YER030W_ORF	|| CHZ1 || chromatin remodeling || histone binding || YER030W || Hypothetical ORF || 1453387	-0.87	-1.26	-2.66	-1.79	-2.52	-1.22	-0.46	-1.04	-0.27	-0.66	-1.89	-1.56	0.05	-2.28	-0.61	-1.96	-1.2	-1.19	-0.26	-1.3	-1.18	-0.07	-0.49	-0.15	2.13	-1.02	-0.59	-1.79	-1.47	-1.54	-1.4	-2.11	-2.06	-1.66	1.18	-1.8	0.61	-2.23	-1.43	-1.18	0.09	-0.45	0.61	-0.53	-0.85
YIL060W_ORF	|| || biological_process || molecular_function || YIL060W || Hypothetical ORF || 1456710	0.89	0.38	-0.79		2.14					1.36	2.89	-2.36	1.4	3.23	-1.19	-0.3		0.21		1.07		0.89	0.3		2.57	2.48		0.66	0.81	0.22	1.89	1.43		0.06		1.57		-0.5	0.74			0.93	-3.2
YPR142C_ORF	|| || || || YPR142C || Protein required for cell viability || 1453124		0.73		-0.54	-2.13	0.33		2.26		-0.71	1.29				-0.06	0.43	0.18	1.51		-0.27	1.02		0.36			1.4	1.02	0.3	-0.19	-0.28	2.07	-1.47	0.13	1.24		0.57			0.35				1.2	0.18	1.4
YNL038W_INT_1	|| GPI15 || GPI anchor biosynthetic process || UDP-glycosyltransferase activity || YNL038W || YBOX_INT1000027:INT_1_YNL038W:NC_001146:557610..557683 || 1453413	-0.53			0.09	1.4		1.25	2.08		0.58	2.29	-3.37	-0.77	2.62		-2.1	0.84			0.07		1.38	0.25		2.64		1.59	-0.65	0.28	-0.84	0.1	1.56			-1.61	-0.98		2.19	0.9	0.29	0.66	0.46	-0.22
YBL071C_ORF	|| || || || YBL071C || Hypothetical ORF || 1450178	0.97	0.5		1.2	1.5	1.76				1.2	2.27	-1.27			-4.07	0.33		1.82		1.34	1.87	1.95	1.04		3.18	2.31		0.82	1.11	-0.66	2	0.61	1.59	0.84		0.34		2.55	1.09	0.74		1.05	-0.1	1.68	0.34
YJL012C_ORF	|| VTC4 || vacuole fusion, non-autophagic || molecular_function || YJL012C || polyphosphate synthetase (putative) || 1455571	-1.86	-2.67	-1.39	-1.66	-1.41	-1.33	-1.39	-1.09		-1.46	-1.33	-0.97	-0.92	-2.65	-1.03	-1		-1.09		-0.92	-0.47	-0.8	-0.78	-0.56	0.04	-1.07	0.81	-1.48	-1.33	-0.98	-0.73	-0.7	-1.48	-0.04		-1.33	-1.65	0	-0.93	-1.25	-1.27	-0.9	-1.17	-1.08	-0.22
YMR205C_ORF	|| PFK2 || glycolysis || 6-phosphofructokinase activity || YMR205C || phosphofructokinase beta subunit || 1454772	-1.15	-2.35	-2.16	-1.23	-1.61	-1.21	-2.95	-1.97	-1.59	-1.86	-2.24	-0.94	-1.42	-2.73	-1.07	-1.19	-1.27	-0.45	-2.6	-1.53	-0.33	-1.98	-0.94	-0.95	-3.14	-2.03	-1.8	0.57	1.33	2.71	-1.68	-1.65	-1.68	-1.32	-1.82	-1.62	-2.67	-1.65	-1.53	-1.89	-1.62	-1.89	-1.73	-0.17	-1.63
IGR_CHR13:(COMPLEMENT(671527..671701))_71	|| || || || || YBOX_IGR1000108:NMR054C:NMR054C:chr13.fsa:(complement(671527..671701)):175:bp._71_0 || 1458274	-0.98	-0.47	-1.18	-1.83	-1.99	-1.32	-1.82	-1.02	-4.85	-1.88	-0.1	-2.28	-1.22	-0.49	-1.79	-1.53	-0.75	-1.49		-0.38	-1.89	-1.62	-1.61	-1.53	-3.49	-0.17	-0.95	1.4		1.48	-2.12	-0.98	-0.99	-1.74	-2.49	-2.25	-2.04	-1.55	-0.03	0.07	-2.01	-2.07	-1.26	-2.27	-1.68
YMR217W_ORF	|| GUA1 || GMP metabolic process || GMP synthase (glutamine-hydrolyzing) activity || YMR217W || GMP synthase || 1458356	-1.55	-2.2	-1.03	-1.38	-1.21	-1.36	-2.63	-1.25	-2.15	-1.13	-1.54	-0.91	-1.19	-1.07	0.16	-0.01	-1.18	-0.66	-1.16	-1.54	-0.19	-1	-0.92	-0.1	-0.51	-1.58	-1.26	0.46	1.01	0.81	-1.19	-0.91	-0.38	-1.05	-1.62	-0.57		-0.62	-0.94	-0.97	-1.21	-1.38		-0.99	-0.66
YDL125C_JXN_IE_1_ORF	|| HNT1 || nucleotide metabolic process || hydrolase activity* || YDL125C || YBOX_JXN1000028:JXN_IE_1_YDL125C:NC_001136:complement(239359..239438) || 1452234	0.45	-1.73	-0.02	-0.79	-1.34	0.96	-0.94	1.2	-3.32	0.83	-0.39		-0.24	0.3	0.2	1.18	1.18	0.33	-1.03	-0.21	-0.08	-0.14	-0.88	0.02	-0.29	-0.29	-0.25	1.48	1.13	1.18	-1.02	0.33	0.05	1.01	0.08	0.44	-0.9	0.51	0.5	0.51	-0.45	-0.28	0.58	1.77	0.67
YKL218C_ORF	|| SRY1 || amino acid derivative catabolic process || threo-3-hydroxyaspartate ammonia-lyase activity* || YKL218C || Pyridoxal-5'phosphate-dependent enzyme homologous to mouse glial serine racemase || 1452479	-2.82	0.61		-0.1	-1.03	-0.21	2.16	-0.09		-0.16	0.6				0.71	0.27	0.17			0.37	0.44	0.11	0.47	-0.21	0.48	0.72	-2.26	0.09	1.66	-0.6	1.72	2.25	1.45	-0.16			-3.55	0.74	1.56	0.1	0.3	0.95	-0.45	-0.38	0.56
YPL060W_ORF	|| LPE10 || mitochondrial magnesium ion transport || magnesium ion transporter activity || YPL060W || mitochondrial protein with homology to MRS2 || 1450522	-0.04		0.69		0.81	0.58		2.09		1.63	2.98	-1.68	-0.14	1.81		0.2		0.68		1.01	-0.53	0.73	0.46		0.35	3.29		-0.37	-0.47	-0.41	3.34	2.52	2.83	1.02		0.21		0.44	1.04	0.59	-1.01	0.39	1.21	-0.86	0.07
YLR154W-A_ORF	|| || || || YLR154W-A || mitochondrial protein of unknown function || 1451021	1.74	1.35	1.23			1.49	3.36	2.95	1.16	3.2	3.41	1.94		-0.49	1	1.99	1.54	2.21		3.12	0.63		0.88	2.95	1.45	2.29	4.08	1.01	1.1	2.15	4.16	2.86	3.76	0.7	3.45	3.93	3.58	3.1	1.79			2.34	3.46	1.42	2.52
YOR312C_OCH_DS100_ORF	|| RPL20B || translation* || structural constituent of ribosome || YOR312C || YBOX_OCH1000180:DS100_YOR312C_YOR312C_Chr15_(complement(900145..900244))_100_bp._27_0 || 1452239	-0.18	-1.5	-3.4	-1.22	-1.02	-0.25	-1.89	-1.77	0	-0.08	-0.39	-0.4	-1.07	-1.61	0.7	-1.18	-0.96	0.18	0.14	-1.18	0.26	-0.31	-0.3	0.29	-1.88	-0.84	-1.08	-1.23	-1.86	-0.74	-0.88	-1.3	-0.83	1.22	0.59	1.14	-2.38	-2.52	0.45	-0.19	0.12	-1.15	0.66	-0.03	1.54
YBL027W_ORF	|| RPL19B || translation || structural constituent of ribosome || YBL027W || ribosomal protein L19B (YL14) (L23B) (rpl5L) || 1452504	0.26	-0.62	-1.3	-1.06	-1.39	0.37	-1.85	-0.86	0.45	0.61	-0.37	1.44	-0.57	-1.41	0.88	0.81	-0.61	0.58	0.8	0.05	0.41	-0.25	0.8	1.23	2.11	-0.57	0.36	-0.15	-0.45	0.49	-0.62	-0.22	-0.55	1.39	1.22	0.85	0.38	-0.52	0.23	0.26	-0.03	0.17	1.41	0.68	0.36
YER074W_OCH_DS100_ORF	|| RPS24A || translation || structural constituent of ribosome || YER074W || YBOX_OCH1000140:DS100_YER074W_YER074W_Chr05_(307193..307292)_100_bp._25_0 || 1451146	0.14	-1.72	-1.77	-0.83	-1.02	0.07	-1.64	-1.31	0.49	0.54	-1.58	0.26	-0.4	-1.5	0.13	-0.55	-1.46	0.15	0.56	-0.96	0.45	-0.27	-0.18	0.38	0.26	-0.56		-0.76	-1.65	-0.02	-0.82	-1.03	-0.8	0.85	0.94	0.69	-1.57	-1.89	-0.24	-0.67	0.66	-0.64	0.83	0.27	0.33
YDR155C_OCH__ORF	|| CPR1 || sporulation (sensu Fungi)* || peptidyl-prolyl cis-trans isomerase activity || YDR155C || YBOX_OCH1000203:YDR155C_CPR1_SGDID:S0002562_Chr_IV_768995-768507_RC_Ver_ORF_193_0 || 1451731	-0.4	-1.17	-1.78	-1.36	-1.3	0.34	-1.79	-0.8	-0.14	-0.09	-1.12	0.72	-0.88	-1.65	0.17	-0.43	-0.83	0.48	0.34	-0.32	0.65	-0.38	-0.58	1.06	-1.74	-0.68	-0.49	-0.37	-0.37	0.25	-1.3	-0.78	-0.73	0.72	1.01	0.18	0.51	-0.34	-0.34	0.25	0.24	-0.04	0.69	0.74	0.02
YJL191W_OCH__ORF	|| RPS14B || translation* || structural constituent of ribosome* || YJL191W || YBOX_OCH1000076:YJL191W_RPS14B_SGDID:S0003727_Chr_X_73786-73795,74204-74610_intron_removed_Ver_ORF_31_0 || 1458527	0.42	-0.84	-1.25	-0.55	-0.97	-0.02	-0.71	-0.97	0.82	1.25	0.55	0.95	-0.35	-0.56	0.16	1.17	-0.61	1.84	0.83	0.62	0.04	0.62	1.44	1.03	1.83	-0.56	0.1	0.24	-0.49	0.42	0.43	0.01	-0.35	1.65	1.36	0.43		0.74	1.14	0.31	-0.21	0.11	1.25	0.32	0.63
YJL177W_OCH__ORF	|| RPL17B || translation || structural constituent of ribosome || YJL177W || YBOX_OCH1000074:YJL177W_RPL17B_SGDID:S0003713_Chr_X_90784-91092,91410-91655_intron_removed_Ver_ORF_293_0 || 1454809	0.54	-0.76	-1.28	-0.39	-0.8	1.34	-1.41	-0.47	0.72	1.02	-0.69	0.89	-0.55	-1.1	0.26	0.08	0.45	1.68	0.44	-0.1	1.31	-0.31	0.84	0.61	-0.09	0.53	-0.14	-0.18	0.02	0.57	-0.49	-0.48	-0.47	1.35	1.4	0.96	-2.63	-0.55	0.14	0.55	0.26	-0.18	0.82	0.32	0.38
YKL056C_ORF	|| TMA19 || translation* || molecular_function || YKL056C || Hypothetical ORF || 1457821	0.03	-1.31	-1.21	-0.41	-0.9	0.26	-1.53	-0.95	0.46	0.6	-0.65	2.25	-0.88	-0.96	0.79	-0.23	-0.21	0.34	0.51	0.06	0.81	-0.23	0.8	0.75	1.64	0.51	-0.39	-0.64	0.09	0.18	-0.95	-0.99	-1.01	1.21	1.11	0.71	-0.52	-1.03	-0.62	0.13	-0.15	-0.23	0.71	0.27	0.44
YMR242C_ORF	|| RPL20A || translation || structural constituent of ribosome || YMR242C || ribosomal protein L20A (L18A) || 1453015	0.32	-0.98	-1.62	-0.91	-1.26	0.18	-1.89	-1.33	0.82	0.51	-0.67	0.93	-0.33	-1.61	0.98	-0.22	-1.02	0.71	0.59	-0.45	0.32	-0.28	-0.04	0.71	-1.27	-0.8	-0.56	-0.28	-1.11	0.13	-1.02	-0.85	-0.96	1.05	1	0.58	-1.18	-0.65	-0.43	0.26	0.49	-0.08	1.08	0.48	1.02
YMR143W_OCH_DS100_ORF	|| RPS16A || translation* || structural constituent of ribosome || YMR143W || YBOX_OCH1000169:DS100_YMR143W_YMR143W_Chr13_(552903..553002)_100_bp._20_0 || 1452338	0.28	-1.18	-1.57	-0.5	-0.51	0.43	-1.55	-0.87	0.96	0.56	-0.88	0.5	-0.69	-1.11	0.62	-0.29	-0.6	0.44	0.86	-0.16	0.97	-0.02	0.07	0.54	-0.31	-0.38	-0.52	-0.41	-1.23	0.06	-0.31	-0.74	-1.14	0.54	1.52	1.12	-1	-0.38	-0.26	-0.25	0.37	-0.21	0.68	0.53	0.62
YMR242C_OCH__ORF	|| RPL20A || translation || structural constituent of ribosome || YMR242C || YBOX_OCH1000101:YMR242C_RPL20A_SGDID:S0004855_Chr_XIII_754196-754178,753741-753224_RC_intron_removed_Ver_ORF_5_0 || 1452471	0.56	-1.2	-1.92	-1.12	-1.83	-0.02	-1.77	-1.45	0.8	0.31	-0.56	0.18	-0.75	-1.33	0.92	-0.62	-0.98	1.17	0.48	-0.34	0.6	-0.24	-0.74	0.09	-1.35	-1.02	-0.69	-0.48	-1.44	-0.19	-0.71	-0.35	-1.53	0.52	0.96	0.47	-0.93	-1.27	-1.98	0.08	-0.31	-0.14	0.73	-0.28	0.52
YNL069C_ORF	|| RPL16B || translation || structural constituent of ribosome* || YNL069C || ribosomal protein L16B (L21B) (rp23) (YL15) || 1456675	-0.04	-1.26	-1.42	-0.88	-1.84	0.38	-2.15	-1.34	0.07	0.07	-0.9	0.39	-0.52	-1.82	0.61	-0.24	-1	0.43	0.5	-0.87	0.02	-0.31	0.01	0.76	1.39	-1.28	-0.79	-0.49	-1.26	-0.3	-0.9	-1.01	-0.9	1.1	0.34	0.19	-0.77	-0.66	-0.94	0.36	0.24	-0.14	0.82	0.32	0.02
YIL133C_OCH__ORF	|| RPL16A || translation || structural constituent of ribosome* || YIL133C || YBOX_OCH1000066:YIL133C_RPL16A_SGDID:S0001395_Chr_IX_99416-99386,99095-98527_RC_intron_removed_Ver_ORF_46_0 || 1457708	-0.58	-1.95	-1.83	-2.01	-1.44	0.16	-1.16	-2.01	0.39	-0.26	-1.05	0.4	-1.53	-2.28	-0.12	-1.1	-1.22	-0.02	0.36	-0.6	0.18	-0.09	-0.66	0.6	1.49	-1.43	-0.93	-1.12	-0.94	-0.73	-0.98	-1.43	-1.88	-0.4	0.37	0.18		-1.29	-1.44	-0.37	0	-0.26	0.71	0.38	-0.24
YPL090C_ORF	|| RPS6A || translation || structural constituent of ribosome || YPL090C || ribosomal protein S6A (S10A) (rp9) (YS4) || 1457990	-0.26	-1.3	-1.71	-0.86	-0.93	0.33	-2.22	-1.37	0.26	0.06	-0.9	0.43	-0.99	-1.68	0.93	-0.34	0.1	0.46	0.07	-0.02	0.7	-0.92	-0.28	1.02	2.64	-0.93	-0.3	-0.48	-0.77	0.12	-0.91	-0.44	-1.11	0.53	0.64	0.58	-0.05	-1.12	-0.89	-0.1	0.4	-0.4	0.56	0.06	0.23
YDL213C_ORF	|| NOP6 || rRNA processing* || RNA binding || YDL213C || Protein with similarity to hydrophilins, which are involved in the adaptive response to hyperosmotic conditions; computational analysis of large-scale protein-protein interaction data suggests a possible role in rRNA processing || 1454484	-1.02	-2.69	-1.58	-0.9	-0.64	0.29	0.37	0.21	-2.5	-0.01	-0.56	-1.64	-1.2	-0.57	-0.77	-1.08	-1.31	0		-1.52	0.09	-0.45	-0.14	0.92	2.71	-0.41	-1.54	-1.3	-0.61	-0.4	-0.47	-0.31	-0.88	0.64	0.06	-0.08		-0.88	0.45	-1.18	0.45	-0.02	0.61	-0.24	0.56
YMR142C_ORF	|| RPL13B || translation* || structural constituent of ribosome || YMR142C || ribosomal protein L13B || 1457013	-0.34	-1.48	-2.5	-1.34	-2.07	-0.25	-1.76	-1.22	0.64	-0.69	-1	0.52	-1.3	-1.69	0.08	-0.87	-0.32	0.09	0.15	-0.3	0.3	0.03	-1.18	0.73	1.27	-1.44	-0.88	-0.69	-1.23	-0.1	-1.48	-0.98	-0.62	-0.42	0.91	-0.44	0.1	-0.2	-1.42	-0.54	0.77	-0.66	0.76	0.51	-0.46
YLR175W_ORF	|| CBF5 || ribosome biogenesis and assembly* || pseudouridylate synthase activity || YLR175W || major low affinity 55 kDa centromere/microtubule binding protein || 1451631	-1.64	-2.35	-1.56	-1.75	-1.96	-0.9	-1.76	-3.26	-2.6	-0.71	-1.53	-1.06	-1.44	-2.25	-0.76	-0.67	-1.25	-0.32	-1.76	-1.65	-0.35	-1.34	-1.17	0.03	2.36	-2.02	-1.79	-1.7	-0.9	-1.21	-1.41	-1.36	-1.12	-0.11	-0.81	-0.05	-1.26	-1.35	-1.55	-1.59	-0.22	-1.27	-0.64	-0.71	-0.66
YBL072C_OCH_DS100_ORF	|| RPS8A || translation || structural constituent of ribosome || YBL072C || YBOX_OCH1000217:DS100_YBL072C_YBL072C_Chr02_(complement(88421..88520))_100_bp._7_0 || 1450598	-0.23	-1.39	-1.47	-0.59	-1.17	1.69	-1.94	-0.92	0.95	0.36	-0.52	0.38	0.69	-1.68	-0.25	-0.84	-0.19	1	-0.36	-0.7	0.51	-0.49	-0.2	0.12	0.81	-1.16	-0.1	-0.43	-1.08	0.63	-0.69	-0.95	-0.39	0.23	0.91	0.45	-0.97	-0.82	-0.06	-0.62	0.54	-0.76	0.26	0.57	0.19
YLR293C_ORF	|| GSP1 || rRNA processing* || GTPase activity || YLR293C || GTP-binding protein || 1451522	-0.94	-2.18	-3.39	-1.67	-1.82	-0.24	-2.81	-2.04	-1.15	-1.15	-1.84	-0.65	-1.95	-1.92	0.53	-1.19	-1.56	0.07	-1.19	-1.33	0.2	-1.12	-1.19	0.74	-1.72	-1.7	-1.42	-1.23	-1.31	-1.05	-1.57	-1.65	-2.08	-0.32	-1.31	-0.62	0.29	-0.74	-1.87	-0.57	-0.26	-0.33	0.37	-0.04	0.57
YOR332W_ORF	|| VMA4 || vacuolar acidification || hydrogen ion transporting ATPase activity, rotational mechanism || YOR332W || E subunit of V1 sector|vacuolar H(+) ATPase 27 kDa subunit || 1455425	-0.72	-1.19	-0.73	0.03	-0.24	0.18	-2.34	-0.23	0.68	0.08	-0.11		-0.52	-0.66	0.29	-0.42	-1.03	0.21		-0.17	0.39	-1.02	0.57	0.79	0.81	-0.14	-0.65	-0.57	-0.1	0.42	-0.87	-0.57	-0.17	0.19	1.81	-0.12		-3.47	0.12	0.22	-0.09	-0.6	1.02	1.92	1.97
YPL161C_ORF	|| BEM4 || telomere maintenance* || molecular_function || YPL161C || Involved in polarity establishment and bud emergence; interacts with the Rho1p small GTP-binding protein || 1454281	-0.34	-0.5		-3.35	-1.46	-1.2	0.47	1.83		-2.12	0.72	-2.1				-0.61	-2.64	-0.68		0.35	-0.63	-0.44		-3.34	-0.52	0.74	1.74	0.11	-1.94	-3.09	0.73	1.02	-0.71			-0.34			1.61	0.55	-1.3	-0.3	0.96	-0.28	0.93
YMR260C_ORF	|| TIF11 || translational initiation || translation initiation factor activity || YMR260C || translation initiation factor eIF1A || 1456894	0.04	-1.59	-1	-1.31	-1.95	0.87	-1.53	-1.57	-0.03	0.41	-1.06	-0.42	-1.23	-1.57	0.81	-0.76	-1.96	0.11	0.58	-0.26	0.55	-0.34	-0.32	0.99	2.25	-1.15	-1.15	-0.95	-1.71	-0.56	-0.59	-0.8	-0.66	0.14	0.32	0.46	1.52	-0.85	-1.21	-0.42	-0.31	-0.28	1.16	0.06	1.09
YGR214W_ORF	|| RPS0A || translation* || structural constituent of ribosome || YGR214W || ribosomal protein S0A || 1451551	-0.98	-1.93	-0.48	-1.34	-1.96	0.95	-2.7	-1.12	-0.58	-0.02	-0.56	0.23	-0.87	-2.43	0.8	0.81	-0.98	0.86	-0.52	-0.97	0.38	-1.18	0.54	0.78	1.02	-0.15	-0.93	-0.92	-0.88	-0.04	-1.13	-0.42	-1.05	0.63	-0.1	-0.24	-1.49	-0.91	0.62	-0.04	0.37	-0.36	0.29	0.59	0.87
YLR044C_OCH__ORF	|| PDC1 || pyruvate metabolic process* || pyruvate decarboxylase activity || YLR044C || YBOX_OCH1000080:YLR044C_PDC1_SGDID:S0004034_Chr_XII_234082-232391_RC_Ver_ORF_999_0 || 1455229	-0.92	-2.57	-3.64	-1.5	-2.5	-1.02	-3.78	-2.48	-0.94	-0.96	-1.42	-1.29	-2.66	-2.96	0.56	-0.96	-1.89	0.74	-1.1	-1.67	0.24	-1.21	-1.18	1.83	-3.14	-2.5	-1.99	-0.87	-1.05	-1.54	-1.59	-2.02	-2.06	-0.78	-1.97	-1.65	0.89	-1.75	-2.62	-1.63	-1.5	-1.12	0.42	-0.24	-1.1
YLL045C_OCH_DS100_ORF	|| RPL8B || translation || structural constituent of ribosome || YLL045C || YBOX_OCH1000163:DS100_YLL045C_YLL045C_Chr12_(complement(47758..47857))_100_bp._30_0 || 1450917	-0.94	-1.8	-1.67	-1.32	-1.34	0.45	-1.92	-1.36	-0.54	-0.4	-1.57	-0.08	-1.18	-2.01	1.09	0.1	-1.16	0.47	-0.82	-1.27	0.44	-0.68	-0.75	0.54	-0.16	-0.69	-1.14	-1.05	-1.28	-0.37	-1.11	-1.46	-1.17	0.36	-0.46	-0.12		-0.64	-1.23	-0.9	-0.05	-0.6	0.2	0.59	0.61
YMR121C_ORF	|| RPL15B || translation || structural constituent of ribosome* || YMR121C || ribosomal protein L15B (YL10) (L13B) (rp15R) || 1455787	-1.39	-1.62	-1.67	-0.87	-1.13	0.55	-3.16	-0.9	0.52	0.22	-1.26	0.46	-0.87	-1.48	0.67	-0.08	-0.5	0.15	-0.18	-0.34	0.19	-0.86	-0.09	0.68	1.56	-1.02	-0.59	0.15	-0.07	0.01	-1.13	-0.84	-0.28	-0.59	0.54	-0.62	-0.88	-1.11	-0.46	0.7	-0.04	-0.58	0.18	0.97	0.42
YOR185C_OCH__ORF	|| GSP2 || nuclear organization and biogenesis || GTPase activity || YOR185C || YBOX_OCH1000112:YOR185C_GSP2_SGDID:S0005711_Chr_XV_682106-681444_RC_Ver_ORF_328_0 || 1455207	-1.26	-2.18	-2.07	-1.54	-1.67	-0.36	-0.36	-1.9		-1.33	-1.86	-0.9	-1.1	-0.91	0.06	-0.6	-2.54	-0.01		-1.25	-0.26	-0.09	-0.62	0.78	-1.81	-1.63	-1.56	-1.57	-0.8	-0.65	-1.59	-1.35	-1.82	0.33	-4.37	-0.82	0.66	-1.41	-0.96	-0.38	-0.42	-0.18	0.54	0.05	-0.25
YPL079W_OCH_DS100_ORF	|| RPL21B || translation || structural constituent of ribosome || YPL079W || YBOX_OCH1000181:DS100_YPL079W_YPL079W_Chr16_(407537..407636)_100_bp._21_0 || 1454504	0.22	-1.18	-3.06	-0.91	-1.8	-0.2	-1.77	-1.46	1.26	-0.19	-0.97	0.02	-0.62	-1.25	0.17	-0.75	-1.28	-0.24	0.53	-0.56	0.17	-0.2	-0.59	0.25	-1.74	-1.31	-1.09	-0.23	-1.08	-0.48	-0.82	-0.76	-1.05	-0.13	1.31	-0.21	-0.66	-2.01	-1.53	0.13	0.16	-0.71	0.7	0.44	0.34
YLR048W_OCH__ORF	|| RPS0B || translation* || structural constituent of ribosome || YLR048W || YBOX_OCH1000081:YLR048W_RPS0B_SGDID:S0004038_Chr_XII_242233-242322,242682-243350_intron_removed_Ver_ORF_421_0 || 1453693	-0.65	-1.5	-1.67	-0.96	-1.33	0.77	-2.03	-1.17	-0.64	-0.65	-0.97	0.56	-0.96	-0.67	1.14	0.3	-0.95	1.03	-0.79	-0.41	1	-0.59	0.21	1.15	0.2	-1.27	-0.76	-0.61	-0.16	0.24	-0.5	-0.28	-1.12	0.91	-0.28	0.23	-0.07	-0.07	-1.47	0.41	0.19	-0.08	0.57	0.78	0.4
YMR142C_OCH_DS100_ORF	|| RPL13B || translation* || structural constituent of ribosome || YMR142C || YBOX_OCH1000168:DS100_YMR142C_YMR142C_Chr13_(complement(550105..550204))_100_bp._17_0 || 1452593	0.15	-1.32	-1.45	-0.63	-1.22	0.38	-1.36	-1.24	0.4	0.28	-1.16	0.09	-0.97	-1.19	0.12	0.25	-1.18	0.08	0.18	-0.61	0.83	-0.32	-0.57	0.56	1.77	-0.53	-0.84	-0.54	-1.33	-0.69	-0.95	-1.13	-1.2	-0.53	1.13	0.75	-0.3	-1.53	-1.28	-0.5	0.69	-0.35	2.67	0.01	0.01
YLR048W_ORF	|| RPS0B || translation* || structural constituent of ribosome || YLR048W || ribosomal protein S0B || 1454136	-0.91	-1.44	-2.21	-0.87	-1.62	1.05	-2.19	-1.3	-0.03	-0.61	-1.49	0.49	-0.24	-1.93	0.56	-0.98	-0.49	1.3	-0.31	-0.66	0.63	-0.88	-0.94	0.64	0.11	-1.64	-1.11	-0.94	-0.91	0.13	-1.48	-0.84	-1.44	0.18	-0.42	-0.27	0.08	-1.65	-1.32	-0.63	0	-0.3	0.22	1.14	-0.25
YML078W_ORF	|| CPR3 || protein folding || peptidyl-prolyl cis-trans isomerase activity || YML078W || cyclophilin|peptidyl-prolyl cis-trans isomerase (PPIase) || 1452711	-1.47	-1.62	-2.46	-0.6	-0.89	-0.17	-0.3	-0.17	-1.5	0.09	0.31	-0.34	-0.26	-0.71	-0.33	-0.77	-1.63	-0.51	-0.88	-0.18	-0.55	-0.59	-0.58	1.13	-1.31	-0.23	0.16	-0.97	-0.54	-0.01	-0.81	-0.62	-0.98	-0.07	-0.46	-0.07	-0.08	-0.35	-0.24	0	-0.14	0.07	0.59	-0.18	0.7
YGR085C_ORF	|| RPL11B || translation* || structural constituent of ribosome || YGR085C || ribosomal protein L11B (L16B) (rp39B) (YL22) || 1453110	0.2	-1	-1.8	-0.58	-1.22	0.1	-1.95	-0.65	-0.1	0.05	-0.7	0.85	-0.28	-1.03	-0.07	-1.02	-0.79	0.31	0.5	0.27	0.25	-0.44	-0.51	0.56	1.96	-0.33	-0.65	-0.09	-0.3	0.29	-1.19	-0.73	-1.21	0.23	0.85	0.41	0.06	-0.38	-0.33	0.23	0.08	-0.43	0.89	0.32	1.37
YGL076C_ORF	|| RPL7A || translation || structural constituent of ribosome || YGL076C || ribosomal protein L7A (L6A) (rp11) (YL8) || 1453632	-0.77	-1.61	-1.55	-0.86	-1.41	0.42	-2.3	-1.19	0.58	-0.13	-1.5	-0.12	-0.58	-2.57	0.14	-0.61	0.26	0.3	-0.31	-0.6	0.01	-0.64	-0.65	0.83	-1.85	-0.88	-0.76	-0.55	-1.01	0.48	-0.87	-1.03	-1.2	0.46	0.17	-0.35	-0.43	-1.24	-0.95	-0.23	-0.49	-0.34	0.35	1.34	-0.2
YNL255C_ORF	|| GIS2 || intracellular signaling cascade || molecular_function || YNL255C || GIG3 suppressor || 1455455	0.08	-1.86	-2.73	-0.93	-1.37	0.04	-1.28	-1.18	-0.01	-0.61	-1.04		-0.89	-0.73	0	-1.08	-0.48	0.09	0.07	-0.51	-0.34	-0.27	-0.6	0.53	0.48	-1.11	-0.56	-0.42	-0.8	-0.32	-1	-0.92	-1.17	-0.05	-0.24	-0.52	0.2	-2.1	-1.55	0.14	0.47	-0.52	0.54	0.48	0.09
YNL079C_ORF	|| TPM1 || pseudohyphal growth* || actin lateral binding || YNL079C || tropomyosin I || 1453404	-0.91	-1.77	-2.13	-2.09	-1.85	-0.68	-3	-2.24	-1.12	-0.94	-2.07	-0.66	-1.11	-2.08	0.17	-1.65	-5.2	-1.08	-0.95	-1.71	-0.43	-1.11	-1.23	0.64	2.19	-2.12	-1.75	-1.49	-1.72	-0.82	-1.38	-1.74	-2.5	-0.82	-1.17	-1.14	1.22	-1.06	-0.87	-1.14	-0.38	-1.06	0.39	-0.52	0.02
YFL039C_ORF	|| ACT1 || cell wall organization and biogenesis* || structural constituent of cytoskeleton || YFL039C || actin || 1453803	-2.06	-2.58	-2.9	-2.04	-2.49	-0.73	-3.34	-2.57	-0.89	-1.51	-2.02	-1.86	-0.84	-2.25	0.32	-1.61	-1.79	-0.57	-2.05	-1.78	-0.6	-1.21	-1.34	0.25	-3.09	-2.5	-2.27	-1.57	-1.91	-1.32	-2.19	-2.01	-1.93	-1.1	-2.57	-1.93	0.39	-2.44	-1.97	-1.27	-0.75	-1.59	-0.61	-0.76	-0.81
YER102W_ORF	|| RPS8B || translation || structural constituent of ribosome || YER102W || ribosomal protein S8B (S14B) (rp19) (YS9) || 1457412	-0.31	-1.63	-2.03	-1.05	-0.53	0.37	-1.95	-1.5	-0.55	-0.45	-1.33	0.09	-1.03	-1.9	-0.37	-0.83	-1.97	0.6	-0.67	-0.77	0.48	-0.41	-0.41	0.78	1.15	-1.15	-0.59	-1.09	-1.15	-0.56	-0.73	-0.9	-1.17	0.76	-0.33	0.09	0.1	-1.27	-0.65	-0.5	0.91	-0.47	0.68	0.49	0.56
YOR020C_ORF	|| HSP10 || protein folding || unfolded protein binding || YOR020C || heat shock protein 10 || 1455217	0.29	-1.44	-2.23	-0.91	-1.11	-0.14	-1.69	-0.43	0.96	-0.15	-0.76	-0.86	-0.78	-2.24	0.65	-0.22	-0.09	-0.38	0.82	-0.55	-0.21	0.27	-1.2	0.89	-0.8	-1.12	-0.55	-0.84	-0.67	-0.12	-0.72	-1.25	-1.74	-0.16	1.26	0.18	0.52	-1.53	-0.79	-0.24	0.58	-0.13	0.97	0.12	0.71
YGR085C_OCH_DS100_ORF	|| RPL11B || translation* || structural constituent of ribosome || YGR085C || YBOX_OCH1000229:DS100_YGR085C_YGR085C_Chr07_(complement(648287..648386))_100_bp._4_0 || 1451464	-0.7	-1.39	-2.12	-1.66	-1.65	-0.23	-2.9	-1.93	-0.12	-1.12	-1.51	-1.5	-0.66	-1.46	-0.75	-1.45	-1.91	-0.32	-0.35	-1.2	-0.32	-1.05	-1.11	0.03	0.55	-1.31	-1.41	-1.2	-2.17	-1.03	-1.84	-1.48	-1.89	-0.03	0.4	-0.45	-0.63	-1.61	-1.73	-1.03	0.24	-0.7	0.42	0.04	0.06
YLR293C_OCH__ORF	|| GSP1 || rRNA processing* || GTPase activity || YLR293C || YBOX_OCH1000088:YLR293C_GSP1_SGDID:S0004284_Chr_XII_721432-720773_RC_Ver_ORF_310_0 || 1454537	-0.97	-1.92	-2.15	-1.17	-1.94	0.17	-2.32	-1.5	0.07	-0.84	-1.24	-0.38	-0.44	-1.63	0.27	-1.38	-0.79	0.3	-1.51	-1.05	-0.24	-0.86	-1.07	0.82	-1.78	-1.37	-1.09	-1.15	-0.7	-0.63	-1.4	-1.16	-1.07	-0.38	-0.42	-0.34	-0.09	-0.64	-1.67	-0.62	-0.1	-0.22	0.15	0.35	-0.36
YML063W_ORF	|| RPS1B || translation || structural constituent of ribosome || YML063W || ribosomal protein S1B (rp10B) || 1451764	-0.43	-1.5	-2.2	-1.27	-1.24	0.27	-2.5	-1.65	0.65	-0.61	-1.26	0.26	-0.49	-1.12	1.3	-0.77	-0.71	0.27	-0.1	-0.82	0.31	-0.87	-0.83	0.51	1.47	-1.74	-0.99	-0.42	-1.06	0.46	-1.5	-1.49	-1.72	-0.07	0.54	-0.67	0.56	-2.48	-1.22	0.25	0.18	-0.67	0.48	0.67	-0.18
YHL033C_ORF	|| RPL8A || translation || structural constituent of ribosome || YHL033C || ribosomal protein L8A (rp6) (YL5) (L4A) || 1453639	-0.69	-1.61	-1.86	-1.01	-1.47	-0.01	-2.29	-1.15	-0.43	-1.09	-1.19	0.08	-1	-1.44	1.05	-0.46	-0.79	0.53	-0.51	-0.35	0.71	-0.46	-0.54	1.1	0.75	-1.23	-0.89	-0.72	-0.57	-0.1	-0.77	-0.94	-0.8	-0.32	-0.54	0.15	-0.04	-0.25	-0.02	-0.05	0.1	-0.31	0.53	0.55	-0.12
YPL237W_ORF	|| SUI3 || translational initiation || translation initiation factor activity || YPL237W || translation initiation factor eIF-2 beta subunit || 1454735	-1.04	-2.59	-1.73	-1.11	-1.54	-0.12	-1.39	-1.47	-1.53	-0.84	-1.4	-1.35	-0.48	-0.22	0.56	-0.46		0.04	-1.31	-0.69	0.39	-0.72	-0.72	0.94	1.18	-0.98	-0.98	-1.18	-1.03	-0.62	-1.18	-0.6	-1.94	0.61	-1.46	-0.41	0.37	-0.97		-0.24	-0.25	-0.53	0.14	-0.22	0.2
YBR109C_ORF	|| CMD1 || endocytosis* || protein binding* || YBR109C || calmodulin || 1455134	-0.51	-1.55	-2.15	-1.65	-1.61	0.39	-1.27	-0.95	0.3	0.08	-1.64	-0.68	-1.25	-1.19	0.15	-1.06	-1.37	0.25	-1.31	-1.18	0.11	-0.72	-0.73	0.81	-0.44	-1.67	-1.39	-0.79	-1.23	-0.81	-1.58	-1.63	-1.56	-0.19	-0.52	-0.71	-0.43	-0.93	-1.16	-0.61	-0.01	-0.39	0.32	0.18	-0.06
YJR104C_ORF	|| SOD1 || response to drug* || copper, zinc superoxide dismutase activity || YJR104C || Cu, Zn superoxide dismutase || 1454916	-0.02	-1.41	-0.78	-0.63	-0.89	0.34	-1.72	-0.85	-0.66	-0.26	-0.98	0.72	-0.6	-1.47	-0.47	-0.85	-2.91	0.16	-0.13	-0.09	0.54	-0.36	0.01	0.87	-0.85	-0.71	-0.15	-0.51	-0.17	-0.06	-0.82	-0.68	-0.63	0.89	0.35	0.61	0.32	-1.25	0.01	-0.02	0.37	-0.22	0.73	0.71	1.23
YIL133C_ORF	|| RPL16A || translation || structural constituent of ribosome* || YIL133C || ribosomal protein L16A (L21A) (rp22) (YL15) || 1451236	-0.2	-1.52	-1.99	-1.52	-1.31	0.04	-1.69	-1.55	-0.46	-0.89	-1.08	-0.1	-1.2	-1.77	0.12	-0.97	-1.07	0.21	-0.41	-0.87	0.43	-0.2	-0.49	0.6	0.77	-1.39	-0.96	-0.56	-1.01	-0.53	-1.25	-1.21	-1.54	0.28	-0.56	0.14	-0.26	-1.8	-1.27	0.03	0.32	-0.56	0.68	0.23	0.05
YDR454C_ORF	|| GUK1 || GMP metabolic process || guanylate kinase activity || YDR454C || guanylate kinase || 1451676	-0.09	-1.78	-2.24	-0.72	-0.88	0.15	-0.75	-0.78	-0.53	-0.42	-0.88	0.03	-1.5	-0.48	0.82	-0.38		0.34	-1.72	-0.45	0.81	0.31	0.12	0.84	0.02	0.91	-0.69	-0.71	-0.24	-0.57	-0.63	-0.86	-1.61	0.71	-0.6	0.37	-0.81	-0.06	-0.69	0.15	-0.14	-0.2	0.54	0.16	0.75
YKL050C_ORF	|| || biological_process || molecular_function || YKL050C || Hypothetical ORF || 1454521	-0.64	-1.83	-0.96	-0.49	-0.6	0.44	1.1	-0.94		-0.23	-0.01	-0.68	0.05	-1.67	-0.33	-0.3	-0.37	0.48	-4.69	-0.39	0.84	0.32	0.15	-0.98	2.35	-0.51	-0.88	-1.03	-0.66	-0.53	-0.15	-0.9	-0.27	0.81	-0.83	0.99		-0.12	-0.81	-0.6	0.85	1.34	1.21	0.18	0.75
YLR038C_ORF	|| COX12 || cytochrome c oxidase complex assembly || cytochrome-c oxidase activity || YLR038C || cytochrome c oxidase subunit VIb || 1457403	0.15	-1.44	-1.41	-0.3	-0.69	0.57	0.37	-2.2		0.73	-0.78	-0.59	0.43	-1.41	0.3	-0.18	1.23	-0.33	-1.08	-0.37	0.48	-0.18	-0.7	0.67	-1.4	0.43	-0.33	0.28	-0.05	0.19	-1.66	-0.25	0.2	0.67	0.15	0.39	0.46	1.8	0.17	0.57	0.7	0.37	1.16	0.71	0.7
YGL076C_OCH_DS100_ORF	|| RPL7A || translation || structural constituent of ribosome || YGL076C || YBOX_OCH1000145:DS100_YGL076C_YGL076C_Chr07_(complement(364238..364337))_100_bp._19_0 || 1457857	-0.73	-2.14	-1.28	-1.35	-0.79	-0.46	-1.99	-1.88	-0.3	-1	-0.97	-0.47	-0.95	-1.9	0.16	-0.77	-2.32	-0.44	-0.54	-1.35	-0.25	-0.86	-0.64	0.74	-2.18	-0.52	-1.21	-1.21	-1.64	-0.87	-1.15	-1.41	-0.88	-0.14	-0.47	-0.56	-0.15	-1.31	0.11	-0.74	0.12	-0.81	0.36	-0.23	0.87
YKL013C_ORF	|| ARC19 || mitochondrion inheritance* || structural molecule activity || YKL013C || Arp complex subunit || 1456288	-0.24	-0.5	-0.55	-1.19	-1.21	-0.28	-0.98	-4.29	-1.38	-0.72	-0.49	-0.93	0.23	0	0.48	0.25	-2.38	-0.32	-1.09	-0.02	-0.03	-0.71	-0.36	0.38	0.01	-1.19	-0.88	-0.53	-0.1	-0.18	0.35	-0.68	-1.26	0.46	-0.44	-0.23	-0.52	-0.45	-0.23	0.61	-0.31	-0.52	0.32	0.14	2.07
YBR181C_OCH_DS100_ORF	|| RPS6B || translation || structural constituent of ribosome || YBR181C || YBOX_OCH1000221:DS100_YBR181C_YBR181C_Chr02_(complement(591607..591706))_100_bp._4_0 || 1451481	-0.2	-1.38	-2.72	-1.14	-1.65	0.34	-1.81	-1.68	0.02	-0.8	-0.84	0.16	-1.63	-1.29	0.85	0.49	-0.89	-0.17	-0.19	-0.41	0.34	-1	-0.43	0.33	1.95	-0.28	-1.07	-0.58	-0.91	-0.79	-1.03	-1.26	-0.96	0.1	-0.03	0.15	-0.14	-1.67	-0.36	-0.24	0.37	-0.75	0.38	-0.05	0.1
YDR077W_ORF	|| SED1 || cell wall organization and biogenesis* || structural constituent of cell wall || YDR077W || cell surface glycoprotein (putative) || 1458470	-0.86	-2.64	-2.57	-1.73	-2.13	-0.75	-3.27	-1.8	0.01	-1.97	-1.59	-1.15	-1.64	-2.26	-1.32	-1.89	-2.8	-0.86	-0.61	-1.24	-0.6	-1.93	-0.86	0.23	-3.6	-1.84	-1.55	-1.76	-1.44	0.33	-1.5	-1.89	-1.75	-0.59	-0.65	-1.05	-0.37	-1.31	-1.78	-1.69	-1.21	-2.2	0.21	-0.74	-0.75
YHR060W_ORF	|| VMA22 || protein complex assembly* || unfolded protein binding || YHR060W || Required for V-ATPase activity. Required for the biogenesis of a functional vacuolar ATPase (V-ATPase), but not part of the final enzyme complex. || 1456985	-0.3	-0.7	-2.04	-0.92	-1.08	-0.33	-0.04	-0.24	-1.99	-0.6	-1.45	-1.94	0.01	0.43	0.08	-0.52	-1.57	-0.76	-4.85	-1.15	-0.67	0.06	-0.53	1.23	1.24	-0.99	-0.94	-0.17	-0.96	-0.28	-0.05	-2.3	-1.18	-1.07	-0.02	0	1.27	-2.52	0	-0.09	0.28	-0.18	0.87	-0.1	0.83
YDR154C_ORF	|| || || || YDR154C || Hypothetical ORF || 1455042	-0.71	-1.76	-1.8	-1.47	-1.14	-0.03	-2.21	-1.79	-0.58	-0.66	-1.82	-0.27	-0.8	-1.57	0.17	-1.13	-1.78	-0.02	-0.93	-1.6	0.2	-0.94	-0.76	0.26	-2.07	-0.83	-0.73	-1.2	-1.8	-1	-1.38	-1.6	-1.63	0	-0.75	-0.22	-0.09	-0.14	-1.55	-0.94	0.01	-0.68	0.4	0.24	-0.17
YFL038C_ORF	|| YPT1 || ER to Golgi vesicle-mediated transport* || GTPase activity || YFL038C || GTP-binding protein|ras homolog|similar to mammalian Rab1A protein || 1454701	-1.43	-1.55	-0.95	-0.82	-1.47	0.43	-0.77	-1.57	-0.89	-0.34	-0.39	-1.92	-0.68	0.52	0.22	-0.56	-1.75	0.01		-0.89	-0.06	-0.71	-1.07	0.49	0.47	-1.17	-0.9	-1.21	-0.44	-0.53	0.7	-0.65	-1.8	-0.09	-1.13	-0.63	0.56	-0.12	-1.06	-0.39	0.16	-0.45	-0.09	0.09	0.86
YDR155C_ORF	|| CPR1 || sporulation (sensu Fungi)* || peptidyl-prolyl cis-trans isomerase activity || YDR155C || cyclophilin|peptidyl-prolyl cis-trans isomerase (PPIase) || 1454166	-0.33	-1.33	-1.19	-0.82	-1.32	0.24	-2.07	-1.09	0	-0.76	-1.11	0.69	-0.73	-1.26	-0.19	-0.29	-1.39	0.52	-0.16	-0.49	0.51	-0.4	-0.62	1.04	-1.74	-1	-0.4	-0.58	-0.64	0.15	-1	-0.93	-0.93	0.26	0.66	0.18	0.28	-0.29	-1.43	-0.17	0.01	-0.01	0.69	0.54	0.32
YLR243W_ORF	|| || biological_process || signal sequence binding || YLR243W || Protein required for cell viability || 1450556	-1.39		-1.93	-1.32	-1.15	-0.26	-0.3			-0.81	-0.43		0.46	0.17	-0.92	-1.35	-2.34	-0.42		-0.65	-0.17	0.75	-1.12	-0.22	0.07	0.61	-0.9	-0.58	-0.93	-0.25	-1.05	-0.45	-0.46	0		-0.35			-0.28	-0.52	-0.44	-0.09	-0.44	-0.4	1.04
YNL031C_ORF	|| HHT2 || chromatin assembly or disassembly || DNA binding || YNL031C || histone H3 (HHT1 and HHT2 code for identical proteins) || 1456273	-0.71	-1.88	-1.27	-0.93	-1	-0.14	-2.41	-1.71	-0.33	-0.17	-0.04	-0.07	-0.5	-1.53	1.15	-0.16	-0.72	-0.1	-0.57	-0.44	0.06	-0.54	-0.11	0.5	-0.99	-1.03	-0.49	-0.97	-0.35	-0.52	-0.63	-0.72	-1.21	0.64	-0.54	-0.34	0.44	0.19	0.01	0.06	-0.43	-0.53	0.42	0.24	0.38
YPL198W_ORF	|| RPL7B || translation || structural constituent of ribosome || YPL198W || ribosomal protein L7B (L6B) (rp11) (YL8) || 1455551	-0.91	-1.78	-2.2	-0.79	-1.24	0.35	-2.18	-1.45	0.06	-0.6	-1.22	0.58	-1.21	-2.37	0.3	-1.04	-1.09	0.24	-0.39	-0.72	0.05	-0.95	-0.84	0.68	-1.83	-1.16	-1.01	-0.57	-0.89	-0.67	-1.47	-1.13	-1.06	-0.02	-0.57	-0.41	-0.26	-0.77	-0.95	-0.36	0.02	-0.4	0.06	0.68	-0.38
YHR186C_ORF	|| KOG1 || regulation of cell growth* || molecular_function || YHR186C || Kontroller Of Growth || 1458429	-0.35	-2.77	-1.87	-1.64	-2.01	-1.27	1.03	-0.2		-1.06	0.24	-2.84	-0.92	0.4	-1.84	-1.54	-0.35	-0.39		-2.92	-1.3	-0.07	-1.22	-3.81	-2.14	-1.12	-1.06		-1.69	-1.94	-1.82	-0.55	-1.2	-2.27		-3.45		-1.97	-0.1	3.07	6.54	4.94	-4.6	-0.94	-1.52
YKR031C_ORF	|| SPO14 || exocytosis* || phosphatidylinositol 3-phosphate binding* || YKR031C || phospholipase D || 1453352		0.9		-2.95	0.57	-1.52	-0.11	0.99		-0.72	-0.42	-0.12	0.47	2.09	-0.71	-0.27	-1.61	-2.75		-0.99	-1.6	-0.96	-1.09	-2.82	-1.99	1.12	-0.93	1.57	-0.77	-1.88	-1.02	-0.84	-0.63	-2.31					-0.35	4.32	6.41	3.74	-2.26	-3	-1.38
YOR133W_ORF	|| EFT1 || translational elongation || translation elongation factor activity || YOR133W || translation elongation factor 2 (EF-2) || 1453911	-1.92	-2.88	-3.04	-1.37	-2.23	-1.75	-3.78	-1.96	-1.58	-1.34	-2.18	-1.25	-2.33	-2.59	-0.28	-0.12	-1.74	-1.15	-1.08	-1.3	-0.51	-1.54	-1.49	-0.54	-2.7	-1.82	-1.86	-2.03	-1.88	-1.75	-1.89	-1.48	-1.14	-1.29	-1.78	-1.55	-0.65	-2.76	-2.14	0.81	5.04	0.72	-1.18	-1.3	-1.63
YHR165C_ORF	|| PRP8 || nuclear mRNA splicing, via spliceosome* || RNA splicing factor activity, transesterification mechanism* || YHR165C || U5 snRNP and spliceosome component || 1457206	-1.9	-0.01	0.26	-1.65	-2.11	-1.8		0.1		-1.43	-0.31	-3.17	-0.31	2.32	-1.77	-0.92	-1.54	-1.86		-2.05	-1.37	-0.44	-1.51	-2.04	-2.38	-0.52	-0.65	-2.25	-3.18	-1.83	-1.99	0.1	-1.67	-1.64		-3.22		-0.94	-0.46	1.46	5.52	1.93	-1.93	-1.02	-2.24
YNL106C_ORF	|| INP52 || cell wall organization and biogenesis* || phosphoinositide 5-phosphatase activity* || YNL106C || inositol polyphosphate 5-phosphatase || 1457610	-1.18	-0.53	0.97	-1.26	-2.42	-0.64	0.24	-0.62		-1.28	0.63	-3.22	-0.51	0.94	-1.08	-1.03	-0.98	-1.13		-1.15	-0.33	-0.37	-0.65	-1.28	-1.93	0.6		0.43	-1.63	-0.06	-0.97	-1.79	-0.48	-1.02	-4.03	-1.2		1.66	0.26	2.45	5.27	1.26	-1.56	-1.02	-0.59
YPR164W_ORF	|| MMS1 || DNA repair* || molecular_function || YPR164W || sensitive to methyl methanesulfonate (MMS), diepoxybutane, and mitomycin C || 1453452	-3.96	1.73	0.79	2.55	0.07	-0.16	-0.25	2.03		1.23	2.48	0.18		0.57	-0.77	0.83	0.49	1.54		1.88	0.13	-0.33	0.46	-1.73	-0.33	1.92	2.75	0.33	0.96	0.12	2.84	1.96	2.33	-0.1	1.12	-0.28	-0.47	-0.1	0.56	2.98	6.46	2.9	-0.15	-0.1	-0.38
YBR136W_ORF	|| MEC1 || telomere maintenance* || protein kinase activity || YBR136W || Required for mitotic growth, DNA repair and mitotic recombination, regulates phosporylation of Rad53p, required for dmc1 arrest and meiotic recombination, homolog of fission yeast Rad3 and human ATR || 1456631	-4.33	-0.74	0.74	-1.66	-1.35	-1.78	1.34	-0.01		-0.68	0.58	-4.05	0.1	-0.31	-1.45	-0.62	-0.16	-0.85		-2.01	-1.1	0	-0.46	-0.92	-2.71	1.25	-0.71	-0.73	-0.05	-1.34	-0.88	-0.17	-0.22	-2.14		-1.86		-0.24	-0.95	0.08	4.61	2.5	-3.46	-1.37	-2.14
YDR385W_OCH_US100_ORF	|| EFT2 || translational elongation || translation elongation factor activity || YDR385W || YBOX_OCH1000235:US100_YDR385W_YDR385W_Chr04_(1243120..1243219)_100_bp._5_0 || 1453061	-1.17	-1.75	-1.72	-1.89	-2.26	-2.04	-0.66		-4.01	-0.34	-1.46	-2.64	-0.54	-0.96	-0.21	-1.1	-0.95	-1.4		-1.45	-0.76	-0.59	-0.97	-0.98	-2.01	-1.09	-2.4	-0.57	-1.03	-1.56	-1.24	-2.11	-1.34	-0.88	-1.51	-1.3		0.18	-0.9	0.01	4.9	0.47	-1.04	-1.51	-1.61
YDR385W_AAA_3_NCR	|| EFT2 || translational elongation || translation elongation factor activity || YDR385W || POLYA_DS100_YDR385W_chr=IV_(1245899..1245998)_3:YBOX_AAA1000107 || 1457458	-1.74	-2.13	-2.04	-1.42	-1.61	-1.9	-1.33	-5.53	-2.5	-2.06	-1.43	-1.71	-0.86	-2.89	-0.9	-1.6	-1.54	-1.3	-2.31	-1.76	-0.83	-1.51	-0.6	-1	-1.42	-0.9	-1.73	-1.37	-1.16	-1.37	-1.23	-1.95	0.4	-1.4	-5.22	-1.78	-0.25	-3.01	-0.94	0.39	4.61	0.23	-1.46	-0.81	-1.32
YGR271W_ORF	|| SLH1 || regulation of translation || RNA helicase activity || YGR271W || SKI2-like helicase || 1451916	-3.86	0.9	1.89	-0.86	-2.12	-1.54	0.83	0.22		-0.15	0.05	-2.89	0.69	0.89	-1.01	0.13	0.61	-3.21		-0.73	-1.98	-0.75	-0.06	-1.77	-1.32	1.08	-0.56	-0.55	-0.82	-0.69	-1.09	-0.65	2.31	-1.66		-1.19		-1.63	-1.03	3.56	3.67	0.87	-1.77	-1.62	-0.17
YGL131C_ORF	|| SNT2 || biological_process || DNA binding || YGL131C || Hypothetical ORF || 1458444	0.16	-3.56	1.75	-0.42	-0.14	-0.83		3.04		0.36	-0.3	-3.24	0.28	2.23	-0.8	0.61		-0.6		-0.33	-0.11	0.18	-0.02	-6.06	-1.75	-0.81	0.43	-0.65	-1.02	-1.99	-1.38	1.31	1.1	0.02		-0.09		1	1.07	2.98	4.78	1.33		-0.73	-0.97
YJL005W_ORF	|| CYR1 || meiosis* || adenylate cyclase activity || YJL005W || adenylate cyclase || 1456189	-1.55	1.48	-3.55	0.82	0.85	-0.25	-0.62	-0.19		0.32	0.1	-2.55	0.65	-0.84	-1.08	0.13	-0.06	0.14		-1.24	0.19	-1.19	0.8	-2.47	-1.24	1.35	-1.66	-2.16	-0.36	-1.01	-0.51	-1.32	1.02	0.36		1.01		1.85	0.57	3.4	4.89	0.95	-2.19	0.09	-1.13
YOR133W_AAA_7_NCR	|| EFT1 || translational elongation || translation elongation factor activity || YOR133W || POLYA_DS100_YOR133W_chr=XV_(577781..577880)_7:YBOX_AAA1000077 || 1454954	-2.02	-2.56	-0.84	-1.38	-1.9	-2.02	0.3	-0.93		-1.16	-1.37	-1.98	-1.84	-0.57	-0.78	-1.43	-1.54	-1.3		-1.72	-1.06	-1.43	-1.84	-1.1	-3.04	-1.86	-1.64	-2.18	-1.62	-2.29	-1.11	-1.09	-1.02	-1.37	-3.93	-1.12		-1.03	-1.7	0.27	4.52	0.27		-1.54	-1.45
YDL145C_ORF	|| COP1 || ER to Golgi vesicle-mediated transport* || molecular_function || YDL145C || coatomer complex gamma-alpha-COP alpha subunit || 1455552	-2.27	-2.32	-1.84	-2.07	-1.81	-2.14	-2.11	-0.78		-1.16	-2.07	-2.39	-1.7	-3.03	-1.62	-0.69	-1.1	-1.06	-4.31	-2.6	-1.11	-1.45	-2.02	-1.6	-3.07	-1.49	-1.95	-2.7	-1.95	-1.82	-3.25	-0.28	-1.11	-2.6	-2.5	-2.53		-0.76	-0.7	-0.26	3.25	0.79	-1.82	-1.91	-1.69
YDR104C_ORF	|| SPO71 || spore wall assembly (sensu Fungi) || molecular_function || YDR104C || Meiosis-specific protein of unknown function, required for spore wall formation during sporulation; dispensible for both nuclear divisions during meiosis || 1454077	-0.12	-2.04	0.37	-0.24	0.08	-0.69		1.21		-2.05	1.2	-2.56		1.23	-1.18	-0.41		-0.99		-0.63	-0.12	-0.21	0.33	-2.46	-0.54	1.74	0.74	0.3	-0.51	-1.68	0.18	1.49	0.95	-0.35		-1.14		2.18	0.36	2.93	5.21	0.65		-0.69	0.46
IGX_YH_478862C	|| || || || || YBOX_IGX1000013:IGX_257_17:IGX_YH_478862C:[chromosome=VIII]:(complement(478787..478887)) || 1456808	-0.28	1.62	0.05	-0.28	-1.08	-1.97				0.09	1.34		1.64		-0.7	-0.02	-0.83	-0.73		-0.32	-0.11	0.76	-1.17		-0.98	-0.09	-0.08	-1.33	-0.95	-1.39	-1.34	0.74	-1.27	-1.11		0.12		0.43		2.26		4.27	-2.62	-0.34	-1.27
IGR_CHR14:(313453..314453)_213	|| || || || || YBOX_IGR1000224:gNL06_4:gNL06_4:chr14.fsa:(313453..314453):1001:bp._213_0 || 1450611	-2.57			-1.01	-0.96	-1.11	0.64	1.83		-1.8	-0.67				-0.35	0.16		-0.79		-1.29	-0.16	-0.52	0.31		-0.84	1.36	0.66	-2.87	-4.2	-1.53	-0.31	0.46	0.66	-0.05		-1.43		-0.94	1.78		2.67	0.4		-0.14	-0.26
YCR081W_ORF	|| SRB8 || telomere maintenance* || RNA polymerase II transcription mediator activity || YCR081W || activation mediator subcomplex of RNA polymerase I holoenzyme || 1450334	-0.6	1.09	0.99	-0.04	-1.13	-0.83	0.51	-1.26		-1.12	0.46	-2.52	-2.1	0.5	-1.19	-0.67	-0.71	-1.35		-1.8	-0.49	-0.4	-1.24	-1.99	-1.94	0.5	-1.52	-0.49	-0.94	-1.62	-1.23	-0.6	-0.28	-1.11		-1.45		0.39	0.15	-0.28	4.82	4.76	-1.9	-1.03	-0.66
YBR140C_ORF	|| IRA1 || negative regulation of Ras protein signal transduction* || Ras GTPase activator activity || YBR140C || GTPase activating protein (GAP) || 1458657	-1.19	0.18	-2.93		-1.56	-0.42	0.28			-0.17	-0.34	-2.89		1.48	-0.89	0.51	-1.05	-2.19		-2.15	-0.75	-0.88	-1.51	-2.47	-2.54	-3.48	-3.54	-1.41	-1.69	-1.95	-2.39	0.36	-3.18	-1.25		-2.75		1.89	-0.7	-0.45	3.46	1.97	-2.16	-1.82	-0.62
YNL088W_ORF	|| TOP2 || meiotic recombination* || DNA topoisomerase (ATP-hydrolyzing) activity || YNL088W || topoisomerase II || 1451040	-1.7		-0.8	-2.59	-0.96	-1.13	-0.93	-3.21		-1.25	-3.38	-2.13	0.35	-2.84	-1.93	-1.26	-1.35	-1.51		-2.25	-0.05	-1.56	-1.9	-1.53	-0.31	-1.46	-1.77	-0.29	-2.01	-2.48	-1.94	-0.92	-1.41	-1.3		-1.87				-0.26	3.62	0.86	-2.16	-1.81	-2.05
YNL172W_ORF	|| APC1 || mitotic sister chromatid segregation* || protein binding* || YNL172W || ubiquitin ligase subunit || 1455579	-1.28		0.55	-2.88	-1.45	-0.51	0.52	1.99		-0.45	0.31		0.46		-0.49	0.06	0.41	-0.09		-1.69	0.04	-0.52	-1.37		-1.01	0.13	-1.04	-1.16	0.1		-1.3	-0.63	-2.44	0.09		-0.73	-1.58	1.6	0.47	0.36	3.51	1	-1.65	-0.85	0.1
YBR289W_ORF	|| SNF5 || chromatin remodeling* || general RNA polymerase II transcription factor activity || YBR289W || chromatin remodeling Snf/Swi complex subunit || 1450939	-1.06	-0.09	0.88		-1.97	1.9	0.71	1.26		0.13	0.14	-2.54		-0.69	-1.52	-0.92		-0.26		-1.35	0.06	-0.34	0.65	-1.68	-1.38		-0.72	-3.85	-0.23	-1.18	0.62	1.08	0.29	1.07	0.26	-1.2		1.93	0.73	1.44	4.24	1.22	-1.07	0.71	1.35
YPR032W_ORF	|| SRO7 || establishment of cell polarity (sensu Fungi)* || SNARE binding* || YPR032W || yeast homolog of the Drosophila tumor suppressor, lethal giant larvae || 1451760	-0.39	0.5	2.37	-0.26	0.23	-0.41	-0.33	2.5		-1.95	1	-2.27	-1.09	0.42	-1.18	-0.57	-1.38	-0.45		-1.23	-0.79	-0.86	-0.85	-2.72	-2.55	-2.55	0.28	-1.52	-0.27	-2.6	0.46	0.29	-0.69	-0.58		1.84		1.99	1.49	3.32	4.99	1.67	-2.07	-2.52	-1.12
YER093C_ORF	|| TSC11 || cell wall organization and biogenesis* || protein binding || YER093C || Binding Protein of TOR || 1457095	-1.04	0.63		-0.45	-0.01	-0.06	0.57	1.19		-0.72	1.43	-3.19	-3.01	1.21	-1.27	0.3	-0.86	-0.12		-1.13	-0.12	-0.11	-1.77	-1.33	-0.61	-1.14	-1.73	-2.54	0.07	-1.15	-1.36	-2.98		-0.3		-0.84		1.21	0.04	1.9	4.43	1.32	-0.7	-0.46	0.15
YPL126W_ORF	|| NAN1 || ribosome biogenesis and assembly* || snoRNA binding || YPL126W || U3 snoRNP protein || 1454261	-3.76	-1.97	-0.67	-2.41	-2.54	-1.05	-1.58	-0.27		-0.85	-0.59	-1.49	0.8	-0.27	-1.19	-0.8	-0.23	-1.35		-1.25	-1.13	-0.79	-2.03	-1.48	-0.61	-2.55	-1.7	-1.89	-1.82	-1.38	-1.2	-1.66	-0.87	-2.1		-2.22		-2.45		-0.56	1.66	0.38	-2.18	-1.91	-2.05
YOR093C_ORF	|| || biological_process || molecular_function || YOR093C || Hypothetical ORF || 1455628	-0.69	0.6	1.67	0.11	0.82	-1	0.38	0.9		-0.04	0.81	-2.94	-0.19	1.95	-0.43	-0.34	0.43	-0.4		-0.21	-0.39	-0.66	-1.44	-1.45	-0.72	0.02	0.66	-0.41	-0.1	-1.58	-0.24	-0.97	1.15	-0.58		-0.2		0.19	-3.03	2.66	5.62	1.47	-2.66	-0.64	-1.1
YLR087C_TIL_8101_8400_119_ORF	|| CSF1 || fermentation || molecular_function || YLR087C || YBOX_TIL1000290:TIL_YLR087C_8101_8400_119_0 || 1456699			-0.06	-0.88	-2.4	-0.74	-0.25	0.88		-2.62					-0.37	0.23	-0.34	-1.27		-1.57		-0.9			-1.52	-1.98	-0.53				-0.96	0.5		-1.56		-3.19		1.01	0.44	0.77	3	0.41	-3.67		-1.99
IGX_YD_205982C	|| || || || || YBOX_IGX1000047:IGX_77_17:IGX_YD_205982C:[chromosome=IV]:(complement(205907..206007)) || 1456802	-2.06	-2.57	-2.13	-2.05	-1.74	-1.52	-2.54	-3.75	-2.73	-1.99	-2.04	-2.12	-1.27	-2.48	-0.75	-1.06	-1.37	-1.3	-3.29	-1.82	-0.43	-1.19	-1.01	-0.83	-2.54	-2.05	-2.22	-2.12	-2.14	-1.86	-2.17	-2.27	-3.27	-1.25	-4.3	-2.13	-2.63	-1.98	-2.38	-0.11	2.25	-1.03	-1.36	-1.37	-1.12
YER172C_ORF	|| BRR2 || U2-type spliceosome conformational change to release U4 and U1 || RNA splicing factor activity, transesterification mechanism* || YER172C || DEIH-box ATPase || 1451884	-2.22	-2.6	-0.47	-2.7	-2.8	-1.71	-0.66	-2.81	-2.74	-2.92	-1.94	-1.6	-2.31	-2.75	-2.19	-0.83	-2.3	-2.22	-6.08	-1.9	-1.53	-0.97	-2.27	-2.38	-1.88	-2.63	-2.6	-2.79	-1.15	-2.55	-2.12	-2.75	-3.32	-1.38	-4.32	-2.6		-2.84	-2.22	-1.46	2.14	0.24	-1.89	-2.31	-1.56
YBL078C_AAA_26_NCR	|| ATG8 || protein targeting to vacuole* || microtubule binding || YBL078C || POLYA_DS100_YBL078C_chr=II_(complement(80171..80270))_26:YBOX_AAA1000109 || 1457718	-1.06	-2.02	-0.04	-1.11	-0.86	-0.46	-0.59	-1.51		-0.44	-0.78	-2.7	-2.93	-2.84	-0.54	-0.69	-0.88	-1.16		-0.6	-0.59	-0.84	-0.89	-0.76	-0.9	0.43	-0.92	-1.51	-0.86	-0.7	-0.65	-1.24	-1.72	-0.98		-0.78	0.03	0.43	0.03	-0.34	4.34	0.12		-1	-0.74
YBL100C_ORF	|| || || || YBL100C || Sporulation || 1452582	-1.55	-2.28	-0.1	-1.29	-0.5	-1.39	2.31	-2		-1.82	-1.32	-1.68	-1.04	0.02	-0.35	-0.69	-1.14	-1.35		-0.49	-0.47	1.1	-0.01	-1.59	-2.52	-1.56	-1.01	-2.14	-1.73	-1.67	-1.67	-1.89	-1.81	-2.04		-1.79	-2.65	-0.49	-0.04	0.28	1.64	1.64	-0.45	-1.13	-0.97
YLR454W_ORF	|| || biological_process || molecular_function || YLR454W || The authentic, non-tagged protein was localized to the mitochondria || 1455655	-3.42	1.07	-1.42	-2.05		-2.07	-0.48	1.15		-1.81	-0.39	-2.77	-1.63		-0.93	0.1	-0.77	-2.87		-2.6	-1.48	-1.4	-1.24	-2.72	-2.79	-0.34	-2.19	-1.07	-0.24	-1.39	-0.79	0.47	-1.44	-1.34		-2.79		0.54	-0.26	-0.1	2.62	0.1		-2.04	-0.56
YIL126W_ORF	|| STH1 || meiosis* || ATPase activity* || YIL126W || helicase related protein|snf2 homolog || 1451838	-1.63	-1.89	-2.29	-2.85	-2.78	-1.09	-1.32	-1.32		-1.39	-1.24	-1.79	-0.91	-0.33	-1.62	-1.7	-1.55	-1.57		-1.72	-0.65	-1.6	-4.42	-1.56	0.52	-1.2	-1.38	-0.97	-1.66	-2.28	-2.69	-2.66	-0.86	-2.12		-2.15		0	-1.17	-1.16	1.63	-0.43	-1.77	-1.35	-1.13
YER190W_ORF	|| YRF1-2 || telomere maintenance via recombination || DNA helicase activity || YER190W || Y'-helicase protein 1 || 1455727	-1.09	-3.12	-1.4	-1.15	-0.92	-1.27	-0.48	-1.77		-1.93	-1.2	-2.03	-0.65		-0.01	0.16	-0.17	-1.17		-1.58	0.07	0.22	-0.81	-1.37	0.98	-0.92	-1.75	-1.65	-1.69	-1	-1	-1.23	-1.57	-0.77	-4.66	-1.39	-1.93	-0.86	-1.13	-0.81	2.56	0.27	-1.07	-1.44	-1.11
YNL325C_ORF	|| FIG4 || cellular morphogenesis during conjugation with cellular fusion || polyphosphoinositide phosphatase activity || YNL325C || Protein required for efficient mating, member of a family of eukaryotic proteins that contain a domain homologous to Sac1p || 1452611	-1.42	-2.53	-1.92	-1.75	-1.95	-1	1.09	-1.96		-1.24	-1.37	-0.59	-0.7	-1.7	-0.43	-1.37	-1.49	-1.59		-2.03	-1.3	-0.45	-1.34		0.83	-1.14	-2.4	-1.44	-1.55	-1.08	-1.28	-2.37	-3.03	-1.51		-2.28		-1.82	-1.3	-1.14	1.47	0.53	-2.08	-1.16	-0.88
YOR143C_ORF	|| THI80 || thiamin diphosphate biosynthetic process || thiamin diphosphokinase activity || YOR143C || thiamin pyrophosphokinase || 1450681	-1.97	-2.54	-1.55	-3.13	-1.91	-0.74	-1.97	-0.86	-2.2	-1.66	-1.08	-1.83	-0.64	-2.2	-2	-1.13	-1.11	-1.56	-2.28	-1.97	-1.45	-1.07	-0.97	-1.17	-2.41	-1.06	-1.97	-2.4	-1.61	-0.57	-2.06	-1.71	-2.39	-1.6	-3.42	-2.44	-3.37	-1.43	-1.74	-2.09	1.97	-0.03	-1.09	-1.56	-1.67
YOR155C_ORF	|| ISN1 || inosine salvage || IMP 5'-nucleotidase activity || YOR155C || IMP 5'-Nucleotidase || 1454282	-1.78	-1.97	-2.09	-2.14	-1.84	-0.78	-1	-1.02	-2.79	-1.39	-1.09	-1.4	-1.44	-1.83	-0.85	-0.5	-1.94	-1.76	-1.62	-0.65	-0.86	-0.44	-1.74	-1.48	-1.08	-2.34	-2.4	-2.24	-0.35	-2	-1.88	-0.68	-1.73	-1.57	-1.94	-2.31	-1.07	-1.47	-2.23	-1.49	2.22	-0.17	-0.53	-1.92	-1.11
YNL090W_AAA_20_NCR	|| RHO2 || cell wall organization and biogenesis* || GTPase activity* || YNL090W || POLYA_DS100_YNL090W_chr=XIV_(457484..457583)_20:YBOX_AAA1000061 || 1458378	-1.19		-0.68	-2.4	-0.97	-0.91	-2.09	0.04		-1.1	-0.47	-3.23	0.79		-1.3	-0.34	-0.82	-1.46		-1.73	-1.27	-1.05	-1.91		-1.27	-2	-0.96	-2.34	-1.94	-1.87	-2.14	-1.3	-1.79	-2.17	-1.2	-2.93		-0.41	-0.2	-0.48	2.2	0.25	-5.44	-0.21	-1.06
YKR054C_ORF	|| DYN1 || mitotic sister chromatid segregation* || motor activity || YKR054C || heavy chain of cytoplasmic dynein || 1452837	-1.12		-0.81	-1.53	-0.39	-0.48	0.89	-0.15		-0.63	-0.55		-0.05		0.47	-0.37	0.79	-1.43		-1.05	-1.68	-0.57	-0.86	-2.5	-0.12	-0.03	-0.88	-1.13	-1.3	-1.11	-0.74			-1.17				0.63	-1.92	0.28	1.27	1.17	-1.68	-1.16	-1.18
YBR073W_ORF	|| RDH54 || meiotic recombination* || DNA-dependent ATPase activity* || YBR073W || helicase (putative)|similar to RAD54 || 1450256	-1.06	0.2		-1.99	-1.65	-1	1.01	-0.38		-0.96	0.01	-2.98	-0.23	1.88	-1.47	-1.3	-1.84	-1.42		-0.84	-0.67	0.32	-0.48	-1.4	-0.31	-0.41	-1.42	-0.94	-1.89	-2.79	-0.73	0.35	-1.18	-0.98		-0.76		-0.08	-2.24	0.29	1.78	0.12	-1.7	-0.77	-0.56
YPR204W_ORF	|| || biological_process || DNA helicase activity || YPR204W || subtelomerically-encoded DNA helicase || 1451776	-1.11	-2.25	-1.63	-1.03	-0.81	-1.04	-1.35	-3.57		-1.51	-1.39	-1.42	-0.42	-1.58	0.1	-0.13	0.37	-1.41	-0.87	-0.8	0.24	-0.08	-0.34	-1.97	1.29	-0.45	-1.3	-1.79	-1.26	-1.29	-1.56	-2.12	-1.59	-1.06	-2.61	-1.32	-2.12	-0.29	-0.62	-0.81	2.15	0.06	-1.23	-1.29	-1.33
YNL339C_ORF	|| YRF1-6 || telomere maintenance via recombination || DNA helicase activity || YNL339C || Y'-helicase protein 1 || 1454462	-1.15	-2.59	-0.59	-0.68	-1.01	-1.1	-1.17	-1.52		-1.32	-0.95	-0.37	-0.69	-2.77	0.17	0.04	-0.26	-0.79	-0.88	-1.54	-0.04	-0.26	0.28	-1.76	1.76	-0.94	-1.5	-1.5	-1.71	-1.03	-0.38	-4.4	-1.62	-0.46	-1.63	-1.48	-2.34	0.89	-2.55	-0.42	1.81	0.45	-1.16	-1.19	-0.91
YDR545W_ORF	|| YRF1-1 || telomere maintenance via recombination || DNA helicase activity || YDR545W || Y'-helicase protein 1 || 1458646	-1.07	-1.9	-1.4	-0.62	-0.86	-1.09	-0.96	-1.01		-1.51	-1.51	-1.15	-0.89	-1.41	0.38	0.27	-0.42	-1.25	-1.05	-1.09	0.19	-0.1	-0.52	-1.13	1.21	-0.52	-1.77	-1.53	-1.5	-1.31	-1.32	-1.56	-1.71	-0.86	-4.11	-1.17	-1.96	-1.92	-1.38	-0.63	2.05	0.41	-1.07	-1.19	-0.98
YNL274C_ORF	|| GOR1 || metabolic process* || oxidoreductase activity, acting on the CH-OH group of donors, NAD or NADP as acceptor* || YNL274C || Putative hydroxyisocaproate dehydrogenase || 1458443		-1.26	-2.2	-2.09	-1.69	-1.59		0.04		-1.96	-1.83		1.23	-2.56	0.13	-0.94	-1.33	-0.99		-2.04	-0.61	-0.34	-1.22	-0.9	-2	0.29	-0.02	-0.18	-1.1	-1.72	-1.55	-2.5	-2.88	-1.8		-1.49	0.6	0.89	-2.02	-0.7	0.01	0.53	-0.31	-1.63	-0.16
YOR154W_ORF	|| || biological_process || molecular_function || YOR154W || Hypothetical ORF || 1455148	-0.83	-0.85	-1.39	-2.41	-1.99	-0.55	-1.67	-1.38		-2.71	-1.01	-2.27	-1.06	-0.16	-1.46	-1.05	-1.73	-1.67	-2.2	-2.01	-1.11	-0.1	-1.99	-1.88	-1.61	-2.5	-2.03	-1.77	-0.85	-2.03	-1.75	-0.04	-2.2	-1.17	-2.15	-2.06	-5	-0.34	-1.75	-0.68	1.72	-0.27	-0.86	-1.98	-0.27
YOR396W_ORF	|| YRF1-8 || biological_process || helicase activity || YOR396W || Hypothetical ORF || 1458211	-1.37	-1.41	-1.11	-1.29	-1.37	-1.54	-1.25	-1.55	-1.87	-2.46	-1.21	-1.29	-0.17	-1.54	-0.14	-0.13	0.12	-1.52	-1.55	-1.63	-0.34	0.47	-1.28	-1.91	0.97	-1.73	-1.64	-1.2	-1.68	-0.98	-1.64	-0.92	-1.28	-0.97	-1.55	-1.42	-1.7	-2.38	-1.85	-0.66	2.08	-0.17	-1.23	-1.52	-1.21
YHL050C_ORF	|| || biological_process || helicase activity || YHL050C || Protein of unknown function, potential Cdc28p substrate || 1458391	-1.07	-0.99	-1.64	-0.95	-1.56	-1.32	-0.41	-1.58	-3	-3.16	-1.96	-0.99	-2.04	-1.13	0.06	0.34	-0.12	-1.44	-0.92	-1.3	-0.49	0.01	-0.4	-1.46	1.03	-1.19	-1.75	-1.37	-0.96	-1.22	-1.6	-1.32	-1.34	-1.33		-1.16	-1.91	-0.59	-1.09	-0.64	1.81	0.2	-0.99	-1.54	-1.08
YOR290C_ORF	|| SNF2 || chromatin remodeling* || general RNA polymerase II transcription factor activity* || YOR290C || transcriptional regulator || 1450302	-1.11	-1.04	-0.96	-1.06	-0.07		-1.08	0.37			-1.43		-0.17	0.16	-1.2	-0.61	-0.9	-1.34		-1.8	-0.15	-0.38	-0.6		0.21	-0.49	-1.96	-1.97	-1.12	-1.78	-1.34	-0.09	-0.5	0.51		-0.3		-0.75	-0.56	-0.22	2.29	0.48		-0.66	-0.65
YKL087C_ORF	|| CYT2 || cytochrome c-heme linkage || holocytochrome-c synthase activity || YKL087C || cytochrome c1 heme lyase (CC1HL) || 1455811	-1.03	-2.54	-0.77	-1.28	-1.7	-0.69	0.94	-1.72		-0.87	-0.46	-0.22	-1.55	-1.52	-0.69	-1.38	-2.69	-1.03		-0.64	-1.06	0.38	-0.23	0.91	-0.95	-1.03	-1.35	-1.44	-0.81	0.19	-0.91	-1.76	-2.06	-1.09		-1.57	0.46	-1.51	-0.7	-0.92	0.95	0.65	0.18	-1.05	-0.1
TAG_FLAG_MARKER	|| || || || || YBOX_TAG1000014:TAG_5:TAGS_FLAG_59 || 1453063	-0.82	-0.04	-1.71	-1.59	-1.49	-0.95		-3.82		-0.91	-1.38	-0.26	-1.3	-0.47	-0.25	-1.02	-1.22	-1.28		-1.85	-0.93		-0.6	-0.91	0.91	-0.79	-3.08	-1.21	-0.76	-0.83	-1.16	-1.98	-2.11	-0.27	-1.45	-2.08	1.01	-0.59	-0.45	-0.57	1.52	0.73	1.15	-1.18	-0.4
YLR035C_ORF	|| MLH2 || DNA repair || molecular_function || YLR035C || Mutl Homolog || 1451432	-0.78	-2.27	-2	-1.64	-2.6	-1.05	-0.86	-0.62		-1.42	-1.51	-2.74	-2.46	-2.1	-1.06	-1.51	-0.37	0.07		-1.92	-0.9	-0.39	-0.67	-1.33	-1.44	-0.8	-1.65	-2.31	-1.61	-1.28	-0.93	-3.46	-2.25	-0.67		-1.08		-1.84	-0.36	-1.22	0.31	0.36	-0.84	-0.9	-0.56
YIL154C_ORF	|| IMP2' || DNA repair* || transcription coactivator activity || YIL154C || transcription factor || 1452452	-1.76	-2.4	-2	-0.88	-2.13	-1.44	0.42	-2.27	-3.93	-2.17	-2.34	-1.77	-1.93	-2.65	-1.04	-1.07	-1.38	-1.68	-4.85	-1.66	-0.52	-0.23	-1.21	-0.65	-1.44	-2.35	-1.85	-2.2	-1.85	-1.52	-2	-2.1	-1.89	-1.03	-7.2	-1.6	-0.39	-2.47	-2.06	-0.4	-0.11	0.02	-0.18	-1.44	-1.29
YFR015C_ORF	|| GSY1 || glycogen biosynthetic process || glycogen (starch) synthase activity || YFR015C || glycogen synthase (UDP-glucose-starch glucosyltransferase) || 1457092	-0.85	-1.3	-2.24	-1.67	-1.39	-0.99		-2.08		-1.41	-1.21	-1.34	-1.21	-0.3	-0.04	-1.43	-1.89	-1.74		-2.73	-1.33	-0.66	-1.05	-0.91	-2.18	-0.75	-1.87	-1.85	-1.61	-1.25	-1.46	-1.52	-2.96	-1.28		-2.34	-0.93	-1.56	-1.38	-1.37	0.65	1.15	-1.04	-1.66	-1.15
YIL111W_INT_1	|| COX5B || mitochondrial electron transport, cytochrome c to oxygen || cytochrome-c oxidase activity || YIL111W || YBOX_INT1000174:INT_1_YIL111W:NC_001141:155220..155307 || 1456339	-1.09	-1.39	-2.45	-1	-1.51	-0.56		-2.72		-0.91	-3.69	-2.93	0.46	-0.4	-0.93	-1.25	-2.15	-1.64		-1.32	-1.42		-0.58	-1.14	-2.27	0.17	-1.27	-1.43	-1.92	-0.82	-2.55	-2	-1.31	-1.03		-1.66	-0.68	-0.05	-1.02	-1.35	1	0.65	0.95	-2.28	0.67
YJR139C_ORF	|| HOM6 || response to drug* || homoserine dehydrogenase activity || YJR139C || L-homoserine:NADP oxidoreductase|homoserine dehydrogenase || 1457975	-1.63	-1.01	-2.5	-1.02	-2.78	-0.66	-2.73	-1.5	-1.02	-1.68	-1.87	-0.95	-0.43	-3.28	1.44	-0.97	-1.09	-0.38	-1.18	-1.7	-0.75	-1.16	-0.61	0.54	-2.57	-0.99	-2	-1.16	-1.71	0.1	-1.89	-2.69	-2.5	-1.12		-1.44	0.4	-0.87	-1.66	-0.83	0.56	-0.33	-0.48	-0.48	-1.02
YJR090C_ORF	|| GRR1 || response to DNA damage stimulus* || protein binding* || YJR090C || F-box protein component of the SCF ubiquitin-ligase complex, required for Cln1p and Cln2p degradation; involved in carbon catabolite repression, glucose-dependent divalent cation transport, high-affinity glucose transport, and morphogenesi || 1450393	-1.92		-0.63	-2.59	-1.82	-0.81	-0.75	0.56		-2.46	-2.23	-1.9	-0.16	-2.35	-1.27	-0.48	-1.62	-0.99		-1.27	-0.49	-0.65	-0.96	-1.29	-2.13	-0.93	-1.8	-0.29	-1.17	-1.55	-1.18	-1.17	0.05	-0.91		-1.85		-0.07	-0.4	-0.56	0.02	-0.03	-1.22	-1.11	-0.92
YIL157C_ORF	|| || biological_process || molecular_function || YIL157C || The authentic, non-tagged protein was localized to the mitochondria || 1458417	-1.74	-1.87	-0.79	-2.7	-1.86	-0.96		-1.23		-1.96	-0.52	-3.51	-0.82	-1.99	-1.06	-1.28	-3.81	-0.76		-0.98	-1.06	0.42	-1.57	0.67	-2.73	-2.09	-1.85	-1.84	-1.11	-1.35	-2.21	-2.54	-3.49	-1.62		-1.12	-0.08	-0.49	-1.3	-1.45	0.58	0.14	0.48	-1.36	-0.9
YKL129C_ORF	|| MYO3 || cell wall organization and biogenesis* || microfilament motor activity || YKL129C || myosin I || 1452345	-0.79	-0.75	-0.87	-0.82	-0.79	-0.22	-0.85	-2.84	-1.55	0.08	-0.68	-2.01	-0.19	0.07	0.26	0.34	-1.43	-0.62	-1.23	-0.99	-0.1	-0.89	-0.58	-0.36	0.51	-0.65	-1.27	-0.71	-0.54	-0.61	-1.14	-0.93	-0.94	-0.87	-0.83	-0.66	-1.28	-0.4	-0.79	0.6	2.06	-0.51	-0.48	-0.85	-0.06
YDR283C_ORF	|| GCN2 || protein amino acid phosphorylation* || protein kinase activity* || YDR283C || eukaryotic initiation factor 2 alpha (eIF2-alpha) kinase || 1450781	-1.11	-0.92	-1.06	-0.46	-1.57	-0.27	0.51	0.57		-1.23	0.31		-0.5	-1.82	-0.86	-0.78	-0.95	-1.44		-1.52	-0.51	-0.86	-0.93	-2.04	-0.45	-0.33	-1.36	-1.59	-1.01	-1.38	-2.41	-0.76	-1	-0.21		-0.93		-0.64	0.01	-0.26	1.52	0.2	-2.82	-0.9	-0.47
YDR188W_ORF	|| CCT6 || protein folding* || unfolded protein binding || YDR188W || Subunit of the cytosolic chaperonin Cct ring complex, related to Tcp1p, required for the assembly of actin and tubulins in vivo || 1450361	-1.57		-2.31	-1.41	-1.94	-0.92	-1.15	1.03	-1.43	-0.99	2.3		-0.16				-0.68	-0.46	-1.45	-1.1	-0.42	-0.84	-0.85	-0.64		-0.43			-0.39	-0.48		-1.9	-0.67	-1.16		-1.02	-1.74	-1.88	-1.79	-1.96	-0.71	-0.68	-0.95	-0.77	-1.15
YLL061W_ORF	|| MMP1 || S-methylmethionine transport || S-methylmethionine transporter activity || YLL061W || high affinity S-methylmethionine permease || 1451972	-0.33	0.54		-1.54	-0.45	-0.89		0.23		-0.12	-1.26				1.02			-3.8		-1.17	-0.28	-0.03	-0.49	-0.44	-2.47	0.49	-0.04	-0.65	-0.16	-1.36	-0.04	0.52	-0.1	-0.27		-0.08		1.5	-1.27	0.26	-1.28	-0.37	-0.51	-0.47	1.01
YDR190C_ORF	|| RVB1 || regulation of transcription from RNA polymerase II promoter* || ATPase activity* || YDR190C || RUVB-like protein, TIP49a Homologue || 1454175	-1.1		0.2	-0.57	-1.12	-0.32	-0.71			-0.19			0.73	0.36			0.8	-0.16		-0.49	-0.63	-0.9	-0.3	-0.8		0.33		-0.62	0.54	-0.71		-0.25	0.4	-0.9	-2.08	-1.59		1.4	-0.29	-1.41	-1.09	-0.36	-0.86	-0.56	-1.3
YOL084W_ORF	|| PHM7 || biological_process || molecular_function || YOL084W || Protein of unknown function, expression is regulated by phosphate levels; green fluorescent protein (GFP)-fusion protein localizes to the cell periphery and vacuole || 1456149	-1.35	2.41								-0.14	1.64	-2.11					2.69					1.44	-0.42					-2.52		-0.72									1.57		0.23	0.46			1.78
YPL092W_ORF	|| SSU1 || sulfite transport || sulfite transporter activity || YPL092W || major facilitator superfamily || 1456239	-1.36			-0.36	-1.33	-0.23	0.67						0.72	-0.02	1.21					-0.8		0.44		-4.7		1.44			0.68	0.37	0.58		0.66			-1.14					-1.3	0.52	-1.52	0.34	0.19
YLR410W-B_ORF	|| || || || YLR410W-B || TyB Gag-Pol protein; proteolytically processed to make the Gag, RT, PR, and IN proteins that are required for retrotransposition || 1450102	-1.97	-2.67	-2.98	-2.6	-1.7	-1.37	-3.84	-2.67	-1.42	-2.37	-2.6	-1.07	-2.71	-2.8	-2.02	-1.24	-1.97	-1.74	-1.3	-2.12	-1.06	-2.35	-2.44	-0.68	-2.39	-2.67	-3.04	-2.23	-1.76	-2.41	-1.79	-2.48	-2.72	-1.33	-2.01	-2.24	-2.2	-4.03	-2.34	-2.17	-1.09	-1.25	-1.51	-2.12	-2
YMR067C_ORF	|| UBX4 || ubiquitin-dependent protein catabolic process* || molecular_function || YMR067C || Hypothetical ORF || 1450103	-0.37	-1.99	0.31	-0.1	-0.4	-0.25	0.66	-0.87		-0.68	-0.6	-1.71	-0.45	0.81	-0.28	-0.62	-1.01	-0.53		-0.58	0.21	-0.26	-0.12	0.19	-2.01	-0.54	-0.87	-0.22	0.31	-0.72	-1.5	-0.84	0.29	-0.85		-0.91	-1.16	0.01	0.58	-0.17	-0.45	-0.03	-0.45	-0.08	-0.52
YER139C_ORF	|| || biological_process || molecular_function || YER139C || Hypothetical ORF || 1450104		1.84	0.31	-1.25	-0.32	0.26	1.08	1.52		0.89	0.55	-1.25	0.15	-0.86	-0.82	-1.48	-0.95	-0.63		-1.15	-1.6	0.33	-2.01	-1.51	0.32	-1.78	1.09	-1.31	-0.61	-0.52	-0.99	-1.45	1.22	-0.56	-1.37	-0.9		1.07	0.73	-0.5	-0.48	-0.19	-0.16	0.51	0.93
YDR389W_ORF	|| SAC7 || small GTPase mediated signal transduction* || signal transducer activity* || YDR389W || GTPase activating protein (GAP) for RHO1 || 1450105	-0.99	-1.02	0.17	-1.33	0.94	-1.22	0.18	-0.57	-2.34	-1.19	-0.21	-2.29	-0.45	-0.08	-1.63	-0.12	0.1	-0.64	-1.76	-0.82	-0.8	-0.2	-0.61	-0.52	-2.27	-1.35	-0.9	-0.97	-0.26	-1.14	-1.3	-0.89	-0.99	-0.31		-1.28	-2.96	0.58	0.18	-0.51	0.05	-0.13	-0.68	-0.44	-0.61
IGR_CHR08:(312646..313497)_734	|| || || || || YBOX_IGR1000182:gHR04_13:gHR04_13:chr08.fsa:(312646..313497):852:bp._734_0 || 1450106	-1.58	-1.61		-1.12	-2.83	-2.98	-1.52	-4.09		-2.09	-2.02		-0.47			-0.99	-1.5	-2.32		-4.25	-2.31	-1.24	-1.71	-2.52	-4.98	0.06	-3.48	-1.65	-2.33	-2.78	-3.31	-0.58	-2	-2.58		-3.5		-0.7	-1.66	-1.81	-0.06	0.09	-2.93	-2.64	-2.46
YLL012W_ORF	|| YEH1 || sterol metabolic process || sterol esterase activity || YLL012W || Hypothetical ORF || 1450107	-0.24	1.52	0.9	0.13	0.82	-0.32		1.21		-0.66	0.29		1.82			-0.2	0.41	0.1			0.64	0.79	0.31	-5.25	0.97	1.5	-0.47	0.09	0.28	0.3	0.94	-1.11	0.75	0.29		-0.06		2.4	-0.27	0.23	0.4	-0.11	-0.43	1.69	-0.6
YKL090W_ORF	|| CUE2 || biological_process || protein binding || YKL090W || Protein of unknown function; has two CUE domains that bind ubiquitin, which may facilitate intramolecular monoubiquitination || 1450108	1.44		1.03	1.09			2.14	2.25		0.94	1.23				-0.39	0.82				0.63	0.13	1.08	-0.46	-4.71	0.59	-0.12	0.82	-0.2	2.05	-0.35	1.52		0.71	-0.57		-0.29		0.56	2.7	0.6	0.26	0.84	-1.54	0.48	1.54
YNL245C_ORF	|| CWC25 || nuclear mRNA splicing, via spliceosome || molecular_function || YNL245C || Complexed with Cef1p || 1450109	0.15	0.03	-1.75	0.9	1.02	1.63	0.3	2.19		1.17	0.76	-0.92	-0.2	1.1	0.54	0.14	1.03	0.66		0.55	1.19	0.88	1.44	0.6	3.2	2.26	0.24	0.31	0.58	1.3	0.97	-0.76	0.82	1.61	0.84	0.57		2.26	0.42	1.23	0.57	0.08	0.58	0.94	1.33
YDR411C_ORF	|| DFM1 || unfolded protein response* || molecular_function || YDR411C || Hypothetical ORF || 1450110	-0.74	3.2	0.49	0.36	-0.02	-0.25	0.68			-2.8	0.95	-1.11		1.87		0.48	0.74	-2.3		0.35		0.44	0.13	-1.21	-0.61	0.58	-0.12	0.03	-0.18		0.23	0.79	-0.53	-0.45		-0.93		1.82	1.16	0.35	-0.36	0.34	-0.36	0.28	-0.67
YGL102C_ORF	|| || || || YGL102C || Protein required for cell viability || 1450111	1.32	1.05	0.48	1.94	2.15	2.6		1.09		2.4	1.19	0.47	1.29	1.96		2.2	2.33	1.43		2.02	1.94		0.93	-1.65	2.49	2.21	2.19	0.92	0.97	0.75	2.29	1.39	1.56	1.26	0.62	2.26		1.44	0.85	1.79	-2.56	1.23	1.35	1.71	2.53
YJR084W_ORF	|| CSN12 || adaptation to pheromone during conjugation with cellular fusion || molecular_function || YJR084W || COP9 signalosome (CSN) subunit || 1450112	-0.57	-0.33	-0.47	-1.45	-1.55	-0.91	-0.31	-0.04		-1.88	0.31	-2.77	-1.54		-1.11	-0.59	-1.35	-0.28	-1.8	-0.4	-0.62	-0.19	-0.03	-0.15	-1.59	0.14	0.18	-1.19	-1.38	-0.63	-0.87	-0.41	-3.77	-0.45	-1.85	-1.5	-1.04	-0.58	0.07	-0.93	0.25	0.02	-0.07	-1.52	-0.65
YKL055C_ORF	|| OAR1 || aerobic respiration* || 3-oxoacyl-[acyl-carrier-protein] reductase activity || YKL055C || 3-oxoacyl-[acyl-carrier-protein] reductase || 1450113	-0.04	1.07	-1.5	0.88	1.09	1.44	1.58	0.54		1.13	1.55		1.05		0.28	1.03	1.04	-0.71		1.63	1.06	1	0.39	-2.02	0.56	0.65	0.63	0.71	0.38	0.53	0.48	1.2	0.24	-0.34		0.48			1.11	1.06	0.62	0.64		0.14	0.69
YMR239C_ORF	|| RNT1 || ribosome biogenesis and assembly* || ribonuclease III activity || YMR239C || ribonuclease III || 1450114	-0.6	-0.91		-1.1	-0.64	-1.01	-0.96	1.35		-0.57	-0.11	-2.91	0.74	2.21		-0.75	-0.92	-0.71		-0.24	-0.15	-0.55	-0.59	-0.49		1.4	-0.88	0.08	-0.9	-0.86	-0.22	-0.34	-0.57	-0.59	-3.14	-1.51		-0.32	0.5		-0.25	-0.52	-0.97	-0.51	1.57
YER174C_ORF	|| GRX4 || response to oxidative stress* || thiol-disulfide exchange intermediate activity || YER174C || glutaredoxin || 1450115	-0.2	-1.15	-0.63	0.05	0.07	-0.26	-0.71	0.06		0.75	0.51	-0.94	-0.28	-0.7	-0.86	-0.34	-0.4	-0.45		0.78	-0.1	0.94	-0.79	0.95	-0.39	0.16	0.63	-0.63	-0.27	-0.46	0.87	-0.01	-0.49	-0.31	0.43	0.83		0.51	-0.79	-0.82	0.28	0.22	0.64	-0.76	-0.04
YJR049C_ORF	|| UTR1 || iron ion homeostasis* || NADH kinase activity* || YJR049C || associated with ferric reductase || 1450116	-0.54	-0.6	2.44	-0.98	-0.41	-0.42	0.13			0.15	0.58	-1.93	-0.35	1.28	-0.46	-1.43	-1.96	-0.32		-1.16	-0.01	-0.55	-1.19	-0.48	-0.38	-0.8	-0.71	-0.98	-0.79	-0.97	-0.64	-0.61	-0.41	-0.7		0.48	-0.69	1.26	0.13	-0.45	-0.27	-0.37	-1	-0.51	1.29
YNL280C_ORF	|| ERG24 || ergosterol biosynthetic process || delta14-sterol reductase activity || YNL280C || sterol C-14 reductase || 1450120	-0.04	2.68	-1.27		-1.6	-1.29	0.77	1.17		-1.08	0.94			0.68	0.79	-0.43	0.95	-0.22		-0.3	-0.41	-0.19	0.07	-0.87	-0.02	1.66	-0.09	-0.61	-1.44	0.01	0.01	-0.85	0.38	-0.49		-0.65		0.88	-0.04	-0.38	-0.81	0.29	-0.39	0.09	-1.23
YKR041W_ORF	|| || biological_process || molecular_function || YKR041W || Hypothetical ORF || 1450121	0.38	2.2	-2.34	-0.84	-1.69	0.01		2.86		-1.1	0.23	-1.43	-0.5	1.07	-0.89	-1.08	1.73	-1.89		-0.28	-0.17	1.53	0.5	-1.04	0.23	4.11	-0.92	-0.08	0.46	-0.57	-0.81	-2.59	0.24	-0.84		0.03		-0.32	0.6		0.44	0.61	-0.63	-0.95	0.4
YBR158W_TIL_2_203__ORF	|| AMN1 || negative regulation of exit from mitosis* || protein binding || YBR158W || YBOX_TIL1000021:TIL_YBR158W_AMN1_2_203 || 1450122					0.56		0.97			1.52	1.36					1.21		0.32				1.9		-0.51		2.05	1.58	1.67	0.02		1.65	2.46		0.33		-3.02			1.79	1.88	0.3	0.1	0.42		0.72
YMR274C_ORF	|| RCE1 || protein processing* || prenyl-dependent CAAX protease activity || YMR274C || protease || 1450123						0.15		1.08		-0.89		-3.18		2.23		-0.2	0.08	-0.16		0.31	-0.31	0.76			-1.3	1.18	0.5	2.13	0.51		1.41	1.31		-1.02		-1.16				1.03		-0.07	0.31	-0.31	0.44
IGR_CHR05:(COMPLEMENT(314163..314310))_78	|| || || || || YBOX_IGR1000044:NER029C:NER029C:chr05.fsa:(complement(314163..314310)):148:bp._78_0 || 1450125																																						2.71	-0.4			-0.07	1.46
YBR191W_ORF	|| RPL21A || translation || structural constituent of ribosome || YBR191W || ribosomal protein L21A || 1450126	0.69	-0.05	-1.85	-0.91	-1.29	-0.13	-1.52	-0.52	1.26	0.23	-0.73		-2.22	-1.87	0.21	0.02	0.5	0.4	1.54	0.3	0.05	0.05	-0.24	0.58		-0.97	0.14	0.55	-0.03	-0.17	-0.88	-0.31	0.43	0.19	2.24	0.5			-1.26	0.61	0.44	-0.06	1.33		0.12
YHL037C_ORF	|| || || || YHL037C || Hypothetical ORF || 1450128	-1.43		3.31	1.13	1.1						1.84	-2.96			-0.78	-1.12		-0.19			0.28		0.24		-0.78		1.93	-0.36	1.32	-0.26	1.31	1.86				0.19		2.15	1.29		0.62	0.3	-1.34		-0.36
YBR156C_ORF	|| SLI15 || telomere maintenance* || protein kinase activator activity || YBR156C || Mitotic spindle protein involved in chromosome segregation. || 1450129	-2.68	1.89	0.43	-0.12	0.45	0.16	1.07	-0.36		-0.88	-1.1	-2.31		1.14	-0.71	-1.15	-0.91	-0.12		-0.2	-0.32	0.26	0.36	-1.22	-2.08	0.34	0.26	-0.42	0.51	-1.82	-0.19	-0.42	-0.16	-0.1		-0.53		-0.7	-0.8	0.13	0.52	-0.04	-1.07	0.3	-0.83
YOL121C_INT_1	|| RPS19A || translation* || structural constituent of ribosome || YOL121C || YBOX_INT1000032:INT_1_YOL121C:NC_001147:complement(92440..92829) || 1450130	0.76	1.07	0.7	0.31	0.81	0.68	0.66	1.19		-0.31	0.82	-0.94	0.41	1.57	-0.95	0.93	0.42	0.33		0.67	0.78	1.31	0.08	0.49	2.68	0.86	0.4	0.89	0.18	0.28	-0.03	0.64	-0.24	0.25	0.74	0.95		1.37	0.84	1	0.81	0.46	0.51	0.54	0.06
SNR11_SNORNA	|| SNR11 || || || snR11 || YBOX_SNO1000003:SNO_SNR11_SNR11_SGDID:S000007293_Chr_XIII_snoRNA_150 || 1450132	-0.71	2.15	4.02	5.47	5.28	0.16	-0.18	4.34		-0.47	3.92	4.02	2.93	3.2	0.34	2.39	1.71	-0.42	0.49	2.22	-0.1	1.15	-0.07	-0.04	0.37	2.04	2.69	2	2.03	2.7	2.21	2.73	2.52	0.65	-4.96	-0.73	0.42	5.17	1.03	1.96	0.3	-0.12	0.78	0.08	-0.79
YPL137C_ORF	|| GIP3 || chromosome segregation* || protein phosphatase type 1 regulator activity* || YPL137C || Hypothetical ORF || 1450133	-3.81		-0.5	-1.59	-2.38	-0.84	-0.54	-0.57		-4.6	-0.92		-0.31	1.28		0.03	-0.44	-1.39		-2.74	-0.27	-0.34	-0.98	-3.04	-2.31	-1.84	-1.8	-3.12	-3.21	-3.53	-1.38	-0.58	-1.71	-1.2		-2.06		0.2	-1.76	-0.82	-0.81	-0.6	-2.32	-1.62	-2.17
YHR023W_ORF	|| MYO1 || cytokinesis* || microfilament motor activity || YHR023W || class II myosin || 1450134		-1.46	0.88	-1.32	-0.51	-1.1	-1.79	-0.83		-0.52	1.3	-3.87	-0.44	-0.09	-1.94	-1.1	-2.43	-1.68		-1.96	-1.59	-1.43	-0.54	-1.78	-0.81	-1.62	-1.91	-1.4	-1.97	-2.37	-1.14	-1.25	0.59	-1.57		-3.01		1.88	0.19	-1.72	0.44	-0.53	-2.02	-1.68	-0.67
YML119W_ORF	|| || biological_process || molecular_function || YML119W || Hypothetical ORF || 1450135	-0.26	-1.53	1.26	-0.18	0.25	0.07		-2.15		-0.19	-2.67		-1.95	2.2	-0.37	-0.41		0.4		-0.52	0.52	0.15	-1.3	-0.13	-0.21	0.59	0.78	-1.04	-0.1	-0.34	0.71	1.15	-1.9	-0.06		-0.85		0.97	1.53	-0.12	0.14	0.51	-0.65	-0.19	-0.78
YGR066C_ORF	|| || biological_process || molecular_function || YGR066C || Hypothetical ORF || 1450136	0.99			1.51	1.58	0.39	1.07			1.25	-0.05	-3.66	-0.67	1.57		0.2	0.47	0.96		1.02	-0.32	0.57	-0.02		-0.24	2.35		-1.19	0.68		1.95	2.45		0.52		0.82		2.71	0.77	1.85	0.72	0.1		0.23	1.98
YPL278C_OCH__ORF	|| || biological_process || molecular_function || YPL278C || YBOX_OCH1000253:YPL278C_YPL278C_SGDID:S0006199_Chr_XVI_15355-15053_RC_Unc_ORF_67 || 1450137	0.49	1.43		0.26		-0.1	5.2	2.98		-0.29		-3.19			-0.12	0.71	0.44	-0.94		-0.31	-1.18	0.27	-0.91		0.12		0.18	1.43	-0.56	0.14	1.19	2.01	0.88	0.45		-1.22		0.86	1.01	0.28	0.08	0.83	-0.9	0.82	0.17
YEL019C_ORF	|| MMS21 || DNA repair || SUMO ligase activity || YEL019C || Protein involved in DNA repair || 1450138	-0.05	0.73	1.94	0.1	-2.17	0.04	0.58	-1.65		-0.01	-0.36	-2.14	1.1	2.1	-1.31	-0.96	-0.8	-1.29		-0.05	-0.09	0.53	0.01	-0.99	-1.96	-0.34	-0.45	-0.88	0.5	-0.97	0.78	-2.71	-1.2	-0.58		-1.41		1.03	0.1	0.41	-0.68	0.03	-0.24	-1	-1.66
YDL097C_ORF	|| RPN6 || ubiquitin-dependent protein catabolic process || structural molecule activity || YDL097C || proteasome regulatory particle subunit || 1450139	-1.14	-0.68	-0.96	-0.89	-1.76	0.16	-1.42	-0.76	-0.78	-1.03	-0.25	-2.27	-0.44	0.63	0.03	-0.65	-0.69	-0.01	-0.83	-0.53	-0.26	-0.67	-0.2	0.3	-1.07	-1.21	-1.27	-0.57	-0.89	-0.93	-1.32	0.28	-0.68	-0.27	-0.56	-0.19	0.95	-0.36	-1.04	-0.39	-0.86	-0.09	-0.12	-0.81	-0.24
YDR457W_TIL_3601_3900_162_ORF	|| TOM1 || regulation of cell size* || ubiquitin-protein ligase activity || YDR457W || YBOX_TIL1000230:TIL_YDR457W_3601_3900_162_0 || 1450140		-0.41	-0.31	-1.65	-2.42	-2.77	-2.03	-1.27		-2.32	-1.51		-0.7	-0.74	-1.03	-0.52	-1.24	-2.5		-3.01	-1.66	-0.99	-0.83	-4.22	-0.88	0.59	-1.84	-1.84	-1.2	-1.67	-1.38	-2.78	-2.24	-1.74	-2.97	-2.21		0.63	-1.44	-1.92	-0.54	-1.51	-2.97	-1.98	-2.39
YPL172C_ORF	|| COX10 || heme a biosynthetic process || protoheme IX farnesyltransferase activity || YPL172C || farnesyl transferase (putative) || 1450141				0.28	1.14	0.67	0.72	-0.07		0.18	-0.28				0.33	0.57	0.58	0.28		-0.1		0.12	0.25		-1.37	1.18	1.16	-0.04	0.91	-0.68	-0.31	0.52		0.27		-0.62		1.75		0.16	-0.09	0.02	-1.78	0.64
YOR338W_ORF	|| || sporulation (sensu Fungi)* || molecular_function || YOR338W || Hypothetical ORF || 1450142		2.69			1.43			2.91		-0.94	1.8	-2.13					0.24	-0.39			-0.04		-0.1			2.87	1.68	0.8	0.35	-0.1	0.68					-1.24			1.09			-0.56		0.23
YFL011W_ORF	|| HXT10 || hexose transport || glucose transporter activity* || YFL011W || high affinity hexose transporter || 1450143	1.1	2.78	0.94	4.17	4.69	1.47	1.7	1.49		3.25	1.98	-4.1	1.86	0.85	-0.4	1.39		1.79		0.41	1.76		2.66		-0.23	2.82	2.42	0.26	0.22	0.3	2.73	2.01	2.46	2.64		3.41		0.34	2.04	-0.12		1.1	0.16	2.25	1.96
YER048W-A_ORF	|| ISD11 || iron-sulfur cluster assembly || molecular_function || YER048W-A || Similar to D. melanogaster protein; weaker homology to C. elegans protein with similarity to human cdk7/cyclin H assembly factor || 1450144	-0.03	0.97	-0.68	-0.18	1.11	-0.25	-0.25	0.31	0.42	0.16	0.03	-1.25	-0.26	0.43	1.47	1.01	2.5	0.02	-1.33	0.34	0.2	0.73	0.19	0.05	0.05	0.83	0.35	0.91	0.21	1.7	0.19	-0.55	-0.14	-0.08	0.18	-0.34	-0.06	-0.15	0.99	1.36	-0.27	-0.02	0.67	0.38	0.6
ARS308-CEN3_ARS	|| || || || || ARS308-CEN3_ARS308-CEN3_chr03.fsa_(114318..114936)_619_bp._371_0:YBOX_ACM1000007 || 1450145	0.16		3.13	1.45	1.24	0.47		3.82			2.85	-4.18		2.6	-0.49	-0.67	-0.72			0.5			-0.46		-0.8		-1	0.35	0.56	-1.12		0.61	1.76	-0.87		-0.3			-0.3	0.94		0.6	-2.01	1.3	1.26
TM(CAU)Q2_TRNA	|| || || || tM(CAU)Q2 || YBOX_TRN1000037:TRN_TM(CAU)Q2_SGDID:S000007326_Chr_Mito_tRNA_8 || 1450146	1.15				0.03		1.08			0.74	2.42		0.07	1.83	-2.04			0.94				1.71	0.5		-1.47		2.01	0.69	-1.13	-2.28					1.93	-0.12		0.84	1.35	-0.72	0.28	0.14	0.53		1.55
YOR166C_ORF	|| || biological_process || molecular_function || YOR166C || Hypothetical ORF || 1450147				-0.32	0.11	0.33	-0.14			0.62	0.13		1.37			0.39	0.58	-0.95		0.61	-0.41	0.14	0.05	0.17	-1.15	0.11	0.77	-0.31	0.21	-0.15	3.89	-0.32	-0.06	-0.33		0.47		1.6	0.83	-0.09	-0.81	-0.32	-0.27	-0.88	-0.1
YLR148W_ORF	|| PEP3 || telomere maintenance* || protein binding || YLR148W || vacuolar membrane protein || 1450149	0.1	-1.46		-1.13	-1.32		1.41			-2.67		-1.72			-1.34	-1.2	-1.09	-1.38		-2.18	-1.46	-1.07	0.53	-2.15	-2.23	2.02	-1.83	-1.6	-0.2	-0.64	-1.17	0.8	1.4	-2.38		-2.59		-1.16	-2.58	-1.65	-0.78	0	-2.57	-0.61	-3.57
YER005W_ORF	|| YND1 || protein amino acid glycosylation || nucleoside-diphosphatase activity || YER005W || apyrase (NDPase/NTPase) || 1450150	-1.13	1.02	1.74		-0.88	-0.74	0.53	0.66		0.66	0.77	-2.09	1.17	2.35	0.1	0.46	0.81	-0.08		-0.09	0.4	0.47	0.95	-0.85	0.79	-0.27	-0.8	-0.63	-0.2	-0.76	0.39	0.12	0.69	-0.46		-1.27	-4.99	-0.66	0.11	-0.16	0.31	0.22	-0.42	0.75	-1.03
CEN2_CEN	|| CEN2 || || || CEN2 || CEN2_CEN2_chr02.fsa_(238209..238477)_269_bp._183_0:YBOX_ACM1000014 || 1450151	-2.19			0.44			1.55				1.98	-2.67			-2.88								-0.26					0.69	0.87	-1.57		2.62				-0.99		-0.6	1.27		0.85	0.68
YDR083W_ORF	|| RRP8 || telomere maintenance* || methyltransferase activity || YDR083W || nucleolar protein required for efficient processing of pre-rRNA at site A2; methyltransferase homolog || 1450152	-0.55			-2.27	-1.38	-1.2	0.19	0.73		1.65	0.28	-3.71	-1.13	-1.97	-0.89	-1.42	-2.09	-0.96		-1.87	-1.18	-0.39	-1.19	-0.27	1.64	-0.19	-1.01	-0.97	-1.49	-2.08	-0.5	-1.41	-1.75	-0.46	-4.06	-1.24		0.81	0.4	-0.1	-0.05	-0.55	-0.14	-0.85	0.09
YGR238C_ORF	|| KEL2 || conjugation with cellular fusion* || molecular_function || YGR238C || Protein that functions in a complex with Kel1p to negatively regulate mitotic exit, interacts with Tem1p and Lte1p; localizes to regions of polarized growth; potential Cdc28p substrate || 1450153	-0.69	-0.35	2.33	-1.87	0.45	0.01	0.65	2.44		0.23	0.44	-2.68	-1.54	-0.13	-0.78	-0.43		-0.21		-0.32	-0.95	-0.48	-1.17	-0.28	-1.81	-1.74	-0.19	-0.89	-0.69	-1.05	-0.61	1.11	0.01	0.07	-2.05	-0.91			1.67	-0.47	0.24	0.05	-0.6	-0.07	-0.71
YEL054C_ORF	|| RPL12A || translation* || structural constituent of ribosome || YEL054C || ribosomal protein L12A (L15A) (YL23) || 1450154	0.28	-1.16	-1.49	-0.63	-1.05	0.4	-1.73	-0.77	1.26	-0.31	-0.57	0.96	-1.06	-1.2	0.99	-0.05	0.04	0.61	0.4	-0.02	0.38	0.21	-0.39	0.55	-0.41	-0.78	-0.3	-0.25	-0.63	0.27	-0.64	-0.69	-0.98	0.32	1.15	0.42	-0.09	-1.44	-1.08	-0.13	0.52	-0.05	0.86	0.48	0.53
YBR255C-A_ORF	|| || biological_process || molecular_function || YBR255C-A || Hypothetical ORF identified by homology. See FEBS Letters [2000] 487:31-36. || 1450155	0.27	1.74	2.17	1.03	1.89	0.62	0.88	1.66		1.37	2.16	-1.03	0.34	-0.74	0.1	0.4	0.89	0.75		1.29	-0.18	0.09	0.5	0.05	1.8	1.08	0.82	0.6	0.55	0.1	1.21	0.88	1.55	0.61		0.54	-0.6	1.51	1.19	0.17	-0.07	0.17	0.18	0.94	-0.24
IGR_CHR05:(COMPLEMENT(64205..64373))_12	|| || || || || YBOX_IGR1000039:NEL020C:NEL020C:chr05.fsa:(complement(64205..64373)):169:bp._12_0 || 1450156	0.86	2.33	-0.25	1.09	0.88	-0.13	0.23	1		0.12	1.07	-1.25		1.67		0.52	0.81	0.21		0.44	-0.03	0.4	0.33	-0.17		0.07	0.01	0.15	0.4	0.6	-0.39	0.47	0.46	-0.11		-0.09		0.25	0.06		0.02	0.33	-0.16	0	0.42
YDR048C_ORF	|| || || || YDR048C || Hypothetical ORF || 1450157	-2.46			0.74			2.32					-4.4			-1.44			-0.89		0.34		0.94						0.31		-2.68	1.19	0.63		0.08		-2.14		1.87	1.71	0.3		0.97		0.04	-0.57
YPR123C_ORF	|| || || || YPR123C || Hypothetical ORF || 1450158			2.56		3.48	1.8		2.86		1.38	1.87		-0.05				3.64	2.13		2.19	2.9		1.51	-0.77	3.18	4.99	2.75	0.91	1.4	1.64	4.07	1.64	1.63			1.32	1.3	1.66	2.07	2.01			0.61	1.95	0.56
YOR373W_ORF	|| NUD1 || microtubule nucleation || structural constituent of cytoskeleton || YOR373W || Component of the spindle pole body outer plaque, required for exit from mitosis || 1450159	1.43		0.66	-1.15		-0.2	-0.65	-1.41		-1.15	0.49	-1.33	0.85		0.38	-0.63	-0.67	-0.39		-0.55	-0.39	-0.57	-0.06	-1.27	-1.03	-1.51	-2.21	-0.78	-0.21	-1.06	-0.78	-0.95	-0.67	-0.61		-2.23	-0.94	0.12	0.49	-3.23	-0.33	-0.59	-0.6	-0.53	-0.52
YPL257W-A_ORF	|| || || || YPL257W-A || TyA Gag protein; the main structural constituent of virus-like particles (VLPs) || 1450161	0.09	-1.42	-2.66	-0.67	-1.65	-0.46	-3.78	-1.84	-1.83	-1.59	-1.72	-0.72	-1.63	-2.36	-2.24	-1.23	-1.79	-0.38	-0.83	-1.58	0.34	-1.81	-1.33	-0.44	-2.55	-2.56	-1.96	-0.93	-1.19	-1.43	-0.95	-1.98	-2.27	-0.21	-2.67	-1.8	-2.08	-2.26	-0.76	-2.33	-1.22	-1.59	-1.43	-0.67	-1.7
YFLWTAU1_LTR	|| || || || YFLWtau1 || YBOX_LTR1000014:YFLWTAU1:SGDID:S000006929:Chr:VI:144198-144518_100 || 1450162	-0.18			-0.63	0.02	-1.2		0.54		-2.42	3.48	-1.94	0.47		-2.54	-2.74		-1.08			-1.01		-1.85				1.39	0.49	-0.4	-2.73	0.88	-2.37				-0.76			-0.46			1.25		-0.95	1.67
YER040W_ORF	|| GLN3 || positive regulation of transcription from RNA polymerase II promoter* || transcription factor activity* || YER040W || transcriptional activator of nitrogen-regulated genes || 1450164	-0.78	0.99		-0.72	-1.04	0.39	0.59	-1.53		0.62	1.16	-1.88	-2.77		-1.34	-0.23	-0.92	-0.3		-1.39	-0.06	-0.05	-1.29	-1.53	-1.28	-0.14	1.2	-0.44	-0.31	-1.65	-0.22	0.29	-0.74	0.92		-1.3		2.12	-1.7	-0.64	0.13	0.1	-0.66	0.15	-0.11
YFR049W_TIL_4_103__ORF	|| YMR31 || translation || structural constituent of ribosome || YFR049W || YBOX_TIL1000115:TIL_YFR049W_YMR31_4_103 || 1450165	0.09	0.13	0.16	-0.37	-0.79	0.16		0.9		0.04	-1.39	-1.58		0.8	0.99	-0.44	1.94	0.2	-1.81	-0.61	0.54	0.16	0.03	0.96	-0.17	-0.71	-0.81	-0.39	-0.27	0.06	-1.08	0.18	0.62	0.93	-0.1	0.27	0.4	-0.58	0.1	0.55	-0.39	0.19	0.87	0.25	1.44
YGR273C_ORF	|| || biological_process || molecular_function || YGR273C || Hypothetical ORF || 1450166	-1.33	-1.83	-1.2	-0.8	-1.34	-0.66	-1.62	-1.94		-0.02	-0.78	-2.89	-3.84	-0.44	-0.48	-0.99	-1.78	-0.6	-2.11	-0.81	-0.97	-0.78	-2.42	-0.09	-0.09	-0.93	-0.62	-1.26	-1.58	-1.04	-2.48	-0.94	-0.94	-1.6	-1.65	-0.99		-2.96	0.08	-1.86	-0.49	-0.86	-0.79	-0.76	0.35
YBL036C_ORF	|| || amino acid metabolic process || alanine racemase activity* || YBL036C || Single-domain racemase, possibly non-specific due to the lack of the second domain, which presumably determines specificity || 1450167	-1.36	-0.73	-1.33	-1.82	-1.46	-0.52	0.94	0.26		-0.66	-0.52	-2.85	0.84	0.84	-0.36	-0.95	0.56	-1.08		-0.96	-0.6	-0.35	-0.91	-0.26	1.07	-1.22	-1.34	-1.63	-1.18	-1.32	-1.88	-0.61	-2.28	-1.08		-1.39	-0.96	-1.02	-0.04	-0.75	-0.28	0.46	-0.62	-0.37	-1.47
YMR140W_ORF	|| SIP5 || cellular response to glucose starvation || molecular_function || YMR140W || Sip5 facilitates the interaction between the Reg1Glc7 phosphatase and the Snf1 kinase. || 1450168	0.62	0.94	-0.37	-0.74	-0.22	-0.62	0.07	0.3		-1.3	-0.66	-2.07		-3.42	0.07	-0.07	0.27	-0.1		0.1	0.41	0.28	0.02	-2.22	-0.82	-0.15	-0.73	0.12	-0.39	-1.11	-0.29	0.07	0.97	-0.36		-1.44	-1.47	0.61	0.54	-0.13	-0.51	-0.17	0.05	0.01	-0.35
YNL111C_ORF	|| CYB5 || electron transport* || electron carrier activity || YNL111C || cytochrome b5 || 1450169	-0.38	-0.4	-1.31	0.13	-0.23	0.52	0.45	0.1	0.41	0.23	-0.56	-0.36	0.25	1.57	-0.23	-0.18	-0.75	-0.55		-0.7	-0.08	-0.38	-0.43	0.7	0.03	-0.3	-1.29	-0.02	0.39	0.18	-1.17	-0.39	-0.58	0.14		-0.86		0.02	-0.23	0.19	-0.16	0.27	0.55	-0.14	0.32
YMR105C_ORF	|| PGM2 || glucose 1-phosphate utilization* || phosphoglucomutase activity || YMR105C || phosphoglucomutase || 1450170	-0.07	0.11	3.52	0.55	-0.74	0.04	0.62	2.62		-1.56	-1.72				0.34	0.32		-0.07		-0.84	0.52	-1.03	-0.47	0.05	-4.16	0.72	0.52	-0.96	-1.99	-0.14	-1.06	2.49		0.62		-0.11	0.04	1.01	1.11	-1.46	-0.69	0.37	-0.32	1.58	0.62
YLR183C_ORF	|| TOS4 || G1/S-specific transcription in mitotic cell cycle || transcription factor activity || YLR183C || Target of SBF || 1450171	-0.6	-0.35	-0.49	0.2	-1.51	-0.71		0.79		-0.66	-1.21	-2.5	-1.97	-0.55	-0.3	-1.11	-1.09	-1.35		-1.63	-1.12		-0.26	-0.68	-0.8	-0.41	-3.67	-0.88	-0.81	-1.38	-0.78	-1.38		-1.46		-2.33		1.23		-0.91	-1.13	0.01	-0.48	-1.15	-1.87
YDR290W_ORF	|| || || || YDR290W || HU sensitive mutant. || 1450172		2.94		-1.88			1.95									0.07						0.31	0.44					-0.47		-1.34						-2.17		2.5	-0.59			0.48
YJL136C_ORF	|| RPS21B || translation || structural constituent of ribosome || YJL136C || ribosomal protein S21B (S26B) (YS25) || 1450173	0.53	-0.97	-1.19	-0.22	-0.19	0.46	-1.41	-0.78	0.79	0.33	-0.03	1.1	-0.36	-0.87	-0.14	-0.85	-1.79	0.02	1.25	0.44	-0.48	0.35	0.05	0.55	-0.18	-0.46	0.37	-0.01	0.09	0.56	-0.34	-0.25	-0.55	-0.35	1.27	0.88	0.1	-0.31	0.15	0.4	0.74	-0.51	0.96	0.06	0.47
YBR022W_ORF	|| POA1 || tRNA splicing || phosphoric monoester hydrolase activity || YBR022W || Hypothetical ORF || 1450174	-1.81	0.7	1.69	-0.84	-0.76	-0.12	0.98	0.58		-1.47	-1.21	-2.35	0.39	0.91	-0.07	-0.37		-0.17		-1.36	0.05	0.43	-0.61	0.13	-0.28	-0.05		-0.16	-0.31	-4.06	-0.99	0.81	-1.54	-0.85		-0.64	-0.14	-0.13	-0.29	0.37	0.54	0.68	0.37	-0.57	-0.09
YDR427W_ORF	|| RPN9 || ubiquitin-dependent protein catabolic process || structural molecule activity || YDR427W || proteasome regulatory particle subunit || 1450175	-1.4		0.16	-1.36	-2.05	-1.17	-1.26	1.36	-4.09	-0.22	-0.35	-1.82	-1.57	-0.43	0.35	-0.03	-1.33	-0.6	-2.38	-1.85	-0.52	-0.67	-0.99	-0.03	-2.46	-1.62	-1.79	-0.96	0.82	-1.19	-0.71	-0.7	-1.32	0.1	-1.23	-1.9	0.15	0.1	-0.49	-0.54	-1.11	-0.63	-0.56	-1.8	-0.34
YNL089C_ORF	|| || || || YNL089C || Hypothetical ORF || 1450176	0.27	2.75		1.35		1.55	0.74	4.13		1.08	3.46			2.17	0.86	0.73	0.73	0.38		0.96	1.05	0.42	0.9	-1.01	3.95	1.45	1.59	-0.12	0.29	0.55	1.12	1	0.49	0.09		0.57		1.94	1.47	2.36	1.17	0.38	-0.3	1.03	0.75
YDR255C_ORF	|| RMD5 || negative regulation of gluconeogenesis || molecular_function || YDR255C || Required for Meiotic nuclear Division || 1450177	0.66	0.4		0.11	0.57	0.83	1.09	1.08		-0.54	1.24	-1.83	0.04	1.52	0.29	0.24	0.93	0.66		0.33	0.67	0.7	-0.13	-0.83	-0.56	0.06	0.32	-0.31	-0.09		0.47	-0.08	-0.21	-0.09		-1.08	-0.11	-2.97	0.47	-0.09	-0.22	0.35	0.31	0.09	0.05
YMR280C_AAA_30_NCR	|| CAT8 || positive regulation of transcription from RNA polymerase II promoter* || specific RNA polymerase II transcription factor activity || YMR280C || POLYA_DS100_YMR280C_chr=XIII_(complement(826815..826914))_30:YBOX_AAA1000048 || 1450179		3.18	2.9	1.69	1.69		1.39	2.2		0.52		-3.31	1.3		-0.96	-0.03		-0.15		1.07	-1.05	1.39	0.19					0.45	0.23	-1.33	1.88	0.23	0.03	0.19		-0.43		2.67	1.17	0.67		1.12		0.91	1.74
YMR312W_ORF	|| ELP6 || regulation of transcription from RNA polymerase II promoter* || molecular_function || YMR312W || RNA polymerase II Elongator protein subunit || 1450180	-0.75		-0.36	-1.75	-2.15	-0.75		-0.22		-0.72	-1.29	-2.76	-1.61	-0.57	-0.3	-0.75	-0.09	-0.88		-2.14	-0.73	-0.82	-0.26	0.53	-1.94	-2.42	-2.69	-0.98	-1.37	-1.33	-2.17		-1.84	-0.49	-1.53	-0.75	-4.09	-1.63	0.67	-0.47	-0.96	-0.87	-0.25	-0.85	0.34
YPL003W_ORF	|| ULA1 || protein neddylation || NEDD8 activating enzyme activity || YPL003W || Protein that acts together with Uba3p to activate Rub1p before its conjugation to proteins (neddlyation), which may play a role in protein degradation || 1450181	0.37	1.29	1.4	0.75	0.4	0.18		2.54		-0.2	0.19	-2.8		0.45	0.43	0.47	1.49	0.36		-0.02	-0.06	0.55	-0.35	-0.37	0.08	0.03	0.21	0.62	0.23	0.05	-0.39	0.82	-0.57	0.21		-1.02	-0.53	-2.75	0.9	0.28	0.01	-0.1	0.1	-0.21	0.43
YLR390W_ORF	|| ECM19 || cell wall organization and biogenesis || molecular_function || YLR390W || ExtraCellular Mutant || 1450182	0.26	-1.17		0.31	0	0.2	0.31			-0.02	0.5	-1.2	0.33	0.23	0.16	-0.1	-0.11	-0.21		-0.46	-0.04	0.15	0.42	0.29	-1.01	-0.08	0.13	0.35	0.2	0.07	0.05		-1.99	0.41	1.25	0.26	-1.14	2.18	0.62	0.3	0.28	-0.17	0.62	-0.19	0.26
YOL081W_ORF	|| IRA2 || response to stress* || Ras GTPase activator activity || YOL081W || GTPase activating protein|highly homologous to Ira1p|neurofibromin homolog || 1450183	-1.48	1.16	1.3	0.43	-2.56	-0.86	-0.62	0.89	-4.46	-0.97	1.5		-0.28		-0.65	0.51	-0.06	-1.82		-0.4	-1.28	-0.24	0.53	-3.08	-1.13	-0.24	-2.95	-1.25	-0.97	-0.18	-1.46	0.93	-0.4	-0.72		0.79		1.04	1.38	0.33	2.79	1	-2.35	0.41	-0.89
YJR005C-A_ONO_ORF	|| || biological_process || molecular_function || YJR005C-A || YBOX_ONO1000064:YJR005C-A_YJR005C-A_SGDID:S0028523_Chr_X_448672-448391_RC_Unc_ORF_91 || 1450184	-0.34	-0.8	-1.61	-0.82	-0.31	-1.11		-0.12		-0.51	-0.25	-0.99	-0.96	-1.89	-0.53	-0.41	-1.1	-0.26		-0.21	-0.54		-0.85		0.42	-0.13	-0.56	-1.2	-0.67	-1.23	-0.18	-0.63	-1.1	-0.85	1.65	-1.64		-0.23	-1.42	-0.31		1.68	0.3	-1.1	0.1
YJR122W_ORF	|| CAF17 || biological_process || molecular_function || YJR122W || CCR4 transcriptional complex component || 1450185	-0.09	-0.98	2.11	0.48	1.31	0.08		3.5		0.44	-1.07	-3.12		1.77	0.34	0.48		0.54		0.49	0.57	0.68	0.49	0.12	-1.57	1.73	0.7	-0.07		-0.7	1.4	1.41	1.75	0.47		-0.17	-1.95	1.04	1.01	0.18	0.11	0.47	0.01	0.68	0.47
YNR075W_ORF	|| COS10 || endocytosis || molecular_function || YNR075W || Protein of unknown function, member of a family of conserved, often subtelomerically-encoded proteins || 1450186	0.82	1.68		-0.15	-1.12	-0.67		1.69		-2.48	1.86			0.89		-0.06		-0.62		-0.07	0.72	1.2	0.9	0.1	0.29	-0.3	0.04	0.65	-0.08	-0.26	0.86	0.46			-0.64	-0.43			0.68		-0.42	-0.19	-0.88		-0.07
YJL171C_ORF	|| || biological_process || molecular_function || YJL171C || Hypothetical ORF || 1450188	0.27		0.16	0.14	-0.52	1.59	-0.01	1.2		0	0.55			0.71	0.75	-0.07	1.34	0.47		-0.08	0.45	-0.22	-0.19	-0.06	-0.01	0.68	0.95	0.46	0.04		-0.2	-0.2		0.23	-0.62	-1.2		0.2	1.01	0.56	-0.01	-0.15	0.37	0.56	0.31
YNL296W_ORF	|| || || || YNL296W || Hypothetical ORF || 1450189		2.06								0.16										-0.14			0.22						1.48	-1.78	1.97	2.26		-0.42		-0.98		1.84	-0.79			0	-0.36		0.85
YOL046C_ORF	|| || || || YOL046C || Hypothetical ORF || 1450190	-0.11	0.34	-1.13	0.43	0.44			0	-1.25	0.43	1.29			-0.96	-0.86	0.03	-0.43	0.08		-0.5	0.24				0.41	2.27	2.49	0.27	-0.14		2.16	0.47	-0.18	-0.17	0.24	-0.33		0.55	0.72	0.38		0.56	-0.73	1.31	0.29
YDR462W_ORF	|| MRPL28 || translation || structural constituent of ribosome || YDR462W || Mitochondrial ribosomal protein of the large subunit || 1450191	0.35		0.13	0.63	0.62	0.84	0.8	1.11	-1.08	0.54			1.08				-0.43	-0.09		0.94	0.65	-0.2	-0.04	0.87		0.95				-0.35	0.46	1.09	1.26	1.19		0.49	0.28	1.26	0.17	-0.3	0.77	0.35	0.71	0.52	0.49
YGL153W_ORF	|| PEX14 || protein targeting to peroxisome* || protein binding || YGL153W || Peroxisomal peripheral membrane protein (peroxin) involved in import of peroxisomal matrix proteins || 1450192	0.01	0.84	1.59	0.31	1.13	-0.11				0.92	2.01	-1.25	0.58	1.24	-0.29	0.44	1.57	0.79		0.28	-0.03	0.15	0	0.24	0.63	1.29	0.24	-0.19	0.17	-0.28	1.16	1.61	1.2	0.63		0.2		-0.53	0.47	-0.03	-0.03	0.28	-0.36		-0.36
YLL028W_ORF	|| TPO1 || polyamine transport || spermine transporter activity* || YLL028W || plasma membrane-bound exporter, involved in the detoxification of excess spermidine || 1450193	1.18	1.63	2.62	2.13	1.68	1.55	-0.22	0.71		0.53	1.25	-0.22	1.53	2.38	1.18	0.71		1.09		1.06	1.75	1	0.91	0.19	0	1.56	1.6	1.31	1.68	2.07	1.57	1.29	0.85	1.54	-6.15	0.75	0.13	1.28	1	1.28	0.76	0.08	0.26	1.26	0.96
YLR406C_AAA_29_NCR	|| RPL31B || translation || structural constituent of ribosome || YLR406C || POLYA_DS100_YLR406C_chr=XII_(complement(930777..930876))_29:YBOX_AAA1000037 || 1450194	-0.16	1.48	0.83	1.36	1.45	1.17	0.17	1.11		0.59	1.65	-1.16	0.17	-0.91	-0.45	1.36	1.28	0.86		0.87	1.07	0.78	0.65	0.02	3.42	1.42	1.62	-0.34	-0.23	0.16	1.45	1.07	0.14	1.13		-0.08		0.94	-0.04	1.43	0.51	0.29	0.91	0.84	0.25
YGL118C_ORF	|| || || || YGL118C || Hypothetical ORF || 1450195	-0.89	2.18								0.89	2.83	-4.85				-0.25		-0.23		1.03								0.06	-3.23	-2.34	1.68			-0.02		0.18		1.92	0.81			0.39	-0.81		0.48
YPL277C_OCH_US100_ORF	|| || biological_process || molecular_function || YPL277C || YBOX_OCH1000196:US100_YPL277C_YPL277C_Chr16_(complement(16869..16968))_100_bp._25_0 || 1450196	0.58	2.32			1.54		1.52	1.76		0.5	2.63	-2.17	1.46	1.85	-0.93	-0.52		0.56		0.32	-1.85	0.16	-1.1		-0.49		0.7	-2.43	-2.15	-1.27	1.7	0.59	1.75	-0.01	-0.62	-1.14		2.4	1.72			-0.02	-0.92	-0.62	-0.81
YKR057W_ORF	|| RPS21A || translation* || structural constituent of ribosome || YKR057W || ribosomal protein S21A (S26A) (YS25) || 1450197	0.45	-0.86	-0.85	0.09	-0.7	0.42	-1.48	-0.62	0.91	0.3	-0.02	1.74	-0.18	-0.98	-0.31	-0.12	-0.53	0.2	1.23	0.17	-0.24	0.39	0.68	0.56	0.38	-0.63	0.28	0.15	-0.06	0.67	-0.24	-0.3	0.34	0.46	1.27	0.95	-1.04	0.14	-0.13	0.38	0.8	-0.52	0.98	-0.25	0.01
YOR204W_ORF	|| DED1 || translational initiation* || RNA helicase activity || YOR204W || ATP-dependent DEAD (Asp-Glu-Ala-Asp)-box RNA helicase, required for translation initiation of all yeast mRNAs || 1450198	-0.21	-1.29	-0.22	0.04	-0.26	1.11	-1.96	-0.41	-1.84	-0.96	-0.42	-1.26	-0.31	-0.1	0.4	0.81	-0.5	1.09	-3.24	0.2	1.15	0.09	0.12	0.68	-1.01	-0.69	-0.2	-1.49	-0.24	0.17	-0.37	-0.03	-0.84	1.86	-0.46	-0.14	0.26	0.57	0.53	0.22	-0.13	-1.63	0.29	1.3	0
YML020W_ORF	|| || biological_process || molecular_function || YML020W || Hypothetical ORF || 1450199	0.91	-1.61	0.69	1.66	0.88	0.25	-0.46	1.19		2.59	1.88	-0.48	0.9	-0.66	-0.61	-0.12	0.64	1.12	0.29	1.13	0.19	0.34	1.07	0.77	-0.92	1.78	2.21	0.51	0.61	1.25	2.06	1.48	1.75	0.13		2.69	0.49	-1.13	0.68	-0.39	-0.21	0.46	1.32	1.05	0.95
YMR158C-A_OCH_US100_ORF	|| || biological_process || molecular_function || YMR158C-A || YBOX_OCH1000192:US100_YMR158C-A_YMR158C-A_Chr13_(complement(573331..573430))_100_bp._30_0 || 1450200	-1.69	-2.03	-0.51	-1.22	-0.76	-0.44	1	-2.01		-2.22	-2.08	-1.3	-0.12	0.3	-1.18	-0.66	-2.54	-1.99		-1.84	-0.87	0.1	-1.21	-0.83	0.29	-0.02	-0.65	-0.75	0.07	-0.74	-1.58	-1.85	-2.84	-1.49		-1.54		-1.72	-1.65	-0.67	0.47	0.44	-0.54	-2.15	-1.66
YOR032C_ORF	|| HMS1 || pseudohyphal growth || transcription factor activity || YOR032C || myc-family transcription factor homolog || 1450202	1.41				1.17		-0.46									-0.86		1.62				0.5						0													-0.1	-0.15	-2.37
YLL063C_ORF	|| AYT1 || secondary metabolic process || trichothecene 3-O-acetyltransferase activity || YLL063C || Transacetylase || 1450203					0.99			2.64		-0.03	0.78		1.04		-1.27	0.29	0.74	-0.41		0.12			0.99	-0.95	0.09	0.57	0.17	-1.69	0.86		0.99	1.24		-0.12		-0.73					1.31	0.33	-2.89		0.31
YPL188W_ORF	|| POS5 || response to oxidative stress* || NADH kinase activity || YPL188W || involved in oxidative stress || 1450204	-1.15	1.42	0.32	1	-0.69	-0.47	0.59	0.32		-0.61	1.65					0.34	0.58	-0.01		1.4	0.28	0.51	-0.72	-0.28	-0.28	0.87	0.79	0.01	1.01		-0.06	2.3	0.29	0.52		2.16		0.44		0.59	0.16	0.36	-0.8	0.15	0.2
YGR104C_ORF	|| SRB5 || telomere maintenance* || RNA polymerase II transcription mediator activity || YGR104C || RNA polymerase II holoenzyme/mediator subunit || 1450205	-0.48	-0.01	2.61	0.03	-0.32	-0.25	0.44	0.93		-0.69	-0.75	-2.62	1.34	1.93	-0.19	-0.92		-1.37		-0.56	0.13	-0.43	0.38	-0.12	-0.91	0.55	-0.19	-0.39	-0.61	-0.46	-0.58	-0.58	-0.73	0.41		-1.06		1.64	0.53	-0.55	0.04	-0.48		-0.01	0.1
YDL170W_ORF	|| UGA3 || regulation of transcription from RNA polymerase II promoter* || transcription factor activity* || YDL170W || zinc finger transcription factor of the Zn(2)-Cys(6) binuclear cluster domain type || 1450206	-1.48	1.66	-0.98	0.47	-1.12		1.37			1.15	2.52	-3.98	-0.18	2.28	-0.12	0.11		0.76		0.51	-0.74	0.42	0.41	-0.67	0.18		-2.83	-0.75	0.71	-0.12	1.1	1.08	1.35	-0.17	0.23	0.61		1.82	1.59		0.7	0.34	-0.56	0.81	1.83
YIL045W_ORF	|| PIG2 || regulation of glycogen biosynthetic process || protein phosphatase type 1 regulator activity || YIL045W || 30% identity to YER054C/GIP2 || 1450207	-0.08	0.58	2.07	-0.3	-0.73	-0.13	0.78	1.55		0.17	0.55	-3.38	0.63		0.06	-1.07	-0.68	-0.4		-0.34	-0.15	-0.74	-1.54	-2.01	-1.6	0.86	-0.21	0.41	-0.72	-0.53	1.15	0.38	0.08	-0.55		-0.86	-0.26	1.17	-0.97	-1.4	0.91	0.2	-0.28	-1.47	0.41
YDL135C_ORF	|| RDI1 || actin filament organization* || signal transducer activity* || YDL135C || Rho GDP dissociation inhibitor with activity toward Rho1p || 1450208	-0.36	-0.09	0.07	0.47	-1.1	-0.1	-1.02	-0.7	-1.35	0.41	0.01	-1.63	0.62	0.17	0.32	-0.89	-0.66	0.07		-0.05	0.11	-0.56	-0.28	0.13	-0.57	-1.06	-0.81	-0.35	-0.18	-0.84	-0.88	0.02	0.63	-0.03	-0.4	1.55	0.52	0.07	-0.72	-0.51	-0.37	-1	0.25	0.34	-0.15
YDR365W-A_ORF	|| || || || YDR365W-A || TyA Gag protein; the main structural constituent of virus-like particles (VLPs) || 1450211	-1.23	-2.73	-2.23	-1.11	-1.7	-0.24	-3.99	-1.77	-1.58	-1.58	-1.81	-0.04	-1.85	-2.01	-2.1	-0.77	-1.17	-1.14	-1.35	-1.69	-1.08	-1.9	-0.94	-0.93	-1.07	-2.67	-2.5	-1.98	-1.24	-0.99	-1.01	-2.19	-1.89	0.07	-0.47	-1.65	-2.23	-2.37	-1.67	-2.42	-0.93	-1.33	-1.19	-1.04	-1.61
YLR014C_ORF	|| PPR1 || regulation of transcription, DNA-dependent* || transcription factor activity || YLR014C || zinc finger transcription factor of the Zn(2)-Cys(6) binuclear cluster domain type || 1450212	0.33	1.68		-0.36	-2.77		1.23						-1.17				-0.87	0.02					0.77			-0.67	1.18	-0.43		-0.46	-0.85		0.62			-1.56			0.98		-0.08	0.19		-0.15	0.16
YIL080W_ORF	|| || transposition, RNA-mediated || protein binding* || YIL080W || TyB Gag-Pol protein; proteolytically processed to make the Gag, RT, PR, and IN proteins that are required for retrotransposition || 1450213	-0.73		1.71	-0.58	-0.14	-0.85	-0.2	0.21		-0.57	0.88			0.01	-0.79	-0.77		-0.64		-1.29	-1.77	-0.64	-2.05	-2.43	-2.18	1.13	-0.47	0.11	-0.26	-1.26	-0.02	0.81	0.36	-0.63	-6.39	-3.35		1.22	1.01	-0.38	-0.08	-0.46	-1.97	0.03	-0.2
YDR121W_ORF	|| DPB4 || chromatin silencing at telomere* || epsilon DNA polymerase activity || YDR121W || DNA polymerase II (epsilon) 4th subunit || 1450214	0.64	-2.58	0.64	1.35	-0.04	0.73	0.02	-3.61	-0.78	1.77	0.2	-2.46	-0.57	-0.63	-0.42	-0.44	-0.04	-0.51	-1.18	0.03	-0.04	0.06	0.6	1.14	1.66	-0.58	0.28	0	-0.06	-0.45	0.01	0.73	0.57	0.58	0.01	1.82	0.15	0.15	0.35	0.04	0.72	0.7	0.95	-0.06	1.15
YKR092C_ORF	|| SRP40 || ribosome biogenesis and assembly* || molecular_function || YKR092C || Nopp140 homolog, a nonribosomal protein of the nucleolus and coiled bodies|nucleolar protein || 1450215	-1.05	-1.65		-1.34	-1.41	-0.8	-2.16	-0.74		-1.5	-2.08	-1.52	-2.08	-1.04	-0.62	-0.23	-0.55	-0.73	-1.82	-1.21	0.06	-0.55	-0.58	0.13	0.28	-1.94	-1.09	-0.79	-0.67	-0.67	-0.08	-1	-2.92	-1.17	-0.98	-0.66			-0.1	-0.62	-0.49	-1.1	-0.43	-0.71	-0.69
YHR074W_ORF	|| QNS1 || NAD biosynthetic process || hydrolase activity, acting on carbon-nitrogen (but not peptide) bonds, in linear amides* || YHR074W || glutamine-dependent NAD synthetase || 1450216	-0.65	-0.83	0.36	-0.22	-0.22	-0.93	-0.04	0.35		-1.21	-0.65	-1.94	-0.43	0.09	0.22	-0.39	-2.21	-0.59		-1	-0.11	-0.3	0.17	-0.82	-0.97	-1.13	-1.14	-1.04	-0.28	-1.02	-0.91	-2.17	-1.77	0.07		0.48	-1.56	-0.46	1.36	-0.77		-0.15	-1.22	-0.45	-0.82
TS(AGA)A_TRNA	|| || || || tS(AGA)A || YBOX_TRN1000059:TRN_TS(AGA)A_SGDID:S000006719_Chr_I_RC_tRNA_12 || 1450217	-0.17	1.66	0.93	1.24	1.19	-1.4	0.63	1.1		-1.61	1.29	0.22	-0.51	2.59	-0.63	0.3	-0.74	-1.23		1.23	-1.33	0.02	-0.81	-0.5	1.48	0.67	2.34	1.25	-0.42	0.12	0.5	-0.17	-0.26	-0.78	-5.19	-0.98		1.53	0.26	-0.13	0.55	-0.7	-0.11	-0.87	-0.64
IGR_CHR11:(62434..63434)_185	|| || || || || YBOX_IGR1000195:gKL02_6:gKL02_6:chr11.fsa:(62434..63434):1001:bp._185_0 || 1450218	1.14		2.06	2.17	2.15	0.69				1.77	3.27	-5.66	1.2			0.32	-0.07	0.79		1.89	0.84		1.07				2.63	-0.12	0.71	0.23			2.18	0.75				1.56	0.85			-0.05		0.97	0.01
YHR039C_ORF	|| MSC7 || meiotic recombination || molecular_function || YHR039C || Protein of unknown function, green fluorescent protein (GFP)-fusion protein localizes to the endoplasmic reticulum; msc7 mutants are defective in directing meiotic recombination events to homologous chromatids || 1450219	-0.34	-0.48		-0.73	-0.15	-1.01	-0.24	0.18		-0.92	-0.79	-1.72	0.44	-2.19	0.25	-0.7		-0.26		-1.24	0.15	-0.2	-0.28	-0.49	-1.82	-0.1	-0.36	-0.92	-0.45	-0.96	-0.47	-1.5	-0.18	-0.43	-2.18	-1.09				-0.81	-0.96	-0.02	-1.03	-0.34	0.4
YDR099W_ORF	|| BMH2 || sporulation (sensu Fungi)* || protein binding* || YDR099W || member of conserved eukaryotic 14-3-3 gene family || 1450220	-1.91	-3.42	-2.27	-1.4	-1.41	-0.17	-1.95	-1.9	-1.1	-1.73	-1.9	-1.57	-1.39	-2.23	0.14	-0.76	-1.94	-0.43	-2.69	-1.84	-0.15	-1.43	-1.1	0.17	-3.1	-2.19	-2.07	-1.66	-2.23	-1.47	-1.9	-1.92	-2.01	0.43		-2.09	0.05	-1.85	-2.43	-1.83	-0.54	-1.11	-0.6	-0.57	-0.97
YNL127W_ORF	|| FAR11 || cell cycle arrest in response to pheromone || molecular_function || YNL127W || Protein involved in G1 cell cycle arrest in response to pheromone, in a pathway different from the Far1p-dependent pathway; interacts with Far3p, Far7p, Far8p, Far9p, and Far10p || 1450222	-3.76	1.81	2.31	-1.35	-1.58	-0.93	-0.09	-1.44		-0.31	0.93	-1.37	0.43		-1.48	0.23		-0.22		-1.14	-0.1	-0.03	0.35	-1.23	-1.37	0.26	-0.64	-1.15	-1.49	-1.44	-0.26	-0.65	-2.75	0.29		-1.88		0.89	1.37	-0.94	-0.16	0.05	-2.43	-1.84	1.67
YOR389W_ORF	|| || biological_process || molecular_function || YOR389W || Hypothetical ORF || 1450223	1.02		1.01	0.7	0.16	-0.51	0.3						0.78			0.63	0.29	1.36		-0.24	-0.4	-0.03	0.5	-2.98	0.97	0.26	0.26	1.23	-1.25	-0.53	-1.14	1.82		-0.33		0.29			0.11	0.14	0.04	0.13	-1.06	-0.34	-0.28
YPR139C_ORF	|| VPS66 || protein targeting to vacuole || molecular_function || YPR139C || || 1450224	-0.5	0.65	-0.68	-0.81	-0.57	0.64	-0.58	1.11		-0.59	-0.29	-2.25	0.17	-0.47	-0.58	-1.03	-1.68	-0.89		-0.63	0.12	-0.39	-0.3	-0.51	-0.11	-1.08	-0.96	-0.63	0.14	-0.61	-0.39	-0.63	-0.93	-0.61	-2.38	-0.99	-0.99	0.8	-0.05	-0.23	-0.04	-0.14	-0.18	-0.5	-0.4
IGR_CHR11:(COMPLEMENT(184803..185013))_122	|| || || || || YBOX_IGR1000081:NKL022C:NKL022C:chr11.fsa:(complement(184803..185013)):211:bp._122_0 || 1450225	0.5		0.01	-0.13	-1.14	0.66	0.18	0.67	-4.97	0.47	0.2	-2.7	1.64	1.19	0.38	-0.53	-0.81	0.23		-0.25	0.15	0.3	1.14	0.85	1.34	0.72	-0.36	0.46	-0.28	0.69	-0.2	-0.6	-0.51	0.09		0.91	-1.38	2.17	0.63	0.61	-0.42	0.21	1.02	0.77	0.52
YFL062W_ORF	|| COS4 || biological_process || molecular_function || YFL062W || Protein of unknown function, member of a family of conserved, often subtelomerically-encoded proteins || 1450226	-0.01	0.25	-3.54	-0.27	-0.8	-0.6	0.29	-0.34	-1.92	-0.76	-0.18	-2.97	-0.09	0.61	1.14	1.11	-0.36	-0.01		-0.3	0.6	0.04	-1.51	0.24	-0.42	-0.83	-0.23	-0.11	-0.06	0.09	-0.55	-0.62	-1.71	-0.48	-2.37	-0.84	0.23	0.42	-0.85	0.01	-0.01	-0.15	0.05	-0.49	-0.11
YLR087C_TIL_15_0_US300_ORF	|| CSF1 || fermentation || molecular_function || YLR087C || YBOX_TIL1000210:TIL_US300_YLR087C_15_0 || 1450227	2.29			1.02																														-0.29
YFL027C_ORF	|| GYP8 || vesicle-mediated transport || Rab GTPase activator activity || YFL027C || GTPase-activating protein || 1450228	0.41	2.17		-0.23	0.61	-0.39	0.79	1.59		-1.4	1.34	-2.88	0.49			0.65	0.41	-0.46		-0.15	-0.08	0.68	-0.01	-0.24	1.23	-0.52	-1.13	1.08	-0.32	-1.84	0.78	0.42	0.66	-0.53		-1.04		0.96	0.77	-0.97	0.57	0.47	0.11	-1.51	-0.17
IGR_CHR16:(451336..451904)_268	|| || || || || YBOX_IGR1000239:gPL08_5:gPL08_5:chr16.fsa:(451336..451904):569:bp._268_0 || 1450229	0.58		3.33	0.89	1.1	0.77				1.26	2.05	-2.05	0.54	2.04		1.08	0.98	1.75		0.69	0.51		0.53			2.66	2.34	-0.74	0.73	-0.78	2.41	0.16	0.77	0.74		-0.52		2.77	0.85	1.7	1.08	0.99	1.69	1.37	1.61
TP(AGG)C_TRNA	|| SUF2 || || || tP(AGG)C || YBOX_TRN1000032:TRN_TP(AGG)C_SUF2_SGDID:S000006678_Chr_III_RC_tRNA_2 || 1450230	-0.19	1.47	2.29	2.35	1.84	-0.76	-0.51	2.85		0.15	2.12	0.57	1.09	0.51	-0.71	0.94	-0.27	0.53	-0.08	2.07	-0.43	-0.05	-0.18	-0.24	1.7	1.11	2.16	0.89	0.65	1.6	1.8	2.75	3.5	0.24		-0.63	-0.17	0.44	0.86	-0.08	-0.07	-1.09	0.8	0.1	-1.1
YGR289C_ORF	|| MAL11 || alpha-glucoside transport* || alpha-glucoside:hydrogen symporter activity* || YGR289C || alpha-glucoside transporter|hexose transporter|maltose permease || 1450231	0.47	1.05	1.65	1.47	1.93	0.65	1.09	3.22		1.81	1.36	-1.46	1.06	2.27	0.49	0.47	0.82	1.26		2.04	0.57	0.55	1.34	-0.24	-0.12	2	2.31	0.11	1.27	-0.25	2.38	1.8	1.9	1.22		2.42		1.56	0.7	0.86	0.25	0.61	0.94	1.51	1.69
IGR_CHR02:(COMPLEMENT(373565..373736))_83	|| || || || || YBOX_IGR1000007:NBR015C:NBR015C:chr02.fsa:(complement(373565..373736)):172:bp._83_0 || 1450232								4.27		-0.01	5.14	-1.77				1.38	1.29	1.08				0.8				2.94	3.98	0.69						1.36		-1.24		-0.06	1.7		1.31	0.46	0.77	0.23	-0.02
YLR221C_ORF	|| RSA3 || ribosomal large subunit assembly and maintenance || molecular_function || YLR221C || RiboSome Assembly || 1450233	-1.06	-0.54	-1.41	-1.14	-1.16	-0.22	-1.13	-0.47		-0.03	-1.47	-1.84	1.37	-0.94	-1.56	-1.18	1	-0.61		-1.28	-0.06	-0.36	0.26	0.22	2.88	-1.37	-0.96	-1.82	-0.78	-0.28	-0.55	-0.31	-1.1	-0.05	-2.12	0.08		-0.77	1.31	-1.29	0	-0.69	-0.04	0.15	0.3
YNL162W_ORF	|| RPL42A || translation || structural constituent of ribosome || YNL162W || ribosomal protein L42A (YL27) (L41A) || 1450234	0.57	-0.72	-1.29	0.24	-0.48	-0.05	-1.64	-0.71	0.8	-0.64	-0.34	0.98	-0.5	-0.79	-0.5	-0.81	-0.71	-0.56	1.29	0.22	-0.36	0.43	0.11	0.36	2.9	-0.53	-0.36	0	-0.43	0.68	-0.27	-0.41	-0.69	-0.04	1.37	0.33	-0.2	-0.69	-0.46	0.24	0.46	-0.73	0.85	-0.63	0.2
YLR157W-A_ONO_ORF	|| || biological_process || molecular_function || YLR157W-D || YBOX_ONO1000076:YLR157W-A_YLR157W-A_SGDID:S0028677_Chr_XII_475765-475977_Unc_ORF_117 || 1450235	0.67	2.21	3.2	1.86	1.27	1.41		2.53		0.16	1.4	-0.67	-0.86	2.26	1.97	2.22	1.72	1.52		1.47	2.3	1.35	1.1	0.6	0.64	0.98	1.19	0.18	1.17	0.56	1.11	1.9	1.4	1.3		1.09	0.31	0.23	0.43	0.48	0.99	0.56		0.9	0.17
YPR174C_ORF	|| || biological_process || molecular_function || YPR174C || Protein of unknown function; green fluorescent protein (GFP)-fusion protein localizes to the nuclear periphery || 1450236	-0.1	-2	-0.97	-0.98	-0.55	-0.23	-0.18	0.23		-0.78	-0.4	-2.48	-0.94	1.88	-0.68	-0.05	-0.6	-0.41		-0.66	0.54	-0.1	-0.62	-0.14	1.82	0.5	-0.29	-0.42	-0.29	-1	-0.92	-0.01	-0.71	-0.3	-1.91	-0.41		1.11	0.64	-0.27	-0.28	-0.55	-0.47	-0.66	-0.82
YIR031C_ORF	|| DAL7 || allantoin catabolic process || malate synthase activity || YIR031C || malate synthase 2 || 1450237	0.32	2.2		-2.01	0.77	-0.3		1.83		-0.95	1.66	-7.28	0.49	1.65	-0.31	0.13		0.09		-0.03	0.46		0.17		-0.17	1.46	1.04	-2.77	0.57	-1.44	0.5		-0.01					0.06		0.82		0.83	-0.43	0.67	0.93
YFR013W_ORF	|| IOC3 || chromatin remodeling || protein binding || YFR013W || Iswi One Complex || 1450238	0.16	0.83		1.19	-0.56	-1.04	0.28	0.9		-0.37	0.06	-2.67	-2.54	-0.05	-0.91	-0.4	-0.84	0.17		-0.75	-0.81	-0.13	-0.3	-1.2	-0.87	1.02	-0.41	-0.07	-0.11	-0.76	0.53	0.52	1.79	-0.18		-1.61		0.76	-0.79	-0.83	-0.31	-0.15	-0.94	-0.65	-1.88
YKL109W_ORF	|| HAP4 || transcription* || transcriptional activator activity || YKL109W || transcriptional activator protein of CYC1 (component of HAP2/HAP3 heteromer) || 1450239	0.69	-0.38	-0.28	-0.05	0.69	0.22	-0.38	0.05	-4.1	-1.26	-3.14	-1.87	1.03	0.08	0.24	0.62	1.1	0.37		-0.2	0.95	-0.28	0.1	-0.27	-4.07	-0.61	0.5	-1.06	0.81	-0.02	-0.71	-0.15	-0.47	-0.29		0.02	-0.57	-1.23	-0.09	-0.84	0.47	-0.55	-0.26	0.02	-0.6
YNL300W_TIL_1_133__ORF	|| || biological_process || molecular_function || YNL300W || YBOX_TIL1000001:TIL_YNL300W_1_133 || 1450240	-0.59	2.38	3.76							1.87	3.12	-3.47	0.55		-1.32	-1.08				0.72		0.8	-0.04				1.68	-0.52	-1.26	-0.64	1.34	2.1	1.06			-0.95		0.82	0.71		0.47	0.62			1.49
YOR116C_TIL_1201_1500_230_ORF	|| RPO31 || transcription from RNA polymerase III promoter || DNA-directed RNA polymerase activity || YOR116C || YBOX_TIL1000295:TIL_YOR116C_1201_1500_230_0 || 1450241	-2.27	-1.03	-2.19	-1.6	-0.78	-2.15	-2.15	-1.47		-2.12	-1.39	-2.2	-1.03	-1.02	-1.42	-0.67	-0.94	-1.88		-1.99	-0.47	-0.47	-0.12	-2.6	-0.32	-2.52	-1.7	-1.67	-1.53	-1.08	-1.5	-1.49	-2.37	-1.49		-1.93		-0.45	-1.15	-1.18	-0.02	-1.45	-2.91	-1.03	-1.67
YLR199C_ORF	|| PBA1 || proteasome assembly || molecular_function || YLR199C || Hypothetical ORF || 1450242	-0.94	0.47		-0.9	-1.12	-0.39	0.13	0.39		0.08	-1.73	-2.42	-2.04		-0.17	0.35	-1.4	0.2		-0.81	-0.27	-0.6	-0.06	-0.33	-0.87	0.4	-0.78	-0.87	0.02	-0.47	-1.18	-1.52	-0.6	0.14		-0.03		1.53	-0.87	-0.84	-0.28	0.03	-1.21	0.25
YER056C_ORF	|| FCY2 || purine transport* || cytosine-purine permease activity* || YER056C || purine-cytosine permease || 1450243	0.44	0.17	-1.5	-0.53	-0.94	-1.12	-1.03	0.35	-2.49	-1.01	0.04	-1.52	0.55	0.62	-1.11	1.1	0.55	0.12	-1.03	0.16	0.78	0.43	0.25	-0.06	1.42	-0.54	-0.36	-0.08	0.18	0.21	-0.51	-0.85	-1.29	-0.67	-0.37	-0.22		-0.07	-0.13	0.14	-0.68	-0.18	-0.02	-0.34	-0.26
CEN13_CEN	|| CEN13 || || || CEN13 || CEN13_CEN13_chr13.fsa_(268031..268149)_119_bp._46:YBOX_ACM1000026 || 1450244	-0.4		-0.1		1.92	-0.07	1.53			0.7	2.59	-2.95	0.65		-1.52	-0.92	-1.42	-1.78			-1.78	1.43	-1.61		-1.76	2.25	1.1	0.21	-0.06	-1.5		1.6	-0.1	-0.96		-0.66		1.2	-0.15			0.71	-1.61	-0.49	0.64
YBR038W_ORF	|| CHS2 || cytokinesis* || chitin synthase activity || YBR038W || chitin synthase 2 || 1450245	-1.42			-0.75	-1.11	-0.62	1.08	1.49		-0.38	-1.36	-2.21	0.13	0.71	-0.76	-0.64	-0.03	-0.76		-0.34	-0.78	-0.44	-0.29	-1.51	-2.8	1.27	-0.43	-0.33	-0.7	-1.4	-1.33	-0.01	-1.18	-2		-1.35		0.74	-2.13	-0.99	-0.6	0.29	-1.71	0.33	-1.49
YCL009C_ORF	|| ILV6 || branched chain family amino acid biosynthetic process || enzyme regulator activity* || YCL009C || Regulatory subunit of acetolactate synthase, which catalyzes the first step of branched-chain amino acid biosynthesis; enhances activity of the Ilv2p catalytic subunit, localizes to mitochondria || 1450246	-1.1	-1.86	-1.58	0.4	-0.84	0.45	-0.34	-1.74	-0.28	-0.88	-1.99	-0.65	-0.41	-0.91	1.13	-0.17	-0.22	0.59	-0.51	-0.93	1.23	-0.38	-0.17	0.78	-1.61	-1.83	-1.23	-0.96	-0.85	-0.18	-1.08	-1.58	-1.06	0.46	0.73	0.12	-0.43	-0.48	-0.64	-1.07	-0.01	-0.07	-0.18	0.23	-0.42
YFR012W-A_ORF	|| || biological_process || molecular_function || YFR012W-A || Hypothetical ORF identified by homology. See FEBS Letters [2000] 487:31-36. || 1450247	0.77	3.14	1.8		1.16			2.93		0.81	3.29	-2.83	1.13			-0.46	-0.5	0.13		0.58	-0.92		0.28		0.34		2.72	0.74	0.56	-0.27	3.03	1.4	0.53	0.33		0.1		1.94	0.72	1.32		0.44		-0.21	1.67
YBL087C_ORF	|| RPL23A || translation || structural constituent of ribosome || YBL087C || ribosomal protein L23A (L17aA) (YL32) || 1450248	0.59	-0.87	-1.61	-0.21	-0.52	0.21	-1.55	-0.9	1.47	-0.29	-0.41	1.33	-0.13	-1.3	0.94	-0.36	-0.82	0.17	0.95	0.2	0.26	-0.02	-0.54	0.75	0.04	-0.73	-0.11	-0.32	-0.54	0.18	-0.4	-0.12	-0.88	0.25	0.67	0.64	-0.4	-0.64	-0.97	0.06	0.36	-0.31	0.99	0.24	0.1
YDL048C_TIL_9_0_DS300_ORF	|| STP4 || biological_process || molecular_function || YDL048C || YBOX_TIL1000187:TIL_DS300_YDL048C_9_0 || 1450249										1.71		-1.6	-0.35										0.66		0.4											1.53		0.98				0.5			-0.02
YMR191W_ORF	|| SPG5 || biological_process || molecular_function || YMR191W || Protein required for survival at high temperature during stationary phase || 1450250	0.61	-0.92	1.75	-0.61	0.18	-0.27	0.02	0.85		0.32	-0.03		1.1	2.49	0.66	0.14	0.54	-0.04		-0.44	0.21	-0.66	-1.13	0.25	-1.8	0.69	-1.37	-0.35		-0.7	-0.33	1.6	-1.3	-0.46		-0.92	0.39		1.12	0.06	0.02	-0.02		-2.61	-0.36
YDL001W_ORF	|| RMD1 || biological_process || molecular_function || YDL001W || Required for Meiotic Division || 1450251	-0.95	-0.13	1.38	-1.03	-0.66	-0.62	0.66	1.07	-1.03	-0.97	-2.88	-2.86		-0.2	-1.16	-1.22		-0.15		-0.46	0.05	0.42	-0.94	-0.88	0.4	3.45	-0.24	-0.41	-1.16	-1.54	-0.76	0.14	-1.08	0	-1.26	0.03		0.79	0.77	-0.89	-0.09	0.29	0.3	0.25	0.81
YMR156C_ORF	|| TPP1 || DNA repair || polynucleotide 3'-phosphatase activity || YMR156C || DNA 3' phosphatase || 1450252	0.8	0.84	1.76	-0.08	-0.11	-0.2	0.21	0.61		0.08	0.52	-1.04	-0.77	0.95	0.14	0.12		-0.2		0.01	0.2	-0.02	0.3	0.1	-0.79	2.22	1.19	-0.08	0.2	0.2	0.6	0.59	0.23	0.52	-0.88	-0.33	-1.5	0.72	0.4	0.85	0.51	-0.1	0.26	-0.26	0.66
YER091C_ORF	|| MET6 || methionine biosynthetic process || 5-methyltetrahydropteroyltriglutamate-homocysteine S-methyltransferase activity || YER091C || vitamin B12-(cobalamin)-independent isozyme of methionine synthase (also called N5-methyltetrahydrofolate homocysteine methyltransferase or 5-methyltetrahydropteroyl triglutamate homocysteine methyltransferase) || 1450254	-1.73	-1.07	-0.43	-1.69	-1.56	-0.62	-1.62	-0.04	-2.34	-1.59	-0.27	-0.52	-1.11	-1.67	0.06	0.01	-1.06	-0.95	-1.1	-0.81	-1.55	-1.21	-0.82	-0.1	-3.23	-2.19	-0.72	-0.73	-1.19	-0.67	-1.44	-0.5	0.42	-0.63	-1.45	-1.63		0.55	0.13	-0.27	-1.26	-1.34	-0.4	-0.73	-1.56
YJL187C_ORF	|| SWE1 || regulation of cell size* || protein kinase activity || YJL187C || tyrosine kinase || 1450255	-0.07	-1.41	2.53	-0.54	-1.27	-0.17	-0.74	1.2		-0.64	1.62	-2.61	-2.35	-0.82	-0.02			-0.09		-0.98	-0.09	-0.16	1.09	-0.86	-0.1	0.95	-1.89		-1.27	-0.92	-0.56	-2.8			-1.35	-1.32				0.03	-0.7	-0.79	-0.41	-0.98
YDR478W_ORF	|| SNM1 || rRNA processing* || RNA binding* || YDR478W || Has roles in both mitochondrial DNA replication and nuclear 5.8S rRNA processing. || 1450257	0.34	0.38	1.34	-0.02	-0.35	-0.09	0.68	1.08		-0.06	1.18	-2.44		1.97	-0.83	-1.09		0.07		0.12	0.41	0.6	-0.24	0.23	1.66	0.06	-0.07	-0.31	0.49	-0.04	0.17	-0.32	-2.46	0.94		-0.59		1.19	1.46	1.18	0.86	0.06	0.21	-0.23	1.13
YCL044C_ORF	|| MGR1 || mitochondrial genome maintenance || molecular_function || YCL044C || Hypothetical ORF || 1450258	-0.89	-0.57	-0.43	0.33	0.22	0.17	1.08	-1.45		-0.89	-0.05	-2.75	0.25	1.08	-0.72	-0.86	-0.98	-0.83		-0.31	0.43	-0.34	0.23	-0.87	-2.52	-0.94	-0.81		-0.71	-0.84	-0.86	-0.8	-1.46	0.48		-1.02		0.11	1.58	-0.26	0.62	0.2	-1.15	0.24	-0.32
YGL169W_ORF	|| SUA5 || aerobic respiration || molecular_function || YGL169W || Protein involved in translation initiation || 1450259	0.83	1.11	3.32	0.83	0.46	0.68	0.32	1.55		1.33	1.97	-2.15	0.43	-0.7	-0.04	1.24		0.85		0.66	-0.24	0.49	0.73	0.3	1.53	1.07	1.01	0.49	0.66	0.19	1.45	1.46	1.15	0.8	0.2	1.61		0.95	0.47	0.87	0.19	0.12	0.36	0.34	1.33
YGL178W_INT_1	|| MPT5 || cell wall organization and biogenesis* || mRNA binding || YGL178W || YBOX_INT1000139:INT_1_YGL178W:NC_001139:167361..168000 || 1450260	-0.7	-0.42	0.8	0.01	0.55	-0.39	-0.26	0.05		-0.47	-0.03	-1	0.28	0.69	0.51	0.69	1.53	-0.21		-0.06	0.45	0.8	0.12	0.56	-1.95	0.02	-0.71	0.67	0.1	0.28	-0.31	-0.28	-0.37	-0.24	0.46	-0.58		1.95	1.45	-0.1	-0.58	-0.5	0.18	-0.56	0.4
YPL054W_ORF	|| LEE1 || biological_process || molecular_function || YPL054W || Product of gene unknown || 1450261	1.63	1.48	-0.96	0.69	0.19	0.52				-0.41	1.13	-3.87		2.67	-0.01	1.04	0.81	1.22		0.89		-0.32	0.72	-4.9	-1.45	0.46	1.85		1.13	0.04	-0.03	0.88		0.74		-0.56	-1.67	1.75	1.73	-0.59	0.61	-0.27	-1.15	1.84	0.21
YNL334C_ORF	|| SNO2 || thiamin biosynthetic process* || molecular_function || YNL334C || Protein of unknown function, nearly identical to Sno3p; expression is induced before the diauxic shift and also in the absence of thiamin || 1450262	0.92	-0.78	1.59	0.4	0.77		1.49	3.19		1.16	0.34			1.52	1.16		2.46			1.04		1		-0.38	1.49		0.81	0.66		0.67	-0.49					-0.3			1.64	1.17	0.41	0.33	0.12	0.53	0.42
YBL003C_OCH_DS100_ORF	|| HTA2 || DNA repair* || DNA binding || YBL003C || YBOX_OCH1000124:DS100_YBL003C_YBL003C_Chr02_(complement(235297..235396))_100_bp._10_0 || 1450263	0.01	-1.01	-1.28	0.59	-0.71	0.16	-1.62	-1.34	0.28	-0.06	-0.73	-0.87	-0.22	-1.47	-0.15	-1.04	-0.96	0.23	0.12	0.24	-0.35	-0.17	-0.49	0.2	0.05	-1.23	-0.29	-0.26		0.24	-1.04	-0.93	-0.55	0.14	0.71	-0.58	-0.29	-0.32	-0.07	0.16	0.24	-0.95	0.47	-0.59	0.03
YDR500C_ORF	|| RPL37B || translation || structural constituent of ribosome || YDR500C || ribosomal protein L37B (L43) (YL35) || 1450264	1.01	-0.89	0.05	-0.04	-0.14	0.3	-1.13	-0.45	0.87	0.36	-0.4	1.62	-0.27	-0.93	-0.53	-0.14	-1.2	0.33	1.09	0.62	0.26	0.81	0.41	0.91	0.61	-0.68	0.42	0.25	0.29	0.72	-0.04	0.05	-0.07	0.52	1.01	1.64	-0.27	-0.53	-0.6	0.28	0.33	-0.5	0.96	0.54	0.5
YNL130C_JXN_EI_1_ORF	|| CPT1 || phosphatidylcholine biosynthetic process || diacylglycerol cholinephosphotransferase activity || YNL130C || YBOX_JXN1000003:JXN_EI_1_YNL130C:NC_001146:complement(380742..380821) || 1450265	-0.16	-0.73		0.5	-0.76	0.33		0.14		0.58	-1.27	-1.17	-0.13		1.89	0.17	0.68			0.45	0.6	0.62	0.92	-0.59	-0.33	1.99	0.92	0.31	0.14	0.28	-1.4	-1.78	0.08	0.11	-1.59	-0.42		1.56		0.8	-0.36	0.32	0.58	-0.61	0.02
SNR34_SNORNA	|| SNR34 || || || snR34 || YBOX_SNO1000035:SNO_SNR34_SNR34_SGDID:S000006500_Chr_XII_snoRNA_187 || 1450267	-1.57	2	3.38	4.33	3.59	-1.59	-1.15	3	-0.94	-2.14	2.86	4.78	2.63	2.99	-0.36	2.14	0.66	-1.75	0.64	1.79	-1.72	0.61	-2.47	-0.73	0.2	1.47	2.61	1.88	1.35	1.32	0.35	1.99	1.05	-1.57	-1.86	-1.63	0.18	2.09	-0.83	1.33	0.5	0.21	0.13	-1.26	-2.08
YBL071C-B_ONO_ORF	|| || biological_process || molecular_function || YBL071C-B || YBOX_ONO1000007:YBL071C-B_YBL071C-B_SGDID:S0028597_Chr_II_89554-89456_RC_Unc_ORF_2 || 1450268		2.58			0.79						1.24				-0.59		0.12			-1.25		2.82			1.36	3.09		-2	-0.63	-1.53	0.57	2.91		-0.27		0.16			-0.29			1.19
YKL144C_ORF	|| RPC25 || transcription from RNA polymerase III promoter || DNA-directed RNA polymerase activity || YKL144C || RNA polymerase III subunit || 1450269	-0.76	0.22	0.84	-0.66	-0.89	-0.07	-0.59	-0.61		0.59	2.74		0.57	1.28		-0.62	-1.33	-0.31		0.18	0.04	-0.14	-1.81	0.36	2.2	1.58	-0.5	-0.12	-0.25	-0.12	-0.28	0.5	-0.83	-0.59	-1.25	0.21		1.46	0.03	0.59	-0.37	-0.37	-0.03	-0.36	0.37
YPL019C_ORF	|| VTC3 || vacuole fusion, non-autophagic || molecular_function || YPL019C || polyphosphate synthetase (putative) || 1450270	-0.7	-1.21	-2.76	-2.61	-1.36	-1.55	-2.27	-1.67	-1.92	-1.36	-1.38	-1.91	-0.84	-0.75	-0.4	-0.73	-1.06	-0.8	-1.54	-1.51	-0.36	-1.17	-1.52	-0.57	-0.95	-1.66	-1.9	-1.42	-1.91	-2.02	-1.5	-1.47	-0.88	-1.59	-3.02	-1.41	-3.16	-0.06	-3.01	-1.27	-1.28	-1.3	-1.21	-0.91	-1.21
YOL097C_ORF	|| WRS1 || tryptophanyl-tRNA aminoacylation || tryptophan-tRNA ligase activity || YOL097C || tryptophan-tRNA ligase || 1450271	-2.32	-0.47	2.39	-1.67	-1.51	-0.67	-2.18	-1.3	-1.48	-0.78	-0.72	-2.28	-0.08	-0.28	-0.3	-0.69	-0.98	-0.58	-0.97	-1.06	-0.4	-0.94	-0.7	-0.07	1.29	-2.94	-1.85	-0.21	-0.3	-0.61	-1.37	-0.79	-1.35	-1.17	-2.73	-1.93	-4.01	-1.41	-2.82	-1.07	-0.99	-0.97	-0.75	-1.11	-0.47
YMR251W-A_ORF	|| HOR7 || response to stress || molecular_function || YMR251W-A || hyperosmolarity-responsive gene || 1450272	0.03	-1.34	-0.92	-0.07	-0.21	0.7	-1.1	-0.74	1.38	0.09	-0.34	0.53	-0.85	-0.64	0.55	0.16	0.18	0.28	1.16	0.27	0.31	0.48	-0.05	1.09	-1.47	-0.61	0.13	-0.22	-0.35	0.31	-0.06	-0.85	-1.01	0.16	0.73	-0.16	1.95	-1.09	-0.82	0.36	0.4	-0.5	1	0.21	0.39
YPL226W_ORF	|| NEW1 || ribosome biogenesis and assembly || ATPase activity* || YPL226W || This gene encodes a protein with an Q/N-rich amino terminal domain that acts as a prion, termed [NU]+. || 1450273	-2.13	-1.5	-2.7	-1.65	-1.7	-0.54	-1.41	-0.64		-1.38	-0.94	-0.68	-2.26	-1.07	-0.71	-0.6	-1.34	-1		-1.39	-0.35	-1.34	-0.46	-1.51	0.29	-1.07	-1.01	-1.01	-0.89	-1.81	-1.47	-1.21	-2.23	-1.41		-1.81		-1.83	-1.58	-1.38	-1.88	-1.77	-1.78	-1.21	-1.67
YOR083W_ORF	|| WHI5 || G1/S transition of mitotic cell cycle* || specific transcriptional repressor activity || YOR083W || function unknown || 1450274	0.27	1.07	2.75	1.12	0.88	1.02	-0.41	1.81		0.6	1.06	-1.08	1.12	0.91	0.88	0.4	2.69	0.79		0.64	0.37	0.08	1.42	-0.08	1.25	1.21	0.72	0.53	0.71	0.8	1.67	0.41	1.36	1.13	0.03	0.79		1.47	0.87	0.81	0.15	-0.31	0.83	0.65	-0.42
YML036W_ORF	|| CGI121 || telomere maintenance* || molecular_function || YML036W || Hypothetical ORF || 1450275	0.61	0.26	2.52	-1.21	-0.87	0.71	-0.32	1.98		-1.92	1.81	-1.91		0.78	-0.89	-0.33	-1.13			-0.34		-0.2	0.58	-0.27	0.4	0.99		-5.16	0.33	-0.86	-0.47	1.14	-0.37	-0.33		-0.63		2.02	0.44		0.57	-0.3	-0.21	-0.01	-0.38
YCR030C_ORF	|| SYP1 || biological_process || molecular_function || YCR030C || Suppressor of Yeast Profilin deletion || 1450277	0.08	1.17	2.24	1.49	1.35	0.25	-0.32	2.38	-3.32	0.37	0.64	-1.06	0.69	-0.13	-1.05	0.33	-0.46	0.28		0.38	-0.04	-1.77	0.35	-0.93	-1.99	0.92	0.97	-0.59	0.99	-1.22	1.26	1.58	0.96	0.82		1.18	-6.11	-0.38	0.07	-0.4	-1.08	0.07		0.94	-1.51
YOR048C_ORF	|| RAT1 || 35S primary transcript processing* || 5'-3' exoribonuclease activity || YOR048C || 5'-3' exoribonuclease || 1450278	-0.64			-1.28	-1.66	-1.58	-1.83	-1.95	-3.31	-3	-2.73		1.49	-0.62	-3.89	-0.82	-0.56	0.56		-0.28	-0.68	-0.44	-0.4	-1.57	0.03	-1.81	-1.2	-1.37	-2.11	-1.29	-1.51	-3.47	-0.69	-1.56		-2		-2.39	0.08	-1.37	-1.24	-1.67	-1.78	-1.25	-0.45
YGR155W_ORF	|| CYS4 || response to drug* || cystathionine beta-synthase activity || YGR155W || cystathionine beta-synthase || 1450279	-1.96	0.44	-1.59	-1.2	-1.89	-1.22	-2.2	-1.74	-1.85	-1.33	-1.45	-1.34	-0.82	-0.3	0	-1.09	0.22	-0.95	-1.58	-1.22	-0.19	-1.07	-0.85	-0.91	-1.89	-2.34	-1.34	-1.56	-1.32	-0.23	-1.38	-1.99	-0.93	-2	-4.32	-1.9	0.08	-1.89	-1.58	-1.74	-1.86	-1.13	-1.19	-0.98	-1.26
YBR245C_ORF	|| ISW1 || chromatin remodeling* || ATPase activity || YBR245C || ATPase component of a four subunit chromatin remodeling complex || 1450280	-1.15	-0.64	0.48	-2.54	-2.21	-1.87	0.07			1.03	-0.88	-2.05	0.09	-0.12	-1.85	-0.87		-0.7		-2.47	-1.57	-0.84	-0.49	-0.74	0.2	-2.57	-1.93	-2.35	-3.16	-2.12	0.33	-0.55	-0.79	-0.53	-1.85	-1.29		0.22	1.1	-1.56	0.17	-0.05	-1.02	-1.01	-0.66
YPR040W_ORF	|| TIP41 || signal transduction || molecular_function || YPR040W || SDF1 the first obserwed null phenotype was Sporulation DeFiciency || 1450282	-0.01	0.59	1.76	-0.06	0.06	-0.16	0.42	2.17		-0.22	0.33	-1.32		0.99	-0.99	-1.84	2.15	0.67		0.01	-0.1	-0.05	0.27	0.48	-1.66	0.2	-0.37	-0.47	-0.36	-0.32	0.37	1.25	1.5	0.1		0.48	-2.15	1.89	0.68	0.41	-0.36	-0.02	0.06	0.21	0.73
YPR005C_ORF	|| HAL1 || positive regulation of transcription from RNA polymerase II promoter* || molecular_function || YPR005C || polar 32 kDa cytoplasmic protein || 1450283	0.05	2.75		0.36	1.75	0.67	1.18	2.53		0.79	0.6	-3.63	0.31		0.33	0.7	0.09	0.11	-2.35	0.86		0.73	0.25	0.32	-0.97	1.56	0.89	-0.03	0.61	-0.86	0.37	-0.73	0.64	0.41		-0.97	-0.45	1.51	0.41	0.54	0.23	0.47	0.09	0.27	0.6
YOR255W_ORF	|| OSW1 || sporulation (sensu Fungi)* || molecular_function || YOR255W || Outer Spore Wall || 1450284				-2.18			1.9											1.36															1.89						-0.15			-0.25
YIL022W_TIL_301_600_203_ORF	|| TIM44 || protein import into mitochondrial matrix || protein transporter activity || YIL022W || YBOX_TIL1000257:TIL_YIL022W_301_600_203_0 || 1450285	0.53	0.08	-0.42	0.45	-0.2	-0.83	-0.51	-2.07	-1.51	-0.4	-0.69	-0.9	0.46	0.07	0.74	1.03	1.23	-0.49	-2.67	-0.33	0.84	0.05	0.4	0.19	1.08	0.28	-0.73	-0.46	0.54	0.06	-0.76	-0.85	0.47	-0.35		0.19		0.69	0.59	-0.52	-0.32	-0.24	-0.24	-0.19	-0.24
IGX_YG_851380C	|| || || || || YBOX_IGX1000009:IGX_221_21:IGX_YG_851380C:[chromosome=VII]:(complement(851305..851405)) || 1450286	-1.51		-1.66	-0.85	-1.47	-0.35	-1.3	0.04		-0.63	-0.92	-2.68	0.1	-1.34	-0.44	-0.5	-0.84	0.53		-1.33	0.82	-0.76	0	-0.79	0.71	-0.1	-1.45	-1.3	-1.01	-0.95	-0.82	-1.66	-1.76	-0.94		-1.41	-2.21	0.31	-0.74	-1.63	-1.28	-0.46		-0.59	-0.57
YBR280C_ORF	|| SAF1 || proteasomal ubiquitin-dependent protein catabolic process || molecular_function || YBR280C || Hypothetical ORF || 1450287	1.09	2.78	1.62	0.18		-0.59	1.17	2.76		0.42	2.38	-4.53	0.54	1.78	-0.53	-0.12	-0.26	-0.19		-0.64	-1.25	0.88	0.2		-1.34	2.29	1	-0.74	0.66	-0.78	0.93	1.51	1.21	-3.03		-0.81	-2.21	1.64	0.2	0.05	-0.25	0.31	-0.08	0.92	0.04
YBR162C_TIL_7_105__ORF	|| TOS1 || response to drug || molecular_function || YBR162C || YBOX_TIL1000046:TIL_YBR162C_TOS1_7_105 || 1450288	0.19	0.26	-2.27	1.05	1.25	0.54	-1.29	-0.34	-5.88	0.33	-0.27	-0.89	1.32	-0.09	0.55	0.14	0.79	0.74		0.22	1.25	-0.09	1.57	0.29	-1.03	0.88	-0.04	-0.18	0.59	0.84	0.32	-0.11	1.27	1.94	-2.62	1.82	-0.77	1.52	1.35	0.28	-0.2	-0.59	-0.28	0.91	0.34
YDR137W_ORF	|| RGP1 || retrograde transport, endosome to Golgi || guanyl-nucleotide exchange factor activity || YDR137W || Ric1p-Rgp1p is an exchange factor, and peripheral membrane protein complex restricted to the Golgi. || 1450289	-0.88	0.88	-0.38	0.61	0.01	-0.17	-0.32	1.5		3.63	-0.07	-2.96	0.8	0.42	-1.42	0.38	-0.26	-1.19		-0.01	-0.11	-0.27	0.56	-0.12	-1.2	0.23	-1.26	-0.32	-0.28	-1.72	-0.18	1.56	0.13	-0.45		1.21		1.34	-0.17	-1.16	-0.41	0.16	-0.48	-0.78	0.47
YPL261C_ORF	|| || || || YPL261C || Hypothetical ORF || 1450290	1.53			1.92	0.67					-0.67						-0.16		-0.09				0.78	1.4	-2.99				0.12		0.29	1.44			0.62		-0.21						0.16	-1.93		1.1
YMR022W_ORF	|| QRI8 || ER-associated protein catabolic process* || ubiquitin-protein ligase activity || YMR022W || ubiquitin-conjugating enzyme || 1450291	-0.21	-1.48	-0.92	-2.1	-0.63	0.55	-0.42	-0.34	0.11	-0.69	-0.57	-1.31	0.72	0.98	0.34	0.11	-0.78	0.11		0.04	0.31	-0.2	-0.48	0.86	-0.3	-0.39	0.05	0.18	0.7	-0.55	-0.64	0.33	-0.24	0.2		-0.57	-0.39	1.41	-0.36	-0.18	-0.11	-0.1	0.51	-0.27	0.27
YML071C_ORF	|| COG8 || intra-Golgi vesicle-mediated transport || molecular_function || YML071C || Conserved Oligomeric Golgi complex 8 dependent on RIC1 || 1450292	0.47	0.71	1.49	0.83	0.3	0.99	-0.41	1.16		-0.44	0.14	-1.67	0.88	-0.68	-1.25	-1.18	-0.65	-0.05		0.46	0.33	-0.21	-0.83	-1	0.83	-0.55	-0.17	-0.1	-0.61	0.41	0.04	1.19	0.44	0.59		-1.13		0.96	0.17	-0.71	-0.24	-0.33	-0.54	0.66	-1
YHR112C_ORF	|| || sulfur metabolic process || cystathionine beta-lyase activity || YHR112C || Hypothetical ORF || 1450293	0.64		0.49	0.21	-0.46	-0.56	0.19	0.47		0.12	0.44	-3.01	0.17	1.47	-0.42	0.03	0.88	0		-0.45	-0.14	0.48	-0.8	-0.35	-1.45	-0.34	-2.51	-1.03	-0.98	-1.29	-0.88	-0.29		-0.95		-1.57	-1.11	0.73	1.08	-0.89	-0.09	-0.52	-0.69	0.91	0.57
YLR237W_ORF	|| THI7 || thiamin transport || thiamin transporter activity || YLR237W || thiamine transporter || 1450294	-0.43	0.31	-1.38		-1.26	-0.58	0.89	-0.12		-1.01	0.97			1.57	0.6	1.18	-0.23	-0.5		-0.61		0.19		-3.75	-1.09	-0.69	-2.54	-0.53	-1.74	-0.06	-3.35	0.89		-0.88		-1.71		-1.09	0.97	-0.15	-0.43	0.03	-1.07	-1.12	-1.24
YJL053W_ORF	|| PEP8 || protein retention in Golgi* || protein transporter activity || YJL053W || vacuolar protein similar to mouse gene H58 || 1450295	-0.15	-1.39	1.23	0.57	0.03	-0.03	0.76	1.03		0.25	0.2	-2.52	0.13	1.89	-0.37	-0.51	0.08	0.23		-0.2	0.04	0.29	0.23	0.01	-1.21	0.94	-0.22	-0.54	-0.71	-0.71	-0.44	0.13	0.4	-0.78		-0.71	-0.13	1.55	0.16	-0.17	-0.12	0.33	-0.76	0.09	0
YGR190C_ORF	|| || || || YGR190C || Protein required for cell viability || 1450296	-0.66			1.09	2.35		1.72				0.56	-2.26			-1.28	0.52		-0.58		1.03			1.04				2.54	-0.06	1.34	0.85			0.32			0.76		1.93	1.71			1.11	-0.83
YLR065C_ORF	|| || biological_process || molecular_function || YLR065C || Hypothetical ORF || 1450297	-0.05	-3.11	1.78	-0.56	-0.46	-0.5	-0.52	0.01	-2.47	0.97	-0.41		-0.17	0.34	0.3	-0.1	-0.23	-0.2	-1.92	0.96	0.27	-0.03	-0.11	0.43	2.55	-0.48	0.15	-0.19	0.91	0.42	-0.03	-2.19	0.53	-0.22	-0.44	0.2		1.83	-0.44	-0.03	-0.19	0.01		-0.62	0.17
YIL096C_ORF	|| || ribosome biogenesis and assembly || molecular_function || YIL096C || Hypothetical ORF || 1450299	0.08	-1.02		-1.26	-0.07	-0.13		-0.32		-0.01	0.98	-2.03		-0.21	-1.37	-0.17		-0.72		-0.82	-0.16	0.36	-1.05	0.52	0.11	1.38	0.05	-0.44	-0.49	-0.85	-0.38	-0.26	0.3	-0.75	-0.81	-0.6		1.06			0.27	-0.21	-0.82	0.09
YBR111W-A_INT_1	|| SUS1 || positive regulation of transcription from RNA polymerase II promoter* || molecular_function || YBR111W-A || YBOX_INT1000225:INT_1_YBR111W-A:NC_001134:462204..462283 || 1450301	0.98		0.86		1.35	0.57				1.24		-2.14			-1.95		-0.52				-0.91	0.69			-1.87	1.4	1.65			-1.48			0.99	0.09		0.62		1.58	1.34		0.9	0.39	0.03
YPL218W_INT_1	|| SAR1 || ER to Golgi vesicle-mediated transport || GTPase activity || YPL218W || YBOX_INT1000047:INT_1_YPL218W:NC_001148:138725..138863 || 1450303	1.54		1.08				1.81	2.95		0.88	1.3	-2.18	0.74		0.38	1.11		0.99		0.32	-0.27	0.49	0.16	-0.5		1.53	0.76	1		-0.77	1.83	-0.54				1.17		2.32	0.94		0.61	-0.35	0.69	0.43	0.96
YBR062C_INT_1	|| || biological_process || molecular_function || YBR062C || YBOX_INT1000187:INT_1_YBR062C:NC_001134:complement(366501..366582) || 1450304	0.21				0.61					-0.24	2.37			1.96	-1.19			0.73		0.01		0.48			1.54			0.36		-0.81						-0.59		-0.85	1.85	0.35	0.71	0.43	-0.14
TAG_MBP_PTWIN-MBP1_MARKER	|| || || || || YBOX_TAG1000019:TAG_14:TAGS_Maltose:Binding:Protein:(malE):(NEB:Plasmid:pTWIN-MBP1,6403-7587)_1068 || 1450306	1.8	1.95	3.35	0.34	1.89	-1.42		4.83		1.33	3.9	-0.15	0.28	1.64	1.6	0.04	1.54	-0.71		3.61	-0.85		-0.19		1.72	3.97	4.86	1.18	1.95	0.28	5.62	2.77	1.11	-1.28		0.55		1	0.22	2.08		1.85		-1.03	2.01
YFR029W_ORF	|| PTR3 || response to amino acid stimulus || molecular_function || YFR029W || Regulator of expression of the PTR2, GAP1, and BAP2 genes; involved in the the control of peptide transport || 1450307	0.29	0.36	1.8	-0.52		-0.99	0.94	0.39		-0.89	0.01	-2.52	0.14	2.69	-0.39	2.53	1.79	-0.74		-0.2	-0.8	0.64	0.48	-3.27	-2.23	-0.61		0.42	-1.18	-2.36	-0.66	-1.89	0.53	-0.56		-0.84		1.5	0.86	-0.3	-0.05	-0.77	-2.39	-1.56	-0.05
YDR309C_ORF	|| GIC2 || establishment of cell polarity (sensu Fungi)* || small GTPase regulator activity || YDR309C || Gtpase-interacting component 2 || 1450308	-1.07	-0.93	-0.28	-0.72	-0.56	-0.5	0.07	-0.9		-0.97	-1.21	-2.15	0.18	-1.21	-0.73	-0.15	-1.11	-0.17		-1.98	-0.05	-0.6	-0.62	-0.6	-2.18	-1.96	-1.42	-0.73	-0.6	-0.55	-1.38		-0.77	0.43	-1.94	-1.61		-0.61	0.59	-0.32	-0.17	-0.5	-1.16	-0.82	-0.83
YNL200C_ORF	|| || biological_process || molecular_function || YNL200C || Hypothetical ORF; similarity to human TGR-CL10C, thyroidal receptor for N-acetylglucosamine || 1450309	-0.21	2.83	0.55	1.66	0.33	0.76	0.13	0.21		-0.49	-0.49	-3.42		2.25	1.1	0.58	0.26	0.75		0.53	0.86	0.05	0.52	0.28	-1.05	0.31	0.4	-0.04	0.66	0.42	-0.81		0.14	0.73		0.54	0.53	2.47	0.78	0.42	0.15	0.48	0.29	0.8	0.12
YKL010C_ORF	|| UFD4 || protein monoubiquitination* || ubiquitin-protein ligase activity || YKL010C || ubiquitin ligase e3 || 1450310	-2.01	0.51		-1.75	1.22	-1.87	-0.24	-0.47		-1.31	0.26	-2.58	-0.56	-1.7	-1.33	-0.79	1.78	-0.56		-1.97	-1.03	-0.47	-1.49	-1.86	-0.98	-0.78	-0.82	-1.01	-1.32	-1.5	-0.03	0.05	-0.45	0.35		-0.82		1.57	0.46	-1.04	-1.09	-0.08		-0.81	-0.31
YLR272C_ORF	|| YCS4 || mitotic sister chromatid segregation* || molecular_function || YLR272C || loss of cohesion || 1450311	-0.56	0.57	1.22	-0.9		-1.96		2.7		-0.5	-2.03	-2.11	0.18		-0.69	-0.5		-1.41		-0.85	-0.81	-0.72	0.06	-1.63	0.31	1.44	-2.05	-1.88	-0.62	-2.04	0.19	-0.41	0.53	-0.79	-6.28	0.28		2.21	0.9		-1.28	-0.58	-1.29	-1.07	-1.15
YJR004C_ORF	|| SAG1 || agglutination during conjugation with cellular fusion || cell adhesion molecule binding || YJR004C || alpha-agglutinin || 1450312	0.9	1.1		0.09	1.13	-1.35	0.91			0.91	1.72	0.61	1.26	-0.18	0.65	0.39		-0.41		1.53	0.21	2.29	0.24		-0.28	2.15	0.48	-0.03	0.03		0.84		1.03	0.56		0.82		0.58	-0.6	0.47	0.5	1.23		-0.15	1.59
YLR409C_ORF	|| UTP21 || ribosome biogenesis and assembly* || snoRNA binding || YLR409C || U3 snoRNP protein || 1450313	-2.78	-0.82	-2.28	-1.74	-2.14	-1.18	-2.41	-1.9		-1.18	-1.52	-1.21	-0.9	-1.51	-0.67	-0.49	-2.37	-0.65		-1.52	-0.23	-1.36	-0.61	-1.14	1.5	-0.45	-2.03	-1.8	-1.63	-1.52	-1.01	-1	-1.42	-1.31	-4.92	-1.89		0.53	-1.07	-1.27	-1.34	-1.21		-1.41	-0.32
YGL207W_ORF	|| SPT16 || RNA elongation from RNA polymerase II promoter* || RNA polymerase II transcription elongation factor activity* || YGL207W || Subunit of the heterodimeric FACT complex (Spt16p-Pob3p), facilitates RNA Polymerase II transcription elongation through nucleosomes by destabilizing and then reassembling nucleosome structure || 1450315	-1.37	-0.91	-0.35	-0.19	0.15	-1.34	-1.62	0.45	-1.73	-0.26	-0.94	-1.95	-0.44	-0.73	-0.99	-0.2	-1	-0.9		-0.83	-0.61	-1.19	0.16	-1.32	0.51	-0.74	-0.85	-1.41	-1.09	-1.27	-0.45	-0.32	-2	-0.57	-3.92	1.06		0.17	0.75	-1.1	-1.42	-0.99	-1.51	-0.59	0.6
YDR344C_ORF	|| || || || YDR344C || Hypothetical ORF || 1450316	-0.96	1.91	0.99	-0.64	-0.33	-0.39	1.19	1.07		-0.13	-1.54	-2.33	1.42		0.24	1	0.06	-0.31		0.37	0.48	0.58	-0.42		-1.53	2.44	-1.26	-1.08	-0.55	-0.68	-0.1	1.33		-0.39		0.07		1.57	-0.73	0.29	1.38	0.69	-0.61	0.04	-0.35
YBR111W-A_JXN_EI_1_ORF	|| SUS1 || positive regulation of transcription from RNA polymerase II promoter* || molecular_function || YBR111W-A || YBOX_JXN1000070:JXN_EI_1_YBR111W-A:NC_001134:462164..462243 || 1450317	0.18	0.62	1.13	-0.47	-0.14	0.03		1.04		0.24	2.02	-2.56	0.18		-0.61	0.23	-0.49	-0.32		-1.16	-0.51	1.74	-0.23	-1.56	-2.23	0.65	-0.82	-0.07	0.76	-0.29	-0.38	-0.64	-0.52	-0.14		0.28		-0.22	1.17	0.72	0.66	0.35	-0.2	0.41	0.26
YGL035C_ORF	|| MIG1 || negative regulation of transcription from RNA polymerase II promoter by glucose || specific transcriptional repressor activity* || YGL035C || C2H2 zinc finger protein that resembles the mammalian Egr and Wilms tumour proteins || 1450318	-0.19	0.89	0.08	2.32	-0.25	2.23	-0.13	0.98	1.64	1.72	1.21	0.53	1.13	1.19	0.73	0.83	0.49	1.08	2.48	1.91	1.62	-0.51	-0.19	1.45	-0.31	0.68	2.63	0.92	0.12	-0.35	2.36	1.58	-0.14	1.95	2.79	0.14	2.53	0.56	0.73	0.84	0.59	-0.29	2.58	1.03	0.54
YDL017W_ORF	|| CDC7 || protein amino acid phosphorylation* || protein serine/threonine kinase activity || YDL017W || Cdc7p-Dbf4p kinase complex catalytic subunit || 1450319	-0.13	2.06	0.87	2.26	0.38	-0.11	1.18	2		0.41	1.79	-1.12		0.65	-0.53	0.78	-0.22	0.77		1.29	-0.72	0.4	-0.28	-0.88	0.53	0.53	2.7	0.59	0.71	-0.64	2.87	1.67	0.99	-1.24	2.13	-1.31	3.44	1.63	0.54	-0.03	0.28	0.52	2.05	-1.57	-1.07
YBR089W_ORF	|| || || || YBR089W || Hypothetical ORF || 1450320	0.95		3.55				0.47	2.79			-1.42	-1.72			-0.43	0.11	0.24	0.79		0.12		0			0.65	0.18	-1.22	-1.33	1.12	-1.34	1.77	0.71		0.18		-0.96			0.77	1.14	0.66	1.26	0.59	1.18	1.91
IGR_CHR10:(171920..172694)_129	|| || || || || YBOX_IGR1000188:gJL03_6:gJL03_6:chr10.fsa:(171920..172694):775:bp._129_0 || 1450321	-0.66	2.73	2.05			1.67	1.14	1.08		1.44	-1.18	-2.04			0.4	1.69	2.82			0.6		1.44	1.59				2.97	-0.58	0.28	0.87	2.21	1	1.18	0.17		0.43		2.86	1.85		1.08	0.64		1.24	-0.08
YLR444C_ORF	|| || || || YLR444C || Hypothetical ORF || 1450322							-0.35			0.47			-0.18									0.4									1.37			0.95				2.63			0.29	-0.27			0.78
YOL135C_ORF	|| MED7 || transcription from RNA polymerase II promoter || RNA polymerase II transcription mediator activity || YOL135C || RNA polymerase II holoenzyme/mediator subunit || 1450323	-1.56	1.36		-0.1	0.19	0.24		0.76		-0.08	1.33	-2.85			-1.51	-0.31	-0.68	-0.19		-0.26	0.48	0.32	-0.26	-1.76	-0.13	0.99	-0.03	0.55	-0.32	-1.38	0.81		-0.61	0.24		-0.96		1.14	1.4	0.37	0.95	-0.08	0.22	0.31	0.55
YGR021W_ORF	|| || biological_process || molecular_function || YGR021W || Hypothetical ORF || 1450324	-0.99	0.69	-0.41	1.1	0.45	1.11				0.58	0.1	-2.02		1.15	-0.13	-0.48	-1.31	0		0.23	-0.09		-0.03	-0.04	1.36	0.87	-0.23	-0.72	0.33	0.49	0.59	-0.43	0.4	1.12	0.85	-0.33	-1.88	2.02	-0.6	-0.2	0.18	0.29	0.35	0.29	0.04
YGL070C_ORF	|| RPB9 || telomere maintenance* || DNA-directed RNA polymerase activity || YGL070C || RNA polymerase II core subunit || 1450325	0.1	0.32	1.48	0.62	0.72	0.9	-0.38	0.97	-1.27	0.39	-0.41	-1.04	0.9	1.71	-0.45	-0.34	1.14	1.06		0.13	0.75	0.41	-0.61	0.44	1.61	-0.05	0.32	0.58	-0.73	-0.03	-0.21	0.18	-0.16	0.49		-0.69	-2.57	-1.71	1.08	0.23	0.39	0.03	0.35	1.08	0.01
YKL195W_ORF	|| MIA40 || protein targeting* || molecular_function || YKL195W || The authentic, non-tagged protein was localized to the mitochondria || 1450326	-0.31	-2.09	-0.51	-0.82	-0.42	0.93	-1.03	-1.91	-1.2	-0.19	-0.43	-1.59	-0.16		0.48	-1.1	-1.49	-0.48	-0.37	-0.53	0.2	0.08	-0.78	0.59	-0.61	-1.08	-0.04	-0.7	-1.25	-0.37	-0.5	-0.29	-1.02	0.06	-0.44	0.09	1.25	0.46	0.19	-0.67	-0.18	-0.28	0.42	-0.38	1.28
YBR111C_ORF	|| YSA1 || biological_process || phosphoribosyl-ATP diphosphatase activity || YBR111C || Protein with weak homology to D. melanogaster serendipity protein and X. laevis basis fibroblast growth factor || 1450327	1.25	-0.1	-1.04	2	-0.43	0.64	-0.33	0.54	0.93	1.64	0.24	-1.27	0.05	-0.92	0.28	-0.54	0.14	0.47	1.05	1.2	0.54	-0.54	0.78	0.45	0.6	-0.34	0.54	-0.12	0.15	1	0.61	1.06	1.58	0.51	1.02	2.81	0.9	0.58	0.66	-0.35	-0.21	0.28	1.35	0.91	1.36
YDR516C_ORF	|| EMI2 || response to drug* || molecular_function || YDR516C || Early Meiotic Induction || 1450328	0.39	1.76	0.64	-0.61	0.14	0.13	-0.84	1.4	-2.91	-0.64	-1.22	-2.98		0.51	0.67	0.36	0.65	-1.15		-1.01	-0.66	-1.34	-0.45	0.01	-2.55	0.6	-0.35	-0.93	-2.25	-0.38	-0.49	0.53		-1.28		-1.24	-0.11	1.2	-0.04	-1.61	-0.96	0.07	-0.44	-0.94	-0.92
YNL339C_INT_1	|| YRF1-6 || telomere maintenance via recombination || DNA helicase activity || YNL339C || YBOX_INT1000247:INT_1_YNL339C:NC_001146:complement(5932..6079) || 1450329	-0.36	-0.63	1.34	0.52	-0.14	-0.39	-0.22	-0.91	-1.66	-0.46	-0.15	0.01	0.16	0.76	1.14	2.38	0.72	0.15	-0.16	1.14	1.3	1.36	1.24	-0.03	1.55	-0.01	0.4	0.09	-0.02	0.12	0.69	0.85	0.15	0.83	-5.98	0.44	-2.51	0.83	0.84	1	-0.16	0.42		-0.2	0.37
YGL242C_ORF	|| || biological_process || molecular_function || YGL242C || Hypothetical ORF || 1450330	0.45	1.03	-0.41	0.92	1.41	0.7	-0.15	-0.71	-0.48	0.44	0.32	-0.8	0.59	-1.4	0.07	-0.45	-0.28	0.12		0.24	0.1	-0.76	0.51	0.48	1.32	0.54	-0.39	-0.19	0.34	-0.32	-0.07	-0.22	0.97	-0.02		1.96	-0.34	-0.12	0.02	-0.44	0.22	0.2	0.07	0.12	0.49
YDR003W_ORF	|| RCR2 || vesicle-mediated transport || molecular_function || YDR003W || Hypothetical ORF || 1450331	-0.81	2.15	2.23	0.07	0.47	0.68	1.51	1.53	-2.75	0.02	2.09	-1.28	0.54	0.25	0.29	0.41	-0.71	-0.36		0.73	0.72	0.53	-0.01	0.94	1.11	0.71	0.46	-0.08	0.1	-0.01	0.25	-0.73	0.46	-0.25		-0.16	0.43	0.77	0.74	0.51	0.39	0.86	0.46	0.05	0.25
YLL009C_TIL_4_150__ORF	|| COX17 || cytochrome c oxidase complex assembly* || thioredoxin peroxidase activity* || YLL009C || YBOX_TIL1000017:TIL_YLL009C_COX17_4_150 || 1450332	0.29	-0.13	1.65	1.01	1.33	0.31	-0.17	0.53		0.73	0	-1.09	-0.24	0.18	-0.49	0.02		0.67	-0.3	-0.33	0.18	0.09	0.46	0.75	-0.1	0.31	0.31	-0.31	-0.04	-0.14	0.33	1.16	-0.41	0.35	-0.78	1.97	0.34	1.37	0.48	0.07	0.25	0.44	1.05	0.75	0.28
YOR099W_ORF	|| KTR1 || protein amino acid O-linked glycosylation* || alpha-1,2-mannosyltransferase activity || YOR099W || type II transmembrane protein || 1450333	-0.72	1	1.43	0.53	-0.42	-0.68	-0.96	1.07		0.19	-0.26	-2.11	-0.43	0.35	1.14	-0.26	-0.23	0.02	-1.01	0.1	-0.4	-0.37	-0.02	-1.07	-0.15	-0.24	-0.98	0.05	-0.26	-0.74	0.85	-0.3	2.06	-0.55	-0.82	-1.54	-3.48	-0.1	0.64	-0.5	-0.86	-0.59	-0.34	-0.67	-0.35
YDL052C_ORF	|| SLC1 || sphingolipid biosynthetic process || 1-acylglycerol-3-phosphate O-acyltransferase activity || YDL052C || 1-acyl-sn-gylcerol-3-phosphate acyl transferase (putative) || 1450335	-0.38	-0.23	0.65	-0.48	0.02	-0.09	0.34	1.21		0.65	-0.2	-1.49		-0.15	1.3	-0.01	0.37	-0.09	-2.3	-0.21	0.41	-0.04	-0.11	0.37	-0.21	-0.27	-0.14	0.26	0.03	0.25	-0.49	-0.27	-0.38	0.21	0.24	-0.14	-0.9	1.88	-0.33	0.03	-0.23	0.15	0.2	-0.82	1.29
YPL189C-A_ONO_ORF	|| || biological_process || molecular_function || YPL189C-A || YBOX_ONO1000126:YPL189C-A_YPL189C-A_SGDID:S0028527_Chr_XVI_188512-188306_RC_Unc_ORF_23 || 1450336	-0.11	1.65	0.73	1.62	2.21	1.58	0.77	1.7		0.75	1.4	-0.58		1.91	1.02	0.63	1.51	1.5		1.82	0.56	1.26	0.59	0.38	0.25	1.95	1.68	0.59	0.22	0.57	1.74	1.35	1.91	1.87		1.07	0.39	2.39	1.39	1.54	1.2	0.06	0.84	2.08	0.86
YCR046C_ORF	|| IMG1 || translation || structural constituent of ribosome || YCR046C || mitochondrial ribosomal protein || 1450338	0.4	0.52	0.68	1.14	0.96	0.67	1.13	1.37	0.56	0.07	-0.1	-0.84	0.19	0.55	1.66	0.68	0.45	0.52	-0.47	0.98	0.41	0.38	0.58	0.89	1.23	1.29	0.44	0.27	1.02	0.77	0.06	0.6	1.2	0.98		2	0.21	0.86	0.09	0.28	0.81	0.55	0.82	0.72	0.89
YOR121C_ORF	|| || || || YOR121C || Hypothetical ORF || 1450339	-0.92	0.95	2.56	-1.49	0.11	-0.01		0.77		0.21	0.66	-2.33		-0.56	-0.08	-0.37	-0.04	-0.76		0.18	-0.3		0.22	-2.64	-1.48	0.66	0.46	-0.55	-0.82	-0.16	0.79	0.31	-0.6	-1.14		-2.37	0.27	0.17	-1.3	-1.49	3.57	0.46	-1.43	-0.36	-0.08
YPR056W_ORF	|| TFB4 || transcription initiation from RNA polymerase II promoter* || general RNA polymerase II transcription factor activity || YPR056W || transcription initiation factor TFIIH subunit || 1450342	-2.17	-1.35	-1.14	1.18	-0.73	0.25	1.16	-0.24		-1.02		-2.49		-1.32	-0.26	-0.19	0.43	0.11		-0.7	-0.06		0.57	0.24	0.65	-0.34	0.53	-0.13	-0.23	-0.45	0.54	0.53	0.34	-0.16		0.34		-3.26		-0.88	0.01	-0.34	-0.01	-0.71	-0.54
YIL107C_TIL_7_195__ORF	|| PFK26 || fructose 2,6-bisphosphate metabolic process* || 6-phosphofructo-2-kinase activity || YIL107C || YBOX_TIL1000068:TIL_YIL107C_PFK26_7_195 || 1450343	0.83		2.91		-1.08	0.7	1.18			-0.89	0.07	-3.27	1.37	0.96	-0.6	-0.3	0	0		-0.58		-0.38		-3.04	-2.36		-0.07		-1.66	-0.05	0.11	-2.41		-0.42		-1.88		2.04		-1.11	-0.42	0.04	-1.2		-1.07
YIL134W_ORF	|| FLX1 || FAD transport || FAD transporter activity || YIL134W || FAD carrier protein || 1450344	0.23	0.99		0.47	0.2	0.12	0.98	1.26		0.37	2.8		0.1	2.25	0.07	0.03		-0.03		0.92	0.71	0.86	0.65	0.07	1.74	0.47	0.64	0.63	1.56	-0.1	-0.03	0.58	0.53	0.56		0.36		1.37	0.53	-1.07	0.41	0.41	0.32	0.08
YNL009W_ORF	|| IDP3 || fatty acid beta-oxidation* || isocitrate dehydrogenase (NADP+) activity || YNL009W || NADP-dependent isocitrate dehydrogenase || 1450345	0.57	1.92	1.56	0.48	0.85	0.01	1.42	0.52			1.44		1.3	2.39	0.27	0.04	0.79	0.96		0.52	0.37	0.81	0.48	-0.13	-1.53	1.14	0.36	0.56	1.25	0.03	0.62	1.45	0.95	0.91		0.47	-0.01	1.21	1.46	0.11	0.43	0.47	0.69	0.51	0.64
YHR128W_ORF	|| FUR1 || pyrimidine salvage || uracil phosphoribosyltransferase activity || YHR128W || UPRTase || 1450346	-0.33	-1.22	0.8	-1.29	-1.28	0.1	-1.37	-1.02	-1.05	-0.29	-0.3	-2.16	-1.17	-0.48	0.35	-0.3	-0.77	0.39	-1.07	-0.5	0.4	-0.2	-0.63	0.59	1.16	-0.92	-0.91	-0.39	-1	-0.09	-0.73	-0.18	-1.14	0.26	0.09	-0.66	-2.44	0.74	0.33	-0.16	0.12	-0.09	0.37	0.34	0.19
YDL224C_ORF	|| WHI4 || regulation of cell size || RNA binding || YDL224C || RNA binding protein (putative)|WHI3 homolog || 1450347	-0.23		-2.4	-0.59	0.13	-0.08	0.99	-0.84		-0.66	-0.64	-1.93	-0.48	0.51	-0.18	-0.65	-0.82	-0.28		-0.93	0.48	0.01	-0.08	-0.58	-2.32	-0.34	-1.01	-0.64	-0.82	-1.19	-1.06	-0.08	0.34	0.04		-0.46		1.28	1.06	-0.47	-0.1	0.38	-0.49	-0.21	-0.03
YAL034C_ORF	|| FUN19 || biological_process || molecular_function || YAL034C || Protein of unknown function || 1450348	0.16	2.49		0.09	-0.16	0.49	0.47	0.91		-0.2	-0.15	-2.07	0.53	2.28	-0.3	0.75	0.34	0.42		0.58	0.79	0.49	-0.3	0.07	-1.75	-0.36	0.88	-0.46	0.55	-0.52	0.26	0.5	-0.06	0.63	-1.3	-0.39	0.03	1.43	1.57	0.71	0.6	0.08	0.02	-0.01	0.87
YBR296C_ORF	|| PHO89 || phosphate transport || sodium:inorganic phosphate symporter activity || YBR296C || Na+/Pi symporter (putative) || 1450349	0.33		-0.94	0.78	2.59	-0.87	1.47	1.98		-0.74	0.68	-1.45	-0.14	-0.23	1.57	0.53	0.43	-0.27		0.67	-0.43	0.68	0.37	-0.33	-2.08	1.82	2.03	-0.27	0.24	-1.44	0.28	0.31	0.76	-0.99		1.92		1.7	1.1	-0.27	0.4	0.24	-0.59	-0.17	-0.73
YLR103C_ORF	|| CDC45 || DNA replication initiation* || DNA binding || YLR103C || chromosomal DNA replication initiation protein || 1450350	-2.46	1.81	1.83	-2.99	-0.54	-1.39	0.93	-0.12		-0.58	1.01	-2.2	-0.12		-1.21	-0.66	-0.95	-1.48		-1.39	-0.6	-0.52	-0.95	-1.57	0.27	0.92	-0.03	-1.73	-1	-1.48	-0.34	0.75	-0.51	-0.98		-2.34		0.59	0.64	-1.35	-0.15	-0.05	-2.21	-0.85	-1.36
YHL050C_INT_1	|| || biological_process || helicase activity || YHL050C || YBOX_INT1000251:INT_1_YHL050C:NC_001140:complement(1898..2669) || 1450351	-1.4	-0.82	-0.9	0.49	0.28	-0.58	0.39	-0.74	-0.99	-0.34	-0.89	-0.63	0.01	-0.3	0.48	0.96	1.27	-0.31	-0.75	-0.67	0.61	0.77	0.42	-1.53	1.65	-0.72	-1.31	-0.94	-0.72	-0.02	0.55	0.07	1.22	0.13	-0.44	-0.05	-1.4	-1.06	-0.72	-0.43	0.63	0.11	-0.76	-0.58	-1.28
YNL044W_ORF	|| YIP3 || ER to Golgi vesicle-mediated transport || molecular_function || YNL044W || Interacts with YPT proteins || 1450352	-0.35	0.35	-1.43	-0.64	-0.74	0.17	-0.81		-0.16	0.38	-0.64	-0.93	-0.41	0.81	1.25	-0.38	-0.67	-0.07	-1.72	-0.3	0.32	-0.5	0.35	0.42	-1.81	1.32	0.01	-0.26	0.46	-0.32	-1.18	-2.42	-0.78	0.19		-0.5	-1.39	-0.72	1.08	-0.06	0.05	-0.27	0.08	-0.23	0.33
YDR210W_ORF	|| || biological_process || molecular_function || YDR210W || Protein of unknown function; green fluorescent protein (GFP)-fusion protein localizes to the cell periphery || 1450353	0.51	-2.19	-0.66	0.43	-0.21	0.78	0.21	0.49		0.48	0.79	-1	0.52	-1.64	-0.18	-0.36	0.48	0.84		1.26	-0.3	0.34	0.69	0.04	0.29	1.63	0.23	1.1	0.27	1.14	0.21	-1.02	0.53	-0.13	1.2	0.21		1.35	1.04	0.56	-0.31	0.14	0.65	-0.12	0.54
YHR163W_ORF	|| SOL3 || pentose-phosphate shunt, oxidative branch || 6-phosphogluconolactonase activity || YHR163W || weak multicopy suppressor of los1-1 || 1450354	0.45	1	-0.27	0.61	0.52	0.88	-0.8	0.51	0.54	0.71	0.77	0.01	0.99	-0.62	1.16	0.49	1.57	1.22		0.66	1.09	0.38	0.14	0.79	0.99	0.21	0.9	1.05	0.53	1.77	-0.26	0	0.32	0.36	-0.92	0.59	-1.7	0.29	0.58	0.28	0.48	0.15	0.74	1.16	0.41
YPL277C_ORF	|| || biological_process || molecular_function || YPL277C || Hypothetical ORF || 1450355	1.61		2.03	0.89	-0.02	-0.66		1.95		-0.63	2.84	-4.38	1.18	2	-1.21	0.48	0.26	-0.06		-0.87	0.04		-0.15		-0.84	-0.63	1.8	0.86		-0.57	1.35	1.54	0.03	0.06		0.38		2.21	0.83	-0.18	0.61	0.06	-0.5	1.01	-0.33
YDR457W_TIL_29_0_DS300_ORF	|| TOM1 || regulation of cell size* || ubiquitin-protein ligase activity || YDR457W || YBOX_TIL1000188:TIL_DS300_YDR457W_29_0 || 1450357	0.77																	0.42					-0.95		-0.24		-0.94	0.45		-1.3				-0.56		-1.2					-1.95	-0.39		1.15
YOR314W_AAA_5_NCR	|| || || || YOR314W || POLYA_DS100_YOR314W_chr=XV_(903467..903566)_5:YBOX_AAA1000082 || 1450358	0.21		-0.7		0.54													-0.89					-1.08				0.58	-0.3		-1.2		1.25		-1.37					1.83	1.63
YML087C_ORF	|| || biological_process || molecular_function || YML087C || Hypothetical ORF || 1450359	1.36	0.39	0.64	2.33	1.91	0.26	2.19	1.67		1.89	2.04	-0.13	0.85	-0.48	0.34	1.14	0	1.73	-0.1	2.13	0.28	0.72	0.86	1.27	-0.7	1.84	2.79	0.71	0.88	0.52	1.81	1.67	0.88	0.79		3.55		1.23	0.48	0.27	1.03	0.89	2.2	1.03	1.92
YOL001W_ORF	|| PHO80 || telomere maintenance* || cyclin-dependent protein kinase regulator activity || YOL001W || Pho80p cyclin || 1450360	0.42			1.23	0.84	1.54	-0.15	2.31		-1.17	2.26	-1.89	1.14	1.21	0.7	0.73	-0.28	1.34		0.32	0.88	0.56	0.57	-0.6	-1.26	0.79	-0.35	0.23	0.62	0.43	0.71	-0.14		1.12		0.27		1.32	-1.33	0.65	0.67	0.4	-0.14	0.56	0.99
YNL216W_ORF	|| RAP1 || transcription from RNA polymerase II promoter* || DNA binding* || YNL216W || repressor activator protein || 1450362	-1.69	0.04		-0.98	-1.71	-1.38	-0.59	0.03		-0.91	-0.83	-1.51		1.07	-1.36	-1.2	-1.15	-2.1		-2.26	-1.22	-0.87	-1.65	-1.49	-1.67	-0.27	-1.24	-1.99	-1.34	-1.86	-1.04	-0.62	-0.8	-1.95		-1.05		-0.81	-1.67	-1.82	-1.42	-0.47	2.59	-0.71	-0.86
YPR091C_ORF	|| || biological_process || molecular_function || YPR091C || Hypothetical ORF || 1450363	-1.68		0.8	-2.12	-1.95	-1.43	-0.5	0.4		-1.02	-0.3	-4.48	1.79		-0.07	-0.94	-1.47	-2.55		-1.14	-0.1	-1.31	-1.43	-1.29	-3.01	-0.86	-1.12	-3.57	-0.49	-1.04	-1.71		-0.94	-1.86		-2.81		0.76	-1.01	-1.28	-0.43	-0.77		-1.1	-0.65
YMR038C_ORF	|| CCS1 || intracellular copper ion transport || superoxide dismutase copper chaperone activity || YMR038C || copper chaperone for superoxide dismutase Sod1p || 1450364	1.62	4.41	5.95	5.28	6.09	3.58	-0.63	3.92	-0.31	4.52	1.41	3.69	5.75	3.15	1.11	2.71	3.43	5.06	-0.97	1.64	2.37	-0.48	4.85	0.81	1.34	6.15	3.01	1.37	2.69	3.61	4.45	4.59	7.15	2.15	-2.88	4.38	0.82	6.63	4.13	3.14	-0.61	-0.12	0.83	5.29	2.48
YAR020C_ORF	|| PAU7 || biological_process || molecular_function || YAR020C || similar to Pau3, member of Pau1 family || 1450365	-0.55	-1.91	2.82	0.42	-0.34	1.36	1.6	2.02		-1.14	1.3	-3.78	-0.41	0.57	-0.33	1.04	1.1	0.35		0.82	1.17	0.18	-0.83	-1.95	0.57	0.74	-0.12	0.68	1.37	-0.38	-1.73	1.81	0.68	0.99	-0.08	-1.36		1.82	-0.24	-0.76	0.76	0.13	-1.15	-0.19	-0.91
YJL069C_ORF	|| UTP18 || ribosome biogenesis and assembly* || snoRNA binding || YJL069C || U3 snoRNP protein|U3 snoRNA associated protein || 1450366	0.39	1.32	2.77	1.5	0.57	0.46	-0.13	1.7		0.31	1.62	0.71	1.2	0.59	0.46	0.32	0.56	0.66		1.43	0.52	0.11	0.83	-0.7	1.76	1.47	1.21	0.53	0.89	0.95	1.31	1.85	1.46	0.11		0.41		1.25	0.29	0.76	-0.77	-0.28	-0.86	0.82	0.32
YNR030W_ORF	|| ALG12 || protein amino acid glycosylation* || alpha-1,6-mannosyltransferase activity || YNR030W || mannosyltransferase || 1450367	0.13	-0.74	0.4	-0.17	-0.9	-0.17	-1.37	-0.17	-2.06	-0.2	-0.33	-1.87	0.59	0.67	0.45	0.06	-0.23	-0.14	-3.73	-0.69	0.17	-0.76	-0.09	-0.79	0.11	-0.15	-1.39	-0.8	-0.38	-0.03	-0.65	-0.99	-0.49	-0.33		-1.25		0.61	-0.88	-0.69	-1.04	-0.71	-0.48	0.35	-0.73
YMR245W_ORF	|| || || || YMR245W || Hypothetical ORF || 1450369	0.79	3.45	4.07	0.65	1.91	0.91	0.51			0.65	1.91			1.33	0.59			0.55		0.96	0.77	-0.02	0.26	0.11	3.59	0.96	0.71	0.78	0.72	0.25	0.88	1.33	1.63	1.56	0.9	0.39			1.74	2.02		0.27	1.1	1.25	0.78
YKL061W_ORF	|| || biological_process || molecular_function || YKL061W || Hypothetical ORF || 1450370	-0.09	0.44	1.85	-0.12	0.9	0.26	1.02		-1.74	0.69	1.09			0.87	-0.15	0.14	-0.23	0.15		-0.67	0.74	0.09	0.02	0.35	2.45	0.55	0.84	-0.02	0.35		-0.85	0.6		-0.02		-0.2	0.36	1.33	-0.39	0.18	0.32	0.12	0.65	-1.57	0.28
IGR_CHR02:(234361..234579)_68	|| || || || || YBOX_IGR1000142:gBL05_14:gBL05_14:chr02.fsa:(234361..234579):219:bp._68_0 || 1450371	-2.52		-0.88	-2.47	-3.18	-1.4	-1.97	-3.25		-0.8	-0.88	-3.21	-0.03	-1.04	-1.5	-1.04	-1.79	-2.46		-3.62	-2.28	-1.28	0.48	-2.45	-0.53	0.94	-3.04		-2.96	-1.46	-2.23	-2.19	-2.75	-2.4		-2.46		-0.48	-1.59	-1.54	-2.14	-1.37	-2.18	-2.53	-1.87
YMR073C_ORF	|| || response to drug || molecular_function || YMR073C || Hypothetical ORF || 1450372	0.45	2.78	-0.95	0.27	-0.12	0.57		0.25		0.46				0.4	0.17	-0.63	-0.48	0.67		0.92	-0.19	0.31	0.82	0.33	-0.93	0.29	0.7	0.67	0.94	0.25	-0.86	0.76	0.11	-0.02	-1.79	0.53	-4.56	2.22		0.88	-0.23	0.6	0.36	1.24	-0.1
YJR055W_ORF	|| HIT1 || telomere maintenance || molecular_function || YJR055W || Protein required for growth at high temperature || 1450373	-0.21	-2.44	0.55	0.6	-0.02	0.1		0.25		1.06	1.64	-2.19	0.03	0.91	-0.47	-0.52	0.34	-0.1		0.16	0.17	0.69	-0.12	-0.38	1.58	0.46	0.8	-0.66	0.89	-0.93	1.93	0.96	0.5	-0.2		1.51		-0.35	-0.54	0.4	-0.55	0.37	0.47	0.3	0.66
YKL026C_ORF	|| GPX1 || response to oxidative stress || glutathione peroxidase activity* || YKL026C || Phospholipid hydroperoxide glutathione peroxidase induced by glucose starvation that protects cells from phospholipid hydroperoxides and nonphospholipid peroxides during oxidative stress || 1450374	0.94	0.34	0.25		0	0.39	1.79	1.94		1.26	1.54	0.08	0.43	0.47	0.9	0.64	1.33	0.6		1.71	0.1	0.99	1.06	-2.73	1.3	1.06	2.22	-4.18	-0.46	-0.31	1.81	0.99	1.82	0.26		0.8	1.2	-0.59	0.41	0.74	-0.45	0.45	1.1	0.21	0.11
SNR57_SNORNA	|| SNR57 || || || snR57 || YBOX_SNO1000013:SNO_SNR57_SNR57_SGDID:S000006448_Chr_XII_RC_snoRNA_10 || 1450375	-1.45	0.27	0.95	0.67	0.37	-1.37	-0.28	0.79		-2.09	1.02	2.48	-0.28	0.85	-1.26	0.45	-0.27	-1.27		0.78	-0.99	0.2	-2.79	-1.56	-0.39	0.06	0.7	0.37	0.41	-0.26	-0.79	0.4	-0.25	-1.19		-1.07	-1.47	0.03	-0.23	-0.04	0.31	-1.02	-0.55	-0.82	-0.32
YLR288C_ORF	|| MEC3 || chromatin silencing at telomere* || DNA binding || YLR288C || Involved in checkpoint control and DNA repair || 1450376	-0.87	0.61	0.76	-1.19	-0.5	-0.74		1.88		0.07	2.33	-2.54	1.6		-0.49	-0.81	-0.97	-0.94			-0.23		-1.71	-4.78	0.16			-0.99	0.49	-1.36	0.15	1.81	0.4	-0.2		-1.44		0.98	0.54	0.06	0.94	0.27	-0.18	0.12	-0.11
YER145C_ORF	|| FTR1 || high affinity iron ion transport || iron ion transporter activity || YER145C || iron permease || 1450377	0.43	2.16	2.52	2.95	3.81	1.22	-0.7	1.92	-0.66	2.19	0.73	1.34	3.21	1.28	0.94	1.52	1.27	1.55	-0.64	1.03	1.31	0.23	1.99	0.68	2.58	3.4	0.99	0.18	2.22	2.69	1.52	1.63	3.8	1.4	-0.52	1.78	-0.3	3.89	2.52	0.88	-0.76	0.34	1.69	2	0.93
YDR395W_ORF	|| SXM1 || mRNA export from nucleus* || protein carrier activity || YDR395W || karyopherin beta family member || 1450378	-1.64		-0.49	-1.94	-2	-1.22	-0.33	-0.89		-0.88	0.39	-1.83	-0.66	-3.86	-1.43	-1.67	-1.86	-1.41		-1.65	-1.37	-0.95	-0.34	-0.85	-0.24	-2.13	-2.25	-1.01	-1.95	-1.8	-1.57	-1.9	-1.48	-2.08	-3.38	-1.65		-0.88	-0.3	-1.72	-1.33	-0.73	-1.14	-1.31	-1.03
YGL086W_ORF	|| MAD1 || mitotic spindle checkpoint* || molecular_function || YGL086W || coiled-coil protein involved in spindle-assembly checkpoint || 1450379	-1.07	-1.83	-0.77	-1.74	-1.02		0.07				0.16	-3.19	0.3	1.11	-1.69	-1.79	-1.07	-1.85		-0.75	-0.56	-1.22	-1.25	-2.29	-0.93	-0.39	1.35	-1.11	-1.17	-1.64	-0.49	1.11	-1.8	-0.99		-1.85		-0.11	0.41	0.15	-0.68	-0.42	-2.26	-2.24	-0.99
YNL251C_ORF	|| NRD1 || transcription termination from Pol II promoter, RNA polymerase(A)-independent || RNA binding || YNL251C || RNA-binding protein that interacts with the C-terminal domain of the RNA polymerase II large subunit (Rpo21p), required for transcription termination and 3' end maturation of nonpolyadenylated RNAs || 1450380	-2.87	-1.31	-1.66	-0.97	-1.76	-0.58	-1.18	-0.5		-2.2	-1.11	-1.16		0.71	-0.95	-0.99	-0.88	-0.71		-1.15	-0.33	-0.97	-0.57	-1.37	-1.83	-1.8	-2.37	-1.1	-0.77	-0.85	-1.38	-1.85	-1.24	-0.58		-1.77	-4.18	-0.65	-2.06	-1.2	-1.04	-1.02	-1.22	-0.78	-1.38
YPL108W_ORF	|| || biological_process || molecular_function || YPL108W || Hypothetical ORF || 1450381	0.37	1.41	1.92	2.55	2.1	0.96		2.2		1.67	2.44	-2.17	-0.17	1.34	-1.14	0.19	0.07	0.39		0.65	0.01	0.95	1.08		1.95	3.55	1	-0.23	0.56	0	1.64	0.89	1.46	1.66		0.81		1.51	0.55	-0.24		0.24	-1.71	1.15	0.99
YHL043W_ORF	|| ECM34 || cell wall organization and biogenesis || molecular_function || YHL043W || ExtraCellular Mutant || 1450382			4.35	2.88	2.8	1.12	1.28			2.05		-7.14	1.23		-1.41	0.7	0.12	1.1			0.72	-0.31	1.05		0.29	2.8	2.29	-0.08	0.68	-0.25		1.78	1.18			2.03		1.63	1.1	1.1	-0.25	-0.33		1.24
YER180C_ORF	|| ISC10 || sporulation || molecular_function || YER180C || Meiosis-specific protein required for spore formation || 1450383	0.27	0.32	0.67	-0.22	-0.36	-0.29	1.14	-2.51			0.61	-1.02		0.51	-1.19	0.18	0.87	-0.98		0.45	0.02	-0.06	-0.73	0.09	0.72	1.82	0.77	0.31	0.24	-0.38	-0.52		0.51	-0.36		-0.91		1.56	0.14	0.48	0.5	-0.02	-0.22	-0.03	0.09
YHL008C_ORF	|| || biological_process* || transporter activity* || YHL008C || Hypothetical ORF || 1450384	0.25	1.25	2.34	2.42	1.59	0.82	0.73	2.15		0.96	1.6	-0.94	1.17	0	0.29	0.26	0.39	0.52		0.56	1.22	0.33	1.03	-0.15	-0.96	3.02	1.25	-0.31	0.73	0.1	1.82	0.75	2.25	1.04		1.56	-1.96	1.77	0.78	-0.09	0.36	0.32	-0.01	0.46	0.66
YGL258W_ORF	|| VEL1 || biological_process || molecular_function || YGL258W || Increased in velum formation in flor strain || 1450385	1.66			0.92	1.69			2.35		-1.75	1.97	-3.42			-1.55	1.06		-0.14		0.5	0.31		0.51		0.81			0.85	-1.3	-1.24	0.98	1.32	0.66	-0.25		0.33		1.72	1.68	0.58	0.99	0.63		0.29	0.98
YDR098C-B_ORF	|| || || || YDR098C-B || TyB Gag-Pol protein; proteolytically processed to make the Gag, RT, PR, and IN proteins that are required for retrotransposition || 1450386	-1.97	-1.99	-3.03	-2.58	-2.76	-0.55	-2.42	-2.92	-0.71	-2.08	-2.29	-0.56	-1.81	-2.86	-1.98	-0.98	-2.43	-1.38	-1.71	-1.62	-1.22	-2.32	-2	-1.76	-2.48	-1.91	-2.77	-1.95	-1.81	-1.32	-1.87	-1.73	-2.82	-1.19	-2.84	-2.45	-2.5	-2.81	-3.14	-2.14	-1.59	-1.36	-1.56	-1.95	-2.07
YDL068W_ORF	|| || || || YDL068W || Hypothetical ORF || 1450388	1.34		2.65				1.74			0.5	3.61	-2.27	1.31		-1.87			-0.4		1.02		0.6	0.95		0.84			-3.53	1.07	-0.28	1.63	1.57		0.48				1.44	1.37			0.39	1.54		1.24
YPL143W_ORF	|| RPL33A || translation || structural constituent of ribosome || YPL143W || ribosomal protein L33A (L37A) (YL37) (rp47) || 1450389	0.9	-0.89	-1.26	-0.72	-0.42	0.66	-1.26	-0.58	0.83	0.95	-0.51	2.5	-0.59	-0.96	-0.09	-0.56	-0.17	0.1	0.91	0.27	0.58	0.48	0.21	0.18	-0.67	-0.67	-0.29	-0.2	-0.23	0.15	-0.18	-0.48	-0.66	0.44	1.53	1.26	-0.91	0.04	-0.56	0.08	-0.38	-0.3	0.57	0	-0.2
YMR280C_ORF	|| CAT8 || positive regulation of transcription from RNA polymerase II promoter* || specific RNA polymerase II transcription factor activity || YMR280C || zinc-cluster protein involved in activating gluconeogenic genes; related to Gal4p || 1450390	1.3	1.91	2.91	0.09	2.14			3.12		-0.4	1.03	-2.55			-1.03	0.86		1.38		-0.39	-0.66	0.91	-0.53		-4.29			1	0.87	-2.16	0.12	2.19		-0.45		-0.29		1.67	1.41	-0.26		0.63	-5.02	-0.45	-3.42
YKL087C_TIL_301_600_159_ORF	|| CYT2 || cytochrome c-heme linkage || holocytochrome-c synthase activity || YKL087C || YBOX_TIL1000261:TIL_YKL087C_301_600_159_0 || 1450391	-1.65		2.38	-1.04	-1.32	1.67	-0.35	1.34		0.62	0.2	-1.98	0.54	0.12	0.11	-0.41		0.82		-0.31	0	-0.11	0.37	0.93	-0.52	1	1	0.41	-0.11	0.2	-0.36	0.76	0.74	0.77	0.64	-0.14	0.06	2.75	0.34	0.15	0.61	0.04	0.53	0.35	0.26
YKR012C_ORF	|| || || || YKR012C || Hypothetical ORF || 1450392	-0.84	1.59	-1.82	0.34	-2.33		1.13	1.86		0.46	1.24	-4.07	0.69		-0.9	0.28	-0.68	0.28		0.21	-0.02	0.56	0.49	0.32	1.79		1.24			-0.65	1.03	0.99	0.66	0.86		0.17		-0.97	-0.06	-0.96	0.95	0.08	0.35	0.63	0.12
YGR072W_ORF	|| UPF3 || telomere maintenance* || molecular_function || YGR072W || factor stimulating decay of mRNAs containing premature stop codons; acts with Nmd2p and Nam7p || 1450394	0.51		0.06	-0.65	-1.4	0.45	0.36	0.91		0.78	-1.23	-1.65	0.25	0.42	-0.16	-0.98	0.1	-0.35		-1.09	-0.53	0.67	-0.5	0.86	1.3	1.09	-0.57	-0.66	-0.83	-0.71	-0.53	-0.71	-0.34	-0.47		-0.05	-2.2	-3.7	-0.61	-0.32	0.15	0.41	0.67	0.34	0.42
TA(UGC)Q_TRNA	|| || || || tA(UGC)Q || YBOX_TRN1000057:TRN_TA(UGC)Q_SGDID:S000007315_Chr_Mito_tRNA_0 || 1450395	0.45	1.03	3.07	1.36	-0.1	-1.65	1.31	1.91	-0.88	-1.48	-0.57	-3.34	0.18	1.97	-0.45	0.14		-0.75		-0.31	-1.56		-0.41	-0.24	-2.93	-2.11	0.12	0.23	-1.33	-0.17	1.04	-0.1	0.15	-1.24		-1.08	-1.85	1.55	-2.11	-0.78		0.19	-0.14	-1.66	0.22
YBR162C_ORF	|| TOS1 || response to drug || molecular_function || YBR162C || Target of SBF || 1450396	-0.22	0.44	0.35	0.16	0.27	1.12	-1.3	-0.33	-1.84	-0.34	-0.61	-0.1	0.89	-1.14	0.76	0.06	1.65	0.74	-0.55	0.16	1.12	-0.08	0.79	0.09	-1.29	0.9	-0.04	0.48	0.38	1.5	-0.93	-0.96	0.64	0.71	-1.03	-0.78	-0.93	-1.07	-0.19	-0.05	-0.07	-0.75	-0.28	0.36	-0.79
YGR037C_ORF	|| ACB1 || fatty acid metabolic process* || long-chain fatty acid transporter activity* || YGR037C || acyl-CoA-binding protein (ACBP)/diazepam binding inhibitor (DBI)/endozepine (EP) || 1450397	0.77	-0.08	-1.11	-1.07	-1.01	0.13	-1.14	-1.01	0.04	0	-0.64	1.11	-0.61	-0.1	0.35	-0.38	-3.79	0.21	0.13	-0.19	-0.13	0.3	-0.29	1.02	-1.43	-0.69	-0.14	0.36	0.01	0.52	-0.66	-0.69	-1.12	0.03	-0.09	0.54	0.52	-0.66	0.57	0.76	-0.03	0.12	1.09	0.54	0.56
YKL087C_TIL_1_300_126_ORF	|| CYT2 || cytochrome c-heme linkage || holocytochrome-c synthase activity || YKL087C || YBOX_TIL1000260:TIL_YKL087C_1_300_126_0 || 1450398	-0.53	6.25	0.54	0.7	-1.43	0.28	0.48	1.01		-0.22	2.93	1.35		0.66	0.07	2.24	-0.69	0.13		-0.09	0.28	0.24	-0.13	0.52	-0.62	0.57	-0.04	-0.04	0.58	-0.53	-0.75	-0.22		0.76	0.28	0.28	0.75	0.4	1.09	-0.02	0.16	-0.01	0.41	0.18	0.03
YOL086C_AAA_16_NCR	|| ADH1 || NADH oxidation* || alcohol dehydrogenase activity || YOL086C || POLYA_DS100_YOL086C_chr=XV_(complement(159359..159458))_16:YBOX_AAA1000067 || 1450399	1.33		1.99	1.55	1.43	0.37	-0.05	1.48		0.26	2.29						1.78	0.47		1.16	1.38	0.45	0.2	-0.34	2.12	0.37	1.15		0.79	0.47	0.32			0.47		0.65		-1.37	0.64	-0.73	1.12	-0.09	0.02	0	-0.34
YCR097W_ORF	|| HMRA1 || regulation of transcription, mating-type specific || transcription corepressor activity || YCR097W || homeobox transcription factor || 1450400	-0.53	-0.93	-0.8	-0.43	0.24	0.37	0.45	-1.22		0.08	-0.02	-1.69	0.45	-2.39	-0.17	-0.48	1.58	0.02		-0.52	-0.27	0.18	0.19	0.49	0.32	-0.35	-0.42	0.21	-0.26	-0.03	-1.09	0.24	0.16	0.61	0.9	0.24	0.07	0.59	-0.52	-0.17	0.94	-0.11	0.87	0.47	0.12
YOR172W_ORF	|| YRM1 || positive regulation of transcription from RNA polymerase II promoter* || specific RNA polymerase II transcription factor activity || YOR172W || zinc finger transcription factor || 1450401	-1.09	-1.14	-1.52	-0.93	-0.36	-0.21	-1.62	-0.51		-2	0.37	-3.23			0.01	0.2	-0.72	-0.77		-0.93	0.18	0.09	0.41	-4.47	-0.48	-0.96	-2.36	-1.13	-0.77	-0.78	-0.12	-0.16	-0.74	-0.74		-0.48		1.68	-0.39	-0.07	-0.35	-0.45	-1.41	-1.6	-1.24
YOR137C_ORF	|| SIA1 || proton transport || molecular_function || YOR137C || Suppressor of eIF5A || 1450402	0	-0.09	-0.47	-0.65	-0.83	0.11	-1.17	0	-5.77	-0.29	-0.35	-1.18	-0.77	0.74	-1.06	0.02	-1.46	-0.95	-2.75	-0.15	0.12	-0.21	-0.85	-1.29	-0.99	-0.17	-0.54	-1.4	-0.89	-0.52	-0.55	0.33	-0.54	-0.84	-2.44	-0.5	-1.41	-0.94	-0.82	-0.51	1.35	-0.16	-0.41	-1.46	-0.52
YLR119W_ORF	|| SRN2 || protein targeting to vacuole* || protein binding || YLR119W || Suppressor of rna1-1 mutation || 1450403	-4.18	2.07	1.33		0.24	0.19	0.67	-2.8		0.6	0.73	-3.75	-0.31	-2.06	-0.15	-0.77	-0.39	-0.03		0.51	0.15	0.37	0.32	0.61	-1.1	0.46	0.08	-0.83	0.34	-0.18	-0.47	0.41	1.08	0.49		1.01	-0.39	0.99	1.05	0.45	0.59	0.61	0.43	0.27	0.59
YEL025C_ORF	|| || biological_process || molecular_function || YEL025C || SWI/SNF and RSC interacting protein 1 || 1450405	-1.45	1.16	1.93	-1.03	-0.79	-0.86	0.57	0.61		-0.88	0.69	-3.38	-0.52	1.57		-0.07	-0.62	0.23		0.1	-0.53	0.75	0.41	-1.36	-0.06	1.27	0.12		-0.38	-1.52	-0.05	-0.08	-0.05	-0.86		-0.73			0.35	1.76	1.81	1.42	-0.59	-0.89	-0.35
YDR316W-A_ORF	|| || || || YDR316W-A || TyA Gag protein; the main structural constituent of virus-like particles (VLPs) || 1450406	-0.03	-1.9	-2.53	-1.98	-1.45	-0.57	-3.85	-2.43	-0.78	-1.04	-1.59	-0.92	-1.79	-2.03	-2.32	-1.19	-1.38	-1.28	-1.1	-1.94	-0.67	-1.94	-1.25	-0.8	-2.31	-1.88	-2.5	-1.66	-1.29	-1.11	-1.79	-2.35	-2.52	-0.23	-1.19	-1.42	-1.93	-2.21	-1.51	-1.75	-1.02	-1.36	-1.42	-1.25	-1.61
YDR019C_ORF	|| GCV1 || one-carbon compound metabolic process* || glycine dehydrogenase (decarboxylating) activity || YDR019C || glycine decarboxylase complex T subunit || 1450407	-0.53	1.46	1.59	0.92	-0.25	-0.71	0.4	2.21		0.2	0.86	-2.42	1.46	1.94	0.56	0.07	-0.36	0.36		0.25	0.51	-0.21	0.71	0.68	-0.6	0.48	0.52	-0.57	0.3	-0.01	1.37	0.72	0.27	0.71		1.43	0.43	0.12	1.31	-0.04	-0.16	0.16	0.08	0.77	0.25
YDR397C_INT_1	|| NCB2 || positive regulation of transcription from RNA polymerase II promoter* || transcription coactivator activity* || YDR397C || YBOX_INT1000109:INT_1_YDR397C:NC_001136:complement(1266760..1266851) || 1450409	0.4	3	2.94	1.1	1.46	0.56	1.27	0.96		1.35	1.64	-4.98	-0.83	3.45		0.38	-0.64	0.63		1.14	-0.13	1.03	0.57	-1.31	2.91	1.76	0.96	0.82	0.88	0.14	1.58	0.72	0.48	0.34		0.34		1.75	0.16	1.57	0.86	0.44	0.67	1.12	0.42
YFR024C-A_JXN_EE20_1_ORF	|| LSB3 || actin filament organization || molecular_function || YFR024C-A || YBOX_JXN1000096:JXN_EE20_1_YFR024C-A:NC_001138:complement(join(203222..203256,203375..203409)) || 1450410	-3.48	0.55	-2.11	-1.16	-1.43	-0.38		2.45		-0.68	0.44	-4.38	-0.64		0.12	0.64	-1.16	-0.9		-0.16	-0.16		-0.67		0.44	0.15	0.51	-1.26	0.16	-1.18	-1.03	-1.28	-2.06	-0.96		-1.45		-3.26	-0.58	0.21		0.83		-0.97	-0.8
YML125C_ORF	|| PGA3 || secretory pathway || molecular_function || YML125C || Protein required for cell viability || 1450411	-1.22	-1.42	0.83	-0.67	-1.22	-0.1	-0.27	0.67		-0.76	-0.24		0.55	-0.33	1.38	0.65	-0.35	-0.23		-0.72	0.24	-0.1	-0.51	0.42	-0.21	0.44	-0.32	-0.46	-0.37	0.17	0.19	-1.04	-0.71	-0.07	-0.07	-0.54		1.07	0.54	-0.99	-0.29	-0.51	-0.04	-0.51	-0.77
YER011W_ORF	|| TIR1 || response to stress || structural constituent of cell wall || YER011W || Cold-shock induced protein of the Srp1p/Tip1p family of serine-alanine-rich proteins. Encodes a stress-response cell wall mannoprotein and this gene is downregulated at acidic pH. || 1450412	-0.85	-1.97	-1.74	-1.1	-1.29	-0.83	-3.39	-1.73	-2.03	-1.61	-1.7	-0.17	-1.1	-1.8	-0.53	-0.67	-1.41	-0.36	-1.25	-0.91	-0.31	-1.79	-0.29	-0.9	-2.57	-1.74	-1.29	-1.12	-1.15	0.1	-1.61	-1.34	-1.18	-0.44	-1.25	-1.12	-1.42	-1.46	-0.93	-1.05	-1.75	-2.54	-0.9	-0.11	-0.68
YOR309C_ORF	|| || || || YOR309C || Hypothetical ORF || 1450413	-1.26	-0.57	0.03	-2.12	-2.02	-1.04	-1.68	-1.7	-4	-1.67	-0.68	-0.59	-1.2	-2.04	-1.03	-1.38	-2.16	-1.09		-0.74	-0.87	-1.17	-1.57	-0.18	1.99	-1.56	-0.83	-1.3	-1.57	-1.58	-0.03	-0.52	-0.41	-1.66	-1.2	-1.02		-0.58	-1.82	-1.48	-1.61	-1.43	-0.47	-0.89	-0.32
YGR244C_ORF	|| LSC2 || tricarboxylic acid cycle* || succinate-CoA ligase (ADP-forming) activity || YGR244C || beta subunit of succinyl-CoA ligase (synthetase; ATP-forming), a mitochondrial enzyme of the TCA cycle || 1450414	-0.59	-0.14	-0.4	-1.37	-0.84	-0.26		-2.23	-1.53	-0.95	-1.9	-0.98	-0.44	0.47	0.98	-0.19	-1.28	-0.41	-0.68	-0.17	0.16	-0.56	-0.87	0.3	-1.59	-0.56	-0.8	-1.19	-0.27	-0.69	-0.89	-0.96	-0.58	-0.77		-0.4	0.46	1.21	-0.2	-0.64	-0.26	-0.24	0.21	-0.48	0.66
YEL060C_ORF	|| PRB1 || sporulation* || serine-type endopeptidase activity || YEL060C || vacuolar protease B || 1450415	-0.34	-1.55	-1.12	-0.42	-0.52	0.3	0.6	0.19	-1.98	-0.74	-0.42	-0.85	0.02	-1.02	-0.11	0.06	0.51	0.22		-0.55	0.17	-0.1	-0.82	0.01	-0.89	-0.54	-0.96	-0.52	-0.51	0.39	-1	-0.78	-1.58	0.28		-1.19	-0.6	-1.4	-0.63	-0.2	0.28	-0.13	-0.64	0.15	-0.48
YLR087C_TIL_1501_1800_102_ORF	|| CSF1 || fermentation || molecular_function || YLR087C || YBOX_TIL1000265:TIL_YLR087C_1501_1800_102_0 || 1450417	0.06	1.06		-0.94	-0.67	-1.28	0.51	3.31		0.63	-1.93	-2.92	1.39		0	0.63	0	-0.19		-0.63	-0.45	-0.23	0.36	-4.19	-0.26	1.11	-0.57			-0.43	-0.97	0.76		-0.53		0.09		1.46	0.55	-1.79	0.26	-0.51	-1.68	-0.49	-1.56
YDR054C_ORF	|| CDC34 || G1/S transition of mitotic cell cycle* || ubiquitin-protein ligase activity || YDR054C || ubiquitin-conjugating enzyme || 1450418	-0.6	-2.04	-0.38	-1.22	-1.42	-0.27	-0.25	-1.25		-0.28	-1.08	-0.11	-0.45	-1.28	-0.09	-0.2	0.86	-1.38		-1.59	-0.48	-0.34	0.52	0.03	2.19	-0.91	-0.84	-1.31	-1.28	-0.66	-1.17	-1.3	-0.49	-0.36	0.44	-1.18	-0.4	-1.51	0.18	-1	0.15	0.27	0.16	-0.21	0.34
YHR179W_ORF	|| OYE2 || biological_process || NADPH dehydrogenase activity || YHR179W || NAPDH dehydrogenase (old yellow enzyme), isoform 2 || 1450419	-0.87	1.04	-0.52	1.19	-0.74	-1.14	-2.29	-0.06	-1.55	-0.42	-0.26	-0.64	0.98	-1.53	0.4	-0.19	0.05	-0.05	-2.08	-0.75	-0.32	-1.05	-0.18	0.09	-1.13	-0.36	-0.81	-0.13	-0.68	0.4	-0.31	-0.58	-0.46	-1.3	-1.17	-0.83	-0.18	-3.01	-0.32	-1.24	-1.47	-1.09	-0.68	-0.37	-1.19
YBL007C_ORF	|| SLA1 || cell wall organization and biogenesis* || protein binding, bridging* || YBL007C || cytoskeletal protein binding protein || 1450420	-1.18	-0.02	0.66	-1.75	-1.89	0.34	-0.08	0.29		-1.09	-0.81	-2.82	-2.87	-0.43	-0.89	-0.62	0.42	-0.41		-1.59	-0.67	-1.03	-0.33	-1.02	-2.57	-0.44	-1.47	-0.81	-2.13	-1.1	-0.85	-0.96	-1.59	-0.55	-1.95	-1.69		0.83	0.24	-1.5	-1.76	-0.58	-1.38	-1.33	-1.61
YML022W_AAA_16_NCR	|| APT1 || AMP biosynthetic process* || adenine phosphoribosyltransferase activity || YML022W || POLYA_DS100_YML022W_chr=XIII_(229702..229801)_16:YBOX_AAA1000040 || 1450421	-1.21		2.31	-0.32	0.83	0.55	0.25			0.77		-4.34		0.53			0.28			0.38	-0.05	0.22	-0.75		1.04	2.25	0.87		1	-0.12	1.07			0.23	-0.97	-0.04		2.65			0.5	0.04	-1.16	1.22	-0.26
YOR344C_ORF	|| TYE7 || transcription* || transcription factor activity || YOR344C || 33 kDa|serine-rich protein, is a potential member of the bHLH/leucine-zipper protein family || 1450422	0.34	-1.34	1.2	-0.7	-0.73	-0.04	-2.14	0.25		-0.23	0.03		0.73	1.14	-0.11	-0.42	-1.62	-0.7		-0.52	-0.31	0.03	0.83	-1.55	-2.11	-1.01	-0.5	-0.38	-0.17	0.33	-1.02	-0.58	-2.2	0.86	0.65	-0.69		0.79	0.12	-0.75	0.35	-1.38	0.59	-0.45	0.53
YHR201C_ORF	|| PPX1 || polyphosphate metabolic process || exopolyphosphatase activity || YHR201C || exopolyphosphatase || 1450423	-0.48	0.83	0.64	-0.33	-0.25	-0.85	-0.07	0.17		-1.5	-0.37	-2.29	-0.43	1.38	-0.69	-0.86	0.4	-0.35		-0.57	-0.68	-0.4	0.11	-0.99	1.07	-0.06	-1.1	0.38	-0.2	-1.15	-1.55	-0.46	-0.52	-0.87		-0.17	-1.44	-0.01	-0.15	-2.71	-0.74	0.13	-1.08	0.23	-0.29
YLR326W_ORF	|| || biological_process || molecular_function || YLR326W || Hypothetical ORF || 1450425	-1.28			0.73	-0.05	0.66	-0.71	0.49		0.78	-1.78	-3.07		0.8	0.39	0.02	-0.69	-0.11		0.17	-0.13	-0.01	-0.3	-0.36	0.52	0.07	0.7	-0.1	0.19	-0.61	-0.1		0.29	0.22	1.02	-0.37		-0.4	-1.02	-0.24	0.24	0.14	0.12	0.19	0.53
YOL017W_ORF	|| ESC8 || chromatin silencing || molecular_function || YOL017W || Protein involved in telomeric and mating-type locus silencing, interacts with Sir2p and also interacts with the Gal11p, which is a component of the RNA pol II mediator complex || 1450426	0.65	-0.14	1.55	0.8	1.56	-0.12		3.03		0.99	2.47			2.43	-0.03	-0.53	0.42	0.36		-0.66	0.09	-0.15	-0.04	-0.36	0.66	1	0.12	0.3	-0.53	0.05	-0.37	1.5	0.71	-0.72		1.61		1.74	1.35	0.47	-0.53	-0.01	-0.84	-0.15	-0.13
YLR154C_ORF	|| RNH203 || DNA replication || ribonuclease H activity || YLR154C || Ribonuclease H2 subunit || 1450427	0.84			0.26	0.13	0.27	-0.02	1.08		0.39	0.15		0.71	0.12	-0.72	-1.94		-0.13		-0.21	0.23	0.46	0.72	0.64	-0.18	0.22	0.19	0.06	0.51	0.5	0.84	-0.3	0.16	0.57	0.81	0.5		2.16	0.82	0.6	0.45	0.07	0.73	0.28	0.68
YGR027W-B_ORF	|| || || || YGR027W-B || TyB Gag-Pol protein; proteolytically processed to make the Gag, RT, PR, and IN proteins that are required for retrotransposition || 1450428	-2.04	-3.11	-3.2	-2.58	-2.59	-0.83	-2.65	-2.8	-1.72	-2.69	-2.14	-1.76	-2.52	-2.97	-2.07	-1.17	-2.27	-2.05	-1.67	-2.35	-1.24	-1.06	-1.72	-1.56	-2.5	-3.14	-2.68	-2.78	-1.66	-2.41	-2.3	-2.5	-2.97	-0.99	-1.64	-2.7	-2.83	-3.55	-2.29	-2.32	-1.34	-0.86	-1.63	-2.08	-2.52
YJL107C_ORF	|| || biological_process || molecular_function || YJL107C || Hypothetical ORF || 1450429	0.14	1.21	1.56	0.58	-0.05	-0.4		0.46		-1.45	-1.34	-2.17	0.52	1.64	0.69	0.84	1.11	-0.35		-0.74	0.61	0.55	0.6		2.34	1	-0.09	-0.29	-0.45	-1.04	-0.79	-0.19	-1.03	0.6		-1.37		1.74	0.41	-0.45	0.32	0.52	-0.33	-0.47	-0.06
YDL209C_TIL_5_220__ORF	|| CWC2 || nuclear mRNA splicing, via spliceosome || molecular_function || YDL209C || YBOX_TIL1000107:TIL_YDL209C_CWC2_5_220 || 1450431	0.17	0.29	2.6		-0.62	0.86	0.51	-0.2		-0.02	1.23	-1.99		0.31	0.03	0.14	0.38	0.57		0.23	0.3	0.2	-0.5	-0.66	3.78	1.59	1.13	-1.32	-1.98	-0.54	0.37	0.1	1.3	0.48		-0.23		0.08	-0.2	0.36	-0.01	0.04	-0.85	0.49	0.58
YAR071W_ORF	|| PHO11 || phosphate metabolic process || acid phosphatase activity || YAR071W || acid phosphatase || 1450432	-1.32	-1.23	-0.76	-1.14	-1.08	-1.44	-1.16	-1.26	-0.96	-1.71	-1.84	-1.53	-0.52	-0.67	0.39	-0.68	-1.68	-1.06	-0.95	-1.13	-0.21	-0.42	-0.93	-0.06	-0.5	-0.65	-1.61	-0.77	-0.56	-0.7	-1.12	-1.48	-1.42	-0.93	-1.25	-1.45		-0.76	-1.16	-0.84	-0.76	-0.41	-0.31	-1.29	-0.66
TK(CUU)C_TRNA	|| || || || tK(CUU)C || YBOX_TRN1000004:TRN_TK(CUU)C_SGDID:S000006615_Chr_III_RC_tRNA_1 || 1450433	-0.45	-0.07	0.04	0.12	0.28	-1.42	-0.46	-0.19		-1.13	-0.66	-1.09	-0.18	-0.33	-1.27	-0.33	-0.27	-1.04		0.07	-1.38	0.09	-0.92	-0.57	-0.06	-0.08	0.4	0.23	-0.41	-0.21	-0.32	-0.04	0.22	-0.71	-0.69	-1.22		0.02	-1.15	-0.75	0.12	-0.9	0.46	-0.96	-1.16
YBL042C_ORF	|| FUI1 || uridine transport || uridine transporter activity || YBL042C || uridine permease || 1450434		2.16	0.29	-1.02	-0.77	-0.71	0.17	-1.68		0.74	0.39	-1.83	0.18	-0.87	-0.25	-0.29	-0.48	-0.77		-0.01	-0.02	0.35	0.53	-1.18	-0.44	0.17	-0.92	-1.61	-0.36	-0.29	-0.73	-0.08	-0.63	-0.37		-0.82		0.77	-0.15	0.03	0.12	-0.07	-1.22	-1.09	-0.31
YMR111C_ORF	|| || biological_process || molecular_function || YMR111C || Hypothetical ORF || 1450435	-0.73	-0.8	0.49	-1.04	-1.38	-0.16		1.35		1.23	-0.2	-2.93	-0.92	0.46	-0.66	-1.21		-0.31		-0.59	0.1	0.9	-0.32	0.2	-0.72	0.82	0.01	0.56	-0.51	-0.53	-0.33	-1.84	0.55	-0.37		0.38		2	-0.36	-0.1	-0.07	0	-0.54	-1.01
TR(CCU)J_TRNA	|| HSX1 || || || tR(CCU)J || YBOX_TRN1000025:TRN_TR(CCU)J_HSX1_SGDID:S000006707_Chr_X_tRNA_1 || 1450436	-0.91	0.47	3.24	-0.27	0.39	-1.36		1.79		-1.09	1.62	-5.09	1.08		-0.4	-0.3		1.29		-0.43	-1.7		0.1		-1.2	0.57	-2.2	0.01	-0.29	-1.01	-0.41	1.84	-0.1	-1.72		-1.83		1.04	-0.97	-0.09		0.9		0.25	0.81
YNR046W_ORF	|| TRM112 || tRNA methylation || zinc ion binding* || YNR046W || Protein required for cell viability || 1450437	0.02	-0.86	-0.61	-0.49	0.09	-0.06	-1.1	-2.44		0.24	-0.66	-0.41	0.64	-0.55	-0.18	-0.39	-2.06	0.11	-1.81	-0.84	0.55	-0.12	0.26	0.55	-0.94	-0.64	-0.57	-0.49	-0.38	0.44	-0.83	-1.03	-1.41	0.32	0.45	0.2		-0.1	1.28	-0.17	0.2	-0.3	0.34	0.06	0.6
YJL142C_ORF	|| || || || YJL142C || Hypothetical ORF || 1450438	-0.43	2.48	-0.42	-0.41	-2.66	1.48	-0.55			-1.37	-0.34			-0.58	-0.06	-0.25	0.94	1.12		-0.64	0.98	-0.12	-0.51	-0.16	-2.71	0.84	0.01	-0.38		0.12	0.7	-0.04		1.4		-0.2	-1.23	1.04	-0.63	-0.23	0.63	-0.14	-0.35	0.69	-0.05
YNL267W_ORF	|| PIK1 || sporulation (sensu Fungi)* || 1-phosphatidylinositol 4-kinase activity || YNL267W || phosphatidylinositol 4-kinase || 1450439	-1.06			-0.95	-0.7	-1.1	-1.73	0.78		-0.69		-3.61	0.88	1.34	-0.98	0.92	0.19	-0.28		-0.39	-0.17	-0.85	-0.53	-1.82		-0.29	-0.91	-0.43	-0.97	-0.78	-0.52	1.76	-0.66	-0.84		-1.58		0.52	0.18	-1.12	0.96	-0.81	-1.69	-0.79	-0.86
YDR433W_ORF	|| || || || YDR433W || Hypothetical ORF || 1450440	-1.12	-1.82	-1.91	-1.23	-1.61	-1.5	-2.25	-1.93	-0.98	-1.64	-1.64	-2.01	-0.88	-1.57	-0.55	-0.86	-0.84	-1.12	-0.35	-1.37	-0.36	-1.19	-1.14	-0.25	-0.04	-1.93	-1.59	-1.28	-1.49	-0.78	-1.34	-1.51	-1.41	-1.07	-0.92	-1.21	-0.17	-1.87	-2.72	-1.45	-0.67	-1.22	-0.54	-1.1	-0.84
YNL095C_ORF	|| || biological_process || molecular_function || YNL095C || Hypothetical ORF || 1450441	1.32	0.29	3.74	1.43	0.97	-0.23	1.15	2.88		0.22	0.79					0.91	-0.22	0.24		1.27	1.01	1.08	0.92	-2.17	0.88	2.14	1.08	-0.1	0.66	0.16	0.93	1.39		0.74		0.7		1.86	1.13		0.17	0.87	-0.46	0.47	1.1
YDR261C_ORF	|| EXG2 || cell wall organization and biogenesis || glucan 1,3-beta-glucosidase activity || YDR261C || exo-1,3-beta-glucanase || 1450442	-1.01	-1.61	-1.44	-1.35	-0.89	-0.02	-0.4	-0.72		-0.71	-1.05	-1.49	-0.82	-1.11	-1.06	-1.18	-0.81	-1.32		-0.54	-0.68	-0.01	-0.35	-1.08	-1.47	-1.27	-0.88	-1.68	-0.88	-0.44	-0.95	-1.66	-1.06	-0.12	-3.16	-1.93		0.09	-0.42	-1.58	-0.44	-0.46	-0.71	-1.17	-1.08
YKL077W_ORF	|| || biological_process || molecular_function || YKL077W || Hypothetical ORF || 1450443	-0.67	-3.54	0.31	-1.73	-1.25	-0.91	0.03	-2.41		-2.46	0.12	-3.41	0.76	1.79	-0.07	-0.85	-1.08	-0.46		-0.48	-0.02	-0.51	-0.59	0.23	-0.6	-0.26	-1.07	1.22	0.44	-0.29	-0.29	0.76	-2.64	-0.36	-0.78	-0.67	0.06	0.76	-1.1	-0.09	-0.46	-0.07	-0.08	-0.63	-0.16
YMR089C_ORF	|| YTA12 || translation* || ATPase activity* || YMR089C || ATPase|CDC48/PAS1/SEC18 (AAA) family || 1450445	-0.23		-0.77	-1.99	-0.71	-0.84	-0.41	-1.3		-1.44	-1.51	-1.84	-0.56		-0.12	-0.71	-1.33	-1.27		-1.9	-0.42	-0.81	-1.87	-0.61	-0.6	0.82	-1.75	-0.92	-3.02	-0.88	-2.56	-4.08		-0.65		-1.52	-2.42	0.58	-1.26	-1.2	-0.96	-0.31	-1.53	-1.47	-1.27
YOR003W_ORF	|| YSP3 || telomere maintenance* || peptidase activity || YOR003W || subtilisin-like protease III || 1450446			2.04		1.61	0.6	1.68	0.16		0.68	1.61	-2.8		0.34	0.71	1.08	1.31			1.43	0.17	0.72	0.27		1.98	2.36	1.33			-0.23	1.28			-0.18		-0.02		1.59		0.55	0.21	1.5	-0.03	-1.51	-0.04
YKR004C_JXN_EI_1_ORF	|| ECM9 || cell wall organization and biogenesis || molecular_function || YKR004C || YBOX_JXN1000068:JXN_EI_1_YKR004C:NC_001143:complement(447414..447493) || 1450447		1.74		-0.88	-1.45	-0.03	0.41	2.31		0.76	2.34		0.44	2.31	0.6	0.27				-0.03		1.15	-2.64	-0.74	-1.17	0.66	0.57	0.31	-0.6	-0.1	0.94	-2.39	1.35		-4.78	-1.38		2.58		1.77	0.96	0.11	0.57
YLR361C_ORF	|| DCR2 || traversing start control point of mitotic cell cycle || hydrolase activity, acting on ester bonds || YLR361C || Protein involved in cell cycle regulation || 1450448	-0.01	0.42	2.57	1.04	2.59	0.64		0.41	2.37	1.46	0.3	0.9	1.7	1.08	-0.15	0.19	-0.25	0.99	-0.06	0.44	0.12	0.06	1.77	0.24	0.32	2.72	0.99	-0.9	0.77	0.18	1.99	1.46	2.05	-0.01	-3.17	1.25	-0.91	2.87	1.29	0.18	-0.63	0.77	1.99	1.83	1.77
YOL052C_ORF	|| SPE2 || pantothenate biosynthetic process* || adenosylmethionine decarboxylase activity || YOL052C || S-adenosylmethionine decarboxylase || 1450450	-0.43	3.86	-0.35	1.13	-0.03	0.42	-0.26	0.17	-2.43	-0.19	-0.26	0.12	0.73	-0.1	0.11	-0.14	0.03	0.81		-0.06	1.06	-0.06	-0.01	0.38	0.2	-0.18	-0.18	0.57	-0.49	0.9	-0.65	-0.16	0.47	0.04		-0.58		-0.02	-0.54	-0.16	-0.57	-0.5	-0.05	0.6	0.05
YBR200W_ORF	|| BEM1 || establishment of cell polarity (sensu Fungi)* || protein binding* || YBR200W || SH3-domain protein that binds Cdc24p, Ste5p and Ste20p, and the Rsr1p/Bud2p/Bup5p GTPase || 1450451	-1.07	0.3		-0.19	0.4	-0.12	0.91	0.2		-0.39	-0.41	-2.31	-0.36	-1.48	-0.3	-0.75	-0.23	-0.93		-0.05	-0.57	0.36	-0.1	-1.49	-1.91	-0.56	-1.56	-0.3	-1.59	-0.39	-1.11	-0.11	0.06	-0.12		-1.88	-2.51	-0.28	0.7	-0.58	-0.13	-0.32	-0.78	-0.45	-0.67
YPR038W_OCH__ORF	|| || || || YPR038W || YBOX_OCH1000212:YPR038W_YPR038W_SGDID:S0006242_Chr_XVI_646833-647192_Dub_ORF_69_0 || 1450452	0.41	1.53	0.51	1.48	0.99	1.66		1.59		1.23	2.69	-2.17		1.83		-0.7		0.41		1.79	0.44		0.06	1.19	2.95	2.2	1.93	-0.08	0.53	-0.66	1.05	1.43	0.92	0.94	-0.72	0.28		0.8	0.02			0.27	1.11	0.79	0.84
YKR028W_ORF	|| SAP190 || G1/S transition of mitotic cell cycle || protein serine/threonine phosphatase activity || YKR028W || type 2A-related protein phosphatase || 1450453				-3.97		-0.7	-0.55				-0.48				-0.94	-1.26	-1.66	-2.26		-1.89	-1.21	-1.16	-2.34	-2	-0.03		0.39	-0.75	-1.81		-1.56	-0.19	-1.21	-1.43		-2.28		0.31			-1.03	-0.99	-1.19		-1.3
YGL124C_ORF	|| MON1 || protein targeting to vacuole* || molecular_function || YGL124C || Protein required for fusion of cvt-vesicles and autophagosomes with the vacuole; associates, as a complex with Ccz1p, with a perivacuolar compartment; potential Cdc28p substrate || 1450454	0.39	1.07	1.28	1.04	0.9	-0.15	0.72	1.81		1.36	-0.17	-2.75	0.47	-0.99	-0.35	0.07	1	0.18		0.2	-0.34	0.41	-0.2	-0.88	0.91	1.78	1.7	0.07		0.22	1.57	0.5	1.66	0.39	-0.95	1.94		0.37	0.96	-0.65	-0.27	0.27	0.59	0.99	-0.23
YLR185W_INT_1	|| RPL37A || translation || structural constituent of ribosome || YLR185W || YBOX_INT1000218:INT_1_YLR185W:NC_001144:522672..523030 || 1450455	0.84	-0.03	-0.54	0.41	-1.27	0.66	0.6	1.47		0.72	0.83	-0.26		1.41		-0.61		0.86	1	0.07	0.59	1.25	1.1	1.07	2.98	-0.07	-0.06	0.13	0.62	0.45	0.94	0.44	0.58	0.04	0.99	1.51		-0.52	1.24	0.47	0.91	0.15	1.41	1.13	1.91
YLR093C_INT_1	|| NYV1 || vesicle fusion* || v-SNARE activity || YLR093C || YBOX_INT1000216:INT_1_YLR093C:NC_001144:complement(327260..327400) || 1450456	0.72	1.39	2.4	0.58	0.49	0.83	1.11	1.82		0.64	0.16	-2.26	0.64	1.88	-0.22	-0.08	-0.24	-0.08		0.97	0.53	1.04	-0.48	0.43	-0.89	0.84	0.96	-1.73	0.88	-0.91	0.57	0.08	0.76	0.86		0.02		1.06	0.21	-1.01	0.59	0.31	0.87	0.71	0.56
YAR050W_OCH__ORF	|| FLO1 || flocculation via cell wall protein-carbohydrate interaction || mannose binding || YAR050W || YBOX_OCH1000011:YAR050W_FLO1_SGDID:S0000084_Chr_I_203394-208007_Ver_ORF_517_0 || 1450457	-0.91	-1.67	-0.36	0.23	-0.42	-0.82	0.78	-1.37		-0.63	-0.28	-0.57	-1.13	-0.32	-0.31	-0.61	-0.46	-0.1	-2.71	-0.43	-0.19	0.14	0.62	-1.59	0.47	-1.25	-0.37	-0.52	-0.12	0.27	-0.33	-1	-0.43	-0.49	-0.83	-0.74		0.07	0.13	-0.08	-0.53	-0.73	0.06	-0.43	-0.24
YBR178W_ORF	|| || || || YBR178W || Hypothetical ORF || 1450458	0.68		3.16				1.56			-1.49	1.91	-3.37	1.65		-2.37	-0.5	-2.87	0.38		-0.37		0.55			-0.65	2.23		-2.01	-0.07	-0.81	-1.49			-0.4		-1.29		2.54	1.42		1.15	-0.05	0.45	1.14	-0.36
YGR110W_ORF	|| || biological_process || molecular_function || YGR110W || Hypothetical ORF || 1450459	0.85	2.73	1.25		0.99	-1.61				0.93	0.8	-7.16	1.39	1.89	0.35	0.37	1.14	0.42			-0.07			-0.68	-1.6	2.37	0.97	1.66	0.16	-0.14	2.45	0.59	1.45	0.46		0		1.54	1.27	0.22		1.29	0.42		-0.58
YLL034C_ORF	|| RIX7 || ribosomal large subunit export from nucleus || ATPase activity || YLL034C || Putative ATPase of the AAA family, required for export of pre-ribosomal large subunits from the nucleus; distributed between the nucleolus, nucleoplasm, and nuclear periphery depending on growth conditions || 1450460	-1.24	-1.42		-1.71	0.32	-1.5	-0.63	-0.05		-0.13	-0.79	-0.8	0.4	-3.14		-0.13	1.73	-0.24		-1.86	-0.54	-0.72	-0.71	-1.07	2.91	0.49	-1.2	-1.43	-1.25	-1.65	0.26	-3.83	0.83	-0.68		0.1		2.45	-0.45	-1.15	-1.15	-0.33	-1.36	-1.44	-0.54
YDL141W_ORF	|| BPL1 || protein amino acid biotinylation || biotin-[acetyl-CoA-carboxylase] ligase activity* || YDL141W || biotin:apoprotein ligase || 1450461	-1.47	-0.13	1.5	-1.11	-0.36	-1.33	0.83	0.05		-0.4	-0.67	-3.63	0.81	-0.87	-1.06	-1.27	-2.2	-1.36		-1.7	-0.52	-0.37	-0.42	-1.5	-2.07	-1.09	0.01	-1.55	-0.77	-1.53	-0.69	0.21	0.18	-1.08	-3.98	-1.12		0.49	0.49	-1.03	0.68	0.2	-1.3	-1.02	-0.08
YIL016W_ORF	|| SNL1 || protein folding* || chaperone regulator activity || YIL016W || 18.3 kDa integral membrane protein || 1450462	0.54	-0.03	1.76	-0.75	0.59	0.2	0.23	1.88		-0.6	-0.37	-1.28	0.97	-0.49	-0.46	-0.81	-0.51	-0.68		-0.32	-0.3	0.4	0.33	1.02	2.8	-0.12	0.34	-0.13	-0.14	0.39	0.58	-0.06	1.11	-0.28	1.02	1.06		0.22	0.25	0.4	0.49	-0.03	1.07	0.24	0.71
YDR471W_INT_1	|| RPL27B || translation || structural constituent of ribosome || YDR471W || YBOX_INT1000114:INT_1_YDR471W:NC_001136:1401791..1402174 || 1450463	0.59	-2.88	0.64	0.52	0.42	0.93	0.47	0.67		0.83	0.16		0.86	1.19	-1.58	0.89	0.38	0.6		0.99	0.49	1.27	0.38		4.3	0.07	0.85	1.48	1.27	0.07	-0.84	-0.85	1.08	1.13	2.04	0.94		0.45	-0.99	0.9	0.88	0.5	0.95	0.78	0.9
YMR296C_ORF	|| LCB1 || sphingolipid biosynthetic process || serine C-palmitoyltransferase activity || YMR296C || serine palmitoyltransferase component || 1450464	-1.2	0.19		-1.06	-0.3	-0.56	-0.73	-2.02		-1.24	-0.26	-1.15	-1.06	0.04	0.04	-0.69	-0.24	-0.09		-0.81	0.25	-0.3	0.12	-0.7	-1.88	-0.19	-2.27	-0.57	-0.43	-0.02	-0.77	-1.09	-0.97	-0.12	-0.82	-1.4		0.39	0.98	-0.55	-0.78	-0.68	-0.67	-0.8	-0.85
YDL106C_ORF	|| PHO2 || transcription* || transcription factor activity || YDL106C || homeobox transcription factor|positive regulator of PHO5 and other genes || 1450465	-0.1	0.45	0.51	-2.9	-0.54	-0.61	1.22	0.88		-0.05	1.01	-3.55	0.45	0.9	-0.89	-1.17	-0.93	-0.91		-0.36	-0.17	0.13	0.02	-2.34	-2.81	-0.09	-0.82	-0.49	-1.63	-1.13	-1.23	-1.48	0.61	-1		0.09		-0.43	0.72	-1.03	-0.04	0.52	-0.59	-0.98	-0.61
YOR210W_ORF	|| RPB10 || transcription from RNA polymerase II promoter* || DNA-directed RNA polymerase activity || YOR210W || RNA polymerase II core subunit || 1450466	0.76	-0.66	-1.08	-0.51	-0.63	0.48	-0.62	-0.87		0.43	-0.93	0.8	0.38	-0.3	0.28	-0.6	-0.75	-0.06	-0.39	-0.32	0.43	0.22	0.1	0.68	2.51	-0.93	-0.59	0.04	0.15	0.28	-0.55	-1.15	-1.08	0.09	0.38	0.43	-1.52	-1.12	0.37	0.18	0.17	-0.36	0.68	0.2	0.44
YGR088W_ORF	|| CTT1 || response to stress* || catalase activity || YGR088W || catalase T || 1450467		2.85	2.47	0.26	1.02			2.16		1.4	1.54	-3.04			-0.07	-0.06		0.02		0.18	-0.81	0.65	0.68		-2.02	2.2		-1.01	0.27	-0.47	1.08	0.8	1.31	0.02		-0.5		1.44	-2.91	0.63	0.32	0.48	-0.86	0.94	0.43
YPL194W_ORF	|| DDC1 || meiosis* || molecular_function || YPL194W || DNA damage checkpoint protein, part of a PCNA-like complex required for DNA damage response, required for pachytene checkpoint to inhibit cell cycle in response to unrepaired recombination intermediates, may respond to replication defects || 1450469	-2.2	0.72	-3.98	-1.04	-1.2	-0.25	-0.57	0.99		-0.24	-0.33	-1.32	-0.07	-1.29	-0.48	-1.06	-0.91	-0.53		-1.08	-0.64	-0.14	-0.57		-1.83	1.24	-0.61	-2.03	0.06	-1.17	-0.76	-0.06	-0.61	-0.17		-0.48		-0.15	0.27	-0.7	-0.04	0.57	-1.2	-0.7	-0.45
IGR_CHR12:(364506..364831)_227	|| || || || || YBOX_IGR1000204:gLR06_15:gLR06_15:chr12.fsa:(364506..364831):326:bp._227_0 || 1450470	-1.13	1.94				-0.07	-0.63	0.32		0.75				0.05	0.44	0.63	0.48	0.65		0.78	-0.35	0.21	-0.56	-1.77	1.27	0.13	-0.06		0.58	-0.04	0.87	0.09		0.71		-0.4		-0.4	2.12	-1.06	-0.12	0.46	-0.45	1.01
YKR063C_ORF	|| LAS1 || establishment of cell polarity (sensu Fungi)* || molecular_function || YKR063C || May regulate expression of genes involved in bud formation and morphogenesis || 1450471	-6.07	0.57	2.73	-0.43	-0.57	-0.76	0.25	0.93		-0.82	1.1	-2.91	-0.69	0.01	-0.59	0.16		-1.1		-0.47	-0.29	0.1	-0.35	-0.59	1.19	-0.23	-2.24	-2.67	-1.54	-1.44	-0.61		0.21	0.12		-0.38		1.47	-1.5	-0.71	-0.66	-0.15	-0.28	-0.25	-0.29
YOR188W_ORF	|| MSB1 || establishment of cell polarity (sensu Fungi) || molecular_function || YOR188W || Protein involved in positive requlation of both 1,3-beta-glucan synthesis and the Pkc1p-MAPK pathway, potential Cdc28p substrate; multicopy suppressor of temperature-sensitive mutations in CDC24 and CDC42, and of mutations in BEM4 || 1450472	-0.84		-0.05	-1.39	-1.96	-0.5	-2.42	-1.44		-0.74	-0.22	-2.18	-0.05	-1.67	-2.05	-1.67	-1.35	-0.94		-1.54	-0.14	-0.83	-0.79	-1.69	-2.32	-1.56	-1.59	0.21	-1.66	-1.11	-1.58	-0.46	-0.36	-1.04		-1.05		-0.74	0.72	-3.04	-0.88	-1.02	-1.24	-0.96	-0.72
YHR045W_ORF	|| || biological_process || molecular_function || YHR045W || Hypothetical ORF || 1450474	0.7		1.02	0.3	-0.83	-0.23	0.68			-0.04	-0.62				0.19	-0.43	-0.91	-0.24		-0.46	-0.13	-0.2	-2.06	-0.7	-1.01	-0.12	-0.41	-1.57	-1.34	-0.38	0.69	0.19	0.59	-0.25		-1.46		0.29	0.57	-0.26	-0.27	-0.29	-0.75	-0.29	-1.39
YLR020C_ORF	|| YEH2 || cell wall mannoprotein biosynthetic process* || sterol esterase activity || YLR020C || Hypothetical ORF || 1450475	-0.48	-1.54	-0.1	-0.93	0.11	-1.42	0.1	0.07		-0.66	-0.78		-0.9	0.98	-2.65	-0.31	0.47	-1.36		-2.08	-0.62	-0.09	-0.78	-0.36	0.76	0.74	0.25	-1.19	-0.47	-1.31	-0.7			-1.23		-2.07			-2.07	-0.82	-0.44	-0.31	-0.68	-0.46
YPR145W_ORF	|| ASN1 || asparagine biosynthetic process || asparagine synthase (glutamine-hydrolyzing) activity || YPR145W || asparagine synthetase || 1450476	-1.57	-1.56	-1.83	-1.26	-2.21	-1.27	-2.5	-3.59	-3.67	-1.65	-1.39	-1.13	-1.54	-1.65	-0.55	-1.05	-0.33	-0.95	-1.62	-1.64	-1.05	-1.17	-0.99	-1.54	-1.96	-1.53	-1.84	-1.71	-1.76	-0.63	-1.3	-1.41	-1.53	-1.32	-1.86	-2.18	-1.83	-1.99	-1.79	-1.92	-1.34	-1.69	-0.96	-0.97	-1.68
YIL051C_ORF	|| MMF1 || mitochondrial genome maintenance* || molecular_function || YIL051C || Maintenance of Mitochondrial Function || 1450477	-0.18	-0.89	-1.35	-0.74	-1.27	0.33	-1.52	-1.73	-0.29	0.21	-0.68	0.26	-1.59	-2.09	0.41	-0.61	-0.96	0.59	0.1	-0.23	0.72	-0.31	-0.24	0.76	-2.32	-1.12	-0.58	-0.84	-0.57	-0.48	-0.12	-0.54	-0.52	0.03	0.61	0.32	0.33	-0.92	-0.66	-0.76	-0.63	-0.1	0.63	0.68	0.1
YEL069C_OCH__ORF	|| HXT13 || hexose transport || glucose transporter activity* || YEL069C || YBOX_OCH1000042:YEL069C_HXT13_SGDID:S0000795_Chr_V_23231-21537_RC_Ver_ORF_0_0 || 1450478				0.09	2.38		1.95			0.44					-0.12	-1.04							0.3					-0.72		0						-0.35						0.74	0.21
YDL136W_OCH_DS100_ORF	|| RPL35B || translation || structural constituent of ribosome || YDL136W || YBOX_OCH1000224:DS100_YDL136W_YDL136W_Chr04_(218368..218467)_100_bp._1_0 || 1450479	0.39	-0.64	-0.98	-0.99	-1.08	0.64	-1.17	-0.89	0.99	0.24	-0.88	1.19	-0.63	-0.43	-0.01	-0.77	-1.56	0.06	0.69	-0.1	0.03	0.27	-0.49	0.27	1.3	-0.64	-0.07	0.11	-0.51	0.43	-0.64	-0.85	-0.82	-0.63	1.23	0.61	-3.5	0.09	-0.58	0.23	0.29	-0.53	0.58	0.35	0.41
YBL058W_ORF	|| SHP1 || telomere maintenance* || protein phosphatase type 1 regulator activity || YBL058W || isolated as a suppressor of the lethality caused by overexpression of the phosphoprotein phosphatase 1 catalytic subuniut encoded by GLC7 || 1450484	-0.64	-0.28	0.15	0.09	-0.29	-0.25	0.11	1.93	-1.55	0.07	-0.7	-1.09	1.53	0.13	0.02	-0.05	0.26	0.26		-0.72	0.39	-0.42	-0.11	0.35	0.74	-0.27	-0.73	-1.19	0.34	-0.14	0.04	-0.2	-0.04	-0.02	-3.12	-0.96	-0.42	-1.25	0.54	-0.36	-0.49	-0.14	-0.48	-0.52	-0.79
YGR118W_INT_1	|| RPS23A || translation* || structural constituent of ribosome || YGR118W || YBOX_INT1000152:INT_1_YGR118W:NC_001139:727043..727362 || 1450485	0.56	0.84	1.18	-0.01	1.86	0.99	1.29	-1.2		0.92	-0.39	-0.68	-0.36	1.01	-0.4	0.56	-0.44	0.1		1.02	0.48		0.29	1.04	1.97	0.43	1.3	0.04	0.52	0.25	1.01	0.79	0.27	-0.01		1.37		1.23	1.07	1.17	0.58	0.64	1.32	0.39	0.39
IGR_CHR13:(711077..711608)_0	|| || || || || YBOX_IGR1000215:gMR08_7:gMR08_7:chr13.fsa:(711077..711608):532:bp._0_0 || 1450486	-0.64	0.41	1.23	-1.33	-2.1	-1.77	-0.82	-0.61			0.38	-2.74	0.12	2.43	-0.82	-1.92	-2.07	-2.23		-2.37	-0.91	-1.5	0.06	-3.74	-0.12	1.05	-1.97	-0.08	-2.57	-2.38	-0.74	1.77	-1.36	-1.51		-2.31		-0.15	-0.73	-3.32	-1.94	-1.32	-2.56	-1.73	-1.61
YIR002C_ORF	|| MPH1 || DNA repair || RNA helicase activity* || YIR002C || RNA helicase that influences the mutation rate of nuclear and mitochondrial genomes || 1450487	-1.34	1.69	0.28	-0.41	-0.98	-0.85	0.85	1.36		-0.28	0.47	-2.24		-0.89	-0.87	0.54	-0.6	-0.61		-1.23	-0.54	-0.5	-0.4	-2.45	0.84	-0.74	-0.58	-2.72	-0.7	-2.17	-1.01	-0.05	-0.21	-0.86		-0.73		0.91	-0.54	-0.18	1.83	0.21	-1.67	-1.18	-0.6
YHR080C_ORF	|| || biological_process || molecular_function || YHR080C || Hypothetical ORF || 1450488	1.01	0.62	1.05	1.89	1.94	0.32		1.45		2.23	1.96	-1.9	0.41	-0.71	0.04	-0.48	0.14	0.58		0.73	0.38	0.46	1.22	0.19	-0.63	0.93	2.14	0.6	0.34	0.57	2.18	1.28	0.75	0.77		3.13		-0.57	-0.25	0.01	0.7	0.87	0.81	1.05	2
YHR217C_ORF	|| || || || YHR217C || Hypothetical ORF || 1450489	-0.01	0.2	-1.05	0.62	-0.14	2.5	-0.76	2.54		-1.36	0.52	-2.6	-0.35	-1.69	-1.36	-0.45		1.34		-1.15	0.27	-0.66	0.33	-0.03	-0.96	0.04		-0.93	-0.02	-0.26	-0.6	-1.04	-0.16	1.42	-0.34	-0.38		0.28	-0.29	-3.7	1.37	0.22	-0.64	-0.09	-1.02
YFL033C_ORF	|| RIM15 || protein amino acid phosphorylation* || protein kinase activity || YFL033C || trehalose-associated protein kinase related to S. pombe cek1+ || 1450490	-0.54	1.39	-1.95	-1.18	0.51	1.81	0.01	1.02		-0.34	-2.12	-3.93		1.33	-1.02	0.59	-0.61	0.57		-1.17	0.83	-0.47	0.2	-2.16	-3.01	-0.01	-0.89	-0.4	-0.69	-2.03	-0.42	0.93	-0.63	1.26		-1.91		0	-0.45	-1.04	0.47	-0.36	-1.43	1.03	-1.53
YHLCOMEGA1_LTR	|| || || || YHLComega1 || YBOX_LTR1000013:YHLCOMEGA1:SGDID:S000006986:Chr:VIII:8224-7993_RC_31 || 1450491	-0.57	0.61	2.24	-0.72	-0.57	-1.08	0.76	1.34	-1.17	-1.18	0.3	-3.08	-0.29		0.59	0.29		-0.93		-1.33	-0.04	-0.16	-0.76	-0.16	-0.71	-0.26	-0.43	-0.35	-0.48	-0.49	-0.51	0.49	-0.61	-0.76		-1.2	-2.99	0.58	-0.41	-1.24	-0.55	-0.05	-0.62	-0.34
YGR295C_ORF	|| COS6 || biological_process || molecular_function || YGR295C || Protein of unknown function, member of a family of conserved, often subtelomerically-encoded proteins || 1450492	-0.04	0.66	2.89	-0.77	-1.09	-0.42	-0.08	0.45	-1.16	-0.79	-0.05	-1.42	-1.12	0.59	0.97	0.43	0.34	0.84	-2.03	0.9	0.85	-0.29	-0.41	0.13	-0.08	-0.74	0.45	1.15	0	0.32	-0.3	0.16	-0.91	-0.28	-3.93	-0.74	0.06	-0.14	-0.85	1.34	0.02	0.03	-0.21	-0.1	-0.52
RDN18-1_RRNA	|| RDN18-1 || || || RDN18-1 || YBOX_RRN1000001:RRN_RDN18-1:RDN18-1:SGDID:S000006482:Chr:XII:457733-455934:RC:rRNA_1297 || 1450493	2.7	3.66	3.04	2.88	3.96	2.26	1.85	3.75	4.02	4.01	4.65	1.74	1.33	2.84	0.69	1.33	1.62	2.41	3.3	2.57	0.52	1.57	3.09	3.09	0.84	3.27	4	2.92	2.57	2.27	4	3.7	3.43	2.29	2.93	2.65	3.54	2.02	3.12	2.13	1.8	2.29	3.64	2.82	3.5
YER027C_ORF	|| GAL83 || protein amino acid phosphorylation* || AMP-activated protein kinase activity || YER027C || Glucose repression protein || 1450494	-1.02	0.32	-1.44	-0.69	0.13	-0.77	-0.46	-0.41		-0.99	-0.49	-2.03	-0.52	-1.06	0.45	-0.57	0.03	-0.25		-0.67	-0.4	-0.15	-0.17	-0.38	-1.77	-0.69	-0.56	-0.79	-0.83	-0.84	-0.65	-0.57	-0.14	-0.37		-1.36	0.4	-0.22	-0.55	-0.35	-0.26	-0.13	-0.66	-0.43	-0.73
YNL133C_ORF	|| FYV6 || telomere maintenance* || molecular_function || YNL133C || Protein of unknown function, required for survival upon exposure to K1 killer toxin; proposed to regulate double-strand break repair via non-homologous end-joining || 1450495	0.64	0.2	2.59	0.65	1.05	0.51		-0.14		0.9	0.79		-0.16	-1.11	0.03	-0.36	-0.31	-0.2		-0.54	-0.29	0.26	0.89	0.61	1.96	1.33	0.7	-1.22	0.5	-0.88	1.16	-2.93	-0.21	0.29		0.88		0.1	0.4	0.25	-0.06	0.78	0.49	-0.02	1.1
YMR127C_ORF	|| SAS2 || chromatin silencing at telomere || H3/H4 histone acetyltransferase activity* || YMR127C || zinc finger protein || 1450496	-0.31	2.99	1.95	0	0.28	0.34		3.05		0.36	2.88	-2.8				0.33	0.92	0.02			0.11		0.84			-0.26	-0.13	-0.39	-0.18	-0.47	1.07		-0.13	-0.68				1.46	1.42		0.03	0.07	0.29	-0.94
YJL193W_ORF	|| || biological_process || molecular_function || YJL193W || Hypothetical ORF || 1450497			1.53		0.06	-0.03	0.98	1.48		0.95	-0.4			1.1	-0.07	0.49	1.11	0.59		-0.55	-0.52	0.32	0.02	-3.13	-1.78	-1.18	0.79	0.48		-0.84	-1.18	0.75	0.66	-1.11		-0.47		-0.07	1.41		-0.38	-0.11	-0.01	-0.76	-1.19
YDR397C_JXN_EI_1_ORF	|| NCB2 || positive regulation of transcription from RNA polymerase II promoter* || transcription coactivator activity* || YDR397C || YBOX_JXN1000038:JXN_EI_1_YDR397C:NC_001136:complement(1266812..1266888) || 1450498	0.33	0.12	-1.17	0.06	-0.1	0.07	0.42	-0.15		0.38	0.67	-1.9	0.23			0.48	-0.95	-0.61		0.2	0.41	0.69	0.29	0.58	2.86	0.23	-0.04	0.68	1.35	0.4	0.05	1.07	-0.83	1.17	0.33	1.14	0.19	-1.78	0.96	1.98	0	-0.1	0.87	0.25	0.54
YER062C_ORF	|| HOR2 || response to osmotic stress* || glycerol-1-phosphatase activity || YER062C || DL-glycerol-3-phosphatase || 1450499	-1.63	-2.51	-2.06	-2.09	-1.41	-1.67	-0.2	-1.8	-5.51	-1.74	-1.69	-0.82	-1.38	-1.97	0.63	-1.3	-0.92	-1.69		-1.27	-1.7	-0.5	-1.7	0.1	-1.74	-1.9	-1.94	-1.71	-1.65	-0.83	-1.83	-2.09	-1.7	-2.02		-2.46	-0.33	-3.05	-1.3	-1.59	0.08	-0.14	-0.24	-1.17	-0.83
YJL158C_ORF	|| CIS3 || cell wall organization and biogenesis || structural constituent of cell wall || YJL158C || similar to Hsp150p and Pir1p, Pir2p, and Pir3p || 1450500	-1.43	-1.89	-0.98	-0.74	0	-0.4	-1.51	-1.43	-1.49	-0.6	-1.59	-0.09	-0.88	-1.6	-0.35	0.63	0.13	-0.25	-0.5	-0.71	0.36	-0.91	-0.37	0.53	-2.36	-1.13	-0.97	-0.99	-0.69	-0.46	-1.52	-1.32	-1.32	-0.29	-0.69	-0.64	0.11	-0.49	-0.67	-0.83	-0.61	-0.65	-0.04	-0.23	-0.47
YDR381C-A_OCH__ORF	|| || biological_process || molecular_function || YDR381C-A || YBOX_OCH1000037:YDR381C-A_YDR381C-A_SGDID:S0007650_Chr_IV_1238840-1238815,1238620-1238302_RC_intron_removed_Unc_ORF_97_0 || 1450502	1.09	0.86	0.77	2.81	1.89	1.13	0.76	1.64	-0.59	2.71	1.62	-0.68	1.02	-0.72	0.48	0.59	1.08	1.61	1.73	2.1	0.85	0.43	1.4	1.23	0.67	1.97	2.3	0.58	0.59	1.37	2.21	1.69	1.87	0.78	2.25	3.69	0.77	-0.11	0.47	-0.3	0.82	0.93	2.36	1.58	2.22
YDR277C_ORF	|| MTH1 || signal transduction* || molecular_function || YDR277C || Msn3p homolog (61% identical) || 1450503	0.3		1.06	0.71	0.52	1.45	0.24			0.09			0.03				0.87	0.81	-0.8	1.26	0.59	0.14	-0.23	0.2		1.39				-0.25	-0.91	0.7	0.53	1.49	1.38	1.12	0.21	0.68	1.53	-0.33	1.26	0.18		1.3	0.49
YBL093C_ORF	|| ROX3 || transcription from RNA polymerase II promoter || RNA polymerase II transcription mediator activity || YBL093C || RNA polymerase II holoenzyme/mediator subunit || 1450504	0.99	2.28	3.38	0.58	2.07	0.49	-0.33	1.49		1.45	0.81	-0.57	0.85	1.21	-0.04	0.9	1.65	0.78	-2.06	0.55	0.35	0.28	0.19	0.76	1.34	1.28	0.95	0.43	0.79	0.47	1.59	1.89	1.47	0.84	0.68	0.86		1.38	-0.03	0.81	0.3	-0.11	0.06	0.75	2.01
YKL002W_INT_1	|| DID4 || protein retention in Golgi* || protein binding || YKL002W || YBOX_INT1000264:INT_1_YKL002W:NC_001143:437481..437548 || 1450505							2.47			-2.39												0.84			2.11											-0.11					1.2	0.61	0.02		-1.11
YBR009C_ORF	|| HHF1 || chromatin assembly or disassembly || DNA binding || YBR009C || histone H4 (HHF1 and HHF2 code for identical proteins) || 1450506	-0.1	-1.15	-1.61	-0.65	-0.63	-0.21	-1.82	-1.59	-0.3	-0.66	-0.87	0.91	-0.78	-1.09	0.22	-0.53	-1.23	-0.17	0.14	-0.41	-0.22	-0.39	-0.28	0.81	1.4	-0.25	-0.35	-0.65	-0.69	-0.18	-1.26	-1.17	-0.89	0.19	-0.35	-0.27	0.68	-0.17	-0.9	-0.3	-0.24	-0.72	0.59	0.05	0.21
YKL150W_ORF	|| MCR1 || response to oxidative stress* || cytochrome-b5 reductase activity || YKL150W || NADH-cytochrome b5 reductase || 1450507	-0.07	-1.47	-0.7	-0.52	-0.89	0.33	-1.44	0.17		-0.1	-0.78			0.74	-0.19	0.25	0.21	0.52		-0.51	0.63	-0.47	-0.48	0	-2.88	0.9	-0.41	0.18	0.81	0.01	-1.64	-1.27	-0.67	-0.48		-1.07	-0.11	1.28	0.39	-0.34	-0.07	-0.39	0.01	-0.59	-0.79
YNL305C_ORF	|| || biological_process || molecular_function || YNL305C || Hypothetical ORF || 1450508		1.57	1.41	0.4	0.17	-0.61	1.15	3.44		0.48	1.92				0.65	0.19	1.17	0.56		0.36	0.2	0.02	-0.13	-0.46	-1.64	-0.14	0.12	0.34		-0.15	-0.79	0.66	0.99	-0.3		0.12	0.16	1.02	1.55	0.7	0	0.45	0.22	0.13	0
YJR144W_ORF	|| MGM101 || DNA repair* || DNA binding || YJR144W || mitochondrial nucleoid protein || 1450510	-0.32	-0.18	0.37	-0.63	0.11	0.08	-0.54	0.84		-0.76	0.27		-0.7	1.64	0.37	-0.53	-0.71	0.23	-1.17	-0.67	0.62	-0.29	-0.29	0.47	0.98	-0.2	-0.77	-0.52	0.06	-0.33	-0.43	0.23	-1.02	0.38	-0.73	-0.03	-0.25	1.67	-0.41	-0.3	0.2	-0.12	0.11	0.32	0.53
YCR001W_ORF	|| || || || YCR001W || Hypothetical ORF || 1450511	0.46	2.71	2.55	0.78						0.54	2.59	-3.98			-0.91	-1.02		0.72		1.28		0.73	-0.48		0.23			-3.97		-1.97	1.92	2.59		0.39		-1.98		2.17	-0.63			1.01		1.78
YOR019W_ORF	|| || biological_process || molecular_function || YOR019W || Hypothetical ORF || 1450512	0.21	2.18	0.65	1.96	1.74	1.08		2.08		2.55	2.07				0.67	1.28	2.31	1.38		1.64		0.79	1.24	0.26	2.29		1.1	0.12	1.09	0.9		1.66	2.08			1.78			1.07	1.77	-0.08	0.62	0.12	1.43	2.25
YKL115C_ORF	|| || || || YKL115C || Hypothetical ORF || 1450513	-0.67	2.65	1.84	0.42	0.72	-0.28	0.14	0.05		-0.79		-2.03		1.7		0.62	1	0.64		0.21	-0.45	0.82	0.22	-1.69	-0.08	0.74	-0.3	-0.57	-0.19	-0.39	0.32	-0.05	0.66	-0.35	-0.8	-0.9		1.2	0.56	-0.18	-0.84	-0.33	0.16	-0.37	0.49
YLR377C_ORF	|| FBP1 || gluconeogenesis || fructose-bisphosphatase activity || YLR377C || fructose-1,6-bisphosphatase || 1450515		1.27	1.62							0.18						-0.68		-1.13			-0.57		0.26		-0.11			-0.09		-2.86				-0.78		-0.26		1.48			0.18		0.32		-0.02
YDR484W_ORF	|| VPS52 || Golgi to vacuole transport* || protein binding || YDR484W || May interact with actin as a component or controller of the assembly or stability of the actin cytoskeleton || 1450516	0.23	1.13	1.71	1.11	0.74	-0.13				0.98	1.62	-5.97	-0.26	0.48	-0.5	-0.06	1.51	-1.04		-0.9	-0.62	-0.88	0.66	-1.4	-2.04	0.99	-0.08	0.48	-0.12	-1.27	-0.64	-1.13	0.49	-2.5	-1.39	-0.87		1.36	0.27	0.48	-0.03	-0.07	-0.74	-4.01	-0.72
YCL050C_ORF	|| APA1 || nucleotide metabolic process || bis(5'-nucleosyl)-tetraphosphatase activity || YCL050C || diadenosine 5',5'''-P1,P4-tetraphosphate phosphorylase I || 1450517	-0.93	-3.37	-1.16	-1.44	-1.28	-0.27	-1.57	-1.84		-1.61	-1.08	-2.81	-0.7	-0.77	-0.49	-1.47	0.17	-0.87		-1.8	-1.56	-1.42	-0.45	0.15	-1.99	0.24	-1.59	-1.11	-1.44	-1.13	-0.88	-0.88	0.18	-0.4	-1.03	-1.9		0.59	-1.47	-0.38	-0.81	-1.09	-0.47	-0.64	0.74
YOR247W_TIL_9_21__ORF	|| SRL1 || nucleobase, nucleoside, nucleotide and nucleic acid metabolic process || molecular_function || YOR247W || YBOX_TIL1000173:TIL_YOR247W_SRL1_9_21 || 1450518					1.99					1.28	3.38																			-1.2											0	0.69
YJR109C_ORF	|| CPA2 || arginine biosynthetic process || carbamoyl-phosphate synthase (glutamine-hydrolyzing) activity || YJR109C || carbamyl phosphate synthetase || 1450519	-1.26	0.24	-1.2	-1.46	-1	-2.09	-0.78	-0.27		-0.65	-0.81	-2.27	-0.64	-0.35	-0.79	-0.87	-1.58	-0.37		-1.34	-0.88	-1.05	-0.83	-1	-1.83	-1.53	-1.57	-1.21	-0.69	-1.71	-1.3	-2.64	-0.5	-1.27	-6.2	-1.39		0.11	-0.14	-0.79	-1.37	-0.98	-1.46	-0.53	-2.85
YBR044C_ORF	|| TCM62 || protein complex assembly || unfolded protein binding || YBR044C || chaperone (putative) || 1450520	-0.12	2.6	2.23	-0.37	0.43	0.03	0.93	0.87		0.4	-1.53	-5.85	-0.88	0.79	-0.01	-0.27	0.33	-0.43		-0.14	-0.76	-0.07	0.51	-1.21	-0.95	0.3	0.6	0.42	-1.66	-0.73	0.2	1.43	1.02	-1.81		-1.09			0.91	0.03	-0.16	0.67	-0.62	0.43	-0.2
YDR449C_ORF	|| UTP6 || ribosome biogenesis and assembly* || snoRNA binding || YDR449C || U3 snoRNP protein || 1450521	0.16	0.01	-0.21	-1.25	-0.07	-1.3	0.44	0.15		-0.38	0.33	-3	0.04	0.55	-1.1	-0.58	-1.32	-0.93		-1.05	-0.88	0.3	0.26	-1.46	0.84	0.77	-0.9	-0.69	-1.04	-0.85	-0.57	-0.62	-1.27	-0.93	-4.27	-0.29		-1.17	0.74	-0.69	0.45	-0.1	-0.51	-1.14	1.43
YKR101W_ORF	|| SIR1 || chromatin silencing at silent mating-type cassette* || DNA binding* || YKR101W || silent mating loci repressor || 1450523			1.5	-0.45	0.93	-1.27				1.44	0.26				-1.01		-0.66	0.18		0.98	-2.04		-0.74		-0.66	0.99	1.65	1.84		-0.49	1.84			-0.15		-0.54		2.17	1.9	-0.56	1.49	0.63	-2.64		-0.03
IGR_CHR13:(COMPLEMENT(492186..492357))_81	|| || || || || YBOX_IGR1000106:NMR032C:NMR032C:chr13.fsa:(complement(492186..492357)):172:bp._81_0 || 1450524			2.26			-0.56	0.97	4.58		-2.55	2.27	-3.2	-0.89	1.37	-0.39	-0.46	-0.53	0.18		-2.38	-1.89	0.35			-1.05	0.99	-1.5			-0.87		2.21		-0.43		-1.69		1.65	0.61		0.48	0.73	-0.78
YMR230W-A_ONO_ORF	|| || biological_process || molecular_function || YMR230W-A || YBOX_ONO1000094:YMR230W-A_YMR230W-A_SGDID:S0028576_Chr_XIII_733267-733455_Unc_ORF_8 || 1450525	0.19	0.47	2.19	-1.84	0.63	0.54	0.5	1.79		0.11	1.6	-2.2		1.05		-0.09	0.1	-0.43		-0.38	-0.35	0.62	0.43		-0.55	1.53	0.79	-0.51	-0.06	-0.2	0.45		0.03		0.97	-0.51		2.17	0.56	1.17	0.28	0.05	-0.67	-0.22	0.44
YPL025C_ORF	|| || || || YPL025C || Hypothetical ORF || 1450526	0.41	0.29	0.89	0.29	0.79	0.7	-0.63	0.3		0.59	0.37	-1.67	0.16	0.75	0.21	-0.26	-0.06	0.43	-1.43	0.1	0.59	-0.53	0.03	0.17	0.93	0.73	0.12	-0.19	0.01	0.4	-0.43	-0.48	0.17	0.62	0.92	1.03	-0.74	0.89	0.92	-0.2	0.28	-0.26	0.75	0.48	0.57
TI(AAU)B_TRNA	|| || || || tI(AAU)B || YBOX_TRN1000031:TRN_TI(AAU)B_SGDID:S000006600_Chr_II_tRNA_0 || 1450527	-0.19	0.45	0.88	1.95	1.59	-0.93	0.37			-0.76	1.59	-0.69	-0.4	1.73	-0.75	0.29	-0.39	-0.12		0.3	-0.66	0.11	-0.03	-1.04	-0.32	0.99	1.42	0.05	-0.14	0.09	0.15	0.28	1.18	0.55		0.41	-4.02	-0.01	-0.93	-0.35	0.24	-0.2	-0.29	-0.01	-1.34
YML007W_ORF	|| YAP1 || response to drug* || transcription factor activity || YML007W || jun-like transcription factor || 1450528	0.46	1	-0.97	0.55	-0.62	-0.02	-0.92	-0.16		0.03	1.12	-2.02	-2.29	0.84	-0.31	-0.2	0.02	-0.34		-0.03	-0.38	-0.1	-1	-0.33	-1.08	-0.53	-0.24	-0.51	-0.87	-0.44	-0.33	-0.3	0.33	-1.04	-0.73	-0.53	-1.62	-0.76	0.21	-0.55	-0.93	-0.54	-0.46	-0.63	-0.85
YBR251W_ORF	|| MRPS5 || translation || structural constituent of ribosome || YBR251W || ribosomal protein S5 (putative) || 1450529	0.15	0.36	2.06	-0.7	-0.15	0.35	1.69	0.85		0.24	0.73	-3.79	1.56	0.17	0.16	-0.77	0.61	0.07		-0.81	-1.2	0.21	0.05	0.06	0.1	-2.06	-0.29	0.27	-1.01	-1.04	-0.58	0.89	1.32	-0.5		-1.88	-0.53	1.55	-0.02	-0.82	0.59	0.66	-0.41	0.67	-1.18
YGR126W_ORF	|| || biological_process || molecular_function || YGR126W || Hypothetical ORF || 1450530	-0.19	-0.56	0.58	-0.34	0.12	-0.06	0.49	-4.18		-2.52	-1.45	-1.52	0.04	-0.01	-0.15	-0.09	-0.21	-0.96		0.61	0.3	0.4	0.48	0.37	-1.63	-1.65	-0.8	-1.57	-0.2	0.47	0.46	-1.48	-0.74	-0.04	-0.12	-1.15		1.18	-0.23	-1.22	0.81	0.26	0.23	-0.84	-1.62
YMR030W-A_ONO_ORF	|| || biological_process || molecular_function || YMR030W-A || YBOX_ONO1000089:YMR030W-A_YMR030W-A_SGDID:S0028574_Chr_XIII_337312-337602_Unc_ORF_116 || 1450531	0.32	1	2.15	-0.75	1.26		0.68			-0.43	-0.05	-2.87	0.91		-2.22	-1.12	-0.41	-0.08		-0.31	-1.03		-0.02		-1.71	0.83	0.21	-0.07	-3.77	-1.5		0.61		-0.96		-0.81		2.12	1.13	-0.48	0.37	-0.15		0.82	1.4
YGL175C_ORF	|| SAE2 || meiotic DNA double-strand break processing || molecular_function || YGL175C || Involved in meiotic recombination and chromosome metabolism || 1450532	-0.43	0.96	0.28	-0.11	0.03	-0.23	1.01	1.06		0.06	-0.29	-3	0.37	2.29	-0.36	-0.72		-0.52		-0.5	0.46	0.4	-0.06	-0.25	-0.03	0.84	0.08	-0.02	0.12	-0.8	0.25	1.49	-1.64	0.64		-0.66		1.46	0.44	0.31	0.09	0.26	-0.13	-0.86	0.12
YBR216C_ORF	|| YBP1 || response to oxidative stress || molecular_function || YBR216C || redox regulator || 1450533	-0.41	-0.02	0.96	0.55	-1.4	-0.67	1.42	1.22		-0.77	-2.97	-2.83	0.67	1.57	-0.17	0.23	-0.19	0.28		-0.65	-0.12	0.06	-0.26	-0.84	-0.32	0.26	-1.37	-0.27	-0.57	-0.81	-0.67	-2.77	-1.16	-1		-2.18		1.51	-0.98	-1.32	-0.09	-0.02	-1.11	-0.73
YPL232W_ORF	|| SSO1 || sporulation (sensu Fungi)* || t-SNARE activity || YPL232W || t-SNARE || 1450534	1.94	3.43	-0.69	0.27	-0.1	0.17	-0.07	-0.56	-1.66	-0.22	0.38	-0.34	0.05	3.96	1.38	0.28	-0.43	0.28	2.78	-0.05	0.93	-0.05	-0.18	1.25	0.9	-0.18	0.02	0.96	-0.79	-0.28	-0.09	-0.67	-0.4	0.54	-1.46	-0.17	2.2	0.7	0.65	2.74	0.28	-0.1	2.32	0.33	-0.16
YNL012W_JXN_EI_1_ORF	|| SPO1 || meiosis || phospholipase activity || YNL012W || YBOX_JXN1000006:JXN_EI_1_YNL012W:NC_001146:609750..609829 || 1450535							1.93				3.1	-2.4											0.25					-0.04		-0.77		2.37						2.52	1.41			0.9
YML042W_ORF	|| CAT2 || carnitine metabolic process || carnitine O-acetyltransferase activity || YML042W || carnitine O-acetyltransferase || 1450536		2.59	1.42	0.31	1.63	0.58	0	1.77		0.48	1.34	-1.97	0.85		0.01	0.22	0.58	-0.23		0.52	0.06	0.65	0.79	-0.58	-0.85	1.36	0.53	0.45	0.9	-0.12	0.74	1.03	0.14	0.31		1.06	-1.1	1.76	0.54	-0.68	0.32	0.09	-0.2	1.01	1.41
YOR054C_ORF	|| VHS3 || G1/S transition of mitotic cell cycle* || phosphopantothenoylcysteine decarboxylase activity* || YOR054C || Gene whose overexpression suppresses the synthetic lethality of the hal3 sit4 double mutation || 1450537	0.66	1.81		0.58	-0.83	0.67		0.81		0.42	1.37		0.99	-0.33	-0.36	-0.31	0.28	0.5		-1.23	-0.04	0	-0.33	-0.18	2.12	-0.41	-0.17	-1.53	-0.1	0.38	0.46	0.18	1.56	-0.03		1.01	-1.21	1.27	0.53	-0.75	-0.1	1.11	-0.4	1.09	0.46
YDL192W_ORF	|| ARF1 || telomere maintenance* || GTPase activity || YDL192W || ADP-ribosylation factor || 1450538	-0.46	-1.7	-1.72	-0.51	-1.2	0.67	-1.27	-1.01	0.22	-0.06	-1.06	0.24	-1.33	-1.09	0.99	-0.36	-1.09	0.61	0.12	-0.74	0.48	-0.54	-0.73	0.95	1.12	-0.72	-0.88	-0.94	-1.13	-0.58	-1.14	-0.92	-1.4	0.35	0.41	0.06	0.35	-1.11	-0.71	-0.53	0.85	-0.28		0.91	0.24
YDR108W_ORF	|| GSG1 || ER to Golgi vesicle-mediated transport* || molecular_function || YDR108W || Subunit of TRAPP (transport protein particle), a multi-subunit complex involved in targeting and/or fusion of ER-to-Golgi transport vesicles with their acceptor compartment; protein has late meiotic role, following DNA replication || 1450539	-0.8	0.07	0.87	-0.98	-0.97	-0.2		-2.84		-0.04	-0.78	-2.4		-0.46	0.07	2.59		0.2		-0.62	0.19	0.17	-0.42	-0.97	-0.56	-0.21	0.65	-0.34	0.13	-0.58	-0.7	-0.4	-0.29	1.11		-0.61		-0.79	0.47	0.24	-0.06	0.76	-1.99	0.37	-0.1
YKR079C_ORF	|| TRZ1 || removal of tRNA 3'-trailer sequence || purine nucleotide binding* || YKR079C || Protein required for cell viability || 1450540	0.23	3.04		-3.02	-1.06	-1.23		-0.15				-2.67	1.48	2.01	-1.26	-0.69	-1.39	-1.06		-1.23	-0.46	-0.35	-0.07	-1.9	-0.86	0.38	-1.84	-0.11	-1.15	-0.74	-1.23	-1.08	-0.37	-1.06		-1.26		1.38		-1.55	-0.72	-0.57	-1.06	-0.07	-0.48
YDL157C_ORF	|| || biological_process || molecular_function || YDL157C || Hypothetical ORF || 1450541	0.77	0.64	-0.53	1.25	0.73	0.07	0.25	-0.14	-0.7	0.86	1.46	-1.82	0.14	-0.69	-0.01	-0.48	-0.82	0.41	-1.29	0.1	-0.28	0.53	0.25	0.59	1.55	0.77	0.59	0.14	-0.28	-0.49	0.73	-0.11	0.04	0.31	0.78	1.14	0.01	0.01	0.47	0.16	0.24	-0.03	0.71	0.12	-0.09
YPR011C_ORF	|| || transport || transporter activity || YPR011C || Hypothetical ORF || 1450542	0.23	3.28	2.49		1.54	0.73	0.76	2		1.78	1.55	-1.73			-0.07	0.77		0.59		0.94	0.59	0.18		-1.25	0.52	0.16	0.76	-0.01		-0.14	1.49	2.01	2.5	0.99		1.89		1.77	0.64	-0.3	0.12	0.66	-0.49	0.54	0.74
YOR226C_ORF	|| ISU2 || iron ion homeostasis* || molecular_function || YOR226C || Iron-sulfur cluster nifU-like protein || 1450543	0.07	-0.23	-0.19	0.23	-0.4	0.18	-1.31	-1.25	-4.11	-0.53	-0.33	-0.28	-0.16	-0.02	-0.08	-0.33	-0.44	-0.04	-0.71	0.02	0.57	-0.23	-0.44	0.6	0.96	-0.53	-0.59	-0.24	0.59	0.14	-0.39	-0.2	-0.3	0.59	-0.5	0.33		-1.71	-1.15	0.4	-0.73	-0.34	0.35	0.35	0.16
YHR143W_TIL_4_12__ORF	|| DSE2 || cell wall organization and biogenesis* || glucan 1,3-beta-glucosidase activity || YHR143W || YBOX_TIL1000134:TIL_YHR143W_DSE2_4_12 || 1450544	-0.18	-0.53	-1.35	-0.07	-0.2	0.03	-2.03	-0.6	0.32	-1.68	-0.65	-0.63	-0.82	0.43	0	0.14	-0.66	-0.08	0.36	-0.62	0.64	0.05	-0.89	-0.19	-1.63	-1.47	-1.06	-0.1	-0.65	0.37	-1.02	-0.48	-1.45	0.22	0.24	-0.68	-0.25	-0.41	-0.51	0.11	-0.19	-1.45	0.06	-0.4	-0.5
YLR208W_ORF	|| SEC13 || ER to Golgi vesicle-mediated transport* || structural molecule activity || YLR208W || nuclear pore complex subunit|protein involved in release of transport vesicles from the ER || 1450545	-1.23	-1.26	0.35	-1.48	-1.31	-0.71	-1.94	0.08	-3.63	-0.82	-1.24	-0.78	-1.71	-2.14	0.67	0.07		-0.33	-0.33	-1.33	-0.44	-0.79	-0.3	0.65	-1.23	-0.56	-1.4	-1.18	-1.19	-1	-1.29	-1.05	-1.21	-0.21	-1.39	-0.98	0.36	-0.68	0.56	-0.34	-0.26	-0.69	-0.08	-0.52	-0.84
SNR62_SNORNA	|| SNR62 || || || snR62 || YBOX_SNO1000022:SNO_SNR62_SNR62_SGDID:S000006453_Chr_XV_RC_snoRNA_6 || 1450546	-2.38	1.16	1.17	0.17	-0.15	-3.24	-0.24	0.24		-3.66	-0.39	1.86	0.15	2.19	-1.63	0.51	-1.11	-2.54		-0.83	-2.86	-0.48	-3.19	-1.83	-1.18	-0.68	-0.37	0.63	-0.84	-0.82	-1.02	-0.45	-1.6	-2.73	-3.12	-2.58	-5.33	0.78	-0.71	0.3	-0.17	-1.23	-0.52	-2.29	-2.32
YGR161C_ORF	|| RTS3 || protein amino acid dephosphorylation || protein phosphatase type 2A activity || YGR161C || Hypothetical ORF || 1450547	0.67	1.83	-1.6	0.42	0.95	0.5				-1.12	0.51	-3.06	0.64	0.17	-0.35	-0.62	-0.54	0.46			0.11	0.1	0.56	1.09	-1.98	0.66	0.94	-2.9		-1.17	-0.59	0.99	1.76	-0.02		-0.44	0.07	1.57	0.81	-1.1	0.58	-0.06	0.69	0.48	0.09
YDL240C-A_ORF	|| || || || YDL240C-A || Hypothetical ORF identified by homology. See FEBS Letters [2000] 487:31-36. || 1450548	0.59	0.45	0.81	0.13	0.33	-0.12	-0.37	2.42	-3.69	0.26	0.62	-0.88	-0.22	1.76	0.06	0.05	0.04	-0.57	-2.52	1.05	-0.1	0.52	0.6	0.25	2.89	0.67	0.25	0.25	0.62	0.2	0.69	1.17	0.9	-0.46	0.04	0.75	-2.08	2.38	1.18	0.67	0.06	-0.09		-0.11	0.72
YLR036C_ORF	|| || biological_process || molecular_function || YLR036C || Hypothetical ORF || 1450549	1.02	0.82	1.28	-0.1	0.07		1.47	3.22		1.41	2.33	-1.76	1.72	2.21	0.84	0.54	0.45	0.27		0.78	1.72	0.63	-0.09	-0.2	0.61	1.32	0.22	0.32	0.45	-0.32	-0.64		-0.25	0.48		1.71		1.53	0.1	1.57	0.5	0.74	0.2	0.43	0.71
YIR018W_ORF	|| YAP5 || positive regulation of transcription from RNA polymerase II promoter* || RNA polymerase II transcription factor activity || YIR018W || bZIP (basic-leucine zipper) protein|transcription factor || 1450550	0.28	0.87	1.32	0.94	0.78	1.11	1.22	-2.62	-1.1	0.76	-0.01	-0.7	0.74	1.38	0.91	1.12	0.48	-0.26		0.96	1.1	1	0.94	1.14	0.27	0.35	0.59	0.95	1.12	1.38	-0.23	1.42	1.08	0.4		0.04	-0.28	-0.43	1.59	1.53	0.21	0.3	0.84	-0.31	1.67
YIL067C_ORF	|| || biological_process || molecular_function || YIL067C || Hypothetical ORF || 1450551	-0.17	1.2	0.59	-0.48	0.46	-0.92	1.7	1.48		0.72	2.13	-3.38		0.87	-1.03	-0.73	-0.86	-0.52		-0.93	-0.56	-0.16	-0.59	-1.15	0.2	1.44	0.21	-1.2	1.03	-0.91	-1.14	1.21	-0.37	-1.12		0.12			0.35	-0.66	-0.42	0.34		-0.92	0.36
YFL049W_ORF	|| SWP82 || chromatin remodeling* || transcriptional activator activity || YFL049W || Hypothetical ORF || 1450552	-1.2	-2.17	1.82	-0.99	-1.15	-0.68		1.47		-0.72	-1.15	-1.57		0.25	-0.22	-0.8		0.29		-1.24	-0.07	0.41	0.29	-0.08	-1.22	-0.08	-1.41	-0.39	0.14	-0.57	0.39	-2.94	-1.22	-0.01	-1.49	-1.45	-1.37	0.1	1.12	-0.99	-0.64	0.25	-0.07	-0.5	-0.27
YOR261C_ORF	|| RPN8 || ubiquitin-dependent protein catabolic process || molecular_function || YOR261C || proteasome regulatory particle subunit || 1450555	-0.56	0.95	-0.78	-0.77	-0.14	0.95	-1.97	-0.21	-0.46	-0.17	-1.35	-0.18	0.27	-1.2	0.08	-1.2	-1.94	-0.54	-0.8	-0.71	-0.29	-1.36	-0.69	0.66	0.27	0.39	-0.93	-0.05	-1.36	0.32	-1.46	-0.84	-1.42	-0.42	-1.45	-0.72	0.92	0.6	-1.66	-0.85	-0.27	-0.52	-0.08	-0.81	-0.05
YER100W_ORF	|| UBC6 || ER-associated protein catabolic process* || ubiquitin-protein ligase activity || YER100W || ubiquitin-conjugating enzyme || 1450558	-1.03	-1.28	0.73	-1.11	-0.4	-0.43	0.52	-3.11		0.17	0.33	-2.8	0.14	0.84	-0.56	-1.65	-1.42	-0.79		-1.16	-0.26	-0.47	-0.68	0.17	-0.65	-0.58	-1.33	-1.31	-0.89	-0.85	-0.94	-0.09	-0.54	-0.17		0.94	-1.37	0.5	-1.16	-0.69	-0.94	-0.21	-0.68	-0.5	1.01
YLR071C_ORF	|| RGR1 || transcription from RNA polymerase II promoter || RNA polymerase II transcription mediator activity || YLR071C || RNA polymerase II holoenzyme/mediator subunit|interacts with Sin4p, Gal11p, and a 50 kDa polypeptide || 1450559	1.1	-0.55	0.58	-1.7	0.04	-0.93	-0.44	-0.89		-1.16	-0.01	-2.81	1.2	1.78	-3.67	-0.94	-1.49	-0.63		-2.94	-0.78	-0.01	-0.27		-2.31	-1.33		-4.36	-0.99	-1.63	-1.99	-2	-1.22	-0.98		-1.88		0.27	-3.77	0.52	0.03	-0.53	-0.92	-1.07	-1.04
YPR196W_ORF	|| || biological_process || molecular_function || YPR196W || nuclear protein (putative) || 1450560	0.33	1.18	1.34	0.9	0.77	0.19	0.52			-0.91		-2.78		2.33	0.44	0.96	1.3	0		0.24	0.26	1.05	0.24	-1.28	0.14	1.08	0.93	0.61	0.35	0.98	0.59	2.02	0.13	0.37		1.27		1.26		-0.55	-0.36	0.68	-0.6	0.39	0.66
YJL024C_ORF	|| APS3 || vesicle-mediated transport* || molecular_function || YJL024C || sigma3-like subunit of the yeast AP-3 complex which functions in transport of alkaline phosphatase to the vacuole via the alternate pathway, suppressor of loss of casein kinase 1 function || 1450561	0.69	2.25	0.25	-0.28	-0.08	0.71	1.07	1.52		0.7	0.89	-1.77	0.62	3.18	0.62	0.1	1.24	1.04	-0.9	0.59	-0.11	0.5	0.38	1.37	-0.27	0.16	0.24	-0.27	-0.39	0.23	0.8	0.49	0.56	-0.24		-0.17	0.66	1.4	0.54	0.69	0.42	0.21	1.19	1.06	0.85
YNL050C_INT_1	|| || biological_process || molecular_function || YNL050C || YBOX_INT1000025:INT_1_YNL050C:NC_001146:complement(534874..534964) || 1450562			2.15				0.15			0.5	2.12	-2		2.81			-1.21			0.18		0.88	1			-0.47	0.9	-0.45		-3.7		2.42				0.46			1.39		1.04	0.66			0.61
YGL006W_ORF	|| PMC1 || calcium ion homeostasis* || calcium-transporting ATPase activity || YGL006W || Ca2+ ATPase (putative) || 1450563	-0.97	2.17	1.39	-0.98	-0.3	-0.58	0.04	-0.44			1.42				-0.49	-0.91	-1.02	-0.85		-1.12	0.04	-0.34	-0.59	-3.24	-1.72	0.48	0.65	-1.11	0.3	-1.09	-1.05		-0.28	-0.56		-1.12		1.94	0.48	-0.09	-0.3	0.59	-1.57	-0.26	-0.59
YDR143C_ORF	|| SAN1 || response to stress* || ubiquitin-protein ligase activity || YDR143C || transcriptional regulator (putative) || 1450564	-0.94	0.76	-1.54	-0.23	0.1	0.6	1.08	-0.18		-0.12	0.22	-0.44	0.19	0.54	-1.1	-0.15	-1.29	0.5		0.4	0.54	-0.12	0.27	0.49	-2.05	0.36	0.41	0.23	-0.18	0.17	-0.93	-0.2	0.85	-0.44		0.33		-0.63	-0.04	0.92	0.37	0.23	0.01	0.54	0
YMR200W_ORF	|| ROT1 || cell wall organization and biogenesis* || molecular_function || YMR200W || membrane protein (putative) || 1450565	-0.1	-0.2	-0.55	-0.3	-0.39	0.05	-1.01	-0.36	-4.34	-0.74	-1	-0.39	0.96	-0.25	0.02	-0.38	-0.63	0.12	-2.75	-1.04	0.38	0.04	-0.3	0.07	-0.68	-0.46	-0.72	-0.27	-0.66	0.51	-0.6	-1.92	-3.88	-0.55		-1.12	0.29	0	-0.75	-0.36	-0.85	-0.83	-0.08	-0.25	-0.11
YHR096C_ORF	|| HXT5 || hexose transport || glucose transporter activity* || YHR096C || hexose transporter || 1450566					0.28					1.92		-3.2			-1.74	-0.25		0.2										0.21	-1.49	-0.84	0.73							2.02	0.34			1.67		1.66	0.56
YJR010W_ORF	|| MET3 || methionine metabolic process* || sulfate adenylyltransferase (ATP) activity || YJR010W || ATP sulfurylase || 1450567	0.15	1.09	2.87	0.07	0.37	0.15	0.56	3.18		-0.27	0.81	-1.95		1.29	-0.46	-0.23		-0.43		0.37	0.02	0.26	0.28	0.03	-0.88	2.32		0.45	-0.27	-1.04	0.64	0.87	1.57		-0.99	0.06		1.78	1.38	1.48	0.15	-0.07	-0.91	-1.79	-0.03
YMR178W_ORF	|| || biological_process || molecular_function || YMR178W || Hypothetical ORF || 1450572	-0.59	0.8	-3.44	-0.61	-0.62	0.26	-0.14	-0.87		-0.2	-0.72	-1.59	0.54	0.92	0.38	-0.48	0.05	0.41	-2.91	-0.64	-0.28	-0.22	-0.17	0.4	0.06	-0.8	-1.28	-0.43	-1.14	-0.36	-1.4	-1.8	-0.47	-0.68		-1.79	0.33	-0.24	-1.16	-0.3	-0.22	-0.2	-0.01	-0.95	-0.25
YER039C-A_AAA_26_NCR	|| || biological_process || molecular_function || YER039C-A || POLYA_DS100_YER039C-A_chr=V_(complement(228262..228361))_26:YBOX_AAA1000113 || 1450573		2.08	3.65		0.88			1.59			1.8	-7.25	1.04		-4.67	-0.39		0.35			-1.26				-2.09		0.17	0.85		-2.29	1.71	0.61	-1.01	-0.4		0.05		-0.33	1.59		-0.81	-0.03	0.01
YNL149C_ORF	|| PGA2 || mitochondrion organization and biogenesis* || molecular_function || YNL149C || Protein required for cell viability || 1450574	0.19	-0.26	-0.27	-0.38	-0.78	0.07	-0.34	-0.01		-0.1	-0.75		-2.31	0.39	0.37	-0.53	1.35	-0.32	-1.33	-0.4	0.29	-0.07	-0.16	0.91	3.61	-0.56	-0.71	-0.84	0.47	0.5	-0.63	-1.09	-0.76	0.57	-0.94	0.04	-0.27	1.05	-0.38	-0.03	0.18	0.39	0.66	0.18	1
YDR315C_ORF	|| IPK1 || inositol metabolic process || inositol or phosphatidylinositol kinase activity || YDR315C || inositol 1,3,4,5,6-pentakisphosphate 2-kinase || 1450575	-1.05	0.93	0.9	-1.39	-0.2	-0.02		1.06		-0.25	0.71	-3.12	0.02	1.53	-1	0.1	-0.1	-0.65		-0.59	0.02	0.42	0	0.09	-1.12	0.9	0.1	0.52	0.19	-0.83	-0.7	0.24	0.56	0.07	-0.82	-0.39		0.12	-0.76	0.39	0.64	0.42	0.59	0.28	-0.32
YCL066W_ORF	|| HMLALPHA1 || regulation of transcription from RNA polymerase II promoter* || transcription coactivator activity || YCL066W || involved in the regulation of alpha-specific genes|transcription factor || 1450576	0.74	1.39	3.79	0.31	0.22	1	2.09	2.97		0.3	1.37	-4.24	1.1		-0.76	-0.7	4.55	0.01		0.54	0.43	1.05	-0.52	-1.6	0.55		1.06	0.1	-0.12	-0.63	0.98	0.54	0.72	0.92		0.1		1.49	-0.75	1.01	1.51	0.81	0.78	0.51	0.4
YLR450W_ORF	|| HMG2 || ergosterol biosynthetic process || hydroxymethylglutaryl-CoA reductase (NADPH) activity || YLR450W || 3-hydroxy-3-methylglutaryl-coenzyme A (HMG-CoA) reductase isozyme || 1450577	0.76	0.61	-0.22	-0.24	-1.82	-0.47	-0.09	-2.84		-0.22	0.45	-3.17	-0.01		0.04	-0.18	-0.08	-0.82		-0.68	-0.32	-0.5	-0.85	-1.13	-2.38	0.03	-1.13	-0.52	-0.62	-0.8	0.07	0.29	-0.6	-0.57		-1.52		0.13	-0.47	-1.56	-1.5	-0.25	-0.92	-0.58	-1.17
YOL141W_ORF	|| PPM2 || biological_process || C-terminal protein carboxyl methyltransferase activity || YOL141W || PPM1 homolog|carboxy methyl transferase || 1450578	1.07	2.16	-0.06	-0.31	-0.51	-0.23	0.51			-1.52	-0.63	-3		0.07	-1.3	0.21	1.02	-0.05		-1.1	0.11	0.79	0.51	-2.03	0.89	1.02	-0.89	-0.59	-0.28	-0.25	0.35		1.06	-0.12		0.4		-0.86	-0.18	-1.52	-0.67	0	-1.17	0.07	-0.27
YER078C_ORF	|| || proteolysis || metalloendopeptidase activity* || YER078C || Hypothetical ORF || 1450579	-0.26	1.67	0.61	0.06	-0.37	0.36	-0.19	1.62		-0.19	0.24	-2.29	0.33	1.49	0.51	0.28	-0.62	0.04		-1.04	0.97	-0.04	-0.4	0.02	-0.59	-0.59	-0.12	-0.18	-0.78	-1.22	0.34	-0.06	-0.14	-0.04		-0.71		0.55	-0.2	0.01	-0.86	-0.04		-0.31	0.73
YML034W_JXN_IE_1_ORF	|| SRC1 || mitotic sister chromatid segregation || molecular_function || YML034W || YBOX_JXN1000078:JXN_IE_1_YML034W:NC_001145:211531..211610 || 1450580			1.55	-0.05		0.36	-0.54	1.8		-0.63	-0.15		2.32	4.22	0.25	0	0.77	0		-1.27	0.68	0.3	0.43	-1.73	0.19	-0.48	-3.84	-0.49	0.73	-1.11	-0.45	-1.37	1.14	-0.14		-1.2	-2.52	-1.83	1.29	-0.78	-1.01	-0.31	-1.09	0.96	-0.88
YLR415C_ORF	|| || biological_process || molecular_function || YLR415C || Hypothetical ORF || 1450581	0.35			1.63	1.3																	0.7				1.18			1.47	0.43	2.89			1.36		1.14						0.62
YPR158C-D_ORF	|| || || || YPR158C-D || TyB Gag-Pol protein; proteolytically processed to make the Gag, RT, PR, and IN proteins that are required for retrotransposition || 1450582	-1.14	-3.23	-3.24	-2.47	-1.77	-1.55	-3.99	-2.48	-1.7	-2.42	-2.51	-1.77	-2.94	-2.95	-2.06	-0.64	-2.08	-1.81	-1.48	-1.93	-1.39	-2.02	-2.07	-1.75	-2.79	-2.73	-2.72	-2.62	-1.72	-2.51	-2.29	-2.14	-2.73	-2.22	-2.3	-2.54	-2.61	-3.57	-2.89	-2.2	-1.66	-1.43	-1.79	-1.9	-2.04
YNL184C_ORF	|| || || || YNL184C || Hypothetical ORF || 1450583	1.19	1.31	-0.54	0.63	0.15	0.6	0.1	0.4	-0.27	0.18	-0.7	-1.86	0.3	-0.14	0.34	-0.98	-0.38	0.77		-0.22	0.33	0.6	0.46	1.02	-0.09	-0.71	-0.74	0	-0.05	-0.01	-0.9	-0.88	0.63	0.48		0.04	0.5	-1.82	0.71	0.57	0.18	-0.15	0.7	0.89	-0.1
YDR350C_ORF	|| ATP22 || protein complex assembly || molecular_function || YDR350C || functions at a post-translational stage in assembly of F0 ATPase. || 1450584	-0.35	0.47	0.05		0.38	0.61	1.33	2.27		1.23	2.14	-3.45		-2.27	0.54	0.47	0.5	0.22		-1	0.1	0.68	1.36	-0.39	-1.09	1.88	0.71	-1.27	0.3	-0.36	1.02	1.88	-0.3	-0.13		-0.21		1.03	1.5	-0.2	0.13	0.87	0.21	-0.18	0.01
YGL041C_ORF	|| || || || YGL041C || Hypothetical ORF || 1450585										-0.44		-2.2		2.87	-1.46	-1.02				0.43			1.15	-0.07	0.04			0.44	0.33	-0.65	1.73	2.73	0.86	0.23	-1.1	0.32		2.11		1.86		1.06	0.97		2.1
IGR_CHR03:(COMPLEMENT(214804..214981))_102	|| || || || || YBOX_IGR1000024:NCR020C:NCR020C:chr03.fsa:(complement(214804..214981)):178:bp._102_0 || 1450586	-1.19			1.72	1.48		1.08	3.38		1.27		-2.13	1.47					2.08		0.87	2.39	0.46	0.77		4.17				1.2	-0.36	1.47					0.4		1.5	0.21	-0.38		0.84		2.02	0.66
YFR035C_ORF	|| || biological_process || molecular_function || YFR035C || Hypothetical ORF || 1450587	1.35	0.45	0.63	2.7	1.19	0.01	-0.62	1.52	1.88	1.63	2.5	-0.07	0.04	-0.57	0.38	1.09	0.71	0.85	1.96	2.06	-0.28	0.8	0.74	2.16	-0.07	1.87	2.54	0.66	0.96	-0.01	2.66	1.85	0.78	1.09	3.38	3.54	2.21	0.35	0.92	0.13	1.06	0.06	2.86	0.47	2.16
YDR450W_OCH__ORF	|| RPS18A || translation* || structural constituent of ribosome || YDR450W || YBOX_OCH1000038:YDR450W_RPS18A_SGDID:S0002858_Chr_IV_1359913-1359959,1360395-1360788_intron_removed_Ver_ORF_39_0 || 1450588	1.05	-0.55	-1.4	-0.78	-0.55	0.73	-1.22	-0.17	0.5	0.66	-0.66	1.46	-0.5	-0.87	1.29	0.24	-0.77	0.14	0.8	0.09	0.76	-0.48	-0.04	0.33	1.11	-0.54	-0.35	0.1	-0.38	0.28	-0.39	-0.16	-0.85	-0.04	0.99	0.92	-0.46	-0.86	0.14	0.52	-0.02	-0.11	0.92	0.15	0.64
IGR_CHR02:(283358..283565)_22	|| || || || || YBOX_IGR1000006:NBR005W:NBR005W:chr02.fsa:(283358..283565):208:bp._22_0 || 1450589				-1.66			0.64	2.45		0.39						-0.63	0.1	-0.87				0.24	-2.27			2.21	1.23		0.56		-0.94	1.53		-0.72		-0.3		0.02	0.49		-0.36	-0.39	-0.52	0.03	0.19
YPL076W_ORF	|| GPI2 || GPI anchor biosynthetic process || UDP-glycosyltransferase activity || YPL076W || Protein involved in the synthesis of N-acetylglucosaminyl phosphatidylinositol (GlcNAc-PI), the first intermediate in the synthesis of glycosylphosphatidylinositol (GPI) anchors; homologous to the human PIG-C protein || 1450590		3.12	0.9		-2.1	0.19		2.11		-0.23	1.97					0.49	1.65	0.81		0.07	0.5				-0.07	0.29	0.87	1.27	-0.08		0.31	-1.56	0.71	0.41		-0.17		-1.17		1.35		-0.01	0.74		-0.25
YDR522C_ORF	|| SPS2 || sporulation (sensu Fungi)* || molecular_function || YDR522C || Middle/late gene of meiosis || 1450591		3.04	2.61	1.69	1.45	0.11	2.06	4.22		0.36		-2.76	-0.98	2.98	-1.75	-0.67	0.98	0.92		0.06	-0.66		0.18		-0.69	2.82	-0.22	-0.04	0.03	-1.44	2.6	1.44	1.26	0.28		-0.39		1.55	0.91		1.1	1.15		-0.33
YBR090C_INT_1	|| || biological_process || molecular_function || YBR090C || YBOX_INT1000220:INT_1_YBR090C:NC_001134:complement(426511..426867) || 1450592		1.91	2.25	1.64	1.58	1.13	0.9	1.81		1	1.54	-1.01	0.46		0.58	1.34	1.95	1.3		1.59	0.53	1.43	1.2	0.84	1.82	1.34	1.9	0.78	1.01	0.96	1.49	1.12	1.15	1.05		0.97	0.8	0.38	0.76	1.58	0.95	0.14	1.33	1.35	0.45
YGL213C_ORF	|| SKI8 || protein complex assembly* || translation repressor activity || YGL213C || antiviral protein|mRNA is induced early in meiosis || 1450593	0.53	1.07	3.24	0.61	-0.98	-0.38	-0.03	1.07		1.25	1.24	-2.06	0.1	0.27	-0.26	-0.2	1.32	0.4		-0.83	-0.94	-0.51	0.67	-0.47	-0.04	1.02	0.22	0.08	-0.39	-0.46	0.5	1.02	2.25	-0.55	-2.14	-0.91		1.73	1.11	0.05	-0.4	-0.11	-0.52	-0.64
YNL081C_TIL_4_145__ORF	|| SWS2 || translation || structural constituent of ribosome || YNL081C || YBOX_TIL1000092:TIL_YNL081C_SWS2_4_145 || 1450594	0.71	0.42	0.82	0.69	-0.21	0.36	0.11	0.83		1.02	1.04	-1.66		0.37	0.01	-0.39	0.27	0.44		0.54	0.01	0.81	-0.46	-3.35	0.26	-0.11	-0.09	-0.7	0.21	0.31	0.35	0.81	-1.77	0.92	0.23	0.05	-0.45	0.14	0.67	0.63	0.81	-0.05	1.08	1.17	-0.21
YKL166C_ORF	|| TPK3 || protein amino acid phosphorylation* || protein serine/threonine kinase activity* || YKL166C || cAMP-dependent protein kinase catalytic subunit || 1450595	0.56		1.19	0.28	0.29	0.27	-1.72	1.17		0.45	0.91	-2.58	0.04	-0.51	0.29	-1.05	-0.68	0.7		-0.11	-0.23	0	0.49	-1.41	0.37	0.26	0.39	0.21	-0.24	-0.69	0.49	-0.27	0.31	0.33	-1.13	-0.41		0.28	-0.18	0.14	0.06	0	-0.47	-0.34	-1.92
YCR052W_ORF	|| RSC6 || RNA elongation from RNA polymerase II promoter* || DNA-dependent ATPase activity || YCR052W || a subunit of RSC, a fifteen-protein chromatin remodeling complex and related to the swi/snf complex. || 1450596							1.58																										1.95							3.44
YDL023C_ORF	|| || || || YDL023C || Small hydrophobic protein || 1450597	1.16	1.66	3.38	2.21	1.62	2.03	1.32	3	2.47	2.4	2.66	0.24	1.32	1.58	1.47	1.03	1.23	1.75	1.58	2.25	1.21	2.03	0.5	2.75	0.24	3	3.41	1.1	1.33	-0.07	2.29	2.19	2.8	1.56	3.31	2.98	2.55	1.19	1.15	0.58	1.05	1.21	3.19	1.61	2.31
YPR202W_OCH__ORF	|| || biological_process || molecular_function || YPR202W || YBOX_OCH1000254:YPR202W_YPR202W_SGDID:S0006406_Chr_XVI_943028-943046,943195-943892_intron_removed_Unc_ORF_11 || 1450599	-0.46	-0.68	-0.47	0.35	0.4	-0.47	-1.55	-0.54	0.24	-0.58	0	-2.16	0.04	0.85	0.69	1.38	1.02	-0.7	0.43	-0.02	1	1.04	0.36	-0.44	1.08	0.37	-0.21	-0.25	0.07	-0.32	-0.04	-0.72	-0.42	-0.24	-0.25	-0.99	-2.51	0.18	-0.51	-0.14	-0.34	-0.43	-0.18	-0.4	-0.28
YCR017C_ORF	|| CWH43 || cell wall organization and biogenesis* || molecular_function || YCR017C || || 1450601	-0.49	0.56	1.69	-0.76	-1.14	-2	0.8			-0.93	0.41	-2.59	0.42	-0.64	-0.38	-0.44	0.22	-1.49		-0.26	-0.43	-0.28	-0.21	-1.32	-0.9	-0.02	-0.44	-0.41	0.04	-0.65	-0.75	0.16		-1		-0.36		0.38	1.27	-0.46	-0.75	0.48	-1.45	-0.92	-1.25
YBR267W_ORF	|| REI1 || ribosome biogenesis and assembly* || molecular_function || YBR267W || Hypothetical ORF || 1450602	-0.54	0.26	-0.8	-0.89	-0.27	-0.38	0.91	0.64		-1.04	-0.36	-1.54	0.48	0.67	-2.37	-0.89	2.01	-0.29		-0.28	0.32	-0.14	-0.45	0.31	2.72	0.04	-0.66	-0.52	0.17	-0.37	-0.8	0.2	-0.66	-0.14	-0.07	-0.28		0.49	0.87	-0.66	-0.21	0.11		-0.2	-0.32
YBR095C_ORF	|| RXT2 || invasive growth (sensu Saccharomyces)* || histone deacetylase activity || YBR095C || Hypothetical ORF || 1450603	-0.41	1.05	0.14	-0.58	-0.45	-0.45	1.96	1.55		0.42	1		0.05		-0.67	0.26		-0.58		0.28	-0.15	0.72	1.27	-0.94	0.62	0.8	-1.04	-0.09	-1.84	-0.52	0.42	0.7	-0.99	-0.63		0.26		1.44	0.44	-1.24	1.31	0.41	-0.87	-0.1	-0.52
YDL230W_ORF	|| PTP1 || protein amino acid dephosphorylation || protein tyrosine phosphatase activity || YDL230W || phosphotyrosine-specific protein phosphatase || 1450604	-0.97	1.44	-1.75	0.17	-0.13	-0.17	0.59	-1.43		-1.16	1.28	-2.04	0.39	2.14	-0.53	-0.99		-0.71		-0.49	-0.58	0.05	-0.02	0.14	0.61	2.44	-1.26	0.12	-0.18	-0.84	-1.2		1.35	0.48	-1.23	-0.92		1.77	-0.23	-0.28	-0.64	0.45	0.01	-0.29	1.83
YML073C_OCH__ORF	|| RPL6A || translation* || structural constituent of ribosome* || YML073C || YBOX_OCH1000097:YML073C_RPL6A_SGDID:S0004538_Chr_XIII_124172-124158,123742-123227_RC_intron_removed_Ver_ORF_244_0 || 1450606	0.33	-0.39	-1.08	0.35	-0.19	0.53	-1.63	-0.08	1.21	0	-0.78	1.54	0.35	-0.71	1.21	0.32	-0.29	0.66	0.49	0.33	0.51	0.16	0.06	0.21	0.39	-0.52	0.36	1.08	0.09	1.37	-0.6	-0.03	-0.12	0.37	0.83	0.8	-0.94	-0.06	0.25	0.78	0.64	-0.09	0.89	0.59	0.29
YML058W_ORF	|| SML1 || mitochondrion organization and biogenesis* || enzyme inhibitor activity || YML058W || Suppressor of mec lethality. Ribonucleotide reductase inhibitor. || 1450607	-0.35	-0.7	-1.55	0.34	0.37	0.75	-1.47	-0.7	-0.42	-0.64	-0.38	-0.33	-0.57	-0.13	0.02	-0.32	-0.87	0.25	0.28	0.3	0.15	-0.43	-0.03	0.58	-1.3	-0.65	-0.33	0.43	-0.03	1.04	-1.28	-0.61	-0.43	0.33	-0.08	-0.2	0.94	0.17	0.36	1.12	0.19	-1.02	0.48	0.25	0.17
YJR094W-A_ORF	|| RPL43B || translation || structural constituent of ribosome || YJR094W-A || ribosomal protein L43B || 1450608	0.77	-0.73	-0.58	0.66	0.32	0.5	-0.91	-0.07	0.88	0.49	0.63	1.94	0.21	-0.62	-0.17	0.04	-0.12	0.37	1.69	0.79	0.23	0.78	0.81	0.71	3.05	-0.11	0.43	0.51	0.3	1.14	0.09	0.2	0.27	0.42	1.77	1.24	-0.11	0.58	0.3	0.36	0.32	-0.35	1.04	0.53	0.43
YPR062W_ORF	|| FCY1 || pyrimidine salvage* || cytosine deaminase activity || YPR062W || cytosine deaminase || 1450610	-0.06	-1.23	-0.83	-0.55	-0.62	0.22	-1.52	-0.26	0.23	0.52	0.11	-0.32	0.07	-0.67	-0.02	-0.46	-0.56	0.77	0.57	0.1	0.42	-0.25	0.37	0.9	4.54	-0.26	-0.56	-0.23	-0.2	0.36	-0.4	-0.32	0.92	0.64	0.84	0.49	0.23	0.36	0.19	-0.18	-0.33	-0.32	0.77	0.7	0.69
YIL140W_ORF	|| AXL2 || cellular bud site selection* || molecular_function || YIL140W || Integral plasma membrane protein required for axial budding in haploid cells, localizes to the incipient bud site and bud neck; glycosylated by Pmt4p; potential Cdc28p substrate || 1450612	-0.48	1.68	1.86	-0.66	0.15	-0.89		1.04		-0.03	0.56	-2.1		2.06	-1.35	-1.67		-0.34		-0.58	-0.75	-0.33	-1.24	-0.75	-1.7	0.46	0.35	0.12	-0.66	-1.25	0.45	-0.21	0.86	-0.81		-1.07		1.18	0.75	-0.12	-0.95	-0.13	-1.6	-0.58	-0.39
YNL015W_ORF	|| PBI2 || vacuole fusion, non-autophagic* || endopeptidase inhibitor activity || YNL015W || proteinase inhibitor I2B (PBI2) || 1450613	-0.21	-0.39	0.96	-0.36	0.75	0.49	-0.31	-1.09	0.6	-0.48	-0.46		0.35	-3.11	-0.48	-1.01	-0.43	-0.68	0.6	0.37	-0.32	-0.13	-0.24	0.61	-2.26	-0.42	-0.84	0.31	-0.25	0.66	-0.53	-0.35	0.01	0.37	-0.01	-0.5	0.37	1.28	1	0.38	0.66	0.07	0.66	0.39	0.49
YPR027C_ORF	|| || biological_process || molecular_function || YPR027C || Hypothetical ORF || 1450614	-0.45							1.57				-4.57			-0.86	-1.25	-0.05											-2.07	0.29	-0.14	-1.28	2.42						2.56	0.66						1.51
YML093W_ORF	|| UTP14 || ribosome biogenesis and assembly* || snoRNA binding || YML093W || U3 snoRNP protein || 1450615	-2.14	-0.65	0.84	-1.6	-1.58	-0.93	-1.03	-1.2		0.31			0.8	-0.25	-1.95	-0.9	-1.62	-0.47		-2.01	-1.25	-1.25	-1.08	-1.5	3.98	-0.43	-2.75	-1.07	-1.73	-0.9	-0.75	-1.06	0.13	-1.61	-2.93	-2.58		-0.12		-2.25	-1.43	-1.06	-0.98	0.14	-1.03
YPL248C_ORF	|| GAL4 || positive regulation of transcription by galactose* || transcription factor activity* || YPL248C || zinc finger transcription factor of the Zn(2)-Cys(6) binuclear cluster domain type || 1450616	0.69	2.85			0.61					-0.57	2.31	-5.58	1.39		-1.91	1.08	0.71	-0.65		-1.17		0.34	0.34		0.96	1.99		0.66	0.38		0.7	2.26		0.24		-3.42		2.24	1.46	0.74	2.08	0.65	-1.19	1.18	0.27
YHR134W_ORF	|| WSS1 || response to DNA damage stimulus* || molecular_function || YHR134W || weak suppressor of smt3 || 1450617	0.87	1.56	0.93	0.14	0.61	0.97	0.82	1.66		1.06	1.3	-0.54	-0.83	1.29	0.01	-0.29	0.78	0.97		0.86	0.07	0.4	0.59	-3.24	2.54	1.76	1.02	-0.08	0.75	-0.3	1.06	0.84	0.4	0.73	0.28	-0.06		0.88	-0.09	0.53	-0.08	0.27	0.62	0.73	-0.06
YMR009W_ORF	|| ADI1 || methionine salvage || oxidoreductase activity, acting on single donors with incorporation of molecular oxygen, incorporation of two atoms of oxygen || YMR009W || Hypothetical ORF || 1450618	-0.26	1.3		0.37	-0.56	0.14	0.59	1.99		-0.22	0.1				0.4	-0.14	0.14	0.13		0.38	0.9	0.58	-0.76	0.86	0.34	-1.06	-0.52	-0.02	-0.58	-0.38	-0.08	1.29	-0.24	0.63		-0.41	-1.33	0.86	0.28	0.1	-0.02	0.49	0.76	0.56	0.39
YIL105C_ORF	|| SLM1 || actin cytoskeleton organization and biogenesis* || phosphoinositide binding || YIL105C || AVO2 interactor || 1450619	-0.7	0.25	2.72	-2.27	0.06	-0.58	0.11	-1.14		-0.49	-0.78	-2.34	-1.69		-1.28	-1.29	-1.32	-0.99		-1.57	-0.98	-0.45	-2.34	-1.26	-3.53	0.74	-0.44	-1.41	-4.63	-1.36	-0.7	2.38	-1.87	-1.21		-1.76	-3.35	1.28	0.05	-0.68	-0.88	-0.61	-1.35	-1.07	-0.57
YLR406C_INT_1	|| RPL31B || translation || structural constituent of ribosome || YLR406C || YBOX_INT1000228:INT_1_YLR406C:NC_001144:complement(931348..931696) || 1450620	1.11		2.69	1.66	0.56	1.03	1.81	1.15		0.76	0.9		0.46	3.54	-2.03	0.93	0.83	0.55		1.4	-0.07	1.28	1.55	0.56		2.11	0.91	0.86	1.12	-0.43	1.42	1.66	0.4	1.08		0.92		1.86	-2.18	1.03	1.24	0.71	1.17	0.74	1.34
YAL040C_ORF	|| CLN3 || G1/S transition of mitotic cell cycle* || cyclin-dependent protein kinase regulator activity || YAL040C || G1 cyclin || 1450621	-0.57	0.47	-0.25	-0.51	-0.92	0.05	-0.58	-0.26		-1.37	-0.99		-1.79	0.59	-0.8	-0.37	-0.91	-0.15		-0.6	0.69	-0.22	-0.23	-0.37	-1.43	-1.47	-1.12	-1.44	-1.75	-1.57	-1.22	-1.24	-1.29	0.22	-1.32	-1.18		-1.42	-0.88	-0.66	0.54	-0.67	-0.43	-0.2	-0.51
YBL091C-A_ORF	|| SCS22 || biological_process* || molecular_function || YBL091C-A || SCS2 homologue || 1450622	0.59	1.06	1.94	-0.3	0.15	0.4	0.74	1.66		-0.55	0.94	-2.11	-0.79	0.43	0.97	0.17		0.67		0.06	0.29	0.86	0.06	0.5	0.52	1.16	-0.13	-0.64	0.36	-0.62	0.72		0.77	1.25		-0.12	-1.01	1.18	1.47	0.4	-0.04	0.18		0.23	0.79
YGR177C_ORF	|| ATF2 || steroid metabolic process || alcohol O-acetyltransferase activity || YGR177C || alcohol acetyltransferase || 1450623	-1.1		0.82	-1.15	-1.08	-0.44	-0.18			-0.28	0.04	-1.96		-2.19	-0.62	-0.31	0.36	-0.56		-0.2	-0.13	0.22	-1.39	-0.7	-2.57	0.06	-0.55	-0.9	-0.06	-1.29	-0.15	-2.1	-0.32	-0.41		-2.06		1.19	0.34	-1.1	-1.34	-0.26	-0.64	-0.56	-0.79
YDR159W_ORF	|| SAC3 || mRNA export from nucleus* || protein binding || YDR159W || A component of the nuclear pore that is involved in the nuclear export of both mRNA and protein || 1450624	-1.09	-0.41	0.23	-1.59	-1.27	-0.97	0.3	-0.2		-1.67	-0.6	-2.43	-0.95	-2.06	-1.14	-0.23		-0.84		-1.53	-0.35	-0.2	-0.99	-1.04	-2.44	-1.31	-1.54	-0.83	-0.88	-1.44	-1.23	0.41	-1.65	-1.07		-1.8		-0.47	0.91	-1.05	-0.56	-0.48	-1.83	-0.72
YLR344W_INT_1	|| RPL26A || translation || structural constituent of ribosome* || YLR344W || YBOX_INT1000226:INT_1_YLR344W:NC_001144:819331..819777 || 1450625	-0.57	1.52	-0.29	-0.39		0.29	0.94	-0.04		-0.25	0.88	-2.52	0.37	1.78	-1.81	-0.46	0.07	0.15		0.2	-0.37	0.88	0.43		2.44	0.05	0.55	-1.14	0.62	-0.35	0.2	-1.73	-0.85	-0.17	1.41	0.04		0.28	-0.31	0.09	0.69	-0.09	1.42	-0.23	-0.07
YPL283C_ORF	|| YRF1-7 || telomere maintenance via recombination || DNA helicase activity || YPL283C || Y'-helicase protein 1 || 1450626	-0.83	-1.67	-0.64	-0.43	-0.95	-1.13	-0.62	-2.04		-1.23	-1.37	-1.16	-0.56	-1.91	0.21	0.6	-0.7	-1.1	-1.52	-1.2	0.28	0.11	0.03	-1.33	1	-0.48	-1.27	-1.66	-0.99	-1.19	-1.24	-1.16	-0.79	-0.92	-2.46	-0.8	-2.81	0.11	-1.06	-0.79	2.04	0.28	-2.92	-0.95	-1.46
Q0080_ORF	|| ATP8 || ATP synthesis coupled proton transport || hydrogen ion transporting ATP synthase activity, rotational mechanism || Q0080 || ATP synthase subunit 8|mitochondrially encoded || 1450627	1.05	-0.22	-2.72	0.83	2.13	1.53	-0.99	-1.58	2.34	0.95	-1.32	-0.68	-0.76	-1.5	1.65	0.57	1.53	3.18	2.54	0.98	-1.47	0.47	0.17	0.52	-5.13	-2.44	-1.8	-0.71	-1.41	0.78	0.21	-2.26	-1.65	-0.3	2.03	-0.89	0.04	-2.08	0.28	-0.77	0.46	-0.94	0.88	0.81	0.4
YMR044W_ORF	|| IOC4 || chromatin remodeling || protein binding || YMR044W || Iswi One Complex || 1450628	-0.14	-0.85	-0.29	-0.93	-1.67	-0.87	-0.18	0.27	-4.03	-0.5	1.23	-2.96	0.6	0.46	-1.3	-1.19	-1.49	-1.13	-1.67	-0.68	-1.31	-0.6	0.2	-0.1	0.81	-0.33	-0.13	0.75	-0.54	-0.57	-0.85	0.44	-1.64	-0.64		-1.83	-0.55	1	-0.27	-2.06	-0.15	0.27	-0.28	-1.52	-1.27
YOR277C_ORF	|| || || || YOR277C || Hypothetical ORF || 1450629	1.03	0.53	1.17	-0.04	0.11	1	-0.59	1.53	-2.22	0.82	0.32	-1.01	0.27	0.85	0.1	-0.35	0.67	0.9		0.11	1.04	-0.02	0.23	0.52	1.76	0.96	0.27	-0.05	-0.32	-0.04	0.19	0.37	0.16	0.73	-0.29	0.55	-0.2	1.45	0.45	0.31	-0.12	-0.32	1.02	0.71	1.27
YLR087C_ORF	|| CSF1 || fermentation || molecular_function || YLR087C || Protein required for fermentation at low temperature || 1450630	-1.73		1.46		-1.11	-1.52	0.24			-1.13			1.25			0.13	-0.58	-0.93		0.26	-1.26	-0.56			-1.17	-0.36	-2.85	0.23	-0.25	-0.72	-1.2		0.05	-1.73		-3.03		1.22	0.74	1.16	3.37	0.93	-1.66	-1.88	-2.27
YNL222W_ORF	|| SSU72 || 35S primary transcript processing* || RNA binding* || YNL222W || functionally related to TFIIB, affects start site selection in vivo || 1450632		1.24	1.47	-0.14	-0.95	0.03	0.17			-0.03	0.47		-1.42			-0.05	-1.09	-0.09		-0.01	-0.16	0.19	0.29	0.18	0.07	0.58	0.73	-0.48	-0.9	-0.07	0.11	-2.33	-1.52	0.18	-1.38	-0.18		1.71	0.17	0.43	0.66	0.05	0.46	-0.8	0.69
YLR156C-A_OCH__ORF	|| || biological_process || molecular_function || YLR156C-A || YBOX_OCH1000261:YLR156C-A_YLR156C-A_SGDID:S0028564_Chr_XII_472611-472480_RC_Unc_ORF_2 || 1450633	-0.99	-0.07	-1.26	3.53	3.92	-1.87	0.64	0.3	1.62	0.78	0.39	0.77	-1.41	-2.11	0.72	-0.08	-1.54	-0.62	5.23	-1	-0.92	0.56	-1.49	3.95	-0.82	-0.51	1.82	-0.2	-3.42	0.47	2.04	-1.79	-2.09	-0.94	1.12	0.97	3.88	0.85	-0.69	-2.67	2.85	0.34	4.26	-1.02	1.54
YNL050C_ORF	|| || biological_process || molecular_function || YNL050C || Hypothetical ORF || 1450634	-0.31	1.07	1.39	-0.22	0.04	-0.45	-0.5	0.19		1.05		-2.58		0.49	-0.89			-1.07	-2.47	-0.38	-0.3	0.25	0.34	-0.83	2.1	-0.54	-0.45	-0.51	0.03	-0.53	-1.55		-0.52	0.45	-1.46	-0.4		0.93		1.03	-0.4	-0.38	0.17	-0.64	0.4
YBR084C-A_OCH_DS100_ORF	|| RPL19A || translation || structural constituent of ribosome || YBR084C-A || YBOX_OCH1000219:DS100_YBR084C-A_YBR084C-A_Chr02_(complement(414080..414179))_100_bp._28_0 || 1450635	0.1	-1.24	-1.95	-0.66	-1.06	-0.29	-2.16	-2.01	0.57	-0.46	-1.62	0.22	-1.5	-2.2	0.16	-1.02	-1.33	0.21	-0.12	-1.14	0.06	-0.43	-0.47	0.47	1.36	-1.39	-1.07	-0.72	-1.81	-1.02	-1.12	-1.67	-0.74	-0.17	1.18	0.01	-2.99	-1.91	-1.45	-0.54	0.08	-0.62	0.57	0.26	-0.11
YJR026W_ORF	|| || || || YJR026W || TyA Gag protein; the main structural constituent of virus-like particles (VLPs) || 1450637	-1.15	-2.37	-2.56	-0.7	-1.64	-0.52	-3.91	-2.23	-2.11	-1.58	-1.71	-0.94	-1.6	-2.23	-1.98	-1.33	-1.56	-1.07	-0.25	-1.78	-0.66	-1.78	-1.21	-0.93	-2.56	-2.48	-2.49	-1.75	-1.15	-1.15	-1.47	-2.22	-2.27	-0.07	-1.47	-1.83	-2.08	-2.53	-1.98	-2.31	-1.01	-1.57	-1.42	-1.42	-1.58
IGR_CHR12:(949499..949634)_66	|| || || || || YBOX_IGR1000097:NLR135W:NLR135W:chr12.fsa:(949499..949634):136:bp._66_0 || 1450638	0.98	-0.27	2.26	0.26	0.68	-0.32		1.7		0.61	0			2.46		0.39		0.03		0.89	0.37				0.81	1.34	-0.09	-0.44	0.95	-0.48	0.65	1.33	1.36	0.26		0.89		2.08	1.11	0.77	0.19	0.28	0.22	0.73
YJL075C_ORF	|| APQ13 || || || YJL075C || Protein of unknown function || 1450639	0.48	3.15	3.1	-1.98	-0.23		1.56	3.08			-1.54		0.26	2.84	-0.95	-0.3	-0.09	-0.14		-0.52	-0.84	0.53			0.12		-0.19	-3.99	-0.71	-1.61	1.09	1.48		-0.32		0.37		0.8	0.83	1.25	-0.76	0	-0.07	-0.79	0.93
YER116C_ORF	|| SLX8 || telomere maintenance* || molecular_function || YER116C || || 1450641	-0.05	-0.18	1.09	0.63	0.43	0.23	0.64	0.24		-0.43	0.11	-2.09	0.98	-0.49	-0.39	-0.01	-0.4	-0.43		-0.41	-0.41	-0.04	0.54	-0.45	0.62	0.46	-0.36	0.14	-0.23	-0.87	-0.09	0.66	0.26	-0.29		-1.14		1.09	-1.13	-0.39	0.03	0.37	-0.37	0.39	-0.56
YER180C-A_ONO_ORF	|| SLO1 || protein targeting to vacuole || small GTPase regulator activity || YER180C-A || YBOX_ONO1000133:YER180C-A_SLO1_SGDID:S0028437_Chr_V_551117-550860_RC_Ver_ORF_50 || 1450642	0.33	1.74	0.71	0.92	0.5	0.94	0.87	0.99		0.86	0.46	-0.75	-2.42	1.55		0.28	0.14	-0.26		0.36	0.53	0.79	-0.26	0.54	3.22	1.53	0.71	-2.64	0.35	-0.25	0.8	0.81	0.55	-0.07		0.19	-0.81	1.1	0.81	1.1	-0.23	0.38	1.18	-0.24	0.64
YDR194C_ORF	|| MSS116 || RNA splicing || RNA binding* || YDR194C || RNA helicase DEAD box || 1450643	-0.25	-1.02	-0.46	-1.22	-1.64	-0.4	-0.11	-1.08		-0.72	-0.35			-1.19	0.16	-1.07	0.39	-0.4		-1.21	-0.1	-0.55	-0.2	-0.24	-0.46	-1.2	-1.16	-0.18	-1.9	-1.45	-0.93	-0.85		-0.34	-1.75	-1.4		-1.25	-0.04	-1.11	-0.67	-0.1	-0.35	-0.72	-0.92
YNR001C_ORF	|| CIT1 || tricarboxylic acid cycle* || citrate (Si)-synthase activity || YNR001C || citrate synthase || 1450644	-0.59	-1.19	-2.06	-1.31	-1.2	-0.86	-0.87	-0.25	-3.75	-0.93	-0.24	-1.85	0.41		0.44	-0.27	-0.36	-0.56	-1.27	-1.11	0.27	-0.93	-1.35	-0.32	-1.95	-1.18	-0.55	-1.14	-1.25	-0.98	-1.41	-0.19	-1.71	-1.1	-3.01	-0.58	-0.35			-0.96	-0.57	-0.64	-0.76	-0.81	-0.23
YMR251W_ORF	|| GTO3 || glutathione metabolic process || glutathione transferase activity || YMR251W || Hypothetical ORF || 1450645					1.11	0.65				0.94	2.8			2.22	0.73		1.11					1.95	-0.01	-1.93	1.56		-0.04	0.09	0.75					0.36		-0.68		2.19	1.05	1.37		0.36	0.04
YKL204W_ORF	|| EAP1 || telomere maintenance* || eukaryotic initiation factor 4E binding || YKL204W || functionally analogous to mammalian 4E-BPsfunctional and limited sequence similarity to CAF20 || 1450647	-0.86	-1.4	-3.15	-0.27	0.24	-0.77	-0.83	-1.02		-2.08	-1.93	-2.55	-0.2	1.06	-1.37	-1.81	-1.56	-1.01		-1.1	-0.76	-1.04	-0.18	-0.75	-2.53	-0.7	-1.53	-1.71	-1.72	-1.11	-1	-1.14	-0.07	-0.44		-0.68	-2.38	-0.12	0.29	-1.71	-0.96	-0.86	-1.03	-1.66	-0.81
YAL039C_AAA_4_NCR	|| CYC3 || cytochrome c-heme linkage || holocytochrome-c synthase activity || YAL039C || POLYA_DS100_YAL039C_chr=I_(complement(68549..68648))_4:YBOX_AAA1000001 || 1450648							0.18			-0.01		-2.59				-0.82		0.57				-0.22						1.07			1.41			0.66					-2.21			0.66			0.19
YJR061W_ORF	|| || biological_process || molecular_function || YJR061W || Hypothetical ORF || 1450649	-0.92	-0.08	1.22	0.23	0.05	-0.09				0.53	1.34	-2.12		0.57	-0.6	0.06	0.3	-1.16		0.34	-0.36	0.05	-0.02		-0.67	0.97	1.84	0.64	0.11	-1.01	0.34		2.45	0.47		1.01		0.79	1.03	0.27	0.36	0.29	-0.48	1.33	0.18
YMR216C_ORF	|| SKY1 || response to drug* || protein kinase activity || YMR216C || SRPK1-like Kinase in Yeast (SRPK1 is a human serine kinase that specifically phosphoryates arginine-serine rich domains found in the SR family of splicing factors.) || 1450650	-0.75	-0.73	-2.1	-1.04	-0.87	-0.51	-0.9	1.04		-0.15	-0.23	-3.38	-0.03	0.74	-0.47	-0.27	-1.65	-0.42		-1.04	0.05	-0.36	-0.58	-0.7	1.07	-1.46	-1.38	0.23	0.05	-0.22	-0.97	0.99	-2.23	0.2	-1.89	-0.89	-6.23	-0.16	-0.29		-0.69	-0.98	-0.68	-0.4	-0.85
YLR466W_ORF	|| YRF1-4 || telomere maintenance via recombination || DNA helicase activity || YLR466W || Y'-helicase protein 1 || 1450651	-1.28		-1.77	-0.83	-1.4	-1.43	-0.72	-1.26		-2.24	-1.2	-0.95	-1.06	-1.65	0.1	-0.1	0.24	-1.18	-1.63	-1.65	-0.19	0.06	-0.76	-2	1.03	-2.02	-1.5	-1.52	-1.55	-0.97	-0.68	-1.99	-0.55	-1.11		-1.57	-1.96	-1.39	-1.42	-0.73	1.7	-0.02	-1.19	-0.96	-1.94
YKL032C_ORF	|| IXR1 || DNA repair || DNA binding || YKL032C || intrastrand crosslink recognition protein || 1450652	-0.84	-0.26	-3.56	-0.83	-1.09	-0.35	-0.08	-3.29		-1.23	-1.49	-1.63	-0.63	1.19	-0.37	-0.86	-1.65	-0.37	-3.44	-1.09	0.11	-1.02	-1.01	-0.59	-2.25	-0.94	-2.49	-0.38	-2.88	-1.2	-1.37	-1.21	0.02	-0.26		-1.35	-1.84	-0.45	-0.19	-1	-0.46	-0.62	-0.84	-1.16	-0.86
YLR294C_ORF	|| || || || YLR294C || Hypothetical ORF || 1450653	-0.25	0.1	-0.49	-0.17	-0.41	-0.19	-0.9	-0.38	-3.49	-0.48	-0.49	-0.2	-0.12		0.04	-0.24	0.5	-0.42		-0.44	-0.26	-0.38	0.09	0.54	-1.36	0.36	-0.4	0.26	-0.48	0.54	-0.52	-1.08	0.55	0.29	-0.99	-0.26	0.54	0.91	0.59	0.9	0.41	-0.34	0.6	0.19	0.38
YER151C_ORF	|| UBP3 || response to drug* || ubiquitin-specific protease activity || YER151C || ubiquitin-specific protease || 1450654	-1.08	-0.16	3.01	-0.86	1.47	-1.1	-0.58	1.23		0.33	0.31	-1.73	1.05	0.14	-1.4	0.03	2.02	0.12		-1.66	-0.82	-0.48	-0.38	-1.45	-0.28	1.33	-0.34	-1.2	-1.07	-1.37	1.21	1.32	2.04	0.36	-4.23	-0.61		1.89	0.96	-1.45	-1.32	-0.56	-1.76	-0.01	0.71
YGL092W_ORF	|| NUP145 || mRNA export from nucleus* || RNA binding* || YGL092W || nuclear pore complex subunit || 1450655	-1	-0.02	-0.04	-0.56	-2.97	-0.86	-1.2			-0.17	0.14	-1.62	0.47	-0.63	-1.3	-0.71	0.07	-0.5		-0.88	-0.3	-0.46	-0.77	-1.1	-2.23	-0.57	-0.89	-1.21	-0.7	-1.99	-0.28	-0.85	0.66	-0.19		-0.93		-0.16	-0.94	-2.06	-0.97	-1	-1.51	-1.03	-1.11
YDR538W_ORF	|| PAD1 || aromatic compound catabolic process || carboxy-lyase activity || YDR538W || phenylacrylic acid decarboxylase || 1450656	-0.52	2.98	0.19	0.51	-0.04	0.78	0.85	2.45		0.27	1.38	-2.84		0.58	0.55	0.15	1.38	0.6		0.41	0.69	1.24	0.1	0.58	-0.12	-0.31	0.72	0.64	-0.05	0.13	0.3	-1.51	-0.36	0.16		0.13		2.2	0.24	0.76	0.05	0.53	0.24	1.35	-0.05
YGL057C_ORF	|| || biological_process || molecular_function || YGL057C || Hypothetical ORF || 1450658	0.12	0.82	0.37	0.17	-0.42	-0.34	1.03	2.88		1.47	1.03	-2.35		0.15	-0.89	-0.71		-0.41		-0.05	-0.69	0.07	0.61	0.29	-0.93	0.76	0.92	-1.08	0.48	-0.05	0.63		1.45		-0.77	-1.29		2	1.35	0.03	0.44	0.14	-0.42	0.61
YOR032W-A_ONO_ORF	|| || biological_process || molecular_function || YOR032W-A || YBOX_ONO1000115:YOR032W-A_YOR032W-A_SGDID:S0028710_Chr_XV_392175-392375_Unc_ORF_126 || 1450659	-1.12			0.8	1.09	0.58	1.69	2.63		0.03						-0.38		0.54		0.33	1.52		0.27		-0.03		1.84	1.04	0.85		0.11	1.87	0.62	-0.39		-0.76		2.46	1.4	0.88		0.81	0.22	0.69
YPL114W_ORF	|| || || || YPL114W || Hypothetical ORF || 1450660	0.66		-0.27	0.45	0.64	0.39	0.57			-0.5	0.72	-2.56			-0.12	-0.32	0.05	0.58		1.05	1.18	0.59		-3.45	-0.86	1.75	-0.97	0.77		-0.84	0.31	1.82		0.2		0.3		2.69	0.6		0.75	-0.06		0.44	0.68
IGR_CHR02:(526804..526980)_40	|| || || || || YBOX_IGR1000146:gBR08_9:gBR08_9:chr02.fsa:(526804..526980):177:bp._40_0 || 1450661										0.14	3.12	-3.29			-0.62					1.41								-1.07		-1.18			0.48					3				0.03			-0.78
YOR108W_ORF	|| LEU9 || leucine biosynthetic process || 2-isopropylmalate synthase activity || YOR108W || alpha-isopropylmalate synthase (2-isopropylmalate synthase) || 1450662	0.98	1.33	0.87	2.37	2.35	1.31	-1.38	1.44	1.28	3.24	2.26	0.99	0.87	-1.09	0.36	0.3	0.23	1.39	2.78	2.44	0.82	-0.25	1.4	1.69	0.11	1.46	2.66	0.89	0.98	1.37	2.29	2.37	1.95	0.67	2.51	3.13	2.85	0.69	1.14	-0.12	-1.27	-0.46	3.01	1.03	2.28
YEL020W-A_ORF	|| TIM9 || protein import into mitochondrial inner membrane || unfolded protein binding* || YEL020W-A || Translocase in inner membrane of mitochondria involved in mitochondrial protein import || 1450663	0.34	-0.59	1.56	0.16	-0.07	0.34	0.57	1.17		0.78	-1.39	-1.54	-1.74	0.21	-0.61	-0.74		0.1	-2.74	-0.32	0.24	0.1	0.1	0.25	-0.66	-0.23	0.13	-0.66	-0.43	0.17	-1.3	-0.22	0.27	0.47	0.58	0.49	-0.5	-0.83	0.82	-0.05	0.32	0.18	0.67	0.07	1.03
YOL157C_ORF	|| || biological_process || molecular_function || YOL157C || Hypothetical ORF || 1450664	-2.54	1.98	1.41	0.64	0.24		1.22	2.76			1.01	-1.53			0.41		0.81			-0.41		0.46			0.53		0.63	0.22		0.25	-1.92					-1.17			0.84	0.05	1.02	1.27			0.16
YHL014C_ORF	|| YLF2 || biological_process || GTP binding || YHL014C || Protein with weak similarity to B. subtilis GTP-binding protein and to human glycogen phosphorylases || 1450665	-0.17	0.63	-0.12	0.45	-0.36	0.03	0.91	2.24		0.04	0.73	-3.58	1.58	2.79	-0.24	0.92		0.26		0.88	0.98	0.6	0.25	0	1.76	1.55	0.26	0.04	0.92	-0.16	1.33	0.28	0.99	0.68		0.12	-3.43	0.18	1.7	-0.04	0.64	0.19		0.16	0.23
YBR133C_ORF	|| HSL7 || G2/M transition of mitotic cell cycle* || histone methyltransferase activity || YBR133C || Has homology to arginine methyltransferases || 1450666	-0.32	-0.44	-0.95	-0.46	-0.43	-0.2	0.22	-0.16		-1.05	-0.83	-2.04	0.64	-0.47	0.08	0.32	0.22	-0.43		-0.84	0.15	0.55	-0.41	-0.99	-0.94	-1.18	-0.61	-1.08	-1.16	-0.74	-0.83	-0.8	-0.7	-0.39		-1.72		-1.25	-0.19	-0.63	0.58	0.28	-1	-0.75	-0.75
YGR008C_ORF	|| STF2 || ATP synthesis coupled proton transport* || molecular_function || YGR008C || ATPase stabilizing factor || 1450667	0.33	0.31	0.46	0.18	-0.47	0.15	0.23	1.05	-0.48	-0.36	-0.63	-0.53	0.19	0.44	-0.54	0.27	1.04	0.28	-2.71	-0.32	0.58	-0.22	0.06	0.99	-1.64	-0.64	-0.04	0.1	0.22	0.45	-0.41	-0.73	0.08	-0.19	-0.9	-0.24	0.59	0.83	0.72	-0.37	0.29	0.19	0.85	0.18	0.45
YGL229C_ORF	|| SAP4 || G1/S transition of mitotic cell cycle || protein serine/threonine phosphatase activity || YGL229C || SAP4 is related to SAP155, SAP185, and SAP190, all of which associate with the SIT4 protein phosphatase || 1450668	0.25	2.48	1.01	-1.99	0.72	-1.52	1.08	2.44		-0.92	1.39	-2.88	0.81		-0.86	-2.09	1.27	-0.28		0.5	-0.25	0.26	-0.42	-2.41	-1.79	0.54	0.33	-0.96	0.54	-1.65	-2.35		-2.24	-0.8		-3.67		2.22	0.88	-0.9	0.51	0.25	-0.73	-0.75	-0.17
YCR068W_ORF	|| ATG15 || autophagy* || lipase activity || YCR068W || Lipase, required for intravacuolar lysis of autophagic bodies; located in the endoplasmic reticulum membrane and targeted to intravacuolar vesicles during autophagy via the multivesicular body (MVB) pathway || 1450669	-1.06	2.28	3.59	0.16	0.5	-0.49	0.58	2.48		-0.48	1.19	-4.57	0.76	2.78	-0.84	0.81	1.01	-0.51		-1.1	0.21	0.67	-0.1	-0.71	0.49	0.42	0.36	-0.58	-0.27	-1.42	0.4	1.7	0.32	0.21		-0.57		2.28	1.05	-0.58	-0.43	0.6	-0.89	-1.46	0.18
YDL039C_ORF	|| PRM7 || response to drug* || molecular_function || YDL039C || Pheromone-regulated protein, predicted to have one transmembrane segment; promoter contains Gcn4p binding elements || 1450670	-0.62	0.73	-0.79	-1.17	-0.47	-1.04	0.56	-1.36		0.03	-1.11	-1.92	-0.4	-0.06	-3.77	-0.46	-1.33	-1.15		-0.87	-0.58	1.25	-1.87		0.48	-1.53	-1.26	-0.65	-0.81	-1.06	-0.61	-1.59	-0.2	-1.32		-1.89		0.19	-1.05		-0.71	-0.83	-2.38	-0.92	0.01
YEL031W_ORF	|| SPF1 || protein amino acid glycosylation* || ATPase activity, coupled to transmembrane movement of ions, phosphorylative mechanism || YEL031W || P-type ATPase || 1450671	-0.47	0.81	-1.62	-0.58	-2.35	-2.33	-1.6	-1.22		-2.32	-0.27	-2.71	-1.16	-0.44	-0.35	-1.47	-0.87	-1.09		-1.56	-1.59	-0.63	-1.26	-1.61	-2.31	-1.45	-1.48	-0.61	-0.55	-0.21	-1.6	-1.06	-1.17	-1.97		-3.2		-1.5	-1.61	-1.55	-0.97	-0.56	-1.58	-1.55	-2.75
YGR215W_ORF	|| RSM27 || translation || structural constituent of ribosome || YGR215W || mitochondrial ribosome small subunit component || 1450672	0.24	-0.07	0.44	-0.3	-0.41	0.26	0	0.12	-0.44	-0.7	0.49	-1.8	-0.25	1.1	-0.44	-0.76	-0.97	0.82	0.05	0.32	0.16	0.23	-0.58	0.66	1.85	-0.02	-0.28	-1.14	-0.3	-0.34	-0.24	-0.34	-0.85	0.39	0.03	-0.09	0.16	0.03	0.5	0.04	0.82	0.13	0.66	0.4	0.41
YGR043C_ORF	|| || biological_process || transaldolase activity || YGR043C || Hypothetical ORF || 1450673	0.69			0.25	-0.33	-0.42	1.78			-0.89	2.17	-2.93	1.85		0.04	0.01		0.4		-0.03	-0.77	0.01	0		-0.25		1.58	0.16	1.18	-1.06	-0.62		1.05	-0.45		-1.53	0.33	1.86	-0.2	0.34	0.74	0.2	-0.24	0.57	0.29
YPL152W-A_ONO_ORF	|| || biological_process || molecular_function || YPL152W-A || YBOX_ONO1000125:YPL152W-A_YPL152W-A_SGDID:S0028721_Chr_XVI_264601-264699_Unc_ORF_1 || 1450674	0.5		3.56							1.21		-2.69	0.69		-0.73	-0.3	0.05			0.07		1.24	-0.34		0.19			0.71		-2.72	1.58	2.05		0.3		0.12					-0.39	0.67	-3.29	-0.92	-0.1
YDR025W_ORF	|| RPS11A || translation* || structural constituent of ribosome || YDR025W || ribosomal protein S11A (S18A) (rp41A) (YS12) || 1450675	0.26	-1.4	-1.36	-0.74	-0.76	0.67	-1.5	-1.02	1.37	0.68	-1.06	0.65	-0.13	-1.76	-0.51	-0.61	-1.23	0.59	0.44	-0.68	0.62	-0.17	0.2	0.79	-0.73	-1.02	-0.25	-0.52	-0.93	1.19	-0.82	-1.01	-1.08	-0.02	0.9	0.68	-0.11	-0.9	-0.41	-0.1	0.12	0.13	0.88	1.09	-0.01
YPR100W_ORF	|| MRPL51 || translation* || structural constituent of ribosome || YPR100W || Mitochondrial ribosomal protein of the large subunit || 1450676	0.5	0.02	-0.66	-0.01	-0.96	-0.2	0.02	0.36		0.1	0.53	-0.72	-0.04	-0.72	0.96	0.35	0.47	0.25	-0.71	0.05	0.21	0.19	-0.26	0.22	1.69	0.06	0.03	-0.26	0.01	-0.5	-0.33	-0.96	-0.93	-0.04	0.57	0.22	-0.1	-1.55	0.37	0.03	0.08	-0.33	0.39	-0.22	0.1
YDL074C_ORF	|| BRE1 || telomere maintenance* || ubiquitin-protein ligase activity || YDL074C || putative coiled-coil protein with RING-finger and myosin-like domains || 1450677	-1.33	-0.34	-0.62	-1.01	-1.79	-1.58	0.06	-1.71	-3.33	-1.03	-0.15	-2.37	-0.24	-0.06	-0.67	-0.39	-1.82	-0.59		-1.71	-0.5	-0.85	-0.37	-0.96	-0.03	-1.8	-1.31	-1.15	-1.92	-1.35	-2.04		0.4	-0.92		-1.74		-1.11	-1.29	-1.06	-0.97	-0.95	-1.01	-0.78	0.24
YAL056W_ORF	|| GPB2 || telomere maintenance* || signal transducer activity* || YAL056W || Proposed beta subunit of the heterotrimeric G protein that interacts with the receptor Grp1p, has signaling role in response to nutrients; involved in regulation of pseudohyphal growth through cAMP levels; homolog of Gpb1p || 1450678	-2.29		1.59	-0.04	0.04	-0.86	0.35	1.67		-1.4	0.04		0.67	-0.74	-0.28	-0.34	-0.07	-1.1		-1.91	-0.53	-0.03	-1.69	-3.12	0.79	1.2	-2.13	-0.92	-0.93	-1.88	-1.36	-2.26		-1.65	-5.45	-2.49		1.45	-0.06	0.34	-0.38	0.05	-1.32	-1.25	-0.19
YOR315W_ORF	|| SFG1 || positive regulation of transcription from RNA polymerase II promoter* || specific RNA polymerase II transcription factor activity || YOR315W || Hypothetical ORF || 1450679	0.21	-0.29	-0.54	-0.5	-0.85	-0.14	-1.82	-0.03		-1.01	-0.24	-1.97	-0.36		-0.53	0.16	-3.48	0.2		0.8	0.67	-0.08	-1.53	0.08	-0.64	-0.14	-0.38	0.15	0.36	-0.18	-0.73	0.78	-0.91	0.69		-0.3		0.25	1.06	-0.01	-0.71	-0.65	-0.07	0.48	1.07
YML131W_ORF	|| || response to toxin || molecular_function || YML131W || Hypothetical ORF || 1450680	2.07	1.59	1.6	4.07	4.87	3.13	1.39	3.44	1.85	4.05	2.78	2.63	2.91	0.36	1.03	2.35	1.69	2.76	2.67	2.88	2.98	-0.72	3.42	2.16	0.86	4.7	4.96	1.25	1.41	3.38	4.41	3.08	3.12	2.29		4.12	1.67	2.37	2.95	0.43	-0.51	1.09	2.79	2.08	3.28
YLR125W_ORF	|| || biological_process || molecular_function || YLR125W || Hypothetical ORF || 1450682	0.39	2.56		0.26	0.88	0.77	0.49				2.18			-0.11	1.08	0.12				1.1		1.03		0.18	0.93		0.48				0.59					0.01		1.46	2.6	-0.44	0.9	0.56	-0.46		0.44
YDR060W_ORF	|| MAK21 || ribosome biogenesis and assembly* || molecular_function || YDR060W || essential for 60s ribosome biogenesis; involved in nuclear export of pre-ribosomes || 1450684	-1.97	-2.91	-1.43	-1.88	-1.92	-2.06	-0.35	-0.72		-2.12	-2.16	-2.08	-1.26	-1.23	-1.08	-0.82		-1.51		-1.31	-1.08	-1.04	-0.78	-1.23	1.28	-1.82	-1.98	-1.98	-1.99	-1.79	-1.51	-1.17	-2.13	-1.02		-0.04		-0.62	0.12	-0.89	-1.47	-0.84	-1.86	-1.33	-0.23
YFL034C-B_INT_1	|| MOB2 || protein amino acid phosphorylation* || protein kinase activator activity || YFL034C-B || YBOX_INT1000131:INT_1_YFL034C-B:NC_001138:complement(63859..63972) || 1450685		2.71		1.02		0.24	0.86			0.28	2.85	-2.4	1.17			-1.08				0.5	-1.09	0.76	0.46	-0.86	-0.8	1.76	1.71	-0.23		-1.33					-0.16	-0.26			1.88		1.05	0.37	-3.06	0.63
YIL156W_ORF	|| UBP7 || protein deubiquitination || ubiquitin-specific protease activity || YIL156W || ubiquitin-specific protease || 1450686	-0.14		2.18	-0.61	-2.05	-1.36				0.41	0.34	-2.08		1.21	-0.93	-0.37	-1.19	-1.48		-0.98	-1.5	-0.35	0.09	-1.8	-1.78	-1.57	0.14	-1.65	-0.75	-1.76		1.51		-0.6		-1.56		1.08	1.63	-1.07	-0.3	0.27	-2.27	-0.33
YBL013W_ORF	|| FMT1 || translational initiation* || methionyl-tRNA formyltransferase activity || YBL013W || methionyl-tRNA transformylase || 1450687	0.65	1.56	0.84	0.04	0.56	-0.52	1.43	2.07		0.56	-0.36	-1.16	-1.01	1.47	-0.19	-0.07	0.37	-0.4		-0.88	0.23	0.94	0.41		-0.75	0.32	-0.05	-0.38	-0.46	-0.73	-0.37		0.74	-0.28		-2.31			0.57	-0.24	0.55	1.08	-0.88	-1.61	-1.58
IGR_CHR05:(9552..10552)_137	|| || || || || YBOX_IGR1000158:gEL01_2:gEL01_2:chr05.fsa:(9552..10552):1001:bp._137_0 || 1450688				2.41	1.7					0.41		-4.25	1.98				0.21														2.31								1.49			0.75		-0.34
YKR042W_TIL_5_158__ORF	|| UTH1 || mitochondrion organization and biogenesis* || molecular_function || YKR042W || YBOX_TIL1000151:TIL_YKR042W_UTH1_5_158 || 1450689	-0.12	-0.29	-1.73	-0.51	-1.15	-0.37	-2.67	-1.21	-0.66	-1.2	-1.3	0.22	-1.33	0.05	0.17	0.13	0.18	-0.25	-0.63	-0.54	0.37	-0.06	-0.7	-0.3	-1.31	-1.34	-1.35	-0.72	-0.64	-0.02	-1.23	-1.31	-1.11	-0.24	-0.09	-1.06	-0.34	0.19	-1.14	-0.34	-0.89	-1.5	-0.18	-0.8	-0.83
YDL246C_ORF	|| SOR2 || hexose metabolic process || oxidoreductase activity, acting on the CH-OH group of donors, NAD or NADP as acceptor || YDL246C || Protein of unknown function, computational analysis of large-scale protein-protein interaction data suggests a possible role in fructose or mannose metabolism || 1450690	-0.36	2.77		1.21		0.28		3.29		-0.89	0.95	-1.15		1.91	-0.95	1.05		0.25		1.15	0.02	0.81	0.41	-1.01	1.25	1.62	1.11	1.03	0.97	0.39	1.09	0.01	0.94		-0.19	-0.05		1.01	1.96		1.15	0.78	-0.64	0.37
YJL113W_ORF	|| || || || YJL113W || TyB Gag-Pol protein; proteolytically processed to make the Gag, RT, PR, and IN proteins that are required for retrotransposition || 1450691	-2.4	0.93	2.02	-0.69	-1.67	-0.85	0.02			-1.36	0.35	-3.28	-0.58	0.94	-1.76	-0.43	-1.01	-0.95		-0.5	-0.98	-0.29	0.2	-1.79	-1.56	0.94	0.16	-0.45	-0.76	-1.45	-1.08	0.32	-0.85	-0.64		-3.02		1.51	0.1	-0.15	-0.17	-0.09	-1	-1.42	-0.27
YGR250C_ORF	|| || biological_process || RNA binding || YGR250C || Hypothetical ORF || 1450692	-5.7	0.18		0.23	-0.93	0.6	0.48	1.53		0.19	-0.37	-1.46	-0.04	0.69	-0.25	0.17		0.4		-0.78	0.7	-0.22	0.56	-0.36	-0.31	0.42	-0.11	-0.17	-0.54	-0.4	-0.37	0.05	0.26	1.16	-0.08	-1.32		1.17	0.06	-0.13	0.2	-0.39	-0.22	0.05	0.16
YNL066W_ORF	|| SUN4 || mitochondrion organization and biogenesis || glucosidase activity || YNL066W || Protein involved in the aging process. Related to glucanases. || 1450693	-0.44	0.14	0.02	0.94	1.09	0.69	-2.39	-0.42	-0.39	-1.06	0.11	-0.34	0.8	0.66	1	1.25	1.59	1.03	0.44	0.56	1.5	-0.19	-0.09	0.32	-1.22	0.02	0.11	0.15	0.02	1.15	-0.21	-0.47	-0.23	1.12	-0.75	-0.33	0	0.21	0.23	0.12	-0.42	-0.89	-0.01	0.44	-0.16
YDR232W_ORF	|| HEM1 || regulation of transcription* || 5-aminolevulinate synthase activity || YDR232W || 5-aminolevulinate synthase || 1450694	-0.07	-0.78	0.52	-0.14	-0.41	-0.14	-0.37	-0.75	-3.55	-1.24	-1.28	-1.37	0.59	-0.1	0.04	-0.23	0.54	0.38		-0.6	0.33	0.05	2.39	-0.42	-1.51	-0.97	-0.88	-1.12	-0.6	0.32	-0.9	-0.94	-0.78	0.38	-4.5	-0.94	-0.19	-2.79	-0.12	-0.48	0.08	-0.1	-0.38	-0.34	-0.95
YJR009C_OCH_US100_ORF	|| TDH2 || glycolysis* || glyceraldehyde-3-phosphate dehydrogenase (phosphorylating) activity || YJR009C || YBOX_OCH1000190:US100_YJR009C_YJR009C_Chr10_(complement(454596..454695))_100_bp._1_0 || 1450695	-0.7	-1.57	-2.59	-1.42	0.93	-0.86	1.1	-0.64	-0.87	0.53	0.81		-2.78		-0.05	-0.77	-1.44	-1.32		-1.17	-0.53	0.9	-1.46	0.07	-1.33	1	-1.33	-1.2	-0.61	-0.88	0.02	-1.76	-0.82	-0.99		-1.36		-0.23	0.15	-0.24	-0.09	-0.07	0.05	-1.09	-0.28
YPR078C_ORF	|| || meiosis* || molecular_function || YPR078C || Hypothetical ORF || 1450696				0.87						1.12			1										0.55					0.15		-0.68				0.64		0.6		1.65	0.25						-0.01
YAR042W_ORF	|| SWH1 || endocytosis* || phosphatidylinositol binding* || YAR042W || Similar to mammalian oxysterol-binding protein || 1450697	-1.03	0.17	1.23	-0.71	-1.41	-0.56	0.15	-0.62		-1.53	-0.89	-2.35	-0.24	0.81	-0.92	-0.45	0.12	-0.54		-1.1	-0.02	-0.25	-0.46	-1.19	-1.66	-1.42	-1.09	-0.2	-0.31	-0.69	-0.75	-1.05	-0.59	-0.47	0.66	-0.88	-3.01	-0.31	0.14	-1.37	-0.41	-0.12	-1.22	-0.83	-0.51
YOR350C_ORF	|| MNE1 || biological_process || molecular_function || YOR350C || similar to Lucilia illustris mitochondria cytochrome oxidase || 1450698	0.68	-1.3	-0.67	1.42	0.04	0.09	-0.56	0.72	-2.09	0.39	-0.04		0.66	-1.19	0.78	0.01	0.51	0.46	-3.92	0.58	0.43	-0.25	0.4	0.14	-2.17	-0.15	0.35	0.05	0.07	0.75	0.23	0.34	0.84	0.38		1.86	-0.56	-0.02	1.19	-0.7	0	-0.6	0.18	0.76	0.35
YAR007C_ORF	|| RFA1 || nucleotide-excision repair* || single-stranded DNA binding* || YAR007C || heterotrimeric RPA (RF-A) single-stranded DNA binding protein 69 kDa subunit|RF-A || 1450699	-1.42	1.29	-1.14	-0.51	0.27	-1.06	0.09	-0.53		-1.12	0.56	-4.58	0.07	0.33	-1.01	-1.04	-1.69	-0.79		-1.25	-1.68	-0.85	0.43	-1.39	-2.52	1.16	-0.08	-0.68	-2.11	-0.84	-0.66	-0.83	0.36	-1.11	-2.66	-2.03	-2.13	-0.12	0.31	-0.7	-1.09	-0.04	-0.79	0.01	-1.51
YLR332W_ORF	|| MID2 || cell wall organization and biogenesis* || transmembrane receptor activity || YLR332W || Protein required for mating || 1450700	0.04	-0.34	-3.08	-0.52	0.2	-0.55	-0.18	-0.24		-0.97	-1.55	-2.3	-0.19	-1.34	-0.44	-0.78	-0.88	-1.1		-1.2	-0.54	-0.6	-1.74	0.09	-2.55	-2.14	-1.74	-0.63	-0.7	-0.76	-0.24		-1.02	-0.56		-0.64	-2.4	-0.55	-2.12	-1.14	-0.09	-0.15	-0.23	-0.96	0.31
YOL023W_ORF	|| IFM1 || translational initiation || RNA binding* || YOL023W || mitochondrial initiation factor 2 || 1450701	0.58		-0.74	-1.34	0.42	0.03	0.38	1.29		-0.72	-0.1	-2.58	0.63	2.35	-0.24	-0.35	-1.36	-0.19		-0.74	0.14	-0.22	0.31	-0.54	-0.36	1.78	-0.55	-0.07	-0.22	-1.46	-0.32	-0.89	1.2	0.27		-0.51		-0.43	0.73	-0.66	0.27	-0.1	-0.74	-0.8	0.29
YLR160C_ORF	|| ASP3-4 || asparagine catabolic process* || asparaginase activity || YLR160C || nitrogen catabolite-regulated cell-wall L-asparaginase II || 1450702	-0.24	-0.72	0.72	1.23	0.52	-0.24	-0.95	1.27	-0.55	0.23	0.86	0.85	0.6	1.02	-0.09	1.19	0.86	-0.19	0.61	2.68	0.2	0.39	0.36	0.2	2.35	0.23	0.8	1.39	2.25	1.79	0.22	1.73	0.42	0.3	0.81	0.33	-0.23	-0.05	1.24	1.23	-0.46	-0.17	0.45	-0.27	0.29
YML081C-A_ORF	|| ATP18 || ATP synthesis coupled proton transport || hydrogen ion transporting ATP synthase activity, rotational mechanism || YML081C-A || ATP synthase associated protein || 1450703	0.8	0.16	-1.28	-0.55	-0.48	-0.05	-0.34	-1.08	-0.24	0.81	-0.28	0.25	-1.19	-0.17	-0.3	-0.28	-0.52	-0.53	0.7	-0.44	-0.05	0.3	-0.08	0.64	-0.21	-0.39	-0.03	-0.21	-0.63	-0.13	-0.85	-0.21	-0.76	0.34	0.77	0.94	0.34	0.98	0.32	-0.09	0.56	-0.23	0.8	-0.06	0.56
YNR017W_ORF	|| MAS6 || protein import into mitochondrial matrix || protein transporter activity || YNR017W || 23 kDa mitochondrial inner membrane protein || 1450704	-0.52	-0.13	0.09	-0.38	-0.31	1.41	-1.18	-0.62	-0.86	-0.08	-0.15		0.05	0.36	0.96	-0.14	-0.46	0.84	-0.37	0.08	0.92	-0.07	0.29	0.66	0.17	-1.17	-0.46	-0.02	-0.34	-0.02	-0.22	-1.54	-0.68	0.33	0.67	0.03	0.69	0.63	-0.36	0.2	0.03	-0.14	0.44	0.22	0.22
YNL238W_ORF	|| KEX2 || peptide pheromone maturation || serine-type endopeptidase activity || YNL238W || Ca2+-dependent serine protease || 1450705	-1.84	1.5		-1.02	-1.36	-1.34	-0.52			-1.82	-2.4					0.23	-1.2	-0.64		-1.31	-0.13	-0.14	-0.89	-1.2	-2.14	-0.72	-0.91	0.52	-0.56	-0.97	-1.22	0.99	-0.97	-0.77	-4.28	-0.94		1.78	-2.22	-0.55	-0.65	-0.38	-0.52	-1.44	-1.1
[truncated: 7,086 more rows]
[truncated: 10 more columns]

## Sheet: all features (p<0.01, 3-fold)
Oligo ID	Dfr1 fold	Dfr1 p-value	Gre3 fold	Gre3 p-value	Lap3 fold	Lap3 p-value	Map1 fold	Map1 p-value	Mdh1 fold	Mdh1 p-value	Mdh3 fold	Mdh3 p-value	Meu1 fold	Meu1 p-value	pfk2 fold	Pfk2 p-value	Phr1 fold	Phr1 p-value	Pot1 fold	Pot1 p-value	Pre10 fold	Pre10 p-value	Sti1 fold	Sti1 p-value	Ymr1 fold	Ymr1 p-value	Gene Name / Description
[truncated: 506 more rows]

[truncated: 2 more sheets: ORFs (p<0.01, 3-fold), # summary]
