# Supplementary material for: A Screen for RNA-Binding Proteins in Yeast Indicates Dual Functions for Many Enzymes
Source: PLoS One. 2010 Nov 11;5(11):e15499. doi: 10.1371/journal.pone.0015499 (PMC2988813; doi:10.1371/journal.pone.0015499)
Supplement: Table S4 — A selection of significantly enriched GO terms among messages associated with proteins. Terms that belong to the GO category ‘Process’ are written in black; GO terms for ‘Function’ are in red, and the ones for ‘Compartment’ are in blue. (XLS) [file pone.0015499.s005.xls]

## Sheet: GO terms
Protein	GOID	GO_term	Cluster frequency	Background frequency	P-value	Gene(s) annotated to the term
Map1	6412	translation	34 out of 167 genes, 20.4%	379 out of 6336 background genes, 6.0%	6.52e-08	SSA1/YAL005C:ILS1/YBL076C:RPL4A/YBR031W:TEF2/YBR118W:RPS9B/YBR189W:SSB1/YDL229W:RPL4B/YDR012W:SUP35/YDR172W:EFT2/YDR385W:PAB1/YER165W:RPL2A/YFR031C-A:DED81/YHR019C:SSZ1/YHR064C:RPS4B/YHR203C:RPL2B/YIL018W:TIF2/YJL138C:RPS4A/YJR145C:TEF4/YKL081W:MRPL13/YKR006C:RPL8B/YLL045C:RPL15A/YLR029C:RPL10/YLR075W:YEF3/YLR249W:RPP0/YLR340W:RPS1A/YLR441C:ASC1/YMR116C:NIP1/YMR309C:HEF3/YNL014W:RPS3/YNL178W:SSB2…
	6414	translational elongation	11 out of 167 genes, 6.6%	37 out of 6336 background genes, 0.6%	6.78e-07	TEF2/YBR118W:RPS9B/YBR189W:SSB1/YDL229W:EFT2/YDR385W:SSZ1/YHR064C:TEF4/YKL081W:YEF3/YLR249W:RPP0/YLR340W:HEF3/YNL014W:SSB2/YNL209W:TEF1/YPR080W
	44281	small molecule metabolic process	47 out of 167 genes, 28.1%	791 out of 6336 background genes, 12.5%	1.43e-05	ATP6/Q0085:CDC19/YAL038W:ILS1/YBL076C:ATP3/YBR039W:PGI1/YBR196C:PDB1/YBR221C:SHM1/YBR263W:PSA1/YDL055C:YDL124W:HOM2/YDR158W:YPR1/YDR368W:CAB1/YDR531W:GLY1/YEL046C:DLD3/YEL071W:PMI40/YER003C:SAH1/YER043C:PDA1/YER178W:LPD1/YFL018C:ERG26/YGL001C:LEU1/YGL009C:ERG25/YGR060W:ASN2/YGR124W:RNR4/YGR180C:PFK1/YGR240C:ENO1/YGR254W:DED81/YHR019C:DYS1/YHR068W:GND1/YHR183W:TDH1/YJL052W:URA2/YJL130C:TDH2/YJR009…
	6096	glycolysis	7 out of 167 genes, 4.2%	22 out of 6336 background genes, 0.3%	0.00045	CDC19/YAL038W:PGI1/YBR196C:PFK1/YGR240C:ENO1/YGR254W:TDH1/YJL052W:TDH2/YJR009C:GPM1/YKL152C
	3824	catalytic activity	93 out of 167 genes, 55.7%	2044 out of 6336 background genes, 32.3%	2.95e-08	COX1/Q0045:AI2/Q0055:AI4/Q0065:AI5_ALPHA/Q0070:ATP6/Q0085:COB/Q0105:SSA1/YAL005C:PMT2/YAL023C:CDC19/YAL038W:YAR009C:ILS1/YBL076C:IPP1/YBR011C:OLA1/YBR025C:ATP3/YBR039W:VMA2/YBR127C:PGI1/YBR196C:PDB1/YBR221C:SHM1/YBR263W:PSA1/YDL055C:SUB2/YDL084W:YDL124W:RPO21/YDL140C:SSB1/YDL229W:SNQ2/YDR011W:HOM2/YDR158W:TRR1/YDR353W:YPR1/YDR368W:CAB1/YDR531W:GLY1/YEL046C:DLD3/YEL071W:PMI40/YER003C:ARB1/YER036C:…
	16462	pyrophosphatase activity	29 out of 167 genes, 17.4%	346 out of 6336 background genes, 5.5%	2.54e-06	ATP6/Q0085:SSA1/YAL005C:IPP1/YBR011C:OLA1/YBR025C:ATP3/YBR039W:VMA2/YBR127C:SUB2/YDL084W:SSB1/YDL229W:SNQ2/YDR011W:ARB1/YER036C:PMA1/YGL008C:YRF1-3/YGR296W:PPA1/YHR026W:YIL177C:TIF2/YJL138C:SSA2/YLL024C:YLL066C:YLL067C:YEF3/YLR249W:HSP60/YLR259C:DCS1/YLR270W:VMA6/YLR447C:YRF1-5/YLR467W:YML133C:HEF3/YNL014W:SSB2/YNL209W:VPH1/YOR270C:PMA2/YPL036W:HSP82/YPL240C
	16887	ATPase activity	21 out of 167 genes, 12.6%	221 out of 6336 background genes, 3.5%	3.6e-05	ATP6/Q0085:SSA1/YAL005C:OLA1/YBR025C:ATP3/YBR039W:VMA2/YBR127C:SUB2/YDL084W:SSB1/YDL229W:SNQ2/YDR011W:ARB1/YER036C:PMA1/YGL008C:PPA1/YHR026W:TIF2/YJL138C:SSA2/YLL024C:YEF3/YLR249W:HSP60/YLR259C:VMA6/YLR447C:HEF3/YNL014W:SSB2/YNL209W:VPH1/YOR270C:PMA2/YPL036W:HSP82/YPL240C
	1950	plasma membrane enriched fraction	18 out of 167 genes, 10.8%	86 out of 6336 background genes, 1.4%	6.19e-10	SSA1/YAL005C:CDC19/YAL038W:PGI1/YBR196C:YDL124W:SSB1/YDL229W:HOM2/YDR158W:PMA1/YGL008C:PIL1/YGR086C:ENO1/YGR254W:TDH1/YJL052W:TIF2/YJL138C:TDH2/YJR009C:ARP3/YJR065C:SSA2/YLL024C:SSB2/YNL209W:PDR16/YNL231C:LSP1/YPL004C:PMA2/YPL036W
	5737	cytoplasm	131 out of 167 genes, 78.4%	3466 out of 6336 background genes, 54.7%	1.06e-08	COX1/Q0045:AI2/Q0055:AI4/Q0065:AI5_ALPHA/Q0070:AI5_BETA/Q0075:ATP6/Q0085:COB/Q0105:SSA1/YAL005C:PMT2/YAL023C:CDC19/YAL038W:ERV46/YAL042W:PET9/YBL030C:ILS1/YBL076C:IPP1/YBR011C:OLA1/YBR025C:RPL4A/YBR031W:ATP3/YBR039W:TEF2/YBR118W:VMA2/YBR127C:RPS9B/YBR189W:PGI1/YBR196C:PDB1/YBR221C:SHM1/YBR263W:SSH1/YBR283C:PSA1/YDL055C:YDL124W:RPO21/YDL140C:SNQ2/YDR011W:RPL4B/YDR012W:HOM2/YDR158W:SUP35/YDR172W:SR…
	5840	ribosome	27 out of 167 genes, 16.2%	339 out of 6336 background genes, 5.4%	2.27e-05	RPL4A/YBR031W:TEF2/YBR118W:RPS9B/YBR189W:RPL4B/YDR012W:EFT2/YDR385W:ARB1/YER036C:PAB1/YER165W:RPL2A/YFR031C-A:RPS4B/YHR203C:RPL2B/YIL018W:TIF2/YJL138C:RPS4A/YJR145C:TEF4/YKL081W:MRPL13/YKR006C:RPL8B/YLL045C:RPL15A/YLR029C:RPL10/YLR075W:MAP1/YLR244C:YEF3/YLR249W:RPP0/YLR340W:RPS1A/YLR441C:ASC1/YMR116C:HEF3/YNL014W:RPS3/YNL178W:RPL3/YOR063W:RPS9A/YPL081W:TEF1/YPR080W
	33176	proton-transporting V-type ATPase complex	5 out of 167 genes, 3.0%	14 out of 6336 background genes, 0.2%	0.00251	VMA2/YBR127C:CUP5/YEL027W:PPA1/YHR026W:VMA6/YLR447C:VPH1/YOR270C
Mdh3	17111	nucleoside-triphosphatase activity	11 out of 47 genes, 23.4%	326 out of 6336 background genes, 5.1%	0.00087	ATP1/YBL099W:YBL113C:OLA1/YBR025C:ARB1/YER036C:YJL225C:DRS1/YLL008W:YLL066C:YEF3/YLR249W:DBP9/YLR276C:YRF1-5/YLR467W:HEF3/YNL014W
	4386	helicase activity	6 out of 47 genes, 12.8%	80 out of 6336 background genes, 1.3%	0.00112	YBL113C:YJL225C:DRS1/YLL008W:YLL066C:DBP9/YLR276C:YRF1-5/YLR467W
	16462	pyrophosphatase activity	11 out of 47 genes, 23.4%	346 out of 6336 background genes, 5.5%	0.00152	ATP1/YBL099W:YBL113C:OLA1/YBR025C:ARB1/YER036C:YJL225C:DRS1/YLL008W:YLL066C:YEF3/YLR249W:DBP9/YLR276C:YRF1-5/YLR467W:HEF3/YNL014W
Pot1	6412	translation	12 out of 18 genes, 66.7%	379 out of 6336 background genes, 6.0%	7.35e-10	RPL19B/YBL027W:RPS9B/YBR189W:RPL2A/YFR031C-A:RPS4B/YHR203C:RPL2B/YIL018W:TMA19/YKL056C:RPL8B/YLL045C:RPL13B/YMR142C:RPL20A/YMR242C:RPL16B/YNL069C:RPS9A/YPL081W:RPS6A/YPL090C
	3735	structural constituent of ribosome	11 out of 18 genes, 61.1%	213 out of 6336 background genes, 3.4%	7.45e-12	RPL19B/YBL027W:RPS9B/YBR189W:RPL2A/YFR031C-A:RPS4B/YHR203C:RPL2B/YIL018W:RPL8B/YLL045C:RPL13B/YMR142C:RPL20A/YMR242C:RPL16B/YNL069C:RPS9A/YPL081W:RPS6A/YPL090C
Pre10	16787	hydrolase activity	28 out of 103 genes, 27.2%	827 out of 6336 background genes, 13.1%	0.00684	FUN12/YAL035W:SNQ2/YDR011W:CYM1/YDR430C:SMC1/YFL008W:GPA1/YHR005C:VMA5/YKL080W:LAP4/YKL103C:RPT1/YKL145W:DRS1/YLL008W:MDN1/YLR106C:YPT6/YLR262C:DBP9/YLR276C:SFH1/YLR321C:GAB1/YLR459W:NTE1/YML059C:ORC1/YML065W:DNF3/YMR162C:MKT1/YNL085W:DCP2/YNL118C:YNL217W:POP1/YNL221C:DSE4/YNR067C:HST1/YOL068C:GSP2/YOR185C:BRO1/YPL084W:GDE1/YPL110C:UME1/YPL139C:CTI6/YPL181W
Sti1	722	telomere maintenance via recombination	6 out of 87 genes, 6.9%	19 out of 6336 background genes, 0.3%	5.31e-05	MEC1/YBR136W:YRF1-1/YDR545W:YRF1-2/YER190W:YRF1-3/YGR296W:YRF1-5/YLR467W:YRF1-6/YNL339C
	6310	DNA recombination	10 out of 87 genes, 11.5%	149 out of 6336 background genes, 2.4%	0.01301	RDH54/YBR073W:MEC1/YBR136W:YRF1-1/YDR545W:YRF1-2/YER190W:YRF1-3/YGR296W:MLH2/YLR035C:YRF1-5/YLR467W:TOP2/YNL088W:YRF1-6/YNL339C:MMS1/YPR164W
	51276	chromosome organization	16 out of 87 genes, 18.4%	389 out of 6336 background genes, 6.1%	0.02528	SAS3/YBL052C:RDH54/YBR073W:MEC1/YBR136W:SNF5/YBR289W:YRF1-1/YDR545W:YRF1-2/YER190W:YRF1-3/YGR296W:TRA1/YHR099W:STH1/YIL126W:DYN1/YKR054C:YRF1-5/YLR467W:TOP2/YNL088W:APC1/YNL172W:YRF1-6/YNL339C:SNF2/YOR290C:SGV1/YPR161C
	4386	helicase activity	17 out of 87 genes, 19.5%	80 out of 6336 background genes, 1.3%	1.53e-14	YBL113C:YRF1-1/YDR545W:BRR2/YER172C:YRF1-2/YER190W:SLH1/YGR271W:YRF1-3/YGR296W:YHL050C:STH1/YIL126W:YIL177C:YJL225C:YLL066C:YLL067C:YRF1-5/YLR467W:YML133C:YRF1-6/YNL339C:YRF1-8/YOR396W:YPR204W
	16462	pyrophosphatase activity	25 out of 87 genes, 28.7%	346 out of 6336 background genes, 5.5%	1.56e-10	YBL113C:RDH54/YBR073W:YRF1-1/YDR545W:BRR2/YER172C:YRF1-2/YER190W:SLH1/YGR271W:YRF1-3/YGR296W:YHL050C:STH1/YIL126W:YIL177C:YJL225C:MYO3/YKL129C:DYN1/YKR054C:YLL066C:YLL067C:MDN1/YLR106C:GSP1/YLR293C:YRF1-5/YLR467W:YML133C:HEF3/YNL014W:DCP2/YNL118C:YRF1-6/YNL339C:SNF2/YOR290C:YRF1-8/YOR396W:YPR204W
	17111	nucleoside-triphosphatase activity	24 out of 87 genes, 27.6%	326 out of 6336 background genes, 5.1%	3.2e-10	YBL113C:RDH54/YBR073W:YRF1-1/YDR545W:BRR2/YER172C:YRF1-2/YER190W:SLH1/YGR271W:YRF1-3/YGR296W:YHL050C:STH1/YIL126W:YIL177C:YJL225C:MYO3/YKL129C:DYN1/YKR054C:YLL066C:YLL067C:MDN1/YLR106C:GSP1/YLR293C:YRF1-5/YLR467W:YML133C:HEF3/YNL014W:YRF1-6/YNL339C:SNF2/YOR290C:YRF1-8/YOR396W:YPR204W
	16787	hydrolase activity	29 out of 87 genes, 33.3%	827 out of 6336 background genes, 13.1%	5.44e-05	YBL113C:RDH54/YBR073W:YRF1-1/YDR545W:BRR2/YER172C:YRF1-2/YER190W:SLH1/YGR271W:YRF1-3/YGR296W:YHL050C:STH1/YIL126W:YIL177C:YJL225C:MYO3/YKL129C:SPO14/YKR031C:DYN1/YKR054C:YLL066C:YLL067C:MDN1/YLR106C:GSP1/YLR293C:YRF1-5/YLR467W:YML133C:HEF3/YNL014W:INP52/YNL106C:DCP2/YNL118C:FIG4/YNL325C:YRF1-6/YNL339C:ISN1/YOR155C:SNF2/YOR290C:YRF1-8/YOR396W:YPR204W
	3824	catalytic activity	50 out of 87 genes, 57.5%	2044 out of 6336 background genes, 32.3%	6.67e-05	SAS3/YBL052C:YBL113C:RDH54/YBR073W:MEC1/YBR136W:RPO21/YDL140C:GCN2/YDR283C:YRF1-1/YDR545W:BRR2/YER172C:YRF1-2/YER190W:GSY1/YFR015C:SLH1/YGR271W:YRF1-3/YGR296W:YHL050C:TRA1/YHR099W:PRP8/YHR165C:STH1/YIL126W:YIL177C:CYR1/YJL005W:YJL225C:GRR1/YJR090C:HOM6/YJR139C:CYT2/YKL087C:MYO3/YKL129C:SPO14/YKR031C:DYN1/YKR054C:YLL066C:YLL067C:PDC1/YLR044C:MDN1/YLR106C:PDC5/YLR134W:GSP1/YLR293C:YRF1-5/YLR467W:YM…
Ymr1	6412	translation	24 out of 65 genes, 36.9%	379 out of 6336 background genes, 6.0%	3.04e-11	RPL19B/YBL027W:TEF2/YBR118W:RPS9B/YBR189W:RPS8B/YER102W:RPL7A/YGL076C:RPL11B/YGR085C:RPS0A/YGR214W:RPL8A/YHL033C:SSZ1/YHR064C:RPL16A/YIL133C:MRPL13/YKR006C:RPL8B/YLL045C:RPS0B/YLR048W:RPS1A/YLR441C:RPS1B/YML063W:ASC1/YMR116C:RPL15B/YMR121C:RPL13B/YMR142C:RPL20A/YMR242C:PET111/YMR257C:TIF11/YMR260C:RPS9A/YPL081W:RPL7B/YPL198W:SUI3/YPL237W
	44267	cellular protein metabolic process	31 out of 65 genes, 47.7%	1130 out of 6336 background genes, 17.8%	9.51e-06	RPL19B/YBL027W:TEF2/YBR118W:RPS9B/YBR189W:CPR1/YDR155C:YDR161W:PMI40/YER003C:RPS8B/YER102W:ACT1/YFL039C:RPL7A/YGL076C:RPL11B/YGR085C:RPS0A/YGR214W:RPL8A/YHL033C:SSZ1/YHR064C:RPL16A/YIL133C:MRPL13/YKR006C:RPL8B/YLL045C:RPS0B/YLR048W:RCK2/YLR248W:RPS1A/YLR441C:RPS1B/YML063W:CPR3/YML078W:ASC1/YMR116C:RPL15B/YMR121C:RPL13B/YMR142C:RPL20A/YMR242C:PET111/YMR257C:TIF11/YMR260C:HSP10/YOR020C:RPS9A/YPL081…
	19538	protein metabolic process	31 out of 65 genes, 47.7%	1176 out of 6336 background genes, 18.6%	2.49e-05	RPL19B/YBL027W:TEF2/YBR118W:RPS9B/YBR189W:CPR1/YDR155C:YDR161W:PMI40/YER003C:RPS8B/YER102W:ACT1/YFL039C:RPL7A/YGL076C:RPL11B/YGR085C:RPS0A/YGR214W:RPL8A/YHL033C:SSZ1/YHR064C:RPL16A/YIL133C:MRPL13/YKR006C:RPL8B/YLL045C:RPS0B/YLR048W:RCK2/YLR248W:RPS1A/YLR441C:RPS1B/YML063W:CPR3/YML078W:ASC1/YMR116C:RPL15B/YMR121C:RPL13B/YMR142C:RPL20A/YMR242C:PET111/YMR257C:TIF11/YMR260C:HSP10/YOR020C:RPS9A/YPL081…
	3735	structural constituent of ribosome	18 out of 65 genes, 27.7%	213 out of 6336 background genes, 3.4%	1.03e-10	RPL19B/YBL027W:RPS9B/YBR189W:RPS8B/YER102W:RPL7A/YGL076C:RPL11B/YGR085C:RPS0A/YGR214W:RPL8A/YHL033C:RPL16A/YIL133C:MRPL13/YKR006C:RPL8B/YLL045C:RPS0B/YLR048W:RPS1A/YLR441C:RPS1B/YML063W:RPL15B/YMR121C:RPL13B/YMR142C:RPL20A/YMR242C:RPS9A/YPL081W:RPL7B/YPL198W
	5198	structural molecule activity	21 out of 65 genes, 32.3%	337 out of 6336 background genes, 5.3%	3.83e-10	RPL19B/YBL027W:RPS9B/YBR189W:SED1/YDR077W:RPS8B/YER102W:ACT1/YFL039C:RPL7A/YGL076C:RPL11B/YGR085C:RPS0A/YGR214W:RPL8A/YHL033C:RPL16A/YIL133C:ARC19/YKL013C:MRPL13/YKR006C:RPL8B/YLL045C:RPS0B/YLR048W:RPS1A/YLR441C:RPS1B/YML063W:RPL15B/YMR121C:RPL13B/YMR142C:RPL20A/YMR242C:RPS9A/YPL081W:RPL7B/YPL198W
	3786	actin lateral binding	2 out of 65 genes, 3.1%	2 out of 6336 background genes, 0.0%	0.00591	TPM2/YIL138C:TPM1/YNL079C
	5840	ribosome	25 out of 65 genes, 38.5%	339 out of 6336 background genes, 5.4%	5.64e-14	RPL19B/YBL027W:TEF2/YBR118W:RPS9B/YBR189W:YDR026C:SED1/YDR077W:RPS8B/YER102W:RPL7A/YGL076C:RPL11B/YGR085C:RPS0A/YGR214W:RPL8A/YHL033C:RPL16A/YIL133C:MRPL13/YKR006C:RPL8B/YLL045C:RPS0B/YLR048W:RPS1A/YLR441C:RPS1B/YML063W:ASC1/YMR116C:RPL15B/YMR121C:RPL13B/YMR142C:RPL20A/YMR242C:TIF11/YMR260C:RPS9A/YPL081W:RPL7B/YPL198W:NIP7/YPL211W:SUI3/YPL237W
	43228	non-membrane-bounded organelle	33 out of 65 genes, 50.8%	1061 out of 6336 background genes, 16.7%	2.11e-08	RPL19B/YBL027W:CMD1/YBR109C:TEF2/YBR118W:RPS9B/YBR189W:NOP6/YDL213C:YDR026C:SED1/YDR077W:CPR1/YDR155C:RPS8B/YER102W:ACT1/YFL039C:RPL7A/YGL076C:RPL11B/YGR085C:RPS0A/YGR214W:RPL8A/YHL033C:RPL16A/YIL133C:TPM2/YIL138C:ARC19/YKL013C:MRPL13/YKR006C:RPL8B/YLL045C:RPS0B/YLR048W:RPS1A/YLR441C:RPS1B/YML063W:ASC1/YMR116C:RPL15B/YMR121C:RPL13B/YMR142C:RPL20A/YMR242C:TIF11/YMR260C:HHT2/YNL031C:TPM1/YNL079C:RP…
	5737	cytoplasm	56 out of 65 genes, 86.2%	3466 out of 6336 background genes, 54.7%	5.29e-06	RPL19B/YBL027W:OLA1/YBR025C:CMD1/YBR109C:TEF2/YBR118W:VMA2/YBR127C:RPS9B/YBR189W:RPO21/YDL140C:YDR026C:SED1/YDR077W:CPR1/YDR155C:YDR161W:GUK1/YDR454C:PMI40/YER003C:AIM9/YER080W:RPS8B/YER102W:YPT1/YFL038C:ACT1/YFL039C:RPL7A/YGL076C:RPL11B/YGR085C:RPS0A/YGR214W:ENO1/YGR254W:RPL8A/YHL033C:VMA22/YHR060W:SSZ1/YHR064C:RPL16A/YIL133C:TPM2/YIL138C:SOD1/YJR104C:GPM1/YKL152C:MRPL13/YKR006C:RPL8B/YLL045C:CO…
